# Supplementary material for: Small RNA and Degradome Sequencing Reveal Important MicroRNA Function in Nicotiana tabacum Response to Bemisia tabaci
Source: MDPI journal article supplement (doi:10.3390/genes13020361), 2022-02-17
Supplement: s1 [file Supplementary Data S1. Summary of known and novel miRNA in this study_20220216.xlsx]

## Sheet: Sheet1
Item	Description
Pre-miRNA Index	Pre-miRNA Cluster Index
miRNA_Index	mature miRNA
miR_name	The miR_name is composed of the 1st known miR name in a cluster, a underscore, and a matching annotation: such as
	L-n means the miRNA_seq (detected) is n base less than known rep_miRSeq in the left side;
	R-n means the miRNA_seq (detected) is n base less than known rep_miRSeq in the right side;
	L+n means the miRNA_seq (detected) is n base more than known rep_miRSeq in the left side;
	R+n means the miRNA_seq (detected) is n base more than known rep_miRSeq in the right side;
	2ss5TC13TA means 2 substitution (ss), which are T->C at position 5 and T->A at position 13
	if there is no matching annotation, the miRNA_seq (detected) is exactly same as known rep_miRSeq.
	New discovered 5p/3p sequence has been annotated as p3/p5: which is directly differentiate with the reported sequences,
miR_seq	is a read at 5' or 3' of maximum mapped score in each cluster.
len	miR_seq length
genome ID	Reference Genome Information
strand	strand "+" or "-"
start	pre-miRNA start position
end	Pre-miRNA end position
pre-miRNA_seq	pre-miRNA sequence
#mir/MIR	mapped mir numbers in miRbase, the number in this item eaquals to the sum of mirIDs
mirIDs	is all mirID in a cluster, seprated by ,
rep_mirID	is the representative known mirID
rep_mirSeq	is the representative known mir sequence
rep_miRID	is the representative known miRID
rep_miRSeq	is the representative known miR sequence
type	is 5' or 3', which means the cluster appears at 5' or 3' end
Sequence in miRbase	New, miRNA identified in this study and not reported in miRBase,mainly for new reported 5p or 3p sequence; Diff, confirming miRNA sequences in miRBase, but different sequences are reported in our study; and Yes, confirming miRNA sequences in miRBase.
group	gp1a:Reads were mapped to miRNAs/pre-miRNAs of specific species in miRbase and the pre-miRNAs were further mapped to genome & EST.
	gp1b:Reads were mapped to (except for specific species) miRNAs/pre-miRNAs of selected species in miRbase and the pre-miRNAs were further mapped to genome & EST.
	gp2a:Reads were mapped to miRNAs/pre-miRNAs of selected species in miRbase and the mapped pre-miRNAs were not further mapped to genome, but the reads (and of course the miRNAs of the pre-miRNAs) were mapped to genome. The extended genome sequences from the genome loci may form hairpins.
	gp2b:Reads were mapped to miRNAs/pre-miRNAs of selected species in miRbase and the mapped pre-miRNAs were not further mapped to genome, but the reads (and of course the miRNAs of the pre-miRNAs) were mapped to genome. The extended genome sequences from the genome loci may not form hairpins.
	gp3:Reads were mapped to miRNAs/pre-miRNAs of selected species in miRbase and the mapped pre-miRNAs were not further mapped to genome, and the reads were not mapped to genome, either. but the reads were mapped to the miRNAS(Matures)
	gp4:Reads were not mapped to pre-miRNAs of selected species in miRbase. But the reads were mapped to genome & the extended genome sequences from genome may form hairpins.
SS	Secondary Structure
	Criteria:
	1.number of nucleotides in one bulge in stem : <= 12
	2.number of base pairs in the stem region of the predicted hairpin : >= 16
	3.cutoff of free energy : kCal/mol <= -15
	4.length of hairpin : up and down stems + terminal loop >= 50
	5.length of hairpin loop : <= 200
	6.number of nucleotides in one bulge in mature region : <= 4
	7.number of biased errors in one bulge in mature region : <= 2
	8.number of biased bulges in mature region : <= 2
	9.number of errors in mature region : <= 4
	10.number of base pairs in the mature region of the predicted hairpin : >= 12
	11.percent of mature in stem : >= 80
hairpinLen	pre-miRNA length
CG%	GC Content
dG	Free energy
MFEI	MFEI = -dG*100/mirLen/CG%. Reference: Cell. Mol. Life Sci. 63 (2006) 246-254.
raw	Raw data; from #reads(all),is the number of reads for isoform at 5' or 3' end.
norm	Normalized data
Expression Level	High:The number of reads in the following reported miRNAs is higher than the average copy of the data set.Medium:The number of reads in the following reported miRNAs is higher than 10 and less than average copy of the data set.Low:The number of reads in the following reported miRNAs is less than 10
Summary of known and novel miRNA in this study.
Pre-miRNA Index	miRNA_Index	miR_name	miR_seq	len	genomeID	strand	start	end	pre-miRNA_seq	#mir/MIR	mirIDs,	rep_mirID	rep_mirSeq	rep_miRID	rep_miRSeq	type	Sequence in miRbase	group	SS	hairpinLen	CG%	dG	MFEI	Control_1(raw)	Control_2(raw)	Control_3(raw)	Infested_1(raw)	Infested_2(raw)	Infested_3(raw)	Control_1(norm)	Control_2(norm)	Control_3(norm)	Infested_1(norm)	Infested_2(norm)	Infested_3(norm)	Expression level
1	1	nta-miR156a	TGACAGAAGAGAGTGAGCAC	20	NW_015872208.1	+	51872	51981	aaaagggaggTGACAGAAGAGAGTGAGCACagatggtgttttcttgcattgatatatgtatatgcttgaagctatgcgTGCTCACTCTCTATCTGTCACCcccaccactc	4	nta-MIR156d,gma-MIR156y,fve-MIR156d,bra-MIR156d,	nta-MIR156d	aaaagggaggTGACAGAAGAGAGTGAGCACagatggtgttttcttgcattgatatatgtatatgcttgaagctatgcgtgctcactctctatctgtcacccccaccactc	nta-miR156a	TGACAGAAGAGAGTGAGCAC	5'	Yes	gp1a	....(((.((((((((((((((((((((((..(((((...(((..((((............))))..))))))))..))))))))))))).)))))))))))).......	99	45.5	-56.5	1.1	1279.87	1232.8	958.2	765.4	2245.8	840.2	1357.36	1236.81	918.734	757.14	2160.27	834.918	high
1	2	bra-miR156b-3p_L+1	TGCTCACTCTCTATCTGTCACC	22	NW_015872208.1	+	51872	51981	aaaagggaggTGACAGAAGAGAGTGAGCACagatggtgttttcttgcattgatatatgtatatgcttgaagctatgcgTGCTCACTCTCTATCTGTCACCcccaccactc	4	nta-MIR156d,gma-MIR156y,fve-MIR156d,bra-MIR156d,	bra-MIR156d	tggTGACAGAAGAGAGTGAGCACacatggtggctttcttgcatattggaagatctcatgcttgaagctatgtgtGCTCACTCTCTATCTGTCACCcc	bra-miR156b-3p	GCTCACTCTCTATCTGTCACC	3'	Diff	gp1a	....(((.((((((((((((((((((((((..(((((...(((..((((............))))..))))))))..))))))))))))).)))))))))))).......	99	45.5	-56.5	1.1	50	63.6667	72	63.3333	138	77.6667	53.0275	63.8737	69.0345	62.6499	132.744	77.1784	middle
2	3	nta-miR156a	TGACAGAAGAGAGTGAGCAC	20	NW_015910216.1	-	25980	26086	agaatcaagacTGACAGAAGAGAGTGAGCACacgcaggcaattgtatagagattatattactgtcatttgcgtgTGCTCACTTCTCTTGCTGTCATCtctctctata	1	nta-MIR156c,	nta-MIR156c	agaatcaagacTGACAGAAGAGAGTGAGCACacgcaggcaattgtatagagattatattactgtcatttgcgtgtgctcacttctcttgctgtcatctctctctata	nta-miR156a	TGACAGAAGAGAGTGAGCAC	5'	Yes	gp1a	(((....(((.(((((((((((((((((((((((((((((...((((((...))))))...))))...)))))))))))))).))))).)))))))))...)))...	104	41.1	-48	1.1	1279.87	1232.8	958.2	765.4	2245.8	840.2	1357.36	1236.81	918.734	757.14	2160.27	834.918	high
2	4	nta-MIR156c-p3_1ss22TC	TGCTCACTTCTCTTGCTGTCACC	23	NW_015910216.1	-	25980	26086	agaatcaagacTGACAGAAGAGAGTGAGCACacgcaggcaattgtatagagattatattactgtcatttgcgtgTGCTCACTTCTCTTGCTGTCATCtctctctata	1	nta-MIR156c,	nta-MIR156c	agaatcaagacTGACAGAAGAGAGTGAGCACacgcaggcaattgtatagagattatattactgtcatttgcgtgtgctcacttctcttgctgtcatctctctctata	nta-MIR156c-p3	tgctcacttctcttgctgtcatc	3'	New	gp1a	(((....(((.(((((((((((((((((((((((((((((...((((((...))))))...))))...)))))))))))))).))))).)))))))))...)))...	104	41.1	-48	1.1	3313	3394	2885	3425	3412	5414	3513.6	3405.04	2766.17	3388.04	3282.05	5379.97	high
3	5	nta-miR156a	TGACAGAAGAGAGTGAGCAC	20	NW_015897682.1	+	63810	63905	atgtgataggTGACAGAAGAGAGTGAGCACacatggtgttttcttgcatatgatatacttgaacctatgcgTGCTCACTGCTCTATCTGTCACCcc	3	nta-MIR156a,stu-MIR156k,stu-MIR156g,	nta-MIR156a	atgtgataggTGACAGAAGAGAGTGAGCACacatggtgttttcttgcatatgatatacttgaacctatgcgtgctcactgctctatctgtcacccccacactct	nta-miR156a	TGACAGAAGAGAGTGAGCAC	5'	Yes	gp1a	........((((((((((((((((((((((.(((((.((((...................))))))))).))))))))).)))).)))))))))..	86	44.8	-44.9	1	1279.87	1232.8	958.2	765.4	2245.8	840.2	1357.36	1236.81	918.734	757.14	2160.27	834.918	high
3	6	stu-miR156h-3p_L+1_1ss6AG	TGCTCGCTGCTCTATCTGTCACC	23	NW_015897682.1	+	63810	63905	atgtgataggTGACAGAAGAGAGTGAGCACacatggtgttttcttgcatatgatatacttgaacctatgcgTGCTCACTGCTCTATCTGTCACCcc	3	nta-MIR156a,stu-MIR156k,stu-MIR156g,	stu-MIR156k	TGACAGAAGAGAGTGAGCACacatggtgttttctagcatgatgtttacatgcttgaaactatgtgtGCTCACTGCTCTATCTGTCACC	stu-miR156h-3p	GCTCACTGCTCTATCTGTCACC	3'	Diff	gp1a	........((((((((((((((((((((((.(((((.((((...................))))))))).))))))))).)))).)))))))))..	86	44.8	-44.9	1	5.5	13.5	3.5	8	26.5	16	5.83302	13.5439	3.35584	7.91367	25.4907	15.8994	middle
4	7	ath-miR157a-3p_1ss10CT	GCTCTCTAGTCTTCTGTCATC	21	NW_015841047.1	-	11764	11875	ggagatgctgTTGACAGAAGATAGAGAGCACagatgatgataagatgctaattggaagctttctgcaccttaatcctttgtGCTCTCTAGTCTTCTGTCATCatcctcagcc	3	nta-MIR156h,ath-MIR157a,cas-MIR157a,	ath-MIR157a	gtgTTGACAGAAGATAGAGAGCACagatgatgagatacaattcggagcatgttctttgcatcttactcctttgtGCTCTCTAGCCTTCTGTCATCacc	ath-miR157a-3p	GCTCTCTAGCCTTCTGTCATC	3'	Diff	gp1a	(..((((....(((((((((((((((((((((((.(((..((((.(((................))).))))))).))))))))))))).)))))))))).))))..)....	108	43.8	-47.2	1	423	535	393	326	948	298	448.612	536.74	376.813	322.482	911.895	296.127	middle
4	8	nta-miR156g_L+1	TTGACAGAAGATAGAGAGCAC	21	NW_015841047.1	-	11764	11875	ggagatgctgTTGACAGAAGATAGAGAGCACagatgatgataagatgctaattggaagctttctgcaccttaatcctttgtGCTCTCTAGTCTTCTGTCATCatcctcagcc	3	nta-MIR156h,ath-MIR157a,cas-MIR157a,	nta-MIR156h	ggagatgctgtTGACAGAAGATAGAGAGCACagatgatgataagatgctaattggaagctttctgcaccttaatcctttgtgctctctagtcttctgtcatcatcctcagcc	nta-miR156g	TGACAGAAGATAGAGAGCAC	5'	Diff	gp1a	(..((((....(((((((((((((((((((((((.(((..((((.(((................))).))))))).))))))))))))).)))))))))).))))..)....	108	43.8	-47.2	1	7800.75	8922.17	6580.5	5188.17	13350.3	6061.17	8273.08	8951.18	6309.47	5132.18	12841.9	6023.06	high
5	9	nta-miR156g_L+1	TTGACAGAAGATAGAGAGCAC	21	NW_015834189.1	+	87114	87262	gtgagattgTTGACAGAAGATAGAGAGCACagatgatgatcatgctgctaaatctgggattggagagggcactgaatcaattaaactgcaaaaaaaaaaagcatctcaatTCATTTGTGCTCTCTATGCTTCcgtcatcaccttcaccg	1	nta-MIR156g,	nta-MIR156g	gtgagattgtTGACAGAAGATAGAGAGCACagatgatgatcatgctgctaaatctgggattggagagggcactgaatcaattaaactgcaaaaaaaaaaagcatctcaattcatttgtgctctctatgcttccgtcatcaccttcaccg	nta-miR156g	TGACAGAAGATAGAGAGCAC	5'	Diff	gp1a	(((((..((.((((.(((((((((((((((((((((((((((((((.((.((((...))))..))..)))).)).)))).......(((...........))).......))))))))))))))))).)))).)))).))..)))))..	147	40.9	-52.6	0.9	7800.75	8922.17	6580.5	5188.17	13350.3	6061.17	8273.08	8951.18	6309.47	5132.18	12841.9	6023.06	high
5	10	nta-MIR156g-p3	TCATTTGTGCTCTCTATGCTTC	22	NW_015834189.1	+	87114	87262	gtgagattgTTGACAGAAGATAGAGAGCACagatgatgatcatgctgctaaatctgggattggagagggcactgaatcaattaaactgcaaaaaaaaaaagcatctcaatTCATTTGTGCTCTCTATGCTTCcgtcatcaccttcaccg	1	nta-MIR156g,	nta-MIR156g	gtgagattgtTGACAGAAGATAGAGAGCACagatgatgatcatgctgctaaatctgggattggagagggcactgaatcaattaaactgcaaaaaaaaaaagcatctcaattcatttgtgctctctatgcttccgtcatcaccttcaccg	nta-MIR156g-p3	tcatttgtgctctctatgcttc	3'	New	gp1a	(((((..((.((((.(((((((((((((((((((((((((((((((.((.((((...))))..))..)))).)).)))).......(((...........))).......))))))))))))))))).)))).)))).))..)))))..	147	40.9	-52.6	0.9	64.6667	78.3333	76	91	76	77.3333	68.5822	78.588	72.8698	90.0179	73.1055	76.8472	middle
6	11	nta-miR156a	TGACAGAAGAGAGTGAGCAC	20	NW_015914002.1	+	81193	81295	taaagggaggTGACAGAAGAGAGTGAGCACacatggtattttcttgcatatgatatgcttgaagctatgcgTGCTCACTGCTCTATCTGTCACCcccaccact	10	nta-MIR156e,stu-MIR156h,ptc-MIR156b,mtr-MIR156b,mdm-MIR156o,mdm-MIR156g,mdm-MIR156b,mes-MIR156c,mes-MIR156g,rco-MIR156c,	nta-MIR156e	taaagggaggTGACAGAAGAGAGTGAGCACacatggtattttcttgcatatgatatgcttgaagctatgcgtgctcactgctctatctgtcaccccccaccact	nta-miR156a	TGACAGAAGAGAGTGAGCAC	5'	Yes	gp1a	....(((.((((((((((((((((((((((.((((((...(((..(((((...)))))..))))))))).))))))))).)))).))))))))))))......	93	46.6	-57.9	1.2	1279.87	1232.8	958.2	765.4	2245.8	840.2	1357.36	1236.81	918.734	757.14	2160.27	834.918	high
6	12	stu-miR156h-3p_L+1_1ss6AG	TGCTCGCTGCTCTATCTGTCACC	23	NW_015914002.1	+	81193	81295	taaagggaggTGACAGAAGAGAGTGAGCACacatggtattttcttgcatatgatatgcttgaagctatgcgTGCTCACTGCTCTATCTGTCACCcccaccact	10	nta-MIR156e,stu-MIR156h,ptc-MIR156b,mtr-MIR156b,mdm-MIR156o,mdm-MIR156g,mdm-MIR156b,mes-MIR156c,mes-MIR156g,rco-MIR156c,	stu-MIR156h	TGACAGAAGAGAGTGAGCACacatggtgtattcaagcatgatgtttacatgcttgaagctatgcgtGCTCACTGCTCTATCTGTCACC	stu-miR156h-3p	GCTCACTGCTCTATCTGTCACC	3'	Diff	gp1a	....(((.((((((((((((((((((((((.((((((...(((..(((((...)))))..))))))))).))))))))).)))).))))))))))))......	93	46.6	-57.9	1.2	5.5	13.5	3.5	8	26.5	16	5.83302	13.5439	3.35584	7.91367	25.4907	15.8994	middle
7	13	nta-miR156g_L+1	TTGACAGAAGATAGAGAGCAC	21	NW_015891370.1	-	30306	30420	tgacaattgTTGACAGAAGATAGAGAGCACtaatgatgatatgctaagtaaatgtaggggcaaaagcatctcaattcatttgtGCTCTCTATGCTTCTGTCATCaccttcggcca	1	nta-MIR156j,	nta-MIR156j	tgacaattgtTGACAGAAGATAGAGAGCACtaatgatgatatgctaagtaaatgtaggggcaaaagcatctcaattcatttgtgctctctatgcttctgtcatcaccttcggcca	nta-miR156g	TGACAGAAGATAGAGAGCAC	5'	Diff	gp1a	.......((.((((((((((((((((((((.((((((((.(((((..((..........))...))))).)))..))))).))))))))))).))))))))).))..........	98	40	-44.1	1	7800.75	8922.17	6580.5	5188.17	13350.3	6061.17	8273.08	8951.18	6309.47	5132.18	12841.9	6023.06	high
7	14	nta-MIR156j-p3	GCTCTCTATGCTTCTGTCATC	21	NW_015891370.1	-	30306	30420	tgacaattgTTGACAGAAGATAGAGAGCACtaatgatgatatgctaagtaaatgtaggggcaaaagcatctcaattcatttgtGCTCTCTATGCTTCTGTCATCaccttcggcca	1	nta-MIR156j,	nta-MIR156j	tgacaattgtTGACAGAAGATAGAGAGCACtaatgatgatatgctaagtaaatgtaggggcaaaagcatctcaattcatttgtgctctctatgcttctgtcatcaccttcggcca	nta-MIR156j-p3	gctctctatgcttctgtcatc	3'	New	gp1a	.......((.((((((((((((((((((((.((((((((.(((((..((..........))...))))).)))..))))).))))))))))).))))))))).))..........	98	40	-44.1	1	184.167	302.833	171.5	100.5	507	130.833	195.318	303.818	164.436	99.4154	487.691	130.011	middle
8	15	nta-miR156g_L+1	TTGACAGAAGATAGAGAGCAC	21	NW_015884734.1	+	111	226	tgataattgTTGACAGAAGATAGAGAGCACtgatgatgatatgctaattaaatttgtgcagcaaaagcatctcaattcatttgtGCTCTCTATGCTTCTGTCATCaccttcagcca	4	nta-MIR156i,stu-MIR156d,sly-MIR156a,gra-MIR157a,	nta-MIR156i	tgataattgtTGACAGAAGATAGAGAGCACtgatgatgatatgctaattaaatttgtgcagcaaaagcatctcaattcatttgtgctctctatgcttctgtcatcaccttcagcca	nta-miR156g	TGACAGAAGATAGAGAGCAC	5'	Diff	gp1a	(((....((.((((((((((((((((((((..(((((((.(((((.......((((.....))))))))).)))..))))..))))))))))).))))))))).))...)))....	112	37.1	-46.6	1.1	7800.75	8922.17	6580.5	5188.17	13350.3	6061.17	8273.08	8951.18	6309.47	5132.18	12841.9	6023.06	high
8	16	stu-miR156d-3p_R-1	GCTCTCTATGCTTCTGTCATC	21	NW_015884734.1	+	111	226	tgataattgTTGACAGAAGATAGAGAGCACtgatgatgatatgctaattaaatttgtgcagcaaaagcatctcaattcatttgtGCTCTCTATGCTTCTGTCATCaccttcagcca	4	nta-MIR156i,stu-MIR156d,sly-MIR156a,gra-MIR157a,	stu-MIR156d	TTGACAGAAGATAGAGAGCACtaatgatgatatgctaatttcattcagcaaaagcatctcacttcatttgtGCTCTCTATGCTTCTGTCATCA	stu-miR156d-3p	GCTCTCTATGCTTCTGTCATCA	3'	Diff	gp1a	(((....((.((((((((((((((((((((..(((((((.(((((.......((((.....))))))))).)))..))))..))))))))))).))))))))).))...)))....	112	37.1	-46.6	1.1	184.167	302.833	171.5	100.5	507	130.833	195.318	303.818	164.436	99.4154	487.691	130.011	middle
9	17	nta-miR156f	TGACAGAAGAGAATGAGCAC	20	NW_015930248.1	-	3041	3153	ttaaaggaggTGACAGAAGAGAATGAGCACacatggtgttttcttacatgagatatatatattcatgcttgaaactatgcgTGCTCACTCTCTATCTGTCACCcactttcttt	1	nta-MIR156f,	nta-MIR156f	ttaaaggaggTGACAGAAGAGAATGAGCACacatggtgttttcttacatgagatatatatattcatgcttgaaactatgcgtgctcactctctatctgtcacccactttcttt	nta-miR156f	TGACAGAAGAGAATGAGCAC	5'	Yes	gp1a	..((((..((((((((((((((.(((((((.((((((...(((...((((((.((....))))))))...))))))))).))))))).))))).)))))))))..))))....	107	38.1	-50.7	1.2	95	96	70	64	238	58	100.752	96.3121	67.1169	63.3093	228.936	57.6354	middle
9	18	nta-MIR156f-p3	TGCTCACTCTCTATCTGTCACC	22	NW_015930248.1	-	3041	3153	ttaaaggaggTGACAGAAGAGAATGAGCACacatggtgttttcttacatgagatatatatattcatgcttgaaactatgcgTGCTCACTCTCTATCTGTCACCcactttcttt	1	nta-MIR156f,	nta-MIR156f	ttaaaggaggTGACAGAAGAGAATGAGCACacatggtgttttcttacatgagatatatatattcatgcttgaaactatgcgtgctcactctctatctgtcacccactttcttt	nta-MIR156f-p3	tgctcactctctatctgtcacc	3'	New	gp1a	..((((..((((((((((((((.(((((((.((((((...(((...((((((.((....))))))))...))))))))).))))))).))))).)))))))))..))))....	107	38.1	-50.7	1.2	50	63.6667	72	63.3333	138	77.6667	53.0275	63.8737	69.0345	62.6499	132.744	77.1784	middle
10	19	nta-miR156a	TGACAGAAGAGAGTGAGCAC	20	NW_015800803.1	+	22532	22642	ttaaaggaggTGACAGAAGAGAGTGAGCACccatggtgttttcttacatgagatatatattcatgcttgaagctatgcgTGCTCACTCTCTATCTGTCACCcactgttttc	1	nta-MIR156b,	nta-MIR156b	ttaaaggaggTGACAGAAGAGAGTGAGCACccatggtgttttcttacatgagatatatattcatgcttgaagctatgcgtgctcactctctatctgtcacccactgttttc	nta-miR156a	TGACAGAAGAGAGTGAGCAC	5'	Yes	gp1a	....((..((((((((((((((((((((((.((((((...(((...((((((.......))))))...))))))))).))))))))))))).)))))))))..))......	101	42.3	-55.2	1.2	1279.87	1232.8	958.2	765.4	2245.8	840.2	1357.36	1236.81	918.734	757.14	2160.27	834.918	high
10	20	nta-MIR156b-p3	TGCTCACTCTCTATCTGTCACC	22	NW_015800803.1	+	22532	22642	ttaaaggaggTGACAGAAGAGAGTGAGCACccatggtgttttcttacatgagatatatattcatgcttgaagctatgcgTGCTCACTCTCTATCTGTCACCcactgttttc	1	nta-MIR156b,	nta-MIR156b	ttaaaggaggTGACAGAAGAGAGTGAGCACccatggtgttttcttacatgagatatatattcatgcttgaagctatgcgtgctcactctctatctgtcacccactgttttc	nta-MIR156b-p3	tgctcactctctatctgtcacc	3'	New	gp1a	....((..((((((((((((((((((((((.((((((...(((...((((((.......))))))...))))))))).))))))))))))).)))))))))..))......	101	42.3	-55.2	1.2	50	63.6667	72	63.3333	138	77.6667	53.0275	63.8737	69.0345	62.6499	132.744	77.1784	middle
11	21	nta-MIR159-p5	AGCTGCTGACCTATGGATTCC	21	NW_015911334.1	+	36813	36996	tttgagagtggagctccttgaagtccaacagaggatctaacaggtaagattgAGCTGCTGACCTATGGATTCCtcagccctatctattatttgattggataggtttgtgggttgcatatgtcaggagcttcattgccctaagttggatcccttTTTGGATTGAAGGGAGCTCTAcattcatttg	1	nta-MIR159,	nta-MIR159	tttgagagtggagctccttgaagtccaacagaggatctaacaggtaagattgagctgctgacctatggattcctcagccctatctattatttgattggataggtttgtgggttgcatatgtcaggagcttcattgccctaagttggatcccttTTTGGATTGAAGGGAGCTCTAcattcatttg	nta-MIR159-p5	agctgctgacctatggattcc	5'	New	gp1a	..(((..((((((((((((..(((((((.((.(((((((((.(((((....(((((.(((((.((((...(((.((..((((((((.........))))))))..)).)))...)))).))))).)))))..)))))....)))))))))))..)))))))..))))))))))))..)))....	178	43.5	-86.1	1.1	1093	1321	2021	1884	1694	1544	1159.18	1325.3	1937.76	1863.67	1629.48	1534.29	high
11	22	nta-miR159	TTTGGATTGAAGGGAGCTCTA	21	NW_015911334.1	+	36813	36996	tttgagagtggagctccttgaagtccaacagaggatctaacaggtaagattgAGCTGCTGACCTATGGATTCCtcagccctatctattatttgattggataggtttgtgggttgcatatgtcaggagcttcattgccctaagttggatcccttTTTGGATTGAAGGGAGCTCTAcattcatttg	1	nta-MIR159,	nta-MIR159	tttgagagtggagctccttgaagtccaacagaggatctaacaggtaagattgagctgctgacctatggattcctcagccctatctattatttgattggataggtttgtgggttgcatatgtcaggagcttcattgccctaagttggatcccttTTTGGATTGAAGGGAGCTCTAcattcatttg	nta-miR159	TTTGGATTGAAGGGAGCTCTA	3'	Yes	gp1a	..(((..((((((((((((..(((((((.((.(((((((((.(((((....(((((.(((((.((((...(((.((..((((((((.........))))))))..)).)))...)))).))))).)))))..)))))....)))))))))))..)))))))..))))))))))))..)))....	178	43.5	-86.1	1.1	293819	238309	292988	270524	239264	203476	311609	239084	280921	267605	230152	202197	high
12	23	nta-miR160a	TGCCTGGCTCCCTGTATGCCA	21	NW_015850992.1	+	8829	8938	aacttggatgTGCCTGGCTCCCTGTATGCCAcacactttcaccaatccgcgagttctttgattggctgatcagtgggtggcgtgcgaggagccaagcataccacattata	1	nta-MIR160c,	nta-MIR160c	aacttggatgTGCCTGGCTCCCTGTATGCCAcacactttcaccaatccgcgagttctttgattggctgatcagtgggtggcgtgcgaggagccaagcataccacattata	nta-miR160a	TGCCTGGCTCCCTGTATGCCA	5'	Yes	gp1a	....(((.(((((.(((((((..(((((((((.((((.(((((((((............)))))).)))..)))).)))))))))..))))))).)))))))).......	99	51.8	-54.3	1	2297.83	3468.67	4457.33	2982.83	6205.67	4193.67	2436.97	3479.95	4273.75	2950.64	5969.32	4167.3	high
13	24	nta-miR160a	TGCCTGGCTCCCTGTATGCCA	21	NW_015900812.1	+	44614	44716	aatatgcataTGCCTGGCTCCCTGTATGCCAtttgcagagctcatcggaataccgttgggtccccgtgaatggcgTATGAGGAGCCAAGCATATCCcggatat	1	nta-MIR160a,	nta-MIR160a	aatatgcataTGCCTGGCTCCCTGTATGCCAtttgcagagctcatcggaataccgttgggtccccgtgaatggcgtatgaggagccaagcatatcccggatat	nta-miR160a	TGCCTGGCTCCCTGTATGCCA	5'	Yes	gp1a	.......((((((.(((((((..((((((((((..(...(((((.(((....))).)))))....)..))))))))))..))))))).)))))).........	87	51.5	-49.4	0.9	2297.83	3468.67	4457.33	2982.83	6205.67	4193.67	2436.97	3479.95	4273.75	2950.64	5969.32	4167.3	high
13	25	nta-MIR160a-p3	TATGAGGAGCCAAGCATATCC	21	NW_015900812.1	+	44614	44716	aatatgcataTGCCTGGCTCCCTGTATGCCAtttgcagagctcatcggaataccgttgggtccccgtgaatggcgTATGAGGAGCCAAGCATATCCcggatat	1	nta-MIR160a,	nta-MIR160a	aatatgcataTGCCTGGCTCCCTGTATGCCAtttgcagagctcatcggaataccgttgggtccccgtgaatggcgtatgaggagccaagcatatcccggatat	nta-MIR160a-p3	tatgaggagccaagcatatcc	3'	New	gp1a	.......((((((.(((((((..((((((((((..(...(((((.(((....))).)))))....)..))))))))))..))))))).)))))).........	87	51.5	-49.4	0.9	81.5	109	160	100.5	132.5	142.5	86.4348	109.354	153.41	99.4154	127.454	141.604	middle
14	26	nta-miR160d	TGCCTGGCTCCCTGCATGCCA	21	NW_015908130.1	-	13365	13474	agaagttttgTGCCTGGCTCCCTGCATGCCAcacgctttcaccaatccgcgggttctttgattggctgatcagtgggtggcgtgcgaggagccaagcataccacattata	1	nta-MIR160d,	nta-MIR160d	agaagttttgTGCCTGGCTCCCTGCATGCCAcacgctttcaccaatccgcgggttctttgattggctgatcagtgggtggcgtgcgaggagccaagcataccacattata	nta-miR160d	TGCCTGGCTCCCTGCATGCCA	5'	Yes	gp1a	....((..(((((.(((((((..(((((((((.((((.(((((((((............)))))).)))..)))).)))))))))..))))))).)))))..))......	100	53.6	-53.3	0.9	212	198	316	271	299	270	224.836	198.644	302.985	268.075	287.612	268.303	middle
15	27	nta-miR160a	TGCCTGGCTCCCTGTATGCCA	21	NW_015804585.1	-	42245	42347	gatctgcataTGCCTGGCTCCCTGTATGCCAtttgcagagctcatcggaataccgttgggtccccgtgaatggcgTATGAGGAGCCAAGCATATCCccgatat	2	nta-MIR160b,fve-MIR160b,	nta-MIR160b	gatctgcataTGCCTGGCTCCCTGTATGCCAtttgcagagctcatcggaataccgttgggtccccgtgaatggcgtatgaggagccaagcatatccccgatat	nta-miR160a	TGCCTGGCTCCCTGTATGCCA	5'	Yes	gp1a	.(((...((((((.(((((((..((((((((((..(...(((((.(((....))).)))))....)..))))))))))..))))))).))))))....)))..	100	53.4	-50	0.9	2297.83	3468.67	4457.33	2982.83	6205.67	4193.67	2436.97	3479.95	4273.75	2950.64	5969.32	4167.3	high
15	28	nta-MIR160b-p3	TATGAGGAGCCAAGCATATCC	21	NW_015804585.1	-	42245	42347	gatctgcataTGCCTGGCTCCCTGTATGCCAtttgcagagctcatcggaataccgttgggtccccgtgaatggcgTATGAGGAGCCAAGCATATCCccgatat	2	nta-MIR160b,fve-MIR160b,	nta-MIR160b	gatctgcataTGCCTGGCTCCCTGTATGCCAtttgcagagctcatcggaataccgttgggtccccgtgaatggcgtatgaggagccaagcatatccccgatat	nta-MIR160b-p3	tatgaggagccaagcatatcc	3'	New	gp1a	.(((...((((((.(((((((..((((((((((..(...(((((.(((....))).)))))....)..))))))))))..))))))).))))))....)))..	100	53.4	-50	0.9	81.5	109	160	100.5	132.5	142.5	86.4348	109.354	153.41	99.4154	127.454	141.604	middle
16	29	stu-miR162a-5p_L+1	TGGAGGCAGCGGTTCATCGATC	22	NW_015796641.1	+	41207	41313	ttaagaacacTGGAGGCAGCGGTTCATCGATCtgttccctgaaaggcgataaacaaaatatagcaacaggaatcggTCGATAAACCTCTGCATCCAGcgcttaaccc	3	nta-MIR162a,stu-MIR162a,stu-MIR162b,	stu-MIR162b	GGAGGCAGCGGTTCATCGATCtgttccctgaaagctgaatatatatgcaaaaatacagcaaaaggaaccgaTCGATAAACCTCTGCATCCAG	stu-miR162a-5p	GGAGGCAGCGGTTCATCGATC	5'	Diff	gp1a	(((((....(((((.((((.((((.(((((((..((((.((....((.(((.......))).))..))))))..))))))).)))).)))).)))))..)))))...	104	46.7	-39.1	0.8	45.5	69	57	45	51.5	56	48.255	69.2244	54.6523	44.5144	49.5386	55.648	middle
16	30	nta-miR162a	TCGATAAACCTCTGCATCCAG	21	NW_015796641.1	+	41207	41313	ttaagaacacTGGAGGCAGCGGTTCATCGATCtgttccctgaaaggcgataaacaaaatatagcaacaggaatcggTCGATAAACCTCTGCATCCAGcgcttaaccc	3	nta-MIR162a,stu-MIR162a,stu-MIR162b,	nta-MIR162a	ttaagaacactggaggcagcggttcatcgatctgttccctgaaaggcgataaacaaaatatagcaacaggaatcggTCGATAAACCTCTGCATCCAGcgcttaaccc	nta-miR162a	TCGATAAACCTCTGCATCCAG	3'	Yes	gp1a	(((((....(((((.((((.((((.(((((((..((((.((....((.(((.......))).))..))))))..))))))).)))).)))).)))))..)))))...	104	46.7	-39.1	0.8	14304.5	11496	15930	15951.5	14355	13742	15170.6	11533.4	15273.9	15779.4	13808.3	13655.6	high
17	31	nta-MIR162b-p5	TGGAGGCAGCGGTTCATCGATC	22	NW_015922604.1	-	80588	80682	ttgaggacacTGGAGGCAGCGGTTCATCGATCtgttccctgaacgcaacagcgctgggaatcggTCGATAAACCTCTGCATCCAGcgcttaaacc	1	nta-MIR162b,	nta-MIR162b	ttgaggacactggaggcagcggttcatcgatctgttccctgaacgcaacagcgctgggaatcggTCGATAAACCTCTGCATCCAGcgcttaaacc	nta-MIR162b-p5	tggaggcagcggttcatcgatc	5'	New	gp1a	(((((....(((((.((((.((((.(((((((..(((((....(((....)))..)))))..))))))).)))).)))).)))))..)))))...	92	54.7	-43.5	0.8	45.5	69	57	45	51.5	56	48.255	69.2244	54.6523	44.5144	49.5386	55.648	middle
17	32	nta-miR162a	TCGATAAACCTCTGCATCCAG	21	NW_015922604.1	-	80588	80682	ttgaggacacTGGAGGCAGCGGTTCATCGATCtgttccctgaacgcaacagcgctgggaatcggTCGATAAACCTCTGCATCCAGcgcttaaacc	1	nta-MIR162b,	nta-MIR162b	ttgaggacactggaggcagcggttcatcgatctgttccctgaacgcaacagcgctgggaatcggTCGATAAACCTCTGCATCCAGcgcttaaacc	nta-miR162a	TCGATAAACCTCTGCATCCAG	3'	Yes	gp1a	(((((....(((((.((((.((((.(((((((..(((((....(((....)))..)))))..))))))).)))).)))).)))))..)))))...	92	54.7	-43.5	0.8	14304.5	11496	15930	15951.5	14355	13742	15170.6	11533.4	15273.9	15779.4	13808.3	13655.6	high
18	33	nta-miR164a	TGGAGAAGCAGGGCACGTGCA	21	NW_015913691.1	-	61967	62184	gtgatcaagaTGGAGAAGCAGGGCACGTGCAttactaactcatgcacaggaattgtcagtgaaaatttttatggcattcatctgacatcataattcatagtaccattactgtacttcctagcgtagtggaaaataatggtttggtacttcacatgtatgtgtttccgtttccgttgagttagttcttCATGTGCCTGTCTTCCCCATCatgatcactc	2	nta-MIR164a,nta-MIR164b,	nta-MIR164a	gtgatcaagaTGGAGAAGCAGGGCACGTGCAttactaactcatgcacaggaattgtcagtgaaaatttttatggcattcatctgacatcataattcatagtaccattactgtacttcctagcgtagtggaaaataatggtttggtacttcacatgtatgtgtttccgtttccgttgagttagttcttcatgtgcctgtcttccccatcatgatcactc	nta-miR164a	TGGAGAAGCAGGGCACGTGCA	5'	Yes	gp1a	(((((((.(((((.((((..(((((((((....(((((((((((....((((.((((((((((.............)))).)))))).((((......(((((((..((..(..((((.........))))....)..)).))))))).......))))...)))).....)).)))))))))....)))))))))..)))).))))).)))))))..	216	40.4	-79.1	0.9	18975	19320	26903	22785	23719	27339	20123.9	19382.8	25794.9	22539.1	22815.7	27167.1	high
18	34	nta-MIR164a-p3	CATGTGCCTGTCTTCCCCATC	21	NW_015913691.1	-	61967	62184	gtgatcaagaTGGAGAAGCAGGGCACGTGCAttactaactcatgcacaggaattgtcagtgaaaatttttatggcattcatctgacatcataattcatagtaccattactgtacttcctagcgtagtggaaaataatggtttggtacttcacatgtatgtgtttccgtttccgttgagttagttcttCATGTGCCTGTCTTCCCCATCatgatcactc	2	nta-MIR164a,nta-MIR164b,	nta-MIR164a	gtgatcaagaTGGAGAAGCAGGGCACGTGCAttactaactcatgcacaggaattgtcagtgaaaatttttatggcattcatctgacatcataattcatagtaccattactgtacttcctagcgtagtggaaaataatggtttggtacttcacatgtatgtgtttccgtttccgttgagttagttcttcatgtgcctgtcttccccatcatgatcactc	nta-MIR164a-p3	catgtgcctgtcttccccatc	3'	New	gp1a	(((((((.(((((.((((..(((((((((....(((((((((((....((((.((((((((((.............)))).)))))).((((......(((((((..((..(..((((.........))))....)..)).))))))).......))))...)))).....)).)))))))))....)))))))))..)))).))))).)))))))..	216	40.4	-79.1	0.9	63	57	67	89	30	100	66.8146	57.1853	64.2404	88.0395	28.8574	99.3714	middle
19	35	nta-miR164c	TGGAGAAGCAGGGCACATGCT	21	NW_015849778.1	-	123962	124059	ttatttaagcTGGAGAAGCAGGGCACATGCTaaattacttggtaactttgatctttcaagaattttgcatgtgctcttgctctccagcttaattctcc	1	nta-MIR164c,	nta-MIR164c	ttatttaagcTGGAGAAGCAGGGCACATGCTaaattacttggtaactttgatctttcaagaattttgcatgtgctcttgctctccagcttaattctcc	nta-miR164c	TGGAGAAGCAGGGCACATGCT	5'	Yes	gp1a	....((((((((((((.(((((((((((((.(((((.(((((.............)))))))))).)))))))).)))))))))))))))))......	88	38.8	-47.9	1.3	21	37	24	16	10	32	22.2715	37.1203	23.0115	15.8273	9.61915	31.7988	middle
20	36	nta-MIR166f-p5	GAATGTTGTCTGGCTCGAAGC	21	NW_015950949.1	-	51293	51447	agctttgagggGAATGTTGTCTGGCTCGAAGCcactatctcctcttgatttaacctagttcaagaagtagtatgagtatttttgtcaaagttgtatgaacaaacaataatgagagatagtgtcgTCGGACCAGGCTTCATTCCCCccaatttgga	1	nta-MIR166f,	nta-MIR166f	agctttgaggggaatgttgtctggctcgaagccactatctcctcttgatttaacctagttcaagaagtagtatgagtatttttgtcaaagttgtatgaacaaacaataatgagagatagtgtcgTCGGACCAGGCTTCATTCCCCccaatttgga	nta-MIR166f-p5	gaatgttgtctggctcgaagc	5'	New	gp1a	....(((.((((((((..((((((..(((...(((((((((.((((((...........))))))...................(((..(((((........)))))..))))))))))))...)))..))))))..)))))))).)))......	145	41.3	-54.5	0.9	62.75	79.6	59.2	59.65	78.8	76.6	66.5495	79.8588	56.7617	59.0063	75.7989	76.1185	middle
20	37	nta-miR166a	TCGGACCAGGCTTCATTCCCC	21	NW_015950949.1	-	51293	51447	agctttgagggGAATGTTGTCTGGCTCGAAGCcactatctcctcttgatttaacctagttcaagaagtagtatgagtatttttgtcaaagttgtatgaacaaacaataatgagagatagtgtcgTCGGACCAGGCTTCATTCCCCccaatttgga	1	nta-MIR166f,	nta-MIR166f	agctttgaggggaatgttgtctggctcgaagccactatctcctcttgatttaacctagttcaagaagtagtatgagtatttttgtcaaagttgtatgaacaaacaataatgagagatagtgtcgTCGGACCAGGCTTCATTCCCCccaatttgga	nta-miR166a	TCGGACCAGGCTTCATTCCCC	3'	Yes	gp1a	....(((.((((((((..((((((..(((...(((((((((.((((((...........))))))...................(((..(((((........)))))..))))))))))))...)))..))))))..)))))))).)))......	145	41.3	-54.5	0.9	109789	104846	119330	125775	109231	118197	116437	105187	114415	124418	105071	117454	high
21	38	nta-MIR166b-p5	GAATGTTGTCTGGCTCGAAGC	21	NW_015899063.1	-	39879	40017	agctttgagggGAATGTTGTCTGGCTCGAAGCcattatctcctcttgatttaacctacttcttcttaacttcaaaaatagcagaacaaacaatcatgagatagtgtcgTCGGACCAGGCTTCATTCCCCccaatttgga	1	nta-MIR166b,	nta-MIR166b	agctttgaggggaatgttgtctggctcgaagccattatctcctcttgatttaacctacttcttcttaacttcaaaaatagcagaacaaacaatcatgagatagtgtcgTCGGACCAGGCTTCATTCCCCccaatttgga	nta-MIR166b-p5	gaatgttgtctggctcgaagc	5'	New	gp1a	....(((.((((((((..((((((..(((...(((((((((....(((((........((((.((.............)).)))).....))))).)))))))))...)))..))))))..)))))))).)))......	129	42.4	-45.6	0.8	62.75	79.6	59.2	59.65	78.8	76.6	66.5495	79.8588	56.7617	59.0063	75.7989	76.1185	middle
21	39	nta-miR166a	TCGGACCAGGCTTCATTCCCC	21	NW_015899063.1	-	39879	40017	agctttgagggGAATGTTGTCTGGCTCGAAGCcattatctcctcttgatttaacctacttcttcttaacttcaaaaatagcagaacaaacaatcatgagatagtgtcgTCGGACCAGGCTTCATTCCCCccaatttgga	1	nta-MIR166b,	nta-MIR166b	agctttgaggggaatgttgtctggctcgaagccattatctcctcttgatttaacctacttcttcttaacttcaaaaatagcagaacaaacaatcatgagatagtgtcgTCGGACCAGGCTTCATTCCCCccaatttgga	nta-miR166a	TCGGACCAGGCTTCATTCCCC	3'	Yes	gp1a	....(((.((((((((..((((((..(((...(((((((((....(((((........((((.((.............)).)))).....))))).)))))))))...)))..))))))..)))))))).)))......	129	42.4	-45.6	0.8	109789	104846	119330	125775	109231	118197	116437	105187	114415	124418	105071	117454	high
22	40	nta-MIR166e-p5	GGAATGTTGTCTGGCTCGAGG	21	NW_015819770.1	-	13324	13501	tcagttgaggGGAATGTTGTCTGGCTCGAGGtcaccaactagatccataagctccactttatgcttatttgaacataaagattagttttgtaatataaagattcgttgattatatgaaaaggggttatggatcatgagttagtgttgTCGGACCAGGCTTCATTCCCCccaattgtta	1	nta-MIR166e,	nta-MIR166e	tcagttgaggggaatgttgtctggctcgaggtcaccaactagatccataagctccactttatgcttatttgaacataaagattagttttgtaatataaagattcgttgattatatgaaaaggggttatggatcatgagttagtgttgTCGGACCAGGCTTCATTCCCCccaattgtta	nta-MIR166e-p5	ggaatgttgtctggctcgagg	5'	New	gp1a	.((((((.((((((((..((((((..(((...(((.((((.(((((((((.((((.(((((((.((((..((((..........)))).))))))))))).(((((.......)))))..)))))))))))))...)))).)))...)))..))))))..)))))))).))))))...	174	38.8	-68.7	1	493.333	693.933	714.867	490.4	822.8	676.267	523.204	696.19	685.423	485.108	791.463	672.016	middle
22	41	nta-miR166a	TCGGACCAGGCTTCATTCCCC	21	NW_015819770.1	-	13324	13501	tcagttgaggGGAATGTTGTCTGGCTCGAGGtcaccaactagatccataagctccactttatgcttatttgaacataaagattagttttgtaatataaagattcgttgattatatgaaaaggggttatggatcatgagttagtgttgTCGGACCAGGCTTCATTCCCCccaattgtta	1	nta-MIR166e,	nta-MIR166e	tcagttgaggggaatgttgtctggctcgaggtcaccaactagatccataagctccactttatgcttatttgaacataaagattagttttgtaatataaagattcgttgattatatgaaaaggggttatggatcatgagttagtgttgTCGGACCAGGCTTCATTCCCCccaattgtta	nta-miR166a	TCGGACCAGGCTTCATTCCCC	3'	Yes	gp1a	.((((((.((((((((..((((((..(((...(((.((((.(((((((((.((((.(((((((.((((..((((..........)))).))))))))))).(((((.......)))))..)))))))))))))...)))).)))...)))..))))))..)))))))).))))))...	174	38.8	-68.7	1	109789	104846	119330	125775	109231	118197	116437	105187	114415	124418	105071	117454	high
23	42	nta-MIR166h-p5	GGAATGTTGTTTGGCTCGAGG	21	NW_015900715.1	-	97784	97935	tctattgtggGGAATGTTGTTTGGCTCGAGGattcttcaatcttgatcaaattctttctattttttatagatctgcatattaatatagatctataatattgaatcatgattttggtgtcgTCGGACCAGGCTTCATTCCCCtcaaagattgc	1	nta-MIR166h,	nta-MIR166h	tctattgtggggaatgttgtttggctcgaggattcttcaatcttgatcaaattctttctattttttatagatctgcatattaatatagatctataatattgaatcatgattttggtgtcgTCGGACCAGGCTTCATTCCCCtcaaagattgc	nta-MIR166h-p5	ggaatgttgtttggctcgagg	5'	New	gp1a	(((.(((.((((((((..(..(((..(((.((..((..((((.(((((((..............((((((((((..((....))..))))))))))..)))).))).))))..))..)).)))..)))..)..)))))))).))))))....	148	34.9	-51.4	1	804	1014	1212	634	769	817	852.681	1017.3	1162.08	627.158	739.712	811.864	middle
23	43	nta-miR166a	TCGGACCAGGCTTCATTCCCC	21	NW_015900715.1	-	97784	97935	tctattgtggGGAATGTTGTTTGGCTCGAGGattcttcaatcttgatcaaattctttctattttttatagatctgcatattaatatagatctataatattgaatcatgattttggtgtcgTCGGACCAGGCTTCATTCCCCtcaaagattgc	1	nta-MIR166h,	nta-MIR166h	tctattgtggggaatgttgtttggctcgaggattcttcaatcttgatcaaattctttctattttttatagatctgcatattaatatagatctataatattgaatcatgattttggtgtcgTCGGACCAGGCTTCATTCCCCtcaaagattgc	nta-miR166a	TCGGACCAGGCTTCATTCCCC	3'	Yes	gp1a	(((.(((.((((((((..(..(((..(((.((..((..((((.(((((((..............((((((((((..((....))..))))))))))..)))).))).))))..))..)).)))..)))..)..)))))))).))))))....	148	34.9	-51.4	1	109789	104846	119330	125775	109231	118197	116437	105187	114415	124418	105071	117454	high
24	44	nta-MIR166c-p5	GGAATGCTGTCTGGTTCGAAA	21	NW_015955195.1	-	42969	43073	tctgttgaggGGAATGCTGTCTGGTTCGAAAccattcaccaaagtatgatcaagagtttgattatttgaatgattTCGGACCAGGCTTCATTCCCCccaactcta	1	nta-MIR166c,	nta-MIR166c	tctgttgaggggaatgctgtctggttcgaaaccattcaccaaagtatgatcaagagtttgattatttgaatgattTCGGACCAGGCTTCATTCCCCccaactcta	nta-MIR166c-p5	ggaatgctgtctggttcgaaa	5'	New	gp1a	...((((.((((((((..(((((((((((((.((((((.......((((((((....)))))))).)))))).)))))))))))))..)))))))).))))....	98	42.9	-50.2	1.1	16	15	15	0	24	0	16.9688	15.0488	14.3822	0	23.086	0	middle
24	45	nta-miR166a	TCGGACCAGGCTTCATTCCCC	21	NW_015955195.1	-	42969	43073	tctgttgaggGGAATGCTGTCTGGTTCGAAAccattcaccaaagtatgatcaagagtttgattatttgaatgattTCGGACCAGGCTTCATTCCCCccaactcta	1	nta-MIR166c,	nta-MIR166c	tctgttgaggggaatgctgtctggttcgaaaccattcaccaaagtatgatcaagagtttgattatttgaatgattTCGGACCAGGCTTCATTCCCCccaactcta	nta-miR166a	TCGGACCAGGCTTCATTCCCC	3'	Yes	gp1a	...((((.((((((((..(((((((((((((.((((((.......((((((((....)))))))).)))))).)))))))))))))..)))))))).))))....	98	42.9	-50.2	1.1	109789	104846	119330	125775	109231	118197	116437	105187	114415	124418	105071	117454	high
25	46	nta-MIR166a-p5	GGAATGTTGTCTGGCTCGAGG	21	NW_015867726.1	-	156115	156298	tgttttgaggGGAATGTTGTCTGGCTCGAGGtcactaacttgatccaattatttgaactctctttccctttttgagatgtcatctccattaattaacaaatagatcaatagttcttgattggcattagggatcatggatcatggtttagtgtcgTCGGACCAGGCTTCATTCCCCccaaaattt	1	nta-MIR166a,	nta-MIR166a	tgttttgaggggaatgttgtctggctcgaggtcactaacttgatccaattatttgaactctctttccctttttgagatgtcatctccattaattaacaaatagatcaatagttcttgattggcattagggatcatggatcatggtttagtgtcgTCGGACCAGGCTTCATTCCCCccaaaattt	nta-MIR166a-p5	ggaatgttgtctggctcgagg	5'	New	gp1a	.((((((.((((((((..((((((..(((((.(((((((((((((((......(((..((((...........))))..)))....................((((..((((.((.....)).))))..)))).))))))).)).)))))))).)))..))))))..)))))))).))))))..	181	39.7	-65.2	0.9	493.333	693.933	714.867	490.4	822.8	676.267	523.204	696.19	685.423	485.108	791.463	672.016	middle
25	47	nta-miR166a	TCGGACCAGGCTTCATTCCCC	21	NW_015867726.1	-	156115	156298	tgttttgaggGGAATGTTGTCTGGCTCGAGGtcactaacttgatccaattatttgaactctctttccctttttgagatgtcatctccattaattaacaaatagatcaatagttcttgattggcattagggatcatggatcatggtttagtgtcgTCGGACCAGGCTTCATTCCCCccaaaattt	1	nta-MIR166a,	nta-MIR166a	tgttttgaggggaatgttgtctggctcgaggtcactaacttgatccaattatttgaactctctttccctttttgagatgtcatctccattaattaacaaatagatcaatagttcttgattggcattagggatcatggatcatggtttagtgtcgTCGGACCAGGCTTCATTCCCCccaaaattt	nta-miR166a	TCGGACCAGGCTTCATTCCCC	3'	Yes	gp1a	.((((((.((((((((..((((((..(((((.(((((((((((((((......(((..((((...........))))..)))....................((((..((((.((.....)).))))..)))).))))))).)).)))))))).)))..))))))..)))))))).))))))..	181	39.7	-65.2	0.9	109789	104846	119330	125775	109231	118197	116437	105187	114415	124418	105071	117454	high
26	48	nta-MIR166d-p5	GGAATGTTGTCTGGCTCGAGG	21	NW_015931340.1	+	38121	38312	tgttttgaggGGAATGTTGTCTGGCTCGAGGtcactaacttgatccaatttgaactctctttccctttttgagatgtcatctccattaattagcaaatagatcaatagttcttgattgacattctctattaagagggatcatggatcatggtttagtgtcgTCGGACCAGGCTTCATTCCCCccaaatcttg	1	nta-MIR166d,	nta-MIR166d	tgttttgaggggaatgttgtctggctcgaggtcactaacttgatccaatttgaactctctttccctttttgagatgtcatctccattaattagcaaatagatcaatagttcttgattgacattctctattaagagggatcatggatcatggtttagtgtcgTCGGACCAGGCTTCATTCCCCccaaatcttg	nta-MIR166d-p5	ggaatgttgtctggctcgagg	5'	New	gp1a	...((((.((((((((..((((((..(((((.(((((((((((((((...(((.(((((((.........(((((((((....((..(((((.............)))))..))..))))).))))....))))))).)))))))))).)).)))))))).)))..))))))..)))))))).)))).....	184	40.6	-70.2	0.9	493.333	693.933	714.867	490.4	822.8	676.267	523.204	696.19	685.423	485.108	791.463	672.016	middle
26	49	nta-miR166a	TCGGACCAGGCTTCATTCCCC	21	NW_015931340.1	+	38121	38312	tgttttgaggGGAATGTTGTCTGGCTCGAGGtcactaacttgatccaatttgaactctctttccctttttgagatgtcatctccattaattagcaaatagatcaatagttcttgattgacattctctattaagagggatcatggatcatggtttagtgtcgTCGGACCAGGCTTCATTCCCCccaaatcttg	1	nta-MIR166d,	nta-MIR166d	tgttttgaggggaatgttgtctggctcgaggtcactaacttgatccaatttgaactctctttccctttttgagatgtcatctccattaattagcaaatagatcaatagttcttgattgacattctctattaagagggatcatggatcatggtttagtgtcgTCGGACCAGGCTTCATTCCCCccaaatcttg	nta-miR166a	TCGGACCAGGCTTCATTCCCC	3'	Yes	gp1a	...((((.((((((((..((((((..(((((.(((((((((((((((...(((.(((((((.........(((((((((....((..(((((.............)))))..))..))))).))))....))))))).)))))))))).)).)))))))).)))..))))))..)))))))).)))).....	184	40.6	-70.2	0.9	109789	104846	119330	125775	109231	118197	116437	105187	114415	124418	105071	117454	high
27	50	nta-MIR166g-p5_1ss19TA	AGAATGTTGTCTGGTTCGAGA	21	NW_015885779.1	-	53748	53861	tttgttaaggAGAATGTTGTCTGGTTCGTGAccaatctgtaaacagtaattagctaactgtcaacattcatcacttgaatgatcTCGGACCAGGCTTCATTCCCCtcaactcaa	1	nta-MIR166g,	nta-MIR166g	tttgttaaggagaatgttgtctggttcgtgaccaatctgtaaacagtaattagctaactgtcaacattcatcacttgaatgatcTCGGACCAGGCTTCATTCCCCtcaactcaa	nta-MIR166g-p5	agaatgttgtctggttcgtga	5'	New	gp1a	...(((.(((.(((((..((((((((((.((...........(((((.........)))))...((((((.....)))))).)).))))))))))..))))).))).)))....	107	40.4	-38.7	0.8	12	14	9	9	28	5	12.7266	14.0455	8.62931	8.90287	26.9336	4.96857	middle
27	51	nta-miR166a	TCGGACCAGGCTTCATTCCCC	21	NW_015885779.1	-	53748	53861	tttgttaaggAGAATGTTGTCTGGTTCGTGAccaatctgtaaacagtaattagctaactgtcaacattcatcacttgaatgatcTCGGACCAGGCTTCATTCCCCtcaactcaa	1	nta-MIR166g,	nta-MIR166g	tttgttaaggagaatgttgtctggttcgtgaccaatctgtaaacagtaattagctaactgtcaacattcatcacttgaatgatcTCGGACCAGGCTTCATTCCCCtcaactcaa	nta-miR166a	TCGGACCAGGCTTCATTCCCC	3'	Yes	gp1a	...(((.(((.(((((..((((((((((.((...........(((((.........)))))...((((((.....)))))).)).))))))))))..))))).))).)))....	107	40.4	-38.7	0.8	109789	104846	119330	125775	109231	118197	116437	105187	114415	124418	105071	117454	high
28	52	nta-miR167d	TGAAGCTGCCAGCATGATCTA	21	NW_015942463.1	+	6238	6330	actagtagtTGAAGCTGCCAGCATGATCTAaacttttctagttgctccgttgaggaaagatcaGATCATGTAGCAGCATCACCtgttgatggt	1	nta-MIR167e,	nta-MIR167e	actagtagtTGAAGCTGCCAGCATGATCTAaacttttctagttgctccgttgaggaaagatcagatcatgtagcagcatcacctgttgatggt	nta-miR167d	TGAAGCTGCCAGCATGATCTA	5'	Yes	gp1a	..((..((.(((.(((((..(((((((((...(((((((....((...))..)))))))...))))))))).))))).))).))..)).....	86	43	-30.3	0.8	13770	10729.2	12954.5	12909.5	9255.75	13087.8	14603.8	10764.1	12420.9	12770.2	8903.24	13005.5	high
28	53	nta-MIR167e-p3	GATCATGTAGCAGCATCACC	20	NW_015942463.1	+	6238	6330	actagtagtTGAAGCTGCCAGCATGATCTAaacttttctagttgctccgttgaggaaagatcaGATCATGTAGCAGCATCACCtgttgatggt	1	nta-MIR167e,	nta-MIR167e	actagtagtTGAAGCTGCCAGCATGATCTAaacttttctagttgctccgttgaggaaagatcagatcatgtagcagcatcacctgttgatggt	nta-MIR167e-p3	gatcatgtagcagcatcacc	3'	New	gp1a	..((..((.(((.(((((..(((((((((...(((((((....((...))..)))))))...))))))))).))))).))).))..)).....	86	43	-30.3	0.8	127	243	190	92	283	190	134.69	243.79	182.174	91.0072	272.222	188.806	middle
29	54	nta-miR167d	TGAAGCTGCCAGCATGATCTA	21	NW_015925692.1	+	34513	34612	cactatcagtTGAAGCTGCCAGCATGATCTAaacttacctcttgtaattaattaagtttgagggaagATTAGATCATGTGGTAGCTTCACCcgttagttg	2	nta-MIR167d,stu-MIR167a,	nta-MIR167d	cactatcagtTGAAGCTGCCAGCATGATCTAaacttacctcttgtaataattaagtttgagggaagattagatcatgtggtagcttcacccgttagttg	nta-miR167d	TGAAGCTGCCAGCATGATCTA	5'	Yes	gp1a	.((((.....(((((((((((.((((((((((.(((.((((..................)))).))).))))))))))))))))))))).....))))..	97	39	-41.8	1.1	13770	10729.2	12954.5	12909.5	9255.75	13087.8	14603.8	10764.1	12420.9	12770.2	8903.24	13005.5	high
29	55	nta-MIR167d-p3	ATTAGATCATGTGGTAGCTTCACC	24	NW_015925692.1	+	34513	34612	cactatcagtTGAAGCTGCCAGCATGATCTAaacttacctcttgtaattaattaagtttgagggaagATTAGATCATGTGGTAGCTTCACCcgttagttg	2	nta-MIR167d,stu-MIR167a,	nta-MIR167d	cactatcagtTGAAGCTGCCAGCATGATCTAaacttacctcttgtaataattaagtttgagggaagattagatcatgtggtagcttcacccgttagttg	nta-MIR167d-p3	attagatcatgtggtagcttcacc	3'	New	gp1a	.((((.....(((((((((((.((((((((((.(((.((((..................)))).))).))))))))))))))))))))).....))))..	97	39	-41.8	1.1	435	503	436	431	565	415	461.339	504.636	418.042	426.349	543.482	412.391	middle
30	56	nta-miR167a_L+1R-1	TTGAAGCTGCCAGCATGATCTG	22	NW_015948250.1	-	18494	18720	tttgagaggTTGAAGCTGCCAGCATGATCTGgtacgaacaaagtccatttcttgctatatatatattttcttgcaaagaataatcttgaggtgttttgggtttgaatttagctaagtgatttggaaaagaaattggaattttgcaaagtttttattgaaagagaatataggtagctttcatgggtttggttccatcAGGTCATCTAGCAGCTTCAATcactcaccac	2	nta-MIR167c,nta-MIR167b,	nta-MIR167b	tttgagaggtTGAAGCTGCCAGCATGATCTGGtacgaacaaagtccatttctttgctatatatatattttcttgcaaaagaataatcttgaggtgttttgggttttgaatttagctaagtgatttggaaaagaaattggaattttgcaaagtttttattgaaagagaatataggtagctttcatgggtttggttccatcaggtcatctagcagcttcaatcactcaccac	nta-miR167a	TGAAGCTGCCAGCATGATCTGG	5'	Diff	gp1a	..((((.((((((((((((.((.((((((((((..((((.((..((((.....(((((...(((((((((((.(((..((.((..(((....((((..(.((..((((.........))))..)).......)..))))....)))..))))..))).))))))))))).)))))....))))..)).)))).)))))))))))).)))))))))))).))))....	221	35.7	-72.1	0.9	1807	1800.25	1756.5	1274	1548.75	1696.25	1916.41	1806.1	1684.15	1260.25	1489.77	1685.59	high
30	57	nta-MIR167c-p3	AGGTCATCTAGCAGCTTCAAT	21	NW_015948250.1	-	18494	18720	tttgagaggTTGAAGCTGCCAGCATGATCTGgtacgaacaaagtccatttcttgctatatatatattttcttgcaaagaataatcttgaggtgttttgggtttgaatttagctaagtgatttggaaaagaaattggaattttgcaaagtttttattgaaagagaatataggtagctttcatgggtttggttccatcAGGTCATCTAGCAGCTTCAATcactcaccac	2	nta-MIR167c,nta-MIR167b,	nta-MIR167c	tttgagaggtTGAAGCTGCCAGCATGATCTGGtacgaacaaagtccatttcttgctatatatatattttcttgcaaagaataatcttgaggtgttttgggtttgaatttagctaagtgatttggaaaagaaattggaattttgcaaagtttttattgaaagagaatataggtagctttcatgggtttggttccatcaggtcatctagcagcttcaatcactcaccac	nta-MIR167c-p3	aggtcatctagcagcttcaat	3'	New	gp1a	..((((.((((((((((((.((.((((((((((..((((.((..((((.....(((((...(((((((((((.(((..((.((..(((....((((..(.((..((((.........))))..)).......)..))))....)))..))))..))).))))))))))).)))))....))))..)).)))).)))))))))))).)))))))))))).))))....	221	35.7	-72.1	0.9	203.5	251.5	188	149.5	209.5	157	215.822	252.318	180.257	147.887	201.521	156.013	middle
31	58	nta-miR167a_L+1R-1	TTGAAGCTGCCAGCATGATCTG	22	NW_015889114.1	-	78652	78924	tttgagaggTTGAAGCTGCCAGCATGATCTGgtacgaacaaagtccatttctttctatatataaatattttcttgcaaagaagaaaagaaaagaaagtccattttttcttaaaattttgaggtcttttaatttcctgttttgggtttgaaattgaagtgatattttcgaaaagaaaatggaatttttcgaagttttcttgaaagaaaatataggtatcgtctttcataggtttggttccatcAGGTCATCTAGCAGCTTCAATcactcaccaa	1	nta-MIR167a,	nta-MIR167a	tttgagaggtTGAAGCTGCCAGCATGATCTGGtacgaacaaagtccatttctttctatatataaatattttcttgcaaagaagaaaagaaaagaaagtccattttttcttaaaattttgaggtcttttaatttcctgttttgggtttgaaattgaagtgatattttcgaaaagaaaatggaatttttcgaagttttcttgaaagaaaatataggtatcgtctttcataggtttggttccatcaggtcatctagcagcttcaatcactcaccaa	nta-miR167a	TGAAGCTGCCAGCATGATCTGG	5'	Diff	gp1a	..((((.((((((((((((.((.((((((((((..((((.(((.((............((((..((((((((((...(((((((...(((((.....((((((((((.......((((((((((((((((((((.............)))))))))).)))...)))))))))))))))))..)))))....)))))))..))))))))))..))))...........))))).)))).)))))))))))).)))))))))))).))))....	267	31.9	-81.8	0.9	1807	1800.25	1756.5	1274	1548.75	1696.25	1916.41	1806.1	1684.15	1260.25	1489.77	1685.59	high
31	59	nta-MIR167a-p3	AGGTCATCTAGCAGCTTCAAT	21	NW_015889114.1	-	78652	78924	tttgagaggTTGAAGCTGCCAGCATGATCTGgtacgaacaaagtccatttctttctatatataaatattttcttgcaaagaagaaaagaaaagaaagtccattttttcttaaaattttgaggtcttttaatttcctgttttgggtttgaaattgaagtgatattttcgaaaagaaaatggaatttttcgaagttttcttgaaagaaaatataggtatcgtctttcataggtttggttccatcAGGTCATCTAGCAGCTTCAATcactcaccaa	1	nta-MIR167a,	nta-MIR167a	tttgagaggtTGAAGCTGCCAGCATGATCTGGtacgaacaaagtccatttctttctatatataaatattttcttgcaaagaagaaaagaaaagaaagtccattttttcttaaaattttgaggtcttttaatttcctgttttgggtttgaaattgaagtgatattttcgaaaagaaaatggaatttttcgaagttttcttgaaagaaaatataggtatcgtctttcataggtttggttccatcaggtcatctagcagcttcaatcactcaccaa	nta-MIR167a-p3	aggtcatctagcagcttcaat	3'	New	gp1a	..((((.((((((((((((.((.((((((((((..((((.(((.((............((((..((((((((((...(((((((...(((((.....((((((((((.......((((((((((((((((((((.............)))))))))).)))...)))))))))))))))))..)))))....)))))))..))))))))))..))))...........))))).)))).)))))))))))).)))))))))))).))))....	267	31.9	-81.8	0.9	203.5	251.5	188	149.5	209.5	157	215.822	252.318	180.257	147.887	201.521	156.013	middle
32	60	nta-miR168d	TCGCTTGGTGCAGGTCGGGAA	21	NW_015837819.1	-	19065	19398	ggtctctaatTCGCTTGGTGCAGGTCGGGAActgactcaccggtgacgctgtccgcgccggaatcggtggcgttagtttcgttgatattttgtttgcatttatcgatatttagagagctctctttaggacttatttgttagtaatttgttttgttgaaattaacttgatgtatgtgtagataagtagagagtgtttacccccggttggttaagtaatagatatgaagagagttcatttttttttttgtttttaataaattagttatgtatgaaagtgcgcctcgtctatggcttaagtttgtTCCCGCCTTGCATCAACTGAATcggtgaccgc	1	nta-MIR168e,	nta-MIR168e	ggtctctaatTCGCTTGGTGCAGGTCGGGAActgactcaccggtgacgctgtccgcgccggaatcggtggcgttagtttcgttgatattttgtttgcatttatcgatatttagagagctctctttaggacttatttgttagtaatttgttttgttgaaattaacttgatgtatgtgtagataagtagagagtgtttacccccggttggttaagtaatagatatgaagagagttcattttttttttgtttttaataaattagttatgtatgaaagtgcgcctcgtctatggcttaagtttgttcccgccttgcatcaactgaatcggtgaccgc	nta-miR168d	TCGCTTGGTGCAGGTCGGGAA	5'	Yes	gp1a	((((.(..((((..((((((((((.(((((((..((...((((((.((.....))))))))((((((.((.((.......(((((((...((....))..))))))).........(((((((.....(((((((((...(((....(((..((((....))))..))).)))...))))))))))))))))....))))))))))..(((((..((((((..((((((((......)))))))).....................((((....)))).....))))))..)))))))..))))))).))))))))))..))))..).))))..	332	39.8	-99.6	0.7	2091.4	1708.65	2354.95	2116.4	2398.85	2600.6	2218.03	1714.21	2257.96	2093.56	2307.49	2584.25	high
32	61	nta-MIR168e-p3	TCCCGCCTTGCATCAACTGAAT	22	NW_015837819.1	-	19065	19398	ggtctctaatTCGCTTGGTGCAGGTCGGGAActgactcaccggtgacgctgtccgcgccggaatcggtggcgttagtttcgttgatattttgtttgcatttatcgatatttagagagctctctttaggacttatttgttagtaatttgttttgttgaaattaacttgatgtatgtgtagataagtagagagtgtttacccccggttggttaagtaatagatatgaagagagttcatttttttttttgtttttaataaattagttatgtatgaaagtgcgcctcgtctatggcttaagtttgtTCCCGCCTTGCATCAACTGAATcggtgaccgc	1	nta-MIR168e,	nta-MIR168e	ggtctctaatTCGCTTGGTGCAGGTCGGGAActgactcaccggtgacgctgtccgcgccggaatcggtggcgttagtttcgttgatattttgtttgcatttatcgatatttagagagctctctttaggacttatttgttagtaatttgttttgttgaaattaacttgatgtatgtgtagataagtagagagtgtttacccccggttggttaagtaatagatatgaagagagttcattttttttttgtttttaataaattagttatgtatgaaagtgcgcctcgtctatggcttaagtttgttcccgccttgcatcaactgaatcggtgaccgc	nta-MIR168e-p3	tcccgccttgcatcaactgaat	3'	New	gp1a	((((.(..((((..((((((((((.(((((((..((...((((((.((.....))))))))((((((.((.((.......(((((((...((....))..))))))).........(((((((.....(((((((((...(((....(((..((((....))))..))).)))...))))))))))))))))....))))))))))..(((((..((((((..((((((((......)))))))).....................((((....)))).....))))))..)))))))..))))))).))))))))))..))))..).))))..	332	39.8	-99.6	0.7	716.133	713.433	1211.07	1057.33	1379	1134.47	759.495	715.753	1161.19	1045.92	1326.48	1127.34	middle
33	62	nta-miR168d	TCGCTTGGTGCAGGTCGGGAA	21	NW_015942083.1	-	11160	11517	ggtctctaatTCGCTTGGTGCAGGTCGGGAActgactcgccggtgacgctgtccgcgccggaatcggcgcctttcattgatattttgtttatatgtatcgatatttagagagctctcattaggacttatttgttagtaaaattttgttgttgaaattaacttgatatatgtatagataagtagagtgtttacccctggttggttaagtaatagatatgtagagagtgtttacccacggttggttaagtaatggatatgtagagagttcaatttttttaatagattagttatgaatgaaagtgcgcctcgtcgatggctaagtttgtTCCCGCCTTGCATCAACTGAATtggtgaccgc	1	nta-MIR168d,	nta-MIR168d	ggtctctaatTCGCTTGGTGCAGGTCGGGAActgactcgccggtgacgctgtccgcgccggaatcggcgcctttcattgatattttgtttatatgtatcgatatttagagagctctcattaggacttatttgttagtaaaattttgttgttgaaattaacttgatatatgtatagataagtagagtgtttacccctggttggttaagtaatagatatgtagagagtgtttacccacggttggttaagtaatggatatgtagagagttcaatttttttaatagattagttatgaatgaaagtgcgcctcgtcgatggctaagtttgttcccgccttgcatcaactgaattggtgaccgc	nta-miR168d	TCGCTTGGTGCAGGTCGGGAA	5'	Yes	gp1a	((((.(((((((..((((((((((.(((((((..(((.((((..((((...((((...))))...(((((((((((((.(((....((((((.....((........))((((((((......((((((((((..(((..(((..((((.......))))..))).)))..))))))))))................((..((((..((((..((..(((((.....))))).....))..))))..))))..)).....))))))))..........))))))....))).)))))))).))))).))))..))))..)))..))))))).))))))))))..))))))).))))..	356	39.9	-114.1	0.8	2091.4	1708.65	2354.95	2116.4	2398.85	2600.6	2218.03	1714.21	2257.96	2093.56	2307.49	2584.25	high
33	63	nta-MIR168d-p3	TCCCGCCTTGCATCAACTGAAT	22	NW_015942083.1	-	11160	11517	ggtctctaatTCGCTTGGTGCAGGTCGGGAActgactcgccggtgacgctgtccgcgccggaatcggcgcctttcattgatattttgtttatatgtatcgatatttagagagctctcattaggacttatttgttagtaaaattttgttgttgaaattaacttgatatatgtatagataagtagagtgtttacccctggttggttaagtaatagatatgtagagagtgtttacccacggttggttaagtaatggatatgtagagagttcaatttttttaatagattagttatgaatgaaagtgcgcctcgtcgatggctaagtttgtTCCCGCCTTGCATCAACTGAATtggtgaccgc	1	nta-MIR168d,	nta-MIR168d	ggtctctaatTCGCTTGGTGCAGGTCGGGAActgactcgccggtgacgctgtccgcgccggaatcggcgcctttcattgatattttgtttatatgtatcgatatttagagagctctcattaggacttatttgttagtaaaattttgttgttgaaattaacttgatatatgtatagataagtagagtgtttacccctggttggttaagtaatagatatgtagagagtgtttacccacggttggttaagtaatggatatgtagagagttcaatttttttaatagattagttatgaatgaaagtgcgcctcgtcgatggctaagtttgttcccgccttgcatcaactgaattggtgaccgc	nta-MIR168d-p3	tcccgccttgcatcaactgaat	3'	New	gp1a	((((.(((((((..((((((((((.(((((((..(((.((((..((((...((((...))))...(((((((((((((.(((....((((((.....((........))((((((((......((((((((((..(((..(((..((((.......))))..))).)))..))))))))))................((..((((..((((..((..(((((.....))))).....))..))))..))))..)).....))))))))..........))))))....))).)))))))).))))).))))..))))..)))..))))))).))))))))))..))))))).))))..	356	39.9	-114.1	0.8	716.133	713.433	1211.07	1057.33	1379	1134.47	759.495	715.753	1161.19	1045.92	1326.48	1127.34	middle
34	64	nta-miR168a_R+1	TCGCTTGGTGCAGGTCGGGACC	22	NW_015925321.1	+	17032	17166	ggtctctcatTCGCTTGGTGCAGGTCGGGACCtgcctcgccggcgacaatgatgtcagctgacggtgacggcggcgtaccgataaatatacatgctgtttgggTCCCGCCTTGCATCAACTGAATcggagactgc	1	nta-MIR168c,	nta-MIR168c	ggtctctcatTCGCTTGGTGCAGGTCGGGACctgcctcgccggcgacaatgatgtcagctgacggtgacggcggcgtaccgataaatatacatgctgtttgggtcccgccttgcatcaactgaatcggagactgc	nta-miR168a	TCGCTTGGTGCAGGTCGGGAC	5'	Diff	gp1a	((((((..((((..((((((((((.(((((((((((((((((((((((....)))).))...)))))).))).((((..............)))).....)))))))).))))))))))..))))..))))))..	133	57.8	-63.6	0.8	3842.73	4206.73	3842.2	4158.4	4390.27	4905.93	4075.41	4220.41	3683.95	4113.52	4223.06	4875.09	high
34	65	nta-MIR168c-p3	TCCCGCCTTGCATCAACTGAAT	22	NW_015925321.1	+	17032	17166	ggtctctcatTCGCTTGGTGCAGGTCGGGACCtgcctcgccggcgacaatgatgtcagctgacggtgacggcggcgtaccgataaatatacatgctgtttgggTCCCGCCTTGCATCAACTGAATcggagactgc	1	nta-MIR168c,	nta-MIR168c	ggtctctcatTCGCTTGGTGCAGGTCGGGACctgcctcgccggcgacaatgatgtcagctgacggtgacggcggcgtaccgataaatatacatgctgtttgggtcccgccttgcatcaactgaatcggagactgc	nta-MIR168c-p3	tcccgccttgcatcaactgaat	3'	New	gp1a	((((((..((((..((((((((((.(((((((((((((((((((((((....)))).))...)))))).))).((((..............)))).....)))))))).))))))))))..))))..))))))..	133	57.8	-63.6	0.8	716.133	713.433	1211.07	1057.33	1379	1134.47	759.495	715.753	1161.19	1045.92	1326.48	1127.34	middle
35	66	nta-miR168a	TCGCTTGGTGCAGGTCGGGAC	21	NW_015890946.1	-	11511	11667	tgtctctaatTCGCTTGGTGCAGGTCGGGACtaattcgccggcggcaatcacgtcggcggtgattattctacgaagcttagatgtacgaagttatcaacaatgttcctttgcggcgaaatttgggTCCCGCCTTGCATCAACTGAATtggagactgc	1	nta-MIR168b,	nta-MIR168b	tgtctctaatTCGCTTGGTGCAGGTCGGGACtaattcgccggcggcaatcacgtcggcggtgattattctacgaagcttagatgtacgaagttatcaacaatgttcctttgcggcgaaatttgggtcccgccttgcatcaactgaattggagactgc	nta-miR168a	TCGCTTGGTGCAGGTCGGGAC	5'	Yes	gp1a	.(((((((((((..((((((((((.(((((((...((((((.((((......)))).))))))........((..((..((....(((..(((...)))..)))..))..))..)).......))))))).))))))))))..)))))))))))...	153	49.7	-66.3	0.8	1069.73	1257.48	1335.95	1089.4	1401.52	1022.43	1134.5	1261.57	1280.93	1077.64	1348.14	1016.01	middle
35	67	nta-MIR168b-p3	TCCCGCCTTGCATCAACTGAAT	22	NW_015890946.1	-	11511	11667	tgtctctaatTCGCTTGGTGCAGGTCGGGACtaattcgccggcggcaatcacgtcggcggtgattattctacgaagcttagatgtacgaagttatcaacaatgttcctttgcggcgaaatttgggTCCCGCCTTGCATCAACTGAATtggagactgc	1	nta-MIR168b,	nta-MIR168b	tgtctctaatTCGCTTGGTGCAGGTCGGGACtaattcgccggcggcaatcacgtcggcggtgattattctacgaagcttagatgtacgaagttatcaacaatgttcctttgcggcgaaatttgggtcccgccttgcatcaactgaattggagactgc	nta-MIR168b-p3	tcccgccttgcatcaactgaat	3'	New	gp1a	.(((((((((((..((((((((((.(((((((...((((((.((((......)))).))))))........((..((..((....(((..(((...)))..)))..))..))..)).......))))))).))))))))))..)))))))))))...	153	49.7	-66.3	0.8	716.133	713.433	1211.07	1057.33	1379	1134.47	759.495	715.753	1161.19	1045.92	1326.48	1127.34	middle
36	68	nta-miR168a	TCGCTTGGTGCAGGTCGGGAC	21	NW_015837493.1	-	22560	22727	tgtctctaatTCGCTTGGTGCAGGTCGGGACtaattcgccggtggcggcggcggcaatcacaacggcggtgattgttattaaatggagattagatgtacgaagttatcaacattttttgttttgcggcgaaatttgTCCCGCCTTGCATCAACTGAATtggagactgc	1	nta-MIR168a,	nta-MIR168a	tgtctctaatTCGCTTGGTGCAGGTCGGGACtaattcgccggtggcggcggcggcaatcacaacggcggtgattgttattaaatggagattagatgtacgaagttatcaacattttttgttttgcggcgaaatttgtcccgccttgcatcaactgaattggagactgc	nta-miR168a	TCGCTTGGTGCAGGTCGGGAC	5'	Yes	gp1a	.(((((((((((..((((((((((.((((((...(((((((...((....)).((((((((.......))))))))....(((..((((...((((........)))).....))))..)))..)))))))....)))))).))))))))))..)))))))))))...	164	47.6	-68.8	0.9	1069.73	1257.48	1335.95	1089.4	1401.52	1022.43	1134.5	1261.57	1280.93	1077.64	1348.14	1016.01	middle
36	69	nta-MIR168a-p3	TCCCGCCTTGCATCAACTGAAT	22	NW_015837493.1	-	22560	22727	tgtctctaatTCGCTTGGTGCAGGTCGGGACtaattcgccggtggcggcggcggcaatcacaacggcggtgattgttattaaatggagattagatgtacgaagttatcaacattttttgttttgcggcgaaatttgTCCCGCCTTGCATCAACTGAATtggagactgc	1	nta-MIR168a,	nta-MIR168a	tgtctctaatTCGCTTGGTGCAGGTCGGGACtaattcgccggtggcggcggcggcaatcacaacggcggtgattgttattaaatggagattagatgtacgaagttatcaacattttttgttttgcggcgaaatttgtcccgccttgcatcaactgaattggagactgc	nta-MIR168a-p3	tcccgccttgcatcaactgaat	3'	New	gp1a	.(((((((((((..((((((((((.((((((...(((((((...((....)).((((((((.......))))))))....(((..((((...((((........)))).....))))..)))..)))))))....)))))).))))))))))..)))))))))))...	164	47.6	-68.8	0.9	716.133	713.433	1211.07	1057.33	1379	1134.47	759.495	715.753	1161.19	1045.92	1326.48	1127.34	middle
37	70	nta-MIR169s-p5	TATCGGCAGGTCGTCCTTGGC	21	NW_015944011.1	+	109076	109284	caactTATCGGCAGGTCGTCCTTGGCtacatttcactctcttctgctcatgtaaggctttgtaagacgcatatatagttcgaggtgaagtcagtgattgcgtttcacaaatcacatccagttgaattgctcataatttgtctagagagtcattgcatgaagaggtagggagtggattgCAGCCAAGGATGACTTGCCGggatgttgtag	1	nta-MIR169s,	nta-MIR169s	caacttatcggcaggtcgtccttggctacatttcactctcttctgctcatgtaaggctttgtaagacgcatatatagttcgaggtgaagtcagtgattgcgtttcacaaatcacatccagttgaattgctcataatttgtctagagagtcattgcatgaagaggtagggagtggattgCAGCCAAGGATGACTTGCCGGgatgttgtag	nta-MIR169s-p5	tatcggcaggtcgtccttggc	5'	New	gp1a	((((...((((((((((((((((((((.((.(((((((((((((..((((((((((((((.((.((((..(((.((((((((((((..((..((((.......))))..))..))))...))))))))...)))...)))))).)))))).))))))))..))).)))))))))).)).))))))))))))))))))))...))))...	206	44.5	-92.8	1	7.66667	2	8.33333	15.6667	5.66667	12.1667	8.13088	2.0065	7.99011	15.4976	5.45085	12.0902	middle
37	71	nta-miR169q_R-1_1ss7AG	CAGCCAGGGATGACTTGCCG	20	NW_015944011.1	+	109076	109284	caactTATCGGCAGGTCGTCCTTGGCtacatttcactctcttctgctcatgtaaggctttgtaagacgcatatatagttcgaggtgaagtcagtgattgcgtttcacaaatcacatccagttgaattgctcataatttgtctagagagtcattgcatgaagaggtagggagtggattgCAGCCAAGGATGACTTGCCGggatgttgtag	1	nta-MIR169s,	nta-MIR169s	caacttatcggcaggtcgtccttggctacatttcactctcttctgctcatgtaaggctttgtaagacgcatatatagttcgaggtgaagtcagtgattgcgtttcacaaatcacatccagttgaattgctcataatttgtctagagagtcattgcatgaagaggtagggagtggattgCAGCCAAGGATGACTTGCCGGgatgttgtag	nta-miR169q	CAGCCAAGGATGACTTGCCGG	3'	Diff	gp1a	((((...((((((((((((((((((((.((.(((((((((((((..((((((((((((((.((.((((..(((.((((((((((((..((..((((.......))))..))..))))...))))))))...)))...)))))).)))))).))))))))..))).)))))))))).)).))))))))))))))))))))...))))...	206	44.5	-92.8	1	0	1.57143	2.57143	0.714286	1.71429	4	0	1.57654	2.46552	0.706577	1.649	3.97486	low
38	72	nta-miR169t_R-1_1ss8GT	TAGCCAATGATGACTTGCCT	20	NW_015819056.1	-	15865	15979	ctttgtttagTAGCCAAGGATGACTTGCCTttcatcaatgcatacaaaatgggagcaaaaaccccttttgatggttggaatgcgTGGCAAGCATCTTTGGCGACTtgacgagctc	1	nta-MIR169t,	nta-MIR169t	ctttgtttagTAGCCAAGGATGACTTGCCTTtcatcaatgcatacaaaatgggagcaaaaaccccttttgatggttggaatgcgtggcaagcatctttggcgacttgacgagctc	nta-miR169t	TAGCCAAGGATGACTTGCCTT	5'	Diff	gp1a	.(((((..(((.((((((((((.((((((...(((((((.(((.(((((.(((........))).))))))))))))..)))...)))))))))))))))).)))..)))))...	111	45.2	-45.7	0.9	0	0	14	10	5	18	0	0	13.4234	9.89208	4.80957	17.8868	middle
38	73	nta-MIR169t-p3	TGGCAAGCATCTTTGGCGACT	21	NW_015819056.1	-	15865	15979	ctttgtttagTAGCCAAGGATGACTTGCCTttcatcaatgcatacaaaatgggagcaaaaaccccttttgatggttggaatgcgTGGCAAGCATCTTTGGCGACTtgacgagctc	1	nta-MIR169t,	nta-MIR169t	ctttgtttagTAGCCAAGGATGACTTGCCTTtcatcaatgcatacaaaatgggagcaaaaaccccttttgatggttggaatgcgtggcaagcatctttggcgacttgacgagctc	nta-MIR169t-p3	tggcaagcatctttggcgact	3'	New	gp1a	.(((((..(((.((((((((((.((((((...(((((((.(((.(((((.(((........))).))))))))))))..)))...)))))))))))))))).)))..)))))...	111	45.2	-45.7	0.9	12	6	18	17	6	12	12.7266	6.01951	17.2586	16.8165	5.77149	11.9246	middle
39	74	nta-miR169a_1ss7AG	CAGCCAGGGATGACTTGCCGA	21	NW_015792710.1	-	41137	41227	gagtagattgCAGCCAAGGATGACTTGCCGAgatgttgtagctaatgcaacgactTATCGGCAGGTCGTCCTTGGCtacattttactctct	3	nta-MIR169d,nta-MIR169l,nta-MIR169j,	nta-MIR169j	agtagatttgCAGCCAAGGATGACTTGCCGAgatgttgtagctaatgcaacgacttatcggcaggtcgtccttggctacattttacttctc	nta-miR169a	CAGCCAAGGATGACTTGCCGA	5'	Diff	gp1a	(((((((.((.((((((((((((((((((((...(((((.((....)).)))))...)))))))))))))))))))).)).)))))))...	88	47.3	-59.1	1.4	5.2	9.97143	20.2048	18.381	13.8976	26.6167	5.51486	10.0039	19.3726	18.1826	13.3683	26.4493	middle
39	75	nta-MIR169d-p3	TATCGGCAGGTCGTCCTTGGC	21	NW_015792710.1	-	41137	41227	gagtagattgCAGCCAAGGATGACTTGCCGAgatgttgtagctaatgcaacgactTATCGGCAGGTCGTCCTTGGCtacattttactctct	3	nta-MIR169d,nta-MIR169l,nta-MIR169j,	nta-MIR169d	gagtagattgCAGCCAAGGATGACTTGCCGAgatgttgtagctaatgcaacgacttatcggcaggtcgtccttggctacattttactctct	nta-MIR169d-p3	tatcggcaggtcgtccttggc	3'	New	gp1a	(((((((.((.((((((((((((((((((((...(((((.((....)).)))))...)))))))))))))))))))).)).)))))))...	88	47.3	-59.1	1.4	7.66667	2	8.33333	15.6667	5.66667	12.1667	8.13088	2.0065	7.99011	15.4976	5.45085	12.0902	middle
40	76	nta-MIR169b-p5	TATCGGCAGGTCGTCCTTGGC	21	NW_015792710.1	-	40916	41227	gagtagattgCAGCCAAGGATGACTTGCCGAgatgttgtagctaatgcaacgactTATCGGCAGGTCGTCCTTGGCtacattttactctcttctgctcatgtaagtctctgaaatgcatatatataattcagaggtaaagttatcacacatcacatccagttgaattgctcacaatttgtctagagagtcattgcatgaagaggtagggagtggattgcagccaaggatgacttgccgagatgttgtagccaatgcaatgacttatcggcaggtcgtccttggctacattttactctcttctgctcatgtaa	4	nta-MIR169b,nta-MIR169e,nta-MIR169g,sly-MIR169c,	nta-MIR169b	gagtagattgCAGCCAAGGATGACTTGCCGAgatgttgtagctaatgcaacgacttatcggcaggtcgtccttggctacattttactctcttctgctcatgtaagtctctgaaatgcatatatataattcagaggtaaagttatcacacatcacatccagttgaattgctcacaatttgtctagagagtcattgcatgaagaggtagggagtggattgCAGCCAAGGATGACTTGCCGAgatgttgtagccaatgcaatgacttatcggcaggtcgtccttggctacattttactctct	nta-MIR169b-p5	tatcggcaggtcgtccttggc	5'	New	gp1a	(((((((.((.((((((((((((((((((((...(((((.((....)).)))))...)))))))))))))))))))).)).)))))))......((((.......((((((((.((........)).))))))))....................((.((..((((((....))))))..)).))))))..((((((((..(((.(((((((..(.((.((((((((((((((((((((...((..(.((....)).)..))...)))))))))))))))))))).)).)..))))))))))..))))))))	88	43.3	-143.6	1.1	7.66667	2	8.33333	15.6667	5.66667	12.1667	8.13088	2.0065	7.99011	15.4976	5.45085	12.0902	middle
40	77	nta-miR169b_1ss7AG	CAGCCAGGGATGACTTGCCGA	21	NW_015792710.1	-	40916	41227	gagtagattgCAGCCAAGGATGACTTGCCGAgatgttgtagctaatgcaacgactTATCGGCAGGTCGTCCTTGGCtacattttactctcttctgctcatgtaagtctctgaaatgcatatatataattcagaggtaaagttatcacacatcacatccagttgaattgctcacaatttgtctagagagtcattgcatgaagaggtagggagtggattgcagccaaggatgacttgccgagatgttgtagccaatgcaatgacttatcggcaggtcgtccttggctacattttactctcttctgctcatgtaa	4	nta-MIR169b,nta-MIR169e,nta-MIR169g,sly-MIR169c,	nta-MIR169e	gagtagattgCAGCCAAGGATGACTTGCCGAgatgttgtagctaatgcaacgacttatcggcaggtcgtccttggctacattttactctcttctgctcatgtaagtctctgaaatgcatatatataattcagaggtaaagttatcacacatcacatccagttgaattgctcacaatttgtctagagagtcattgcatgaagaggtagggagtggattgCAGCCAAGGATGACTTGCCGAgatgttgtagccaatgcaatgacttatcggcaggtcgtccttggctacattttactct	nta-miR169b	CAGCCAAGGATGACTTGCCGA	3'	Diff	gp1a	(((((((.((.((((((((((((((((((((...(((((.((....)).)))))...)))))))))))))))))))).)).)))))))......((((.......((((((((.((........)).))))))))....................((.((..((((((....))))))..)).))))))..((((((((..(((.(((((((..(.((.((((((((((((((((((((...((..(.((....)).)..))...)))))))))))))))))))).)).)..))))))))))..))))))))	88	43.3	-143.6	1.1	5.2	9.97143	20.2048	18.381	13.8976	26.6167	5.51486	10.0039	19.3726	18.1826	13.3683	26.4493	middle
41	78	nta-miR169b_1ss7AG	CAGCCAGGGATGACTTGCCGA	21	NW_015944011.1	+	108427	108733	gagtggattgCAGCCAAGGATGACTTGCCGAgatgttgtagccaatgcaacgacttatcggcaggtcgtccttggctacatttcactcttttctgctcatgtaaggctctgtaagacgcatatatagttcgaggtgaagtcagtaattgcgtttcacaaatcatatccagttgaattgatcttaatttgtccaaagagtcattgcatgaagaggtagAGAGTGGATTGCAGCCAAGGAtgacttgccgagatgttgtagctaatgcaacgacttatctgcaggtcgtccttggctacatttagctct	4	nta-MIR169m,nta-MIR169f,nta-MIR169o,nta-MIR169p,	nta-MIR169m	gagtggattgCAGCCAAGGATGACTTGCCGAgatgttgtagccaatgcaacgacttatcggcaggtcgtccttggctacatttcactcttttctgctcatgtaaggctctgtaagacgcatatatagttcgaggtgaagtcagtaattgcgtttcacaaatcatatccagttgaattgatcttaatttgtccaaagagtcattgcatgaagaggtagagagtggattgCAGCCAAGGATGACTTGCCGAgatgttgtagctaatgcaacgacttatctgcaggtcgtccttggctacatttagctct	nta-miR169b	CAGCCAAGGATGACTTGCCGA	5'	Diff	gp1a	((((..(.((.(((((((((((((((((.((...(((((.((....((.(((((...((((((((((((((((((((.((.(((((((((((((..((((((((((((((....((((.......((.((((.(((((....((....))..)))))...(((........))).)))).)).....))))...)))))).))))))))..))).)))))))))).)).))))))))))))))))))))...))))).))....)).)))))...)).))))))))))))))))).)).)..)))).	306	44.3	-144.3	1.1	5.2	9.97143	20.2048	18.381	13.8976	26.6167	5.51486	10.0039	19.3726	18.1826	13.3683	26.4493	middle
41	79	nta-MIR169m-p3_1ss18AG	AGAGTGGATTGCAGCCAGGGA	21	NW_015944011.1	+	108427	108733	gagtggattgCAGCCAAGGATGACTTGCCGAgatgttgtagccaatgcaacgacttatcggcaggtcgtccttggctacatttcactcttttctgctcatgtaaggctctgtaagacgcatatatagttcgaggtgaagtcagtaattgcgtttcacaaatcatatccagttgaattgatcttaatttgtccaaagagtcattgcatgaagaggtagAGAGTGGATTGCAGCCAAGGAtgacttgccgagatgttgtagctaatgcaacgacttatctgcaggtcgtccttggctacatttagctct	4	nta-MIR169m,nta-MIR169f,nta-MIR169o,nta-MIR169p,	nta-MIR169m	gagtggattgCAGCCAAGGATGACTTGCCGAgatgttgtagccaatgcaacgacttatcggcaggtcgtccttggctacatttcactcttttctgctcatgtaaggctctgtaagacgcatatatagttcgaggtgaagtcagtaattgcgtttcacaaatcatatccagttgaattgatcttaatttgtccaaagagtcattgcatgaagaggtagagagtggattgCAGCCAAGGATGACTTGCCGAgatgttgtagctaatgcaacgacttatctgcaggtcgtccttggctacatttagctct	nta-MIR169m-p3	agagtggattgCAGCCAAGGA	3'	New	gp1a	((((..(.((.(((((((((((((((((.((...(((((.((....((.(((((...((((((((((((((((((((.((.(((((((((((((..((((((((((((((....((((.......((.((((.(((((....((....))..)))))...(((........))).)))).)).....))))...)))))).))))))))..))).)))))))))).)).))))))))))))))))))))...))))).))....)).)))))...)).))))))))))))))))).)).)..)))).	306	44.3	-144.3	1.1	0	0	14	7	5	6.28571	0	0	13.4234	6.92446	4.80957	6.2462	middle
42	80	nta-miR169a_1ss7AG	CAGCCAGGGATGACTTGCCGA	21	NW_015792710.1	-	40713	41019	gagtggattgCAGCCAAGGATGACTTGCCGAgatgttgtagccaatgcaatgacttatcggcaggtcgtccttggctacattttactctcttctgctcatgtaaggctctgaaagacatatataattcgaggtgaagtcagtgattgagtttcacaaatcacatccaattgaattgctcatgatttgtctagagagtcattgcaagaaaaggtagggagtggattgcagccaagaatgacttgccgagatgttgtagccaatgcaatgacttattggcaggtcgtccttggctacattttactctct	4	nta-MIR169a,nta-MIR169k,nta-MIR169c,nta-MIR169i,	nta-MIR169c	gagtggattgCAGCCAAGGATGACTTGCCGAgatgttgtagccaatgcaatgacttatcggcaggtcgtccttggctacattttactctcttctgctcatgtaaggctctgaaagacatatataattcgaggtgaagtcagtgattgagtttcacaaatcacatccaattgaattgctcatgatttgtctagagagtcattgcaagaaaaggtagggagtggattgcagccaagaatgacttgccgagatgttgtagccaatgcaatgacttattggcaggtcgtccttggctacattttactctc	nta-miR169a	CAGCCAAGGATGACTTGCCGA	5'	Diff	gp1a	((((..(.((.((((((((((((((((((((...((..(.((....((.(..((...((((((((((((.(((((((.((.(..((((((((((..((.(((((((((((...(((((....((((((((((((..((..((((.......))))..))..))))...)))))))).........)))))..)))))).))))).))..))).)))))))..).)).))))))).))))))))))))...))..).))....)).)..))...)))))))))))))))))))).)).)..))))...	304	43.3	-136.3	1	5.2	9.97143	20.2048	18.381	13.8976	26.6167	5.51486	10.0039	19.3726	18.1826	13.3683	26.4493	middle
43	81	nta-miR169a_1ss7AG	CAGCCAGGGATGACTTGCCGA	21	NW_015944011.1	+	108645	108735	gagtggattgCAGCCAAGGATGACTTGCCGAgatgttgtagctaatgcaacgacttatctgcaggtcgtccttggctacatttagctcttt	1	nta-MIR169h,	nta-MIR169h	gagtggattgCAGCCAAGGATGACTTGCCGAgatgttgtagctaatgcaacgacttatctgcaggtcgtccttggctacatttagctcttt	nta-miR169a	CAGCCAAGGATGACTTGCCGA	5'	Diff	gp1a	((((..(.((.(((((((((((((((((.((...(((((.((....)).)))))...)).))))))))))))))))).)).)..))))...	88	47.3	-49.4	1.1	5.2	9.97143	20.2048	18.381	13.8976	26.6167	5.51486	10.0039	19.3726	18.1826	13.3683	26.4493	middle
44	82	nta-miR169q_R-1_1ss7AG	CAGCCAGGGATGACTTGCCG	20	NW_015944011.1	+	109244	109549	gagtggattgCAGCCAAGGATGACTTGCCGggatgttgtagtcaatgcaacgacttatcggtaggtcgtccttggctacattttactctcttctgctcatgtaaggctctataagatatatatataattcgaggtgaagtcagtaattgtttcacaaattacatccagttgaattgctcataatttgtctagagagtcattgcatgaagaggtagcgagtgaattgcagccaaggagacttgtcaagatgttgcagccaatgcaacgactTATCGGCAGGTCGTCCTTGGCtacatttcactctct	2	nta-MIR169r,nta-MIR169q,	nta-MIR169q	gagtggattgCAGCCAAGGATGACTTGCCGGgatgttgtagtcaatgcaacgacttatcggtaggtcgtccttggctacattttactctcttctgctcatgtaaggctctataagatatatatataattcgaggtgaagtcagtaattgtttcacaaattacatccttttttaattgctcataatttgtctagagagtcattgcatgaaaaagtagcgagtgaattgcagccaaggagacttgtcaagatgttgcagccaatgcaacgacttatcggcaggtcgtccttggctacatttcactctct	nta-miR169q	CAGCCAAGGATGACTTGCCGG	5'	Diff	gp1a	(((((((.((.((((((((((((((((((((..(((((((.....((((((..(((...(..(((((.(((((((((.((.(((((((.(((((..((((((((((((((...(((((..(((.((((((((((.(....).((((((........))))))..))..))))))))...)))...)))))..)))))).))))))))..))).)).))))))).)).))))))))))))))..))))..)))))).....))))))).....)))))))))))))))))))).)).)))))))...	303	42.8	-134.6	1	0	1.57143	2.57143	0.714286	1.71429	4	0	1.57654	2.46552	0.706577	1.649	3.97486	low
44	83	nta-MIR169r-p3	TATCGGCAGGTCGTCCTTGGC	21	NW_015944011.1	+	109244	109549	gagtggattgCAGCCAAGGATGACTTGCCGggatgttgtagtcaatgcaacgacttatcggtaggtcgtccttggctacattttactctcttctgctcatgtaaggctctataagatatatatataattcgaggtgaagtcagtaattgtttcacaaattacatccagttgaattgctcataatttgtctagagagtcattgcatgaagaggtagcgagtgaattgcagccaaggagacttgtcaagatgttgcagccaatgcaacgactTATCGGCAGGTCGTCCTTGGCtacatttcactctct	2	nta-MIR169r,nta-MIR169q,	nta-MIR169r	gagtggattgCAGCCAAGGATGACTTGCCGGgatgttgtagtcaatgcaacgacttatcggtaggtcgtccttggctacattttactctcttctgctcatgtaaggctctataagatatatatataattcgaggtgaagtcagtaattgtttcacaaattacatccagttgaattgctcataatttgtctagagagtcattgcatgaagaggtagcgagtgaattgcagccaaggagacttgtcaagatgttgcagccaatgcaacgacttatcggcaggtcgtccttggctacatttcactctct	nta-MIR169r-p3	tatcggcaggtcgtccttggc	3'	New	gp1a	(((((((.((.((((((((((((((((((((..(((((((.....((((((..(((...(..(((((.(((((((((.((.(((((((.(((((..((((((((((((((...(((((..(((.((((((((((.(....).((((((........))))))..))..))))))))...)))...)))))..)))))).))))))))..))).)).))))))).)).))))))))))))))..))))..)))))).....))))))).....)))))))))))))))))))).)).)))))))...	303	42.8	-134.6	1	7.66667	2	8.33333	15.6667	5.66667	12.1667	8.13088	2.0065	7.99011	15.4976	5.45085	12.0902	middle
45	84	nta-miR171a	TATTGGTGCGGTTCAATGAGA	21	NW_015901968.1	+	12607	12701	atacacgagaTATTGGTGCGGTTCAATGAGAaagcagtactcgacaaattttgactctacttttTGATTGAGCCGTGCCAATATCacgtgtagca	1	nta-MIR171a,	nta-MIR171a	atacacgagaTATTGGTGCGGTTCAATGAGAaagcagtactcgacaaattttgactctacttttTGATTGAGCCGTGCCAATATCacgtgtagca	nta-miR171a	TATTGGTGCGGTTCAATGAGA	5'	Yes	gp1a	.((((((.((((((((..(((((((((.((((((.((...((((......))))..)).)))))).)))))))))..)))))))).))))))...	91	41.1	-47.3	1.2	465	364	537	564	499	427	493.155	365.184	514.882	557.913	479.995	424.316	middle
45	85	nta-miR171c	TGATTGAGCCGTGCCAATATC	21	NW_015901968.1	+	12607	12701	atacacgagaTATTGGTGCGGTTCAATGAGAaagcagtactcgacaaattttgactctacttttTGATTGAGCCGTGCCAATATCacgtgtagca	1	nta-MIR171a,	nta-MIR171a	atacacgagaTATTGGTGCGGTTCAATGAGAaagcagtactcgacaaattttgactctacttttTGATTGAGCCGTGCCAATATCacgtgtagca	nta-miR171c	TGATTGAGCCGTGCCAATATC	3'	Yes	gp1a	.((((((.((((((((..(((((((((.((((((.((...((((......))))..)).)))))).)))))))))..)))))))).))))))...	91	41.1	-47.3	1.2	3733	4479.5	4641.5	4048	5318.5	7426	3959.03	4494.07	4450.33	4004.31	5115.94	7379.32	high
46	86	mtr-miR171e-5p	CGATGTTGGTGAGGTTCAATC	21	NW_015802617.1	+	903	1007	taaaggaagCGATGTTGGTGAGGTTCAATCcgaagacgtgtttacgttttgttttcgtaaaaaacgatctcagaTTGAGCCGCGCCAATATCACTtcctatatat	3	nta-MIR171b,mtr-MIR171e,mes-MIR171f,	mtr-MIR171e	aaagCGATGTTGGTGAGGTTCAATCcgaagacggatttacatgtatagagttgtaaaatacgatctcAGATTGAGCCGCGCCAATATCacttt	mtr-miR171e-5p	CGATGTTGGTGAGGTTCAATC	5'	Yes	gp1a	...((((((.((((((((((.(((((((((.((.(((((.((((((.........))))))..))).)))).))))))))).)))))))))).))))))......	96	40	-48.5	1.2	22	20	32	16	26	26	23.3321	20.065	30.682	15.8273	25.0098	25.8366	middle
46	87	nta-miR171b	TTGAGCCGCGCCAATATCACT	21	NW_015802617.1	+	903	1007	taaaggaagCGATGTTGGTGAGGTTCAATCcgaagacgtgtttacgttttgttttcgtaaaaaacgatctcagaTTGAGCCGCGCCAATATCACTtcctatatat	3	nta-MIR171b,mtr-MIR171e,mes-MIR171f,	nta-MIR171b	taaaggaagcgatgttggtgaggttcaatccgaagacgtgtttacgttttgttttcgtaaaaaacgatctcagaTTGAGCCGCGCCAATATCACTtcctatatat	nta-miR171b	TTGAGCCGCGCCAATATCACT	3'	Yes	gp1a	...((((((.((((((((((.(((((((((.((.(((((.((((((.........))))))..))).)))).))))))))).)))))))))).))))))......	96	40	-48.5	1.2	603.5	455	783	788.5	746.5	847.5	640.041	456.479	750.75	779.991	718.069	842.172	middle
47	88	sly-miR171f	TATTGGCCTGGTTCACTCAGA	21	NW_015828385.1	+	8979	9097	tgaaacagtaactcaggTATTGGCCTGGTTCACTCAGAcaacaagatgaaactatttgaatattgaatggtggagttttggttTGATTGAGCCGTGCCAATATCtcagtttctctttca	2	nta-MIR171c,sly-MIR171a,	sly-MIR171a	tgaaacagtaactttgaTATTGGCCTGGTTCACTCAGAcaacaaaatgtaaactatatttgaatggttgagttttcgtttttcgttTGATTGAGCCGTGCCAATATCtcagtttctctttca	sly-miR171f	TATTGGCCTGGTTCACTCAGA	5'	Yes	gp1a	.((((.((.((((.((((((((((..((((((.((((((..((((((...((((((..(...)..))))))...)))))))))))).))))))..)))))))))).)))).)).)))).	117	38.7	-48.8	1.1	6106	6044	9864	8423	9546	7624	6475.71	6063.65	9457.73	8332.1	9182.44	7576.07	high
47	89	nta-miR171c	TGATTGAGCCGTGCCAATATC	21	NW_015828385.1	+	8979	9097	tgaaacagtaactcaggTATTGGCCTGGTTCACTCAGAcaacaagatgaaactatttgaatattgaatggtggagttttggttTGATTGAGCCGTGCCAATATCtcagtttctctttca	2	nta-MIR171c,sly-MIR171a,	nta-MIR171c	acagtaactcaggtattggcctggttcactcagacaacaagatgaaactatttgaatattgaatggtggagttttggttTGATTGAGCCGTGCCAATATCtcagtttctc	nta-miR171c	TGATTGAGCCGTGCCAATATC	3'	Yes	gp1a	.((((.((.((((.((((((((((..((((((.((((((..((((((...((((((..(...)..))))))...)))))))))))).))))))..)))))))))).)))).)).)))).	117	38.7	-48.8	1.1	3733	4479.5	4641.5	4048	5318.5	7426	3959.03	4494.07	4450.33	4004.31	5115.94	7379.32	high
48	90	nta-miR172c	AGAATCTTGATGATGCTGCAT	21	NW_015797209.1	-	9498	9621	acttgcagctgcagcattatcaagattcacatagaaatcatgtggggcagaaaacataggttctaaaaatctaaccccaagttctttgaacatgAGAATCTTGATGATGCTGCATcagcaaata	1	nta-MIR172g,	nta-MIR172g	acttgcagctgcagcattatcaagattcacatagaaatcatgtggggcagaaaacataggttctaaaaatctaaccccaagttctttgaacatgAGAATCTTGATGATGCTGCATcagcaaata	nta-miR172c	AGAATCTTGATGATGCTGCAT	3'	Yes	gp1a	..((((...(((((((((((((((((((.(((((((......(((((.........((((((.....)))))).)))))..))))......))).)))))))))))))))))))...))))...	119	37.9	-45.1	1	161.19	154.952	151.024	105.333	168.786	140.333	170.95	155.456	144.804	104.197	162.357	139.451	middle
49	91	nta-miR172j_L-1	GAATCTTGATGATGCTGCAT	20	NW_015948031.1	+	9157	9392	gtttgaggatgcatcatcatcaagattcacaaacttgaaaggagaaaggatctacatacgggttaggtcgaacccagtatatttgctcaaatagtgtatttatcttaagaaatttattaaatatgtacatatattaaattttgaaatcatttattacatttgaggtcgttgttctaaaatccaagattctcctaaatttcatatggGAATCTTGATGATGCTGCATcatcaaacat	1	nta-MIR172j,	nta-MIR172j	gtttgaggatgcatcatcatcaagattcacaaacttgaaaggagaaaggatctacatacgggttaggtcgaacccagtatatttgctcaaaatagtgtatttatcttaagaaatttattaaatatgtacatatattaaattttgaaatcatttattacatttgaggtcgttgttctaaaatccaagattctcctaaatttcatatgGGAATCTTGATGATGCTGCATcatcaaacat	nta-miR172j	GGAATCTTGATGATGCTGCAT	3'	Diff	gp1a	((((((.((((((.((((((((((((((.((....(((((((((((.((((....(((((((((......))))).)))).....(((((((.(((............((((((((....((((....))))..))))))))............))))))))))..............))))....)))))))....))))..)).)))))))))))))).)))))).))))))..	234	30.5	-73.1	1	9.85714	6.85714	8.85714	1	8.28571	1	10.454	6.87944	8.49234	0.989208	7.97015	0.993714	middle
50	92	nta-MIR172e-p5	GAATCTTGATGATGCTGCAT	20	NW_015847815.1	+	68088	68436	gtttgcagatgtagcatcatcaagattcacataaaaaacgcatggtgatgagctgatgaaatgacattaatggccaaggcagctttctgaaggtgaGAATCTTGATGATGCTGCATcagcaataaacgactacctgatttatcattatgccattggaacgatacacagataattagcataattcatgtgcaagaatgccacgggtacatggtatggttcaattgatacagtcgttgtttgcgggtgtagcatcatcaagattcacatgaaaaggcaaggtgaaatgaaattaattaagagccatggctttttgaaggtgAGAATCTTGATGATGCTGCATcagcaataa	2	nta-MIR172e,nta-MIR172d,	nta-MIR172e	gtttgcagatgtagcatcatcaagattcacataaaaaacgcatggtgatgagctgatgaaatgacattaatggccaaggcagctttctgaaggtgAGAATCTTGATGATGCTGCATcagcaataaacgactacctgatttatcattatgccattggaacgatacacagataattagcataattcatgtgcaagaatgccacgggtacatggtatggttcaattgatacagtcgttgtttgcgggtgtagcatcatcaagattcacatgaaaaggcaaggtgaaatgaaattaattaagagccatggctttttgaaggtgAGAATCTTGATGATGCTGCATcagcaataa	nta-MIR172e-p5	GAATCTTGATGATGCTGCAT	5'	New	gp1a	..((((.(((((((((((((((((((((.(((..((((.(((((((..(((..((((...((..(((.....(((....((.(((....))).)).(((((((((((((((((((((.((((..(((((((...(((....)))......((...((((.((((.((........(((((.....))))).....((((...))))..)))))).))))...))....)))))))..)))).))))))))))))))))))))).........)))...)))..))...)))).)))...)))))).).))))....))).))))))))))))))))))))).))))...	167	39	-129.4	1	9.85714	6.85714	8.85714	1	8.28571	1	10.454	6.87944	8.49234	0.989208	7.97015	0.993714	middle
50	93	nta-miR172d	AGAATCTTGATGATGCTGCAT	21	NW_015847815.1	+	68088	68436	gtttgcagatgtagcatcatcaagattcacataaaaaacgcatggtgatgagctgatgaaatgacattaatggccaaggcagctttctgaaggtgaGAATCTTGATGATGCTGCATcagcaataaacgactacctgatttatcattatgccattggaacgatacacagataattagcataattcatgtgcaagaatgccacgggtacatggtatggttcaattgatacagtcgttgtttgcgggtgtagcatcatcaagattcacatgaaaaggcaaggtgaaatgaaattaattaagagccatggctttttgaaggtgAGAATCTTGATGATGCTGCATcagcaataa	2	nta-MIR172e,nta-MIR172d,	nta-MIR172e	gtttgcagatgtagcatcatcaagattcacataaaaaacgcatggtgatgagctgatgaaatgacattaatggccaaggcagctttctgaaggtgAGAATCTTGATGATGCTGCATcagcaataaacgactacctgatttatcattatgccattggaacgatacacagataattagcataattcatgtgcaagaatgccacgggtacatggtatggttcaattgatacagtcgttgtttgcgggtgtagcatcatcaagattcacatgaaaaggcaaggtgaaatgaaattaattaagagccatggctttttgaaggtgAGAATCTTGATGATGCTGCATcagcaataa	nta-miR172d	AGAATCTTGATGATGCTGCAT	3'	Yes	gp1a	..((((.(((((((((((((((((((((.(((..((((.(((((((..(((..((((...((..(((.....(((....((.(((....))).)).(((((((((((((((((((((.((((..(((((((...(((....)))......((...((((.((((.((........(((((.....))))).....((((...))))..)))))).))))...))....)))))))..)))).))))))))))))))))))))).........)))...)))..))...)))).)))...)))))).).))))....))).))))))))))))))))))))).))))...	167	39	-129.4	1	161.19	154.952	151.024	105.333	168.786	140.333	170.95	155.456	144.804	104.197	162.357	139.451	middle
51	94	nta-MIR172i-p5	GTAGCATCATCAAGATTCACA	21	NW_015791914.1	-	86043	86151	gtttgcagatGTAGCATCATCAAGATTCACAtattataaaggcatgatgattaacgaccatggcctttttggaggtgAGAATCTTGATGATGCTGCATtagcaataaac	1	nta-MIR172i,	nta-MIR172i	gtttgcagatgtagcatcatcaagattcacatattataaaggcatgatgattaacgaccatggcctttttggaggtgAGAATCTTGATGATGCTGCATtagcaataaac	nta-MIR172i-p5	gtagcatcatcaagattcaca	5'	New	gp1a	..((((..((((((((((((((((((((.(((.....(((((((((............))).))))))......))).))))))))))))))))))))..)))).....	102	37.6	-49.1	1.2	9.13333	9	1	0	4.4	1.4	9.68635	9.02926	0.958813	0	4.23242	1.3912	low
51	95	nta-miR172c	AGAATCTTGATGATGCTGCAT	21	NW_015791914.1	-	86043	86151	gtttgcagatGTAGCATCATCAAGATTCACAtattataaaggcatgatgattaacgaccatggcctttttggaggtgAGAATCTTGATGATGCTGCATtagcaataaac	1	nta-MIR172i,	nta-MIR172i	gtttgcagatgtagcatcatcaagattcacatattataaaggcatgatgattaacgaccatggcctttttggaggtgAGAATCTTGATGATGCTGCATtagcaataaac	nta-miR172c	AGAATCTTGATGATGCTGCAT	3'	Yes	gp1a	..((((..((((((((((((((((((((.(((.....(((((((((............))).))))))......))).))))))))))))))))))))..)))).....	102	37.6	-49.1	1.2	161.19	154.952	151.024	105.333	168.786	140.333	170.95	155.456	144.804	104.197	162.357	139.451	middle
52	96	nta-MIR172c-p5	GTAGCATCATCAAGATTCACA	21	NW_015928095.1	+	21897	22013	gtttgcggatGTAGCATCATCAAGATTCACAtgcaaaacgcatggtgatgaaatgatattaatggccatggcagctttttgaaggtgAGAATCTTGATGATGCTGCATcagcaataa	1	nta-MIR172c,	nta-MIR172c	gtttgcggatgtagcatcatcaagattcacatgcaaaacgcatggtgatgaaatgatattaatggccatggcagctttttgaaggtgAGAATCTTGATGATGCTGCATcagcaataa	nta-MIR172c-p5	gtagcatcatcaagattcaca	5'	New	gp1a	..((((.(((((((((((((((((((((((...(((((.((((((..((............))..))))....)).)))))...))))..))))))))))))))))))).))))...	112	40.2	-49.8	1.1	9.13333	9	1	0	4.4	1.4	9.68635	9.02926	0.958813	0	4.23242	1.3912	low
52	97	nta-miR172c	AGAATCTTGATGATGCTGCAT	21	NW_015928095.1	+	21897	22013	gtttgcggatGTAGCATCATCAAGATTCACAtgcaaaacgcatggtgatgaaatgatattaatggccatggcagctttttgaaggtgAGAATCTTGATGATGCTGCATcagcaataa	1	nta-MIR172c,	nta-MIR172c	gtttgcggatgtagcatcatcaagattcacatgcaaaacgcatggtgatgaaatgatattaatggccatggcagctttttgaaggtgAGAATCTTGATGATGCTGCATcagcaataa	nta-miR172c	AGAATCTTGATGATGCTGCAT	3'	Yes	gp1a	..((((.(((((((((((((((((((((((...(((((.((((((..((............))..))))....)).)))))...))))..))))))))))))))))))).))))...	112	40.2	-49.8	1.1	161.19	154.952	151.024	105.333	168.786	140.333	170.95	155.456	144.804	104.197	162.357	139.451	middle
53	98	nta-MIR172h-p5	GTAGCATCATCAAGATTCACA	21	NW_015847815.1	+	68323	68436	gtttgcgggtGTAGCATCATCAAGATTCACAtgaaaaggcaaggtgaaatgaaattaattaagagccatggctttttgaaggtgAGAATCTTGATGATGCTGCATcagcaataa	1	nta-MIR172h,	nta-MIR172h	gtttgcgggtgtagcatcatcaagattcacatgaaaaggcaaggtgaaatgaaattaattaagagccatggctttttgaaggtgAGAATCTTGATGATGCTGCATcagcaataa	nta-MIR172h-p5	gtagcatcatcaagattcaca	5'	New	gp1a	..((((.(((((((((((((((((((((.(((((((((.((.(((..(((.......)))....))).)).))))))....))).))))))))))))))))))))).))))...	109	38.6	-51.1	1.2	9.13333	9	1	0	4.4	1.4	9.68635	9.02926	0.958813	0	4.23242	1.3912	low
53	99	nta-miR172c	AGAATCTTGATGATGCTGCAT	21	NW_015847815.1	+	68323	68436	gtttgcgggtGTAGCATCATCAAGATTCACAtgaaaaggcaaggtgaaatgaaattaattaagagccatggctttttgaaggtgAGAATCTTGATGATGCTGCATcagcaataa	1	nta-MIR172h,	nta-MIR172h	gtttgcgggtgtagcatcatcaagattcacatgaaaaggcaaggtgaaatgaaattaattaagagccatggctttttgaaggtgAGAATCTTGATGATGCTGCATcagcaataa	nta-miR172c	AGAATCTTGATGATGCTGCAT	3'	Yes	gp1a	..((((.(((((((((((((((((((((.(((((((((.((.(((..(((.......)))....))).)).))))))....))).))))))))))))))))))))).))))...	109	38.6	-51.1	1.2	161.19	154.952	151.024	105.333	168.786	140.333	170.95	155.456	144.804	104.197	162.357	139.451	middle
54	100	nta-miR172c	AGAATCTTGATGATGCTGCAT	21	NW_015847815.1	+	68173	68362	tctgaaggtgAGAATCTTGATGATGCTGCATcagcaataaacgactacctgatttatcattatgccattggaacgatacacagataattagcataattcatgtgcaagaatgccacgggtacatggtatggttcaattgatacagtcgttgtttgcgggtGTAGCATCATCAAGATTCACAtgaaaaggc	1	nta-MIR172f,	nta-MIR172f	tctgaaggtgAGAATCTTGATGATGCTGCATcagcaataaacgactacctgatttatcattatgccattggaacgatacacagataattagcataattcatgtgcaagaatgccacgggtacatggtatggttcaattgatacagtcgttgtttgcgggtgtagcatcatcaagattcacatgaaaaggc	nta-miR172c	AGAATCTTGATGATGCTGCAT	5'	Yes	gp1a	(((....(((.(((((((((((((((((((((.((((..(((((((...(((....)))......((...((((.((((.((........(((((.....))))).....((((...))))..)))))).))))...))....)))))))..)))).))))))))))))))))))))).)))....))).	189	40	-68.8	0.9	161.19	154.952	151.024	105.333	168.786	140.333	170.95	155.456	144.804	104.197	162.357	139.451	middle
54	101	nta-MIR172f-p3	GTAGCATCATCAAGATTCACA	21	NW_015847815.1	+	68173	68362	tctgaaggtgAGAATCTTGATGATGCTGCATcagcaataaacgactacctgatttatcattatgccattggaacgatacacagataattagcataattcatgtgcaagaatgccacgggtacatggtatggttcaattgatacagtcgttgtttgcgggtGTAGCATCATCAAGATTCACAtgaaaaggc	1	nta-MIR172f,	nta-MIR172f	tctgaaggtgAGAATCTTGATGATGCTGCATcagcaataaacgactacctgatttatcattatgccattggaacgatacacagataattagcataattcatgtgcaagaatgccacgggtacatggtatggttcaattgatacagtcgttgtttgcgggtgtagcatcatcaagattcacatgaaaaggc	nta-MIR172f-p3	gtagcatcatcaagattcaca	3'	New	gp1a	(((....(((.(((((((((((((((((((((.((((..(((((((...(((....)))......((...((((.((((.((........(((((.....))))).....((((...))))..)))))).))))...))....)))))))..)))).))))))))))))))))))))).)))....))).	189	40	-68.8	0.9	9.13333	9	1	0	4.4	1.4	9.68635	9.02926	0.958813	0	4.23242	1.3912	low
55	103	nta-miR172a_R-1	AGAATCTTGATGATGCTGCA	20	NW_015886209.1	+	29142	29283	ttttgcagaTGCAGCATCTTCAAGATTCACatatagtatattttatggagttcaattgtgggagaaaaaaattaaattttcttgctccctatggctccttaatttaatatgAGAATCTTGATGATGCTGCAgcagcaatgaa	1	nta-MIR172a,	nta-MIR172a	ttttgcagatgcagcatcttcaagattcacatatagtatattttatggagttcaattgtgggagaaaaaaattaaattttcttgctccctatggctccttaatttaatatgAGAATCTTGATGATGCTGCAGcagcaatgaa	nta-miR172a	AGAATCTTGATGATGCTGCAG	3'	Diff	gp1a	..((((...(((((((((.(((((((((.(((((....((..(((.(((((.((.....(((((.((.(((......))).)).)))))..))))))).)))..))))))).))))))))).)))))))))...))))....	136	33.1	-52.5	1.1	0	1.42857	6	0	0	11	0	1.43322	5.75288	0	0	10.9309	middle
56	104	nta-MIR319a-p5	TTGCTGCCGACTCATTCATCCA	22	NW_015807838.1	+	21026	21214	agttatgaagagagctttcttcggtccacacataggaggtgataaggttcaatTTGCTGCCGACTCATTCATCCAaatgctgaggttagatagtcgaaagcacctcagtagctgaatgaatgaagcgggagtacaagttgagtcttaagtttcctgtgcTTGGACTGAAGGGAGCTCCCtcttacaatc	2	nta-MIR319a,stu-MIR319a,	nta-MIR319a	agttatgaagagagctttcttcggtccacacataggaggtgataaggttcaatttgctgccgactcattcatccaaatgctgaggttagatagtcgaaagcacctcagtagctgaatgaatgaagcgggagtacaagttgagtcttaagtttcctgtgcTTGGACTGAAGGGAGCTCCCTcttacaatc	nta-MIR319a-p5	ttgctgccgactcattcatcca	5'	New	gp1a	.....(((((((((((..((((((((((..(((((((..(..((((..((((((((((.(((..((((((((.((..(((((((((...............)))))))))..)).))))))))..))).))..))))))))..)))).)..)))))))..))))))))))..)))))..)))).))...	181	45	-89.6	1.1	0	36	27	165	13	0	0	36.1171	25.8879	163.219	12.5049	0	middle
56	105	nta-miR319a_R-1	TTGGACTGAAGGGAGCTCCC	20	NW_015807838.1	+	21026	21214	agttatgaagagagctttcttcggtccacacataggaggtgataaggttcaatTTGCTGCCGACTCATTCATCCAaatgctgaggttagatagtcgaaagcacctcagtagctgaatgaatgaagcgggagtacaagttgagtcttaagtttcctgtgcTTGGACTGAAGGGAGCTCCCtcttacaatc	2	nta-MIR319a,stu-MIR319a,	nta-MIR319a	agttatgaagagagctttcttcggtccacacataggaggtgataaggttcaatttgctgccgactcattcatccaaatgctgaggttagatagtcgaaagcacctcagtagctgaatgaatgaagcgggagtacaagttgagtcttaagtttcctgtgcTTGGACTGAAGGGAGCTCCCTcttacaatc	nta-miR319a	TTGGACTGAAGGGAGCTCCCT	3'	Diff	gp1a	.....(((((((((((..((((((((((..(((((((..(..((((..((((((((((.(((..((((((((.((..(((((((((...............)))))))))..)).))))))))..))).))..))))))))..)))).)..)))))))..))))))))))..)))))..)))).))...	181	45	-89.6	1.1	974	1510.5	2380.5	1457	1601	1131.5	1032.97	1515.41	2282.45	1441.28	1540.03	1124.39	high
57	106	nta-MIR319b-p5	AGAGCTTCCTTCAGTCCACTC	21	NW_015948557.1	-	12756	12950	cggtttaagAGAGCTTCCTTCAGTCCACTCataggtggatgaagggatttggattagctgccgactcattcattcaaacacagtagaaatcatatatgtatttctatacgctactgtgaatgtgtgaatgatgcgggaggtaaattcatccctttttatctgtgcTTGGACTGAAGGGAGCTCCCttttgccttt	1	nta-MIR319b,	nta-MIR319b	cggtttaagagagcttccttcagtccactcataggtggatgaaggggatttggatagctgccgactcattcattcaaacacagtagaaaatcatatatgtatttctatacgctactgtgaatgtgtgaatgatgcgggaggtaaattcatccctttttatctgtgcTTGGACTGAAGGGAGCTCCCTtttgccttt	nta-MIR319b-p5	agagcttccttcagtccactc	5'	New	gp1a	.(((..(((.(((((((((((((((((..((((((((...(((((((..(((((((.((.(((..(((((((..((..((((((((..........(((((....)))))))))))))..))..)))))))..))).)).).))))))))))))).))))))))..))))))))))))))))).)))..)))...	191	42.1	-92	1.1	0	0	25	14	7	7	0	0	23.9703	13.8489	6.7334	6.956	middle
57	107	nta-miR319a_R-1	TTGGACTGAAGGGAGCTCCC	20	NW_015948557.1	-	12756	12950	cggtttaagAGAGCTTCCTTCAGTCCACTCataggtggatgaagggatttggattagctgccgactcattcattcaaacacagtagaaatcatatatgtatttctatacgctactgtgaatgtgtgaatgatgcgggaggtaaattcatccctttttatctgtgcTTGGACTGAAGGGAGCTCCCttttgccttt	1	nta-MIR319b,	nta-MIR319b	cggtttaagagagcttccttcagtccactcataggtggatgaaggggatttggatagctgccgactcattcattcaaacacagtagaaaatcatatatgtatttctatacgctactgtgaatgtgtgaatgatgcgggaggtaaattcatccctttttatctgtgcTTGGACTGAAGGGAGCTCCCTtttgccttt	nta-miR319a	TTGGACTGAAGGGAGCTCCCT	3'	Diff	gp1a	.(((..(((.(((((((((((((((((..((((((((...(((((((..(((((((.((.(((..(((((((..((..((((((((..........(((((....)))))))))))))..))..)))))))..))).)).).))))))))))))).))))))))..))))))))))))))))).)))..)))...	191	42.1	-92	1.1	974	1510.5	2380.5	1457	1601	1131.5	1032.97	1515.41	2282.45	1441.28	1540.03	1124.39	high
58	108	nta-miR390b	AAGCTCAGGAGGGATAGCGCC	21	NW_015928966.1	-	8749	8857	gagaatctgtaAAGCTCAGGAGGGATAGCGCCatggatgaatattagtaacactattgcttgttttagccatctgtagCGCTATCCATCCTGAGTTTCAtagcttcttc	2	nta-MIR390c,nta-MIR390b,	nta-MIR390b	agaatctgtaAAGCTCAGGAGGGATAGCGCCatggatgaatattagtaacactattgcttgttttagccatctgtagcgctatccatcctgagtttcatagcttcttc	nta-miR390b	AAGCTCAGGAGGGATAGCGCC	5'	Yes	gp1a	(((((.((((.((((((((((.(((((((((.(..((((..((..(((((.....))))).....))..))))..).))))))))).)))))))))).)))).))))).	108	42.2	-50.3	1.1	425	658	562	395	1245	614	450.733	660.14	538.853	390.737	1197.58	610.14	middle
58	109	nta-MIR390c-p3	CGCTATCCATCCTGAGTTTCA	21	NW_015928966.1	-	8749	8857	gagaatctgtaAAGCTCAGGAGGGATAGCGCCatggatgaatattagtaacactattgcttgttttagccatctgtagCGCTATCCATCCTGAGTTTCAtagcttcttc	2	nta-MIR390c,nta-MIR390b,	nta-MIR390c	gagaatctgtaAAGCTCAGGAGGGATAGCGCCatggatgaatattagtaacactattgcttgttttagccatctgtagcgctatccatcctgagtttcatagcttctt	nta-MIR390c-p3	cgctatccatcctgagtttca	3'	New	gp1a	(((((.((((.((((((((((.(((((((((.(..((((..((..(((((.....))))).....))..))))..).))))))))).)))))))))).)))).))))).	108	42.2	-50.3	1.1	12	9	0	7	12	0	12.7266	9.02926	0	6.92446	11.543	0	middle
59	110	nta-miR390a	AAGCTCAGGAGGGATAGCACC	21	NW_015857886.1	+	61647	61780	gatctgtaAAGCTCAGGAGGGATAGCACCatgaaaaatgatgtgatatatgttggttttaaatttttgaatctttttttttcccaacaaaactttcaattattttggCGCTATCCATCCTGAGTTCTatggctt	23	nta-MIR390a,stu-MIR390,sly-MIR390a,ptc-MIR390b,ptc-MIR390d,gma-MIR390d,gma-MIR390b,ath-MIR390a,ath-MIR390b,lja-MIR390a,aly-MIR390b,aly-MIR390a,csi-MIR390a,lus-MIR390d,lus-MIR390b,lus-MIR390a,lus-MIR390c,cme-MIR390d,bna-MIR390a,bna-MIR390c,cas-MIR390a,cas-MIR390b,rco-MIR390a,	nta-MIR390a	gaaatctgtaAAGCTCAGGAGGGATAGCACCatggagagactatactatcttcatgagcttaaaactgcgatccgttgcgctatccatcctgagtttcatggcttctt	nta-miR390a	AAGCTCAGGAGGGATAGCACC	5'	Yes	gp1a	...(..((.(((((((((.(((((((.(((....(((((((.(((....((((((....(((.............)))....))))))......))))))))))))).))))))).))))))))).))..)...	128	33.6	-42.5	0.9	291	775	653	434	1917	449	308.62	777.52	626.105	429.316	1843.99	446.177	high
60	111	nta-miR390a_R+1	AAGCTCAGGAGGGATAGCACCT	22	NW_015916088.1	-	7453	7609	gtggaaattgcttggaaaatctgtaAAGCTCAGGAGGGATAGCACCAgagagagattatcttaatgagcttaattaacactatttaggctttcttttttgactatcgatctgtagCGCTATCCATCCTGAGTTTTAtggcttcttcatgctgtcttt	12	nta-MIR390a,stu-MIR390,sly-MIR390a,ptc-MIR390d,gma-MIR390d,gma-MIR390b,osa-MIR390,bdi-MIR390a,sbi-MIR390,zma-MIR390b,zma-MIR390a,ata-MIR390,	nta-MIR390a	gaaatctgtaAAGCTCAGGAGGGATAGCACCatggagagactatactatcttcatgagcttaaaactgcgatccgttgcgctatccatcctgagtttcatggcttctt	nta-miR390a	AAGCTCAGGAGGGATAGCACC	5'	Diff	gp1a	..(((....((.((((.((.(..((((((((((((.(((((((..((((..((..(((.......((((((((.((....)).)))))))).......)))...))..))))....))))))).))))))))))))..).)).)))).))..)))..	153	38.2	-53.8	0.9	8.5	9	8	9	22	5.5	9.01467	9.02926	7.6705	8.90287	21.1621	5.46543	middle
61	112	nta-miR390a_R+1	AAGCTCAGGAGGGATAGCACCT	22	NW_015926078.1	+	47183	47325	taAAGCTCAGGAGGGATAGCACCAatgaaaatgatgtgatatatgttggttttttatttttgaatctttcgttttgtttttttttcttctgaatttggttctttcccataaaactatcaattactttggcgctatccatcctg	11	nta-MIR390a,stu-MIR390,sly-MIR390a,gma-MIR390d,gma-MIR390b,osa-MIR390,bdi-MIR390a,sbi-MIR390,zma-MIR390b,zma-MIR390a,ata-MIR390,	nta-MIR390a	gaaatctgtaAAGCTCAGGAGGGATAGCACCatggagagactatactatcttcatgagcttaaaactgcgatccgttgcgctatccatcctgagtttcatggcttctt	nta-miR390a	AAGCTCAGGAGGGATAGCACC	5'	Diff	gp1a	.......(((((.(((((((.(((((....))...(((((...((.(((((((........(((((.((((..................))))...)))))........))))))).)))))))..))).))))))).)))))	136	32.2	-32.1	0.7	8.5	9	8	9	22	5.5	9.01467	9.02926	7.6705	8.90287	21.1621	5.46543	middle
62	113	nta-miR394	TTGGCATTCTGTCCACCTCC	20	NW_015832017.1	-	58461	58548	tagagccattTTGGCATTCTGTCCACCTCCattgctagctccatatctttcaatgaggagggggccagagtgccaaactagctctgca	1	nta-MIR394,	nta-MIR394	tagagccattTTGGCATTCTGTCCACCTCCattgctagctccatatctttcaatgaggagggggccagagtgccaaactagctctgca	nta-miR394	TTGGCATTCTGTCCACCTCC	5'	Yes	gp1a	((((((...(((((((((((((((.(((((((((..((........))..))))..)))))))).))))))))))))...))))))..	86	50	-40.4	0.9	32518	32824	35735	26696	49922	31795	34486.9	32930.7	34263.2	26407.9	48020.7	31595.1	high
63	114	nta-miR395a	CTGAAGTGTTTGGGGGAACTC	21	NW_015914399.1	-	6917	7029	ttcccctagagttctcctgatcacttcattgggacttcaaaaatgcccttaaaatggaaagggtattaattattaatgcctaCTGAAGTGTTTGGGGGAACTCcgggagccac	1	nta-MIR395c,	nta-MIR395c	ttcccctagagttctcctgatcacttcattgggacttcaaaaatgcccttaaaatggaaagggtattaattattaatgcctaCTGAAGTGTTTGGGGGAACTCcgggagccac	nta-miR395a	CTGAAGTGTTTGGGGGAACTC	3'	Yes	gp1a	(((((...(((((((((..(.(((((((.((((........(((((((((........)))))))))...........)))).))))))).)..))))))))).)))))....	109	43.4	-48.5	1	2.5	5	0	4.5	4	0	2.65137	5.01626	0	4.45144	3.84766	0	low
64	115	nta-miR395a	CTGAAGTGTTTGGGGGAACTC	21	NW_015804397.1	-	107793	107904	ttcccctagagttctcctgatcacttcattgggacttgaaaaatgcccttaaattgaaatggtattaattattaatgcctaCTGAACTGTTTGGGGGAACTCtgggagccac	2	nta-MIR395b,nta-MIR395a,	nta-MIR395a	ttccccttgagttctcctgatcacttcattgggacttgaaaaatgccctttaaattgaaatggtattaattattaatgcctaCTGAAGTGTTTGGGGGAACTCtaggagccac	nta-miR395a	CTGAAGTGTTTGGGGGAACTC	3'	Yes	gp1a	....(((((((((((((..(.((.((((..(((..((....))..)))............((((((((...))))))))...)))).)).)..)))))))))))))......	102	41.1	-41.5	0.9	2.5	5	0	4.5	4	0	2.65137	5.01626	0	4.45144	3.84766	0	low
65	116	nta-miR396b	TTCCACAGCTTTCTTGAACTT	21	NW_015869150.1	+	21947	22086	agtcatgcttTTCCACAGCTTTCTTGAACTTcttctagctgaattttgatctctctttaggcaattgtggatagttttaatttgagagatgagatttaaagctctgaaagTCCAAGAAAGCTGTGGGAAAatatggcaat	1	nta-MIR396b,	nta-MIR396b	agtcatgcttTTCCACAGCTTTCTTGAACTTcttctagctgaattttgatctctctttaggcaattgtggatagttttaatttgagagatgagatttaaagctctgaaagtccaagaaagctgtgggaaaatatggcaat	nta-miR396b	TTCCACAGCTTTCTTGAACTT	5'	Yes	gp1a	.(((((..((((((((((((((((((.((((..((.(((((((((((.(((((((.......(((((....))))).......))))))))))))))..))))..)))))).))))))))))))))))))..)))))...	136	35.7	-55.3	1.1	21257	17950.2	23468	17966.5	21513.7	15213.8	22544.1	18008.5	22501.4	17772.6	20694.3	15118.2	high
65	117	nta-MIR396b-p3	TCCAAGAAAGCTGTGGGAAA	20	NW_015869150.1	+	21947	22086	agtcatgcttTTCCACAGCTTTCTTGAACTTcttctagctgaattttgatctctctttaggcaattgtggatagttttaatttgagagatgagatttaaagctctgaaagTCCAAGAAAGCTGTGGGAAAatatggcaat	1	nta-MIR396b,	nta-MIR396b	agtcatgcttTTCCACAGCTTTCTTGAACTTcttctagctgaattttgatctctctttaggcaattgtggatagttttaatttgagagatgagatttaaagctctgaaagtccaagaaagctgtgggaaaatatggcaat	nta-MIR396b-p3	tccaagaaagctgtgggaaa	3'	New	gp1a	.(((((..((((((((((((((((((.((((..((.(((((((((((.(((((((.......(((((....))))).......))))))))))))))..))))..)))))).))))))))))))))))))..)))))...	136	35.7	-55.3	1.1	1174	1207	998	729	1203	941	1245.08	1210.92	956.895	721.133	1157.18	935.085	middle
66	118	nta-miR396a	TTCCACAGCTTTCTTGAACTG	21	NW_015913800.1	-	274976	275114	ctttgtatttTTCCACAGCTTTCTTGAACTGcatatatttgaaaactcacaccatatataaccaattattattattggaggtgaaaataaaataaaaaattgttgcggTTCAATAAGGCTGTGGGAAGAtacagatagt	1	nta-MIR396a,	nta-MIR396a	ctttgtatttTTCCACAGCTTTCTTGAACTGcatatatttgaaaactcacaccatatataaccaattattattattggaggtgaaaataaaataaaaaattgttgcggttcaataaggctgtgggaagatacagatagt	nta-miR396a	TTCCACAGCTTTCTTGAACTG	5'	Yes	gp1a	.(((((((((((((((((((((.((((((((((...((((......((((.(((...((((.......))))...)))..))))............))))...)))))))))).)))))))))))))))))))))....	134	30.2	-50.1	1.2	24218	21295.7	41961	30819	35232.7	62528.3	25684.4	21364.9	40232.7	30486.4	33890.8	62135.3	high
66	119	nta-MIR396a-p3	TTCAATAAGGCTGTGGGAAGA	21	NW_015913800.1	-	274976	275114	ctttgtatttTTCCACAGCTTTCTTGAACTGcatatatttgaaaactcacaccatatataaccaattattattattggaggtgaaaataaaataaaaaattgttgcggTTCAATAAGGCTGTGGGAAGAtacagatagt	1	nta-MIR396a,	nta-MIR396a	ctttgtatttTTCCACAGCTTTCTTGAACTGcatatatttgaaaactcacaccatatataaccaattattattattggaggtgaaaataaaataaaaaattgttgcggttcaataaggctgtgggaagatacagatagt	nta-MIR396a-p3	ttcaataaggctgtgggaaga	3'	New	gp1a	.(((((((((((((((((((((.((((((((((...((((......((((.(((...((((.......))))...)))..))))............))))...)))))))))).)))))))))))))))))))))....	134	30.2	-50.1	1.2	1609	1565	1398	1512	1077	1218	1706.42	1570.09	1340.42	1495.68	1035.98	1210.34	high
67	120	nta-miR396b	TTCCACAGCTTTCTTGAACTT	21	NW_015901146.1	+	33802	33929	tatcatgcttTTCCACAGCTTTCTTGAACTTctttccctctgaattttcatctctagcaattgagttattgatatgagataagattaagctctgaaagTTCAAGAAAGCTGTGGGAAAacatggtgaa	1	nta-MIR396c,	nta-MIR396c	tatcatgcttTTCCACAGCTTTCTTGAACTTctttccctctgaattttcatctctagcaattgagttattgatatgagataagattaagctctgaaagttcaagaaagctgtgggaaaacatggtgaa	nta-miR396b	TTCCACAGCTTTCTTGAACTT	5'	Yes	gp1a	(((((((.(((((((((((((((((((((((.((.....((.((((((.(((((...((((......))))....))))))))))).))....))))))))))))))))))))))))).)))))))..	126	35.2	-52.9	1.2	21257	17950.2	23468	17966.5	21513.7	15213.8	22544.1	18008.5	22501.4	17772.6	20694.3	15118.2	high
67	121	nta-MIR396c-p3	TTCAAGAAAGCTGTGGGAAA	20	NW_015901146.1	+	33802	33929	tatcatgcttTTCCACAGCTTTCTTGAACTTctttccctctgaattttcatctctagcaattgagttattgatatgagataagattaagctctgaaagTTCAAGAAAGCTGTGGGAAAacatggtgaa	1	nta-MIR396c,	nta-MIR396c	tatcatgcttTTCCACAGCTTTCTTGAACTTctttccctctgaattttcatctctagcaattgagttattgatatgagataagattaagctctgaaagttcaagaaagctgtgggaaaacatggtgaa	nta-MIR396c-p3	ttcaagaaagctgtgggaaa	3'	New	gp1a	(((((((.(((((((((((((((((((((((.((.....((.((((((.(((((...((((......))))....))))))))))).))....))))))))))))))))))))))))).)))))))..	126	35.2	-52.9	1.2	139	164	99	76	108	71	147.416	164.533	94.9225	75.1798	103.887	70.5537	middle
68	122	nta-miR397_R+1	ATTGAGTGCAGCGTTGATGTC	21	NW_015929469.1	-	81463	81584	tagaaacatcATTGAGTGCAGCGTTGATGTCaatttctgtgaagtctttaatttggcatttggtctttttgccactttttccaattcgttgTCATCTGCGCTGCACTCAATCAtgtttttag	1	nta-MIR397,	nta-MIR397	tagaaacatcATTGAGTGCAGCGTTGATGTcaatttctgtgaagtctttaatttggcatttggtctttttgccactttttccaattcgttgtcatctgcgctgcactcaatcatgtttttag	nta-miR397	ATTGAGTGCAGCGTTGATGT	5'	Diff	gp1a	(((((((((.(((((((((((((..((((.((((......(((......((..(((((...........)))))..))......))))))).))))..))))))))))))).))))))))).	121	37.7	-48	1	21	9	15	8	30	37	22.2715	9.02926	14.3822	7.91367	28.8574	36.7674	middle
68	123	nta-MIR397-p3	TCATCTGCGCTGCACTCAATCA	22	NW_015929469.1	-	81463	81584	tagaaacatcATTGAGTGCAGCGTTGATGTCaatttctgtgaagtctttaatttggcatttggtctttttgccactttttccaattcgttgTCATCTGCGCTGCACTCAATCAtgtttttag	1	nta-MIR397,	nta-MIR397	tagaaacatcATTGAGTGCAGCGTTGATGTcaatttctgtgaagtctttaatttggcatttggtctttttgccactttttccaattcgttgtcatctgcgctgcactcaatcatgtttttag	nta-MIR397-p3	tcatctgcgctgcactcaatca	3'	New	gp1a	(((((((((.(((((((((((((..((((.((((......(((......((..(((((...........)))))..))......))))))).))))..))))))))))))).))))))))).	121	37.7	-48	1	96	86	83	116	96	107	101.813	86.2796	79.5814	114.748	92.3438	106.327	middle
69	124	nta-MIR398-p5	GGGGCAATCTGAGATCACATG	21	NW_015944888.1	+	26748	26858	tcaacaGGGGCAATCTGAGATCACATGtttggtacttttcttttttctctgtaattgacaagtgtggttcaatatctcaaTATGTGTTCTCAGGTCGCCCCtgtagagcta	1	nta-MIR398,	nta-MIR398	tgtcaacaggggcaatctgagatcacatgttggtacttttcttttttctctgtaaatgacaagtgtggtttcaatatctcaataTGTGTTCTCAGGTCGCCCCTGtagagcta	nta-MIR398-p5	ggggcaatctgagatcacatg	5'	New	gp1a	((.((((((((.((((((((.((((((((...(((((.((..((........))..)).))))).(((.....)))..)))))))).)))))))).)))))))).))....	107	40.5	-41.8	0.9	12	16	7	0	17	14	12.7266	16.052	6.71169	0	16.3525	13.912	middle
69	125	nta-miR398_L+2R-2	TATGTGTTCTCAGGTCGCCCC	21	NW_015944888.1	+	26748	26858	tcaacaGGGGCAATCTGAGATCACATGtttggtacttttcttttttctctgtaattgacaagtgtggttcaatatctcaaTATGTGTTCTCAGGTCGCCCCtgtagagcta	1	nta-MIR398,	nta-MIR398	tgtcaacaggggcaatctgagatcacatgttggtacttttcttttttctctgtaaatgacaagtgtggtttcaatatctcaataTGTGTTCTCAGGTCGCCCCTGtagagcta	nta-miR398	TGTGTTCTCAGGTCGCCCCTG	3'	Diff	gp1a	((.((((((((.((((((((.((((((((...(((((.((..((........))..)).))))).(((.....)))..)))))))).)))))))).)))))))).))....	107	40.5	-41.8	0.9	646	486	294	340	388	488	685.115	487.58	281.891	336.331	373.223	484.932	middle
70	126	nta-miR399a	CGCCAAAGGAGAGCTGCCCTG	21	NW_015877813.1	-	80173	80281	aacagtgatagggctactctctattggcatgcagttatatatgtagtgactccacttcataatataatttagctgacaCGCCAAAGGAGAGCTGCCCTGttactgtctc	1	nta-MIR399b,	nta-MIR399b	aacagtgatagggctactctctattggcatgcagttatatatgtagtgactccacttcataatataatttagctgacaCGCCAAAGGAGAGCTGCCCTGttactgtctc	nta-miR399a	CGCCAAAGGAGAGCTGCCCTG	3'	Yes	gp1a	.(((((((((((((..(((((..(((((.((((((((((((((.((((....)))).))).))))).....)))).)).)))))..)))))..)))))))))))))...	105	42.2	-52.7	1.1	0	0.857143	0	0	1.42857	1.42857	0	0.85993	0	0	1.37416	1.41959	low
71	127	nta-miR399a	CGCCAAAGGAGAGCTGCCCTG	21	NW_015928040.1	-	14176	14283	aacagtggtagggctactctctattggcatgccgttatatgtattgtgactccctcacatataaatttcagctgacaCGCCAAAGGAGAGCTGCCCTGttactgtctc	1	nta-MIR399a,	nta-MIR399a	aacagtggtagggctactctctattggcatgccgttatatgtattgtgactccctcacatataaatttcagctgacaCGCCAAAGGAGAGCTGCCCTGttactgtctc	nta-miR399a	CGCCAAAGGAGAGCTGCCCTG	3'	Yes	gp1a	.(((((..((((((..(((((..(((((.((.((((((.(((((.((((.....))))))))).))...))).).)).)))))..)))))..))))))..)))))...	104	46.3	-43.1	0.9	0	0.857143	0	0	1.42857	1.42857	0	0.85993	0	0	1.37416	1.41959	low
72	128	nta-miR399a	CGCCAAAGGAGAGCTGCCCTG	21	NW_015911297.1	+	40139	40253	aatagtgatagggctactctctattggcatgcacttatatatgtatagtgactcaacttgatatcataacatattcagctgacaCGCCAAAGGAGAGCTGCCCTGttactgtctc	1	nta-MIR399c,	nta-MIR399c	aatagtgatagggctactctctattggcatgcacttatatatgtatagtgactcaacttgatatcataacatattcagctgacaCGCCAAAGGAGAGCTGCCCTGttactgtctc	nta-miR399a	CGCCAAAGGAGAGCTGCCCTG	3'	Yes	gp1a	.(((((((((((((..(((((..(((((.((((((...((((((...((((.((.....))..)))).))))))..)).)).)).)))))..)))))..)))))))))))))...	111	40.9	-46.2	1	0	0.857143	0	0	1.42857	1.42857	0	0.85993	0	0	1.37416	1.41959	low
73	129	nta-miR399a	CGCCAAAGGAGAGCTGCCCTG	21	NW_015795368.1	-	3057	3146	aatagtgatagggctactctctattggcatgcagttaattatatgtatttcagctgacaCGCCAAAGGAGAGCTGCCCTGttactgtctc	7	nta-MIR399g,stu-MIR399k,stu-MIR399o,stu-MIR399n,stu-MIR399l,stu-MIR399m,sly-MIR399b,	nta-MIR399g	aatagtgatagggctactctctattggcatgcagttaattatatgtatttcagctgacaCGCCAAAGGAGAGCTGCCCTGttactgtctc	nta-miR399a	CGCCAAAGGAGAGCTGCCCTG	3'	Yes	gp1a	.(((((((((((((..(((((..(((((.(((((((((.((....)).)).))))).)).)))))..)))))..)))))))))))))...	86	43.3	-43.2	1.1	0	0.857143	0	0	1.42857	1.42857	0	0.85993	0	0	1.37416	1.41959	low
74	130	nta-miR399a	CGCCAAAGGAGAGCTGCCCTG	21	NW_015885956.1	+	3805	3922	aatagtggtagggctactctctattggcatgcacttaattatgtatagtgattccacttaatcatcacatatatacttcagttgacaCGCCAAAGGAGAGCTGCCCTGttactatctc	1	nta-MIR399d,	nta-MIR399d	aatagtggtagggctactctctattggcatgcacttaattatgtatagtgattccacttaatcatcacatatatacttcagttgacaCGCCAAAGGAGAGCTGCCCTGttactatctc	nta-miR399a	CGCCAAAGGAGAGCTGCCCTG	3'	Yes	gp1a	.(((((..((((((..(((((..(((((.((((((.((.(((((((.(((((...........)))))))))))).)).))).).)).)))))..)))))..))))))..)))))...	114	39.8	-46.8	1	0	0.857143	0	0	1.42857	1.42857	0	0.85993	0	0	1.37416	1.41959	low
75	131	nta-miR399a	CGCCAAAGGAGAGCTGCCCTG	21	NW_015937687.1	+	70193	70309	aatagtggtagggctactctctattggcatgcagttaattatgtatactgactcttaatcatcgcacatatatatttcagctgacaCGCCAAAGGAGAGCTGCCCTGttactgtctc	1	nta-MIR399f,	nta-MIR399f	aatagtggtagggctactctctattggcatgcagttaattatgtatactgactcttaatcatcgcacatatatatttcagctgacaCGCCAAAGGAGAGCTGCCCTGttactgtctc	nta-miR399a	CGCCAAAGGAGAGCTGCCCTG	3'	Yes	gp1a	.(((((..((((((..(((((..(((((.(((((((((.(((((((..(((..........)))...))))))).)).))))).)).)))))..)))))..))))))..)))))...	113	41.9	-45.3	0.9	0	0.857143	0	0	1.42857	1.42857	0	0.85993	0	0	1.37416	1.41959	low
76	132	nta-miR399a	CGCCAAAGGAGAGCTGCCCTG	21	NW_015878004.1	+	44559	44673	aatagtggtagggctactctctattggcatgcagttatttatgtagagtgactccacttcataacctatatatttcagctgacaCGCCAAAGGAGAGCTGCCCTGttactgtctc	1	nta-MIR399e,	nta-MIR399e	aatagtggtagggctactctctattggcatgcagttatttatgtagagtgactccacttcataacctatatatttcagctgacaCGCCAAAGGAGAGCTGCCCTGttactgtctc	nta-miR399a	CGCCAAAGGAGAGCTGCCCTG	3'	Yes	gp1a	.(((((..((((((..(((((..(((((.(((((((...(((((((((((....)))).......)))))))....))))).)).)))))..)))))..))))))..)))))...	111	43.5	-49.2	1	0	0.857143	0	0	1.42857	1.42857	0	0.85993	0	0	1.37416	1.41959	low
77	133	nta-MIR408-p5	ACAGGGACGAGGTAGAGCATG	21	NW_015921398.1	+	53482	53572	gagaggatagACAGGGACGAGGTAGAGCATGagatgtgcaatttttgcttgcccattctaTGCACTGCCTCTTCCCTGGCTctcctccctc	2	nta-MIR408,sly-MIR408,	nta-MIR408	gagaggatagacagggacgaggtagagcatgagatgtgcaatttttgcttgcccattctaTGCACTGCCTCTTCCCTGGCTctcctccctc	nta-MIR408-p5	acagggacgaggtagagcatg	5'	New	gp1a	..(((((.((.((((((.(((((((.(((((..(((.((((.......)))).)))..))))).))))))).)))))).)).)))))....	85	52.7	-47.6	1	155	102	70	56	87	129	164.385	102.332	67.1169	55.3957	83.6866	128.189	middle
77	134	nta-miR408	TGCACTGCCTCTTCCCTGGCT	21	NW_015921398.1	+	53482	53572	gagaggatagACAGGGACGAGGTAGAGCATGagatgtgcaatttttgcttgcccattctaTGCACTGCCTCTTCCCTGGCTctcctccctc	2	nta-MIR408,sly-MIR408,	nta-MIR408	gagaggatagacagggacgaggtagagcatgagatgtgcaatttttgcttgcccattctaTGCACTGCCTCTTCCCTGGCTctcctccctc	nta-miR408	TGCACTGCCTCTTCCCTGGCT	3'	Yes	gp1a	..(((((.((.((((((.(((((((.(((((..(((.((((.......)))).)))..))))).))))))).)))))).)).)))))....	85	52.7	-47.6	1	1715	1421	889	802	1087	1275	1818.84	1425.62	852.384	793.345	1045.6	1266.99	high
78	135	nta-miR477a	ACTCTCCCTCAAGGGCTTCTG	21	NW_015923011.1	-	22573	22673	gtctttgttcACTCTCCCTCAAGGGCTTCTGgcttaaaatgccttactctttggtttgtgttagtgccaGAGGTCTTTCGAGTGAGAGTGGataaattctg	1	nta-MIR477a,	nta-MIR477a	gtctttgttcACTCTCCCTCAAGGGCTTCTGgcttaaaatgccttactctttggtttgtgttagtgccagaggtctttcgagtgagagtggataaattctg	nta-miR477a	ACTCTCCCTCAAGGGCTTCTG	5'	Yes	gp1a	...(((((((((((((.((((((((((((((((((((...(((.........))).....)))).))))))))))))).))).))))))))))))).....	93	44.6	-46.1	1	0	0	10	80	5	0	0	0	9.58813	79.1367	4.80957	0	middle
78	136	nta-MIR477a-p3	GAGGTCTTTCGAGTGAGAGTGG	22	NW_015923011.1	-	22573	22673	gtctttgttcACTCTCCCTCAAGGGCTTCTGgcttaaaatgccttactctttggtttgtgttagtgccaGAGGTCTTTCGAGTGAGAGTGGataaattctg	1	nta-MIR477a,	nta-MIR477a	gtctttgttcACTCTCCCTCAAGGGCTTCTGgcttaaaatgccttactctttggtttgtgttagtgccagaggtctttcgagtgagagtggataaattctg	nta-MIR477a-p3	gaggtctttcgagtgagagtgg	3'	New	gp1a	...(((((((((((((.((((((((((((((((((((...(((.........))).....)))).))))))))))))).))).))))))))))))).....	93	44.6	-46.1	1	0	0	0	9	6	0	0	0	0	8.90287	5.77149	0	low
79	137	nta-miR479a	CGTGATATTGGTTTGGCTCATC	22	NW_015900350.1	-	16039	16137	tcagacatggCGTGATATTGGTTTGGCTCATCactttctgttgaattcatgagacagtctagagatgaTGAGCCGGACCAATATCACTCttgtatgctt	1	nta-MIR479a,	nta-MIR479a	tcagacatggCGTGATATTGGTTTGGCTCATCactttctgttgaattcatgagacagtctagagatgatgagccggaccaatatcactcttgtatgctt	nta-miR479a	CGTGATATTGGTTTGGCTCATC	5'	Yes	gp1a	.((.(((.((.(((((((((((..((((((((((((((((((..........)))))...)))).)))))))))..))))))))))).))))).))...	95	42.4	-44.4	1.1	6	0	0	0	7	0	6.36329	0	0	0	6.7334	0	low
79	138	nta-MIR479a-p3	TGAGCCGGACCAATATCACTC	21	NW_015900350.1	-	16039	16137	tcagacatggCGTGATATTGGTTTGGCTCATCactttctgttgaattcatgagacagtctagagatgaTGAGCCGGACCAATATCACTCttgtatgctt	1	nta-MIR479a,	nta-MIR479a	tcagacatggCGTGATATTGGTTTGGCTCATCactttctgttgaattcatgagacagtctagagatgatgagccggaccaatatcactcttgtatgctt	nta-MIR479a-p3	tgagccggaccaatatcactc	3'	New	gp1a	.((.(((.((.(((((((((((..((((((((((((((((((..........)))))...)))).)))))))))..))))))))))).))))).))...	95	42.4	-44.4	1.1	116	110	247	99	124	115	123.024	110.358	236.827	97.9316	119.277	114.277	middle
80	139	nta-miR479b	CGTGATATTTGTTTGGCTCATC	22	NW_015833080.1	-	116131	116229	tcagacatggCGTGATATTTGTTTGGCTCATCactttctgttgaattcatgagacagtccagagatgaTGAGCCGAACCAATATCACTCttgtatgctt	1	nta-MIR479b,	nta-MIR479b	tcagacatggCGTGATATTTGTTTGGCTCATCactttctgttgaattcatgagacagtccagagatgatgagccgaaccaatatcactcttgtatgctt	nta-miR479b	CGTGATATTTGTTTGGCTCATC	5'	Yes	gp1a	.((.(((.((.((((((((.(((((((((((((.((((((..((..((....))...))))))))))))))))))))).)))))))).))))).))...	95	41.4	-39.9	1	0	0	8	9	0	7	0	0	7.6705	8.90287	0	6.956	low
80	140	nta-MIR479b-p3	TGAGCCGAACCAATATCACTC	21	NW_015833080.1	-	116131	116229	tcagacatggCGTGATATTTGTTTGGCTCATCactttctgttgaattcatgagacagtccagagatgaTGAGCCGAACCAATATCACTCttgtatgctt	1	nta-MIR479b,	nta-MIR479b	tcagacatggCGTGATATTTGTTTGGCTCATCactttctgttgaattcatgagacagtccagagatgatgagccgaaccaatatcactcttgtatgctt	nta-MIR479b-p3	tgagccgaaccaatatcactc	3'	New	gp1a	.((.(((.((.((((((((.(((((((((((((.((((((..((..((....))...))))))))))))))))))))).)))))))).))))).))...	95	41.4	-39.9	1	25	20	35	17	26	36	26.5137	20.065	33.5584	16.8165	25.0098	35.7737	middle
81	141	nta-MIR482a-p5	GGGATTGGTGGGTTGGAAAGC	21	NW_015862613.1	+	1125	1228	agtttatccggaaaactacgGGGATTGGTGGGTTGGAAAGCttttcacttctgattaaacgcTTTCCAATTCCACCCATTCCTAtggtttttcaataatctctc	1	nta-MIR482a,	nta-MIR482a	agtttatccggaaaactacggggattggtgggttggaaagcttttcacttctgattaaacgcTTTCCAATTCCACCCATTCCTAtggtttttcaataatctctc	nta-MIR482a-p5	gggattggtgggttggaaagc	5'	New	gp1a	.........(((((((((..(((((.(((((((((((((((((((((....)))..))).)))))))))).))))).)))))..)))))))))...........	84	40.4	-40.9	1	9.5	13	15	165	67.5	68	10.0752	13.0423	14.3822	163.219	64.9292	67.5725	middle
81	142	nta-miR482a	TTTCCAATTCCACCCATTCCTA	22	NW_015862613.1	+	1125	1228	agtttatccggaaaactacgGGGATTGGTGGGTTGGAAAGCttttcacttctgattaaacgcTTTCCAATTCCACCCATTCCTAtggtttttcaataatctctc	1	nta-MIR482a,	nta-MIR482a	agtttatccggaaaactacggggattggtgggttggaaagcttttcacttctgattaaacgcTTTCCAATTCCACCCATTCCTAtggtttttcaataatctctc	nta-miR482a	TTTCCAATTCCACCCATTCCTA	3'	Yes	gp1a	.........(((((((((..(((((.(((((((((((((((((((((....)))..))).)))))))))).))))).)))))..)))))))))...........	84	40.4	-40.9	1	3421.5	3575.5	7982.5	10736.5	4155.5	5978	3628.67	3587.13	7653.72	10620.6	3997.24	5940.42	high
82	143	nta-MIR482c-p5	GGGATTGGTGGGTTGGAAAGC	21	NW_015882674.1	+	6142	6229	gaaaactatgGGGATTGGTGGGTTGGAAAGCttttcccttctgattgattaaacgcTTTCCAATTCCACCCATTCCTAtggtttttca	1	nta-MIR482c,	nta-MIR482c	gaaaactatggggattggtgggttggaaagcttttcccttctgattgattaaacgcTTTCCAATTCCACCCATTCCTAtggtttttca	nta-MIR482c-p5	gggattggtgggttggaaagc	5'	New	gp1a	(((((((((((((((.(((((((((((((((.(((....((.....))..))).))))))))).)))))).)))))))))))))))..	86	40.9	-41	1.1	9.5	13	15	165	67.5	68	10.0752	13.0423	14.3822	163.219	64.9292	67.5725	middle
82	144	nta-miR482a	TTTCCAATTCCACCCATTCCTA	22	NW_015882674.1	+	6142	6229	gaaaactatgGGGATTGGTGGGTTGGAAAGCttttcccttctgattgattaaacgcTTTCCAATTCCACCCATTCCTAtggtttttca	1	nta-MIR482c,	nta-MIR482c	gaaaactatggggattggtgggttggaaagcttttcccttctgattgattaaacgcTTTCCAATTCCACCCATTCCTAtggtttttca	nta-miR482a	TTTCCAATTCCACCCATTCCTA	3'	Yes	gp1a	(((((((((((((((.(((((((((((((((.(((....((.....))..))).))))))))).)))))).)))))))))))))))..	86	40.9	-41	1.1	3421.5	3575.5	7982.5	10736.5	4155.5	5978	3628.67	3587.13	7653.72	10620.6	3997.24	5940.42	high
83	145	nta-miR482d	TTCCCGACTCCCCCCATACCAC	22	NW_015794175.1	+	37141	37240	gggagctgttggggtggggggcgtgggaagatgtcatctttacttttcctgcgaaggagattggcatcTTCCCGACTCCCCCCATACCACtggcttccaa	1	nta-MIR482d,	nta-MIR482d	gggagctgttggggtggggggcgtgggaagatgtcatctttacttttcctgcgaaggagattggcatcTTCCCGACTCCCCCCATACCACtggcttccaa	nta-miR482d	TTCCCGACTCCCCCCATACCAC	3'	Yes	gp1a	(((((((..(((..(((((((.((((((((((((((((((..((((......)))))))).)))))))))))).)).)))))))..)))..)))))))..	98	57	-61	1.1	12759	15655	19014	22914	15055	19261	13531.5	15705.9	18230.9	22666.7	14481.6	19139.9	high
84	146	nta-miR482b-5p	AGTGGGTGGAGTGGTAAGATA	21	NW_015799971.1	-	3723	3836	gtgtttaagggagcttttggAGTGGGTGGAGTGGTAAGATAtcatatttatgttgaatcataataattgaaaTCTTGCCAATGCCATCCATTCCtatggcttccaatcatttct	1	nta-MIR482b,	nta-MIR482b	gtgtttaagggagcttttggAGTGGGTGGAGTGGTAAGATAtcatatttatgttgaatcataataattgaaaTCTTGCCAATGCCATCCATTCCtatggcttccaatcatttct	nta-miR482b-5p	AGTGGGTGGAGTGGTAAGATA	5'	Yes	gp1a	........(((((((...(((((((((((..(((((((((.(((...(((((......)))))....))).)))))))))...)))))))))))...)))))))..........	96	36.8	-51.7	1.2	22	21	27	24	25	16	23.3321	21.0683	25.8879	23.741	24.0479	15.8994	middle
84	147	nta-miR482b-3p	TCTTGCCAATGCCATCCATTCC	22	NW_015799971.1	-	3723	3836	gtgtttaagggagcttttggAGTGGGTGGAGTGGTAAGATAtcatatttatgttgaatcataataattgaaaTCTTGCCAATGCCATCCATTCCtatggcttccaatcatttct	1	nta-MIR482b,	nta-MIR482b	gtgtttaagggagcttttggAGTGGGTGGAGTGGTAAGATAtcatatttatgttgaatcataataattgaaaTCTTGCCAATGCCATCCATTCCtatggcttccaatcatttct	nta-miR482b-3p	TCTTGCCAATGCCATCCATTCC	3'	Yes	gp1a	........(((((((...(((((((((((..(((((((((.(((...(((((......)))))....))).)))))))))...)))))))))))...)))))))..........	96	36.8	-51.7	1.2	4504	4901	6403	5634	4894	6554	4776.71	4916.94	6139.28	5573.2	4707.61	6512.8	high
85	148	nta-MIR827-p5	TTTGTTGATGGTCATCTATTC	21	NW_015923608.1	-	24683	24781	tatgaatttgTTTGTTGATGGTCATCTATTCatcattctgcatagtttttgcacccattatcctatggTTAGATGAACATCAACAAACAtcttcatcac	2	nta-MIR827,sly-MIR827,	nta-MIR827	tatgaatttgtttgttgatggtcatctattcatcattctgcatagtttttgcacccattatcctatggTTAGATGAACATCAACAAACAtcttcatcac	nta-MIR827-p5	tttgttgatggtcatctattc	5'	New	gp1a	.(((((..((((((((((((.(((((((..........((((.......)))).((((......)))).))))))).))))))))))))..)))))...	95	33.3	-35.4	1.1	29	36	15	6	58	8	30.7559	36.1171	14.3822	5.93525	55.7911	7.94971	middle
85	149	nta-miR827	TTAGATGAACATCAACAAACA	21	NW_015923608.1	-	24683	24781	tatgaatttgTTTGTTGATGGTCATCTATTCatcattctgcatagtttttgcacccattatcctatggTTAGATGAACATCAACAAACAtcttcatcac	2	nta-MIR827,sly-MIR827,	nta-MIR827	tatgaatttgtttgttgatggtcatctattcatcattctgcatagtttttgcacccattatcctatggTTAGATGAACATCAACAAACAtcttcatcac	nta-miR827	TTAGATGAACATCAACAAACA	3'	Yes	gp1a	.(((((..((((((((((((.(((((((..........((((.......)))).((((......)))).))))))).))))))))))))..)))))...	95	33.3	-35.4	1.1	283	452	166	138	750	144	300.135	453.47	159.163	136.511	721.436	143.095	middle
86	150	nta-miR1446	TGAACTCTCTCCCTCAATGGCT	22	NW_015889183.1	+	133652	133758	cagcgttttcTGAACTCTCTCCCTCAATGGCTgctcatatatatatagccatgcttcttaattaattaaagaacagccatgagagattgagttcagaaaactctggc	1	nta-MIR1446,	nta-MIR1446	cagcgttttcTGAACTCTCTCCCTCAATGGCTgctcatatatatatagccatgcttcttaattaattaaagaacagccatgagagattgagttcagaaaactctggc	nta-miR1446	TGAACTCTCTCCCTCAATGGCT	5'	Yes	gp1a	(((.(((((((((((((..((.((((.((((((.((..........(((...)))..((((....)))).)).)))))))))).))..))))))))))))).)))..	105	39.3	-41.6	1	11	24	35	51	28	62	11.666	24.078	33.5584	50.4496	26.9336	61.6103	middle
87	151	nta-miR1919	GAGCGAGTCATCTGTGACAGG	21	NW_015804131.1	-	151094	151281	atcgaatcgttccgacgcctttgatgttcagatcttccggtgctccTGTCGCAGATGACTTTCGCCCTTctctacaacgacccttcgaatcaaatattttggaaggtttttagtgtgataaGTGCGAGTCATCTGTGACAGGataatggaagatctagttatcaaaggcttattggggcgttttcatc	4	nta-MIR1919,stu-MIR1919,sly-MIR1919b,sly-MIR1919c,	nta-MIR1919	ccggtgctcctgtcgcagatgactttcgcccttctctacaacgacccttcatcaatttacaatgaagaaatcaaataattcagtgtttttctacttggagggtttttagtgtgacaaGAGCGAGTCATCTGTGACAGGataatggaag	nta-miR1919	GAGCGAGTCATCTGTGACAGG	3'	Yes	gp1a	...(((.((..((((.((((((((((...((((((((((....((((((((((((((((..((((.(((.(((((((..(((.((((((........)))))).)))..)).))).)).))).))))))))))))))))))))...))))))))))...))))))))))...))))..))..)))...	182	44.1	-89.3	1.1	96.5	193.5	114	105.5	305	162	102.343	194.129	109.305	104.361	293.384	160.982	middle
88	152	nta-miR1919	GAGCGAGTCATCTGTGACAGG	21	NW_015883078.1	+	14608	14764	tcttccgatgctccTGTCGCAGATGACTTTCGCCCTTctctacaacgacccttcatattccctcctttctcaaatctaaatttttacacatagaaatcaaatattttggtgggtgtttagtgtgataaGGGCGAGTCATCTGTGACAGGatgaagga	4	nta-MIR1919,stu-MIR1919,sly-MIR1919b,sly-MIR1919c,	nta-MIR1919	ccggtgctcctgtcgcagatgactttcgcccttctctacaacgacccttcatcaatttacaatgaagaaatcaaataattcagtgtttttctacttggagggtttttagtgtgacaaGAGCGAGTCATCTGTGACAGGataatggaag	nta-miR1919	GAGCGAGTCATCTGTGACAGG	3'	Yes	gp1a	...(((.....((((((((((((((((..((((((((.((((((((.((((..((..........(((((.....................)))))..........))..)))))))..))).)).))))))))))))))))))))))))....)))	154	42	-56.3	0.9	96.5	193.5	114	105.5	305	162	102.343	194.129	109.305	104.361	293.384	160.982	middle
89	153	nta-miR5303a	AAAATGTGGCCGGATACGTGT	21	NW_015935619.1	+	10111	10215	cggtgtctccgAAAATGTGGCCGGATACGTGTcggattgtccaaaaatagtgcatttttgaaggATCCGACACGGGTGCGGCTACATTttggagagttcgcgcaa	2	nta-MIR5303c,nta-MIR5303b,	nta-MIR5303b	ggtgtctccgAAAATGTGGCCGGATACGTGTcggattgtccaaaaatagtgcatttttgaatgatccgacACGGGTGCGGCTACATTTTGGagagttcgcgcaa	nta-miR5303a	AAAATGTGGCCGGATACGTGT	5'	Yes	gp1a	(((..(((((.((((((((((((.(..(((((((((((...(((((((.....)))))))...)))))))))))..).)))))))))))))))))..))).....	100	50.5	-53.2	1	122	153	169.5	237	172	160	129.387	153.497	162.519	234.442	165.449	158.994	middle
89	154	nta-MIR5303c-p3_2ss19TA23TC	ATCCGACACGGGTGCGGCAACACT	24	NW_015935619.1	+	10111	10215	cggtgtctccgAAAATGTGGCCGGATACGTGTcggattgtccaaaaatagtgcatttttgaaggATCCGACACGGGTGCGGCTACATTttggagagttcgcgcaa	2	nta-MIR5303c,nta-MIR5303b,	nta-MIR5303c	cggtgtctccgAAAATGTGGCCGGATACGTGTcggattgtccaaaaatagtgcatttttgaaggatccgacACGGGTGCGGCTACATTTTGGagagttcgcg	nta-MIR5303c-p3	atccgacACGGGTGCGGCTACATT	3'	New	gp1a	(((..(((((.((((((((((((.(..(((((((((((...(((((((.....)))))))...)))))))))))..).)))))))))))))))))..))).....	100	50.5	-53.2	1	97	187.5	213	212	224.5	197.5	102.873	188.11	204.227	209.712	215.95	196.258	middle
90	155	nta-miR5303a	AAAATGTGGCCGGATACGTGT	21	NW_015799661.1	+	44928	45031	ggactctccgAAAATGTGGCCGGATACGTGTcggatcctccaaaagtagtgcatttttgaaggATCCGACACGGGTGCGGCTACATTttggagagtccgcgcaa	1	nta-MIR5303a,	nta-MIR5303a	ggactctccgAAAATGTGGCCGGATACGTGTcggatcctccaaaagtagtgcatttttgaaggatccgacACGGGTGCGGCTACATTTTGGagagtccgcgcaa	nta-miR5303a	AAAATGTGGCCGGATACGTGT	5'	Yes	gp1a	(((((((((.((((((((((((.(..(((((((((((((.(((((((.....))))))).)))))))))))))..).)))))))))))))))))))))......	98	52.9	-70.7	1.3	122	153	169.5	237	172	160	129.387	153.497	162.519	234.442	165.449	158.994	middle
90	156	nta-MIR5303a-p3_2ss19TA23TC	ATCCGACACGGGTGCGGCAACACT	24	NW_015799661.1	+	44928	45031	ggactctccgAAAATGTGGCCGGATACGTGTcggatcctccaaaagtagtgcatttttgaaggATCCGACACGGGTGCGGCTACATTttggagagtccgcgcaa	1	nta-MIR5303a,	nta-MIR5303a	ggactctccgAAAATGTGGCCGGATACGTGTcggatcctccaaaagtagtgcatttttgaaggatccgacACGGGTGCGGCTACATTTTGGagagtccgcgcaa	nta-MIR5303a-p3	atccgacACGGGTGCGGCTACATT	3'	New	gp1a	(((((((((.((((((((((((.(..(((((((((((((.(((((((.....))))))).)))))))))))))..).)))))))))))))))))))))......	98	52.9	-70.7	1.3	97	187.5	213	212	224.5	197.5	102.873	188.11	204.227	209.712	215.95	196.258	middle
91	157	nta-miR6019a	TACAGGTGACTTGTAAATGTTT	22	NW_015816839.1	-	49018	49129	tcctagttgtcaaaagttcgTACAGGTGACTTGTAAATGTTTtgcgaccttctaatatgatactggcaaaACATTTACACGTACCTTGTATGaacttttgattctagctttg	1	nta-MIR6019a,	nta-MIR6019a	tcctagttgtcaaaagttcgTACAGGTGACTTGTAAATGTTTtgcgaccttctaatatgatactggcaaaacatttacacgtaccttgtatgaacttttgattctagctttg	nta-miR6019a	TACAGGTGACTTGTAAATGTTT	5'	Yes	gp1a	..((((..((((((((((((((((((..((.((((((((((((((.....((......)).....)))))))))))))).))..)))))))))))))))))).)))).....	105	35.7	-49.2	1.2	714.5	907.5	690	464	1198	538	757.762	910.451	661.581	458.993	1152.37	534.618	middle
91	158	nta-MIR6019a-p3	ACATTTACACGTACCTTGTATG	22	NW_015816839.1	-	49018	49129	tcctagttgtcaaaagttcgTACAGGTGACTTGTAAATGTTTtgcgaccttctaatatgatactggcaaaACATTTACACGTACCTTGTATGaacttttgattctagctttg	1	nta-MIR6019a,	nta-MIR6019a	tcctagttgtcaaaagttcgTACAGGTGACTTGTAAATGTTTtgcgaccttctaatatgatactggcaaaacatttacacgtaccttgtatgaacttttgattctagctttg	nta-MIR6019a-p3	acatttacacgtaccttgtatg	3'	New	gp1a	..((((..((((((((((((((((((..((.((((((((((((((.....((......)).....)))))))))))))).))..)))))))))))))))))).)))).....	105	35.7	-49.2	1.2	35.5	53	42	25	60.5	59.5	37.6495	53.1723	40.2701	24.7302	58.1958	59.126	middle
92	159	nta-miR6019a	TACAGGTGACTTGTAAATGTTT	22	NW_015829876.1	+	9081	9198	tctcctagttgtcaaaagttcgTACAGGTGACTTGTAAATGTTTtgctgaccttctaatatgatataactggcaaaACATTTACACGTACCTTGTATGaacttttgattctagctttg	1	nta-MIR6019b,	nta-MIR6019b	tctcctagttgtcaaaagttcgTACAGGTGACTTGTAAATGTTTtgctgaccttctaatatgatataactggcaaaacatttacacgtaccttgtatgaacttttgattctagctttg	nta-miR6019a	TACAGGTGACTTGTAAATGTTT	5'	Yes	gp1a	....((((..((((((((((((((((((..((.(((((((((((((((.....((......)).......))))))))))))))).))..)))))))))))))))))).)))).....	109	34.7	-49.4	1.2	714.5	907.5	690	464	1198	538	757.762	910.451	661.581	458.993	1152.37	534.618	middle
92	160	nta-MIR6019b-p3	ACATTTACACGTACCTTGTATG	22	NW_015829876.1	+	9081	9198	tctcctagttgtcaaaagttcgTACAGGTGACTTGTAAATGTTTtgctgaccttctaatatgatataactggcaaaACATTTACACGTACCTTGTATGaacttttgattctagctttg	1	nta-MIR6019b,	nta-MIR6019b	tctcctagttgtcaaaagttcgTACAGGTGACTTGTAAATGTTTtgctgaccttctaatatgatataactggcaaaacatttacacgtaccttgtatgaacttttgattctagctttg	nta-MIR6019b-p3	acatttacacgtaccttgtatg	3'	New	gp1a	....((((..((((((((((((((((((..((.(((((((((((((((.....((......)).......))))))))))))))).))..)))))))))))))))))).)))).....	109	34.7	-49.4	1.2	35.5	53	42	25	60.5	59.5	37.6495	53.1723	40.2701	24.7302	58.1958	59.126	middle
93	161	nta-miR6020a-5p	AAATGTTTTTCGAGTATCTTC	21	NW_015816839.1	-	49237	49354	tccctatacagacgacctgtAAATGTTTTTCGAGTATCTTCattcttccctcatcctactgatgttttagagaggaAGATACTCAGCAAAACATTTACtggttacttgtatagaatca	1	nta-MIR6020a,	nta-MIR6020a	tccctatacagacgacctgtAAATGTTTTTCGAGTATCTTCattcttccctcatcctactgatgttttagagaggaAGATACTCAGCAAAACATTTACtggttacttgtatagaatca	nta-miR6020a-5p	AAATGTTTTTCGAGTATCTTC	5'	Yes	gp1a	...((((((((..((((.(((((((((((..((((((((((.(((((....((((.....)))).....)))))))))))))))...))))))))))).))))..)))))))).....	110	36.4	-45.9	1.1	303	419	222	147	431	216	321.346	420.362	212.856	145.414	414.585	214.642	middle
93	162	nta-miR6020a-3p	AGATACTCAGCAAAACATTTAC	22	NW_015816839.1	-	49237	49354	tccctatacagacgacctgtAAATGTTTTTCGAGTATCTTCattcttccctcatcctactgatgttttagagaggaAGATACTCAGCAAAACATTTACtggttacttgtatagaatca	1	nta-MIR6020a,	nta-MIR6020a	tccctatacagacgacctgtAAATGTTTTTCGAGTATCTTCattcttccctcatcctactgatgttttagagaggaAGATACTCAGCAAAACATTTACtggttacttgtatagaatca	nta-miR6020a-3p	AGATACTCAGCAAAACATTTAC	3'	Yes	gp1a	...((((((((..((((.(((((((((((..((((((((((.(((((....((((.....)))).....)))))))))))))))...))))))))))).))))..)))))))).....	110	36.4	-45.9	1.1	108	167	129	107	190	99	114.539	167.543	123.687	105.845	182.764	98.3777	middle
94	163	nta-miR6020b	AAATGTTCTTCGAGTATCTTC	21	NW_015829876.1	+	8862	8978	tccctatgcagctgacttgtAAATGTTCTTCGAGTATCTTCattcttccttaatcctaatgaagttttagaggcgaAGATACTCGAAAAACATTTACttgttatttgtatagaatta	1	nta-MIR6020b,	nta-MIR6020b	tccctatgcagctgacttgtAAATGTTCTTCGAGTATCTTCattcttccttaatcctaatgaagttttagaggcgaagatactcgaaaaacatttacttgttatttgtatagaatta	nta-miR6020b	AAATGTTCTTCGAGTATCTTC	5'	Yes	gp1a	...(((((((..((((..(((((((((.(((((((((((((...((((..(((..((.....))..))))))).))))))))))))).)))))))))..))))..))))))).....	109	32.5	-45.5	1.2	6691	6216	6399	5078	6098	5807	7096.13	6236.21	6135.44	5023.2	5865.76	5770.5	high
94	164	nta-MIR6020b-p3	AGATACTCGAAAAACATTTAC	21	NW_015829876.1	+	8862	8978	tccctatgcagctgacttgtAAATGTTCTTCGAGTATCTTCattcttccttaatcctaatgaagttttagaggcgaAGATACTCGAAAAACATTTACttgttatttgtatagaatta	1	nta-MIR6020b,	nta-MIR6020b	tccctatgcagctgacttgtAAATGTTCTTCGAGTATCTTCattcttccttaatcctaatgaagttttagaggcgaagatactcgaaaaacatttacttgttatttgtatagaatta	nta-MIR6020b-p3	agatactcgaaaaacatttac	3'	New	gp1a	...(((((((..((((..(((((((((.(((((((((((((...((((..(((..((.....))..))))))).))))))))))))).)))))))))..))))..))))))).....	109	32.5	-45.5	1.2	478	754	320	139	956	289	506.942	756.452	306.82	137.5	919.59	287.183	middle
95	165	nta-miR6021	TTGGAAGAGGCTGCTATTGGA	21	NW_015922631.1	+	4430	4593	agcctttagagattagagagTTGGAAGAGGCTGCTATTGGAatcaatcgtcccgggtaagcaggctgcaactaaggtcaagttcaatcatgtggcccgacatctCATCACAGTTCACTCCTTCCCataggcagcaatctccgctcttattccatggtattgttt	1	nta-MIR6021,	nta-MIR6021	agcctttagagattagagagTTGGAAGAGGCTGCTATTGGAatcaatcgtcccgggtaagcaggctgcaactaaggtcaagttcaatcatgtggcccgacatctcatcacagttcactccttcccataggcagcaatctccgctcttattccatggtattgttt	nta-miR6021	TTGGAAGAGGCTGCTATTGGA	5'	Yes	gp1a	.(((....(((....((((((.(((.((.((((((((.((((..........(((((..((((..((.((((.......))))))..).))).)))))............((....))..)))).))).)))))..))))))))))).)))...))).......	156	47	-39.9	0.5	26429	22667	23914	24161	20121	26274	28029.3	22740.7	22929	23900.3	19354.7	26108.8	high
95	166	nta-MIR6021-p3	CATCACAGTTCACTCCTTCCC	21	NW_015922631.1	+	4430	4593	agcctttagagattagagagTTGGAAGAGGCTGCTATTGGAatcaatcgtcccgggtaagcaggctgcaactaaggtcaagttcaatcatgtggcccgacatctCATCACAGTTCACTCCTTCCCataggcagcaatctccgctcttattccatggtattgttt	1	nta-MIR6021,	nta-MIR6021	agcctttagagattagagagTTGGAAGAGGCTGCTATTGGAatcaatcgtcccgggtaagcaggctgcaactaaggtcaagttcaatcatgtggcccgacatctcatcacagttcactccttcccataggcagcaatctccgctcttattccatggtattgttt	nta-MIR6021-p3	catcacagttcactccttccc	3'	New	gp1a	.(((....(((....((((((.(((.((.((((((((.((((..........(((((..((((..((.((((.......))))))..).))).)))))............((....))..)))).))).)))))..))))))))))).)))...))).......	156	47	-39.9	0.5	4722	4528	5088	5452	4652	5717	5007.91	4542.72	4878.44	5393.16	4474.83	5681.06	high
96	167	nta-MIR6024-p5	AGAAACAACACTTGCTAAAAGA	22	NW_015932246.1	-	140724	140845	aagtcattgggcggaagtggAGAAACAACACTTGCTAAAAGAaattccttttagcaactcaatattaggctttggagtttTTTTAGCCAGAGTTGTTTTCCCtcttctcaactctgtagatc	1	nta-MIR6024,	nta-MIR6024	aagtcattgggcggaagtggagaaacaacacttgctaaaagaaattccttttagcaactcaatattaggctttggagtttTTTTAGCCAGAGTTGTTTTCCCtcttctcaactctgtagatc	nta-MIR6024-p5	agaaacaacacttgctaaaaga	5'	New	gp1a	..(((...(((.(((((.((..(((((((.((.(((.(((((((((((....(((.............)))..)))))))))))))).)).)))))))..)).)))))...)))....))).	119	38.5	-38.1	0.8	13	54	25	39	37	33	13.7871	54.1756	23.9703	38.5791	35.5908	32.7926	middle
96	168	nta-miR6024	TTTTAGCCAGAGTTGTTTTCCC	22	NW_015932246.1	-	140724	140845	aagtcattgggcggaagtggAGAAACAACACTTGCTAAAAGAaattccttttagcaactcaatattaggctttggagtttTTTTAGCCAGAGTTGTTTTCCCtcttctcaactctgtagatc	1	nta-MIR6024,	nta-MIR6024	aagtcattgggcggaagtggagaaacaacacttgctaaaagaaattccttttagcaactcaatattaggctttggagtttTTTTAGCCAGAGTTGTTTTCCCtcttctcaactctgtagatc	nta-miR6024	TTTTAGCCAGAGTTGTTTTCCC	3'	Yes	gp1a	..(((...(((.(((((.((..(((((((.((.(((.(((((((((((....(((.............)))..)))))))))))))).)).)))))))..)).)))))...)))....))).	119	38.5	-38.1	0.8	2899	2973	3557	3033	3526	3874	3074.53	2982.67	3410.5	3000.27	3391.71	3849.65	high
97	169	nta-MIR6025b-p5	TGTTATCTCAGTGTTGGCATG	21	NW_015922527.1	+	120689	120851	aaagtattgttgtacctggaTGTTATCTCAGTGTTGGCATGcataagttgggtaagacatatctgatcaaaaatattttctgagatgagatggaatatatatattttggtgttttacctagttcaggcaTGCCAACTATTGAGATGACATCtaggtttgtcga	1	nta-MIR6025b,	nta-MIR6025b	aaagtattgttgtacctggatgttatctcagtgttggcatgcataagttgggtaagacatatctgatcaaaaatattttctgagatgagatggaatatatatattttggtgttttacctagttcaggcaTGCCAACTATTGAGATGACATCtaggtttgtcga	nta-MIR6025b-p5	tgttatctcagtgttggcatg	5'	New	gp1a	......(((....(((((((((((((((((((((((((((((...(..((((((((((((((((.(((...............))).))))..((((....))))...))))))))))))..)...)))))))))).)))))))))))))))))))....)))	157	35	-68.1	1.2	246.75	231	304.5	292.5	261.75	261.5	261.69	231.751	291.958	289.343	251.781	259.856	middle
97	170	nta-miR6025b	TGCCAACTATTGAGATGACATC	22	NW_015922527.1	+	120689	120851	aaagtattgttgtacctggaTGTTATCTCAGTGTTGGCATGcataagttgggtaagacatatctgatcaaaaatattttctgagatgagatggaatatatatattttggtgttttacctagttcaggcaTGCCAACTATTGAGATGACATCtaggtttgtcga	1	nta-MIR6025b,	nta-MIR6025b	aaagtattgttgtacctggatgttatctcagtgttggcatgcataagttgggtaagacatatctgatcaaaaatattttctgagatgagatggaatatatatattttggtgttttacctagttcaggcaTGCCAACTATTGAGATGACATCtaggtttgtcga	nta-miR6025b	TGCCAACTATTGAGATGACATC	3'	Yes	gp1a	......(((....(((((((((((((((((((((((((((((...(..((((((((((((((((.(((...............))).))))..((((....))))...))))))))))))..)...)))))))))).)))))))))))))))))))....)))	157	35	-68.1	1.2	2140	2367	2878	3149	3684	3887	2269.58	2374.7	2759.46	3115.02	3543.69	3862.57	high
98	171	nta-MIR6025e-p5	TGTTATCTCAGTGTTGGCATG	21	NW_015830473.1	-	184681	184863	cgtacctggaTGTTATCTCAGTGTTGGCATGcataagttgggtaagacatatctgatcaaaaatattttttgagatgagatggaatatatatatatatatatatatatatatatatatatatatatattggtgttttacctggtccaggcaTGCCAATTATAGAGATGACATCtaggttgggg	1	nta-MIR6025e,	nta-MIR6025e	cgtacctggatgttatctcagtgttggcatgcataagttgggtaagacatatctgatcaaaaatattttttgagatgagatggaatatatatatatatatatatatatatatatatatatatatattggtgttttacctggtccaggcaTGCCAATTATAGAGATGACATCtaggttgggg	nta-MIR6025e-p5	tgttatctcagtgttggcatg	5'	New	gp1a	((.((((((((((((((((...((((((((((....(..(((((((((((((((.(((.((((....))))..))).))))..(((((((((((((((((((((....))))))))))))))))))))).)))))))))))..)....))))))))))....))))))))))))))))))...	180	31.1	-83	1.5	246.75	231	304.5	292.5	261.75	261.5	261.69	231.751	291.958	289.343	251.781	259.856	middle
98	172	nta-miR6025e	TGCCAATTATAGAGATGACATC	22	NW_015830473.1	-	184681	184863	cgtacctggaTGTTATCTCAGTGTTGGCATGcataagttgggtaagacatatctgatcaaaaatattttttgagatgagatggaatatatatatatatatatatatatatatatatatatatatatattggtgttttacctggtccaggcaTGCCAATTATAGAGATGACATCtaggttgggg	1	nta-MIR6025e,	nta-MIR6025e	cgtacctggatgttatctcagtgttggcatgcataagttgggtaagacatatctgatcaaaaatattttttgagatgagatggaatatatatatatatatatatatatatatatatatatatatattggtgttttacctggtccaggcaTGCCAATTATAGAGATGACATCtaggttgggg	nta-miR6025e	TGCCAATTATAGAGATGACATC	3'	Yes	gp1a	((.((((((((((((((((...((((((((((....(..(((((((((((((((.(((.((((....))))..))).))))..(((((((((((((((((((((....))))))))))))))))))))).)))))))))))..)....))))))))))....))))))))))))))))))...	180	31.1	-83	1.5	0	0	5	0	14	8	0	0	4.79406	0	13.4668	7.94971	middle
99	173	nta-miR6025a	TACCAACAATTGAGATAACATC	22	NW_015830473.1	-	184827	184949	ctggcaTACCAACAATTGAGATAACATCtaggtttgacgatcttttaagtaattatcctacgtccattcttgcacaaaagtattgtcgtacctggaTGTTATCTCAGTGTTGGCATGcataag	1	nta-MIR6025d,	nta-MIR6025d	ctggcaTACCAACAATTGAGATAACATCtaggtttgacgatcttttaagtaattatcctacgtccattcttgcacaaaagtattgtcgtacctggatgttatctcagtgttggcatgcataag	nta-miR6025a	TACCAACAATTGAGATAACATC	5'	Yes	gp1a	...((((.(((((.(((((((((((((((((((..(((((((((((..((((.................))))..))))).))))))..)))))))))))))))))))))))).)))).....	115	38.2	-52.4	1.1	2099	2360	2271.5	1980.5	3458	2919.5	2226.09	2367.67	2177.94	1959.13	3326.3	2901.15	high
99	174	nta-MIR6025d-p3	TGTTATCTCAGTGTTGGCATG	21	NW_015830473.1	-	184827	184949	ctggcaTACCAACAATTGAGATAACATCtaggtttgacgatcttttaagtaattatcctacgtccattcttgcacaaaagtattgtcgtacctggaTGTTATCTCAGTGTTGGCATGcataag	1	nta-MIR6025d,	nta-MIR6025d	ctggcaTACCAACAATTGAGATAACATCtaggtttgacgatcttttaagtaattatcctacgtccattcttgcacaaaagtattgtcgtacctggatgttatctcagtgttggcatgcataag	nta-MIR6025d-p3	tgttatctcagtgttggcatg	3'	New	gp1a	...((((.(((((.(((((((((((((((((((..(((((((((((..((((.................))))..))))).))))))..)))))))))))))))))))))))).)))).....	115	38.2	-52.4	1.1	246.75	231	304.5	292.5	261.75	261.5	261.69	231.751	291.958	289.343	251.781	259.856	middle
100	175	nta-MIR6025c-p5	CCTGGATGTAATCTCAATTGT	21	NW_015917415.1	+	217373	217531	gtcaaaCCTGGATGTAATCTCAATTGTtagcatgcctaaattgggcaaaacatctccgcccagaaaatatattctgatatgagattcagaatatatttgttgggtgttttgcctagtccggcataccaTCAATTGAGATGACATCTAGTtttgacgatc	1	nta-MIR6025c,	nta-MIR6025c	gtcaaacctggatgtaatctcaattgttagcatgcctaaattgggcaaaacatctccgcccagaaaatatattctgatatgagattcagaatatatttgttgggtgttttgcctagtccggcataccaTCAATTGAGATGACATCTAGTtttgacgatc	nta-MIR6025c-p5	cctggatgtaatctcaattgt	5'	New	gp1a	((((((.((((((((.((((((((((.....(((((...((((((((((((......(((((..(((((((((((((........)))))))))))))..)))))))))))))))))..))))).....)))))))))).)))))))).))))))....	155	38.4	-76	1.2	219	256	203	191	345	193	232.26	256.832	194.639	188.939	331.861	191.787	middle
100	176	nta-miR6025c	TCAATTGAGATGACATCTAGT	21	NW_015917415.1	+	217373	217531	gtcaaaCCTGGATGTAATCTCAATTGTtagcatgcctaaattgggcaaaacatctccgcccagaaaatatattctgatatgagattcagaatatatttgttgggtgttttgcctagtccggcataccaTCAATTGAGATGACATCTAGTtttgacgatc	1	nta-MIR6025c,	nta-MIR6025c	gtcaaacctggatgtaatctcaattgttagcatgcctaaattgggcaaaacatctccgcccagaaaatatattctgatatgagattcagaatatatttgttgggtgttttgcctagtccggcataccaTCAATTGAGATGACATCTAGTtttgacgatc	nta-miR6025c	TCAATTGAGATGACATCTAGT	3'	Yes	gp1a	((((((.((((((((.((((((((((.....(((((...((((((((((((......(((((..(((((((((((((........)))))))))))))..)))))))))))))))))..))))).....)))))))))).)))))))).))))))....	155	38.4	-76	1.2	282	576	291	174	1639	521	299.075	577.873	279.014	172.122	1576.58	517.725	middle
101	177	nta-miR6025a	TACCAACAATTGAGATAACATC	22	NW_015922527.1	+	120599	120749	ttttttacccgaccctggcaTACCAACAATTGAGATAACATCtaggtttgacgatcttttaagtaattatcatacatccattcttgcacaaaagtattgttgtacctggaTGTTATCTCAGTGTTGGCATGcataagttgggtaagacata	1	nta-MIR6025a,	nta-MIR6025a	ttttttacccgaccctggcaTACCAACAATTGAGATAACATCtaggtttgacgatcttttaagtaattatcatacatccattcttgcacaaaagtattgttgtacctggatgttatctcagtgttggcatgcataagttgggtaagacata	nta-miR6025a	TACCAACAATTGAGATAACATC	5'	Yes	gp1a	..(((((((((((....((((.(((((.(((((((((((((((((((..(((((((((((..((((.................))))..))))).))))))..)))))))))))))))))))))))).))))....)))))))))))....	145	36.4	-66	1.2	2099	2360	2271.5	1980.5	3458	2919.5	2226.09	2367.67	2177.94	1959.13	3326.3	2901.15	high
101	178	nta-MIR6025a-p3	TGTTATCTCAGTGTTGGCATG	21	NW_015922527.1	+	120599	120749	ttttttacccgaccctggcaTACCAACAATTGAGATAACATCtaggtttgacgatcttttaagtaattatcatacatccattcttgcacaaaagtattgttgtacctggaTGTTATCTCAGTGTTGGCATGcataagttgggtaagacata	1	nta-MIR6025a,	nta-MIR6025a	ttttttacccgaccctggcaTACCAACAATTGAGATAACATCtaggtttgacgatcttttaagtaattatcatacatccattcttgcacaaaagtattgttgtacctggatgttatctcagtgttggcatgcataagttgggtaagacata	nta-MIR6025a-p3	tgttatctcagtgttggcatg	3'	New	gp1a	..(((((((((((....((((.(((((.(((((((((((((((((((..(((((((((((..((((.................))))..))))).))))))..)))))))))))))))))))))))).))))....)))))))))))....	145	36.4	-66	1.2	246.75	231	304.5	292.5	261.75	261.5	261.69	231.751	291.958	289.343	251.781	259.856	middle
102	179	nta-miR6144	TGGCAACTTCTTCATCATGCC	21	NW_015951614.1	+	92397	92532	gagtaaactaTGGCAACTTCTTCATCATGCCaactgccttctactcaccacttgtttgagatatcggagtttgaacaaaaagagagagtcttttggcagttatggCTTGTTGAAGAAGTTTCCATCatttactagc	1	nta-MIR6144,	nta-MIR6144	gagtaaactaTGGCAACTTCTTCATCATGCCaactgccttctactcaccacttgtttgagatatcggagtttgaacaaaaagagagagtcttttggcagttatggcttgttgaagaagtttccatcatttactagc	nta-miR6144	TGGCAACTTCTTCATCATGCC	5'	Yes	gp1a	.((((((..((((.((((((((((.((.((((((((((....((((.....(((((..((.........))..))))).......)))).....))))))..)))).)).)))))))))).))))..))))))...	132	39.7	-48.2	0.9	938	1221	1127	793	1030	1873	994.795	1224.97	1080.58	784.442	990.772	1861.23	high
102	180	nta-MIR6144-p3	CTTGTTGAAGAAGTTTCCATC	21	NW_015951614.1	+	92397	92532	gagtaaactaTGGCAACTTCTTCATCATGCCaactgccttctactcaccacttgtttgagatatcggagtttgaacaaaaagagagagtcttttggcagttatggCTTGTTGAAGAAGTTTCCATCatttactagc	1	nta-MIR6144,	nta-MIR6144	gagtaaactaTGGCAACTTCTTCATCATGCCaactgccttctactcaccacttgtttgagatatcggagtttgaacaaaaagagagagtcttttggcagttatggcttgttgaagaagtttccatcatttactagc	nta-MIR6144-p3	cttgttgaagaagtttccatc	3'	New	gp1a	.((((((..((((.((((((((((.((.((((((((((....((((.....(((((..((.........))..))))).......)))).....))))))..)))).)).)))))))))).))))..))))))...	132	39.7	-48.2	0.9	4292	4035	5031	4154	5679	5273	4551.88	4048.12	4823.79	4109.17	5462.71	5239.85	high
103	181	nta-MIR6145c-p5	ATTGTTATATGTTGCACTGGCC	22	NW_015911376.1	-	49497	49574	aaaagttATTGTTATATGTTGCACTGGCCaaaatggagaattcctggCCAGTGCACATATAACAGTAAttttagcttg	1	nta-MIR6145c,	nta-MIR6145c	tgcaaaaagttattgttatatgttgcactggccaaaattggagattcctggcCAGTGCACATATAACAGTAAttttagcttg	nta-MIR6145c-p5	attgttatatgttgcactggcc	5'	New	gp1a	.((((((((((((((((((.((((((((((....((......))))))))))))))))))))))))))))))......	71	35.9	-41	1.5	8553	7207	8320	7965	11349	10119	9070.88	7230.43	7977.32	7879.04	10916.8	10055.4	high
103	182	nta-miR6145c_L+1	CCAGTGCACATATAACAGTAA	21	NW_015911376.1	-	49497	49574	aaaagttATTGTTATATGTTGCACTGGCCaaaatggagaattcctggCCAGTGCACATATAACAGTAAttttagcttg	1	nta-MIR6145c,	nta-MIR6145c	tgcaaaaagttattgttatatgttgcactggccaaaattggagattcctggcCAGTGCACATATAACAGTAAttttagcttg	nta-miR6145c	CAGTGCACATATAACAGTAA	3'	Diff	gp1a	.((((((((((((((((((.((((((((((....((......))))))))))))))))))))))))))))))......	71	35.9	-41	1.5	5	27	0	0	37	20	5.30275	27.0878	0	0	35.5908	19.8743	middle
104	183	nta-miR6145b_L+2R-1	TATTATCATACGTAGCACTAGC	22	NW_015815980.1	-	18974	19053	gcaagagtTATTATCATACGTAGCACTAGCcaaatggagaaatatcggtCAGTGCTCGTGTAATAATAACttttgttcgt	1	nta-MIR6145b,	nta-MIR6145b	gcaagagttaTTATCATACGTAGCACTAGCCaaatggagaaatatcggtcagtgctcgtgtaataataacttttgttcgt	nta-miR6145b	TTATCATACGTAGCACTAGCC	5'	Diff	gp1a	((((((((((((((.(((((.((((((..((...............))..))))))))))).))))))))))))))....	76	37.5	-32.6	1.1	123	136	109	77	203	106	130.448	136.442	104.511	76.169	195.269	105.334	middle
104	184	nta-MIR6145b-p3	CAGTGCTCGTGTAATAATAAC	21	NW_015815980.1	-	18974	19053	gcaagagtTATTATCATACGTAGCACTAGCcaaatggagaaatatcggtCAGTGCTCGTGTAATAATAACttttgttcgt	1	nta-MIR6145b,	nta-MIR6145b	gcaagagttaTTATCATACGTAGCACTAGCCaaatggagaaatatcggtcagtgctcgtgtaataataacttttgttcgt	nta-MIR6145b-p3	cagtgctcgtgtaataataac	3'	New	gp1a	((((((((((((((.(((((.((((((..((...............))..))))))))))).))))))))))))))....	76	37.5	-32.6	1.1	47	79	61	61	110	74	49.8458	79.2569	58.4876	60.3417	105.811	73.5348	middle
105	185	nta-miR6145f_L+1	TATCGTAACATATAGCACTAGC	22	NW_015942056.1	+	5673	5753	ggtaattgaTATCGTAACATATAGCACTAGCtatgcctatatgtgcgagcCAGTGCTCATGCTACGATATCgattatcatc	1	nta-MIR6145f,	nta-MIR6145f	ggtaattgatATCGTAACATATAGCACTAGCtatgcctatatgtgcgagccagtgctcatgctacgatatcgattatcatc	nta-miR6145f	ATCGTAACATATAGCACTAGC	5'	Diff	gp1a	((((((((((((((((.(((..((((((.(((.(((........)))))).)))))).))).))))))))))))))))...	78	40.7	-37	1.1	573	848	356	241	1020	346	607.695	850.757	341.337	238.399	981.153	343.825	middle
105	186	nta-MIR6145f-p3	CAGTGCTCATGCTACGATATC	21	NW_015942056.1	+	5673	5753	ggtaattgaTATCGTAACATATAGCACTAGCtatgcctatatgtgcgagcCAGTGCTCATGCTACGATATCgattatcatc	1	nta-MIR6145f,	nta-MIR6145f	ggtaattgatATCGTAACATATAGCACTAGCtatgcctatatgtgcgagccagtgctcatgctacgatatcgattatcatc	nta-MIR6145f-p3	cagtgctcatgctacgatatc	3'	New	gp1a	((((((((((((((((.(((..((((((.(((.(((........)))))).)))))).))).))))))))))))))))...	78	40.7	-37	1.1	1226	1291	1597	1372	1207	1645	1300.23	1295.2	1531.22	1357.19	1161.03	1634.66	high
106	187	nta-miR6145e_R+1	ATTGTTACATGTAGCACTGGCT	22	NW_015915147.1	+	37335	37414	gtaatgagcATTGTTACATGTAGCACTGGCTcgcataaatatttaccagcCCGTGCTCATGTGACAATCCcctttgctcg	1	nta-MIR6145e,	nta-MIR6145e	gtaatgagcATTGTTACATGTAGCACTGGCtcgcataaatatttaccagcccgtgctcatgtgacaatcccctttgctcg	nta-miR6145e	ATTGTTACATGTAGCACTGGC	5'	Diff	gp1a	.....(((((((((((((((.(((((.((((................)))).))))))))))))))).......))))).	74	46.2	-31	0.8	4448	4358	4974	4104.5	5438.5	4357.5	4717.32	4372.17	4769.13	4060.21	5231.37	4330.11	high
106	188	nta-MIR6145e-p3	CCGTGCTCATGTGACAATCC	20	NW_015915147.1	+	37335	37414	gtaatgagcATTGTTACATGTAGCACTGGCTcgcataaatatttaccagcCCGTGCTCATGTGACAATCCcctttgctcg	1	nta-MIR6145e,	nta-MIR6145e	gtaatgagcATTGTTACATGTAGCACTGGCtcgcataaatatttaccagcccgtgctcatgtgacaatcccctttgctcg	nta-MIR6145e-p3	ccgtgctcatgtgacaatcc	3'	New	gp1a	.....(((((((((((((((.(((((.((((................)))).))))))))))))))).......))))).	74	46.2	-31	0.8	35	33	22	19	40	28	37.1192	33.1073	21.0939	18.795	38.4766	27.824	middle
107	189	nta-miR6145d	ATTGTTACATGTAACACTGGC	21	NW_015901014.1	-	277461	277541	tgctagaggtATTGTTACATGTAACACTGGCttgcataaggaaatttcggcCAGTGTTAGTGTAACAATCCcttcggcctg	1	nta-MIR6145d,	nta-MIR6145d	tgctagaggtATTGTTACATGTAACACTGGCttgcataaggaaatttcggccagtgttagtgtaacaatcccttcggcctg	nta-miR6145d	ATTGTTACATGTAACACTGGC	5'	Yes	gp1a	.((..((((.((((((((((.(((((((((((................))))))))))))))))))))).))))..))...	77	44.4	-36.7	1	2618	3395	1794	1012.5	4668.5	1583.5	2776.52	3406.04	1720.11	1001.57	4490.7	1573.55	high
107	190	nta-MIR6145d-p3	CAGTGTTAGTGTAACAATCC	20	NW_015901014.1	-	277461	277541	tgctagaggtATTGTTACATGTAACACTGGCttgcataaggaaatttcggcCAGTGTTAGTGTAACAATCCcttcggcctg	1	nta-MIR6145d,	nta-MIR6145d	tgctagaggtATTGTTACATGTAACACTGGCttgcataaggaaatttcggccagtgttagtgtaacaatcccttcggcctg	nta-MIR6145d-p3	cagtgttagtgtaacaatcc	3'	New	gp1a	.((..((((.((((((((((.(((((((((((................))))))))))))))))))))).))))..))...	77	44.4	-36.7	1	23	70	77	66	90	98	24.3926	70.2276	73.8286	65.2877	86.5723	97.384	middle
108	191	nta-miR6145a	CATTTTCACATGTAGCACTGAC	22	NW_015787453.1	-	181223	181304	tttcagtggcCATTTTCACATGTAGCACTGACtggattgcaaaatccaattCGGTGCTCATGTGAAGGTGACttctgcttgc	1	nta-MIR6145a,	nta-MIR6145a	tttcagtggcCATTTTCACATGTAGCACTGACtggattgcaaaatccaattcggtgctcatgtgaaggtgacttctgcttgc	nta-miR6145a	CATTTTCACATGTAGCACTGAC	5'	Yes	gp1a	...(((..(.((..((((((((.((((((((.((((((....))))))..))))))))))))))))..)).)..))).....	74	45.1	-37.6	1	273	488	240	267	566	225	289.53	489.587	230.115	264.119	544.444	223.586	middle
108	192	nta-MIR6145a-p3	CGGTGCTCATGTGAAGGTGAC	21	NW_015787453.1	-	181223	181304	tttcagtggcCATTTTCACATGTAGCACTGACtggattgcaaaatccaattCGGTGCTCATGTGAAGGTGACttctgcttgc	1	nta-MIR6145a,	nta-MIR6145a	tttcagtggcCATTTTCACATGTAGCACTGACtggattgcaaaatccaattcggtgctcatgtgaaggtgacttctgcttgc	nta-MIR6145a-p3	cggtgctcatgtgaaggtgac	3'	New	gp1a	...(((..(.((..((((((((.((((((((.((((((....))))))..))))))))))))))))..)).)..))).....	74	45.1	-37.6	1	149	287	127	144	414	134	158.022	287.933	121.769	142.446	398.233	133.158	middle
109	193	nta-miR6146a	TTTGTCCAATGAAACACTTATC	22	NW_015930041.1	+	33176	33256	ctcaacgggcTTTGTCCAATGAAACACTTATCggacatcaagggttcagaTCAGTGTTCACTGGACAAAGAtcgttaccgt	1	nta-MIR6146a,	nta-MIR6146a	ctcaacgggcTTTGTCCAATGAAACACTTATCggacatcaagggttcagatcagtgttcactggacaaagatcgttaccgt	nta-miR6146a	TTTGTCCAATGAAACACTTATC	5'	Yes	gp1a	...((((..(((((((((.((((.((((.(((((((.......)))).))).)))))))).)))))))))..)))).....	73	45.7	-32.1	0.9	1592.5	1881.5	990	528	2189.5	838	1688.92	1887.62	949.225	522.302	2106.11	832.732	high
109	194	nta-MIR6146a-p3	TCAGTGTTCACTGGACAAAGA	21	NW_015930041.1	+	33176	33256	ctcaacgggcTTTGTCCAATGAAACACTTATCggacatcaagggttcagaTCAGTGTTCACTGGACAAAGAtcgttaccgt	1	nta-MIR6146a,	nta-MIR6146a	ctcaacgggcTTTGTCCAATGAAACACTTATCggacatcaagggttcagatcagtgttcactggacaaagatcgttaccgt	nta-MIR6146a-p3	tcagtgttcactggacaaaga	3'	New	gp1a	...((((..(((((((((.((((.((((.(((((((.......)))).))).)))))))).)))))))))..)))).....	73	45.7	-32.1	0.9	129	173	72	30	193	68	136.811	173.563	69.0345	29.6762	185.65	67.5725	middle
110	195	nta-miR6146b	TTTGTCCAATGAAATACTTATC	22	NW_015902119.1	+	32152	32232	ctcaacgggtTTTGTCCAATGAAATACTTATCagacatcaagggtccagaTAAGTGTTCATTGGACAAAGAtcgttactgt	1	nta-MIR6146b,	nta-MIR6146b	ctcaacgggtTTTGTCCAATGAAATACTTATCagacatcaagggtccagataagtgttcattggacaaagatcgttactgt	nta-miR6146b	TTTGTCCAATGAAATACTTATC	5'	Yes	gp1a	...((((..((((((((((((((.((((((((.(((.......)))..))))))))))))))))))))))..)))).....	73	39.5	-34.4	1.1	10995.5	16727.5	7091	3906	19387.5	6693	11661.3	16781.9	6798.94	3863.85	18649.1	6650.93	high
110	196	nta-MIR6146b-p3	TAAGTGTTCATTGGACAAAGA	21	NW_015902119.1	+	32152	32232	ctcaacgggtTTTGTCCAATGAAATACTTATCagacatcaagggtccagaTAAGTGTTCATTGGACAAAGAtcgttactgt	1	nta-MIR6146b,	nta-MIR6146b	ctcaacgggtTTTGTCCAATGAAATACTTATCagacatcaagggtccagataagtgttcattggacaaagatcgttactgt	nta-MIR6146b-p3	taagtgttcattggacaaaga	3'	New	gp1a	...((((..((((((((((((((.((((((((.(((.......)))..))))))))))))))))))))))..)))).....	73	39.5	-34.4	1.1	163	213	86	42	326	91	172.87	213.693	82.4579	41.5467	313.584	90.428	middle
111	197	nta-miR6147	TGACATCTTCAAAACCCACTA	21	NW_015830473.1	-	171181	171284	attttgcacaTGACATCTTCAAAACCCACTAtgttcttacacttcatcactatagtgtgtgtacagagaaataGTGGGTATTGAAGATGTTATGcctaaaatag	1	nta-MIR6147,	nta-MIR6147	attttgcacaTGACATCTTCAAAACCCACTAtgttcttacacttcatcactatagtgtgtgtacagagaaatagtgggtattgaagatgttatgcctaaaatag	nta-miR6147	TGACATCTTCAAAACCCACTA	5'	Yes	gp1a	((((((..((((((((((((((.(((((((((.(((((((((..(((.......))).))))).))))..))))))))).))))))))))))))..))))))..	102	34.6	-44.4	1.2	294	471	527	318	513	439	311.801	472.531	505.294	314.568	493.462	436.24	middle
111	198	nta-MIR6147-p3	GTGGGTATTGAAGATGTTATG	21	NW_015830473.1	-	171181	171284	attttgcacaTGACATCTTCAAAACCCACTAtgttcttacacttcatcactatagtgtgtgtacagagaaataGTGGGTATTGAAGATGTTATGcctaaaatag	1	nta-MIR6147,	nta-MIR6147	attttgcacaTGACATCTTCAAAACCCACTAtgttcttacacttcatcactatagtgtgtgtacagagaaatagtgggtattgaagatgttatgcctaaaatag	nta-MIR6147-p3	gtgggtattgaagatgttatg	3'	New	gp1a	((((((..((((((((((((((.(((((((((.(((((((((..(((.......))).))))).))))..))))))))).))))))))))))))..))))))..	102	34.6	-44.4	1.2	5	8	6	0	7	0	5.30275	8.02601	5.75288	0	6.7334	0	low
112	199	nta-miR6148b_R+2	TGTGTTAATCGTTTGTTCTCAAC	23	NW_015928827.1	-	47964	48026	acccgaaattTGTGTTAATCGTTTGTTCTCAACaagaacattcgattaacaccagtttcggct	1	nta-MIR6148b,	nta-MIR6148b	acccgaaattTGTGTTAATCGTTTGTTCTCAacaagaacattcgattaacaccagtttcggct	nta-miR6148b	TGTGTTAATCGTTTGTTCTCA	5'	Diff	gp1a	..((((((((.((((((((((..((((((.....))))))..)))))))))).))))))))..	59	38.1	-31.3	1.3	9	17	6	11	9	10	9.54494	17.0553	5.75288	10.8813	8.65723	9.93714	middle
113	200	nta-miR6148a_L+1	CTACGTCGATCGATTGTTCTTA	22	NW_015899950.1	-	130713	130776	acctagaacCTACGTCGATCGATTGTTCTTAacaagaacaattgattgacgttggttttggttc	1	nta-MIR6148a,	nta-MIR6148a	acctagaaccTACGTCGATCGATTGTTCTTAacaagaacaattgattgacgttggttttggttc	nta-miR6148a	TACGTCGATCGATTGTTCTTA	5'	Diff	gp1a	..((((((((.(((((((((((((((((((...))))))))))))))))))).))))))))...	59	39.1	-35.8	1.4	6	7	0	5	0	0	6.36329	7.02276	0	4.94604	0	0	low
114	201	nta-miR6149a	TTGATACGCACCTGAATCGGC	21	NW_015898127.1	+	1989	2076	atgtcaaagcTTGATACGCACCTGAATCGGCaactacgtacagaccaatacatatgcCGATCTGGGTTCGTATCAAACtatgatatac	1	nta-MIR6149b,	nta-MIR6149b	atgtcaaagcTTGATACGCACCTGAATCGGCaactacgtacagaccaatacatatgccgatctgggttcgtatcaaactatgatatac	nta-miR6149a	TTGATACGCACCTGAATCGGC	5'	Yes	gp1a	((((((.((.((((((((.((((..(((((((..((.(((........))).)))))))))..)))).)))))))).)).))))))..	86	42	-34.7	0.9	94735.5	94146.5	133476	110460	140414	137288	100472	94452.6	127979	109268	135066	136425	high
114	202	nta-MIR6149b-p3	CGATCTGGGTTCGTATCAAAC	21	NW_015898127.1	+	1989	2076	atgtcaaagcTTGATACGCACCTGAATCGGCaactacgtacagaccaatacatatgcCGATCTGGGTTCGTATCAAACtatgatatac	1	nta-MIR6149b,	nta-MIR6149b	atgtcaaagcTTGATACGCACCTGAATCGGCaactacgtacagaccaatacatatgccgatctgggttcgtatcaaactatgatatac	nta-MIR6149b-p3	cgatctgggttcgtatcaaac	3'	New	gp1a	((((((.((.((((((((.((((..(((((((..((.(((........))).)))))))))..)))).)))))))).)).))))))..	86	42	-34.7	0.9	442	502	1179	1102	532	596	468.763	503.632	1130.44	1090.11	511.739	592.253	middle
115	203	nta-miR6149a	TTGATACGCACCTGAATCGGC	21	NW_015925619.1	+	24851	24949	atgtcaaagcTTGATACGCACCTGAATCGGCagttacatacagaccaatagtatattagtacatatgcCGGTTTGGGTTCGTATCAAACtatgatatac	1	nta-MIR6149a,	nta-MIR6149a	atgtcaaagcTTGATACGCACCTGAATCGGCagttacatacagaccaatagtatattagtacatatgccggtttgggttcgtatcaaactatgatatac	nta-miR6149a	TTGATACGCACCTGAATCGGC	5'	Yes	gp1a	((((((.((.((((((((.(((..((((((((..(((((((.........))))....)))....))))))))..))).)))))))).)).))))))..	97	38.4	-38.6	1	94735.5	94146.5	133476	110460	140414	137288	100472	94452.6	127979	109268	135066	136425	high
115	204	nta-MIR6149a-p3	CGGTTTGGGTTCGTATCAAAC	21	NW_015925619.1	+	24851	24949	atgtcaaagcTTGATACGCACCTGAATCGGCagttacatacagaccaatagtatattagtacatatgcCGGTTTGGGTTCGTATCAAACtatgatatac	1	nta-MIR6149a,	nta-MIR6149a	atgtcaaagcTTGATACGCACCTGAATCGGCagttacatacagaccaatagtatattagtacatatgccggtttgggttcgtatcaaactatgatatac	nta-MIR6149a-p3	cggtttgggttcgtatcaaac	3'	New	gp1a	((((((.((.((((((((.(((..((((((((..(((((((.........))))....)))....))))))))..))).)))))))).)).))))))..	97	38.4	-38.6	1	10	32	7	0	37	11	10.6055	32.104	6.71169	0	35.5908	10.9309	middle
116	205	nta-MIR6150-p5	TTGTTTGATCGTCTTGGCCAAG	22	NW_015880545.1	-	4944	5024	ccctgatagcagatTTGTTTGATCGTCTTGGCCAAGccaaggtatttaccaagatggatttaaggaaaggatattatcaag	1	nta-MIR6150,	nta-MIR6150	ccctgatagcAGATTTGTTTGATCGTCTTGGCcaagccaaggtatttaccaagatggatttaaggaaaggatattatcaag	nta-MIR6150-p5	TTGTTTGATCGTCTTGGCcaag	5'	New	gp1a	...((((((....(((.((((((((((((((....((....)).....)))))))))..)))))..)))....))))))..	76	39.5	-15.9	0.5	111	215	323	63	261	243	117.721	215.699	309.696	62.3201	251.06	241.472	middle
117	206	nta-miR6151g	TGAGTGTGAGGCGTTGGATTGA	22	NW_015902503.1	+	66400	66470	agatactggaTGAGTGTGAGGCGTTGGATTGAtttcactcAATCCGAGCCCCACATTCATCaaggattggt	1	nta-MIR6151g,	nta-MIR6151g	agatactggaTGAGTGTGAGGCGTTGGATTGAtttcactcaatccgagccccacattcatcaaggattggt	nta-miR6151g	TGAGTGTGAGGCGTTGGATTGA	5'	Yes	gp1a	.....((.((((((((((.(((.(((((((((......)))))))))))).)))))))))).)).......	59	46.5	-33.5	1	116	89.2083	122.667	122.333	99	112	123.024	89.4984	117.614	121.013	95.2296	111.296	middle
117	207	nta-MIR6151g-p3	AATCCGAGCCCCACATTCATC	21	NW_015902503.1	+	66400	66470	agatactggaTGAGTGTGAGGCGTTGGATTGAtttcactcAATCCGAGCCCCACATTCATCaaggattggt	1	nta-MIR6151g,	nta-MIR6151g	agatactggaTGAGTGTGAGGCGTTGGATTGAtttcactcaatccgagccccacattcatcaaggattggt	nta-MIR6151g-p3	aatccgagccccacattcatc	3'	New	gp1a	.....((.((((((((((.(((.(((((((((......)))))))))))).)))))))))).)).......	59	46.5	-33.5	1	148.833	188.833	188.35	222.15	220.667	241.917	157.845	189.447	180.592	219.753	212.263	240.396	middle
118	208	nta-miR6151g	TGAGTGTGAGGCGTTGGATTGA	22	NW_015795131.1	-	2028	2098	agatgctggaTGAGTGTGAGGCGTTGGATTGAtttcactcAATCCGAGCCCCACATTCATCaaggattggt	1	nta-MIR6151h,	nta-MIR6151h	agatgctggaTGAGTGTGAGGCGTTGGATTGAtttcactcaatccgagccccacattcatcaaggattggt	nta-miR6151g	TGAGTGTGAGGCGTTGGATTGA	5'	Yes	gp1a	.(((.((.((((((((((.(((.(((((((((......)))))))))))).)))))))))).)).)))...	67	47.9	-35.5	1	116	89.2083	122.667	122.333	99	112	123.024	89.4984	117.614	121.013	95.2296	111.296	middle
118	209	nta-MIR6151h-p3	AATCCGAGCCCCACATTCATC	21	NW_015795131.1	-	2028	2098	agatgctggaTGAGTGTGAGGCGTTGGATTGAtttcactcAATCCGAGCCCCACATTCATCaaggattggt	1	nta-MIR6151h,	nta-MIR6151h	agatgctggaTGAGTGTGAGGCGTTGGATTGAtttcactcaatccgagccccacattcatcaaggattggt	nta-MIR6151h-p3	aatccgagccccacattcatc	3'	New	gp1a	.(((.((.((((((((((.(((.(((((((((......)))))))))))).)))))))))).)).)))...	67	47.9	-35.5	1	148.833	188.833	188.35	222.15	220.667	241.917	157.845	189.447	180.592	219.753	212.263	240.396	middle
119	210	nta-miR6151a	TGAATGTGAGGCATTGGATTGA	22	NW_015911304.1	-	1298	1368	attcgttggaTGAATGTGAGGCATTGGATTGAtttcgtacAATCCGAGCCCTACATTCATCcagggttcgt	1	nta-MIR6151b,	nta-MIR6151b	attcgttggaTGAATGTGAGGCATTGGATTGAtttcgtacaatccgagccctacattcatccagggttcgt	nta-miR6151a	TGAATGTGAGGCATTGGATTGA	5'	Yes	gp1a	.....((((((((((((..(((.((((((((........)))))))))))..)))))))))))).......	59	45.1	-33.2	1	3.8	2.475	0	1.6	1.6	3	4.03009	2.48305	0	1.58273	1.53906	2.98114	low
119	211	nta-MIR6151b-p3	AATCCGAGCCCTACATTCATC	21	NW_015911304.1	-	1298	1368	attcgttggaTGAATGTGAGGCATTGGATTGAtttcgtacAATCCGAGCCCTACATTCATCcagggttcgt	1	nta-MIR6151b,	nta-MIR6151b	attcgttggaTGAATGTGAGGCATTGGATTGAtttcgtacaatccgagccctacattcatccagggttcgt	nta-MIR6151b-p3	aatccgagccctacattcatc	3'	New	gp1a	.....((((((((((((..(((.((((((((........)))))))))))..)))))))))))).......	59	45.1	-33.2	1	24	34	34.3333	38	43.6667	40	25.4532	34.1106	32.9192	37.5899	42.0036	39.7486	middle
120	212	nta-miR6151a	TGAATGTGAGGCATTGGATTGA	22	NW_015797606.1	+	1543	1614	attcgttggaTGAATGTGAGGCATTGGATTGAtttcgttcAATCCGAGCCCCACATTCATCagggattcgtt	1	nta-MIR6151e,	nta-MIR6151e	attcgttggaTGAATGTGAGGCATTGGATTGAtttcgttcaatccgagccccacattcatcaggattcgtt	nta-miR6151a	TGAATGTGAGGCATTGGATTGA	5'	Yes	gp1a	........((((((((((.(((.(((((((((......)))))))))))).))))))))))...........	53	44.4	-33.4	1	3.8	2.475	0	1.6	1.6	3	4.03009	2.48305	0	1.58273	1.53906	2.98114	low
120	213	nta-MIR6151e-p3	AATCCGAGCCCCACATTCATC	21	NW_015797606.1	+	1543	1614	attcgttggaTGAATGTGAGGCATTGGATTGAtttcgttcAATCCGAGCCCCACATTCATCagggattcgtt	1	nta-MIR6151e,	nta-MIR6151e	attcgttggaTGAATGTGAGGCATTGGATTGAtttcgttcaatccgagccccacattcatcaggattcgtt	nta-MIR6151e-p3	aatccgagccccacattcatc	3'	New	gp1a	........((((((((((.(((.(((((((((......)))))))))))).))))))))))...........	53	44.4	-33.4	1	148.833	188.833	188.35	222.15	220.667	241.917	157.845	189.447	180.592	219.753	212.263	240.396	middle
121	214	nta-miR6151a	TGAATGTGAGGCATTGGATTGA	22	NW_015926428.1	+	10589	10659	attcgttggaTGAATGTGAGGCATTGGATTGAtttcgttcAATCCGAGCCCTACATTCATCaggggttcgt	1	nta-MIR6151c,	nta-MIR6151c	attcgttggaTGAATGTGAGGCATTGGATTGAtttcgttcaatccgagccctacattcatcaggggttcgt	nta-miR6151a	TGAATGTGAGGCATTGGATTGA	5'	Yes	gp1a	........(((((((((..(((.(((((((((......))))))))))))..)))))))))..........	53	45.1	-31.2	1	3.8	2.475	0	1.6	1.6	3	4.03009	2.48305	0	1.58273	1.53906	2.98114	low
121	215	nta-MIR6151c-p3	AATCCGAGCCCTACATTCATC	21	NW_015926428.1	+	10589	10659	attcgttggaTGAATGTGAGGCATTGGATTGAtttcgttcAATCCGAGCCCTACATTCATCaggggttcgt	1	nta-MIR6151c,	nta-MIR6151c	attcgttggaTGAATGTGAGGCATTGGATTGAtttcgttcaatccgagccctacattcatcaggggttcgt	nta-MIR6151c-p3	aatccgagccctacattcatc	3'	New	gp1a	........(((((((((..(((.(((((((((......))))))))))))..)))))))))..........	53	45.1	-31.2	1	24	34	34.3333	38	43.6667	40	25.4532	34.1106	32.9192	37.5899	42.0036	39.7486	middle
122	216	nta-miR6151a	TGAATGTGAGGCATTGGATTGA	22	NW_015953156.1	-	12257	12327	attcgttggaTGAATGTGAGGCATTGGATTGAtttcgttcAATCCGAGCCCTACATTCATCcggggtttgt	1	nta-MIR6151a,	nta-MIR6151a	attcgttggaTGAATGTGAGGCATTGGATTGAtttcgttcaatccgagccctacattcatccggggtttgt	nta-miR6151a	TGAATGTGAGGCATTGGATTGA	5'	Yes	gp1a	......(((((((((((..(((.(((((((((......))))))))))))..)))))))))))........	57	45.1	-34.5	1.1	3.8	2.475	0	1.6	1.6	3	4.03009	2.48305	0	1.58273	1.53906	2.98114	low
122	217	nta-MIR6151a-p3	AATCCGAGCCCTACATTCATC	21	NW_015953156.1	-	12257	12327	attcgttggaTGAATGTGAGGCATTGGATTGAtttcgttcAATCCGAGCCCTACATTCATCcggggtttgt	1	nta-MIR6151a,	nta-MIR6151a	attcgttggaTGAATGTGAGGCATTGGATTGAtttcgttcaatccgagccctacattcatccggggtttgt	nta-MIR6151a-p3	aatccgagccctacattcatc	3'	New	gp1a	......(((((((((((..(((.(((((((((......))))))))))))..)))))))))))........	57	45.1	-34.5	1.1	24	34	34.3333	38	43.6667	40	25.4532	34.1106	32.9192	37.5899	42.0036	39.7486	middle
123	218	nta-miR6151f	TGAGTGTGAGGCATTGGATTGA	22	NW_015917845.1	-	62373	62443	attcgttggaTGAGTGTGAGGCATTGGATTGAttttgttcAATCCGAGCCCCACATTCATCaggggttcgt	1	nta-MIR6151f,	nta-MIR6151f	attcgttggaTGAGTGTGAGGCATTGGATTGAttttgttcaatccgagccccacattcatcaggggttcgt	nta-miR6151f	TGAGTGTGAGGCATTGGATTGA	5'	Yes	gp1a	........((((((((((.(((.(((((((((......)))))))))))).))))))))))..........	53	46.5	-33.4	1	22	20	21	18	18	17	23.3321	20.065	20.1351	17.8057	17.3145	16.8931	middle
123	219	nta-MIR6151f-p3	AATCCGAGCCCCACATTCATC	21	NW_015917845.1	-	62373	62443	attcgttggaTGAGTGTGAGGCATTGGATTGAttttgttcAATCCGAGCCCCACATTCATCaggggttcgt	1	nta-MIR6151f,	nta-MIR6151f	attcgttggaTGAGTGTGAGGCATTGGATTGAttttgttcaatccgagccccacattcatcaggggttcgt	nta-MIR6151f-p3	aatccgagccccacattcatc	3'	New	gp1a	........((((((((((.(((.(((((((((......)))))))))))).))))))))))..........	53	46.5	-33.4	1	148.833	188.833	188.35	222.15	220.667	241.917	157.845	189.447	180.592	219.753	212.263	240.396	middle
124	220	nta-miR6151g	TGAGTGTGAGGCGTTGGATTGA	22	NW_015787262.1	-	28984	29054	attcgttggaTGAGTGTGAGGCGTTGGATTGAtttcactcAATCCGAGCCCCACATTCATCagaggctcat	1	nta-MIR6151i,	nta-MIR6151i	attcgttggaTGAGTGTGAGGCGTTGGATTGAtttcactcaatccgagccccacattcatcagaggctcat	nta-miR6151g	TGAGTGTGAGGCGTTGGATTGA	5'	Yes	gp1a	........((((((((((.(((.(((((((((......)))))))))))).))))))))))..........	53	47.9	-32.6	1	116	89.2083	122.667	122.333	99	112	123.024	89.4984	117.614	121.013	95.2296	111.296	middle
124	221	nta-MIR6151i-p3	AATCCGAGCCCCACATTCATC	21	NW_015787262.1	-	28984	29054	attcgttggaTGAGTGTGAGGCGTTGGATTGAtttcactcAATCCGAGCCCCACATTCATCagaggctcat	1	nta-MIR6151i,	nta-MIR6151i	attcgttggaTGAGTGTGAGGCGTTGGATTGAtttcactcaatccgagccccacattcatcagaggctcat	nta-MIR6151i-p3	aatccgagccccacattcatc	3'	New	gp1a	........((((((((((.(((.(((((((((......)))))))))))).))))))))))..........	53	47.9	-32.6	1	148.833	188.833	188.35	222.15	220.667	241.917	157.845	189.447	180.592	219.753	212.263	240.396	middle
125	222	nta-miR6151a	TGAATGTGAGGCATTGGATTGA	22	NW_015818420.1	-	28483	28553	atttattggaTGAATGTGAGGCATTGGATTGAtttcactcAATCCGAGCCCCACATTCATCaggggttcgt	1	nta-MIR6151d,	nta-MIR6151d	atttattggaTGAATGTGAGGCATTGGATTGAtttcactcaatccgagccccacattcatcaggggttcgt	nta-miR6151a	TGAATGTGAGGCATTGGATTGA	5'	Yes	gp1a	........((((((((((.(((.(((((((((......)))))))))))).))))))))))..........	53	43.7	-32.6	1.1	3.8	2.475	0	1.6	1.6	3	4.03009	2.48305	0	1.58273	1.53906	2.98114	low
125	223	nta-MIR6151d-p3	AATCCGAGCCCCACATTCATC	21	NW_015818420.1	-	28483	28553	atttattggaTGAATGTGAGGCATTGGATTGAtttcactcAATCCGAGCCCCACATTCATCaggggttcgt	1	nta-MIR6151d,	nta-MIR6151d	atttattggaTGAATGTGAGGCATTGGATTGAtttcactcaatccgagccccacattcatcaggggttcgt	nta-MIR6151d-p3	aatccgagccccacattcatc	3'	New	gp1a	........((((((((((.(((.(((((((((......)))))))))))).))))))))))..........	53	43.7	-32.6	1.1	148.833	188.833	188.35	222.15	220.667	241.917	157.845	189.447	180.592	219.753	212.263	240.396	middle
126	224	nta-MIR6152b-p5_1ss10AG	ATTCACGGCGTGAAATAGGGGATT	24	NW_015912946.1	-	88424	88527	ctggacagattattgtattcgactgtATTCACGGCGTGAAATAGGGGATTatactgtttttaaaatggaaagtgAATCAATTAACATAATAGACTCCTaatata	1	nta-MIR6152b,	nta-MIR6152b	ctggacagatTATTGTATTCGACTGTATTCACGGcatgaaataggggattatactgtttttaaaatggaaagtgaatcaattaacataatagactcctaatata	nta-MIR6152b-p5	ATTCACGGcatgaaataggggatt	5'	New	gp1a	...(((((.....((((.((..((((.(((((...)))))))))..)).)))))))))............((.((.((.((((...)))).)).))))......	55	31.7	-14.3	0.4	93	159.5	161.5	159.5	221.5	169.5	98.6311	160.019	154.848	157.779	213.064	168.434	middle
126	225	nta-MIR6152b-p3	AATCAATTAACATAATAGACTCCT	24	NW_015912946.1	-	88424	88527	ctggacagattattgtattcgactgtATTCACGGCGTGAAATAGGGGATTatactgtttttaaaatggaaagtgAATCAATTAACATAATAGACTCCTaatata	1	nta-MIR6152b,	nta-MIR6152b	ctggacagatTATTGTATTCGACTGTATTCACGGcatgaaataggggattatactgtttttaaaatggaaagtgaatcaattaacataatagactcctaatata	nta-MIR6152b-p3	aatcaattaacataatagactcct	3'	New	gp1a	...(((((.....((((.((..((((.(((((...)))))))))..)).)))))))))............((.((.((.((((...)))).)).))))......	55	31.7	-14.3	0.4	13	21	19.5	10.5	28.5	11	13.7871	21.0683	18.6968	10.3867	27.4146	10.9309	middle
127	226	nta-MIR6152b-p5_2ss16TC18GA	ATTCACGGCATGAAACAAGGGATT	24	NW_015900468.1	+	12428	12475	gtATTCACGGCATGAAACAAGGGATTacactgtttttaaacggaaagt	1	nta-MIR6152b,	nta-MIR6152b	ctggacagatTATTGTATTCGACTGTATTCACGGcatgaaataggggattatactgtttttaaaatggaaagtgaatcaattaacataatagactcctaatata	nta-MIR6152b-p5	ATTCACGGcatgaaataggggatt	5'	New	gp1a	...(((.((....((((((.(........)))))))....)))))...	42	37.5	-6.8	0.4	2.5	0	0	2.5	2.5	3	2.65137	0	0	2.47302	2.40479	2.98114	low
128	227	nta-MIR6152b-p3_2ss16TC18GA	ATTCACGGCATGAAACAAGGGATT	24	NW_015816209.1	+	13465	13544	gtattcatggcgtgaaacatgggattacagttgggtagattattgtattcgactatATTCACGGCATGAAACAAGGGATT	2	nta-MIR6152b,nta-MIR6152b,	nta-MIR6152b	ctggacagatTATTGTATTCGACTGTATTCACGGcatgaaataggggattatactgtttttaaaatggaaagtgaatcaattaacataatagactcctaatata	nta-MIR6152b-p3	ATTCACGGcatgaaataggggatt	3'	New	gp1a	((.((((((.((((((..((((((.((((((..........)))))).))..)))).)))))).))))))))........	72	38.8	-22.5	0.7	2.5	0	0	2.5	2.5	3	2.65137	0	0	2.47302	2.40479	2.98114	low
129	228	nta-MIR6152a-p5	AGATTATTGTATTCGACTGTATTC	24	NW_015875398.1	-	16247	16351	ttggacAGATTATTGTATTCGACTGTATTCacggcgtgaaataggggattacactgttttttaaaacggaaagtgAATCAATTAACATAATAGACTCCTaatata	1	nta-MIR6152a,	nta-MIR6152a	ttggacagatTATTGTATTCGACTGTATTCACGGcgtgaaatagggattacactgttttttaaacggaaagtgaatcaattaacataatagactcctaatata	nta-MIR6152a-p5	agatTATTGTATTCGACTGTATTC	5'	New	gp1a	..(((...(((((.(((.((..((((.(((((...)))))))))..)).))).((((((....)))))).................)))))....))).......	38	32.4	-17.9	0.5	150	203.5	295.5	280.5	240.5	225.5	159.082	204.162	283.329	277.473	231.34	224.082	middle
129	229	nta-MIR6152a-p3	AATCAATTAACATAATAGACTCCT	24	NW_015875398.1	-	16247	16351	ttggacAGATTATTGTATTCGACTGTATTCacggcgtgaaataggggattacactgttttttaaaacggaaagtgAATCAATTAACATAATAGACTCCTaatata	1	nta-MIR6152a,	nta-MIR6152a	ttggacagatTATTGTATTCGACTGTATTCACGGcgtgaaatagggattacactgttttttaaacggaaagtgaatcaattaacataatagactcctaatata	nta-MIR6152a-p3	aatcaattaacataatagactcct	3'	New	gp1a	..(((...(((((.(((.((..((((.(((((...)))))))))..)).))).((((((....)))))).................)))))....))).......	38	32.4	-17.9	0.5	13	21	19.5	10.5	28.5	11	13.7871	21.0683	18.6968	10.3867	27.4146	10.9309	middle
130	230	nta-miR6153	TAGGACCATATTCACTATTTG	21	NW_015788875.1	+	11353	11456	tgatacagttTAGGACCATATTCACTATTTGatgattaacaaaatatgatcatcaccttttactctttgagcaaGTAGTGAAAATGGTTCTAAATtgttttgga	1	nta-MIR6153,	nta-MIR6153	tgatacagttTAGGACCATATTCACTATTTGatgattaacaaaatatgatcatcaccttttactctttgagcaagtagtgaaaatggttctaaattgttttgga	nta-miR6153	TAGGACCATATTCACTATTTG	5'	Yes	gp1a	.((.(((((((((((((((.((((((((((((((((((........))))))))........(((...))).)))))))))).))))))))))))))).))...	100	29.8	-37.9	1.2	429	547	464	268	674	342	454.976	548.779	444.889	265.108	648.33	339.85	middle
130	231	nta-MIR6153-p3	GTAGTGAAAATGGTTCTAAAT	21	NW_015788875.1	+	11353	11456	tgatacagttTAGGACCATATTCACTATTTGatgattaacaaaatatgatcatcaccttttactctttgagcaaGTAGTGAAAATGGTTCTAAATtgttttgga	1	nta-MIR6153,	nta-MIR6153	tgatacagttTAGGACCATATTCACTATTTGatgattaacaaaatatgatcatcaccttttactctttgagcaagtagtgaaaatggttctaaattgttttgga	nta-MIR6153-p3	gtagtgaaaatggttctaaat	3'	New	gp1a	.((.(((((((((((((((.((((((((((((((((((........))))))))........(((...))).)))))))))).))))))))))))))).))...	100	29.8	-37.9	1.2	23	31	21	12	37	7	24.3926	31.1008	20.1351	11.8705	35.5908	6.956	middle
131	232	nta-MIR6154a-p5	CCTTACTCCAGGTAGATCCACC	22	NW_015938250.1	-	76084	76164	tcccaatagcCCTTACTCCAGGTAGATCCACCagaacatgaagttcaaggTGGGTCTCCTGGAGAAAGGTCctttggtggt	2	nta-MIR6154a,nta-MIR6154b,	nta-MIR6154a	tcccaatagcccttactccaggtagatccaccagaacatgaagttcaaggTGGGTCTCCTGGAGAAAGGTCctttggtggt	nta-MIR6154a-p5	ccttactccaggtagatccacc	5'	New	gp1a	((((((....((((.(((((((.(((((((((.((((.....))))..)))))))))))))))).))))....)))).)).	80	50.6	-41.5	1	36	85	40	31	124	60	38.1798	85.2764	38.3525	30.6655	119.277	59.6228	middle
131	233	nta-miR6154a	TGGGTCTCCTGGAGAAAGGTC	21	NW_015938250.1	-	76084	76164	tcccaatagcCCTTACTCCAGGTAGATCCACCagaacatgaagttcaaggTGGGTCTCCTGGAGAAAGGTCctttggtggt	2	nta-MIR6154a,nta-MIR6154b,	nta-MIR6154b	aactccatagccttactccaggtagatccaccagaacatgaagttcaaggTGGGTCTCCTGGAGAAAGGTCctttggtgg	nta-miR6154a	TGGGTCTCCTGGAGAAAGGTC	3'	Yes	gp1a	((((((....((((.(((((((.(((((((((.((((.....))))..)))))))))))))))).))))....)))).)).	80	50.6	-41.5	1	81	101	44	34	102	31	85.9045	101.328	42.1878	33.6331	98.1153	30.8051	middle
132	234	nta-miR6155	TAAGGTTGCCTTGCTCTTGCA	21	NW_015843498.1	-	5080	5201	gcaggtgtgaTAAGGTTGCCTTGCTCTTGCAttctcttagataatttgattcagcttgctgcctgaattaaattttttggtagagagaATTCGAGAGCAAGGCTACCTCATGatacgtgcag	1	nta-MIR6155,	nta-MIR6155	gcaggtgtgaTAAGGTTGCCTTGCTCTTGCAttctcttagataatttgattcagcttgctgcctgaattaaattttttggtagagagaattcgagagcaaggctacctcatgatacgtgcag	nta-miR6155	TAAGGTTGCCTTGCTCTTGCA	5'	Yes	gp1a	(((.((((.((.((((.((((((((((((.(((((((((((.(((((((((((((.....).)))))))))))).)))....)))))))).)))))))))))).)))).)).)))).)))..	120	41.8	-61.3	1.2	24610	19198	28624	27881	24250	25645	26100.1	19260.4	27445.1	27580.1	23326.4	25483.8	high
132	235	nta-MIR6155-p3_2ss10CT21CT	ATTCGAGAGTAAGGCTACCTTATG	24	NW_015843498.1	-	5080	5201	gcaggtgtgaTAAGGTTGCCTTGCTCTTGCAttctcttagataatttgattcagcttgctgcctgaattaaattttttggtagagagaATTCGAGAGCAAGGCTACCTCATGatacgtgcag	1	nta-MIR6155,	nta-MIR6155	gcaggtgtgaTAAGGTTGCCTTGCTCTTGCAttctcttagataatttgattcagcttgctgcctgaattaaattttttggtagagagaattcgagagcaaggctacctcatgatacgtgcag	nta-MIR6155-p3	attcgagagcaaggctacctcatg	3'	New	gp1a	(((.((((.((.((((.((((((((((((.(((((((((((.(((((((((((((.....).)))))))))))).)))....)))))))).)))))))))))).)))).)).)))).)))..	120	41.8	-61.3	1.2	80	100	130	136	162	145	84.8439	100.325	124.646	134.532	155.83	144.089	middle
133	236	nta-MIR6156-p5	AATAGGACATCTTCAACACTC	21	NW_015876491.1	-	2047	2153	gtcaccaaacagaAATAGGACATCTTCAACACTCtgcaatggtattctgaataacaacagatgcctttgcggagtgTTGAAGATGTTCTATTTCTGTtcgatgatgg	1	nta-MIR6156,	nta-MIR6156	gtcaccaaacagaaataggacatcttcaacactctgcaatggtattctgaataacaacagatgcctttgcggagtgTTGAAGATGTTCTATTTCTGTtcgatgatgg	nta-MIR6156-p5	aataggacatcttcaacactc	5'	New	gp1a	((((...((((((((((((((((((((((((((((((((.(((((.(((........)))))))).))))))))))))))))))))))))))))))))...))))..	105	40.2	-63.7	1.5	0	6	0	0	5	0	0	6.01951	0	0	4.80957	0	low
133	237	nta-miR6156	TTGAAGATGTTCTATTTCTGT	21	NW_015876491.1	-	2047	2153	gtcaccaaacagaAATAGGACATCTTCAACACTCtgcaatggtattctgaataacaacagatgcctttgcggagtgTTGAAGATGTTCTATTTCTGTtcgatgatgg	1	nta-MIR6156,	nta-MIR6156	gtcaccaaacagaaataggacatcttcaacactctgcaatggtattctgaataacaacagatgcctttgcggagtgTTGAAGATGTTCTATTTCTGTtcgatgatgg	nta-miR6156	TTGAAGATGTTCTATTTCTGT	3'	Yes	gp1a	((((...((((((((((((((((((((((((((((((((.(((((.(((........)))))))).))))))))))))))))))))))))))))))))...))))..	105	40.2	-63.7	1.5	0	0	6	0	7	0	0	0	5.75288	0	6.7334	0	low
134	238	nta-miR6157_L+2R+1_1ss23GA	AATGGTAGACGTAGGATTTGAAAAC	25	NW_015844605.1	+	46109	46172	ttcggattAATGGTAGACGTAGGATTTGAAGACTTTAAATCCTAGTCTTCCATTtgtcttagaa	1	nta-MIR6157,	nta-MIR6157	ttcggattaaTGGTAGACGTAGGATTTGAAGActttaaatcctagtcttccatttgtcttagaa	nta-miR6157	TGGTAGACGTAGGATTTGAAGA	5'	Diff	gp1a	...(((..(((((.((((.(((((((((((...))))))))))))))).)))))..))).....	56	34.4	-23.6	1.1	6	5	0	5	0	0	6.36329	5.01626	0	4.94604	0	0	low
134	239	nta-MIR6157-p3	TTTAAATCCTAGTCTTCCATT	21	NW_015844605.1	+	46109	46172	ttcggattAATGGTAGACGTAGGATTTGAAGACTTTAAATCCTAGTCTTCCATTtgtcttagaa	1	nta-MIR6157,	nta-MIR6157	ttcggattaaTGGTAGACGTAGGATTTGAAGActttaaatcctagtcttccatttgtcttagaa	nta-MIR6157-p3	tttaaatcctagtcttccatt	3'	New	gp1a	...(((..(((((.((((.(((((((((((...))))))))))))))).)))))..))).....	56	34.4	-23.6	1.1	17	27	46	23	63	18	18.0293	27.0878	44.1054	22.7518	60.6006	17.8868	middle
135	240	nta-MIR6158a-p5	TTCGATTTGTACGAAGGGCATG	22	NW_015901104.1	+	2016	2173	caagatgcccaagTTCGATTTGTACGAAGGGCATGgcgatcctatggcacatctacggggcttttgtagcaaaatgaggggagcagggggaaaagatgagctactgatagcTTACTTTGGCCAGAGTTTGAGCgggtcggcactggagtggtatacaa	1	nta-MIR6158a,	nta-MIR6158a	caagatgcccAAGTTCGATTTGTACGAAGGGCatggcgatcctatggcacatctacggggcttttgtagcaaaatgaggggagcagggggaaatgatgagctactgatagcttactttggccagagtttgagcgggtcggcactggagtggtatacaa	nta-MIR6158a-p5	TTCGATTTGTACGAAGGGCatg	5'	New	gp1a	....(((((..((((((((..(..((((.....((((..((((...((...(((.((..(((.....)))....)))))...))...))))((((.(((((((....))))))))))).))))...))))..)..))))).))).....)))))....	150	50.6	-43.2	0.5	87	101.5	146.5	92	109.5	98.5	92.2678	101.83	140.466	91.0072	105.33	97.8808	middle
135	241	nta-MIR6158a-p3	TTACTTTGGCCAGAGTTTGAGC	22	NW_015901104.1	+	2016	2173	caagatgcccaagTTCGATTTGTACGAAGGGCATGgcgatcctatggcacatctacggggcttttgtagcaaaatgaggggagcagggggaaaagatgagctactgatagcTTACTTTGGCCAGAGTTTGAGCgggtcggcactggagtggtatacaa	1	nta-MIR6158a,	nta-MIR6158a	caagatgcccAAGTTCGATTTGTACGAAGGGCatggcgatcctatggcacatctacggggcttttgtagcaaaatgaggggagcagggggaaatgatgagctactgatagcttactttggccagagtttgagcgggtcggcactggagtggtatacaa	nta-MIR6158a-p3	ttactttggccagagtttgagc	3'	New	gp1a	....(((((..((((((((..(..((((.....((((..((((...((...(((.((..(((.....)))....)))))...))...))))((((.(((((((....))))))))))).))))...))))..)..))))).))).....)))))....	150	50.6	-43.2	0.5	80.5	102.5	111.5	75.5	75	104	85.3742	102.833	106.908	74.6852	72.1436	103.346	middle
136	242	nta-MIR6158b-p5	TTCGATTTGTACGAAGGGCATG	22	NW_015824423.1	-	875	1033	tcaaaatgcccaagTTCGATTTGTACGAAGGGCATGgcgatcctatggcacatctacggggcttttgtagcaaaatgaggggagcagggggcaaagatgagctactgatagcttactttggccagagtTTGAGCGGGTCGGCACTGGAGTggtatacaa	2	nta-MIR6158b,nta-MIR6158c,	nta-MIR6158b	tcaaaatgcccAAGTTCGATTTGTACGAAGGGCatggcaatcctatggcacatctacggggcttttgtagcaaaatgaggggagcagggagaaaagatgagctactgatagcttactttggccagaatttgagcgggtcggcactggagtggtatacaa	nta-MIR6158b-p5	TTCGATTTGTACGAAGGGCatg	5'	New	gp1a	.....(((((..((((((((..(..((((.......((..((((.........((((..(...)..)))).......))))..))...((.(((((.(((((((....)))))))))))).))....))))..)..))))).))).....)))))....	150	50.3	-46	0.6	87	101.5	146.5	92	109.5	98.5	92.2678	101.83	140.466	91.0072	105.33	97.8808	middle
136	243	nta-MIR6158b-p3	TTGAGCGGGTCGGCACTGGAGT	22	NW_015824423.1	-	875	1033	tcaaaatgcccaagTTCGATTTGTACGAAGGGCATGgcgatcctatggcacatctacggggcttttgtagcaaaatgaggggagcagggggcaaagatgagctactgatagcttactttggccagagtTTGAGCGGGTCGGCACTGGAGTggtatacaa	2	nta-MIR6158b,nta-MIR6158c,	nta-MIR6158b	tcaaaatgcccAAGTTCGATTTGTACGAAGGGCatggcaatcctatggcacatctacggggcttttgtagcaaaatgaggggagcagggagaaaagatgagctactgatagcttactttggccagaatttgagcgggtcggcactggagtggtatacaa	nta-MIR6158b-p3	ttgagcgggtcggcactggagt	3'	New	gp1a	.....(((((..((((((((..(..((((.......((..((((.........((((..(...)..)))).......))))..))...((.(((((.(((((((....)))))))))))).))....))))..)..))))).))).....)))))....	150	50.3	-46	0.6	17.5	20.5	21.5	15.5	10	18	18.5596	20.5667	20.6145	15.3327	9.61915	17.8868	middle
137	244	nta-miR6159	TAGCATAGAATTCTCGCACCTA	22	NW_015808360.1	-	85545	85647	aacgagaaatagggcgagaattctaggcaaatgacttggagttacatctatccagaccaattgaagggcatTAGCATAGAATTCTCGCACCTAttccttgttc	1	nta-MIR6159,	nta-MIR6159	aacgagaaatagggcgagaattctaggcaaatgacttggagttacatctatccagaccaattgaagggcatTAGCATAGAATTCTCGCACCTAttccttgttc	nta-miR6159	TAGCATAGAATTCTCGCACCTA	3'	Yes	gp1a	((((((.((((((((((((((((((.((.((((..(((((..........))))).((.......)).)))).)).)))))))))))).)))))).)))))).	102	41.7	-41.5	1	1183	1459	1490	1810	2183	1797	1254.63	1463.74	1428.63	1790.47	2099.86	1785.7	high
138	245	nta-MIR6160-p5	ATATGGGCCAACTGTGTAACTCTA	24	NW_015925440.1	-	12718	12793	ttcgaaaagggcatATATGGGCCAACTGTGTAACTCTAAGGGTATATATGGACCAactatgtgacggtaagggcat	1	nta-MIR6160,	nta-MIR6160	ttcgaaaaggGCATATATGGGCCAACTGTGTAACtctaagggtatatatggaccaactatgtgacggtaagggcat	nta-MIR6160-p5	ATATGGGCCAACTGTGTAACtcta	5'	New	gp1a	...........(((((((((.(((..((((((.((.....))))))))))).)))..)))))).............	52	43.4	-13.7	0.4	236	260	271	265	246	274	250.29	260.845	259.838	262.14	236.631	272.278	middle
138	246	nta-MIR6160-p3_1ss12TC	AACTCTAAGGGCATATATGGACCA	24	NW_015925440.1	-	12718	12793	ttcgaaaagggcatATATGGGCCAACTGTGTAACTCTAAGGGTATATATGGACCAactatgtgacggtaagggcat	1	nta-MIR6160,	nta-MIR6160	ttcgaaaaggGCATATATGGGCCAACTGTGTAACtctaagggtatatatggaccaactatgtgacggtaagggcat	nta-MIR6160-p3	AACtctaagggtatatatggacca	3'	New	gp1a	...........(((((((((.(((..((((((.((.....))))))))))).)))..)))))).............	52	43.4	-13.7	0.4	833	1009	951	1003	895	1048	883.437	1012.28	911.831	992.176	860.914	1041.41	middle
139	247	nta-MIR6161a-p5_1ss20TC	ATTTTGCTGCAACAGAGACCGGTC	24	NW_015859277.1	-	56242	56352	ATTTTGCTGCAACAGAGACTGGTCcagcataatatattggagttcggtgcacctgtgtatgaactccagcatATTATGCTGGACCGGTATACTTTGctgactccagtataa	1	nta-MIR6161a,	nta-MIR6161a	attttgctgcaacagagactggtccagcataatatattggagttcggtgcacctgtgtatgaactccagcatattatGCTGGACCGGTATACTTTGCTGACtccagtataa	nta-MIR6161a-p5	attttgctgcaacagagactggtc	5'	New	gp1a	....(((((((.(((((((((((((((((((((((..(((((((((.((((....)))))))))))))..))))))))))))))))))...))))).))....)))))...	104	43.2	-55.8	1.2	822.333	1057	1299.83	1533.17	1297.17	1379.33	872.125	1060.44	1246.3	1516.62	1247.76	1370.66	middle
139	248	nta-MIR6161a-p3_2ss23TG24GC	ATTATGCTGGACCGGTATACTTGC	24	NW_015859277.1	-	56242	56352	ATTTTGCTGCAACAGAGACTGGTCcagcataatatattggagttcggtgcacctgtgtatgaactccagcatATTATGCTGGACCGGTATACTTTGctgactccagtataa	1	nta-MIR6161a,	nta-MIR6161a	attttgctgcaacagagactggtccagcataatatattggagttcggtgcacctgtgtatgaactccagcatattatGCTGGACCGGTATACTTTGCTGACtccagtataa	nta-MIR6161a-p3	attatGCTGGACCGGTATACTTTG	3'	New	gp1a	....(((((((.(((((((((((((((((((((((..(((((((((.((((....)))))))))))))..))))))))))))))))))...))))).))....)))))...	104	43.2	-55.8	1.2	400.333	491.833	654.167	712.833	633.333	633.833	424.573	493.433	627.223	705.141	609.213	629.849	middle
140	249	nta-MIR6161b-p5_1ss20TC	ATTTTGCTGCAACAGAGACCGGTC	24	NW_015859277.1	-	56135	56352	ATTTTGCTGCAACAGAGACTGGTCcagcataatatattggagttcggtgcacctgtgtatgaactccagcatATTATGCTGGACCGGTATACTTTGctgactccagtataatatactagagactggagagtctagcataatatattggagttcggtgcacctgtgtatgaactccagcatattatgctggaccggtatactttgctgactccagtata	1	nta-MIR6161b,	nta-MIR6161b	attttgctgcaacagagactggtccagcataatatattggagttcggtgcacctgtgtatgaactccagcatattatGCTGGACCGGTATACTTTGCTGACtccagtataatatactagagactggagagtctagcataatatattggagttcggtgcacctgtgtatgaactccagcatattatGCTGGACCGGTATACTTTGCTGACtccagtatat	nta-MIR6161b-p5	attttgctgcaacagagactggtc	5'	New	gp1a	....(((((((.(((((((((((((((((((((((..(((((((((.(((((..((((((((((((((..(((((((((((((((((((.....))))).(((((((..............))))))).))))))))))))))..)))))))).))))))..))))))))))))))..))))))))))))))))))...))))).))....)))))..	212	42.7	-111.7	1.2	822.333	1057	1299.83	1533.17	1297.17	1379.33	872.125	1060.44	1246.3	1516.62	1247.76	1370.66	middle
140	250	nta-MIR6161b-p3_2ss23TG24GC	ATTATGCTGGACCGGTATACTTGC	24	NW_015859277.1	-	56135	56352	ATTTTGCTGCAACAGAGACTGGTCcagcataatatattggagttcggtgcacctgtgtatgaactccagcatATTATGCTGGACCGGTATACTTTGctgactccagtataatatactagagactggagagtctagcataatatattggagttcggtgcacctgtgtatgaactccagcatattatgctggaccggtatactttgctgactccagtata	1	nta-MIR6161b,	nta-MIR6161b	attttgctgcaacagagactggtccagcataatatattggagttcggtgcacctgtgtatgaactccagcatattatGCTGGACCGGTATACTTTGCTGACtccagtataatatactagagactggagagtctagcataatatattggagttcggtgcacctgtgtatgaactccagcatattatGCTGGACCGGTATACTTTGCTGACtccagtatat	nta-MIR6161b-p3	attatGCTGGACCGGTATACTTTG	3'	New	gp1a	....(((((((.(((((((((((((((((((((((..(((((((((.(((((..((((((((((((((..(((((((((((((((((((.....))))).(((((((..............))))))).))))))))))))))..)))))))).))))))..))))))))))))))..))))))))))))))))))...))))).))....)))))..	212	42.7	-111.7	1.2	400.333	491.833	654.167	712.833	633.333	633.833	424.573	493.433	627.223	705.141	609.213	629.849	middle
141	251	nta-miR6161c	AATATACTGGAGTTCGGTGCACCT	24	NW_015933463.1	+	15908	15975	catccagcatAATATACTGGAGTTCGGTGCACCTATGTATGAACTTCCAGCAtattatgctggaccgg	1	nta-MIR6161c,	nta-MIR6161c	catccagcatAATATACTGGAGTTCGGTGCACCTatgtatgaacttccagcatattatgctggaccgg	nta-miR6161c	AATATACTGGAGTTCGGTGCACCT	5'	Yes	gp1a	..(((((((((((((.((((((((((.((((....))))))))).))))).)))))))))))))....	62	45.6	-34	1.1	772.667	1008.33	1089.67	1129	1247.83	1233.67	819.451	1011.61	1044.79	1116.82	1200.31	1225.91	middle
141	252	nta-MIR6161c-p3_1ss7AG	GCACCTGTGTATGAACTTCCAGCA	24	NW_015933463.1	+	15908	15975	catccagcatAATATACTGGAGTTCGGTGCACCTATGTATGAACTTCCAGCAtattatgctggaccgg	1	nta-MIR6161c,	nta-MIR6161c	catccagcatAATATACTGGAGTTCGGTGCACCTatgtatgaacttccagcatattatgctggaccgg	nta-MIR6161c-p3	GCACCTatgtatgaacttccagca	3'	New	gp1a	..(((((((((((((.((((((((((.((((....))))))))).))))).)))))))))))))....	62	45.6	-34	1.1	528.667	670.667	843.667	915.667	1165.67	1120.67	560.677	672.847	808.918	905.785	1121.27	1113.62	middle
142	253	nta-miR6161d_L+3	ACTTGAACTCCAGCATATTATACT	24	NW_015927448.1	-	35843	35931	taagtatGCTTGAACTCCAGCATATTATACTggagttccagcaagtataattgtctagtatAATATACTGGAGTTTGGAACACCAatgc	1	nta-MIR6161d,	nta-MIR6161d	taagtatgctTGAACTCCAGCATATTATACTggagttccagcaagtataaattgtctagtataatatactggagtttggaacaccaatgc	nta-miR6161d	TGAACTCCAGCATATTATACT	5'	Diff	gp1a	.........(..((((((((.((((((((((((.......((((......)))))))))))))))).))))))))..)...........	69	36	-29	0.9	62	109	133	172	158	158	65.754	109.354	127.522	170.144	151.983	157.007	middle
142	254	nta-MIR6161d-p3_2ss19AG24AG	AATATACTGGAGTTTGGAGCACCG	24	NW_015927448.1	-	35843	35931	taagtatGCTTGAACTCCAGCATATTATACTggagttccagcaagtataattgtctagtatAATATACTGGAGTTTGGAACACCAatgc	1	nta-MIR6161d,	nta-MIR6161d	taagtatgctTGAACTCCAGCATATTATACTggagttccagcaagtataaattgtctagtataatatactggagtttggaacaccaatgc	nta-MIR6161d-p3	aatatactggagtttggaacacca	3'	New	gp1a	.........(..((((((((.((((((((((((.......((((......)))))))))))))))).))))))))..)...........	69	36	-29	0.9	66	98	122	90	152	72	69.9962	98.3187	116.975	89.0287	146.211	71.5474	middle
143	255	nta-miR6162_L+1R-1	TAGAAAAATGGTAGCCATTGG	21	NW_015920838.1	+	17060	17135	gataaatatTAGAAAAATGGTAGCCATTGGattaaagttttgatcCAAGGGCTTCCATTTTTCTGAtttttaatag	1	nta-MIR6162,	nta-MIR6162	gataaatattAGAAAAATGGTAGCCATTGGAttaaagttttgatccaagggcttccatttttctgatttttaatag	nta-miR6162	AGAAAAATGGTAGCCATTGGA	5'	Diff	gp1a	..((((.(((((((((((((.((((.(((((((((....))))))))).)))).))))))))))))).))))....	70	28.9	-34.2	1.6	18	0	5	5	15	0	19.0899	0	4.79406	4.94604	14.4287	0	middle
143	256	nta-MIR6162-p3	CAAGGGCTTCCATTTTTCTGA	21	NW_015920838.1	+	17060	17135	gataaatatTAGAAAAATGGTAGCCATTGGattaaagttttgatcCAAGGGCTTCCATTTTTCTGAtttttaatag	1	nta-MIR6162,	nta-MIR6162	gataaatattAGAAAAATGGTAGCCATTGGAttaaagttttgatccaagggcttccatttttctgatttttaatag	nta-MIR6162-p3	caagggcttccatttttctga	3'	New	gp1a	..((((.(((((((((((((.((((.(((((((((....))))))))).)))).))))))))))))).))))....	70	28.9	-34.2	1.6	83	109	134	102	102	77	88.0256	109.354	128.481	100.899	98.1153	76.516	middle
144	257	nta-MIR6163-p5_1ss20AG	TTATGGCATGTACGTTTGGGTC	22	NW_015866356.1	+	9	111	tgagtcaaatgatTTATGGCATGTACGTTTGGATCatgtcaattataaaaccttgtgaaaaaTGATTAACTTGGAAGTACTGCCtaagtttgaatgcgcaaaa	1	nta-MIR6163,	nta-MIR6163	tgagtcaaatgatttatggcatgtacgtttggatcatgtcaattataaaaccttgtgaaaaatgattaactTGGAAGTACTGCCTAAGTTTGAatgcgcaaaa	nta-MIR6163-p5	ttatggcatgtacgtttggatc	5'	New	gp1a	((.((.....((((((.((((.((((.((..((((((.....((((((....))))))...)))))....)..)).)))))))))))))).....)).))...	100	33	-20.5	0.6	368	329	293	209	286	293	390.282	330.07	280.932	206.745	275.108	291.158	middle
144	258	nta-MIR6163-p3	TGATTAACTTGGAAGTACTGCC	22	NW_015866356.1	+	9	111	tgagtcaaatgatTTATGGCATGTACGTTTGGATCatgtcaattataaaaccttgtgaaaaaTGATTAACTTGGAAGTACTGCCtaagtttgaatgcgcaaaa	1	nta-MIR6163,	nta-MIR6163	tgagtcaaatgatttatggcatgtacgtttggatcatgtcaattataaaaccttgtgaaaaatgattaactTGGAAGTACTGCCTAAGTTTGAatgcgcaaaa	nta-MIR6163-p3	tgattaactTGGAAGTACTGCC	3'	New	gp1a	((.((.....((((((.((((.((((.((..((((((.....((((((....))))))...)))))....)..)).)))))))))))))).....)).))...	100	33	-20.5	0.6	113	159	81	54	177	92	119.842	159.517	77.6638	53.4172	170.259	91.4217	middle
145	259	nta-MIR6164a-p5_1ss21AG	TTTTTAGTCCGTGCCAAAAAGAAT	24	NW_015800675.1	-	49756	49985	attataactctccgtttcaatttatgtgaacttatttccTTTTTAGTCCGTGCCAAAAAAAATgatatctttccttatttggaaacaatttaactttatgcaacgatttatagtcacacaaaatatatgtgcctcattttataccacaagttcaaaaatcttctctctttttttAAACTTCGTGCCCAGTCAAATAGGttcacataaattgaaacggaggagtaggaatt	1	nta-MIR6164a,	nta-MIR6164a	attataactctccgtttcaatttatgtgaacttatttcctttttagtccgtgccaaaaaaaatgatatctttccttatttggaaacaatttaactttatgcaacgatttatagtcacacaaaatatatgtgcctcattttataccacaagttcaaaaatcttctctctttttttaaacttcgtgcccagtcaaataggtTCACATAAATTGAAACGGAGGagtaggaatt	nta-MIR6164a-p5	tttttagtccgtgccaaaaaaaat	5'	New	gp1a	......(((((((((((((((((((((((((((((((.....................(((((((....(((((......)))))...............................((((.......))))..)))))))....((((((((.(((((...........))))).))))).))).......)))))))))))))))))))))))))))).))).......	82	30.4	-59.1	0.8	277.5	378.5	530.5	509.5	523	413	294.302	379.731	508.65	504.002	503.081	410.404	middle
145	260	nta-MIR6164a-p3_2ss6TC21TC	AAACTCCGTGCCCAGTCAAACAGG	24	NW_015800675.1	-	49756	49985	attataactctccgtttcaatttatgtgaacttatttccTTTTTAGTCCGTGCCAAAAAAAATgatatctttccttatttggaaacaatttaactttatgcaacgatttatagtcacacaaaatatatgtgcctcattttataccacaagttcaaaaatcttctctctttttttAAACTTCGTGCCCAGTCAAATAGGttcacataaattgaaacggaggagtaggaatt	1	nta-MIR6164a,	nta-MIR6164a	attataactctccgtttcaatttatgtgaacttatttcctttttagtccgtgccaaaaaaaatgatatctttccttatttggaaacaatttaactttatgcaacgatttatagtcacacaaaatatatgtgcctcattttataccacaagttcaaaaatcttctctctttttttaaacttcgtgcccagtcaaataggtTCACATAAATTGAAACGGAGGagtaggaatt	nta-MIR6164a-p3	aaacttcgtgcccagtcaaatagg	3'	New	gp1a	......(((((((((((((((((((((((((((((((.....................(((((((....(((((......)))))...............................((((.......))))..)))))))....((((((((.(((((...........))))).))))).))).......)))))))))))))))))))))))))))).))).......	82	30.4	-59.1	0.8	1778.5	2446	2381.5	3317	1917	3444	1886.19	2453.95	2283.41	3281.2	1843.99	3422.35	high
146	261	nta-MIR6164b-p5	ACCTTTATGCAATGATTTATAGCC	24	NW_015914718.1	-	12569	12802	ttttttattactccctccgtttcaatttatgtgaacctatttcctttttagtccatgccaaaaagaatgacctctttccttatttggaaacaatttACCTTTATGCAATGATTTATAGCCacacaaaatatatgtgtctcattttacaccacaagttcaaaagtattctcttttcttAAACTCCGTGCCCAGTCAAATGGGttcacataaattgaaacggagggagtacaacat	1	nta-MIR6164b,	nta-MIR6164b	ttttttattactccctccgtttcaatttatgtgaacctatttcctttttagtccatgccaaaaagaatgacctctttccttatttggaaacaatttacctttatgcaatgatttatagccacacaaaatatatgtgtctcattttacaccacaagttcaaaagtattctcttttcttaaactccgtgcccagtcaaatgggtTCACATAAATTGAAACGGAGGgagtacaacat	nta-MIR6164b-p5	acctttatgcaatgatttatagcc	5'	New	gp1a	........(((((((((((((((((((((((((((((((((..((((((.((....)).))))))..((((...(((((......)))))..............(((..((((((.....(((((.......))))).....................(((((......)))))..)))).))..)))...)))))))))))))))))))))))))))))))))))))......	84	33.8	-72.3	0.9	912.5	1115.5	1299.5	1438.5	1159	1438	967.751	1119.13	1245.98	1422.98	1114.86	1428.96	middle
146	262	nta-MIR6164b-p3_2ss21TC22GA	AAACTCCGTGCCCAGTCAAACAGG	24	NW_015914718.1	-	12569	12802	ttttttattactccctccgtttcaatttatgtgaacctatttcctttttagtccatgccaaaaagaatgacctctttccttatttggaaacaatttACCTTTATGCAATGATTTATAGCCacacaaaatatatgtgtctcattttacaccacaagttcaaaagtattctcttttcttAAACTCCGTGCCCAGTCAAATGGGttcacataaattgaaacggagggagtacaacat	1	nta-MIR6164b,	nta-MIR6164b	ttttttattactccctccgtttcaatttatgtgaacctatttcctttttagtccatgccaaaaagaatgacctctttccttatttggaaacaatttacctttatgcaatgatttatagccacacaaaatatatgtgtctcattttacaccacaagttcaaaagtattctcttttcttaaactccgtgcccagtcaaatgggtTCACATAAATTGAAACGGAGGgagtacaacat	nta-MIR6164b-p3	aaactccgtgcccagtcaaatggg	3'	New	gp1a	........(((((((((((((((((((((((((((((((((..((((((.((....)).))))))..((((...(((((......)))))..............(((..((((((.....(((((.......))))).....................(((((......)))))..)))).))..)))...)))))))))))))))))))))))))))))))))))))......	84	33.8	-72.3	0.9	1778.5	2446	2381.5	3317	1917	3444	1886.19	2453.95	2283.41	3281.2	1843.99	3422.35	high
2	2	ptc-miR167a_R+2_1	TGAAGCTGCCAGCATGATCTAAC	23	NW_015858372.1	+	53256	53352	ccactagcagtTGAAGCTGCCAGCATGATCTAAActtcccttttgtttcatctatcaaggaaagatcagatcatgtggcagtctcacctgttgatgg	2	ptc-MIR167a,mes-MIR167b,	ptc-MIR167a	cactagcagtTGAAGCTGCCAGCATGATCTAacttccttgcttctttatcaaggatggatttagatcatgtggtggtttcacctgttga	ptc-miR167a	TGAAGCTGCCAGCATGATCTA	5'	Diff	gp1b	(((..(((((.(((..((((((.((((((((...(((.((((..............)))).)))...))))))))))))))..))).)))))..)))	97	44.3	-39.7	0.9	9	0	0	5	0	10	9.54494	0	0	4.94604	0	9.93714	low
3	3	stu-miR167b-3p_L+3	TCAGATCATGTGGCAGCATCACC	23	NW_015919678.1	+	82640	82713	tgaagctgccagcatgatctaaacttttctagttgctccgatgaggaaagaTCAGATCATGTGGCAGCATCACC	1	stu-MIR167b,	stu-MIR167b	TGAAGCTGCCAGCATGATCTAaacttttctattgctctgtacgaggaaagatcaGATCATGTGGCAGCATCACC	stu-miR167b-3p	GATCATGTGGCAGCATCACC	3'	Diff	gp1b	(((.(((((((.((((((((...(((((((..(((...)))..)))))))...))))))))))))))).)))..	72	45.9	-33.5	1	194	205	221	168	246	252	205.747	205.667	211.898	166.187	236.631	250.416	middle
5	5	sly-miR171e	TTGAGCCGCGTCAATATCTCT	21	NW_015927449.1	+	1079	1182	aggaagatatatagagatattgatgcgactcaatctgaagacgtgattatatataaatataatcagccatgtgattttgaTTGAGCCGCGTCAATATCTCTctt	1	sly-MIR171e,	sly-MIR171e	taggaagatatatatagatattgatgcggttcaatctgaaagacatggttagatatgtaattagccttgtaattttggaTTGAGCCGCGTCAATATCTCTcttccta	sly-miR171e	TTGAGCCGCGTCAATATCTCT	3'	Yes	gp1b	............(((((((((((((((.(((((((..((.((((((((((((....)))))))))....)))..))..))))))).)))))))))))))))...	89	33.7	-40.7	1.2	13	24	15	8	29	23	13.7871	24.078	14.3822	7.91367	27.8955	22.8554	middle
6	6	stu-miR171d-5p	AGATATTGGTGCGGTTCAATT	21	NW_015796259.1	-	19111	19199	atacgAGATATTGGTGCGGTTCAATTagaaagccgagttctttttgttttagaactctgtTATTTGATTGAGCCGTGCCAAtatcacgt	7	stu-MIR171d,sly-MIR171b,mes-MIR171c,bra-MIR171a,bna-MIR171e,cas-MIR171c,ssl-MIR171a,	stu-MIR171d	AGATATTGGTGCGGTTCAATTagaaagcacacttctttatatatagaacttcgttatttaaTTGAGCCGTGCCAATATCACG	stu-miR171d-5p	AGATATTGGTGCGGTTCAATT	5'	Yes	gp1b	..(((.((((((((..(((((((((((((.(((.(((((((.........))))))).))).)))))))))))))..)))))))).)))	87	38.2	-48	1.4	11	11	16	15	39	23	11.666	11.0358	15.341	14.8381	37.5147	22.8554	middle
6	7	ssl-MIR171a-p3	TATTTGATTGAGCCGTGCCAA	21	NW_015796259.1	-	19111	19199	atacgAGATATTGGTGCGGTTCAATTagaaagccgagttctttttgttttagaactctgtTATTTGATTGAGCCGTGCCAAtatcacgt	7	stu-MIR171d,sly-MIR171b,mes-MIR171c,bra-MIR171a,bna-MIR171e,cas-MIR171c,ssl-MIR171a,	ssl-MIR171a	cgagatattggtgcggttcaatttgaaagccgtgctcaataggcttagagctcggttatttgaTTGAGCCGTGCCAATATCACG	ssl-MIR171a-p3	tatttgaTTGAGCCGTGCCAA	3'	New	gp1b	..(((.((((((((..(((((((((((((.(((.(((((((.........))))))).))).)))))))))))))..)))))))).)))	87	38.2	-48	1.4	0	0	0	0	5	0	0	0	0	0	4.80957	0	low
7	8	mdm-miR171g_L+1	CTGATTGAGCCGTGCCAATATC	22	NW_015813904.1	-	4288	4364	gatgttggaatggctcaatcaaatcaaattccccaaatatttgtgtcatttaatTTGATTGAGCCGTGCCAATATCa	6	mdm-MIR171m,mdm-MIR171h,mdm-MIR171n,mdm-MIR171o,mdm-MIR171g,rco-MIR171e,	mdm-MIR171g	gatgttggtatggttcaatcaaataaaatctctcaaaatttgggtcctttaattTGATTGAGCCGTGCCAATATC	mdm-miR171g	TGATTGAGCCGTGCCAATATC	3'	Diff	gp1b	((((((((.(((((((((((((((.((((....(((....)))....)))).))))))))))))))).)))))))).	76	35.1	-34.2	1.3	41	80	56	52	72	118	43.4825	80.2601	53.6935	51.4388	69.2579	117.258	middle
8	9	mes-MIR319h-p5	AGAGCTTCCTTCAGCCCACTC	21	NW_015826954.1	+	60157	60331	agAGAGCTTCCTTCAGCCCACTCatggaggagaactggggttgaattagctgccgactcattcatccaaccactcagtagaaagggatatattttgtgctactgtgattgagtgaatgatgcgggagatagttttctattcctctctttccttgcTTGGACTGAAGGGAGCTCCT	1	mes-MIR319h,	mes-MIR319h	gagagagcttccttcagcccactcatggatggggttaaaggggctgaactatctgccgactcattcatttgagcactagtagacaaagagttactattttagctactgtggttgtgtgaatgatgcgggagataattttgcatccctctttttctgtgCTTGGACTGAAGGGAGCTCCTc	mes-MIR319h-p5	agagcttccttcagcccactc	5'	New	gp1b	((.(((((((((((((.(((..((.((((((((...((..(.((((((.((.(((..(((((((..(((.(((..(((((..(..(.....)..)...)))))))).)))..)))))))..))).)).))))))...)..)))))).)))).))..))).)))))))))))))))	175	46.3	-72.4	0.9	3.5	0	3	3	3	0	3.71192	0	2.87644	2.96762	2.88574	0	low
8	10	mes-miR319h_L-1	TTGGACTGAAGGGAGCTCCT	20	NW_015826954.1	+	60157	60331	agAGAGCTTCCTTCAGCCCACTCatggaggagaactggggttgaattagctgccgactcattcatccaaccactcagtagaaagggatatattttgtgctactgtgattgagtgaatgatgcgggagatagttttctattcctctctttccttgcTTGGACTGAAGGGAGCTCCT	1	mes-MIR319h,	mes-MIR319h	gagagagcttccttcagcccactcatggatggggttaaaggggctgaactatctgccgactcattcatttgagcactagtagacaaagagttactattttagctactgtggttgtgtgaatgatgcgggagataattttgcatccctctttttctgtgCTTGGACTGAAGGGAGCTCCTc	mes-miR319h	CTTGGACTGAAGGGAGCTCCT	3'	Diff	gp1b	((.(((((((((((((.(((..((.((((((((...((..(.((((((.((.(((..(((((((..(((.(((..(((((..(..(.....)..)...)))))))).)))..)))))))..))).)).))))))...)..)))))).)))).))..))).)))))))))))))))	175	46.3	-72.4	0.9	122	175.333	242.333	58	245.333	92	129.387	175.903	232.352	57.3741	235.99	91.4217	middle
9	11	stu-MIR319b-p5	AGCTCCTTTCAGGCCAAGACC	21	NW_015912893.1	-	50712	50884	gAGCTCCTTTCAGGCCAAGACCgagggtcgaggaacggcaagagctgccatgtcatgcatattggttaagctcaacaaattactagcaaaatcgttaagaataaccagttgcatgagaggggagcaactacttccgttaacttgccccacttaTTGGACTGAAGGGAGCTCCT	1	stu-MIR319b,	stu-MIR319b	gagctcctttcaggccaagaccgagggacgaggagcggcatgagctgcctagtcatgcatattggttaaccttaacaaacatatatatagagtgttaagaataaccagttgcatgccaagggagcaactacttccgctaacttgtctcacttaTTGGACTGAAGGGAGCTCCT	stu-MIR319b-p5	agctcctttcaggccaagacc	5'	New	gp1b	(((((((((((((.((((......(((.((((.(((((.(((.(((.((...(((((((.((((((((..((.(((.................))).))..)))))))))))))))...)).))).....))))))))..)))))))......)))).)))))))))))))..	171	48	-72.7	0.9	0	0	0	0	7	0	0	0	0	0	6.7334	0	low
9	12	stu-miR319b	TTGGACTGAAGGGAGCTCCT	20	NW_015912893.1	-	50712	50884	gAGCTCCTTTCAGGCCAAGACCgagggtcgaggaacggcaagagctgccatgtcatgcatattggttaagctcaacaaattactagcaaaatcgttaagaataaccagttgcatgagaggggagcaactacttccgttaacttgccccacttaTTGGACTGAAGGGAGCTCCT	1	stu-MIR319b,	stu-MIR319b	gagctcctttcaggccaagaccgagggacgaggagcggcatgagctgcctagtcatgcatattggttaaccttaacaaacatatatatagagtgttaagaataaccagttgcatgccaagggagcaactacttccgctaacttgtctcacttaTTGGACTGAAGGGAGCTCCT	stu-miR319b	TTGGACTGAAGGGAGCTCCT	3'	Yes	gp1b	(((((((((((((.((((......(((.((((.(((((.(((.(((.((...(((((((.((((((((..((.(((.................))).))..)))))))))))))))...)).))).....))))))))..)))))))......)))).)))))))))))))..	171	48	-72.7	0.9	122	175.333	242.333	58	245.333	92	129.387	175.903	232.352	57.3741	235.99	91.4217	middle
10	13	sly-MIR319c-p5_1ss9AC	AGCTGCCGCCTCATTCATCCA	21	NW_015923055.1	-	47149	47337	ggaatggtctaagagagcttccttcagcccactcatggaggagaactggggttgaattAGCTGCCGCCTCATTCATCCAaccactcagtagaaaggaataggttttgtgctactgtgattgagtgaatgatgcgggagatagttttctattcctctctttccttgcTTGGACTGAAGGGAGCTCCTTtt	1	sly-MIR319c,	sly-MIR319c	ggaatggtccaagAGAGCTTCCTTCAGCCCACTCacggaggagaaatggggttgaattagctgccgactcattcatccaaccactcagtagaaaggataggttttgtgctactgtgattgagtgaatgatgcgggagatagttttctatccctctctttccttgCTTGGACTGAAGGGAGCTCCttttccccatt	sly-MIR319c-p5	agctgccgactcattcatcca	5'	New	gp1b	..........(((.(((((((((((((.(((..((.((((((((...((..(.((((((.((.((((.(((((((..(((.(((..((((.((((.......)))).))))...))).)))..))))))).)))).)).))))))...)..)))))).)))).))..))).))))))))))))))))..	177	46.6	-76.5	0.9	11.5	11	34	22	14	21	12.1963	11.0358	32.5996	21.7626	13.4668	20.868	middle
10	14	sly-miR319a_L-1R+2	TTGGACTGAAGGGAGCTCCTT	21	NW_015923055.1	-	47149	47337	ggaatggtctaagagagcttccttcagcccactcatggaggagaactggggttgaattAGCTGCCGCCTCATTCATCCAaccactcagtagaaaggaataggttttgtgctactgtgattgagtgaatgatgcgggagatagttttctattcctctctttccttgcTTGGACTGAAGGGAGCTCCTTtt	1	sly-MIR319c,	sly-MIR319c	ggaatggtccaagAGAGCTTCCTTCAGCCCACTCacggaggagaaatggggttgaattagctgccgactcattcatccaaccactcagtagaaaggataggttttgtgctactgtgattgagtgaatgatgcgggagatagttttctatccctctctttccttgCTTGGACTGAAGGGAGCTCCttttccccatt	sly-miR319a	CTTGGACTGAAGGGAGCTCC	3'	Diff	gp1b	..........(((.(((((((((((((.(((..((.((((((((...((..(.((((((.((.((((.(((((((..(((.(((..((((.((((.......)))).))))...))).)))..))))))).)))).)).))))))...)..)))))).)))).))..))).))))))))))))))))..	177	46.6	-76.5	0.9	430.5	342.333	698.333	355	553.333	368	456.566	343.446	669.571	351.169	532.259	365.687	middle
11	15	peu-MIR2916-p5_2ss5AG20TG	GGGGGCTCGAAGACGATCAGATACC	25	NW_015805964.1	+	822	912	tGGGGGCTCGAAGACGATCAGATACCgtcctagtctcaaccataaacgatgccgaccagggatcggcgGATGTTGCTTTTAGGACTCCGCC	1	peu-MIR2916,	peu-MIR2916	TGGGGACTCGAAGACGATCATATaccatcctagtctcaaccataaacgatgccgaccagggattggcggatgttgcttctaggagtccgcca	peu-MIR2916-p5	GGGGACTCGAAGACGATCATATacc	5'	New	gp1b	.((.((.(((....))).........(((((((...((((......((((.((.....)).))))......))))...))))))).)).))	90	56	-26.2	0.5	5815	4677	2702	3510	1995	2400	6167.09	4692.21	2590.71	3472.12	1919.02	2384.91	high
11	16	peu-MIR2916-p3_2ss11CT17GC	GATGTTGCTTTTAGGACTCCGCC	23	NW_015805964.1	+	822	912	tGGGGGCTCGAAGACGATCAGATACCgtcctagtctcaaccataaacgatgccgaccagggatcggcgGATGTTGCTTTTAGGACTCCGCC	1	peu-MIR2916,	peu-MIR2916	TGGGGACTCGAAGACGATCATATaccatcctagtctcaaccataaacgatgccgaccagggattggcggatgttgcttctaggagtccgcca	peu-MIR2916-p3	gatgttgcttctaggagtccgcc	3'	New	gp1b	.((.((.(((....))).........(((((((...((((......((((.((.....)).))))......))))...))))))).)).))	90	56	-26.2	0.5	9660	7193	3885	5240	2938	3770	10244.9	7216.39	3724.99	5183.45	2826.11	3746.3	high
12	17	rgl-MIR5141-p3_1ss2GA	AACGGCAGACCCGACGCGACTGAC	24	NW_015787701.1	+	67948	68109	ttgagtaatgcctgagtcgcagcatcaaggtctgagccaaattgagcaagggcggccacttcgcgatattgtgccaattccagttttgaactaccgcagacttgtttcatagttttcaactgAGCGGCAGACCCGACGCGACTGACagataagccgacgtta	1	rgl-MIR5141,	rgl-MIR5141	ttgagtaatgcctgagtcgcagcatcaaggtctgagccaaattgagcaaaggcggccacttcgcgatattgtgccaattccagttttgaactaccgcatacttgtttcatagctttcaactgagcggcAGACCCGACGCGACTGACAGATAAgccgacgtta	rgl-MIR5141-p3	agcggcAGACCCGACGCGACTGAC	3'	New	gp1b	....((...(((((((((((....((..((((((.((..(((((.((((..((((.....))))....))))..))))).(((((..((((((..((......))....))))))..))))).))..)))))).)).))))))..)))....))..))....	154	50	-40	0.5	23	30	66	50	51	55	24.3926	30.0975	63.2816	49.4604	49.0576	54.6543	middle
13	18	stu-MIR5303d-p5_1ss7TC	TCGGATCCTCCAAAAATACACT	22	NW_015883311.1	-	28508	28562	acccgtaTCGGATTCTCCAAAAATACACTACTTTTGGAGAATCCgacacgcaccc	2	stu-MIR5303d,stu-MIR5303c,	stu-MIR5303d	acccgtctcggattctccaaaaatacactacTTTTGGAGAATCCGACACGCACCC	stu-MIR5303d-p5	tcggattctccaaaaatacact	5'	New	gp1b	...(((.(((((((((((((((.........))))))))))))))).))).....	47	47.3	-25.2	1	7	0	9	0	6	5	7.42384	0	8.62931	0	5.77149	4.96857	low
13	19	stu-MIR5303d-p3_2ss5AG20AG	AAATGCACTACTTTTGGAGGATCC	24	NW_015883311.1	-	28508	28562	acccgtaTCGGATTCTCCAAAAATACACTACTTTTGGAGAATCCgacacgcaccc	2	stu-MIR5303d,stu-MIR5303c,	stu-MIR5303d	acccgtctcggattctccaaaaatacactacTTTTGGAGAATCCGACACGCACCC	stu-MIR5303d-p3	aaatacactacTTTTGGAGAATCC	3'	New	gp1b	...(((.(((((((((((((((.........))))))))))))))).))).....	47	47.3	-25.2	1	37	12	55	16	40	49	39.2403	12.039	52.7347	15.8273	38.4766	48.692	middle
14	20	gma-MIR5368-p5_2ss20TC23CT	CCTGGGATTGGCTTTGGGCCTTT	23	NW_015944047.1	+	5969	6135	actgttcCCTGGGATTGGCTTTGGGCTTTTcctgcgcagcttaggtggagggcgaagaaggcctccttccggggggggccgagccatcagtgagataccactctgaaagagcTAGAATTCTAACCTTGTGCCAGGAcctacgggccaagggacagtctcaggtagac	1	gma-MIR5368,	gma-MIR5368	actgtttcctgggattggctttgggctttcctgcacagcttaggtggagggcaaagaagacttccttctgagggggccagagccatcagagagataccactctggacgagctagaattctaaccttgtgccaggacctatgggccgagGGACAGTCTCAGGTAGACAgt	gma-MIR5368-p5	cctgggattggctttgggctttc	5'	New	gp1b	.......((((((((((.((((((.((..(((((.(((.(..(((((((((((......((((((((.....))))))))..)))...((((......))))...............)))).)))).))))))))).....)).))))))..)))))))))).....	155	57.5	-65.2	0.7	11575	8756	7198	8499	4171	4744	12275.9	8784.47	6901.53	8407.28	4012.15	4714.18	high
14	21	gma-MIR5368-p3_1ss19CT	TAGAATTCTAACCTTGTGTCAGGA	24	NW_015944047.1	+	5969	6135	actgttcCCTGGGATTGGCTTTGGGCTTTTcctgcgcagcttaggtggagggcgaagaaggcctccttccggggggggccgagccatcagtgagataccactctgaaagagcTAGAATTCTAACCTTGTGCCAGGAcctacgggccaagggacagtctcaggtagac	1	gma-MIR5368,	gma-MIR5368	actgtttcctgggattggctttgggctttcctgcacagcttaggtggagggcaaagaagacttccttctgagggggccagagccatcagagagataccactctggacgagctagaattctaaccttgtgccaggacctatgggccgagGGACAGTCTCAGGTAGACAgt	gma-MIR5368-p3	tagaattctaaccttgtgccagga	3'	New	gp1b	.......((((((((((.((((((.((..(((((.(((.(..(((((((((((......((((((((.....))))))))..)))...((((......))))...............)))).)))).))))))))).....)).))))))..)))))))))).....	155	57.5	-65.2	0.7	12420	10643	7721	9710	4368	5812	13172	10677.6	7402.99	9605.21	4201.64	5775.46	high
15	22	stu-miR7997c_L-3_1ss13CT	TTGCTCGGATTCTTCAAAAAT	21	NW_015955147.1	+	78542	78655	TTGCTCGGACTCTTCAAAAATgttgacgggtgcatgtcggatcctccaaaagtagtgcatttttggaggatccgacacgggtgcggcaatattTTTGGAGAGTCCGAGCAACAT	1	stu-MIR7997c,	stu-MIR7997c	ATATTGCTCGGACTCTTCAAAAATgttgatagatgcatgtcaaatcttctaaaaagtagtgcatttttggaagattctacactaatatggcaatatttttggagagtccgagcaacattt	stu-miR7997c	ATATTGCTCGGACTCTTCAAAAAT	5'	Diff	gp1b	(((((((((((((((((((((((((....(..(.(((((((((((((((((((.....)))))))))))))))))))...)..)..)))))))))))))))))))))))))...	111	48.2	-73.3	1.3	24	19	40	33	31	22	25.4532	19.0618	38.3525	32.6439	29.8194	21.8617	middle
15	23	stu-MIR7997c-p3_1ss11CT	TTTGGAGAGTTCGAGCAACAT	21	NW_015955147.1	+	78542	78655	TTGCTCGGACTCTTCAAAAATgttgacgggtgcatgtcggatcctccaaaagtagtgcatttttggaggatccgacacgggtgcggcaatattTTTGGAGAGTCCGAGCAACAT	1	stu-MIR7997c,	stu-MIR7997c	ATATTGCTCGGACTCTTCAAAAATgttgatagatgcatgtcaaatcttctaaaaagtagtgcatttttggaagattctacactaatatggcaatatttttggagagtccgagcaacattt	stu-MIR7997c-p3	tttggagagtccgagcaacat	3'	New	gp1b	(((((((((((((((((((((((((....(..(.(((((((((((((((((((.....)))))))))))))))))))...)..)..)))))))))))))))))))))))))...	111	48.2	-73.3	1.3	263	253	368	360	290	266	278.924	253.823	352.843	356.115	278.955	264.328	middle
16	24	stu-MIR8005a-p5_1ss1GT	TTTAGGGTTTAGGGTTTAGGG	21	NW_015793075.1	+	65728	65856	TTTAGGGTTTAGGGTTTAGGGtttaggGTTTAGGGTTTAGGGTTTAGGGTTtaaggtttagggtttagggtttagggtttaggggttaggggtttaggggtttaggggtttagggtttagggtttaggg	1	stu-MIR8005a,	stu-MIR8005a	TTTAGAGTTTAAGGTTTAGAGTTTaaggtttggggtttagggtttagggttaagagtatcatggttagggtttagggtttaggggttaggatatagggtttaggatttagggtttagagtttagggt	stu-MIR8005a-p5	gttagggtttagggtttaggg	5'	New	gp1b	..................................................(((((..((((...))))..)))))......................................................	1	44.2	1.6	0	72	97	125	75	118	109	76.3595	97.3154	119.852	74.1906	113.506	108.315	middle
16	25	stu-MIR8005a-p3_1ss5GA	GTTTAGGGTTTAGGGTTTAGGGTT	24	NW_015793075.1	+	65728	65856	TTTAGGGTTTAGGGTTTAGGGtttaggGTTTAGGGTTTAGGGTTTAGGGTTtaaggtttagggtttagggtttagggtttaggggttaggggtttaggggtttaggggtttagggtttagggtttaggg	1	stu-MIR8005a,	stu-MIR8005a	TTTAGAGTTTAAGGTTTAGAGTTTaaggtttggggtttagggtttagggttaagagtatcatggttagggtttagggtttaggggttaggatatagggtttaggatttagggtttagagtttagggt	stu-MIR8005a-p3	gtttggggtttagggtttagggtt	3'	New	gp1b	..................................................(((((..((((...))))..)))))......................................................	1	44.2	1.6	0	0	15	10	15	20	17	0	15.0488	9.58813	14.8381	19.2383	16.8931	middle
17	26	stu-miR8016	ATTTTTGAATGGAAGGCCCATGTG	24	NW_015902873.1	+	177013	177079	catggtcttttctttcaaaaatatattatataagttactatatATTTTTGAATGGAAGGCCCATGTG	1	stu-MIR8016,	stu-MIR8016	catggtcttttctttcaaaaatatattatattaggagttgctatatATTTTTGAATGGAAGGCCCATGTG	stu-miR8016	ATTTTTGAATGGAAGGCCCATGTG	3'	Yes	gp1b	(((((.((((((.(((((((((((((..((.....))..))))))))))))).)))))).)))))..	65	26.9	-24.1	1.3	150	177	197	191	228	223	159.082	177.576	188.886	188.939	219.317	221.598	middle
1	1	gma-MIR156g-p3_1ss1TC	CTGTGCTCTCTATCTTCTGTC	21	NW_015799498.1	+	14764	14897	ataaaaaagggagctgaggatgatgacagaagaataaagagcacaaaagagtgaggtgcagaaaattttcagcacttcattatCTGTGCTCTCTATCTTCTGTCaacaacatctctcactgcttcctttttata	1	gma-MIR156g,	gma-MIR156g	tgaacaatatcttgaacagtttgTTGACAGAAGATAGAGAGCACaggtgatcatacccaaaaaagcttttgtgtgtgagcagttttgtgctctctatcttctgtcaatgtacttctca	gma-MIR156g-p3	ttgtgctctctatcttctgtc	3'	New	gp2a	...(((((((((((((((((((.((((((((((.((.((((((((....((((((((((.(((....))).))))))))))...)))))))).))))))))))))....)))).))))..)))))))))))...	128	37.3	-65	1.3	0	0	8	2.5	3.5	2.5	0	0	7.6705	2.47302	3.3667	2.48428	low
2	1	gma-MIR156g-p3_1ss1TC	CTGTGCTCTCTATCTTCTGTC	21	NW_015841047.1	+	11750	11890	taaaggtagggaagggctgaggatgatgacagaagactagagagcacaaaggattaaggtgcagaaagcttccaattagcatcttatcatcatCTGTGCTCTCTATCTTCTGTCaacagcatctcccacttgcctcctctc	1	gma-MIR156g,	gma-MIR156g	tgaacaatatcttgaacagtttgTTGACAGAAGATAGAGAGCACaggtgatcatacccaaaaaagcttttgtgtgtgagcagttttgtgctctctatcttctgtcaatgtacttctca	gma-MIR156g-p3	ttgtgctctctatcttctgtc	3'	New	gp2a	...(((.(((.(((((..((...((.((((((((((.(((((((((((...(((((((((((................))))))))..)))...))))))))))))))))))))).))...))..)).))).))))))...	135	45.4	-61.8	1	0	0	8	2.5	3.5	2.5	0	0	7.6705	2.47302	3.3667	2.48428	low
3	2	vvi-MIR156h-p5_2ss13GT22TC	AATGACAGAAGATAGAGAGCAC	22	NW_015799498.1	-	13218	13306	tATTGACAGAAGATAGAGAGCACagataatgaagtgcatgaaaattgtctgcaccacacttctttgtgctctttattcttctgtcatca	1	vvi-MIR156h,	vvi-MIR156h	tgcctcacaaTGACAGAAGAGAGAGAGCATgctggtgggaaaacaattacaacttttgatcatctgatctggaaatgcttgtaagcggcattctcttggattgtaatctgaattctgcctctatcatcaacctgcccacaaacgatttccttcaactgagtgcctttccggcttgagccttctgcatgatcagctgagttctttctgcgcctttcattgtgtcctgcc	vvi-MIR156h-p5	aaTGACAGAAGAGAGAGAGCAT	5'	New	gp2a	...(((((((((((((((((((((((.((((..(((((.((......)))))))..)).)).)))))))))))))).)))))))))...	83	37.1	-40.5	1.2	5	8	0	0	0	0	5.30275	8.02601	0	0	0	0	low
4	3	mtr-miR156g-5p	TTGACAGAAGATAGAGGGCAC	21	NW_015799498.1	-	14395	14555	tttaataattttgttaaaagaggaggcagtgagagatgttgTTGACAGAAGATAGAGAGCACagataatgaagtgcatgaaaattgtctgcacctcactcctttgtgctctttattcttctgtcatcatcctcatctcccttttttaatgtgtttgttttg	2	mtr-MIR156g,cme-MIR156e,	mtr-MIR156g	ggttgTTGACAGAAGATAGAGGGCACtaaggatgatatgcatacacatatatatacaacatggaggaggagcttaattgcatttcatttcctttgtGCTCTCTAGACTTCTGTCATCacc	mtr-miR156g-5p	TTGACAGAAGATAGAGGGCAC	5'	Yes	gp2a	...(((((....(((((((((((..(..(((((.((((....(((((((((((((((((((((((...(((.(((((.((......))))))).)))....)))))))))))))).))))))))).))))))))))..)))))))))))....)))))...	155	36	-64.4	1.1	20	7.5	14.5	3.5	7.5	5.5	21.211	7.52439	13.9028	3.46223	7.21436	5.46543	middle
5	4	mtr-miR156e_1ss17AG	TTGACAGAAGATAGAGGGCAC	21	NW_015799498.1	-	14804	14976	ctaattgcatttcctgatataaaaaggaagcagtgagagatgttgTTGACAGAAGATAGAGAGCACagataatgaagtgctgaaaattttctgcacctcactcttttgtgctctttattcttctgtcatcatcctcagctcccttttttatgtgtttgtattggtgcaatccg	4	mtr-MIR156f,mtr-MIR156g,csi-MIR156d,cme-MIR156e,	mtr-MIR156f	gtttgTTGACAGAAGATAGAGAGCACatctgaacaaacacaaaagacattgtgtttgaacagttgtgtgctctctgctcttctgccaacatact	mtr-miR156e	TTGACAGAAGATAGAGAGCAC	5'	Diff	gp2a	...(((((((.....((((((((((((.(((..((((.((((....(((((((((((((((((((((((...(((.((((.(((....))).)))).)))....)))))))))))))).))))))))).))))))))))).))))))...)))))).......)))))))...	167	38.2	-68.4	1	20	7.5	14.5	3.5	7.5	5.5	21.211	7.52439	13.9028	3.46223	7.21436	5.46543	middle
6	5	ptc-miR156l_R+2_1ss13GA	TTGACAGAAGATAGAGAGCACAT	23	NW_015841047.1	-	11816	11956	aaaagagaggaggcaagtgggagatgctgTTGACAGAAGATAGAGAGCACAGatgatgataagatgctaattggaagctttctgcaccttaatcctttgtgctctctagtcttctgtcatcatcctcagcccttccctacc	4	ptc-MIR156l,mtr-MIR156f,csi-MIR156i,csi-MIR156g,	ptc-MIR156l	gTTGACAGAAGATGGAGAGCACagctacatgtaatcgagaattagtcctgtagaagtgcagtttgtgctttgtgttttcttttcttctttaaac	ptc-miR156l	TTGACAGAAGATGGAGAGCAC	5'	Diff	gp2a	...((.((((.(((...((((.((((....(((((((((((((((((((((((.(((..((((.(((................))).))))))).))))))))))))).)))))))))).))))))))))))))).))...	135	45.4	-59.1	0.9	12	8	10	3	17.5	0	12.7266	8.02601	9.58813	2.96762	16.8335	0	middle
7	6	csi-miR156i-5p_L+4_1ss20TG	GATCTTGACAGAAGATAGAGAGCAC	25	NW_015848029.1	-	5478	5608	aaaggaggcaagtgggaGATGTTGACAGAAGATAGAGAGCACagatgatgataagatgctaactggaagctttctgcatcttaatcatttgtgctctctagtcttctgtcatcatcctcagcccctcccta	4	csi-MIR156i,fve-MIR156f,cca-MIR156c,han-MIR156c,	csi-MIR156i	gaaattttgTTGACAGAAGATAGATAGCACataaattaaaatgccattaatcaaacgcattttaaatctttgagctctctgtattccgtcatcaacgtgca	csi-miR156i-5p	TTGACAGAAGATAGATAGCAC	5'	Diff	gp2a	...(((((....((((.((((.(((((((((((((((((((((((((((..((((((((................))))))))))))))))))))))))).)))))))))).))))))))...)))))...	125	44.3	-69.8	1.2	2.5	18	2.5	3	28.5	10	2.65137	18.0585	2.39703	2.96762	27.4146	9.93714	middle
8	7	ptc-miR156l_2ss6AG13GA	TTGACGGAAGATAGAGAGCAC	21	NW_015891370.1	-	30349	30518	gtaaggagtatagaggaagtgggcaaaaaagggtgacaattgTTGACAGAAGATAGAGAGCACtaatgatgatatgctaagtaaatgtaggggcaaaagcatctcaattcatttgtgctctctatgcttctgtcatcaccttcggccaactatccctctcttctcttaac	3	ptc-MIR156l,csi-MIR156g,csi-MIR156d,	ptc-MIR156l	gTTGACAGAAGATGGAGAGCACagctacatgtaatcgagaattagtcctgtagaagtgcagtttgtgctttgtgttttcttttcttctttaaac	ptc-miR156l	TTGACAGAAGATGGAGAGCAC	5'	Diff	gp2a	((.(((((...(((((.(((.(((.....(((((((.......((((((((((((((((((((.((((((((.(((((..((..........))...))))).)))..))))).))))))))))).))))))))))))))))..))).)))...)))))...))))).))	170	41.2	-68.7	1	7.5	8	0	0	7.5	0	7.95412	8.02601	0	0	7.21436	0	low
9	8	han-miR156a_L+2	AATGACAGAAGAGAGTGAGCAC	22	NW_015898031.1	-	1463	1568	gaatggatgAGTGACAGAAGAGAGTGAGCACacatgattcttgcatggataattgcccatgcttagaagctatgtgtgctttctctctctctgtcacacaccaaca	1	han-MIR156a,	han-MIR156a	gatcagatatagatagaaaTGACAGAAGAGAGTGAGCACacaaagccgaattgtaccgaagtgacttgttgtatgattgatttgggtgctcactgctctatctgtcatcttcattcttaatcatctc	han-miR156a	TGACAGAAGAGAGTGAGCAC	5'	Diff	gp2a	...(((.((.((((((((((((((..((((((((((.((((.((((((........))))))..))))..))))))))))..)))))).)))))))).)))))...	100	44.3	-56.9	1.2	0	8	0	0	11	0	0	8.02601	0	0	10.5811	0	middle
10	9	gma-miR156a_R+1	TGACAGAAGAGAGTGAGCACT	21	NW_015901267.1	-	28505	28608	taaggTGACAGAAGAGAGTGAGCACAtatggcgttttcttgcatgatatatatacacatccatgcttgaagctatacgtgctcacttctctatctgtcaccaaa	9	gma-MIR156q,gma-MIR156s,mes-MIR156d,lus-MIR156g,aof-MIR156a,bra-MIR156e,bna-MIR156e,cas-MIR156a,har-MIR156a,	gma-MIR156s	cttcaggtttgttaatttgtggaggTGACAGAAGAGAGTGAGCACttggctctttcctagcatggatctttcgtgctaaaagctgtgtgctcattctctatctgtcaccacctccttttactccctctcctctt	gma-miR156a	TGACAGAAGAGAGTGAGCAC	5'	Diff	gp2a	...((((((((((((((((((((((.((((((...(((..(((((...............)))))..))))))))).)))))))).))))).)))))))))...	98	40.4	-52.5	1.2	30	23.5	26.5	33	68	33	31.8165	23.5764	25.4085	32.6439	65.4102	32.7926	middle
11	9	gma-miR156a_R+1	TGACAGAAGAGAGTGAGCACT	21	NW_015950030.1	-	41801	41907	aaaggaggTGACAGAAGAGAGTGAGCACAtatggtgttttcttgcatgatatgtttatcccatgcctgaagctatgcttgctcactgctctatctgtcacccccaac	9	gma-MIR156q,gma-MIR156s,mes-MIR156d,lus-MIR156g,aof-MIR156a,bra-MIR156e,bna-MIR156e,cas-MIR156a,har-MIR156a,	gma-MIR156s	cttcaggtttgttaatttgtggaggTGACAGAAGAGAGTGAGCACttggctctttcctagcatggatctttcgtgctaaaagctgtgtgctcattctctatctgtcaccacctccttttactccctctcctctt	gma-miR156a	TGACAGAAGAGAGTGAGCAC	5'	Diff	gp2a	...((.(((((((((((((((((((((..((((((...(((..((((((((....))))..))))..)))))))))..)))))))).)))).))))))))).))...	101	45.8	-49.9	1	30	23.5	26.5	33	68	33	31.8165	23.5764	25.4085	32.6439	65.4102	32.7926	middle
12	10	cme-miR160a_L+2	AATGCCTGGCTCCCTGTATGCCA	23	NW_015789102.1	-	21614	21733	tatgtatatacgtaTATGCCTGGCTCCCTGTATGCCAtttgcagagctcaccgtaatatcgatgggtctttgtgaatggcgtatgaggagccaagcatatcccaatatcgtgtatatggt	2	cme-MIR160c,aof-MIR160c,	cme-MIR160c	tcatcgtaaTGCCTGGCTCCCTGTATGCCAtttgcaaagcccatcatctaaaaataggtggccttctcgaatggcatgcaaggagccatgcatgtataaatt	cme-miR160a	TGCCTGGCTCCCTGTATGCCA	5'	Diff	gp2a	...(((((((((.((((((.(((((((..((((((((((..(((((((((.((......)).)))).)))))..))))))))))..))))))).))))))........)))))))))...	114	44.2	-59.4	1.1	17.5	13	29	20.5	39	22.5	18.5596	13.0423	27.8056	20.2788	37.5147	22.3586	middle
13	11	osa-miR160e-5p_L+2_1ss23GA	AATGCCTGGCTCCCTGTATGCCA	23	NW_015804585.1	-	42314	42404	gcaTATGCCTGGCTCCCTGTATGCCAtttgcagagctcatcggaataccgttgggtccccgtgaatggcgtatgaggagccaagcatatcc	7	osa-MIR160e,bdi-MIR160f,mes-MIR160c,zma-MIR160f,csi-MIR160b,cme-MIR160c,aof-MIR160c,	osa-MIR160e	gtaggggataTGCCTGGCTCCCTGTATGCCGctcgcatggctgccaacccaatgaactcgatctcgttgttggccgctgcgtacgGCGTGCGAGGTGCCAAGCATGgccctctt	osa-miR160e-5p	TGCCTGGCTCCCTGTATGCCG	5'	Diff	gp2a	..((((((.(((((((..((((((((((..(...(((((.(((....))).)))))....)..))))))))))..))))))).))))))..	87	54.9	-49.4	1	17.5	13	29	20.5	39	22.5	18.5596	13.0423	27.8056	20.2788	37.5147	22.3586	middle
14	12	dpr-miR160	TGCCTGGCTCCTTGTATGCCA	21	NW_015881641.1	+	16332	16419	tacaTGCCTGGCTCCTTGTATGCCAtttgcattgttccatctataattgatggccttttcagatggcatgctaggagccatgcatcca	1	dpr-MIR160,	dpr-MIR160	caTGCCTGGCTCCTTGTATGCCAttcagcaagtacatcaatagcaggtggcctttgtggatggcgtgccaggagccaggcata	dpr-miR160	TGCCTGGCTCCTTGTATGCCA	5'	Yes	gp2a	...((((.((((((((.((((((((((((.......(((((.......)))))......)))))))))))).)))))))).))))...	82	45.5	-45.5	1.1	0	3.5	0	0	2.5	2.5	0	3.51138	0	0	2.40479	2.48428	low
15	12	dpr-miR160	TGCCTGGCTCCTTGTATGCCA	21	NW_015928176.1	-	35800	35889	atacaTGCCTGGCTCCTTGTATGCCActtgcattgttccaccaataattgatggccttttcagatggcatgctaggagccatgcatgcat	1	dpr-MIR160,	dpr-MIR160	caTGCCTGGCTCCTTGTATGCCAttcagcaagtacatcaatagcaggtggcctttgtggatggcgtgccaggagccaggcata	dpr-miR160	TGCCTGGCTCCTTGTATGCCA	5'	Yes	gp2a	...(((((.((((((((.((((((((..((.......(((.(((...))).)))......))..)))))))).)))))))).)))))...	84	46.7	-40.6	1	0	3.5	0	0	2.5	2.5	0	3.51138	0	0	2.40479	2.48428	low
16	13	osa-miR160e-5p	TGCCTGGCTCCCTGTATGCCG	21	NW_015922935.1	-	71485	71577	cgtataTGCCTGGCTCCCTGTATGCCAtttgcagagctcaccgtaatatcgatgagcctttgtgaatggcgtatgaggagccaagcatatccc	5	osa-MIR160e,bdi-MIR160f,mes-MIR160c,zma-MIR160f,csi-MIR160b,	osa-MIR160e	gtaggggataTGCCTGGCTCCCTGTATGCCGctcgcatggctgccaacccaatgaactcgatctcgttgttggccgctgcgtacgGCGTGCGAGGTGCCAAGCATGgccctctt	osa-miR160e-5p	TGCCTGGCTCCCTGTATGCCG	5'	Yes	gp2a	...((((((.(((((((..((((((((((..(((((((((.((......)).)))).)))))..))))))))))..))))))).))))))...	87	50.5	-54	1.2	5	0	12	7.5	21.5	2.5	5.30275	0	11.5058	7.41906	20.6812	2.48428	middle
17	14	ptc-miR162a_R+1_2	TCGATAAACCTCTGCATCCAGT	22	NW_015796641.1	+	41181	41328	ttttgggggggtctttttttggttggttaagaacactggaggcagcggttcatcgatctgttccctgaaaggcgataaacaaaatatagcaacaggaatcggTCGATAAACCTCTGCATCCAGCgcttaacccccttctctctcatat	8	ptc-MIR162b,osa-MIR162a,osa-MIR162b,bdi-MIR162,bra-MIR162,cas-MIR162a,htu-MIR162a,hpe-MIR162a,	ptc-MIR162b	tgagaagacactggaggcagcggttcatcgatcttttcctgaagatttttttgttttacacgaacaacacgaaccgaTCGATAAACCTCTGCATCCAGtgcttccct	ptc-miR162a	TCGATAAACCTCTGCATCCAG	3'	Diff	gp2a	...((((((((.........((..(((((((....(((((.((((.((((.(((((((..((((.((....((.(((.......))).))..))))))..))))))).)))).)))).)))))..))))))).))..))))))))...	142	45.9	-54.7	0.8	22.5	23	29.5	30.5	42.5	22.5	23.8624	23.0748	28.285	30.1709	40.8814	22.3586	middle
18	15	ptc-miR162a_R+1_1	TCGATAAACCTCTGCATCCAGA	22	NW_015922604.1	-	80528	80630	attggttgaggacactggaggcagcggttcatcgatctgttccctgaacgcaacagcgctgggaatcggTCGATAAACCTCTGCATCCAGCgcttaaaccccg	9	ptc-MIR162b,osa-MIR162a,osa-MIR162b,bdi-MIR162,bra-MIR162,cas-MIR162a,htu-MIR162a,hpe-MIR162a,tcc-MIR162,	ptc-MIR162b	tgagaagacactggaggcagcggttcatcgatcttttcctgaagatttttttgttttacacgaacaacacgaaccgaTCGATAAACCTCTGCATCCAGtgcttccct	ptc-miR162a	TCGATAAACCTCTGCATCCAG	3'	Diff	gp2a	...((((.(((...(((((.((((.((((.(((((((..(((((....(((....)))..)))))..))))))).)))).)))).)))))..))).))))...	97	55.3	-47.9	0.8	20.5	29	35	38	26.5	32	21.7413	29.0943	33.5584	37.5899	25.4907	31.7988	middle
19	16	tcc-miR162_R+1	TCGATAAACCTCTGCATCCAGA	22	NW_015932800.1	+	35350	35470	tttggttggttaagaacactggaggcagcggttcatcgatctgttccctgaaaggcgataaacaaaatatagcaacaggaatcggTCGATAAACCTCTGCATCCAGCgcttaacccccttc	1	tcc-MIR162,	tcc-MIR162	aggaaaaagggttaaagacactggaggcagcggttcatcgatctcttcctgggaattttgttgtgagaataacacaaatacatgattcgaTCGATAAACCTCTGCATCCAGagccttacctctctctttaa	tcc-miR162	TCGATAAACCTCTGCATCCAG	3'	Diff	gp2a	...((..(((((((....(((((.((((.((((.(((((((..((((.((....((.(((.......))).))..))))))..))))))).)))).)))).)))))..))))))).))...	115	47.1	-46.9	0.8	20.5	29	35	38	26.5	32	21.7413	29.0943	33.5584	37.5899	25.4907	31.7988	middle
20	17	sly-miR164a-5p_1ss21AT	TGGAGAAGCAGGGCACGTGCT	21	NW_015866014.1	-	28686	28857	agctctgattattgaaatggtggaatagtaaaatggttggtagctctcgtTGGAGAAGCAGGGCACGTGCAagttcgaagatatatgcatttgtcatgcatgaattttgCACGTGTTCTCCTTCTCCAACatgagtttcctccctcctttcctctcaagcttcttcagaatt	57	sly-MIR164b,ptc-MIR164a,ptc-MIR164d,ptc-MIR164c,ptc-MIR164b,mtr-MIR164c,mtr-MIR164a,mtr-MIR164b,gma-MIR164a,gma-MIR164e,gma-MIR164i,gma-MIR164g,gma-MIR164j,gma-MIR164d,gma-MIR164b,gma-MIR164f,gma-MIR164k,gma-MIR164h,gma-MIR164c,osa-MIR164d,osa-MIR164c,ath-MIR164a,bdi-MIR164e,bdi-MIR164c,mdm-MIR164b,mdm-MIR164d,mdm-MIR164c,sbi-MIR164b,aly-MIR164a,ppe-MIR164c,ppe-MIR164b,mes-MIR164b,mes-MIR164c,mes…	sly-MIR164b	gtTGGAGAAGCAGGGCACGTGCAaattcttgtattcgacaatatatgcattactaatggtaatgcatgaattttgCACGTGTTCTCCTTCTCCAAC	sly-miR164a-5p	TGGAGAAGCAGGGCACGTGCA	5'	Diff	gp2a	...(((((...((((...((.(((..........((..((.(((((..((((((((((.((..(((((((((((((........((((((.....))))))))).))))))))))..)).))))))))))..))))).))..)))))...))..))))......)))))...	166	42.4	-64.1	0.9	70	81	142	134.5	86.5	104	74.2384	81.2634	136.151	133.049	83.2056	103.346	middle
20	18	sly-miR164b-3p	CACGTGTTCTCCTTCTCCAAC	21	NW_015866014.1	-	28686	28857	agctctgattattgaaatggtggaatagtaaaatggttggtagctctcgtTGGAGAAGCAGGGCACGTGCAagttcgaagatatatgcatttgtcatgcatgaattttgCACGTGTTCTCCTTCTCCAACatgagtttcctccctcctttcctctcaagcttcttcagaatt	57	sly-MIR164b,ptc-MIR164a,ptc-MIR164d,ptc-MIR164c,ptc-MIR164b,mtr-MIR164c,mtr-MIR164a,mtr-MIR164b,gma-MIR164a,gma-MIR164e,gma-MIR164i,gma-MIR164g,gma-MIR164j,gma-MIR164d,gma-MIR164b,gma-MIR164f,gma-MIR164k,gma-MIR164h,gma-MIR164c,osa-MIR164d,osa-MIR164c,ath-MIR164a,bdi-MIR164e,bdi-MIR164c,mdm-MIR164b,mdm-MIR164d,mdm-MIR164c,sbi-MIR164b,aly-MIR164a,ppe-MIR164c,ppe-MIR164b,mes-MIR164b,mes-MIR164c,mes…	sly-MIR164b	gtTGGAGAAGCAGGGCACGTGCAaattcttgtattcgacaatatatgcattactaatggtaatgcatgaattttgCACGTGTTCTCCTTCTCCAAC	sly-miR164b-3p	CACGTGTTCTCCTTCTCCAAC	3'	Yes	gp2a	...(((((...((((...((.(((..........((..((.(((((..((((((((((.((..(((((((((((((........((((((.....))))))))).))))))))))..)).))))))))))..))))).))..)))))...))..))))......)))))...	166	42.4	-64.1	0.9	8.5	7	11.5	13	13.5	8.5	9.01467	7.02276	11.0263	12.8597	12.9858	8.44657	middle
21	19	sly-miR164a-5p_L+1	CTGGAGAAGCAGGGCACGTGCA	22	NW_015926973.1	-	59720	59886	agctctgattattgaaatggtggaatagtaaaatggttggtagctcttgTTGGAGAAGCAGGGCACGTGCAagttcgaagatatatgcatttctcatgcatgaattttgCACGTGTTCTCCTTCTCCAACatgagtttcctccctcctctcaagcttcttcagaatt	59	sly-MIR164b,ptc-MIR164a,ptc-MIR164d,ptc-MIR164c,mtr-MIR164c,mtr-MIR164a,mtr-MIR164b,gma-MIR164a,gma-MIR164i,gma-MIR164e,gma-MIR164g,gma-MIR164d,gma-MIR164b,gma-MIR164k,gma-MIR164h,gma-MIR164c,gma-MIR164j,gma-MIR164f,ath-MIR164a,ath-MIR164c,bdi-MIR164e,mdm-MIR164b,mdm-MIR164d,mdm-MIR164c,aly-MIR164a,aly-MIR164c,ppe-MIR164c,ppe-MIR164b,mes-MIR164b,mes-MIR164c,mes-MIR164a,zma-MIR164d,zma-MIR164a,csi…	sly-MIR164b	gtTGGAGAAGCAGGGCACGTGCAaattcttgtattcgacaatatatgcattactaatggtaatgcatgaattttgCACGTGTTCTCCTTCTCCAAC	sly-miR164a-5p	TGGAGAAGCAGGGCACGTGCA	5'	Diff	gp2a	...(((((...((((....(.(((..........((..((.(((((.(((((((((((.((..(((((((((((((........((((((.....))))))))).))))))))))..)).))))))))))).))))).))..))))).)))))......)))))...	161	41.9	-63.8	0.9	36	29	83	78.5	76.5	100	38.1798	29.0943	79.5814	77.6528	73.5865	99.3714	middle
21	18	sly-miR164b-3p	CACGTGTTCTCCTTCTCCAAC	21	NW_015926973.1	-	59720	59886	agctctgattattgaaatggtggaatagtaaaatggttggtagctcttgTTGGAGAAGCAGGGCACGTGCAagttcgaagatatatgcatttctcatgcatgaattttgCACGTGTTCTCCTTCTCCAACatgagtttcctccctcctctcaagcttcttcagaatt	59	sly-MIR164b,ptc-MIR164a,ptc-MIR164d,ptc-MIR164c,mtr-MIR164c,mtr-MIR164a,mtr-MIR164b,gma-MIR164a,gma-MIR164i,gma-MIR164e,gma-MIR164g,gma-MIR164d,gma-MIR164b,gma-MIR164k,gma-MIR164h,gma-MIR164c,gma-MIR164j,gma-MIR164f,ath-MIR164a,ath-MIR164c,bdi-MIR164e,mdm-MIR164b,mdm-MIR164d,mdm-MIR164c,aly-MIR164a,aly-MIR164c,ppe-MIR164c,ppe-MIR164b,mes-MIR164b,mes-MIR164c,mes-MIR164a,zma-MIR164d,zma-MIR164a,csi…	sly-MIR164b	gtTGGAGAAGCAGGGCACGTGCAaattcttgtattcgacaatatatgcattactaatggtaatgcatgaattttgCACGTGTTCTCCTTCTCCAAC	sly-miR164b-3p	CACGTGTTCTCCTTCTCCAAC	3'	Yes	gp2a	...(((((...((((....(.(((..........((..((.(((((.(((((((((((.((..(((((((((((((........((((((.....))))))))).))))))))))..)).))))))))))).))))).))..))))).)))))......)))))...	161	41.9	-63.8	0.9	8.5	7	11.5	13	13.5	8.5	9.01467	7.02276	11.0263	12.8597	12.9858	8.44657	middle
22	20	mdm-MIR166e-p5	ATGTTGTCTGGTTCGAGATCT	21	NW_015929103.1	+	1245	1416	aaaaatgtgcatgaattgtatgttgagggaaATGTCGTCTGGTTCGAGATCTttcattacaaggcaaaaccctaaactaaagatatttatatgagtgtagtcatcacgtacgtgaatgATTTCGGACCAGGCTTCATTCCCCTcagctccaatatatttacatgcttagtta	13	stu-MIR166d,sly-MIR166a,gma-MIR166g,gma-MIR166i,gma-MIR166p,mdm-MIR166e,mdm-MIR166i,mdm-MIR166c,ppe-MIR166b,vvi-MIR166g,cme-MIR166d,fve-MIR166d,cpa-MIR166b,	mdm-MIR166e	agttgagggaaatgttgtctggttcgagatctttcagtgaagcttggatattgtcatcatctgaatgattTCGGACCAGGCTTCATTCCCCtcaact	mdm-MIR166e-p5	atgttgtctggttcgagatct	5'	New	gp2a	...(((..(((((((.(((((((((((((.((((..(((((((((((((((.((((((((.(((......)))........(((..(((((....)))))..)))..))).))))).)))))))))))))))..)))).))))))))....))))).)).)))))...))).	168	37.2	-61.7	1	14	5	15	0	12	7	14.8477	5.01626	14.3822	0	11.543	6.956	middle
22	21	stu-miR166a-3p_L+3R+1	ATTTCGGACCAGGCTTCATTCCCCT	25	NW_015929103.1	+	1245	1416	aaaaatgtgcatgaattgtatgttgagggaaATGTCGTCTGGTTCGAGATCTttcattacaaggcaaaaccctaaactaaagatatttatatgagtgtagtcatcacgtacgtgaatgATTTCGGACCAGGCTTCATTCCCCTcagctccaatatatttacatgcttagtta	13	stu-MIR166d,sly-MIR166a,gma-MIR166g,gma-MIR166i,gma-MIR166p,mdm-MIR166e,mdm-MIR166i,mdm-MIR166c,ppe-MIR166b,vvi-MIR166g,cme-MIR166d,fve-MIR166d,cpa-MIR166b,	stu-MIR166d	AGAATGTCGTCTGGTTCGAGAtctttcataagaaggtaacatgcaatgagatgattTCGGACCAGGCTTCATTCCCC	stu-miR166a-3p	TCGGACCAGGCTTCATTCCCC	3'	Diff	gp2a	...(((..(((((((.(((((((((((((.((((..(((((((((((((((.((((((((.(((......)))........(((..(((((....)))))..)))..))).))))).)))))))))))))))..)))).))))))))....))))).)).)))))...))).	168	37.2	-61.7	1	6	0	5	6	0	0	6.36329	0	4.79406	5.93525	0	0	low
23	22	stu-miR166b_R+1_1ss20TC	TCGGACCAGGCTTCATTCCCCA	22	NW_015850648.1	-	5355	5486	aaggaagaaaacatttgttgaggggagtgctgtctggttcgaaaccattcaccaaattagagtatcaagagttgatgatttgaatgattTCGGACCAGGCTTCATTCCCCCcaactctagatttttttcagc	7	stu-MIR166b,gma-MIR166u,osa-MIR166j,osa-MIR166e,bdi-MIR166a,ata-MIR166b,hvu-MIR166a,	stu-MIR166b	ggaatgttgtttggttcgaaatcattcaacaaattaaagtccatctcgatgatcaatgaattgaatgattTCGGACCAGGCTTCATTCCTC	stu-miR166b	TCGGACCAGGCTTCATTCCTC	3'	Diff	gp2a	...((((((((.....((((.((((((((..(((((((((((((.((((((....(((((...........)))))....)))))).)))))))))))))..)))))))).))))......))))))))...	126	40.9	-53.2	1	220.5	177	223	196	235.5	173	233.851	177.576	213.815	193.885	226.531	171.912	middle
24	23	ptc-miR166a_1ss2CT	TTGGACCAGGCTTCATTCCCC	21	NW_015885779.1	-	53657	53799	aagaaaagaaacaagatttgttaaggagaatgttgtctggttcgtgaccaatctgtaaacagtaattagctaactgtcaacattcatcacttgaatgatcTCGGACCAGGCTTCATTCCCCtcaactcaatgtttcttttaga	27	ptc-MIR166i,ptc-MIR166l,ptc-MIR166m,gma-MIR166p,mdm-MIR166j,mdm-MIR166d,sbi-MIR166j,ppe-MIR166c,mes-MIR166h,mes-MIR166c,mes-MIR166i,vvi-MIR166d,csi-MIR166d,csi-MIR166f,lus-MIR166e,lus-MIR166f,lus-MIR166c,lus-MIR166a,lus-MIR166d,lus-MIR166k,cme-MIR166g,cme-MIR166i,fve-MIR166f,aof-MIR166b,rco-MIR166a,eun-MIR166,crt-MIR166b,	ptc-MIR166m	tgaggatgtgggggaatgtcgtctgactcgagacaacaggtaaactgaaggaatggccggagtttaagagttctcTCGGACCAGGCTTCATTCCCCtcatccaca	ptc-miR166a	TCGGACCAGGCTTCATTCCCC	3'	Diff	gp2a	...((((((((((......(((.(((.(((((..((((((((((.((...........(((((.........)))))...((((((.....)))))).)).))))))))))..))))).))).)))....))))))))))...	137	37.1	-47.9	0.9	181	260	212	262	240	239.5	191.959	260.845	203.268	259.173	230.86	237.994	middle
25	24	gma-miR166a-3p_1ss17TC	TCGGACCAGGCTTCATCCCCC	21	NW_015899063.1	-	39784	39914	tttgaggggaatgttgtctggctcgaagccattatctcctcttgatttaacctacttcttcttaacttcaaaaatagcagaacaaacaatcatgagatagtgtcgTCGGACCAGGCTTCATTCCCCccaat	10	gma-MIR166u,ath-MIR165a,ath-MIR165b,aly-MIR165b,aly-MIR165a,lus-MIR166k,lus-MIR166b,aof-MIR166c,bna-MIR166f,cas-MIR165a,	gma-MIR166u	gaggttgagaGGAATGTTGTCTGGCTCGAGGtcatggaggaggaggagagtactgagatgagtgaaagtttccaatggaaatttaccctcttaacacaaaaaaaaattgattcTCGGACCAGGCTTCATTCCCCacaccca	gma-miR166a-3p	TCGGACCAGGCTTCATTCCCC	3'	Diff	gp2a	.(((.((((((((..((((((..(((...(((((((((....(((((........((((.((.............)).)))).....))))).)))))))))...)))..))))))..)))))))).))).	129	42	-45.6	0.8	248	289	293	318	296	270	263.016	289.94	280.932	314.568	284.727	268.303	middle
26	25	mes-miR166i	TTGGACCAGGCTTCATTCCCC	21	NW_015950949.1	-	51184	51326	tgaggggaatgttgtctggctcgaagccactatctcctcttgatttaacctagttcaagaagtagtatgagtatttttgtcaaagttgtatgaacaaacaataatgagagatagtgtcgTCGGACCAGGCTTCATTCCCCcca	1	mes-MIR166i,	mes-MIR166i	atggttgtttttgaagggaatgttggctggctctaggcattcacaagtgtgggagaagaaatcgatcagaagcagtggaagctTTGGACCAGGCTTCATTCCCCtcaatataattaccat	mes-miR166i	TTGGACCAGGCTTCATTCCCC	3'	Yes	gp2a	.(.((((((((..((((((..(((...(((((((((.((((((...........))))))...................(((..(((((........)))))..))))))))))))...)))..))))))..)))))))).).	141	42	-52.9	0.9	181	260	212	262	240	239.5	191.959	260.845	203.268	259.173	230.86	237.994	middle
27	26	stu-miR166b_L+1_1ss21TC	ATCGGACCAGGCTTCATTCCCC	22	NW_015955195.1	-	42900	43014	aacatctgttgaggggaatgctgtctggttcgaaaccattcaccaaagtatgatcaagagtttgattatttgaatgatTTCGGACCAGGCTTCATTCCCCccaactctagattat	22	stu-MIR166b,ptc-MIR166d,ptc-MIR166f,mtr-MIR166e,gma-MIR166e,gma-MIR166r,osa-MIR166j,osa-MIR166m,osa-MIR166e,ath-MIR166a,sbi-MIR166b,zma-MIR166h,zma-MIR166f,vvi-MIR166f,csi-MIR166f,lus-MIR166k,lus-MIR166h,lus-MIR166j,cme-MIR166h,cas-MIR166e,cpa-MIR166e,crt-MIR166b,	stu-MIR166b	ggaatgttgtttggttcgaaatcattcaacaaattaaagtccatctcgatgatcaatgaattgaatgattTCGGACCAGGCTTCATTCCTC	stu-miR166b	TCGGACCAGGCTTCATTCCTC	3'	Diff	gp2a	...((((((((.((((((((..(((((((((((((.((((((.......((((((((....)))))))).)))))).)))))))))))))..)))))))).))))...))))...	109	40.9	-51	1.1	1578.5	1298	2025	2287	1669.5	1779	1674.08	1302.22	1941.6	2262.32	1605.92	1767.82	high
28	27	stu-miR167a-5p_L+2	AATGAAGCTGCCAGCATGATCTA	23	NW_015919678.1	+	73114	73258	tctgaaagggaacaAGTGAAGCTGCCAGCATGATCTAaacttgaccagtttattataaatatatatatatggaaagaaagaaagaaatggatggatggccaagtttaGGTCATGTTTTGACAGCCTCACTccttcctcttttgag	52	stu-MIR167c,ptc-MIR167b,ptc-MIR167d,mtr-MIR167a,gma-MIR167b,gma-MIR167a,gma-MIR167d,gma-MIR167l,osa-MIR167c,osa-MIR167a,osa-MIR167e,ath-MIR167b,ath-MIR167a,bdi-MIR167f,bdi-MIR167b,mdm-MIR167e,mdm-MIR167b,lja-MIR167c,lja-MIR167a,sbi-MIR167i,aly-MIR167b,aly-MIR167a,ppe-MIR167a,mes-MIR167c,zma-MIR167d,zma-MIR167c,zma-MIR167a,vvi-MIR167d,csi-MIR167e,lus-MIR167c,lus-MIR167h,tae-MIR167a,cme-MIR167a,fve…	stu-MIR167c	TGAAGCTGCCAGCATGATCTAaacttggccacacttataaagaaaaaaaatgggtgactaaggttaGGTCATGCTCGGACAGCCTCACT	stu-miR167a-5p	TGAAGCTGCCAGCATGATCTA	5'	Diff	gp2a	((.(((((((((..(((((.((((.((((((((((((((((((.(((.(..(((....((((....))))...................)))..)))).))))))))))))))))..)).)))).)))))..)))).))))))).	144	37.2	-47.5	0.9	57	47	57	89	34	70.5	60.4513	47.1528	54.6523	88.0395	32.7051	70.0568	middle
28	28	stu-miR167c-3p_2ss10CT11GT	GGTCATGCTTTGACAGCCTCACT	23	NW_015919678.1	+	73114	73258	tctgaaagggaacaAGTGAAGCTGCCAGCATGATCTAaacttgaccagtttattataaatatatatatatggaaagaaagaaagaaatggatggatggccaagtttaGGTCATGTTTTGACAGCCTCACTccttcctcttttgag	52	stu-MIR167c,ptc-MIR167b,ptc-MIR167d,mtr-MIR167a,gma-MIR167b,gma-MIR167a,gma-MIR167d,gma-MIR167l,osa-MIR167c,osa-MIR167a,osa-MIR167e,ath-MIR167b,ath-MIR167a,bdi-MIR167f,bdi-MIR167b,mdm-MIR167e,mdm-MIR167b,lja-MIR167c,lja-MIR167a,sbi-MIR167i,aly-MIR167b,aly-MIR167a,ppe-MIR167a,mes-MIR167c,zma-MIR167d,zma-MIR167c,zma-MIR167a,vvi-MIR167d,csi-MIR167e,lus-MIR167c,lus-MIR167h,tae-MIR167a,cme-MIR167a,fve…	stu-MIR167c	TGAAGCTGCCAGCATGATCTAaacttggccacacttataaagaaaaaaaatgggtgactaaggttaGGTCATGCTCGGACAGCCTCACT	stu-miR167c-3p	GGTCATGCTCGGACAGCCTCACT	3'	Diff	gp2a	((.(((((((((..(((((.((((.((((((((((((((((((.(((.(..(((....((((....))))...................)))..)))).))))))))))))))))..)).)))).)))))..)))).))))))).	144	37.2	-47.5	0.9	0	4.5	0	0	2.5	0	0	4.51463	0	0	2.40479	0	low
29	29	stu-miR167a-5p_L+2R+1	AATGAAGCTGCCAGCATGATCTAA	24	NW_015948551.1	+	21771	21935	tacttcagatccaagtctgaaagggaacaAGTGAAGCTGCCAGCATGATCTAAacttggccagttaataattatacataaataagagaaatggatggccaaggttaGGTCATGCTTTGACAGCCTCACTccttcctcttttgacgactcaacggattctgaaaag	26	stu-MIR167c,ptc-MIR167b,ptc-MIR167d,gma-MIR167a,ath-MIR167a,ath-MIR167b,mdm-MIR167e,aly-MIR167a,aly-MIR167b,ppe-MIR167a,mes-MIR167c,csi-MIR167e,cme-MIR167a,fve-MIR167c,bra-MIR167d,bna-MIR167b,bra-MIR167b,bra-MIR167c,bna-MIR167a,cas-MIR167a,cas-MIR167b,cpa-MIR167a,cpa-MIR167b,rco-MIR167a,dpr-MIR167b,tcc-MIR167b,	stu-MIR167c	TGAAGCTGCCAGCATGATCTAaacttggccacacttataaagaaaaaaaatgggtgactaaggttaGGTCATGCTCGGACAGCCTCACT	stu-miR167a-5p	TGAAGCTGCCAGCATGATCTA	5'	Diff	gp2a	...(((((((((.((((.(((((((((..(((((.((((.(((((((((((((.((((((((........((((......))))..........)))))))).))))))))))))..).)))).)))))..)))).)))))...))))....)))).)))))...	159	41.2	-65.2	1	9	10	16	21	0	18.5	9.54494	10.0325	15.341	20.7734	0	18.3837	middle
29	28	stu-miR167c-3p_2ss10CT11GT	GGTCATGCTTTGACAGCCTCACT	23	NW_015948551.1	+	21771	21935	tacttcagatccaagtctgaaagggaacaAGTGAAGCTGCCAGCATGATCTAAacttggccagttaataattatacataaataagagaaatggatggccaaggttaGGTCATGCTTTGACAGCCTCACTccttcctcttttgacgactcaacggattctgaaaag	26	stu-MIR167c,ptc-MIR167b,ptc-MIR167d,gma-MIR167a,ath-MIR167a,ath-MIR167b,mdm-MIR167e,aly-MIR167a,aly-MIR167b,ppe-MIR167a,mes-MIR167c,csi-MIR167e,cme-MIR167a,fve-MIR167c,bra-MIR167d,bna-MIR167b,bra-MIR167b,bra-MIR167c,bna-MIR167a,cas-MIR167a,cas-MIR167b,cpa-MIR167a,cpa-MIR167b,rco-MIR167a,dpr-MIR167b,tcc-MIR167b,	stu-MIR167c	TGAAGCTGCCAGCATGATCTAaacttggccacacttataaagaaaaaaaatgggtgactaaggttaGGTCATGCTCGGACAGCCTCACT	stu-miR167c-3p	GGTCATGCTCGGACAGCCTCACT	3'	Diff	gp2a	...(((((((((.((((.(((((((((..(((((.((((.(((((((((((((.((((((((........((((......))))..........)))))))).))))))))))))..).)))).)))))..)))).)))))...))))....)))).)))))...	159	41.2	-65.2	1	0	4.5	0	0	2.5	0	0	4.51463	0	0	2.40479	0	low
30	30	stu-miR167a-5p_R+1	TGAAGCTGCCAGCATGATCTAT	22	NW_015922103.1	-	23615	23732	gtatcgtgaaccattagcagtTGAAGCTGCCAGCATGATCTAAacttcccttttgtttcatctatcaaggaaagATCAGATCATGTGGCAGCCTCACCtgttgatggtgtcacgaaac	49	stu-MIR167a,ptc-MIR167c,ptc-MIR167f,ptc-MIR167g,ptc-MIR167b,ptc-MIR167d,gma-MIR167a,gma-MIR167e,gma-MIR167f,ath-MIR167a,ath-MIR167b,bdi-MIR167a,mdm-MIR167g,mdm-MIR167f,mdm-MIR167a,mdm-MIR167h,mdm-MIR167i,mdm-MIR167j,lja-MIR167b,gra-MIR167c,aly-MIR167a,aly-MIR167b,ppe-MIR167d,mes-MIR167h,vvi-MIR167b,vvi-MIR167e,csi-MIR167e,lus-MIR167c,cme-MIR167a,cme-MIR167c,cme-MIR167e,fve-MIR167a,bra-MIR167b,bra…	stu-MIR167a	TGAAGCTGCCAGCATGATCTAaacttccctttttagttcaaatatgatatgaggaaagatcaGATCATGTGGCAGCCTCACC	stu-miR167a-5p	TGAAGCTGCCAGCATGATCTA	5'	Diff	gp2a	((.(((((((((((((((((.(((.(((((((.((((((((...(((.((((..............)))).)))...))))))))))))))).))).))))))))))).)))))).))	118	44.1	-56.5	1.1	410.5	285	409.5	500	265	388	435.355	285.927	392.634	494.604	254.907	385.561	middle
30	31	stu-miR167a-3p_L+4_1ss18CT	ATCAGATCATGTGGCAGTCTCACC	24	NW_015922103.1	-	23615	23732	gtatcgtgaaccattagcagtTGAAGCTGCCAGCATGATCTAAacttcccttttgtttcatctatcaaggaaagATCAGATCATGTGGCAGCCTCACCtgttgatggtgtcacgaaac	49	stu-MIR167a,ptc-MIR167c,ptc-MIR167f,ptc-MIR167g,ptc-MIR167b,ptc-MIR167d,gma-MIR167a,gma-MIR167e,gma-MIR167f,ath-MIR167a,ath-MIR167b,bdi-MIR167a,mdm-MIR167g,mdm-MIR167f,mdm-MIR167a,mdm-MIR167h,mdm-MIR167i,mdm-MIR167j,lja-MIR167b,gra-MIR167c,aly-MIR167a,aly-MIR167b,ppe-MIR167d,mes-MIR167h,vvi-MIR167b,vvi-MIR167e,csi-MIR167e,lus-MIR167c,cme-MIR167a,cme-MIR167c,cme-MIR167e,fve-MIR167a,bra-MIR167b,bra…	stu-MIR167a	TGAAGCTGCCAGCATGATCTAaacttccctttttagttcaaatatgatatgaggaaagatcaGATCATGTGGCAGCCTCACC	stu-miR167a-3p	GATCATGTGGCAGCCTCACC	3'	Diff	gp2a	((.(((((((((((((((((.(((.(((((((.((((((((...(((.((((..............)))).)))...))))))))))))))).))).))))))))))).)))))).))	118	44.1	-56.5	1.1	0	0	0	5	0	0	0	0	0	4.94604	0	0	low
31	32	ptc-miR167e_1ss21GT	TGAAGCTGCCAGCATGATCTT	21	NW_015904234.1	-	8247	8406	gtatgttggtttgagaggtTGAAGCTGCCAGCATGATCTGgtaattcagacgaccataatctatttccttctctcagatggttggacgctatatttgaaaggatttgggctttgtttagtttcatcaggtcatctagcagcttcaatcactcaccaacaa	47	ptc-MIR167e,ptc-MIR167f,ptc-MIR167g,mtr-MIR167b,gma-MIR167g,gma-MIR167j,gma-MIR167e,gma-MIR167f,osa-MIR167i,ath-MIR167d,bdi-MIR167d,mdm-MIR167a,mdm-MIR167h,mdm-MIR167i,mdm-MIR167j,lja-MIR167,lja-MIR167b,gra-MIR167c,aly-MIR167d,ppe-MIR167c,ppe-MIR167d,mes-MIR167d,mes-MIR167e,mes-MIR167g,mes-MIR167h,zma-MIR167i,vvi-MIR167c,csi-MIR167a,csi-MIR167b,lus-MIR167g,lus-MIR167f,lus-MIR167b,lus-MIR167a,cme-…	ptc-MIR167e	cactagtagtTGAAGCTGCCAGCATGATCTGaactttccttaattttcctatacgggaaagactagatcatgtggtagtttcatctattga	ptc-miR167e	TGAAGCTGCCAGCATGATCTG	5'	Diff	gp2a	...(((((((..(((.((((((((((((.((.((((((((((((((.((((((......((((..(((((.((....(((((.....)))))....)))))))..))))..))))))))))..)))))))))))).)))))))))))).)))))))))).	156	41.2	-61.3	0.9	374	330	410	368	277	353	396.645	331.073	393.113	364.029	266.45	350.781	middle
32	33	ptc-miR167a_R+1	TGAAGCTGCCAGCATGATCTAC	22	NW_015938675.1	-	7015	7135	taccgtacaccactatcagtTGAAGCTGCCAGCATGATCTAAacttacctcttgtaattaattaagtttgagggaagattagatcatgtggtggcttcacccgttagttggtactacgaaa	66	ptc-MIR167c,ptc-MIR167g,ptc-MIR167f,mtr-MIR167a,gma-MIR167d,gma-MIR167e,gma-MIR167l,gma-MIR167f,gma-MIR167b,gma-MIR167a,osa-MIR167a,osa-MIR167c,ath-MIR167a,bdi-MIR167f,bdi-MIR167b,mdm-MIR167g,mdm-MIR167f,mdm-MIR167j,mdm-MIR167e,mdm-MIR167a,mdm-MIR167h,mdm-MIR167i,mdm-MIR167b,lja-MIR167c,lja-MIR167a,lja-MIR167b,gra-MIR167c,sbi-MIR167a,sbi-MIR167i,aly-MIR167a,ppe-MIR167d,ppe-MIR167a,mes-MIR167c,mes…	ptc-MIR167c	cactagcagtTGAAGCTGCCAGCATGATCTAaattaacctccttctttatcaaggatggattagatcatgtggtagtttcacctgctga	ptc-miR167a	TGAAGCTGCCAGCATGATCTA	5'	Diff	gp2a	...((((.(((((((.....((((((..(((.((((((((((.(((.((((..................)))).))).)))))))))))))..)))))).....)))).)))..))))...	115	40.5	-48	1	130.5	93	135.5	164	85	146	138.402	93.3024	129.919	162.23	81.7627	145.082	middle
33	34	bra-miR168b-5p_R+1	TCGCTTGGTGCAGGTCGGGACA	22	NW_015800592.1	-	9147	9308	ttatcgcggcggtctctcatTCGCTTGGTGCAGGTCGGGACCtgcctcgccggcgacaatgacgtcagctgacggtgacggtggcgtatcgatagatatacatgttgtttatgacgaaattttgGTCCCGCCTTGCATCAACTGAATcggagactgcggtga	2	bra-MIR168c,cas-MIR168,	bra-MIR168c	gaatcaccgtcgggctcggatTCGCTTGGTGCAGGTCGGGACacaaatcactggtgcttttgccttattggtttgtgagcagggattggctCCCGCCTTGCATCAACTGAATcggagcctccaatggtgaaac	bra-miR168b-5p	TCGCTTGGTGCAGGTCGGGAC	5'	Diff	gp2a	...((((.((((((((..((((..((((((((((.(((((((.(((.....)))........((((.(((..((....))..)))......(((((((.......))))))))))).......))))))).))))))))))..))))..)))))))).))))	159	54.3	-75.6	0.9	12	11	12	8	13	14	12.7266	11.0358	11.5058	7.91367	12.5049	13.912	middle
33	35	bra-miR168b-3p_L+2	CTCCCGCCTTGCATCAACTGAAT	23	NW_015800592.1	-	9147	9308	ttatcgcggcggtctctcatTCGCTTGGTGCAGGTCGGGACCtgcctcgccggcgacaatgacgtcagctgacggtgacggtggcgtatcgatagatatacatgttgtttatgacgaaattttgGTCCCGCCTTGCATCAACTGAATcggagactgcggtga	2	bra-MIR168c,cas-MIR168,	bra-MIR168c	gaatcaccgtcgggctcggatTCGCTTGGTGCAGGTCGGGACacaaatcactggtgcttttgccttattggtttgtgagcagggattggctCCCGCCTTGCATCAACTGAATcggagcctccaatggtgaaac	bra-miR168b-3p	CCCGCCTTGCATCAACTGAAT	3'	Diff	gp2a	...((((.((((((((..((((..((((((((((.(((((((.(((.....)))........((((.(((..((....))..)))......(((((((.......))))))))))).......))))))).))))))))))..))))..)))))))).))))	159	54.3	-75.6	0.9	0	6	9	0	7	9	0	6.01951	8.62931	0	6.7334	8.94342	low
34	36	ptc-MIR168b-p3	TGGATCCCGCCTTGCATCAAC	21	NW_015890946.1	-	11406	11561	gtctctaattcgcttggtgcaggtcgggactaattcgccggcggcaatcacgtcggcggtgattattctacgaagcttagatgtacgaagttatcaacaatgttcctttgcggcgaaattTGGGTCCCGCCTTGCATCAACtgaattggagactgc	20	ptc-MIR168b,ptc-MIR168a,mtr-MIR168c,gma-MIR168b,gma-MIR168a,ath-MIR168a,lja-MIR168,aly-MIR168a,mes-MIR168a,vvi-MIR168,csi-MIR168,lus-MIR168b,cme-MIR168,aof-MIR168b,bra-MIR168b,rco-MIR168,vun-MIR168,crt-MIR168,tcc-MIR168,ccl-MIR168,	ptc-MIR168b	ggtctctaatTCGCTTGGTGCAGGTCGGGAActgattcggcgatttgattgccagatggctaaacacgattggctgtgaggcaaattataaaaagaaagagaattggatCCCGCCTTGCATCAACTGAATcggaga	ptc-MIR168b-p3	tggatCCCGCCTTGCATCAAC	3'	New	gp2a	(((((((((((..((((((((((.(((((((...((((((.((((......)))).))))))........((..((..((....(((..(((...)))..)))..))..))..)).......))))))).))))))))))..)))))))))))...	153	50	-66.3	0.8	8.5	5	0	8	6	12	9.01467	5.01626	0	7.91367	5.77149	11.9246	middle
35	36	ptc-MIR168b-p3	TGGATCCCGCCTTGCATCAAC	21	NW_015925321.1	+	17011	17192	tgagtttgcatttattgcggcggtctctcattcgcttggtgcaggtcgggacctgcctcgccggcgacaatgatgtcagctgacggtgacggcggcgtaccgataaatatacatgctgttTGGGTCCCGCCTTGCATCAACtgaatcggagactgcggtgaatttaatttgtttcaactaaa	16	ptc-MIR168b,ptc-MIR168a,mtr-MIR168c,gma-MIR168b,gma-MIR168a,ath-MIR168a,aly-MIR168a,mes-MIR168a,csi-MIR168,cme-MIR168,bra-MIR168b,rco-MIR168,vun-MIR168,crt-MIR168,tcc-MIR168,ccl-MIR168,	ptc-MIR168b	ggtctctaatTCGCTTGGTGCAGGTCGGGAActgattcggcgatttgattgccagatggctaaacacgattggctgtgaggcaaattataaaaagaaagagaattggatCCCGCCTTGCATCAACTGAATcggaga	ptc-MIR168b-p3	tggatCCCGCCTTGCATCAAC	3'	New	gp2a	..((((.(((.((((..(.((((((((..((((..((((((((((.(((((((((((((((((((((((....)))).))...)))))).))).((((..............)))).....)))))))).))))))))))..))))..)))))))).)..)...)))..)))...))))...	177	51.1	-75.1	0.8	8.5	5	0	8	6	12	9.01467	5.01626	0	7.91367	5.77149	11.9246	middle
36	37	ptc-miR169a_R+3	CAGCCAAGGATGACTTGCCGACTC	24	NW_015923156.1	+	26025	26197	aatggccttgcatgttggtacaggaagtaagagttgCAGCCAAGGATGACTTGCCGACTCttgcacattaacagtaataaatatatatagtatggttattcttattggaagagaaaaagtTGGCAAGTGGTCCTTGGCTACatctttgtttctgcccctctagccaggtcttt	25	ptc-MIR169b,ptc-MIR169c,ptc-MIR169a,mtr-MIR169a,osa-MIR169b,ath-MIR169a,aly-MIR169a,mes-MIR169g,mes-MIR169f,zma-MIR169r,vvi-MIR169g,vvi-MIR169d,vvi-MIR169a,vvi-MIR169c,csi-MIR169m,lus-MIR169l,cme-MIR169f,cas-MIR169a,ata-MIR169e,ata-MIR169f,ata-MIR169d,cpa-MIR169,vun-MIR169,tcc-MIR169c,tcc-MIR169e,	ptc-MIR169a	aagtggtatgCAGCCAAGGATGACTTGCCGActtaactgatctgtataaattaatgcatgtgtagtcaaaattactactactatatattaatctgatctgtgaccacaaattaactaactactagctagtaattagttggcaagttgtccatggctacatgctgc	ptc-miR169a	CAGCCAAGGATGACTTGCCGA	5'	Diff	gp2a	...(((((.((.((..((..((((((..((((..((.(((((((((..((((((((((((((...((.(((.((((((..((((.....)))).)))))).))).))...))))....))))))))))..))))))))).))))))..))))))..))..)))).)))))...	167	41	-64.4	0.9	0	8.5	10.5	3	5.5	5	0	8.52764	10.0675	2.96762	5.29053	4.96857	middle
36	38	ath-miR169a-3p_L+1_1ss9TG	TGGCAAGTGGTCCTTGGCTAC	21	NW_015923156.1	+	26025	26197	aatggccttgcatgttggtacaggaagtaagagttgCAGCCAAGGATGACTTGCCGACTCttgcacattaacagtaataaatatatatagtatggttattcttattggaagagaaaaagtTGGCAAGTGGTCCTTGGCTACatctttgtttctgcccctctagccaggtcttt	25	ptc-MIR169b,ptc-MIR169c,ptc-MIR169a,mtr-MIR169a,osa-MIR169b,ath-MIR169a,aly-MIR169a,mes-MIR169g,mes-MIR169f,zma-MIR169r,vvi-MIR169g,vvi-MIR169d,vvi-MIR169a,vvi-MIR169c,csi-MIR169m,lus-MIR169l,cme-MIR169f,cas-MIR169a,ata-MIR169e,ata-MIR169f,ata-MIR169d,cpa-MIR169,vun-MIR169,tcc-MIR169c,tcc-MIR169e,	ath-MIR169a	gtgacgaaagtagtgtgCAGCCAAGGATGACTTGCCGAtttaaatgatctttctttatactctattaagacaatttagtttcaaacttttttttttttttttttttgaaggattcaggaagaaattaggatatattattccgtataaaatacaagatatataaaaccaaaaagaaaaagtaacatgatcGGCAAGTTGTCCTTGGCTACacgttactttgtgtcgc	ath-miR169a-3p	GGCAAGTTGTCCTTGGCTAC	3'	Diff	gp2a	...(((((.((.((..((..((((((..((((..((.(((((((((..((((((((((((((...((.(((.((((((..((((.....)))).)))))).))).))...))))....))))))))))..))))))))).))))))..))))))..))..)))).)))))...	167	41	-64.4	0.9	5	9.5	21.5	25.5	10	15.5	5.30275	9.53089	20.6145	25.2248	9.61915	15.4026	middle
37	37	ptc-miR169a_R+3	CAGCCAAGGATGACTTGCCGACTC	24	NW_015936359.1	-	3871	4041	aatgaccttgcatgttggtacaggaagtaagagttgCAGCCAAGGATGACTTGCCGACTCttacacatttacagtaatatgtatatagtatggttattcttattggaagagaaaaagtTGGCAAGTGGTCCTTGGCTACatctttctttctgcccctctagccaggtcttt	25	ptc-MIR169b,ptc-MIR169c,ptc-MIR169a,mtr-MIR169a,osa-MIR169b,ath-MIR169a,aly-MIR169a,mes-MIR169g,mes-MIR169f,zma-MIR169r,vvi-MIR169g,vvi-MIR169d,vvi-MIR169a,vvi-MIR169c,csi-MIR169m,lus-MIR169l,cme-MIR169f,cas-MIR169a,ata-MIR169e,ata-MIR169f,ata-MIR169d,cpa-MIR169,vun-MIR169,tcc-MIR169c,tcc-MIR169e,	ptc-MIR169a	aagtggtatgCAGCCAAGGATGACTTGCCGActtaactgatctgtataaattaatgcatgtgtagtcaaaattactactactatatattaatctgatctgtgaccacaaattaactaactactagctagtaattagttggcaagttgtccatggctacatgctgc	ptc-miR169a	CAGCCAAGGATGACTTGCCGA	5'	Diff	gp2a	...(((((.((.((..((..(((((((.((((..((.(((((((((..(((((((((((..(((.....((((......))))....)))......(((((.......)))))..)))))))))))..))))))))).)))))).)))))))..))..)))).)))))...	165	40.9	-66	0.9	0	8.5	10.5	3	5.5	5	0	8.52764	10.0675	2.96762	5.29053	4.96857	middle
37	38	ath-miR169a-3p_L+1_1ss9TG	TGGCAAGTGGTCCTTGGCTAC	21	NW_015936359.1	-	3871	4041	aatgaccttgcatgttggtacaggaagtaagagttgCAGCCAAGGATGACTTGCCGACTCttacacatttacagtaatatgtatatagtatggttattcttattggaagagaaaaagtTGGCAAGTGGTCCTTGGCTACatctttctttctgcccctctagccaggtcttt	25	ptc-MIR169b,ptc-MIR169c,ptc-MIR169a,mtr-MIR169a,osa-MIR169b,ath-MIR169a,aly-MIR169a,mes-MIR169g,mes-MIR169f,zma-MIR169r,vvi-MIR169g,vvi-MIR169d,vvi-MIR169a,vvi-MIR169c,csi-MIR169m,lus-MIR169l,cme-MIR169f,cas-MIR169a,ata-MIR169e,ata-MIR169f,ata-MIR169d,cpa-MIR169,vun-MIR169,tcc-MIR169c,tcc-MIR169e,	ath-MIR169a	gtgacgaaagtagtgtgCAGCCAAGGATGACTTGCCGAtttaaatgatctttctttatactctattaagacaatttagtttcaaacttttttttttttttttttttgaaggattcaggaagaaattaggatatattattccgtataaaatacaagatatataaaaccaaaaagaaaaagtaacatgatcGGCAAGTTGTCCTTGGCTACacgttactttgtgtcgc	ath-miR169a-3p	GGCAAGTTGTCCTTGGCTAC	3'	Diff	gp2a	...(((((.((.((..((..(((((((.((((..((.(((((((((..(((((((((((..(((.....((((......))))....)))......(((((.......)))))..)))))))))))..))))))))).)))))).)))))))..))..)))).)))))...	165	40.9	-66	0.9	5	9.5	21.5	25.5	10	15.5	5.30275	9.53089	20.6145	25.2248	9.61915	15.4026	middle
38	39	mdm-MIR169g-p3_1ss21GT	CAAGTTGTCCCTGGCTACATTT	22	NW_015869299.1	+	62122	62261	ttacatgaagaaatagagagtggattgcagccagggatgacttgccgagaatctctttgttttaattgcctgtggtttacctggggatttgtatcggCAAGTTGTCCCTGGCTACATTTcgctctcttcttctcatgcaa	5	ath-MIR169b,mdm-MIR169g,aly-MIR169b,vvi-MIR169d,vvi-MIR169a,	mdm-MIR169g	ctgaagtcttgcatgcaaacatgagataataatgtgtgctgCAGCCAAGGATGACTTGCCGGaagcaaccaacttctcctcttcttctgttatttacaggtatataatatgttcatcaaataaaattggctcttaggggtaaaacgtacgttaaagaaaattagttcagatcataggttacgatttgtttagctaccaacgccagcgttaacatcgtggattagtggcatttaggaagaagtaggtgtgttttcgacaggtgattaccggcaagttgtccctggctacatgtctgtctcatgtttacatgtt	mdm-MIR169g-p3	caagttgtccctggctacatgt	3'	New	gp2a	...((((.((((..((((((((((.((.(((((((((..(((((((((((((((((..((.......(((...)))..))..))))))))...)))))))))..))))))))).)).))))))))))..))))))))...	134	44.3	-72.9	1.2	0	0	0	5	0	7	0	0	0	4.94604	0	6.956	low
39	40	ath-miR170-5p_R+1	TATTGGCCTGGTTCACTCAGAT	22	NW_015902595.1	+	231	355	ctatgaaacagtaactcaggTATTGGCCTGGTTCACTCAGACaacaagatgaaactatttgaatattgaatggtggagttttggtttgaTTGAGCCGTGCCAATATCTCAgtttctctttcacca	14	ptc-MIR171i,ath-MIR171a,ath-MIR170,bdi-MIR171e,aly-MIR171a,aly-MIR170,lus-MIR171e,lus-MIR171b,lus-MIR171c,bra-MIR171e,bna-MIR171f,bna-MIR171g,cas-MIR170,cas-MIR171a,	ath-MIR170	cgagagagtccctctgaTATTGGCCTGGTTCACTCAGAttctcttttactaactcatcTGATTGAGCCGTGTCAATATCtcagtcctctctcg	ath-miR170-5p	TATTGGCCTGGTTCACTCAGA	5'	Diff	gp2a	...(((((.((.((((.((((((((((..((((((.((((((..((((((...((((((..(...)..))))))...)))))))))))).))))))..)))))))))).)))).)).)))))...	119	39.2	-49.3	1	3	3.5	9.5	4.5	15.5	9.5	3.18165	3.51138	9.10872	4.45144	14.9097	9.44028	middle
39	41	bdi-MIR171e-p3	TTGAGCCGTGCCAATATCTCT	21	NW_015902595.1	+	231	355	ctatgaaacagtaactcaggTATTGGCCTGGTTCACTCAGACaacaagatgaaactatttgaatattgaatggtggagttttggtttgaTTGAGCCGTGCCAATATCTCAgtttctctttcacca	14	ptc-MIR171i,ath-MIR171a,ath-MIR170,bdi-MIR171e,aly-MIR171a,aly-MIR170,lus-MIR171e,lus-MIR171b,lus-MIR171c,bra-MIR171e,bna-MIR171f,bna-MIR171g,cas-MIR170,cas-MIR171a,	bdi-MIR171e	gaaggagcgatattggtgaggttcaatccgatgctagattttacatcagtgttaagatctgtatcTGATTGAGCCGTGCCAATATCtctcttctt	bdi-MIR171e-p3	TTGAGCCGTGCCAATATCtct	3'	New	gp2a	...(((((.((.((((.((((((((((..((((((.((((((..((((((...((((((..(...)..))))))...)))))))))))).))))))..)))))))))).)))).)).)))))...	119	39.2	-49.3	1	2.5	0	0	0	0	0	2.65137	0	0	0	0	0	low
40	40	ath-miR170-5p_R+1	TATTGGCCTGGTTCACTCAGAT	22	NW_015828385.1	+	8976	9100	ctatgaaacagtaactcaggTATTGGCCTGGTTCACTCAGACaacaagatgaaactatttgaatattgaatggtggagttttggtttgattgagccgtgccaatatctcagtttctctttcacca	13	ptc-MIR171i,ath-MIR171a,ath-MIR170,aly-MIR171a,aly-MIR170,lus-MIR171e,lus-MIR171b,lus-MIR171c,bra-MIR171e,bna-MIR171f,bna-MIR171g,cas-MIR170,cas-MIR171a,	ath-MIR170	cgagagagtccctctgaTATTGGCCTGGTTCACTCAGAttctcttttactaactcatcTGATTGAGCCGTGTCAATATCtcagtcctctctcg	ath-miR170-5p	TATTGGCCTGGTTCACTCAGA	5'	Diff	gp2a	...(((((.((.((((.((((((((((..((((((.((((((..((((((...((((((..(...)..))))))...)))))))))))).))))))..)))))))))).)))).)).)))))...	119	39.2	-49.3	1	3	3.5	9.5	4.5	15.5	9.5	3.18165	3.51138	9.10872	4.45144	14.9097	9.44028	middle
41	43	mtr-MIR171c-p3	TTGAGCCGTGCCAATATTT	19	NW_015906074.1	+	108	227	cttatgaaacagtaactttgaTATTGGCCAGGTTCACTCAGACagatacagaacatcattttgaatgttggagttttgctttgaTTGAGCCGTGCCAATATCTcagttctctttcattac	12	ptc-MIR171i,mtr-MIR171c,ath-MIR171a,ath-MIR170,aly-MIR171a,aly-MIR170,lus-MIR171c,bra-MIR171e,bna-MIR171f,bna-MIR171g,cas-MIR170,cas-MIR171a,	mtr-MIR171c	attgagatattggcttggttcactcagaagaaacaaaaaataacactacttgtgaatgttttgattttgattttgatttTGATTGAGCCGTGCCAATATTtcaaa	mtr-MIR171c-p3	TTGAGCCGTGCCAATATTt	3'	New	gp2a	...((((((.((.((((..(((((((((..((((((.(((((((((.....((((((.....).))))).....)))).))))).))))))..)))))))))..)))))).))))))...	114	37.5	-40.6	0.9	0	2.5	4	3	4	3	0	2.50813	3.83525	2.96762	3.84766	2.98114	low
42	44	fve-MIR171g-p5	TGATGTTGGAATGGCTCAATC	21	NW_015860977.1	+	46569	46684	ctagctatcaagtttcaaatgTGATGTTGGAATGGCTCAATCtaatcaaaatttccaacatatttggtcctttaatttgaTTGAGCCGTGCCAATATCATAttggcttccagcgag	2	gma-MIR171g,fve-MIR171g,	fve-MIR171g	gaaatgtatgatgttggaatggctcaatcaaatcaaatctcccaagaatcgggtcctttgattTGATTGAGCCGTGCCAATATCacagttacattatc	fve-MIR171g-p5	tgatgttggaatggctcaatc	5'	New	gp2a	...(((...((((....(((((((((((((.(((((((((((.(((.(((....((((.....))))...))).))).))))))))))).))))))))))))).))))..)))...	110	37.1	-41.6	1	46	41	34	34	51.5	23	48.7853	41.1333	32.5996	33.6331	49.5386	22.8554	middle
42	45	gma-MIR171g-p3	TTGAGCCGTGCCAATATCATA	21	NW_015860977.1	+	46569	46684	ctagctatcaagtttcaaatgTGATGTTGGAATGGCTCAATCtaatcaaaatttccaacatatttggtcctttaatttgaTTGAGCCGTGCCAATATCATAttggcttccagcgag	2	gma-MIR171g,fve-MIR171g,	gma-MIR171g	tgatgttggcttggctcaatcaaattaaaatttttaaagattttgttaacttttttgatcTGATTGAGCCGTGCCAATATCatattcatc	gma-MIR171g-p3	TTGAGCCGTGCCAATATCata	3'	New	gp2a	...(((...((((....(((((((((((((.(((((((((((.(((.(((....((((.....))))...))).))).))))))))))).))))))))))))).))))..)))...	110	37.1	-41.6	1	16	21	17.5	32	31	26	16.9688	21.0683	16.7792	31.6547	29.8194	25.8366	middle
43	44	fve-MIR171g-p5	TGATGTTGGAATGGCTCAATC	21	NW_015892236.1	+	52499	52621	aatactagctatcaagtttcaagtgTGATGTTGGAATGGCTCAATCtaatcaaaatttccaacatttttggtcatttaatttgaTTGAGCCGTGCCAATATCATAttggcttcgctcagtctt	2	gma-MIR171g,fve-MIR171g,	fve-MIR171g	gaaatgtatgatgttggaatggctcaatcaaatcaaatctcccaagaatcgggtcctttgattTGATTGAGCCGTGCCAATATCacagttacattatc	fve-MIR171g-p5	tgatgttggaatggctcaatc	5'	New	gp2a	...((((((....((((....(((((((((((((.(((((((((((.(((..((((..((((.....))))..)))).))).))))))))))).))))))))))))).)))).))).)))...	117	35	-42.2	1	46	41	34	34	51.5	23	48.7853	41.1333	32.5996	33.6331	49.5386	22.8554	middle
43	45	gma-MIR171g-p3	TTGAGCCGTGCCAATATCATA	21	NW_015892236.1	+	52499	52621	aatactagctatcaagtttcaagtgTGATGTTGGAATGGCTCAATCtaatcaaaatttccaacatttttggtcatttaatttgaTTGAGCCGTGCCAATATCATAttggcttcgctcagtctt	2	gma-MIR171g,fve-MIR171g,	gma-MIR171g	tgatgttggcttggctcaatcaaattaaaatttttaaagattttgttaacttttttgatcTGATTGAGCCGTGCCAATATCatattcatc	gma-MIR171g-p3	TTGAGCCGTGCCAATATCata	3'	New	gp2a	...((((((....((((....(((((((((((((.(((((((((((.(((..((((..((((.....))))..)))).))).))))))))))).))))))))))))).)))).))).)))...	117	35	-42.2	1	16	21	17.5	32	31	26	16.9688	21.0683	16.7792	31.6547	29.8194	25.8366	middle
44	46	cme-miR171b_1ss19AT	TTGAGCCGTGCCAATATCTCG	21	NW_015799748.1	-	7636	7732	tgcatacgagatattggtgcggttcaattagaaagctgagttcttttttgttttgaactctgttatttgaTTGAGCCGTGCCAATATCTCGtatatt	7	mtr-MIR171c,gma-MIR171u,gma-MIR171e,bdi-MIR171e,csi-MIR171f,cme-MIR171d,fve-MIR171e,	cme-MIR171d	ggaacgagatgttggtccggttcaataagaaagtagtgctctgtttaacttgggttcttctttttttaTTGAGCCGTGCCAATATCACGtgttgtatt	cme-miR171b	TTGAGCCGTGCCAATATCACG	3'	Diff	gp2a	...((((((((((((((..(((((((((((((.(((.((((((...........)))))).))).)))))))))))))..))))))))))))))...	91	36.1	-54.8	1.6	351.5	396.5	547	385	579	600	372.783	397.789	524.471	380.845	556.949	596.228	middle
45	47	stu-miR171c-3p	TGATTGAGCCGTGTCAATATC	21	NW_015813904.1	-	4217	4337	tgtaaagatagtagaatgatgttggaatggctcaatcaaatcaaattccccaaatatttgtgtcatttaattTGATTGAGCCGTGCCAATATCatcttagctatgctcttctatctttttt	7	stu-MIR171c,sly-MIR171f,mtr-MIR171c,ath-MIR170,aly-MIR170,cme-MIR171d,cas-MIR170,	stu-MIR171c	TATTGGCCTGGTTCACTCAGAcacacactattttgcttTGATTGAGCCGTGTCAATATC	stu-miR171c-3p	TGATTGAGCCGTGTCAATATC	3'	Yes	gp2a	...((((((((.(((((((((((((.(((((((((((((((.((((....(((....)))....)))).))))))))))))))).))))))))))...........))).))))))))...	115	32.2	-43.9	1.1	0	0	0	0	5.5	8	0	0	0	0	5.29053	7.94971	low
46	48	bra-MIR171a-p5_2ss5AG21CG	AGATGTTGGTGTGGTTCAATG	21	NW_015818345.1	+	21052	21209	gaagaacggatgttcagcttgtaggtatatcatacgAGATGTTGGTGTGGTTCAATGagaaagcagttgtcaaacaagttttgaccctactttttgattgagccgtgccaatatcacgtgtcactagtctataagttttttttatatttaagttcatg	2	bra-MIR171a,bna-MIR171e,	bra-MIR171a	cgagatattggtgtggttcaatcagaaaaccacactcttttgttgtagagatcggtttgtttgaTTGAGCCGTGCCAATATCACG	bra-MIR171a-p5	agatattggtgtggttcaatc	5'	New	gp2a	...((((.(((((..((((((((((......(((((.((((((((..(((((((((.((((((.((..((((((.....)))))).)).)))))).)))))))))..)))))))).)))))......))))))))))......)))))...))))...	152	36.7	-57.6	1	7	8.5	14.5	13	20.5	11	7.42384	8.52764	13.9028	12.8597	19.7193	10.9309	middle
47	48	bra-MIR171a-p5_2ss5AG21CG	AGATGTTGGTGTGGTTCAATG	21	NW_015947320.1	+	42597	42744	ggaaaaacggatgttcagcttgtaggtatatcatacgAGATGTTGGTGCGGTTCAATGagaaagcagttgtcaaactagttttgaccctactttttgattgagccgtgccaatatcacgtgtcactagtagttgtcataagttttttt	2	bra-MIR171a,bna-MIR171e,	bra-MIR171a	cgagatattggtgtggttcaatcagaaaaccacactcttttgttgtagagatcggtttgtttgaTTGAGCCGTGCCAATATCACG	bra-MIR171a-p5	agatattggtgtggttcaatc	5'	New	gp2a	.(((((((..(((..(((((..(((.......(((((.((((((((..(((((((((.((((((.((..((((((.....)))))).)).)))))).)))))))))..)))))))).)))))..)))..))))).)))..))))))).	146	39.2	-60.8	1	7	8.5	14.5	13	20.5	11	7.42384	8.52764	13.9028	12.8597	19.7193	10.9309	middle
48	49	mtr-miR171c	TGATTGAGCCGTGCCAATATT	21	NW_015863248.1	-	21600	21701	aaagcttgtagaatgatgttggaatgactcaatcaaatcaaattccccaaacattttgtgtcatttaattTGATTGAGCCGTGCCAATATCatcttagcctc	2	mtr-MIR171c,cme-MIR171d,	mtr-MIR171c	attgagatattggcttggttcactcagaagaaacaaaaaataacactacttgtgaatgttttgattttgattttgatttTGATTGAGCCGTGCCAATATTtcaaa	mtr-miR171c	TGATTGAGCCGTGCCAATATT	3'	Yes	gp2a	...(((...((.((((((((((.(((.(((((((((((.((((....((((...))))....)))).))))))))))).))).)))))))))))).)))...	96	35.3	-31.7	0.9	0	0	0	0	3	3.5	0	0	0	0	2.88574	3.478	low
49	50	mtr-miR171b	TGATTGAGCCGCGTCAATATC	21	NW_015885007.1	-	435	603	tcaagaagaagggaagcatatattcaggaagatatatagagatattgatgcgactcaatctgaagacgtggttatatatataaatagaggtttagccatgtgatttTGATTGAGCCGCGTCAATATCtctcttaatataattccgtgtaactttatgtcttcttctcaa	13	mtr-MIR171b,gma-MIR171p,gma-MIR171n,mdm-MIR171b,mdm-MIR171a,lja-MIR171b,ppe-MIR171h,vvi-MIR171b,lus-MIR171j,lus-MIR171g,cme-MIR171h,fve-MIR171h,aof-MIR171c,	mtr-MIR171b	agcaaggtattggcgcgcctcaatttgaatacatggctataaaaatgcatcatatcagccatgtagttTGATTGAGCCGCGTCAATATCttgtt	mtr-miR171b	TGATTGAGCCGCGTCAATATC	3'	Yes	gp2a	...((((((((....(((((....((((((..((((((((((((((((((((.(((((((..((.(((((((((..................)))))))))..))..))))))).)))))))))))))))....))))).)))).))......)))))))))))))...	163	33.7	-62.2	1.1	16.5	25.5	14	19	22	32.5	17.4991	25.5829	13.4234	18.795	21.1621	32.2957	middle
50	50	mtr-miR171b	TGATTGAGCCGCGTCAATATC	21	NW_015927449.1	+	1088	1182	tatagagatattgatgcgactcaatctgaagacgtgattatatataaatataatcagccatgtgatttTGATTGAGCCGCGTCAATATCtctctt	13	mtr-MIR171b,gma-MIR171p,gma-MIR171n,mdm-MIR171b,mdm-MIR171a,lja-MIR171b,ppe-MIR171h,vvi-MIR171b,lus-MIR171j,lus-MIR171g,cme-MIR171h,fve-MIR171h,aof-MIR171c,	mtr-MIR171b	agcaaggtattggcgcgcctcaatttgaatacatggctataaaaatgcatcatatcagccatgtagttTGATTGAGCCGCGTCAATATCttgtt	mtr-miR171b	TGATTGAGCCGCGTCAATATC	3'	Yes	gp2a	...(((((((((((((((.(((((((..((.((((((((((((....)))))))))....)))..))..))))))).)))))))))))))))...	89	33.7	-40.7	1.3	16.5	25.5	14	19	22	32.5	17.4991	25.5829	13.4234	18.795	21.1621	32.2957	middle
51	51	stu-miR171c-3p_2ss9CT14TC	TGATTGAGTCGTGCCAATATC	21	NW_015941823.1	-	31277	31363	tgggatattggtgtggttcaattagattacaatgtctccacatgatcgtgaagttttgcaattTGATTGAGCCGTGCCAATATCaca	7	stu-MIR171c,sly-MIR171f,mtr-MIR171a,ath-MIR170,aly-MIR170,cme-MIR171d,cas-MIR170,	stu-MIR171c	TATTGGCCTGGTTCACTCAGAcacacactattttgcttTGATTGAGCCGTGTCAATATC	stu-miR171c-3p	TGATTGAGCCGTGTCAATATC	3'	Diff	gp2a	...((((((((..(((((((((((((((.(((...((.(((......))).))..))).)))))))))))))))..))))))))...	81	39.1	-39.6	1.2	5	17	0	5	9.5	31.5	5.30275	17.0553	0	4.94604	9.13819	31.302	middle
52	52	mtr-miR172b_L+1	AAGAATCTTGATGATGCTGCAT	22	NW_015899659.1	-	47998	48139	acagttgttacttgcagctgcagcattatcaagattcacatacaaatcatgtggggcagaaaacataggttctaaaaatctgctccccacgttttttaaacatGAGAATCTTGATGATGCTGCATcaacaaataatgacttc	1	mtr-MIR172b,	mtr-MIR172b	tgtttgcagatgtagcatcatcaagattcatatgtgaatgatgcagagtggaactgctaatatttcaattgatcttttgaaataAGAATCTTGATGATGCTGCATcagccatat	mtr-miR172b	AGAATCTTGATGATGCTGCAT	3'	Diff	gp2a	..(((..(((.(((....(((((((((((((((((((.(((..(((..((((((((.((......((((((.....))))))))))))))))..)))....))).)))))))))))))))))))....))).)))..)))..	138	37.3	-54.2	1	0	0	6	6	0	0	0	0	5.75288	5.93525	0	0	low
53	53	stu-miR172d-3p	GGAATCTTGATGATGCTGCAG	21	NW_015908520.1	-	66195	66378	atggatcaatgaatattattgccaaagatctcataccctcagtcagtttttgctggtggagcatcatcaagattcacatagcatttttagggctttttagccctatggtttattgatatgGGAATCTTGATGATGCTGCAGcggcgaaaaaatggctatttttgtaacgtttttcatggtcgtg	18	stu-MIR172d,sly-MIR172d,ptc-MIR172h,ptc-MIR172g,gma-MIR172c,gma-MIR172d,gma-MIR172e,mdm-MIR172l,ppe-MIR172d,mes-MIR172e,mes-MIR172f,vvi-MIR172c,csi-MIR172c,lus-MIR172e,lus-MIR172i,cme-MIR172a,rco-MIR172,tcc-MIR172a,	stu-MIR172d	GGAGCATCATCAAGATTCACAtagctatattagggcttttataatttttaaaagccctatgacgatgtgtgGGAATCTTGATGATGCTGCAG	stu-miR172d-3p	GGAATCTTGATGATGCTGCAG	3'	Yes	gp2a	...((((.(((((.....(((.(((((((...........(((((.(((((((((.((.((((((((((((((((.((((.((....(((((((....)))))))........)).)))).)))))))))))))))).)).)))))))))..))))))))))))))).....)))))))))...	178	38.6	-71.2	1	71	36	91	48.5	43	85.5	75.299	36.1171	87.252	47.9766	41.3623	84.9625	middle
54	53	stu-miR172d-3p	GGAATCTTGATGATGCTGCAG	21	NW_015936375.1	-	45307	45428	ctcagtcagtttttgctggtggagcatcatcaagattcacatagcctttttagggatttttggccctatggcttattgatatgGGAATCTTGATGATGCTGCAGcggcgaaaaatggctatt	18	stu-MIR172d,sly-MIR172d,ptc-MIR172h,ptc-MIR172g,gma-MIR172d,gma-MIR172e,gma-MIR172c,mdm-MIR172l,ppe-MIR172d,mes-MIR172e,mes-MIR172f,vvi-MIR172c,csi-MIR172c,lus-MIR172i,lus-MIR172e,cme-MIR172a,rco-MIR172,tcc-MIR172a,	stu-MIR172d	GGAGCATCATCAAGATTCACAtagctatattagggcttttataatttttaaaagccctatgacgatgtgtgGGAATCTTGATGATGCTGCAG	stu-miR172d-3p	GGAATCTTGATGATGCTGCAG	3'	Yes	gp2a	...(((((.(((((((((.((.((((((((((((((((.(((((((....(((((........))))).)))).......))).)))))))))))))))).)).))))))))).)))))...	116	42.6	-59.5	1.1	71	36	91	48.5	43	85.5	75.299	36.1171	87.252	47.9766	41.3623	84.9625	middle
55	54	sly-miR390a-5p_R+1_1ss19AG	AAGCTCAGGAGGGATAGCGCCT	22	NW_015887045.1	+	40189	40316	gtgggagaatctgtaAAGCTCAGGAGGGATAGCGCCAtggatgaatattatacatgagcttaataacaatattgcttgttttaaccatcCATAGCGCTATCCATCCTGAGtttcatagcttcttcatg	16	sly-MIR390a,osa-MIR390,bdi-MIR390a,mdm-MIR390b,sbi-MIR390,mes-MIR390,zma-MIR390b,zma-MIR390a,lus-MIR390b,lus-MIR390c,cme-MIR390d,ata-MIR390,ghr-MIR390a,ghr-MIR390c,ghr-MIR390b,rco-MIR390b,	sly-MIR390a	agagatcaactatgaatgttgttcttgtggaaatggcatggggaatctataAAGCTCAGGAGGGATAGCACCatgaatacatcttaatggctatctatagCGCTATCCATCCTGAGTTTTAtggcttcttcatgctcgcttttggtgcttcatgttgatcttt	sly-miR390a-5p	AAGCTCAGGAGGGATAGCACC	5'	Diff	gp2a	...((((((.((((.((((((((((.(((((((((.(((((((....(((...(..(((..............)))..)..))).))))))).))))))))).)))))))))).)))).))))))...	122	39.8	-57.6	1.1	0	0	0	0	6	0	0	0	0	0	5.77149	0	low
55	55	sly-MIR390a-p3_1ss1TC	CATAGCGCTATCCATCCTGAG	21	NW_015887045.1	+	40189	40316	gtgggagaatctgtaAAGCTCAGGAGGGATAGCGCCAtggatgaatattatacatgagcttaataacaatattgcttgttttaaccatcCATAGCGCTATCCATCCTGAGtttcatagcttcttcatg	16	sly-MIR390a,osa-MIR390,bdi-MIR390a,mdm-MIR390b,sbi-MIR390,mes-MIR390,zma-MIR390b,zma-MIR390a,lus-MIR390b,lus-MIR390c,cme-MIR390d,ata-MIR390,ghr-MIR390a,ghr-MIR390c,ghr-MIR390b,rco-MIR390b,	sly-MIR390a	agagatcaactatgaatgttgttcttgtggaaatggcatggggaatctataAAGCTCAGGAGGGATAGCACCatgaatacatcttaatggctatctatagCGCTATCCATCCTGAGTTTTAtggcttcttcatgctcgcttttggtgcttcatgttgatcttt	sly-MIR390a-p3	tatagCGCTATCCATCCTGAG	3'	New	gp2a	...((((((.((((.((((((((((.(((((((((.(((((((....(((...(..(((..............)))..)..))).))))))).))))))))).)))))))))).)))).))))))...	122	39.8	-57.6	1.1	6	0	9	6	15	17.5	6.36329	0	8.62931	5.93525	14.4287	17.39	middle
56	56	osa-miR390-5p_R+1	AAGCTCAGGAGGGATAGCGCCT	22	NW_015928966.1	-	8805	8929	aatgtgtgggagaatctgtaAAGCTCAGGAGGGATAGCGCCAtggatgaatattagtaacactattgcttgttttagccatctgtagCGCTATCCATCCTGAGTTTCAtagcttcttcatgctct	9	osa-MIR390,bdi-MIR390a,sbi-MIR390,zma-MIR390b,zma-MIR390a,lus-MIR390b,lus-MIR390c,cme-MIR390d,ata-MIR390,	osa-MIR390	ggtatggaacaatccttgAAGCTCAGGAGGGATAGCGCCtcgaaatcaaactaggCGCTATCTATCCTGAGCTCCatggtttgttcttacc	osa-miR390-5p	AAGCTCAGGAGGGATAGCGCC	5'	Diff	gp2a	...(..(.((((((.((((.((((((((((.(((((((((.(..((((..((..(((((.....))))).....))..))))..).))))))))).)))))))))).)))).)))))))..)...	119	42.4	-55.2	1	0	0	0	0	6	0	0	0	0	0	5.77149	0	low
57	58	ath-miR390b-3p_1ss20CT	CGCTATCCATCCTGAGTTCT	20	NW_015857886.1	+	61647	61780	gatctgtaAAGCTCAGGAGGGATAGCACCatgaaaaatgatgtgatatatgttggttttaaatttttgaatctttttttttcccaacaaaactttcaattattttggCGCTATCCATCCTGAGTTCTatggctt	23	nta-MIR390a,stu-MIR390,sly-MIR390a,ptc-MIR390b,ptc-MIR390d,gma-MIR390d,gma-MIR390b,ath-MIR390a,ath-MIR390b,lja-MIR390a,aly-MIR390b,aly-MIR390a,csi-MIR390a,lus-MIR390d,lus-MIR390b,lus-MIR390a,lus-MIR390c,cme-MIR390d,bna-MIR390a,bna-MIR390c,cas-MIR390a,cas-MIR390b,rco-MIR390a,	ath-MIR390b	gagaaatagctataAAGCTCAGGAGGGATAGCGCCatggctcaccagtgctgtatgttttgtatatgcgtacatgtatatctgttggCGCTATCCATCCTGAGTTCCatagcttcttctt	ath-miR390b-3p	CGCTATCCATCCTGAGTTCC	3'	Diff	gp2a	...(..((.(((((((((.(((((((.(((....(((((((.(((....((((((....(((.............)))....))))))......))))))))))))).))))))).))))))))).))..)...	128	33.6	-42.5	0.9	41	57	68	46	115	40	43.4825	57.1853	65.1993	45.5036	110.62	39.7486	middle
58	59	stu-miR391-5p_L-1R+2	ACGCAGGAGAGATGATGCTGGA	22	NW_015842264.1	+	23378	23534	gaagggagaagcatcaaaaggcttgctACGCAGGAGAGATGATGCTGGAtaatggaccatccctgcttagctatctcaagagattggagggagctttgattatttagccAGCATCATACTCCTGCATATTaagcctcaaaagatgctataaaccaag	3	stu-MIR391,sly-MIR391,gma-MIR391,	stu-MIR391	TACGCAGGAGAGATGATGCTGgacgatagagatatgagaatattaaaggggctttaatttattggccaGCATCATACTCCTGCATATT	stu-miR391-5p	TACGCAGGAGAGATGATGCTG	5'	Diff	gp2a	...((....((((((...((((((..((.(((((((..((((((((((..((((....(((...((((..((((((....))).)))...))))...)))))))...)))))))))).))))))).))..)))))).....)))))).....))...	151	43.9	-58.3	0.8	408	337	358	246	281	236	432.704	338.096	343.255	243.345	270.298	234.516	middle
58	60	stu-miR391-3p_L+1	AGCATCATACTCCTGCATATT	21	NW_015842264.1	+	23378	23534	gaagggagaagcatcaaaaggcttgctACGCAGGAGAGATGATGCTGGAtaatggaccatccctgcttagctatctcaagagattggagggagctttgattatttagccAGCATCATACTCCTGCATATTaagcctcaaaagatgctataaaccaag	3	stu-MIR391,sly-MIR391,gma-MIR391,	stu-MIR391	TACGCAGGAGAGATGATGCTGgacgatagagatatgagaatattaaaggggctttaatttattggccaGCATCATACTCCTGCATATT	stu-miR391-3p	GCATCATACTCCTGCATATT	3'	Diff	gp2a	...((....((((((...((((((..((.(((((((..((((((((((..((((....(((...((((..((((((....))).)))...))))...)))))))...)))))))))).))))))).))..)))))).....)))))).....))...	151	43.9	-58.3	0.8	6	7	0	0	5	0	6.36329	7.02276	0	0	4.80957	0	low
59	61	sly-miR391_2ss10AG17GA	ACGCAGGAGGGATGATACTGGA	22	NW_015926495.1	+	305002	305086	aataggttttgctACGCAGGAGGGATGATACTGGAcgagctgggctactttggccagtatcattctcctacgtaataaaccttaa	2	stu-MIR391,sly-MIR391,	sly-MIR391	aaggcttgctACGCAGGAGAGATGATGCTGGAcgatagagaaaatgggatttaatttattggccagcatcatactcctgcatattaagcct	sly-miR391	ACGCAGGAGAGATGATGCTGGA	5'	Diff	gp2a	...((((((...((((.((((.((((((((((((.(((...((....))))).)))))))))))))))).))))..))))))...	79	44.7	-34.8	0.9	35	26	27	28	46	30	37.1192	26.0845	25.8879	27.6978	44.2481	29.8114	middle
60	62	stu-miR393-5p	TCCAAAGGGATCGCATTGATCC	22	NW_015793138.1	+	18231	18366	cccagcaactaaaggaggcgTCCAAAGGGATCGCATTGATCCcatttcatttgtgtttctatatttctttccagaaataattaaaatactgagtttggATCATGCTATCCCTTTGGACTcatcctttggagctatt	43	stu-MIR393,sly-MIR393,ptc-MIR393b,ptc-MIR393a,mtr-MIR393a,mtr-MIR393b,gma-MIR393c,gma-MIR393e,gma-MIR393a,gma-MIR393d,gma-MIR393f,gma-MIR393g,gma-MIR393b,osa-MIR393a,ath-MIR393b,ath-MIR393a,bdi-MIR393a,mdm-MIR393h,mdm-MIR393g,sbi-MIR393a,aly-MIR393a,aly-MIR393b,ppe-MIR393a,mes-MIR393b,mes-MIR393a,zma-MIR393b,vvi-MIR393b,vvi-MIR393a,csi-MIR393c,csi-MIR393a,lus-MIR393a,lus-MIR393c,cme-MIR393b,cme-M…	stu-MIR393	TCCAAAGGGATCGCATTGATCCtgtgtcccaaattaattaactggggtctatgggATCATGCGATCTCTTCGGAAT	stu-miR393-5p	TCCAAAGGGATCGCATTGATCC	5'	Yes	gp2a	...(((..((((((((...((((((((((((.((((.(((((...((((...((((((...(((((((....)))))))....))))))))))...))))))))).))))))))))))...)))))))).)))...	130	39	-56.3	1.1	407.5	539.5	293.5	116.5	853.5	537	432.174	541.254	281.412	115.243	820.994	533.624	middle
60	63	ptc-miR393a-3p_1ss20TC	ATCATGCTATCCCTTTGGACT	21	NW_015793138.1	+	18231	18366	cccagcaactaaaggaggcgTCCAAAGGGATCGCATTGATCCcatttcatttgtgtttctatatttctttccagaaataattaaaatactgagtttggATCATGCTATCCCTTTGGACTcatcctttggagctatt	43	stu-MIR393,sly-MIR393,ptc-MIR393b,ptc-MIR393a,mtr-MIR393a,mtr-MIR393b,gma-MIR393c,gma-MIR393e,gma-MIR393a,gma-MIR393d,gma-MIR393f,gma-MIR393g,gma-MIR393b,osa-MIR393a,ath-MIR393b,ath-MIR393a,bdi-MIR393a,mdm-MIR393h,mdm-MIR393g,sbi-MIR393a,aly-MIR393a,aly-MIR393b,ppe-MIR393a,mes-MIR393b,mes-MIR393a,zma-MIR393b,vvi-MIR393b,vvi-MIR393a,csi-MIR393c,csi-MIR393a,lus-MIR393a,lus-MIR393c,cme-MIR393b,cme-M…	ptc-MIR393a	agaggaggcaTCCAAAGGGATCGCATTGATCccaagtgtctgtcccccataattttggATCATGCTATCCCTTTGGATTcctcct	ptc-miR393a-3p	ATCATGCTATCCCTTTGGATT	3'	Diff	gp2a	...(((..((((((((...((((((((((((.((((.(((((...((((...((((((...(((((((....)))))))....))))))))))...))))))))).))))))))))))...)))))))).)))...	130	39	-56.3	1.1	19.5	15.5	35	20.5	48.5	16	20.6807	15.5504	33.5584	20.2788	46.6529	15.8994	middle
61	64	stu-miR393-5p_R-1	TCCAAAGGGATCGCATTGATC	21	NW_015837665.1	+	9918	10035	tacagcaactaaaggaggcgTCCAAAGGGATCGCATTGATCccatttttgtttctattaatttaagaaactgaatttggATCATGCTATCCCTTTGGACTcctcctttcgaagctaca	73	stu-MIR393,sly-MIR393,ptc-MIR393a,ptc-MIR393c,ptc-MIR393b,mtr-MIR393a,mtr-MIR393b,gma-MIR393b,gma-MIR393c,gma-MIR393e,gma-MIR393a,gma-MIR393i,gma-MIR393j,gma-MIR393h,gma-MIR393k,gma-MIR393d,gma-MIR393f,gma-MIR393g,osa-MIR393b,osa-MIR393a,ath-MIR393b,ath-MIR393a,bdi-MIR393a,bdi-MIR393b,mdm-MIR393a,mdm-MIR393f,mdm-MIR393h,mdm-MIR393g,mdm-MIR393b,mdm-MIR393c,mdm-MIR393d,mdm-MIR393e,sbi-MIR393b,sbi-M…	stu-MIR393	TCCAAAGGGATCGCATTGATCCtgtgtcccaaattaattaactggggtctatgggATCATGCGATCTCTTCGGAAT	stu-miR393-5p	TCCAAAGGGATCGCATTGATCC	5'	Diff	gp2a	...(((....((((((((.((((((((((((.((((.(((((...((..((((((.........))))))..))...))))))))).)))))))))))).))))))))....)))...	112	39.8	-56.1	1.2	58.5	52	45.5	16.5	71.5	47	62.0421	52.1691	43.626	16.3219	68.7769	46.7045	middle
61	63	ptc-miR393a-3p_1ss20TC	ATCATGCTATCCCTTTGGACT	21	NW_015837665.1	+	9918	10035	tacagcaactaaaggaggcgTCCAAAGGGATCGCATTGATCccatttttgtttctattaatttaagaaactgaatttggATCATGCTATCCCTTTGGACTcctcctttcgaagctaca	73	stu-MIR393,sly-MIR393,ptc-MIR393a,ptc-MIR393c,ptc-MIR393b,mtr-MIR393a,mtr-MIR393b,gma-MIR393b,gma-MIR393c,gma-MIR393e,gma-MIR393a,gma-MIR393i,gma-MIR393j,gma-MIR393h,gma-MIR393k,gma-MIR393d,gma-MIR393f,gma-MIR393g,osa-MIR393b,osa-MIR393a,ath-MIR393b,ath-MIR393a,bdi-MIR393a,bdi-MIR393b,mdm-MIR393a,mdm-MIR393f,mdm-MIR393h,mdm-MIR393g,mdm-MIR393b,mdm-MIR393c,mdm-MIR393d,mdm-MIR393e,sbi-MIR393b,sbi-M…	ptc-MIR393b	agaggaggcaTCCAAAGGGATCGCATTGATCccgagtgtccctggccataattttggATCATGCTATCCCTTTGGATTcctcct	ptc-miR393a-3p	ATCATGCTATCCCTTTGGATT	3'	Diff	gp2a	...(((....((((((((.((((((((((((.((((.(((((...((..((((((.........))))))..))...))))))))).)))))))))))).))))))))....)))...	112	39.8	-56.1	1.2	19.5	15.5	35	20.5	48.5	16	20.6807	15.5504	33.5584	20.2788	46.6529	15.8994	middle
62	62	stu-miR393-5p	TCCAAAGGGATCGCATTGATCC	22	NW_015898807.1	+	1410	1518	catagcgctggtggagtatTCCAAAGGGATCGCATTGATCCtgtgtcccaattacagtctaatgggATCATGCGATCTCTTCGGATTtctccatattactggctctaga	72	stu-MIR393,sly-MIR393,ptc-MIR393a,ptc-MIR393b,ptc-MIR393c,mtr-MIR393a,mtr-MIR393b,gma-MIR393c,gma-MIR393e,gma-MIR393a,gma-MIR393d,gma-MIR393f,gma-MIR393g,gma-MIR393i,gma-MIR393j,gma-MIR393h,gma-MIR393k,osa-MIR393a,osa-MIR393b,ath-MIR393b,ath-MIR393a,bdi-MIR393a,bdi-MIR393b,mdm-MIR393h,mdm-MIR393g,mdm-MIR393a,mdm-MIR393f,mdm-MIR393b,mdm-MIR393c,mdm-MIR393d,mdm-MIR393e,sbi-MIR393a,sbi-MIR393b,aly-M…	stu-MIR393	TCCAAAGGGATCGCATTGATCCtgtgtcccaaattaattaactggggtctatgggATCATGCGATCTCTTCGGAAT	stu-miR393-5p	TCCAAAGGGATCGCATTGATCC	5'	Yes	gp2a	..(((.((..((((((...(((.((((((((((((.(((((..(.................)..))))))))))))))))).)))...)))).....))..)).)))..	105	45.9	-46.5	0.9	407.5	539.5	293.5	116.5	853.5	537	432.174	541.254	281.412	115.243	820.994	533.624	middle
62	65	stu-miR393-3p_1ss20AT	ATCATGCGATCTCTTCGGATT	21	NW_015898807.1	+	1410	1518	catagcgctggtggagtatTCCAAAGGGATCGCATTGATCCtgtgtcccaattacagtctaatgggATCATGCGATCTCTTCGGATTtctccatattactggctctaga	72	stu-MIR393,sly-MIR393,ptc-MIR393a,ptc-MIR393b,ptc-MIR393c,mtr-MIR393a,mtr-MIR393b,gma-MIR393c,gma-MIR393e,gma-MIR393a,gma-MIR393d,gma-MIR393f,gma-MIR393g,gma-MIR393i,gma-MIR393j,gma-MIR393h,gma-MIR393k,osa-MIR393a,osa-MIR393b,ath-MIR393b,ath-MIR393a,bdi-MIR393a,bdi-MIR393b,mdm-MIR393h,mdm-MIR393g,mdm-MIR393a,mdm-MIR393f,mdm-MIR393b,mdm-MIR393c,mdm-MIR393d,mdm-MIR393e,sbi-MIR393a,sbi-MIR393b,aly-M…	stu-MIR393	TCCAAAGGGATCGCATTGATCCtgtgtcccaaattaattaactggggtctatgggATCATGCGATCTCTTCGGAAT	stu-miR393-3p	ATCATGCGATCTCTTCGGAAT	3'	Diff	gp2a	..(((.((..((((((...(((.((((((((((((.(((((..(.................)..))))))))))))))))).)))...)))).....))..)).)))..	105	45.9	-46.5	0.9	7.5	13.5	11	4.5	9.5	5.5	7.95412	13.5439	10.5469	4.45144	9.13819	5.46543	middle
63	66	stu-miR393-5p_R-1_1ss21CT	TCCAAAGGGATCGCATTGATT	21	NW_015842762.1	-	5371	5442	tatTCCAAAGGGATCGCATTGATCctgtgtcccaatttgagtccaatgggATCATGCGATCTCTTCGGATTt	69	stu-MIR393,sly-MIR393,ptc-MIR393a,ptc-MIR393b,ptc-MIR393c,mtr-MIR393a,mtr-MIR393b,gma-MIR393c,gma-MIR393e,gma-MIR393a,gma-MIR393d,gma-MIR393f,gma-MIR393g,gma-MIR393i,gma-MIR393j,gma-MIR393h,gma-MIR393k,osa-MIR393a,osa-MIR393b,ath-MIR393a,ath-MIR393b,bdi-MIR393a,bdi-MIR393b,mdm-MIR393h,mdm-MIR393g,mdm-MIR393a,mdm-MIR393f,mdm-MIR393b,mdm-MIR393c,mdm-MIR393d,mdm-MIR393e,sbi-MIR393a,sbi-MIR393b,aly-M…	stu-MIR393	TCCAAAGGGATCGCATTGATCCtgtgtcccaaattaattaactggggtctatgggATCATGCGATCTCTTCGGAAT	stu-miR393-5p	TCCAAAGGGATCGCATTGATCC	5'	Diff	gp2a	...(((.((((((((((((.(((((..(.................)..))))))))))))))))).)))...	66	44.4	-31.3	1	29.5	21	23	8	24.5	32.5	31.2862	21.0683	22.0527	7.91367	23.5669	32.2957	middle
63	65	stu-miR393-3p_1ss20AT	ATCATGCGATCTCTTCGGATT	21	NW_015842762.1	-	5371	5442	tatTCCAAAGGGATCGCATTGATCctgtgtcccaatttgagtccaatgggATCATGCGATCTCTTCGGATTt	69	stu-MIR393,sly-MIR393,ptc-MIR393a,ptc-MIR393b,ptc-MIR393c,mtr-MIR393a,mtr-MIR393b,gma-MIR393c,gma-MIR393e,gma-MIR393a,gma-MIR393d,gma-MIR393f,gma-MIR393g,gma-MIR393i,gma-MIR393j,gma-MIR393h,gma-MIR393k,osa-MIR393a,osa-MIR393b,ath-MIR393a,ath-MIR393b,bdi-MIR393a,bdi-MIR393b,mdm-MIR393h,mdm-MIR393g,mdm-MIR393a,mdm-MIR393f,mdm-MIR393b,mdm-MIR393c,mdm-MIR393d,mdm-MIR393e,sbi-MIR393a,sbi-MIR393b,aly-M…	stu-MIR393	TCCAAAGGGATCGCATTGATCCtgtgtcccaaattaattaactggggtctatgggATCATGCGATCTCTTCGGAAT	stu-miR393-3p	ATCATGCGATCTCTTCGGAAT	3'	Diff	gp2a	...(((.((((((((((((.(((((..(.................)..))))))))))))))))).)))...	66	44.4	-31.3	1	7.5	13.5	11	4.5	9.5	5.5	7.95412	13.5439	10.5469	4.45144	9.13819	5.46543	middle
64	67	ptc-miR393a-5p_1ss21CT	TCCAAAGGGATCGCATTGATT	21	NW_015852114.1	-	143257	143374	actgaaggaggcgTCCAAAGGGATCGCATTGATCccatttcatttgtgtttctatttctttcaagaaattaaaatactgagtttggATCATGCTATCCCTTTGGACTcatcctttgga	69	sly-MIR393,ptc-MIR393c,ptc-MIR393a,ptc-MIR393b,mtr-MIR393a,mtr-MIR393b,gma-MIR393a,gma-MIR393d,gma-MIR393f,gma-MIR393g,gma-MIR393b,gma-MIR393i,gma-MIR393j,gma-MIR393h,gma-MIR393k,gma-MIR393c,gma-MIR393e,osa-MIR393a,osa-MIR393b,ath-MIR393b,ath-MIR393a,bdi-MIR393a,bdi-MIR393b,mdm-MIR393h,mdm-MIR393g,mdm-MIR393a,mdm-MIR393f,mdm-MIR393b,mdm-MIR393c,mdm-MIR393d,mdm-MIR393e,sbi-MIR393a,sbi-MIR393b,aly-…	ptc-MIR393b	agaggaggcaTCCAAAGGGATCGCATTGATCccgagtgtccctggccataattttggATCATGCTATCCCTTTGGATTcctcct	ptc-miR393a-5p	TCCAAAGGGATCGCATTGATC	5'	Diff	gp2a	.(..(((((...((((((((((((.((((.(((((...((((...((((((..((((((....))))))..))))))))))...))))))))).))))))))))))...)))))..).	116	39	-55.1	1.2	29.5	21	23	8	24.5	32.5	31.2862	21.0683	22.0527	7.91367	23.5669	32.2957	middle
64	68	ptc-miR393a-3p_2ss7CT20TC	ATCATGTTATCCCTTTGGACT	21	NW_015852114.1	-	143257	143374	actgaaggaggcgTCCAAAGGGATCGCATTGATCccatttcatttgtgtttctatttctttcaagaaattaaaatactgagtttggATCATGCTATCCCTTTGGACTcatcctttgga	69	sly-MIR393,ptc-MIR393c,ptc-MIR393a,ptc-MIR393b,mtr-MIR393a,mtr-MIR393b,gma-MIR393a,gma-MIR393d,gma-MIR393f,gma-MIR393g,gma-MIR393b,gma-MIR393i,gma-MIR393j,gma-MIR393h,gma-MIR393k,gma-MIR393c,gma-MIR393e,osa-MIR393a,osa-MIR393b,ath-MIR393b,ath-MIR393a,bdi-MIR393a,bdi-MIR393b,mdm-MIR393h,mdm-MIR393g,mdm-MIR393a,mdm-MIR393f,mdm-MIR393b,mdm-MIR393c,mdm-MIR393d,mdm-MIR393e,sbi-MIR393a,sbi-MIR393b,aly-…	ptc-MIR393b	agaggaggcaTCCAAAGGGATCGCATTGATCccgagtgtccctggccataattttggATCATGCTATCCCTTTGGATTcctcct	ptc-miR393a-3p	ATCATGCTATCCCTTTGGATT	3'	Diff	gp2a	.(..(((((...((((((((((((.((((.(((((...((((...((((((..((((((....))))))..))))))))))...))))))))).))))))))))))...)))))..).	116	39	-55.1	1.2	44.5	54	116	60	68.5	61	47.1944	54.1756	111.222	59.3525	65.8912	60.6165	middle
65	69	gma-miR394a-5p_L+3	AATTTGGCATTCTGTCCACCTCC	23	NW_015798126.1	+	6257	6342	tcagtagagccATTTTGGCATTCTGTCCACCTCCatccatatctttcaatgaggagggggccagagtgccaaactagctctacaaa	5	gma-MIR394g,gma-MIR394c,ppe-MIR394b,ghr-MIR394b,tcc-MIR394b,	gma-MIR394c	cagagtttcTTGGCATTCTGTCCACCTCCacttccactttcagttccatggatctctctctctttttggccctatctacgtactcggaggtggacatactgccaatagag	gma-miR394a-5p	TTGGCATTCTGTCCACCTCC	5'	Diff	gp2a	...(((((((...(((((((((((((((.(((((...(((........))).)))))))).))))))))))))...)))))))...	80	47.7	-43.3	1.1	7	10	0	6	15	26	7.42384	10.0325	0	5.93525	14.4287	25.8366	middle
66	70	sly-miR396a-5p_1ss21GA	TTCCACAGCTTTCTTGAACTA	21	NW_015869150.1	-	29985	30142	atatggctctctttgtatttTTCCACAGCTTTCTTGAACTGcatatatattagaaaattcacaccatatataaccaattatcattattggaggtgaaaataaaaaaaaaaattgttgcggTTCAATAAAGTTGTGGGAAGatacagatagtgtcaaga	62	sly-MIR396a,ptc-MIR396f,ptc-MIR396b,ptc-MIR396a,mtr-MIR396c,mtr-MIR396b,gma-MIR396e,gma-MIR396h,gma-MIR396i,gma-MIR396a,osa-MIR396b,osa-MIR396a,ath-MIR396a,bdi-MIR396c,bdi-MIR396d,mdm-MIR396d,mdm-MIR396e,mdm-MIR396c,mdm-MIR396g,mdm-MIR396f,mdm-MIR396b,mdm-MIR396a,lja-MIR396,sbi-MIR396a,sbi-MIR396b,aly-MIR396a,ppe-MIR396b,mes-MIR396a,mes-MIR396b,zma-MIR396a,zma-MIR396b,vvi-MIR396a,vvi-MIR396c,vvi-…	sly-MIR396a	tgattctttgtgtacttTTCCACAGCTTTCTTGAACTGcatacatataacaaaaaaatctgatttttttttgatttttttttacttttataaagaaaaaatttagatggaaagaattaaattgttgcgGTTCAATAAAGCTGTGGGAAGatacatataggatca	sly-miR396a-5p	TTCCACAGCTTTCTTGAACTG	5'	Diff	gp2a	...((((.((.(((((((((((((((((((((.((((((((((.........((....)).((((........(((((.......))))).))))....................)))))))))).))))))))))))))))))))).)).))))...	152	29.7	-53.9	1.1	52	38	56.5	60.5	66	53	55.1486	38.1236	54.1729	59.8471	63.4864	52.6668	middle
66	71	sly-miR396a-3p_L-1_1ss12CT	TTCAATAAAGTTGTGGGAAG	20	NW_015869150.1	-	29985	30142	atatggctctctttgtatttTTCCACAGCTTTCTTGAACTGcatatatattagaaaattcacaccatatataaccaattatcattattggaggtgaaaataaaaaaaaaaattgttgcggTTCAATAAAGTTGTGGGAAGatacagatagtgtcaaga	62	sly-MIR396a,ptc-MIR396f,ptc-MIR396b,ptc-MIR396a,mtr-MIR396c,mtr-MIR396b,gma-MIR396e,gma-MIR396h,gma-MIR396i,gma-MIR396a,osa-MIR396b,osa-MIR396a,ath-MIR396a,bdi-MIR396c,bdi-MIR396d,mdm-MIR396d,mdm-MIR396e,mdm-MIR396c,mdm-MIR396g,mdm-MIR396f,mdm-MIR396b,mdm-MIR396a,lja-MIR396,sbi-MIR396a,sbi-MIR396b,aly-MIR396a,ppe-MIR396b,mes-MIR396a,mes-MIR396b,zma-MIR396a,zma-MIR396b,vvi-MIR396a,vvi-MIR396c,vvi-…	sly-MIR396a	tgattctttgtgtacttTTCCACAGCTTTCTTGAACTGcatacatataacaaaaaaatctgatttttttttgatttttttttacttttataaagaaaaaatttagatggaaagaattaaattgttgcgGTTCAATAAAGCTGTGGGAAGatacatataggatca	sly-miR396a-3p	GTTCAATAAAGCTGTGGGAAG	3'	Diff	gp2a	...((((.((.(((((((((((((((((((((.((((((((((.........((....)).((((........(((((.......))))).))))....................)))))))))).))))))))))))))))))))).)).))))...	152	29.7	-53.9	1.1	156.5	210.5	157	132.5	182.5	123	165.976	211.184	150.534	131.07	175.549	122.227	middle
67	72	sly-MIR396a-p5_1ss3GT	TTTTGTACTTTTCCACAGCTT	21	NW_015929585.1	+	28920	29070	caaatgactctTTTTGTACTTTTCCACAGCTTtcttgaactgcatctgtcaaaaaaactcaactcatcaacactatttttctattttggagatgaagagaaattgtttgcagTTCAATAAAGCTGTGGGAAGatacacatagggtcataaa	35	sly-MIR396a,ptc-MIR396b,ptc-MIR396a,mtr-MIR396b,gma-MIR396i,gma-MIR396a,ath-MIR396b,ath-MIR396a,mdm-MIR396b,mdm-MIR396a,lja-MIR396,aly-MIR396a,mes-MIR396a,mes-MIR396b,vvi-MIR396d,csi-MIR396b,csi-MIR396c,csi-MIR396d,lus-MIR396c,lus-MIR396a,cme-MIR396e,cme-MIR396b,fve-MIR396c,fve-MIR396a,cas-MIR396a,cpa-MIR396,ghr-MIR396b,ghr-MIR396a,eun-MIR396a,hbr-MIR396b,aau-MIR396,bcy-MIR396a,bgy-MIR396a,amg-MI…	sly-MIR396a	tgattctttgtgtacttTTCCACAGCTTTCTTGAACTGcatacatataacaaaaaaatctgatttttttttgatttttttttacttttataaagaaaaaatttagatggaaagaattaaattgttgcgGTTCAATAAAGCTGTGGGAAGatacatataggatca	sly-MIR396a-p5	ttgtgtacttTTCCACAGCTT	5'	New	gp2a	...((((((((...((((..(((((((((((((.((((((((((.....(((.....(((...(((((..((..((......))..))..))))).)))...)))..)))))))))).)))))))))))))..))))...))))))))...	145	33.8	-57.5	1.1	19	12	28	20	20.5	12.5	20.1504	12.039	26.8468	19.7842	19.7193	12.4214	middle
67	71	sly-miR396a-3p_L-1_1ss12CT	TTCAATAAAGTTGTGGGAAG	20	NW_015929585.1	+	28920	29070	caaatgactctTTTTGTACTTTTCCACAGCTTtcttgaactgcatctgtcaaaaaaactcaactcatcaacactatttttctattttggagatgaagagaaattgtttgcagTTCAATAAAGCTGTGGGAAGatacacatagggtcataaa	35	sly-MIR396a,ptc-MIR396b,ptc-MIR396a,mtr-MIR396b,gma-MIR396i,gma-MIR396a,ath-MIR396b,ath-MIR396a,mdm-MIR396b,mdm-MIR396a,lja-MIR396,aly-MIR396a,mes-MIR396a,mes-MIR396b,vvi-MIR396d,csi-MIR396b,csi-MIR396c,csi-MIR396d,lus-MIR396c,lus-MIR396a,cme-MIR396e,cme-MIR396b,fve-MIR396c,fve-MIR396a,cas-MIR396a,cpa-MIR396,ghr-MIR396b,ghr-MIR396a,eun-MIR396a,hbr-MIR396b,aau-MIR396,bcy-MIR396a,bgy-MIR396a,amg-MI…	sly-MIR396a	tgattctttgtgtacttTTCCACAGCTTTCTTGAACTGcatacatataacaaaaaaatctgatttttttttgatttttttttacttttataaagaaaaaatttagatggaaagaattaaattgttgcgGTTCAATAAAGCTGTGGGAAGatacatataggatca	sly-miR396a-3p	GTTCAATAAAGCTGTGGGAAG	3'	Diff	gp2a	...((((((((...((((..(((((((((((((.((((((((((.....(((.....(((...(((((..((..((......))..))..))))).)))...)))..)))))))))).)))))))))))))..))))...))))))))...	145	33.8	-57.5	1.1	156.5	210.5	157	132.5	182.5	123	165.976	211.184	150.534	131.07	175.549	122.227	middle
68	73	ath-miR396b-5p_R+1	TTCCACAGCTTTCTTGAACTTT	22	NW_015901146.1	+	33792	33943	cttgaagtcctatcatgcttTTCCACAGCTTTCTTGAACTTCtttccctctgaattttcatctctagcaattgagttattgatatgagataagattaagctctgaaaGTTCAAGAAAGCTGTGGGAAAacatggtgaacttaggactttttt	21	ath-MIR396b,aly-MIR396b,mes-MIR396d,mes-MIR396e,mes-MIR396f,mes-MIR396c,lus-MIR396e,lus-MIR396b,cme-MIR396d,bra-MIR396,bna-MIR396a,cas-MIR396b,rco-MIR396,cca-MIR396a,cca-MIR396c,aqc-MIR396b,bcy-MIR396b,bgy-MIR396b,ama-MIR396,tcc-MIR396c,tcc-MIR396e,	ath-MIR396b	ggtcatacttTTCCACAGCTTTCTTGAACTTtctttttcatttccattgtttttttcttaaacaaaagtaagaagaaaaaaaactttaagattaagcattttggaaGCTCAAGAAAGCTGTGGGAAAacatgaca	ath-miR396b-5p	TTCCACAGCTTTCTTGAACTT	5'	Diff	gp2a	...((((((((((((((.(((((((((((((((((((((((.((.....((.((((((.(((((...((((......))))....))))))))))).))....))))))))))))))))))))))))).))))))......))))))))...	146	35.5	-60.5	1.1	138.5	160.5	169.5	148	137.5	128.5	146.886	161.022	162.519	146.403	132.263	127.692	middle
68	74	ath-miR396b-3p_2ss2CT20AG	GTTCAAGAAAGCTGTGGGAGA	21	NW_015901146.1	+	33792	33943	cttgaagtcctatcatgcttTTCCACAGCTTTCTTGAACTTCtttccctctgaattttcatctctagcaattgagttattgatatgagataagattaagctctgaaaGTTCAAGAAAGCTGTGGGAAAacatggtgaacttaggactttttt	21	ath-MIR396b,aly-MIR396b,mes-MIR396d,mes-MIR396e,mes-MIR396f,mes-MIR396c,lus-MIR396e,lus-MIR396b,cme-MIR396d,bra-MIR396,bna-MIR396a,cas-MIR396b,rco-MIR396,cca-MIR396a,cca-MIR396c,aqc-MIR396b,bcy-MIR396b,bgy-MIR396b,ama-MIR396,tcc-MIR396c,tcc-MIR396e,	ath-MIR396b	ggtcatacttTTCCACAGCTTTCTTGAACTTtctttttcatttccattgtttttttcttaaacaaaagtaagaagaaaaaaaactttaagattaagcattttggaaGCTCAAGAAAGCTGTGGGAAAacatgaca	ath-miR396b-3p	GCTCAAGAAAGCTGTGGGAAA	3'	Diff	gp2a	...((((((((((((((.(((((((((((((((((((((((.((.....((.((((((.(((((...((((......))))....))))))))))).))....))))))))))))))))))))))))).))))))......))))))))...	146	35.5	-60.5	1.1	4	2.5	0	4	3	0	4.2422	2.50813	0	3.95683	2.88574	0	low
69	75	ath-miR396b-5p_R+2_2	TTCCACAGCTTTCTTGAACTTTT	23	NW_015921282.1	+	9982	10132	catgaagtcctatcatgcttTTCCACAGCTTTCTTGAACTTCTtttcttctgattttcatctctagcaattgagttattgatatgagatgagattaagctataaaaGTTCAAGAAAGCTGTGGGAAAacatggtgaatttaggactttttt	22	ath-MIR396b,aly-MIR396b,mes-MIR396d,mes-MIR396e,mes-MIR396f,mes-MIR396c,lus-MIR396b,lus-MIR396e,cme-MIR396a,cme-MIR396d,bra-MIR396,bna-MIR396a,cas-MIR396b,rco-MIR396,cca-MIR396a,cca-MIR396c,aqc-MIR396b,bcy-MIR396b,bgy-MIR396b,ama-MIR396,tcc-MIR396e,tcc-MIR396c,	ath-MIR396b	ggtcatacttTTCCACAGCTTTCTTGAACTTtctttttcatttccattgtttttttcttaaacaaaagtaagaagaaaaaaaactttaagattaagcattttggaaGCTCAAGAAAGCTGTGGGAAAacatgaca	ath-miR396b-5p	TTCCACAGCTTTCTTGAACTT	5'	Diff	gp2a	...((((((((((((((.(((((((((((((((((((((((........((...(((((((((...((((......))))....)))))))))...))......))))))))))))))))))))))).))))))......))))))))...	145	33.1	-64.6	1.3	52	43.5	64.5	66	39.5	43	55.1486	43.6414	61.8434	65.2877	37.9956	42.7297	middle
69	74	ath-miR396b-3p_2ss2CT20AG	GTTCAAGAAAGCTGTGGGAGA	21	NW_015921282.1	+	9982	10132	catgaagtcctatcatgcttTTCCACAGCTTTCTTGAACTTCTtttcttctgattttcatctctagcaattgagttattgatatgagatgagattaagctataaaaGTTCAAGAAAGCTGTGGGAAAacatggtgaatttaggactttttt	22	ath-MIR396b,aly-MIR396b,mes-MIR396d,mes-MIR396e,mes-MIR396f,mes-MIR396c,lus-MIR396b,lus-MIR396e,cme-MIR396a,cme-MIR396d,bra-MIR396,bna-MIR396a,cas-MIR396b,rco-MIR396,cca-MIR396a,cca-MIR396c,aqc-MIR396b,bcy-MIR396b,bgy-MIR396b,ama-MIR396,tcc-MIR396e,tcc-MIR396c,	ath-MIR396b	ggtcatacttTTCCACAGCTTTCTTGAACTTtctttttcatttccattgtttttttcttaaacaaaagtaagaagaaaaaaaactttaagattaagcattttggaaGCTCAAGAAAGCTGTGGGAAAacatgaca	ath-miR396b-3p	GCTCAAGAAAGCTGTGGGAAA	3'	Diff	gp2a	...((((((((((((((.(((((((((((((((((((((((........((...(((((((((...((((......))))....)))))))))...))......))))))))))))))))))))))).))))))......))))))))...	145	33.1	-64.6	1.3	4	2.5	0	4	3	0	4.2422	2.50813	0	3.95683	2.88574	0	low
70	76	sly-miR396b_R+1	TTCCACAGCTTTCTTGAACTTT	22	NW_015913800.1	+	267075	267216	ctagtcatgcttTTCCACAGCTTTCTTGAACTTCttctagctgaattttgatctctctttaggcaattgtgggtagttttaatttgagagatgagatttaaagctctgtaagtccaagaAAGCTGTGGGAAAAGATGACAag	22	sly-MIR396b,ptc-MIR396g,ath-MIR396b,aly-MIR396b,ppe-MIR396a,mes-MIR396d,mes-MIR396e,csi-MIR396e,lus-MIR396e,lus-MIR396b,cme-MIR396d,bra-MIR396,bna-MIR396a,cas-MIR396b,cca-MIR396a,cca-MIR396c,aqc-MIR396b,bcy-MIR396b,bgy-MIR396b,ama-MIR396,tcc-MIR396c,tcc-MIR396d,	sly-MIR396b	gatgaccaagtcctagtcatgcttTTCCACAGCTTTCTTGAACTTcttcttgctaaattttgatctctaaattgataattttgagatgagatttgaagctatgaaagtccaagaaagctgtgggaaaagatggcaagctttggacttatt	sly-miR396b	TTCCACAGCTTTCTTGAACTT	5'	Diff	gp2a	...(((((..((((((((((((((((((.((((.....(((((((((((.(((((((.......(((((....))))).......))))))))))))))..))))....)))).))))))))))))))))))..)))))...	136	37.3	-54.3	1	138.5	160.5	169.5	148	137.5	128.5	146.886	161.022	162.519	146.403	132.263	127.692	middle
70	77	sly-MIR396b-p3_1ss19GA	AAGCTGTGGGAAAAGATGACA	21	NW_015913800.1	+	267075	267216	ctagtcatgcttTTCCACAGCTTTCTTGAACTTCttctagctgaattttgatctctctttaggcaattgtgggtagttttaatttgagagatgagatttaaagctctgtaagtccaagaAAGCTGTGGGAAAAGATGACAag	22	sly-MIR396b,ptc-MIR396g,ath-MIR396b,aly-MIR396b,ppe-MIR396a,mes-MIR396d,mes-MIR396e,csi-MIR396e,lus-MIR396e,lus-MIR396b,cme-MIR396d,bra-MIR396,bna-MIR396a,cas-MIR396b,cca-MIR396a,cca-MIR396c,aqc-MIR396b,bcy-MIR396b,bgy-MIR396b,ama-MIR396,tcc-MIR396c,tcc-MIR396d,	sly-MIR396b	gatgaccaagtcctagtcatgcttTTCCACAGCTTTCTTGAACTTcttcttgctaaattttgatctctaaattgataattttgagatgagatttgaagctatgaaagtccaagaaagctgtgggaaaagatggcaagctttggacttatt	sly-MIR396b-p3	aagctgtgggaaaagatggca	3'	New	gp2a	...(((((..((((((((((((((((((.((((.....(((((((((((.(((((((.......(((((....))))).......))))))))))))))..))))....)))).))))))))))))))))))..)))))...	136	37.3	-54.3	1	20	15	10	6	11	10	21.211	15.0488	9.58813	5.93525	10.5811	9.93714	middle
71	78	sly-miR396a-5p_L+1	CTTCCACAGCTTTCTTGAACTG	22	NW_015913800.1	-	275073	275212	ctctttgtattTTTCCACAGCTTTCTTGAACTGcatatatttgaaaactcacaccatatataaccaattattattattggaggtgaaaataaaataaaaaattgttgcggttcaATAAGGCTGTGGGAAGATACAgatag	56	sly-MIR396a,ptc-MIR396b,ptc-MIR396a,mtr-MIR396b,gma-MIR396i,gma-MIR396e,gma-MIR396a,gma-MIR396h,gma-MIR396j,osa-MIR396b,osa-MIR396a,ath-MIR396a,bdi-MIR396c,bdi-MIR396d,mdm-MIR396c,mdm-MIR396b,mdm-MIR396d,mdm-MIR396e,mdm-MIR396a,lja-MIR396,sbi-MIR396b,sbi-MIR396a,aly-MIR396a,ppe-MIR396b,mes-MIR396a,mes-MIR396b,zma-MIR396a,zma-MIR396b,vvi-MIR396d,vvi-MIR396c,vvi-MIR396a,csi-MIR396a,csi-MIR396b,lus-…	sly-MIR396a	tgattctttgtgtacttTTCCACAGCTTTCTTGAACTGcatacatataacaaaaaaatctgatttttttttgatttttttttacttttataaagaaaaaatttagatggaaagaattaaattgttgcgGTTCAATAAAGCTGTGGGAAGatacatataggatca	sly-miR396a-5p	TTCCACAGCTTTCTTGAACTG	5'	Diff	gp2a	((.(((((((((((((((((((((.((((((((((...((((......((((.(((...((((.......))))...)))..))))............))))...)))))))))).))))))))))))))))))))).))	140	30.7	-50.2	1.2	160.5	131.5	205	217	240	374.5	170.218	131.928	196.557	214.658	230.86	372.146	middle
72	78	sly-miR396a-5p_L+1	CTTCCACAGCTTTCTTGAACTG	22	NW_015916318.1	-	12994	13142	aaaatgactctttttgtactTTTCCACAGCTTTCTTGAACTGcatctgtcaaaaaactcaactcatcaacactatttttcttttttggagatgaagagaaattgttgcgGTTCAATAAATCTGTGGGAAGatacacatagggttataaa	59	sly-MIR396a,ptc-MIR396b,ptc-MIR396a,ptc-MIR396f,mtr-MIR396b,mtr-MIR396c,gma-MIR396i,gma-MIR396e,gma-MIR396a,gma-MIR396h,gma-MIR396j,osa-MIR396b,osa-MIR396a,ath-MIR396b,ath-MIR396a,bdi-MIR396c,bdi-MIR396d,mdm-MIR396b,mdm-MIR396g,mdm-MIR396f,mdm-MIR396a,lja-MIR396,sbi-MIR396b,sbi-MIR396a,aly-MIR396a,mes-MIR396a,mes-MIR396b,zma-MIR396a,zma-MIR396b,vvi-MIR396d,vvi-MIR396c,csi-MIR396a,csi-MIR396b,csi-…	sly-MIR396a	tgattctttgtgtacttTTCCACAGCTTTCTTGAACTGcatacatataacaaaaaaatctgatttttttttgatttttttttacttttataaagaaaaaatttagatggaaagaattaaattgttgcgGTTCAATAAAGCTGTGGGAAGatacatataggatca	sly-miR396a-5p	TTCCACAGCTTTCTTGAACTG	5'	Diff	gp2a	...((((((((...((((..(((((((((.(((.((((((((((...((......)).............((.((((((((((.........)))))))))).)))))))))))).))).)))))))))..))))...))))))))...	143	32.9	-46.1	0.9	160.5	131.5	205	217	240	374.5	170.218	131.928	196.557	214.658	230.86	372.146	middle
72	80	sly-miR396a-3p_1ss11GT	GTTCAATAAATCTGTGGGAAG	21	NW_015916318.1	-	12994	13142	aaaatgactctttttgtactTTTCCACAGCTTTCTTGAACTGcatctgtcaaaaaactcaactcatcaacactatttttcttttttggagatgaagagaaattgttgcgGTTCAATAAATCTGTGGGAAGatacacatagggttataaa	59	sly-MIR396a,ptc-MIR396b,ptc-MIR396a,ptc-MIR396f,mtr-MIR396b,mtr-MIR396c,gma-MIR396i,gma-MIR396e,gma-MIR396a,gma-MIR396h,gma-MIR396j,osa-MIR396b,osa-MIR396a,ath-MIR396b,ath-MIR396a,bdi-MIR396c,bdi-MIR396d,mdm-MIR396b,mdm-MIR396g,mdm-MIR396f,mdm-MIR396a,lja-MIR396,sbi-MIR396b,sbi-MIR396a,aly-MIR396a,mes-MIR396a,mes-MIR396b,zma-MIR396a,zma-MIR396b,vvi-MIR396d,vvi-MIR396c,csi-MIR396a,csi-MIR396b,csi-…	sly-MIR396a	tgattctttgtgtacttTTCCACAGCTTTCTTGAACTGcatacatataacaaaaaaatctgatttttttttgatttttttttacttttataaagaaaaaatttagatggaaagaattaaattgttgcgGTTCAATAAAGCTGTGGGAAGatacatataggatca	sly-miR396a-3p	GTTCAATAAAGCTGTGGGAAG	3'	Diff	gp2a	...((((((((...((((..(((((((((.(((.((((((((((...((......)).............((.((((((((((.........)))))))))).)))))))))))).))).)))))))))..))))...))))))))...	143	32.9	-46.1	0.9	27.5	44.5	30	23	30	23	29.1651	44.6447	28.7644	22.7518	28.8574	22.8554	middle
73	81	sly-miR396b_R+2	TTCCACAGCTTTCTTGAACTTTT	23	NW_015869150.1	+	21936	22099	gatgaagtcctagtcatgcttTTCCACAGCTTTCTTGAACTTCTtctagctgaattttgatctctctttaggcaattgtggatagttttaatttgagagatgagatttaaagctctgaaagtccaagaaagctgtgggaaaatatggcaatcttaggacttttt	8	sly-MIR396b,ptc-MIR396g,ppe-MIR396a,csi-MIR396e,cme-MIR396a,cas-MIR396b,aqc-MIR396b,tcc-MIR396d,	sly-MIR396b	gatgaccaagtcctagtcatgcttTTCCACAGCTTTCTTGAACTTcttcttgctaaattttgatctctaaattgataattttgagatgagatttgaagctatgaaagtccaagaaagctgtgggaaaagatggcaagctttggacttatt	sly-miR396b	TTCCACAGCTTTCTTGAACTT	5'	Diff	gp2a	...((((((((((((((..((((((((((((((((((.((((..((.(((((((((((.(((((((.......(((((....))))).......))))))))))))))..))))..)))))).))))))))))))))))))..))))).....)))))))))..	159	36	-64.7	1.1	52	43.5	64.5	66	39.5	43	55.1486	43.6414	61.8434	65.2877	37.9956	42.7297	middle
74	82	ath-miR396b-5p_R+2_1	TTCCACAGCTTTCTTGAACTTTC	23	NW_015901146.1	-	33877	34019	cctaagttcaccatgtttTCCCACAGCTTTCTTGAACTTTCagagcttaatcttatctcatatcaataactcaattgctagagatgaaaattcagagggaaagaagttcaagaaagctgtggaaaagcatgataggacttcaa	13	ath-MIR396b,aly-MIR396b,mes-MIR396d,mes-MIR396e,lus-MIR396e,lus-MIR396b,cme-MIR396d,bra-MIR396,bna-MIR396a,bcy-MIR396b,bgy-MIR396b,ama-MIR396,tcc-MIR396c,	ath-MIR396b	ggtcatacttTTCCACAGCTTTCTTGAACTTtctttttcatttccattgtttttttcttaaacaaaagtaagaagaaaaaaaactttaagattaagcattttggaaGCTCAAGAAAGCTGTGGGAAAacatgaca	ath-miR396b-5p	TTCCACAGCTTTCTTGAACTT	5'	Diff	gp2a	...((((((..((((((((.((((((((((((((((((((.....((.(((.(((((((.((.((((......)))).)))))))))..))).)).......)))))))))))))))))))).))))))))...))))))...	137	36.4	-54.5	1	7	0	8	15	6	13	7.42384	0	7.6705	14.8381	5.77149	12.9183	middle
75	83	ptc-miR397a_L-2R+2	ATTGAGTGCAGCGTTGATGAA	21	NW_015805777.1	-	6551	6688	atgcagaacacttagaaatatgATTGAGTGCAGCGTTGATGAAaatgtcgagtttctgccgatcctgatgctgcattattattcagttgagacagttttcatctacgttgtactcaatcatgtttcagtgctctgaag	23	ptc-MIR397a,ptc-MIR397b,mtr-MIR397,gma-MIR397a,gma-MIR397b,osa-MIR397a,osa-MIR397b,bdi-MIR397a,bdi-MIR397b,mdm-MIR397a,mdm-MIR397b,lja-MIR397,ppe-MIR397,mes-MIR397b,vvi-MIR397a,csi-MIR397,lus-MIR397b,lus-MIR397a,tae-MIR397,fve-MIR397,rco-MIR397,eun-MIR397a,tcc-MIR397,	ptc-MIR397a	tggagaaccaTCATTGAGTGCAGCGTTGATGaaatcctccattttgtgctattaaactgttaccaaccctttatggggcatggcatcatttcaccagcgctgcattcaatcatgtttttc	ptc-miR397a	TCATTGAGTGCAGCGTTGATG	5'	Diff	gp2a	...((((.((((..((((((((((((((((((((((.((((((((((((.((..((....))..))...((((.((....)).))))...)))).)))))))).)))))))))))))))))))))))))).))))...	132	39.1	-59.5	1.1	95	86.5	70	57	71	73	100.752	86.7813	67.1169	56.3849	68.2959	72.5411	middle
76	83	ptc-miR397a_L-2R+2	ATTGAGTGCAGCGTTGATGAA	21	NW_015946810.1	+	44491	44668	agctaggaaggagtagctatgcagagtgcttagaaatatcATTGAGTGCAGCGTTGATGAAaatgtcgaatttctgcagatactgatgctgcattattattcatttcagacagttttcatctacgctgcactcaatcatgtttcagcgctctgaagaaatagttagtttaccctaaac	23	ptc-MIR397a,ptc-MIR397b,mtr-MIR397,gma-MIR397a,gma-MIR397b,osa-MIR397a,osa-MIR397b,bdi-MIR397a,bdi-MIR397b,mdm-MIR397a,mdm-MIR397b,lja-MIR397,ppe-MIR397,mes-MIR397b,vvi-MIR397a,csi-MIR397,lus-MIR397b,lus-MIR397a,tae-MIR397,fve-MIR397,rco-MIR397,eun-MIR397a,tcc-MIR397,	ptc-MIR397a	tggagaaccaTCATTGAGTGCAGCGTTGATGaaatcctccattttgtgctattaaactgttaccaaccctttatggggcatggcatcatttcaccagcgctgcattcaatcatgtttttc	ptc-miR397a	TCATTGAGTGCAGCGTTGATG	5'	Diff	gp2a	...((((...((.(((((((.(((((((((..(((((((.((((((((((((((.((((((((((((((((...(((((.........))))).....))))......)))).)))))))).)))))))))))))).)))))))))))))))).....))))))).))...))))...	172	38.8	-73.9	1.1	95	86.5	70	57	71	73	100.752	86.7813	67.1169	56.3849	68.2959	72.5411	middle
77	84	stu-miR398a-3p_1ss21GT	TATGTTCTCAGGTCGCCCCTT	21	NW_015848535.1	-	2246	2370	aatcaacatggttacttccctgaggggtgtgcttgagaacacaggcgcatctggcttttgattaggctaatctatgtgcactTATGTTCTCAGGTCACCCCTTtgggatctcctctgtgttgcta	22	stu-MIR398a,sly-MIR398a,ptc-MIR398a,mtr-MIR398a,gma-MIR398b,gma-MIR398a,osa-MIR398a,ath-MIR398a,bdi-MIR398b,mdm-MIR398a,lja-MIR398,gra-MIR398,aly-MIR398a,vvi-MIR398a,csi-MIR398a,cme-MIR398b,cas-MIR398b,ghr-MIR398,rco-MIR398a,aqc-MIR398a,ahy-MIR398,bol-MIR398a,	stu-MIR398a	GGGTTGATTTGAGAACATATGtatgggcatattttgtttctaacaatttattgtttataaatgtgacacaTATGTTCTCAGGTCGCCCCTG	stu-miR398a-3p	TATGTTCTCAGGTCGCCCCTG	3'	Diff	gp2a	...(((((..(.....((((..(((((((.(((((((((((.((((((((.((((((......))))))....)))))).))..))))))))))))))))))..))))......)..)))))...	119	47.2	-58.7	1	4	2.5	0	0	6	3	4.2422	2.50813	0	0	5.77149	2.98114	low
78	85	stu-miR398a-3p	TATGTTCTCAGGTCGCCCCTG	21	NW_015902319.1	+	28380	28536	agtgtcttatataaataggtggaagtgttcaataggggcaacctaagatcatatgtatgacgttttttttattttaataatttttgtaattgtgatacaTATGTTCTCAGGTCGCCCCTGttgaactattttccatcatttgattgaataagatttt	3	stu-MIR398a,sly-MIR398a,bdi-MIR398a,	stu-MIR398a	GGGTTGATTTGAGAACATATGtatgggcatattttgtttctaacaatttattgtttataaatgtgacacaTATGTTCTCAGGTCGCCCCTG	stu-miR398a-3p	TATGTTCTCAGGTCGCCCCTG	3'	Yes	gp2a	...(((((((.(((((.((((((((.(((((((((((((.((((.(((.(((((((((.(((........(((.....))).........))).))))))))).))).)))).)))))))))))))...))))))))))))).....)))))))...	151	29.9	-59.3	1.3	212.5	169	163	78	146.5	172	225.367	169.55	156.286	77.1582	140.92	170.919	middle
79	85	stu-miR398a-3p	TATGTTCTCAGGTCGCCCCTG	21	NW_015940604.1	+	1115	1233	ataggtggaaatgttcaacgggggcaacctgagatcatgtgtacgacattttttgtttttgataattttagtaatacaTATGTTCTCAGGTCGCCCCTGtagaactattttccatcgta	2	stu-MIR398a,sly-MIR398a,	stu-MIR398a	GGGTTGATTTGAGAACATATGtatgggcatattttgtttctaacaatttattgtttataaatgtgacacaTATGTTCTCAGGTCGCCCCTG	stu-miR398a-3p	TATGTTCTCAGGTCGCCCCTG	3'	Yes	gp2a	...((((((((.((((.((((((((.((((((((.((((((((..((.....(((((...))))).....))..)))))))).)))))))).)))))))).))))...))))))))...	113	37.8	-56.5	1.3	212.5	169	163	78	146.5	172	225.367	169.55	156.286	77.1582	140.92	170.919	middle
80	86	mtr-miR399l	TGCCAAAGGAGAGTTGCCCTG	21	NW_015856591.1	+	20261	20393	aaataagggaaacagtgataaggctactctctattggcatgcaactttttttgtggctccatactgctgcttgatcacatatttgagctgacaTGCCAAAGGAGAGTTGCCCTGttactgtctctgcttaatc	30	mtr-MIR399l,mtr-MIR399p,gma-MIR399b,gma-MIR399c,gma-MIR399a,gma-MIR399h,osa-MIR399d,ath-MIR399c,ath-MIR399b,mdm-MIR399i,mdm-MIR399j,gra-MIR399,sbi-MIR399i,sbi-MIR399d,aly-MIR399c,aly-MIR399b,mes-MIR399f,zma-MIR399e,zma-MIR399j,zma-MIR399i,vvi-MIR399c,vvi-MIR399b,csi-MIR399d,fve-MIR399a,aof-MIR399a,cas-MIR399a,rco-MIR399a,vun-MIR399a,pvu-MIR399a,tcc-MIR399i,	mtr-MIR399l	aacaatagggcacctctctcctggcaagtaaaaagggctcagtgccaataactTGCCAAAGGAGAGTTGCCCTGtggct	mtr-miR399l	TGCCAAAGGAGAGTTGCCCTG	3'	Yes	gp2a	...(((((((.(((((((((.(((.((((((..(((((((((.........((((....)))).....(((..(........)..))).).))))))))..)))))).))).))))))))).))).))))...	127	42.1	-52.6	0.9	0	3.5	3	0	3	0	0	3.51138	2.87644	0	2.88574	0	low
81	86	mtr-miR399l	TGCCAAAGGAGAGTTGCCCTG	21	NW_015888468.1	+	514	637	tcataagcgaaaaagtaatagggttactctttattggcatgcaataatttagtgactctgtttgatcataaatatcagctgacgTGCCAAAGGAGAGTTGCCCTGttactgcctctgcttaata	30	mtr-MIR399l,mtr-MIR399p,gma-MIR399b,gma-MIR399a,gma-MIR399h,gma-MIR399c,osa-MIR399d,ath-MIR399c,ath-MIR399b,mdm-MIR399i,mdm-MIR399j,gra-MIR399,sbi-MIR399d,sbi-MIR399i,aly-MIR399c,aly-MIR399b,mes-MIR399f,zma-MIR399j,zma-MIR399e,zma-MIR399i,vvi-MIR399c,vvi-MIR399b,csi-MIR399d,fve-MIR399a,aof-MIR399a,cas-MIR399a,rco-MIR399a,vun-MIR399a,pvu-MIR399a,tcc-MIR399i,	mtr-MIR399l	aacaatagggcacctctctcctggcaagtaaaaagggctcagtgccaataactTGCCAAAGGAGAGTTGCCCTGtggct	mtr-miR399l	TGCCAAAGGAGAGTTGCCCTG	3'	Yes	gp2a	...(((((((...((((((((((..((((((..((((((((((...(((((.(((.((.....))))))))))......)).))))))))..))))))..))))))))))...)).)))))...	118	37.9	-46.6	1	0	3.5	3	0	3	0	0	3.51138	2.87644	0	2.88574	0	low
82	87	sly-miR403-5p_1ss18AG	CGTTTGTGCGTGAATCTGACA	21	NW_015888232.1	-	54782	54903	gaaagaggcatatttcaCGTTTGTGCGTGAATCTGACAacccttttttcatcattaaatctatttttatctcatgggttgtgtttgTTAGATTCACGCACAAACTCGcaatatgtcttttcc	37	sly-MIR403,ptc-MIR403b,ptc-MIR403c,ptc-MIR403a,ptc-MIR403d,gma-MIR403b,gma-MIR403a,ath-MIR403,mdm-MIR403a,mdm-MIR403b,aly-MIR403a,aly-MIR403b,ppe-MIR403,mes-MIR403b,mes-MIR403a,vvi-MIR403b,vvi-MIR403c,vvi-MIR403f,vvi-MIR403d,vvi-MIR403a,vvi-MIR403e,csi-MIR403b,csi-MIR403a,bra-MIR403,bna-MIR403,cas-MIR403,rco-MIR403a,rco-MIR403b,htu-MIR403b,htu-MIR403e,htu-MIR403c,htu-MIR403a,htu-MIR403d,har-MIR40…	sly-MIR403	agaaattgaaaatcaggaagaggcatatttcaCGTTTGTGCGTGAATCTAACAactcttttcatctgaaaaactgttattgtttgCTAGATTCACGCACAAGCTCGtaatatggcttttccaatctctgcgctttgatttct	sly-miR403-5p	CGTTTGTGCGTGAATCTAACA	5'	Diff	gp2a	..((((((((((((....((((((((((((((((((((((((................................))))......))))))))))))))))))))....))))))))))))..	118	36.1	-46.231	1	7077.5	6045	6626	6337	5471.5	5525.5	7506.04	6064.66	6353.09	6268.61	5263.12	5490.77	high
82	88	sly-miR403-3p_2ss1CT17GA	TTAGATTCACGCACAAACTCG	21	NW_015888232.1	-	54782	54903	gaaagaggcatatttcaCGTTTGTGCGTGAATCTGACAacccttttttcatcattaaatctatttttatctcatgggttgtgtttgTTAGATTCACGCACAAACTCGcaatatgtcttttcc	37	sly-MIR403,ptc-MIR403b,ptc-MIR403c,ptc-MIR403a,ptc-MIR403d,gma-MIR403b,gma-MIR403a,ath-MIR403,mdm-MIR403a,mdm-MIR403b,aly-MIR403a,aly-MIR403b,ppe-MIR403,mes-MIR403b,mes-MIR403a,vvi-MIR403b,vvi-MIR403c,vvi-MIR403f,vvi-MIR403d,vvi-MIR403a,vvi-MIR403e,csi-MIR403b,csi-MIR403a,bra-MIR403,bna-MIR403,cas-MIR403,rco-MIR403a,rco-MIR403b,htu-MIR403b,htu-MIR403e,htu-MIR403c,htu-MIR403a,htu-MIR403d,har-MIR40…	sly-MIR403	agaaattgaaaatcaggaagaggcatatttcaCGTTTGTGCGTGAATCTAACAactcttttcatctgaaaaactgttattgtttgCTAGATTCACGCACAAGCTCGtaatatggcttttccaatctctgcgctttgatttct	sly-miR403-3p	CTAGATTCACGCACAAGCTCG	3'	Diff	gp2a	..((((((((((((....((((((((((((((((((((((((................................))))......))))))))))))))))))))....))))))))))))..	118	36.1	-46.231	1	2057	2828	1659	1258.5	3043.5	1522	2181.55	2837.2	1590.67	1244.92	2927.59	1512.43	high
83	87	sly-miR403-5p_1ss18AG	CGTTTGTGCGTGAATCTGACA	21	NW_015903077.1	+	170016	170132	aagaggcgtatttcaCGTTTGTGCGTGAATCTGACAacccttttttatcattaaatctatttttatttcatgggttgtgtttgTTAGATTCACGCACAAACTCGtaatatgtctttt	37	sly-MIR403,ptc-MIR403b,ptc-MIR403c,ptc-MIR403a,ptc-MIR403d,gma-MIR403b,gma-MIR403a,ath-MIR403,mdm-MIR403a,mdm-MIR403b,aly-MIR403a,aly-MIR403b,ppe-MIR403,mes-MIR403b,mes-MIR403a,vvi-MIR403d,vvi-MIR403a,vvi-MIR403b,vvi-MIR403c,vvi-MIR403f,vvi-MIR403e,csi-MIR403b,csi-MIR403a,bra-MIR403,bna-MIR403,cas-MIR403,rco-MIR403a,rco-MIR403b,htu-MIR403b,htu-MIR403d,htu-MIR403e,htu-MIR403c,htu-MIR403a,har-MIR40…	sly-MIR403	agaaattgaaaatcaggaagaggcatatttcaCGTTTGTGCGTGAATCTAACAactcttttcatctgaaaaactgttattgtttgCTAGATTCACGCACAAGCTCGtaatatggcttttccaatctctgcgctttgatttct	sly-miR403-5p	CGTTTGTGCGTGAATCTAACA	5'	Diff	gp2a	((((((((((((....((((((((((((((((((((((((...............................))))......))))))))))))))))))))....))))))))))))	117	33.3	-45.865	1.2	7077.5	6045	6626	6337	5471.5	5525.5	7506.04	6064.66	6353.09	6268.61	5263.12	5490.77	high
83	88	sly-miR403-3p_2ss1CT17GA	TTAGATTCACGCACAAACTCG	21	NW_015903077.1	+	170016	170132	aagaggcgtatttcaCGTTTGTGCGTGAATCTGACAacccttttttatcattaaatctatttttatttcatgggttgtgtttgTTAGATTCACGCACAAACTCGtaatatgtctttt	37	sly-MIR403,ptc-MIR403b,ptc-MIR403c,ptc-MIR403a,ptc-MIR403d,gma-MIR403b,gma-MIR403a,ath-MIR403,mdm-MIR403a,mdm-MIR403b,aly-MIR403a,aly-MIR403b,ppe-MIR403,mes-MIR403b,mes-MIR403a,vvi-MIR403d,vvi-MIR403a,vvi-MIR403b,vvi-MIR403c,vvi-MIR403f,vvi-MIR403e,csi-MIR403b,csi-MIR403a,bra-MIR403,bna-MIR403,cas-MIR403,rco-MIR403a,rco-MIR403b,htu-MIR403b,htu-MIR403d,htu-MIR403e,htu-MIR403c,htu-MIR403a,har-MIR40…	sly-MIR403	agaaattgaaaatcaggaagaggcatatttcaCGTTTGTGCGTGAATCTAACAactcttttcatctgaaaaactgttattgtttgCTAGATTCACGCACAAGCTCGtaatatggcttttccaatctctgcgctttgatttct	sly-miR403-3p	CTAGATTCACGCACAAGCTCG	3'	Diff	gp2a	((((((((((((....((((((((((((((((((((((((...............................))))......))))))))))))))))))))....))))))))))))	117	33.3	-45.865	1.2	2057	2828	1659	1258.5	3043.5	1522	2181.55	2837.2	1590.67	1244.92	2927.59	1512.43	high
84	89	sly-miR403-5p_2ss1CT18AG	TGTTTGTGCGTGAATCTGACA	21	NW_015888232.1	+	70495	70634	gaaaagacacattacaTGTTTGTGCGTGAATCTAACAcgccccatgcatcatccaaaagaaagagctaaaaacaatttcaatgatgaaaaggatcatctgatgatagattcatgcacaaacaagaaatatgcctcttcct	2	sly-MIR403,htu-MIR403d,	sly-MIR403	agaaattgaaaatcaggaagaggcatatttcaCGTTTGTGCGTGAATCTAACAactcttttcatctgaaaaactgttattgtttgCTAGATTCACGCACAAGCTCGtaatatggcttttccaatctctgcgctttgatttct	sly-miR403-5p	CGTTTGTGCGTGAATCTAACA	5'	Diff	gp2a	(((.((.((.(((...((((((((((((((((((....((.....)).(((((.....((((.............))))...(((((......))))).)))))))))))))))))))))))...))).)).)).)))..	138	36.4	-38.1	0.7	5	7	4.5	3	2.5	2.5	5.30275	7.02276	4.31466	2.96762	2.40479	2.48428	low
85	89	sly-miR403-5p_2ss1CT18AG	TGTTTGTGCGTGAATCTGACA	21	NW_015903077.1	-	139368	139507	tttgaaaagacatattacaTGTTTGTGCGTGAATCTAACAcaccccatgcatcatccaaaagaaagagctaaaacaatttcaatgatgaaaagaatcatatgatagattcatgcacaaacatgaaatatgcctcttcctg	2	sly-MIR403,htu-MIR403d,	sly-MIR403	agaaattgaaaatcaggaagaggcatatttcaCGTTTGTGCGTGAATCTAACAactcttttcatctgaaaaactgttattgtttgCTAGATTCACGCACAAGCTCGtaatatggcttttccaatctctgcgctttgatttct	sly-miR403-5p	CGTTTGTGCGTGAATCTAACA	5'	Diff	gp2a	...(((.((.((((((.((((((((((((((((((((.((...........(((((.....((((............))))...)))))...........)).)))))))))))))))))))).)))))).)).)))...	134	33.6	-43.2	0.9	5	7	4.5	3	2.5	2.5	5.30275	7.02276	4.31466	2.96762	2.40479	2.48428	low
86	90	gma-miR403a_R-1	TTAGATTCACGCACAAACTT	20	NW_015888232.1	-	70404	70547	caggaagaggcatatttcttgtttgtgcatgaatctatcatcagatgatccttttcatcattgaaattgtttttagctctttcttttggatgatgcatggggcgtgTTAGATTCACGCACAAACATgtaatgtgtcttttcaaa	2	gma-MIR403b,gma-MIR403a,	gma-MIR403a	aaattgcaggttcgtgcgtgaatctaacgaaagtttctcgttctctccattccacttctgcgTTAGATTCACGCACAAACTTGtcattt	gma-miR403a	TTAGATTCACGCACAAACTTG	3'	Diff	gp2a	...(((((((((((((...(((((((((.(((((((((((((.(((((......)))))...((((..((.....))..)))).....))))).(((((...))))))))))))).)))))))))...)))))))))))))...	138	36.1	-53.3	1	22	15.5	8	8	24	6	23.3321	15.5504	7.6705	7.91367	23.086	5.96228	middle
87	91	ptc-miR403a_R-3	TTAGATTCACGCACAAAC	18	NW_015903077.1	+	139287	139426	caggaagaggcatatttcatgtttgtgcatgaatctatcatatgattcttttcatcattgaaattgttttagctctttcttttggatgatgcatggggtgtgTTAGATTCACGCACAAACatgtaatatgtcttttcaaa	36	ptc-MIR403b,ptc-MIR403c,ptc-MIR403a,ptc-MIR403d,gma-MIR403b,gma-MIR403a,ath-MIR403,mdm-MIR403a,mdm-MIR403b,aly-MIR403a,aly-MIR403b,ppe-MIR403,mes-MIR403b,mes-MIR403a,vvi-MIR403d,vvi-MIR403a,vvi-MIR403b,vvi-MIR403c,vvi-MIR403f,vvi-MIR403e,csi-MIR403b,csi-MIR403a,bra-MIR403,bna-MIR403,cas-MIR403,rco-MIR403a,rco-MIR403b,htu-MIR403b,htu-MIR403d,htu-MIR403e,htu-MIR403c,htu-MIR403a,har-MIR403a,hpe-MIR4…	ptc-MIR403a	aggcatatttcaggtttgtgcatgaatctaatatagctaaaaaaatcccatcaaacacaaattaaaatactagatagcaatcagcactagtttagtatagtaTTAGATTCACGCACAAACTCGtaatctgtc	ptc-miR403a	TTAGATTCACGCACAAACTCG	3'	Diff	gp2a	...(((((((((((((.(((((((((((.((((((((.(((((...(((...(((((((((((..((....))..)))).....)))))))...)))))))).)))))))).))))))))))).)))))))))))))...	134	33.6	-57.4	1.2	0	6	0	0	9	0	0	6.01951	0	0	8.65723	0	low
88	92	mdm-miR408b	ACAGGGAAGAGGTAGAGCATG	21	NW_015921398.1	+	53478	53573	gatggagaggatagACAGGGACGAGGTAGAGCATGagatgtgcaatttttgcttgcccattctaTGCACTGCCTCTTCCCTGGCTCtcctccctcg	26	ptc-MIR408,mtr-MIR408,gma-MIR408c,osa-MIR408,bdi-MIR408,mdm-MIR408a,mdm-MIR408c,mdm-MIR408b,mdm-MIR408d,sbi-MIR408,mes-MIR408,zma-MIR408a,zma-MIR408b,tae-MIR408,cme-MIR408,fve-MIR408,aof-MIR408,rco-MIR408,cca-MIR408,hbr-MIR408a,hbr-MIR408b,sof-MIR408a,sof-MIR408d,sof-MIR408c,sof-MIR408b,dpr-MIR408,	mdm-MIR408b	ACAGGGAAGAGGTAGAGCATGgatggagttctcaagagcaaaatagagctcttgtgactctactcatgcactgcctcttccctgg	mdm-miR408b	ACAGGGAAGAGGTAGAGCATG	5'	Yes	gp2a	((.((.(((((.((.((((((.(((((((.(((((..(((.((((.......)))).)))..))))).))))))).)))))).)).))))))))).	95	53.1	-51.8	1	6	9	11	10	0	0	6.36329	9.02926	10.5469	9.89208	0	0	middle
88	93	ptc-miR408-3p_L-1R+2	TGCACTGCCTCTTCCCTGGCTT	22	NW_015921398.1	+	53478	53573	gatggagaggatagACAGGGACGAGGTAGAGCATGagatgtgcaatttttgcttgcccattctaTGCACTGCCTCTTCCCTGGCTCtcctccctcg	26	ptc-MIR408,mtr-MIR408,gma-MIR408c,osa-MIR408,bdi-MIR408,mdm-MIR408a,mdm-MIR408c,mdm-MIR408b,mdm-MIR408d,sbi-MIR408,mes-MIR408,zma-MIR408a,zma-MIR408b,tae-MIR408,cme-MIR408,fve-MIR408,aof-MIR408,rco-MIR408,cca-MIR408,hbr-MIR408a,hbr-MIR408b,sof-MIR408a,sof-MIR408d,sof-MIR408c,sof-MIR408b,dpr-MIR408,	ptc-MIR408	agagacagatgaagaCGGGGAACAGGCAGAGCATGGatggagctactaacagaagtacttgttttggctctacccATGCACTGCCTCTTCCCTGGCttgtggctc	ptc-miR408-3p	ATGCACTGCCTCTTCCCTGGC	3'	Diff	gp2a	((.((.(((((.((.((((((.(((((((.(((((..(((.((((.......)))).)))..))))).))))))).)))))).)).))))))))).	95	53.1	-51.8	1	474	382	263	253	292	397	502.7	383.242	252.168	250.27	280.879	394.504	middle
89	94	osa-miR530-5p_R+1_1ss20AC_2	TGCATTTGCACCTGCACCTCT	21	NW_015891754.1	+	22221	22355	tgttgcctttatcTGCATTTGCACCTGCACCTCTattattctctctttctttcttgtttctctatggttccttatatcttaagaaggaaatgaaaggaaaggaggtgcgggttcaattgcaggtgaatggcattt	9	osa-MIR530,bdi-MIR530a,bdi-MIR530b,gra-MIR530b,ppe-MIR530,fve-MIR530,eun-MIR530,tcc-MIR530a,tcc-MIR530b,	osa-MIR530	gtgatagagcTGCATTTGCACCTGCACCTAcagagaggaagatgaagcagcaagctagcaatacgtgcttgatcgctatacgctagcttcttgcacacaatgttgttcctggtctcttcctgatccctAGGTGCAGAGGCAGATGCAACtatgtcat	osa-miR530-5p	TGCATTTGCACCTGCACCTA	5'	Diff	gp2a	...((((((((((((((.(((.((((((((((((....((((.(((((((((((((.......................))))))))))).)).))))..)))))))))))).))).)))))))))).))))...	129	39.3	-57.9	1.1	12	12	22	15	9	16.5	12.7266	12.039	21.0939	14.8381	8.65723	16.3963	middle
90	95	osa-miR530-5p_R+1_1ss20AC_1	TGCATTTGCACCTGCACCTCC	21	NW_015953897.1	+	5008	5170	aaaccaaaatgttgcctttatcTGCATTTGCACCTGCACCTCTactattctctctttctttctttctttcttgtttctctatggttctttattatcttaggaaggaaatgaaatgaaaggaaaggaggtgcaggttcaattgcaggtcaatggcattttggat	9	osa-MIR530,bdi-MIR530a,bdi-MIR530b,gra-MIR530b,ppe-MIR530,fve-MIR530,eun-MIR530,tcc-MIR530a,tcc-MIR530b,	osa-MIR530	gtgatagagcTGCATTTGCACCTGCACCTAcagagaggaagatgaagcagcaagctagcaatacgtgcttgatcgctatacgctagcttcttgcacacaatgttgttcctggtctcttcctgatccctAGGTGCAGAGGCAGATGCAACtatgtcat	osa-miR530-5p	TGCATTTGCACCTGCACCTA	5'	Diff	gp2a	...((((((...((((((.(((((((.(((.((((((((((((.......((.((((((((((((((((((((........................))))))))))).)))).)))))))..)))))))))))).))).))))))).)).))))))))))..	158	36.8	-62.2	1	12	12	22	15	9	16.5	12.7266	12.039	21.0939	14.8381	8.65723	16.3963	middle
91	96	stu-miR1919-5p_R+2	TGTCGCAGATGACTTTCGCCCTT	23	NW_015804131.1	-	151094	151281	atcgaatcgttccgacgcctttgatgttcagatcttccggtgctccTGTCGCAGATGACTTTCGCCCTTctctacaacgacccttcgaatcaaatattttggaaggtttttagtgtgataaGTGCGAGTCATCTGTGACAGGataatggaagatctagttatcaaaggcttattggggcgttttcatc	4	nta-MIR1919,stu-MIR1919,sly-MIR1919b,sly-MIR1919c,	stu-MIR1919	TGTCGCAGATGACTTTCGCCCttctcattcagcccctttctctaaatctaattaatttgatttcaatgtggtaggACGAGAGTCATCTGTGACAGG	stu-miR1919-5p	TGTCGCAGATGACTTTCGCCC	5'	Diff	gp2a	...(((.((..((((.((((((((((...((((((((((....((((((((((((((((..((((.(((.(((((((..(((.((((((........)))))).)))..)).))).)).))).))))))))))))))))))))...))))))))))...))))))))))...))))..))..)))...	182	44.1	-89.3	1.1	15283	15581	16479	17846.5	13651.5	18958	16208.4	15631.7	15800.3	17653.9	13131.6	18838.8	high
92	96	stu-miR1919-5p_R+2	TGTCGCAGATGACTTTCGCCCTT	23	NW_015883078.1	+	14608	14764	tcttccgatgctccTGTCGCAGATGACTTTCGCCCTTctctacaacgacccttcatattccctcctttctcaaatctaaatttttacacatagaaatcaaatattttggtgggtgtttagtgtgataaGGGCGAGTCATCTGTGACAGGatgaagga	4	nta-MIR1919,stu-MIR1919,sly-MIR1919b,sly-MIR1919c,	stu-MIR1919	TGTCGCAGATGACTTTCGCCCttctcattcagcccctttctctaaatctaattaatttgatttcaatgtggtaggACGAGAGTCATCTGTGACAGG	stu-miR1919-5p	TGTCGCAGATGACTTTCGCCC	5'	Diff	gp2a	...(((.....((((((((((((((((..((((((((.((((((((.((((..((..........(((((.....................)))))..........))..)))))))..))).)).))))))))))))))))))))))))....)))	154	42	-56.3	0.9	15283	15581	16479	17846.5	13651.5	18958	16208.4	15631.7	15800.3	17653.9	13131.6	18838.8	high
93	97	stu-miR1919-5p_R+2_1ss12AG	TGTCGCAGATGGCTTTCGCCCTT	23	NW_015887789.1	-	34705	34852	cgctccTGTCGCAGATGCCTTTCGCCCTTctatacaacgccctttcagagccttctcctctattctaaattaccacgaatagttgattttttttttttgttagttgaagatttcagcctcatagggcgaatcgtttgcggcaggataa	2	nta-MIR1919,stu-MIR1919,	stu-MIR1919	TGTCGCAGATGACTTTCGCCCttctcattcagcccctttctctaaatctaattaatttgatttcaatgtggtaggACGAGAGTCATCTGTGACAGG	stu-miR1919-5p	TGTCGCAGATGACTTTCGCCC	5'	Diff	gp2a	...((((((((((((((...((((((((.....((((.((.(.....).))....((..((((((...........))))))..))..........))))..((((((...)))))).....)))))))).))))))))))))))...	142	43.2	-45.8	0.7	0	0	2.5	5.5	0	0	0	0	2.39703	5.44065	0	0	low
94	97	stu-miR1919-5p_R+2_1ss12AG	TGTCGCAGATGGCTTTCGCCCTT	23	NW_015932566.1	-	48560	48706	cgctccTGTCGCAGATGCCTTTCGCCCTTctatacaacgccctttcagagccttctcctctattctaaattaccacgaatagttgatttttttttttattagttgaagatttcagcctcatagggcgaatcgtttgcggcaggataa	2	nta-MIR1919,stu-MIR1919,	stu-MIR1919	TGTCGCAGATGACTTTCGCCCttctcattcagcccctttctctaaatctaattaatttgatttcaatgtggtaggACGAGAGTCATCTGTGACAGG	stu-miR1919-5p	TGTCGCAGATGACTTTCGCCC	5'	Diff	gp2a	...((((((((((((((...((((((((...........................((..((((((...........))))))..))...............((((((...)))))).....)))))))).))))))))))))))...	141	42.9	-45	0.7	0	0	2.5	5.5	0	0	0	0	2.39703	5.44065	0	0	low
95	98	ptc-miR2111a_R-1	TAATCTGCATCCTGAGGTTT	20	NW_015877958.1	-	32933	33039	taatgctatgttaggctatggTAATCTGCATCCTGAGGTTTagatcagcttctaatttactgcttctaGCCCTTGGGATGCAGATTACCtttacctcactagcagtg	50	ptc-MIR2111a,ptc-MIR2111b,mtr-MIR2111j,mtr-MIR2111k,mtr-MIR2111d,mtr-MIR2111f,mtr-MIR2111e,mtr-MIR2111a,mtr-MIR2111b,mtr-MIR2111i,mtr-MIR2111c,mtr-MIR2111n,mtr-MIR2111h,mtr-MIR2111o,mtr-MIR2111m,mtr-MIR2111g,gma-MIR2111b,gma-MIR2111e,gma-MIR2111d,gma-MIR2111c,gma-MIR2111a,gma-MIR2111f,ath-MIR2111b,ath-MIR2111a,mdm-MIR2111b,mdm-MIR2111a,lja-MIR2111,aly-MIR2111b,aly-MIR2111a,aly-MIR2111c,ppe-MIR211…	ptc-MIR2111b	atattgggtcaggattgggTAATCTGCATCCTGAGGTTTGgatcaccacatgttttgatctagtccttgggttgcagattacctcttcctcactgacaatgt	ptc-miR2111a	TAATCTGCATCCTGAGGTTTG	5'	Diff	gp2a	...(((((.((.(((....((((((((((((((..(((..((((..(((............)))))))..)))..))))))))))))))....))).)))))))...	101	42.1	-50.7	1.1	40	34	49.5	38.5	41	54.5	42.422	34.1106	47.4612	38.0845	39.4385	54.1574	middle
95	99	gma-miR2111a_2ss2TC21GC	GCCCTTGGGATGCAGATTACC	21	NW_015877958.1	-	32933	33039	taatgctatgttaggctatggTAATCTGCATCCTGAGGTTTagatcagcttctaatttactgcttctaGCCCTTGGGATGCAGATTACCtttacctcactagcagtg	50	ptc-MIR2111a,ptc-MIR2111b,mtr-MIR2111j,mtr-MIR2111k,mtr-MIR2111d,mtr-MIR2111f,mtr-MIR2111e,mtr-MIR2111a,mtr-MIR2111b,mtr-MIR2111i,mtr-MIR2111c,mtr-MIR2111n,mtr-MIR2111h,mtr-MIR2111o,mtr-MIR2111m,mtr-MIR2111g,gma-MIR2111b,gma-MIR2111e,gma-MIR2111d,gma-MIR2111c,gma-MIR2111a,gma-MIR2111f,ath-MIR2111b,ath-MIR2111a,mdm-MIR2111b,mdm-MIR2111a,lja-MIR2111,aly-MIR2111b,aly-MIR2111a,aly-MIR2111c,ppe-MIR211…	gma-MIR2111a	attgctgggtccggattaggTAATCTGCATCCTGAGGTTTAggacaatatcctttgttttgtttctaGTCCTTGGGATGCAGATTACGtcttccttgccagcactgta	gma-miR2111a	GTCCTTGGGATGCAGATTACG	3'	Diff	gp2a	...(((((.((.(((....((((((((((((((..(((..((((..(((............)))))))..)))..))))))))))))))....))).)))))))...	101	42.1	-50.7	1.1	14	12.5	6	12	22	9.5	14.8477	12.5406	5.75288	11.8705	21.1621	9.44028	middle
96	98	ptc-miR2111a_R-1	TAATCTGCATCCTGAGGTTT	20	NW_015942096.1	+	35505	35611	taatgctgtgttaggctatggTAATCTGCATCCTGAGGTTTagatcggtttttactttactgcttctaGCCCTTGGGATGCAGATTACCtttacctcactagcagtg	50	ptc-MIR2111a,ptc-MIR2111b,mtr-MIR2111j,mtr-MIR2111k,mtr-MIR2111d,mtr-MIR2111f,mtr-MIR2111e,mtr-MIR2111a,mtr-MIR2111b,mtr-MIR2111i,mtr-MIR2111c,mtr-MIR2111n,mtr-MIR2111h,mtr-MIR2111o,mtr-MIR2111m,mtr-MIR2111g,gma-MIR2111b,gma-MIR2111e,gma-MIR2111d,gma-MIR2111c,gma-MIR2111a,gma-MIR2111f,ath-MIR2111b,ath-MIR2111a,mdm-MIR2111b,mdm-MIR2111a,lja-MIR2111,aly-MIR2111b,aly-MIR2111a,aly-MIR2111c,ppe-MIR211…	ptc-MIR2111b	atattgggtcaggattgggTAATCTGCATCCTGAGGTTTGgatcaccacatgttttgatctagtccttgggttgcagattacctcttcctcactgacaatgt	ptc-miR2111a	TAATCTGCATCCTGAGGTTTG	5'	Diff	gp2a	...(((((.((.(((....((((((((((((((..(((..((((.((((.........))))..))))..)))..))))))))))))))....))).)))))))...	101	43	-51.4	1.1	40	34	49.5	38.5	41	54.5	42.422	34.1106	47.4612	38.0845	39.4385	54.1574	middle
96	99	gma-miR2111a_2ss2TC21GC	GCCCTTGGGATGCAGATTACC	21	NW_015942096.1	+	35505	35611	taatgctgtgttaggctatggTAATCTGCATCCTGAGGTTTagatcggtttttactttactgcttctaGCCCTTGGGATGCAGATTACCtttacctcactagcagtg	50	ptc-MIR2111a,ptc-MIR2111b,mtr-MIR2111j,mtr-MIR2111k,mtr-MIR2111d,mtr-MIR2111f,mtr-MIR2111e,mtr-MIR2111a,mtr-MIR2111b,mtr-MIR2111i,mtr-MIR2111c,mtr-MIR2111n,mtr-MIR2111h,mtr-MIR2111o,mtr-MIR2111m,mtr-MIR2111g,gma-MIR2111b,gma-MIR2111e,gma-MIR2111d,gma-MIR2111c,gma-MIR2111a,gma-MIR2111f,ath-MIR2111b,ath-MIR2111a,mdm-MIR2111b,mdm-MIR2111a,lja-MIR2111,aly-MIR2111b,aly-MIR2111a,aly-MIR2111c,ppe-MIR211…	gma-MIR2111a	attgctgggtccggattaggTAATCTGCATCCTGAGGTTTAggacaatatcctttgttttgtttctaGTCCTTGGGATGCAGATTACGtcttccttgccagcactgta	gma-miR2111a	GTCCTTGGGATGCAGATTACG	3'	Diff	gp2a	...(((((.((.(((....((((((((((((((..(((..((((.((((.........))))..))))..)))..))))))))))))))....))).)))))))...	101	43	-51.4	1.1	14	12.5	6	12	22	9.5	14.8477	12.5406	5.75288	11.8705	21.1621	9.44028	middle
97	100	stu-miR3627-5p_1ss5AT	TCGCTGGAGAGATGGCACTTAG	22	NW_015843816.1	+	31788	31905	agaagagattgaggggatcttgTCGCTGGAGAGATGGCACTTAGcattcaattggtaaaatgccaaaaatggaacctaagtgcctctgtctttcgacacgatgcccacaatttctgtt	3	stu-MIR3627,fve-MIR3627b,fve-MIR3627a,	stu-MIR3627	TCGCAGGAGAGATGGCACTTAGcattccttttaattggtaaaatgcctaaatggaaccaattAAGTGCCTCTGTCTTTCGACA	stu-miR3627-5p	TCGCAGGAGAGATGGCACTTAG	5'	Diff	gp2a	...((((((((.(((.(((.(((((..(((.(((.(((((((((..((((.(((((.....)))))...))))..)))))))))))).)))..))))).))).))).))))))))...	112	44.1	-55.8	1.1	0	2.5	0	5.5	4.5	0	0	2.50813	0	5.44065	4.32862	0	low
98	101	fve-MIR3627b-p5_2ss7AT22AT	TGTCGCTGGAGAGATGGCACTT	22	NW_015940314.1	+	17088	17206	aagggggattgagggggtctTGTCGCTGGAGAGATGGCACTTagcattcaattggtaaaatgccaaaaattggaacccaagtgcctctgtctttcgacacgatgcccacaatttctgtt	3	stu-MIR3627,fve-MIR3627b,fve-MIR3627a,	fve-MIR3627b	atcctgTCGCAGGAGAGATGGCACTACCtagctttacgcatacgtaacgagatatatacgtacgtggtaaatatatatagatgagttattgatggtgtagcagctagcttgtgccatcctcctgtgac	fve-MIR3627b-p5	tgTCGCAGGAGAGATGGCACTA	5'	New	gp2a	...((..((((.(((..((.(((((..(((.(((.(((((((....((((((((((.....))))...))))))....)))))))))).)))..))))).))..))).))))..))...	113	47.1	-48.6	0.9	41.5	38.5	43.5	125.5	125	106	44.0128	38.6252	41.7083	124.146	120.239	105.334	middle
99	101	fve-MIR3627b-p5_2ss7AT22AT	TGTCGCTGGAGAGATGGCACTT	22	NW_015940314.1	+	26518	26635	aagggggattgagggggtctTGTCGCTGGAGAGATGGCACTTagcattctattggtaaaatgccaaaaatggaacctaagtgcctctttctttcgacacgatgcccacaatttctgtt	2	fve-MIR3627b,fve-MIR3627a,	fve-MIR3627b	atcctgTCGCAGGAGAGATGGCACTACCtagctttacgcatacgtaacgagatatatacgtacgtggtaaatatatatagatgagttattgatggtgtagcagctagcttgtgccatcctcctgtgac	fve-MIR3627b-p5	tgTCGCAGGAGAGATGGCACTA	5'	New	gp2a	...((..((((.(((..((.(((((..(((((((.(((((((((..((((((((((.....))))...)))))).))))))))))))))))..))))).))..))).))))..))...	112	45.8	-54.8	1	41.5	38.5	43.5	125.5	125	106	44.0128	38.6252	41.7083	124.146	120.239	105.334	middle
100	102	mtr-MIR4414a-p5_2ss7CA18GA	CAGCTGATGACTCGTTGATTC	21	NW_015913844.1	-	12416	12622	tagggcaatggagaaattaaggagctctctccagtccagtccgaggcagatcgaaggctataaacaCAGCTGATGACTCGTTGATTCttaagcacgtcaactagcattgggaaattgacgtgttttgggattcaacgatgcatgagctatgtttagctatcgctgtcacgTCTTGGACTGAAGGGAGCTCCctattatgccactgcc	9	mtr-MIR4414a,gma-MIR4414b,mdm-MIR319c,mdm-MIR319h,mes-MIR319e,vvi-MIR319b,csi-MIR156j,cme-MIR319b,rco-MIR319b,	mtr-MIR4414a	ggctgagactcAGCTGCTGACTCGTTGGTTCAatagctcacaacatgcatagtgtcaacgtgtgtgcttctgATCCAACGATGCGGGAGCTGCattccagtcgt	mtr-MIR4414a-p5	cAGCTGCTGACTCGTTGGTTC	5'	New	gp2a	...((((.(((......((.((((((((((.((((((((..((.(((((..(((..((((..((((.((((.(((..((((((((((..(((((((((((..............)))))))))))..)))).))))))..))).)))).))))))))..)))))))).))..)))))))).)))))))))).)).....))).))))	204	47.3	-97.1	1	0	15	36	9	5	0	0	15.0488	34.5173	8.90287	4.80957	0	middle
101	104	stu-MIR6022-p5	AAACCTTATGAACCTAACGCGACT	24	NW_015909966.1	+	50102	50289	caaacttgagttttaagttgcaaggtccatttcccgagtcaattcaAAACCTTATGAACCTAACGCGACTtgatctgtcataagatcacaggatgtttgaggcctgaaaagatcaagtcgcattaggctcataaggttttgaattgacttgggaagaggacccggcaactcgttgaagctcaagtcta	1	stu-MIR6022,	stu-MIR6022	ctgaactgaacaatacgatcctggatattctcctttccatcactaacttatttaggctcagagtttcaagttgtaaggtcctcttcctgagtcgattcaaaaccttatgaacctaacgcgacttgatcttaagttacatttacgaaaccccaatcatgggtagaggactctgtagtcggtctaaataacttagtgaTGGAAGGGAGAATATCCAGGAtggtattgttccgttcaggg	stu-MIR6022-p5	aaaccttatgaacctaacgcgact	5'	New	gp2a	...((((((((((((((((((..(((((..(((((((((((((((((((((((((((.(((((.(((((((((((((((....)))..((((..........))))...)))))))))))).))))).)))))))))))))))))))))))))))..)))))..))))))...))))))))))))...	182	42.6	-107.9	1.3	276	270	257	204	229	284	292.712	270.878	246.415	201.798	220.278	282.215	middle
102	105	gma-miR6300_R+5_2	GTCGTTGTAGTATAGTGGTGAGT	23	NW_015866032.1	+	5148	5269	aaGTCGTTGTAGTATAGTGGTGAGTattcccgcctgtcatgcgggtgacccgagttcgacccccggcaacggcgccaaaaagtgatcggatccaaccctacaccactatataatagcgagga	1	gma-MIR6300,	gma-MIR6300	aggtaaaaatacttaccactatattacaacaacttgtttgtgaaattcaatggtaattttaaataataaatgttttaatattaccgatagcatttgattatatttttgttttaaagttacatttgattatatcgctatcggctataatgtaagtcatattcatccaatatcatgcaacttttttgtatagatatattaatattactcgataatcatcaaGTCGTTGTAGTATAGTGGtaagtattcccgcc	gma-miR6300	GTCGTTGTAGTATAGTGG	5'	Diff	gp2a	...(((((((..((((((((((((......((((((.....))))))..((((.........(((....)))(((......))).))))........)).))))))))))..)))))))...	116	53.3	-44.1	0.7	34	106	28	30	35	15	36.0587	106.345	26.8468	29.6762	33.667	14.9057	middle
103	106	stu-miR7122-5p_1ss18TG	TTATACAGAGAAACCGCGGTCG	22	NW_015793641.1	+	6761	6905	tctatagtggccccttaccattctgTTATACAGAGAAACCGCGGTCGaggaaactaagaaatttggattttttttattccttttcttctcattctctaccgcgtttctccgtataacgaagtggtttttgggtcaatactattat	1	stu-MIR7122,	stu-MIR7122	TTATACAGAGAAACCGCTGTCGagtctgataaaaaaatttggtcttctcatgctccACAGCGTTTCTCTGTATAACC	stu-miR7122-5p	TTATACAGAGAAACCGCTGTCG	5'	Diff	gp2a	...((((((((((...((((((..(((((((.(((((((.(((((.(((((....((((((...(((..........))).))))))....))))).)))))))))))).)))))))..))))))....)))))...)))))...	139	37.9	-56.1	1	4924.5	5590.5	7762	7139	6489	6302.5	5222.67	5608.68	7442.3	7061.96	6241.86	6262.88	high
104	106	stu-miR7122-5p_1ss18TG	TTATACAGAGAAACCGCGGTCG	22	NW_015889574.1	+	35878	35997	taatggcccttaccattctgTTATACAGAGAAACCGCGGTCGagttaactgagaaatttggcttttcttctcattctctaccgcgtttctccgtataaccaaatggttttagggtcaata	1	stu-MIR7122,	stu-MIR7122	TTATACAGAGAAACCGCTGTCGagtctgataaaaaaatttggtcttctcatgctccACAGCGTTTCTCTGTATAACC	stu-miR7122-5p	TTATACAGAGAAACCGCTGTCG	5'	Diff	gp2a	...(((((((.((((((..(((((((.(((((((.(((((.(((......((((((.......))))))......))).)))))))))))).)))))))..))))))...)))))))...	114	40.8	-51.9	1.1	4924.5	5590.5	7762	7139	6489	6302.5	5222.67	5608.68	7442.3	7061.96	6241.86	6262.88	high
105	107	rgl-miR7972_1ss14TG	TTGTCAGGCTTGTGATTCTCC	21	NW_015877381.1	+	14488	14656	atgatacaattttcttgtcgaaggagaattacaaatctaacaaatacaccaatttcctataataaagttcttctttcttagaaagagacatgttctttccgtttttggaaagtgacatatTTGTCAGGCTTGTGATTCTCCtttgatggcatagaaaatagtaccaatc	1	rgl-MIR7972,	rgl-MIR7972	ctgaatcgaaggaaaatttcaagcttgacaaatacgtcttccatggcgtccgtcccaaaccagtcttcctatatgtggaaagggtacacaaaggaagaaaggatacacaaaagactagcaaaatagtccacaatactctttccaccatttttaagggagtcagtcttatTTGTCAGGCTTGTTATTCTCCttcgatggcg	rgl-miR7972	TTGTCAGGCTTGTTATTCTCC	3'	Diff	gp2a	.((.(((.(((((((..(((((((((((((((((..((.(((((((....................(((..((((((...)))))))))..((((((((((....))))))).))).))))))).))..)))))))))))))))))..)....)))))).))).))...	165	32	-55	1	9738	7240	6096	6724	8393	9012	10327.6	7263.54	5844.92	6651.44	8073.35	8955.35	high
106	108	rgl-MIR7972-p3_1ss11TG	TCAGGCTTGTGATTCTCCTTC	21	NW_015897398.1	-	78	246	atggactgatacaattttcttgttaagacagaaggagaattacaaatctggcaaatacgcgtccgcaataataaagttcctctttcttaaaaagtccggttttggaaagtgacatatttgTCAGGCTTGTGATTCTCCTTCcatggcatagaaaatagtatcaatcggt	1	rgl-MIR7972,	rgl-MIR7972	ctgaatcgaaggaaaatttcaagcttgacaaatacgtcttccatggcgtccgtcccaaaccagtcttcctatatgtggaaagggtacacaaaggaagaaaggatacacaaaagactagcaaaatagtccacaatactctttccaccatttttaagggagtcagtcttatTTGTCAGGCTTGTTATTCTCCttcgatggcg	rgl-MIR7972-p3	TCAGGCTTGTTATTCTCCttc	3'	New	gp2a	...((.((((((.(((((((((..(.....(((((((((((((((..((((((((((.((....)).........(((...((((((.((((.......)))))))))).))).))))))))))..)))))))))))))))..)..)).))))))).)))))).))...	163	36.7	-57.9	0.9	232	146	168	168	187	107	246.047	146.475	161.081	166.187	179.878	106.327	middle
107	109	rgl-miR7972	TTGTCAGGCTTGTTATTCTCC	21	NW_015912346.1	-	35354	35507	ttgttaagcagaaggagaattacaaatctgacaaataggtttcggcgtcccggatttccttaataaagttcttttttcttaaaaaagacatgttctttccgtttttggaaagtgacatatTTGTCAGGCTTGTGATTCTCCttcgatgacacag	1	rgl-MIR7972,	rgl-MIR7972	ctgaatcgaaggaaaatttcaagcttgacaaatacgtcttccatggcgtccgtcccaaaccagtcttcctatatgtggaaagggtacacaaaggaagaaaggatacacaaaagactagcaaaatagtccacaatactctttccaccatttttaagggagtcagtcttatTTGTCAGGCTTGTTATTCTCCttcgatggcg	rgl-miR7972	TTGTCAGGCTTGTTATTCTCC	3'	Yes	gp2a	.(((((....(((((((((((((((..(((((((((.((.(((((....)))))...))..........((((((((...)))))))).((((((((((((....))))))).))))))))))))))..)))))))))))))))..)))))...	150	36.4	-57.2	1	4	2.5	0	0	0	0	4.2422	2.50813	0	0	0	0	low
108	110	rgl-miR7972_R+1_1ss14TG	TTGTCAGGCTTGTGATTCTCCA	22	NW_015918358.1	-	29896	30040	aggagaattataagtcttgcaattaggtttcggtatcgcgggtttcctttaataaatttcttctttcttaaaaaagacatgttctttccttcttggttccgtttttggaaagtgacatatTTGTCAGGCTTGTGATTCTCCTtcc	1	rgl-MIR7972,	rgl-MIR7972	ctgaatcgaaggaaaatttcaagcttgacaaatacgtcttccatggcgtccgtcccaaaccagtcttcctatatgtggaaagggtacacaaaggaagaaaggatacacaaaagactagcaaaatagtccacaatactctttccaccatttttaagggagtcagtcttatTTGTCAGGCTTGTTATTCTCCttcgatggcg	rgl-miR7972	TTGTCAGGCTTGTTATTCTCC	3'	Diff	gp2a	(((((((((((((((((..(((..(((..((.(.....).))...))).............(((((......))))).(((((((((((....((....)).....)))))).)))))..)))..)))))))))))))))))...	142	35.9	-41.3	0.8	4	11.5	0	0	0	0	4.2422	11.5374	0	0	0	0	middle
109	111	rgl-miR7972_2ss14TG21CT	TTGTCAGGCTTGTGATTCTCT	21	NW_015952907.1	-	25510	25689	atggtggtccgtctaatcgaatgatacaattttttgtttcatagaaagagaattacaaatctaacaaatttttttgagacatgttatttccgtttttggaaagtggaatatTTGTCAGGCTTGTGATTCTCCttcaatgacaatgaaaatggtatcaatcgataactgaatctccacgct	1	rgl-MIR7972,	rgl-MIR7972	ctgaatcgaaggaaaatttcaagcttgacaaatacgtcttccatggcgtccgtcccaaaccagtcttcctatatgtggaaagggtacacaaaggaagaaaggatacacaaaagactagcaaaatagtccacaatactctttccaccatttttaagggagtcagtcttatTTGTCAGGCTTGTTATTCTCCttcgatggcg	rgl-miR7972	TTGTCAGGCTTGTTATTCTCC	3'	Diff	gp2a	...((((....((..(((((.((((((...((((..((((((.(((.(((((((((((..((.((((((.(((......(((....((((((....)))))))))))).)))))).))..))))))))))).))).)))).))..))))..)))))).)))))....))....))))...	174	32.8	-55.8	0.9	0	0	0	8	0	0	0	0	0	7.91367	0	0	low
110	112	stu-miR8036-3p_1ss2AT	TTTGTCTTTCCGATGCCTCCCA	22	NW_015886920.1	-	9635	9761	ttatgagaggttattggagtgggaggtgtcgaaagatatagttatatttgttttctttcaattcaaagttgaaagaataaaaataatTTTGTCTTTCCGATACCTCCCAttcccatggcttccgctt	2	stu-MIR8036,ppe-MIR482a,	stu-MIR8036	GGAGGAATCGAAAGATATAAGgatttatttattttttcaatttgattggaaaaatagaaaaaaaaagaatTATGTCTTTCCGATGCCTCCCA	stu-miR8036-3p	TATGTCTTTCCGATGCCTCCCA	3'	Diff	gp2a	....(.((((..((.(((((((((((((((((((((((.((((((.(((((..(((((((((.....)))))))))))))).)))))).))))))).)))))))))))))))).))..)))))....	119	34.6	-60.4	1.4	1849.5	2303.5	2545.5	2658	2285.5	2625	1961.49	2310.99	2440.66	2629.32	2198.46	2608.5	high
111	112	stu-miR8036-3p_1ss2AT	TTTGTCTTTCCGATGCCTCCCA	22	NW_015950448.1	+	4706	4824	tgagaagttattggagtgggaggtgtctaaagataaatttatatttgtttttttcaattcaaagttgaaaaataaaataatTTTGTCTTTCCGATGCCTCCCAttcacattgcttccgc	3	stu-MIR8036,bdi-MIR2118a,ppe-MIR482a,	stu-MIR8036	GGAGGAATCGAAAGATATAAGgatttatttattttttcaatttgattggaaaaatagaaaaaaaaagaatTATGTCTTTCCGATGCCTCCCA	stu-miR8036-3p	TATGTCTTTCCGATGCCTCCCA	3'	Diff	gp2a	.(.(((((...((((((((((((..((.(((((((((.((((.((((((((..(((((.....))))))))))))))))).)))))))))..))..)))))))))).))..))))))..	116	31.9	-46.8	1.2	1849.5	2303.5	2545.5	2658	2285.5	2625	1961.49	2310.99	2440.66	2629.32	2198.46	2608.5	high
112	113	ath-miR8175_L+4_1ss6AG	GTTCGGTCCCCGGCAACGGCGCCA	24	NW_015887912.1	-	47226	47387	ttggacccgatcactttttggcaccgttgccggggatcgaaccctggtcacccgcgtgacaggcaggaatactcaccactatactggtaagtattcccgcctgtcacgcgggtgacccggGTTCGGTCCCCGGCAACGGCGCCAaaaagtgatcgggtcaaa	1	ath-MIR8175,	ath-MIR8175	cttaaggcaatttgacctatatcaaatttggcaccgttgccggggatcgacccgggtcacccgcgtgacaggcgggaatacttaccacttagtacaacgacccaatatagtggtaagtattctcgcatgtcactcgggttcGATCCCCGGCAACGGCGCCAaatttgatatagctcaaatcgccttaag	ath-miR8175	GATCCCCGGCAACGGCGCCA	3'	Diff	gp2a	...(((((((((((((((((((.(((((((((((((((((((((.(((((((((((((((((((.((((((((.((((......)))).)))))))).))))))))))))))))))).))))))))))))))))))))).)))))))))))))))))))...	156	59.3	-150.1	1.6	5	0	0	0	6	5	5.30275	0	0	0	5.77149	4.96857	low
1	1	fve-miR156a	TTGACAGAAGAGAGTGAGCAC	21	NW_015790981.1	-	14334	14475	tTTGACAGAAGAGAGAGAGCACgaggtaattctggttccgcacccatattgagagacaacatgttctccttcacacctgatagagaaaccaaagagtttagattaataatcaaacaatcacaataataatatactttttcaa	46	ptc-MIR156d,mtr-MIR156d,mtr-MIR156i,gma-MIR156h,gma-MIR156k,gma-MIR156n,gma-MIR156o,osa-MIR156f,osa-MIR156h,osa-MIR156j,osa-MIR156d,ath-MIR156d,bdi-MIR156g,bdi-MIR156c,mdm-MIR156n,mdm-MIR156e,mdm-MIR156j,mdm-MIR156f,mdm-MIR156k,mdm-MIR156a,mdm-MIR156c,mdm-MIR156h,aly-MIR156d,ppe-MIR156e,mes-MIR156e,mes-MIR156f,zma-MIR156d,zma-MIR156b,csi-MIR156b,cme-MIR156j,cme-MIR156d,fve-MIR156a,fve-MIR156c,fve…	fve-MIR156b	tgTTGACAGAAGAGAGTGAGCACaacccggcattggtggaagagagctttgtcactgttgggagtgtgctcgctcttcttctgtcagca	fve-miR156a	TTGACAGAAGAGAGTGAGCAC	5'	Yes	gp2b	..........(((((((.((((.(((....))).))...)).....(((((.((.........(((((..(((....)))..)))))........((((.((((...))))))))..)).)))))........)))))))..	130	35.2	-22.2	0.4	13	17	11.5	17.5	16.5	14	13.7871	17.0553	11.0263	17.3111	15.8716	13.912	middle
2	2	stu-miR156f-5p_L-1R+1	TGACAGAAGAGAGTGAGCAT	20	NW_015800414.1	+	34492	34626	ggatttcTGACAGAAGAGAGTGAGCATtttcctgctgccatcatccacaacttcttggaagttacagattgtgtagatggcttatggaatcttggattgctgctgcagctgatgagtttctactgctggaaactg	2	stu-MIR156f,cca-MIR156b,	stu-MIR156f	CTGACAGAAGAGAGTGAGCAtacacatataattatataaatatttttacttaattttcttgatatatattgtatatataattttgcgagtgCTCACTTCTCTTTCTGTCAATC	stu-miR156f-5p	CTGACAGAAGAGAGTGAGCA	5'	Diff	gp2b	((.(((((..(((.(((((((.(((...((((....((((((...(((((..(((.(.......)))))))))..))))))....))))........(((....)))))).))...))))).)))..))))))).	134	44.4	-36.8	0.6	2.5	0	4.5	3	3.5	0	2.65137	0	4.31466	2.96762	3.3667	0	low
3	2	stu-miR156f-5p_L-1R+1	TGACAGAAGAGAGTGAGCAT	20	NW_015891429.1	-	71096	71131	TGACAGAAGAGAGTGAGCATtgacttgcttctggca	2	stu-MIR156f,cca-MIR156b,	stu-MIR156f	CTGACAGAAGAGAGTGAGCAtacacatataattatataaatatttttacttaattttcttgatatatattgtatatataattttgcgagtgCTCACTTCTCTTTCTGTCAATC	stu-miR156f-5p	CTGACAGAAGAGAGTGAGCA	5'	Diff	gp2b	...((((((..(((........)))..))))))...	30	47.2	-10.9	0.6	2.5	0	4.5	3	3.5	0	2.65137	0	4.31466	2.96762	3.3667	0	low
4	3	cca-MIR156c-p5_2ss7CT17AC	AGAGCATTGAGAGGACCT	18	NW_015813069.1	+	9216	9290	gtgggtgttAGAGCATTGAGAGGACCTttccctagtacgagaggaccggaaaggatgcacctctagtgtaccagt	1	cca-MIR156c,	cca-MIR156c	ggatgTTGACAGAAGATAGAGAGCACtgagaggacatgaagtgcatatatataatgcacctcgcttctttgtgctctttatacttctgtcattaccct	cca-MIR156c-p5	AGAGCACtgagaggacat	5'	New	gp2b	.((((..((((((((((....((.((((((........)))))).))......)))))...)))))..).)))..	72	52	-20.5	0.5	10.5	3.5	6.5	4	0	4.5	11.1358	3.51138	6.23228	3.95683	0	4.47171	middle
5	3	cca-MIR156c-p5_2ss7CT17AC	AGAGCATTGAGAGGACCT	18	NW_015905264.1	+	55856	55896	AGAGCATTGAGAGGACCTttccctagtacgagaggaccggg	1	cca-MIR156c,	cca-MIR156c	ggatgTTGACAGAAGATAGAGAGCACtgagaggacatgaagtgcatatatataatgcacctcgcttctttgtgctctttatacttctgtcattaccct	cca-MIR156c-p5	AGAGCACtgagaggacat	5'	New	gp2b	............((.((((((........)))))).))...	26	56.1	-9.2	0.4	10.5	3.5	6.5	4	0	4.5	11.1358	3.51138	6.23228	3.95683	0	4.47171	middle
6	4	bcy-miR156	TTTGACAGAAGATAGAGAGCAC	22	NW_015815526.1	-	371639	371778	TTTGACAGAAGAGAGAGAGCACcactggaatctgagactccagagaagcagtttccggaaggaataataccaggaccagaataattggcacccctagcaactgaaccttgcagaacaaggtcggatgtaggattttcaga	2	bcy-MIR156,bgy-MIR156,	bcy-MIR156	tgTTTGACAGAAGATAGAGAGCACagatgatgatgtgcaatttttggattctgcatctcactcctttgtgctctctatgcttctgtcatca	bcy-miR156	TTTGACAGAAGATAGAGAGCAC	5'	Yes	gp2b	.......(((((............((((..((((......))))........((((....)))).....))))..((((.....))))....(((.(((.(((.((((((.....))))))))).)))))).)))))...	130	46.4	-34.4	0.5	0	3	0	0	5.5	0	0	3.00975	0	0	5.29053	0	low
7	5	gma-miR156e	CTGACAGAAGATAGAGAGCAC	21	NW_015826102.1	-	18963	18999	aggttttgtgagtgggCTGACAGAAGAGAGAGAGCAC	13	gma-MIR156e,ath-MIR157d,mdm-MIR156p,mdm-MIR156r,mdm-MIR156x,mdm-MIR156z,mdm-MIR156aa,mdm-MIR156q,mdm-MIR156s,mdm-MIR156y,aly-MIR157d,ppe-MIR156f,cme-MIR156f,	gma-MIR156e	aggaggtgttggtgatgctgCTGACAGAAGATAGAGAGCACtgatgatgaaatgcatgaaagggaatggcatctcactcctttgtgctctctagtcttctgtcatcatccttctccctcccctc	gma-miR156e	CTGACAGAAGATAGAGAGCAC	3'	Yes	gp2b	...((((((.((....)).))))))............	22	51.4	-6.5	0.3	13.5	20	9	6.5	15.5	11.5	14.3174	20.065	8.62931	6.42985	14.9097	11.4277	middle
8	5	gma-miR156e	CTGACAGAAGATAGAGAGCAC	21	NW_015873033.1	-	14211	14295	tatgatctcttttaaggtgaccacaacgattttctgagttgtgtaaatggtgttgtgagtgggCTGACAGAAGAGAGAGAGCACa	13	gma-MIR156e,ath-MIR157d,mdm-MIR156p,mdm-MIR156r,mdm-MIR156x,mdm-MIR156z,mdm-MIR156aa,mdm-MIR156q,mdm-MIR156s,mdm-MIR156y,aly-MIR157d,ppe-MIR156f,cme-MIR156f,	gma-MIR156e	aggaggtgttggtgatgctgCTGACAGAAGATAGAGAGCACtgatgatgaaatgcatgaaagggaatggcatctcactcctttgtgctctctagtcttctgtcatcatccttctccctcccctc	gma-miR156e	CTGACAGAAGATAGAGAGCAC	3'	Yes	gp2b	..((.((((((((......((((..(((((((...))))))).....)))).((((.((....)).))))..)))))))).))..	81	42.4	-19.8	0.5	13.5	20	9	6.5	15.5	11.5	14.3174	20.065	8.62931	6.42985	14.9097	11.4277	middle
9	6	gma-miR156b_L+1R-1	TTGACAGAAGAGAGAGAGCAC	21	NW_015837561.1	+	42993	43133	TTGACAGAAGAGAGAGAGCACgaggaaattccggtcctgtacccatattgaacatggattccttggcacctgatagaaaaatgcaaaactaacctacttcagaaaacttatgctggaatttaataatcttgcactttcaat	18	gma-MIR156b,gma-MIR156f,ath-MIR156j,bdi-MIR156a,mdm-MIR156w,mdm-MIR156t,mdm-MIR156u,mdm-MIR156v,mes-MIR156k,cas-MIR156j,rco-MIR156e,aqc-MIR529,ahy-MIR156c,ahy-MIR156a,far-MIR156a,far-MIR156b,far-MIR529,tcc-MIR156a,	gma-MIR156f	atatctcatgtTGACAGAAGAGAGAGAGCACAacccgggaatggttaaaggagtctttgcctttgttgggagtgtgctctctcttcctctgtcatcatcacattca	gma-miR156b	TGACAGAAGAGAGAGAGCACA	5'	Diff	gp2b	...........(((((.(((.((..((((((((((...((..((((.......))))............(((((((.................)))..))))...))....)))))))))).....)).))).)))))...	127	38.3	-27	0.5	0	0	4.5	3.5	3.5	0	0	0	4.31466	3.46223	3.3667	0	low
10	6	gma-miR156b_L+1R-1	TTGACAGAAGAGAGAGAGCAC	21	NW_015908193.1	+	13624	13659	TTGACAGAAGAGAGAGAGCACaaggtaattctggtg	18	gma-MIR156b,gma-MIR156f,ath-MIR156j,bdi-MIR156a,mdm-MIR156t,mdm-MIR156u,mdm-MIR156v,mdm-MIR156w,mes-MIR156k,cas-MIR156j,rco-MIR156e,aqc-MIR529,ahy-MIR156c,ahy-MIR156a,far-MIR156a,far-MIR156b,far-MIR529,tcc-MIR156a,	gma-MIR156f	atatctcatgtTGACAGAAGAGAGAGAGCACAacccgggaatggttaaaggagtctttgcctttgttgggagtgtgctctctcttcctctgtcatcatcacattca	gma-miR156b	TGACAGAAGAGAGAGAGCACA	5'	Diff	gp2b	....(((((...................)))))...	29	44.4	-3	0.2	0	0	4.5	3.5	3.5	0	0	0	4.31466	3.46223	3.3667	0	low
11	7	ptc-miR156a_L+1	TTGACAGAAGAGAGTGAGCAC	21	NW_015890925.1	-	2021	2118	gcatgctgctctgatttgcatgtgttgggtggttcagtgaaacagtctcaggctcggatgaaccccatgaattagTTGACAGAAGAGAGAGAGCACga	44	ptc-MIR156d,mtr-MIR156d,mtr-MIR156i,gma-MIR156h,gma-MIR156k,gma-MIR156n,gma-MIR156o,osa-MIR156f,osa-MIR156h,osa-MIR156j,osa-MIR156d,ath-MIR156d,bdi-MIR156g,bdi-MIR156c,mdm-MIR156n,mdm-MIR156e,mdm-MIR156j,mdm-MIR156f,mdm-MIR156k,mdm-MIR156a,mdm-MIR156c,mdm-MIR156h,aly-MIR156d,ppe-MIR156e,mes-MIR156e,mes-MIR156f,zma-MIR156d,zma-MIR156b,csi-MIR156b,cme-MIR156j,cme-MIR156d,fve-MIR156a,fve-MIR156c,fve…	ptc-MIR156d	gtaagtgagtTGACAGAAGAGAGTGAGCACacagggtactttcttgcatgacgttcatgcttgaagctttgcgtgcccaccctctatctgtcaccccatca	ptc-miR156a	TGACAGAAGAGAGTGAGCAC	3'	Diff	gp2b	...((((.((((..((((((.......((.((((((.......(((.....)))....))))))))..........)).))))..))))..))))...	92	49	-22.8	0.5	13	17	11.5	17.5	16.5	14	13.7871	17.0553	11.0263	17.3111	15.8716	13.912	middle
12	8	stu-miR156f-3p_L+2R-1_2ss22AC23TC	TGCTCACTTCTCTTTCTGTCACC	23	NW_015908598.1	-	107658	107822	ggtggaaagcaatgggggaggaacagagagatgacagactgacagaagagagtgagcacacgcacacaattgtatagagtgtatacctttgtgtttatattatttgcgtgTGCTCACTTCTCTTTCTGTCACCtatttgttttcttccctctcttgccttccttt	30	stu-MIR156f,mtr-MIR156i,gma-MIR156k,gma-MIR156h,osa-MIR156a,osa-MIR156f,osa-MIR156h,osa-MIR156l,bdi-MIR156b,mdm-MIR156d,mdm-MIR156l,sbi-MIR156f,sbi-MIR156a,mes-MIR156e,mes-MIR156f,zma-MIR156f,zma-MIR156g,zma-MIR156d,cme-MIR156j,cme-MIR156c,fve-MIR156e,aof-MIR156a,cpa-MIR156a,cpa-MIR156b,rco-MIR156b,vca-MIR156a,vun-MIR156a,han-MIR156b,har-MIR156a,tcc-MIR156g,	stu-MIR156f	CTGACAGAAGAGAGTGAGCAtacacatataattatataaatatttttacttaattttcttgatatatattgtatatataattttgcgagtgCTCACTTCTCTTTCTGTCAATC	stu-miR156f-3p	CTCACTTCTCTTTCTGTCAATC	3'	Diff	gp2b	...((((.((((.((((((((((((((.((.(((((((.......((((((((((((((((((((((((..(((((.....)))))..))))))...........))))))))))))).)))))))))))).)).)))))..)))))))))..)))).))))...	159	43	-76	1.1	785	749.5	656	776	617.5	1093	832.531	751.937	628.981	767.626	593.982	1086.13	middle
13	8	stu-miR156f-3p_L+2R-1_2ss22AC23TC	TGCTCACTTCTCTTTCTGTCACC	23	NW_015927187.1	-	17051	17194	acagagagtatcatcaacacaatctaatagagatctgaattctggtcatggggttttttcctactattttttccataaaggggtattatatttggtttcagatctganattatttgcgtgTGCTCACTTCTCTTTCTGTCACCt	30	stu-MIR156f,mtr-MIR156i,gma-MIR156k,gma-MIR156h,osa-MIR156a,osa-MIR156f,osa-MIR156h,osa-MIR156l,bdi-MIR156b,mdm-MIR156d,mdm-MIR156l,sbi-MIR156f,sbi-MIR156a,mes-MIR156e,mes-MIR156f,zma-MIR156f,zma-MIR156g,zma-MIR156d,cme-MIR156j,cme-MIR156c,fve-MIR156e,aof-MIR156a,cpa-MIR156a,cpa-MIR156b,rco-MIR156b,vca-MIR156a,vun-MIR156a,han-MIR156b,har-MIR156a,tcc-MIR156g,	stu-MIR156f	CTGACAGAAGAGAGTGAGCAtacacatataattatataaatatttttacttaattttcttgatatatattgtatatataattttgcgagtgCTCACTTCTCTTTCTGTCAATC	stu-miR156f-3p	CTCACTTCTCTTTCTGTCAATC	3'	Diff	gp2b	((((((((.........((((....((((((((((((((..(..(...(((((.....)))))........(((......)))........)..).)))))))))....)))))....)))).........)))))))).....	139	35.4	-33.3	0.7	785	749.5	656	776	617.5	1093	832.531	751.937	628.981	767.626	593.982	1086.13	middle
14	9	gma-miR156r_L+2_2ss3CT23TC	AATTGACAGAAGATAGAGAGCAC	23	NW_015935875.1	-	26710	26753	AATTGACAGAAGATAGAGAGCATgcttcagcttgaactttagag	16	mtr-MIR156d,gma-MIR156r,gma-MIR156h,gma-MIR156k,gma-MIR156n,gma-MIR156o,mdm-MIR156n,mdm-MIR156f,mdm-MIR156k,mes-MIR156e,csi-MIR156b,fve-MIR156e,bna-MIR156f,rco-MIR156b,vun-MIR156a,tcc-MIR156g,	gma-MIR156r	ttgttaattgcttttttctcttctagttatatggggttcgtgatcataatatgatgacaatcctaatgcataatattctttcgtattttatgcagagagagtgaaggatcaagcacatgcataagatagagcctgCTGACAGAAGATAGAGAGCATagctgaacat	gma-miR156r	CTGACAGAAGATAGAGAGCAT	5'	Diff	gp2b	.............(((((..((.((....)).))..)))))...	28	38.6	-6	0.4	24	34	20.5	22	36	29	25.4532	34.1106	19.6557	21.7626	34.6289	28.8177	middle
15	9	gma-miR156r_L+2_2ss3CT23TC	AATTGACAGAAGATAGAGAGCAC	23	NW_015951832.1	-	99004	99146	AATTGACAGAAGATAGAGAGCATgtgacagcttgaactttagaaggattcgctgtgcatcagtccacaagtaggcgattccctcccatttgctgatgctgcttcagcttgaactttctccatgagaatcatatgaagttttac	16	mtr-MIR156d,gma-MIR156r,gma-MIR156h,gma-MIR156k,gma-MIR156n,gma-MIR156o,mdm-MIR156n,mdm-MIR156f,mdm-MIR156k,mes-MIR156e,csi-MIR156b,fve-MIR156e,bna-MIR156f,rco-MIR156b,vun-MIR156a,tcc-MIR156g,	gma-MIR156r	ttgttaattgcttttttctcttctagttatatggggttcgtgatcataatatgatgacaatcctaatgcataatattctttcgtattttatgcagagagagtgaaggatcaagcacatgcataagatagagcctgCTGACAGAAGATAGAGAGCATagctgaacat	gma-miR156r	CTGACAGAAGATAGAGAGCAT	5'	Diff	gp2b	.............(((((..(((((((...(((.......((((((.(((((((.(((((((....(((((.((.((.....)))))))))))))))).....))))..)))))))))....)))..)))))))...))))).	129	42.7	-32.6	0.5	24	34	20.5	22	36	29	25.4532	34.1106	19.6557	21.7626	34.6289	28.8177	middle
16	10	mtr-miR159a_L+1R-1	CTTTGGATTGAAGGGAGCTCT	21	NW_015787886.1	-	20011	20092	cagctgtccaaacctttgctttactatgccagaaagattggaatcaatcaacactacaaatCTTTGGATAGAAGGGAGCTCT	25	mtr-MIR159a,gma-MIR159e,gma-MIR159a,osa-MIR159b,osa-MIR159a,ath-MIR159a,ath-MIR159b,sbi-MIR159a,aly-MIR159b,aly-MIR159a,zma-MIR159f,zma-MIR159a,lus-MIR159b,lus-MIR159c,tae-MIR159b,aof-MIR159,bra-MIR159a,bna-MIR159,cas-MIR159c,cas-MIR159b,sof-MIR159b,sof-MIR159d,sof-MIR159a,far-MIR159,pvu-MIR159a,	mtr-MIR159a	ggggtggagcttcctttagtccaaatatggatcttgctatgttgatagagctgcttagctatgggtccctcaactctacccatcttgttctttgtggtagttttgtggcttccatatctagggagccttatcacctttagtttaatctttcTTTGGATTGAAGGGAGCTCTAcatcttgctct	mtr-miR159a	TTTGGATTGAAGGGAGCTCTA	3'	Diff	gp2b	...(((((((((.....((........))......(((((....))))).............)))))))))...........	68	40.2	-15.4	0.5	0	6.5	3.5	0	0	0	0	6.52114	3.35584	0	0	0	low
17	11	mtr-miR159a_L+1	CTTTGGATTGAAGGGAGCTCTA	22	NW_015803643.1	+	112983	113026	ctacagatCTTTGGATAGAAGGGAGCTCTActccatatttgctg	25	mtr-MIR159a,gma-MIR159e,gma-MIR159a,osa-MIR159b,osa-MIR159a,ath-MIR159a,ath-MIR159b,sbi-MIR159a,aly-MIR159a,aly-MIR159b,zma-MIR159f,zma-MIR159a,lus-MIR159c,lus-MIR159b,tae-MIR159b,aof-MIR159,bra-MIR159a,bna-MIR159,cas-MIR159c,cas-MIR159b,sof-MIR159b,sof-MIR159d,sof-MIR159a,far-MIR159,pvu-MIR159a,	mtr-MIR159a	ggggtggagcttcctttagtccaaatatggatcttgctatgttgatagagctgcttagctatgggtccctcaactctacccatcttgttctttgtggtagttttgtggcttccatatctagggagccttatcacctttagtttaatctttcTTTGGATTGAAGGGAGCTCTAcatcttgctct	mtr-miR159a	TTTGGATTGAAGGGAGCTCTA	5'	Diff	gp2b	...(((.....((((((((.(....))))).))))......)))	41	43.2	-9.2	0.5	358.5	335	264.5	317	271.5	310	380.207	336.089	253.606	313.579	261.16	308.051	middle
18	12	ath-miR159c_R+1_1ss20CA	TTTGGATTGAAGGGAGCTCATT	22	NW_015808310.1	-	22073	22136	ccaggcactcctgtttgagcttcatccTTTGGATTGAAGAGAGCTCATTcagaacaatgccact	8	ath-MIR159c,ath-MIR159b,aly-MIR159c,aly-MIR159b,lus-MIR159c,cas-MIR159a,cas-MIR159c,cas-MIR159b,	ath-MIR159c	gtgtaacagaaggagctcccttcctccaaaacgaagaggacaagatttgaggaactaaaatgcagaatctaagagttcatgtcttcctcatagagagtgcgcggtgttaaaagcttgaagaaagcacactttaaggggattgcacgacctcttagattctccctctttctctacatatcattctcttctcttcgTTTGGATTGAAGGGAGCTCCTtttcttcttc	ath-miR159c	TTTGGATTGAAGGGAGCTCCT	3'	Diff	gp2b	...((((...(((..((((((((((((...))).)))....))))))..))).....))))...	58	46.9	-20	0.7	0	0	6	0	7	2.5	0	0	5.75288	0	6.7334	2.48428	low
19	13	ath-miR159b-3p_R+2	TTTGGATTGAAGGGAGCTCTTCC	23	NW_015831606.1	-	11066	11100	TTTGGAGTGAAGGGAGCTCTTCCgaagaagaggaa	5	ath-MIR159b,aly-MIR159b,csi-MIR159a,lus-MIR159c,cas-MIR159c,	ath-MIR159b	ggaaGAGCTCCTTGAAGTTCAATGGagggtttagcagggtgaagtaaagctgctaagctatggatcccataagccttatcaaattcaatataattgatgataaggttttttttatggatgccatatctcaggagctttcacttacccctttaatggcttcactcttcTTTGGATTGAAGGGAGCTCTTcatctctc	ath-miR159b-3p	TTTGGATTGAAGGGAGCTCTT	5'	Diff	gp2b	................((((((....))))))...	16	48.6	-6.7	0.4	0	4	0	0	3	0	0	4.01301	0	0	2.88574	0	low
20	14	ppe-miR159_L+1	GTTTGGATTGAAGGGAGCTCTA	22	NW_015846361.1	-	208785	208823	tGTTTGGTTTGAAGGGAGCTCTAtagacagctctctgat	8	ppe-MIR159,mes-MIR159b,mes-MIR159a,vvi-MIR159c,cme-MIR159a,cpa-MIR159a,rco-MIR159,hbr-MIR159a,	ppe-MIR159	ggagcagagctccttgaagtccaatagaaggtcttgctgggtggattgagctgctgagctatggatcccacagccctatctcagatcatcagaggaataggcttgtggcttgcatatctcaggagctgcattacctgtgttagatctttgTTTGGATTGAAGGGAGCTCTAcacc	ppe-miR159	TTTGGATTGAAGGGAGCTCTA	5'	Diff	gp2b	............((((((((........))))))))...	24	43.6	-10.8	0.6	10	19	11	9	8.5	11.5	10.6055	19.0618	10.5469	8.90287	8.17627	11.4277	middle
21	15	lus-miR159b_R+2_1ss21CA	TTTGGATTGAAGGGAGCTCTATT	23	NW_015885254.1	+	30904	30978	TTTGGTTTGAAGGGAGCTCTATTgacagctctttgattgggataagtaattctcagaggttggttagaggttggt	1	lus-MIR159b,	lus-MIR159b	aagagagctcctttgggtccaaacagagggtgtggatagggtgagatggaagctgctgagctatggattccacaaccccacccttttgattattgatccggtgggttgtggctcgttttgcatatctcaggagcctccgttccctgttttcttctcttccctccTTTGGATTGAAGGGAGCTCTCtt	lus-miR159b	TTTGGATTGAAGGGAGCTCTC	5'	Diff	gp2b	.............((.(((((....((((.((((((...((((.....))))))))))))))..))))).))...	59	41.3	-16.9	0.5	322	241	327	306	332	257	341.497	241.784	313.532	302.698	319.356	255.384	middle
22	16	ptc-miR159a_1ss21AG	TTTGGATTGAAGGGAGCTCTG	21	NW_015890253.1	+	12160	12399	aagctgctgacctatggattcctcagtcctatctattatttgattggataggtttgtgggttgcatatgtcaggagcttcattaccctaagttggatcccttTTTGGATTGAAGGGAGCTCTAcattcatttgaccagatttgtattcttcttgtttttaatttcttttatgtttattagtagcgatctaatatctgatttttatatccaggtctttagatctgatcttcttttctattt	28	ptc-MIR159a,ptc-MIR159b,osa-MIR159b,osa-MIR159a,osa-MIR159c,bdi-MIR159b,bdi-MIR159a,sbi-MIR159a,zma-MIR159j,zma-MIR159k,zma-MIR159f,zma-MIR159b,zma-MIR159a,csi-MIR159a,lus-MIR159c,lus-MIR159b,tae-MIR159b,tae-MIR159a,fve-MIR159b,cpa-MIR159a,hvu-MIR159b,hvu-MIR159a,vca-MIR159,ahy-MIR159,sof-MIR159b,sof-MIR159d,sof-MIR159a,far-MIR159,	ptc-MIR159b	gattatggagtggagctccttgaagtccaatagaagctcctgctgggtagatcgagctgctgagctatgaatcccacagccctatcaccatcagtcattttgatgggcctgcggcttgcatatctcaggagctttattacctaatgttagatcttttTTTGGATTGAAGGGAGCTCTAaacctttga	ptc-miR159a	TTTGGATTGAAGGGAGCTCTA	5'	Diff	gp2b	(((((.(((((.((((...(((.((..((((((((.........))))))))..)).)))...)))).))))).))))).........((((..(((((((((.......)))))).((((((....(((..(((.(((..........))).))).............))).....))).)))........)))..)))).......((((((....))))))................	19	34.2	-57	0.7	57.5	61	75.5	65.5	63.5	41.5	60.9816	61.1983	72.3904	64.7931	61.0816	41.2391	middle
23	17	ptc-miR159a_1ss21AT	TTTGGATTGAAGGGAGCTCTT	21	NW_015900193.1	-	156354	156398	ttTTTGGATTGAAGGGAGCTCTAcattcatctctcttcatcttat	53	ptc-MIR159a,ptc-MIR159b,mtr-MIR159a,gma-MIR159e,gma-MIR159a,osa-MIR159f,osa-MIR159b,osa-MIR159a,osa-MIR159c,ath-MIR159a,ath-MIR159b,ath-MIR159c,bdi-MIR159b,bdi-MIR159a,sbi-MIR159a,aly-MIR159a,aly-MIR159b,aly-MIR159c,ppe-MIR159,mes-MIR159b,mes-MIR159a,zma-MIR159j,zma-MIR159k,zma-MIR159f,zma-MIR159b,zma-MIR159a,vvi-MIR159c,csi-MIR159a,lus-MIR159c,lus-MIR159b,tae-MIR159b,tae-MIR159a,cme-MIR159a,fve-…	ptc-MIR159b	gattatggagtggagctccttgaagtccaatagaagctcctgctgggtagatcgagctgctgagctatgaatcccacagccctatcaccatcagtcattttgatgggcctgcggcttgcatatctcaggagctttattacctaatgttagatcttttTTTGGATTGAAGGGAGCTCTAaacctttga	ptc-miR159a	TTTGGATTGAAGGGAGCTCTA	5'	Diff	gp2b	.....(((.(((((((((............))))))))))))...	37	35.6	-11.2	0.7	1583	1286.5	1359	1373.5	1311.5	1007.5	1678.85	1290.68	1303.03	1358.68	1261.55	1001.17	high
24	17	ptc-miR159a_1ss21AT	TTTGGATTGAAGGGAGCTCTT	21	NW_015946328.1	+	1380	1460	tactctaagttggatctcttTTTGGATTGAAGGGAGCTCTTcattaatttctcttcatcctttgacattaatttaagattt	13	ptc-MIR159a,ptc-MIR159b,ath-MIR159b,ath-MIR159c,bdi-MIR159a,aly-MIR159b,aly-MIR159c,csi-MIR159a,lus-MIR159c,lus-MIR159b,cas-MIR159c,cas-MIR159b,cas-MIR159a,	ptc-MIR159b	gattatggagtggagctccttgaagtccaatagaagctcctgctgggtagatcgagctgctgagctatgaatcccacagccctatcaccatcagtcattttgatgggcctgcggcttgcatatctcaggagctttattacctaatgttagatcttttTTTGGATTGAAGGGAGCTCTAaacctttga	ptc-miR159a	TTTGGATTGAAGGGAGCTCTA	5'	Diff	gp2b	...((((((((.(((.((.....(((.(((((((((............))))))))))))...)).))))))))).))...	75	30.9	-15.1	0.6	1583	1286.5	1359	1373.5	1311.5	1007.5	1678.85	1290.68	1303.03	1358.68	1261.55	1001.17	high
25	18	ptc-miR159a_R+1	TTTGGATTGAAGGGAGCTCTAA	22	NW_015911334.1	+	36965	37029	tTTTGGATTGAAGGGAGCTCTACattcatttgaccagatttgtattcttgttgtctttaatttct	9	ptc-MIR159a,ptc-MIR159b,osa-MIR159f,ath-MIR159c,aly-MIR159c,cas-MIR159a,aqc-MIR159,vca-MIR159,ahy-MIR159,	ptc-MIR159b	gattatggagtggagctccttgaagtccaatagaagctcctgctgggtagatcgagctgctgagctatgaatcccacagccctatcaccatcagtcattttgatgggcctgcggcttgcatatctcaggagctttattacctaatgttagatcttttTTTGGATTGAAGGGAGCTCTAaacctttga	ptc-miR159a	TTTGGATTGAAGGGAGCTCTA	5'	Diff	gp2b	.....((((((((..(((..((((.((.........))..)))).....)))..))))))))...	57	32.3	-9.3	0.4	364.5	332.5	362	331	327	274.5	386.57	333.581	347.09	327.428	314.546	272.774	middle
26	19	ptc-miR159d_R-1	CTTGGATTGAAGGGAGCTCC	20	NW_015917127.1	-	21223	21253	CTTGGACTGAAGGGAGCTCCcttttgccttt	14	ptc-MIR159d,mtr-MIR319c,mdm-MIR159a,mdm-MIR159c,mdm-MIR159b,sbi-MIR159b,zma-MIR159d,zma-MIR159c,vvi-MIR319g,csi-MIR159c,lus-MIR319b,cpa-MIR159b,sof-MIR159c,ctr-MIR319,	ptc-MIR159d	ttgtaaatttgggagctttctttggttcaaaatgaggaaagaaagtgggtatactcgtctgcttgttcatggatacctctgggttgcgcaggatatattagttagggctacagcttaagggtttgcatggccaaggagacgttgcctgccttctcctttcgtttCTTGGATTGAAGGGAGCTCCTacatgtatc	ptc-miR159d	CTTGGATTGAAGGGAGCTCCT	5'	Diff	gp2b	...((...((((((....))))))..))...	25	51.6	-10.7	0.7	134.5	167.5	132.5	140	145	145	142.644	168.045	127.043	138.489	139.478	144.089	middle
27	19	ptc-miR159d_R-1	CTTGGATTGAAGGGAGCTCC	20	NW_015948557.1	-	12767	12797	CTTGGACTGAAGGGAGCTCCcttttgccttt	9	ptc-MIR159d,mdm-MIR159a,mdm-MIR159c,mdm-MIR159b,sbi-MIR159b,zma-MIR159c,zma-MIR159d,cpa-MIR159b,sof-MIR159c,	ptc-MIR159d	ttgtaaatttgggagctttctttggttcaaaatgaggaaagaaagtgggtatactcgtctgcttgttcatggatacctctgggttgcgcaggatatattagttagggctacagcttaagggtttgcatggccaaggagacgttgcctgccttctcctttcgtttCTTGGATTGAAGGGAGCTCCTacatgtatc	ptc-miR159d	CTTGGATTGAAGGGAGCTCCT	5'	Diff	gp2b	...((...((((((....))))))..))...	25	51.6	-10.7	0.7	134.5	167.5	132.5	140	145	145	142.644	168.045	127.043	138.489	139.478	144.089	middle
28	20	htu-MIR160a-p5	TGCCTGGCTCCCTGTATGCCT	21	NW_015906741.1	-	23107	23129	TGCCTGGCTCCCTGTATGCCTCC	19	osa-MIR160d,osa-MIR160e,osa-MIR160b,osa-MIR160c,bdi-MIR160d,bdi-MIR160a,sbi-MIR160c,sbi-MIR160e,sbi-MIR160d,zma-MIR160e,zma-MIR160c,zma-MIR160f,zma-MIR160d,tae-MIR160,ata-MIR160b,ata-MIR160c,ata-MIR160a,htu-MIR160a,ttu-MIR160,	htu-MIR160a	gcaTGCCTGGCTCCCTGTATGCCtcctgcaggaaaacaactgctgggggtatgagggttgactgaaaaggacggtggaagggcaaaaccgtct	htu-MIR160a-p5	TGCCTGGCTCCCTGTATGCCt	5'	New	gp2b	.....(((.........)))...	15	65.2	-3.5	0.2	25.5	24	65.5	36.5	57.5	26.5	27.044	24.078	62.8022	36.1061	55.3101	26.3334	middle
28	21	osa-miR160a-5p_R+2_1ss21AT	TGCCTGGCTCCCTGTATGCCTCT	23	NW_015906741.1	-	23107	23129	TGCCTGGCTCCCTGTATGCCTCC	19	osa-MIR160d,osa-MIR160e,osa-MIR160b,osa-MIR160c,bdi-MIR160d,bdi-MIR160a,sbi-MIR160c,sbi-MIR160e,sbi-MIR160d,zma-MIR160e,zma-MIR160c,zma-MIR160f,zma-MIR160d,tae-MIR160,ata-MIR160b,ata-MIR160c,ata-MIR160a,htu-MIR160a,ttu-MIR160,	osa-MIR160c	ggaatgTGCCTGGCTCCCTGTATGCCActcatctagagcaacaaacttctgcgagaggttgcctatgatggatgGCGTGCACGGAGCCAAGCATAttcc	osa-miR160a-5p	TGCCTGGCTCCCTGTATGCCA	3'	Diff	gp2b	.....(((.........)))...	15	65.2	-3.5	0.2	0	0	0	5	0	0	0	0	0	4.94604	0	0	low
29	22	csi-MIR160c-p5_2ss18GT19CT	TGCCTGGCTCCCTGTATTTT	20	NW_015809621.1	+	7826	7975	cacaaagattTGCCTGGCTCCCTGTATTTTctaccgaagtaactgagtgcattggatttttaatccccaacacactccaatattctgtatctacaaacccatactgcccaattctcttaaactttctgggcagctttgccttgtcttttt	1	csi-MIR160c,	csi-MIR160c	tgatatatagtaTGCCTGGCTCCCTGTATGCTTtttgcaaagcccatcagaagattggtggtcttggcggataGCGTGCGAGGAGCCATGCATGctaaatttag	csi-MIR160c-p5	TGCCTGGCTCCCTGTATGCT	5'	New	gp2b	...((((((......(((....((((.....(((.(((......(((((..((((...........))))..))))).....))).)))..))))........(((((((................)))))))....)))..))))))..	145	40.7	-31.5	0.5	14	27	60	37	90	35	14.8477	27.0878	57.5288	36.6007	86.5723	34.78	middle
30	23	csi-miR160c-5p_R+1_1ss19CT	TGCCTGGCTCCCTGTATGTTTT	22	NW_015817738.1	-	51662	51699	TGCCTGGCTCCCTGTATGTATTattgacacataggtac	1	csi-MIR160c,	csi-MIR160c	tgatatatagtaTGCCTGGCTCCCTGTATGCTTtttgcaaagcccatcagaagattggtggtcttggcggataGCGTGCGAGGAGCCATGCATGctaaatttag	csi-miR160c-5p	TGCCTGGCTCCCTGTATGCTT	5'	Diff	gp2b	..........(((((.(((.......))).)))))...	25	44.7	-6.1	0.4	6	10	16	22	30.5	18	6.36329	10.0325	15.341	21.7626	29.3384	17.8868	middle
31	23	csi-miR160c-5p_R+1_1ss19CT	TGCCTGGCTCCCTGTATGTTTT	22	NW_015925683.1	-	18315	18354	ctTGCCTGGCTCCCTGTATGTGTTattggagtcccgttga	1	csi-MIR160c,	csi-MIR160c	tgatatatagtaTGCCTGGCTCCCTGTATGCTTtttgcaaagcccatcagaagattggtggtcttggcggataGCGTGCGAGGAGCCATGCATGctaaatttag	csi-miR160c-5p	TGCCTGGCTCCCTGTATGCTT	5'	Diff	gp2b	...((..((((((..(((.....))).))))))..))...	34	52.5	-8.9	0.4	6	10	16	22	30.5	18	6.36329	10.0325	15.341	21.7626	29.3384	17.8868	middle
32	24	bdi-miR160f_L+2	CATGCCTGGCTCCCTGTATGCC	22	NW_015849289.1	-	35876	35900	CATGCCTGGCTCCCTGTATGCCtgc	8	bdi-MIR160f,vvi-MIR160d,cme-MIR160c,aof-MIR160c,bna-MIR160b,bna-MIR160d,htu-MIR160a,far-MIR160,	bdi-MIR160f	cgggggctgcggggtggcggatgtcagtgtgcggccgtaggctggaccgcgggtgtttgctgttgcggagatccaccgaggacggagacggaccgaagtgcgcaTGCCTGGCTCCCTGTATGCCgcccgcg	bdi-miR160f	TGCCTGGCTCCCTGTATGCC	5'	Diff	gp2b	...((..(((.........))).))	22	64	-4.4	0.3	0	0	2.5	0	6.5	0	0	0	2.39703	0	6.25245	0	low
33	25	csi-miR160c-5p_R+1	TGCCTGGCTCCCTGTATGCTTT	22	NW_015854741.1	+	2695	2731	cttgtacaccaaaccTGCCTGGCTCCCTGTATCCTTT	1	csi-MIR160c,	csi-MIR160c	tgatatatagtaTGCCTGGCTCCCTGTATGCTTtttgcaaagcccatcagaagattggtggtcttggcggataGCGTGCGAGGAGCCATGCATGctaaatttag	csi-miR160c-5p	TGCCTGGCTCCCTGTATGCTT	3'	Diff	gp2b	...(((((.....((.....)).....))))).....	29	51.4	-3.5	0.2	7	12	9	13	19	18	7.42384	12.039	8.62931	12.8597	18.2764	17.8868	middle
34	26	csi-miR160c-5p_R-1_1ss19CT	TGCCTGGCTCCCTGTATGTT	20	NW_015857451.1	-	4435	4586	gctcttcttcataaggattggaacatggtaatggacaatgtgctctccagcagaacccaatgtacccgctgtagtttagagggttgcatgtgatttctagtgttgttctgcacaaattttTGCCTGGCTCCCTGTATGTGatgttgaagtaa	1	csi-MIR160c,	csi-MIR160c	tgatatatagtaTGCCTGGCTCCCTGTATGCTTtttgcaaagcccatcagaagattggtggtcttggcggataGCGTGCGAGGAGCCATGCATGctaaatttag	csi-miR160c-5p	TGCCTGGCTCCCTGTATGCTT	3'	Diff	gp2b	...((((..(((....((.(((.((.(((((.......(((((....((((((((..((((((((((.(((.....))).))).))))).))..)))...)))))....))))).....)))))))..)))..)).....)))..))))...	146	43.4	-37.1	0.6	0	0	2.5	2.5	11.5	2.5	0	0	2.39703	2.47302	11.062	2.48428	middle
35	26	csi-miR160c-5p_R-1_1ss19CT	TGCCTGGCTCCCTGTATGTT	20	NW_015888775.1	-	6459	6513	ttccgttgttcttcattTGCCTGGCTCCCTGTATGTGgggatatcctcaacgatt	1	csi-MIR160c,	csi-MIR160c	tgatatatagtaTGCCTGGCTCCCTGTATGCTTtttgcaaagcccatcagaagattggtggtcttggcggataGCGTGCGAGGAGCCATGCATGctaaatttag	csi-miR160c-5p	TGCCTGGCTCCCTGTATGCTT	5'	Diff	gp2b	...(((((.((..((..(((..((...)).)))..))..))......)))))...	49	47.3	-11	0.4	0	0	2.5	2.5	11.5	2.5	0	0	2.39703	2.47302	11.062	2.48428	middle
36	27	bdi-miR160f_R+1	TGCCTGGCTCCCTGTATGCCT	21	NW_015890334.1	+	91144	91245	atccacactgagcaTGCCTGGCTCCCTGTATGCCTgcaggaatgttgtccgatatacaacacaaagggctgctggggcttaaagggttgttgagaagtgaag	6	bdi-MIR160f,vvi-MIR160d,bna-MIR160d,bna-MIR160b,htu-MIR160a,far-MIR160,	bdi-MIR160f	cgggggctgcggggtggcggatgtcagtgtgcggccgtaggctggaccgcgggtgtttgctgttgcggagatccaccgaggacggagacggaccgaagtgcgcaTGCCTGGCTCCCTGTATGCCgcccgcg	bdi-miR160f	TGCCTGGCTCCCTGTATGCC	5'	Diff	gp2b	...(((.((.((((.(((((((.(((.(((.((((.......((((((.......))))))....))))))).))))))....)))))))).))..)))...	96	51	-32.3	0.6	25.5	24	65.5	36.5	57.5	26.5	27.044	24.078	62.8022	36.1061	55.3101	26.3334	middle
37	28	csi-miR160c-5p_R-1	TGCCTGGCTCCCTGTATGCT	20	NW_015896671.1	-	131	158	tgagcaTGCCTGGCTCCCTGTATGCCtg	4	csi-MIR160c,cme-MIR160c,aof-MIR160c,htu-MIR160a,	csi-MIR160c	tgatatatagtaTGCCTGGCTCCCTGTATGCTTtttgcaaagcccatcagaagattggtggtcttggcggataGCGTGCGAGGAGCCATGCATGctaaatttag	csi-miR160c-5p	TGCCTGGCTCCCTGTATGCTT	3'	Diff	gp2b	...((((((..((...)).))))))...	22	60.7	-7.4	0.4	13.5	24	32	15	67.5	38.5	14.3174	24.078	30.682	14.8381	64.9292	38.258	middle
38	28	csi-miR160c-5p_R-1	TGCCTGGCTCCCTGTATGCT	20	NW_015907849.1	-	2355	2382	tgagcaTGCCTGGCTCCCTGTATGCCtg	1	csi-MIR160c,	csi-MIR160c	tgatatatagtaTGCCTGGCTCCCTGTATGCTTtttgcaaagcccatcagaagattggtggtcttggcggataGCGTGCGAGGAGCCATGCATGctaaatttag	csi-miR160c-5p	TGCCTGGCTCCCTGTATGCTT	3'	Diff	gp2b	...((((((..((...)).))))))...	22	60.7	-7.4	0.4	13.5	24	32	15	67.5	38.5	14.3174	24.078	30.682	14.8381	64.9292	38.258	middle
39	29	cme-MIR160c-p5_2ss13AG17AG	AGCCATGCATGTGTAAGT	18	NW_015947041.1	+	38702	38833	AGCCATGCATGTGTAAGTatgaaaacattcagaccgtgaaactgcgaatggctcattaaattagttatagtttgtttgatggtatctactgctcggataaccgtagtagttctatagctaatacttgcaaca	1	cme-MIR160c,	cme-MIR160c	tcatcgtaaTGCCTGGCTCCCTGTATGCCAtttgcaaagcccatcatctaaaaataggtggccttctcgaatggcatgcaaggagccatgcatgtataaatt	cme-MIR160c-p5	agccatgcatgtataaat	5'	New	gp2b	.....((((.((((.(((..............(((((.((((.((..((..((.........))..)).))..)))).)))))....(((((((((....))).))))))......))).)))).))))...	124	37.1	-31.3	0.6	5.5	5	0	5	6	0	5.83302	5.01626	0	4.94604	5.77149	0	low
40	29	cme-MIR160c-p5_2ss13AG17AG	AGCCATGCATGTGTAAGT	18	NW_015952654.1	+	19908	19966	ttaAGCCATGCATGTGTAAGTatgaacaacttcagactgtgaaactgcgaaaggctcat	1	cme-MIR160c,	cme-MIR160c	tcatcgtaaTGCCTGGCTCCCTGTATGCCAtttgcaaagcccatcatctaaaaataggtggccttctcgaatggcatgcaaggagccatgcatgtataaatt	cme-MIR160c-p5	agccatgcatgtataaat	5'	New	gp2b	...((((.((((.((...(((.((((....)))).))).....))))))...))))...	53	40.7	-13.1	0.5	5.5	5	0	5	6	0	5.83302	5.01626	0	4.94604	5.77149	0	low
41	30	ptc-miR164a_R+3	TGGAGAAGCAGGGCACGTGCATTT	24	NW_015821657.1	+	8434	8577	TGGAGAAGCAGGGCACGTGCATTActaactcatgcacaagaattgtcagtgatcagttcgaaaagttttatggctttcatctgacatcataattcatagtaccattaaagtacttcctagcatagtggaaaaaataatgtgttt	5	ptc-MIR164b,mdm-MIR164f,mdm-MIR164e,ppe-MIR164a,fve-MIR164b,	ptc-MIR164b	gtgagcaagaTGGAGAAGCAGGGCACGTGCActactaactcatgcacacagagagggagacgcatttcttgctggagttacgagttacgactcttacctactattgattttgttagctccagtgagttagttattcatgtgcctgtcttcctcatcatgatc	ptc-miR164a	TGGAGAAGCAGGGCACGTGCA	5'	Diff	gp2b	............((((((.........(((.((((....(((((((..(((.((((...((((.((......))))))..))))))).)))))))..(((((.......))))).....)))))))..........))))))..	130	36.1	-28.5	0.5	0	2.5	0	4	0	0	0	2.50813	0	3.95683	0	0	low
42	30	ptc-miR164a_R+3	TGGAGAAGCAGGGCACGTGCATTT	24	NW_015913691.1	-	62074	62177	atatctcgtctttcagaattctccctatatgtgaactgctaaaaatatgcagctatgaaaaaggtgagtggtgatcaagaTGGAGAAGCAGGGCACGTGCATTA	5	ptc-MIR164b,mdm-MIR164f,mdm-MIR164e,ppe-MIR164a,fve-MIR164b,	ptc-MIR164b	gtgagcaagaTGGAGAAGCAGGGCACGTGCActactaactcatgcacacagagagggagacgcatttcttgctggagttacgagttacgactcttacctactattgattttgttagctccagtgagttagttattcatgtgcctgtcttcctcatcatgatc	ptc-miR164a	TGGAGAAGCAGGGCACGTGCA	3'	Diff	gp2b	...((((((((((((..((((..(((.........((((.........)))).........))).))))..)))..)))))).))).(((.......)))....	83	40.4	-20.3	0.5	0	2.5	0	4	0	0	0	2.50813	0	3.95683	0	0	low
43	31	lus-MIR164c-p3	CATGTGCCCATCTTCCCCATC	21	NW_015914045.1	-	155665	155715	aaatgagttagttcttCATGTGCCCATCTTCCCCATCacgaccactcaacc	3	lus-MIR164c,lus-MIR164b,lus-MIR164a,	lus-MIR164c	acaggtgggcgtgagcatgaTGGAGAAGCAGGGCACGTGCAttactaactcgtgggttttgctccggatcgagttagtggttcatgtgcccatcttccccatcgtgaaaccgttgcactttactctgt	lus-MIR164c-p3	catgtgcccatcttccccatc	3'	New	gp2b	...(((((..(((....(((.............)))...))).)))))...	45	47.1	-2.6	0.1	5	7.5	10.5	4.5	5	17.5	5.30275	7.52439	10.0675	4.45144	4.80957	17.39	middle
44	32	osa-miR164c_R+1_1ss21AT	TGGAGAAGCAGGGTACGTGCTC	22	NW_015914045.1	-	156111	156178	gtggcatgagaaggtgagtgttgaacaagaTGGAGAAGCAGGGTACGTGCTCtactaactcatgcatt	8	osa-MIR164c,osa-MIR164d,bdi-MIR164c,sbi-MIR164b,zma-MIR164f,cme-MIR164a,ata-MIR164a,cca-MIR164,	osa-MIR164c	aggttcttgtTGGAGAAGCAGGGTACGTGCAaaatgcacaccggttggtcgagctaattaacaagctctgacgaccatggtgatcgaatgcacgtgctccccttctccaccatggcctt	osa-miR164c	TGGAGAAGCAGGGTACGTGCA	3'	Diff	gp2b	...(((((((..((((((..(.(.((....((......))..)).))..))).)))..)))))))...	62	47.1	-18.7	0.6	71	59	66	45	69	74.5	75.299	59.1918	63.2816	44.5144	66.3721	74.0317	middle
45	32	osa-miR164c_R+1_1ss21AT	TGGAGAAGCAGGGTACGTGCTC	22	NW_015950120.1	+	27957	28073	ccccacgtttccaaagtttcaaatatataaacccttaggaaaaagatgcagcctctcagaatgtggaatcatgagaaggtgagtgttgaacaagaTGGAGAAGCAGGGTACGTGCTT	8	osa-MIR164c,osa-MIR164d,bdi-MIR164c,sbi-MIR164b,zma-MIR164f,cme-MIR164a,ata-MIR164a,cca-MIR164,	osa-MIR164c	aggttcttgtTGGAGAAGCAGGGTACGTGCAaaatgcacaccggttggtcgagctaattaacaagctctgacgaccatggtgatcgaatgcacgtgctccccttctccaccatggcctt	osa-miR164c	TGGAGAAGCAGGGTACGTGCA	3'	Diff	gp2b	...(((((..((...(((((...........((....)).....((..(.((((((((..((.....))..))))).)))..)..))............))))).))..)))))...	111	42.7	-25.3	0.5	71	59	66	45	69	74.5	75.299	59.1918	63.2816	44.5144	66.3721	74.0317	middle
46	33	cme-MIR164d-p3	CATGTGCCCCTCTTCTCCATC	21	NW_015943302.1	+	17798	17863	tttgcacattgtatgtgattctctgtgataaatgagttactttttCATGTGCCCCTCTTCTCCATC	1	cme-MIR164d,	cme-MIR164d	ccgatcaggaTGGAGAAGCAGGGCACGTGCAttactcactcatgtaactccacacccacgtggctgcctccgagtgggttgttcatgtgcccctcttctccatcctgaccac	cme-MIR164d-p3	catgtgcccctcttctccatc	3'	New	gp2b	...((((((.....(((((((............)))))))......))))))..............	49	37.9	-12.8	0.5	28	48	35	53	37	34	29.6954	48.1561	33.5584	52.428	35.5908	33.7863	middle
47	34	lus-MIR164c-p5	CATGTGCCCATCTTCCCCATC	21	NW_015950120.1	+	28606	28638	tCATGTGCCCATCTTCCCCATCatgaccactca	3	lus-MIR164c,lus-MIR164b,lus-MIR164a,	lus-MIR164c	acaggtgggcgtgagcatgaTGGAGAAGCAGGGCACGTGCAttactaactcgtgggttttgctccggatcgagttagtggttcatgtgcccatcttccccatcgtgaaaccgttgcactttactctgt	lus-MIR164c-p5	catgtgcccatcttccccatc	5'	New	gp2b	(((((((...........)).))))).......	26	51.5	-2.3	0.1	5	7.5	10.5	4.5	5	17.5	5.30275	7.52439	10.0675	4.45144	4.80957	17.39	middle
48	35	ath-miR165a-3p_R-1_1ss19CT	TCGGACCAGGCTTCATCCTC	20	NW_015888823.1	-	139361	139398	gcagaagcttttggacagACGGACCAGGCTTCATCCTC	9	ath-MIR165b,ath-MIR165a,aly-MIR165b,aly-MIR165a,lus-MIR166b,cme-MIR166i,aof-MIR166c,bna-MIR166f,cas-MIR165a,	ath-MIR165a	gttgaggGGAATGTTGTCTGGATCGAGGatattatagatatatacatgtgtatgttaatgattcaagtgatcatagagagtatccTCGGACCAGGCTTCATCCCCCccaac	ath-miR165a-3p	TCGGACCAGGCTTCATCCCCC	3'	Diff	gp2b	...((((((..(((.........)))))))))......	29	55.3	-8.9	0.4	0	8	0	0	6	0	0	8.02601	0	0	5.77149	0	low
49	36	sly-miR166c-5p_2ss3GA10TG	GGAATGTTGGCTGGCTCGACA	21	NW_015872848.1	-	106374	106549	gaagagtaacacatggtgaagaaaaagatagatatggtgagtttgaggGGAATGTTGGCTGGCTCGACGcaaccacccattctaattataactgggaagggtgaaggcaTCGGACCAGGCTTCATTCCTCtcaaaccatattctgcccttaattaccacccattgtgtgtatccaa	59	stu-MIR166b,sly-MIR166c,ptc-MIR166q,ptc-MIR166n,ptc-MIR166o,ptc-MIR166d,ptc-MIR166f,ptc-MIR166p,mtr-MIR166c,mtr-MIR166f,mtr-MIR166b,mtr-MIR166e,gma-MIR166k,gma-MIR166p,gma-MIR166e,gma-MIR166m,osa-MIR166h,osa-MIR166g,osa-MIR166j,osa-MIR166i,osa-MIR166e,ath-MIR166a,bdi-MIR166f,bdi-MIR166j,sbi-MIR166k,sbi-MIR166f,sbi-MIR166b,mes-MIR166j,zma-MIR166m,zma-MIR166l,zma-MIR166h,zma-MIR166f,vvi-MIR166b,vvi…	sly-MIR166c	tgtgtgtggtgagtttgaggGGGATGTTGTCTGGCTCGACAcaattactctattgtatgtatttagttattcgttatcaagattgatgtcgataacgaataaattaaacacatatatacaagatgtaaaaagggagtaaaggcgTCGGACCAGGCTTCATTCCTCtcaaacaatattctacttttaca	sly-miR166c-5p	GGGATGTTGTCTGGCTCGACA	5'	Diff	gp2b	...((...(((((.((((..((..(((.((((....(((.((((((((((((((..((((((..(((.((...(((((.(((((........))))).)))))...)).)))..))).))).)))))))))))))))))..))))..)))..))..))))...)))))...))...	170	44.9	-67.6	0.9	222	368	355	226	256	139	235.442	369.197	340.378	223.561	246.25	138.126	middle
49	37	ptc-miR166n_2ss1TA21TC	ACGGACCAGGCTTCATTCCTC	21	NW_015872848.1	-	106374	106549	gaagagtaacacatggtgaagaaaaagatagatatggtgagtttgaggGGAATGTTGGCTGGCTCGACGcaaccacccattctaattataactgggaagggtgaaggcaTCGGACCAGGCTTCATTCCTCtcaaaccatattctgcccttaattaccacccattgtgtgtatccaa	59	stu-MIR166b,sly-MIR166c,ptc-MIR166q,ptc-MIR166n,ptc-MIR166o,ptc-MIR166d,ptc-MIR166f,ptc-MIR166p,mtr-MIR166c,mtr-MIR166f,mtr-MIR166b,mtr-MIR166e,gma-MIR166k,gma-MIR166p,gma-MIR166e,gma-MIR166m,osa-MIR166h,osa-MIR166g,osa-MIR166j,osa-MIR166i,osa-MIR166e,ath-MIR166a,bdi-MIR166f,bdi-MIR166j,sbi-MIR166k,sbi-MIR166f,sbi-MIR166b,mes-MIR166j,zma-MIR166m,zma-MIR166l,zma-MIR166h,zma-MIR166f,vvi-MIR166b,vvi…	ptc-MIR166o	aaggggtgtttggaatgaagtttgatccaagatccttgtctctcccgttcatttagtaatgttactgctaggtttcgctatgtattgatcagtgtatacacagcagctacgagctaggccttgtgtttcagattttagcttcaatatagagtgagagtgatagagtttgattcaagatccatctcatgtgtgctagctagcttttaaatttttaatcatatccctacttcctgttaattcttaggttttatcttgcaagttattatatttagtaaacatcatgaactgatcTCGGACCAGGCTTCATTCCTTacaccgaa	ptc-miR166n	TCGGACCAGGCTTCATTCCTT	3'	Diff	gp2b	...((...(((((.((((..((..(((.((((....(((.((((((((((((((..((((((..(((.((...(((((.(((((........))))).)))))...)).)))..))).))).)))))))))))))))))..))))..)))..))..))))...)))))...))...	170	44.9	-67.6	0.9	1130	920.5	1129.5	1352.5	959	1126	1198.42	923.493	1082.98	1337.9	922.476	1118.92	middle
50	38	gma-miR166h-5p_R+1	GGAATGTTGTTTGGCTCGAGGT	22	NW_015900715.1	-	97676	97822	ctattgtggGGAATGTTGTTTGGCTCGAGGAttcttcaatcttgatcaaattctttctattttttatagatctgcatattaatatagatctataatattgaatcatgattttggtgtcgTCGGACCAGGCTTCATTCCCCtcaaaga	24	mtr-MIR166b,gma-MIR166j,gma-MIR166h,ath-MIR166a,ath-MIR166g,ath-MIR165a,ath-MIR165b,gra-MIR166d,gra-MIR166c,aly-MIR166g,aly-MIR165a,aly-MIR165b,mes-MIR166h,csi-MIR166b,lus-MIR166b,cme-MIR166g,aof-MIR166c,bna-MIR166c,bna-MIR166f,cas-MIR166f,cas-MIR165a,cpa-MIR166d,crt-MIR166a,tcc-MIR166b,	gma-MIR166h	tggggatgatgGGAATGTTGTTTGGCTCGAGGtaactgcatggtcttaattttgttcatcttttgaagctttaatttatttatgggtttcaatcttttttgatcccttgaaacagaaaaagctttaaaggttggattttgaggctatccctttatgtgaTCTCGGACCAGGCTTCATTCCcgtcaacctt	gma-miR166h-5p	GGAATGTTGTTTGGCTCGAGG	5'	Diff	gp2b	((.(((.((((((((..(..(((..(((.((..((..((((.(((((((..............((((((((((..((....))..))))))))))..)))).))).))))..))..)).)))..)))..)..)))))))).))))).	146	34.7	-50	1	0	6	9	6	0	0	0	6.01951	8.62931	5.93525	0	0	low
50	39	mtr-miR166b_2ss20TC21AG	TCGGACCAGGCTTCATTCCCG	21	NW_015900715.1	-	97676	97822	ctattgtggGGAATGTTGTTTGGCTCGAGGAttcttcaatcttgatcaaattctttctattttttatagatctgcatattaatatagatctataatattgaatcatgattttggtgtcgTCGGACCAGGCTTCATTCCCCtcaaaga	24	mtr-MIR166b,gma-MIR166j,gma-MIR166h,ath-MIR166a,ath-MIR166g,ath-MIR165a,ath-MIR165b,gra-MIR166d,gra-MIR166c,aly-MIR166g,aly-MIR165a,aly-MIR165b,mes-MIR166h,csi-MIR166b,lus-MIR166b,cme-MIR166g,aof-MIR166c,bna-MIR166c,bna-MIR166f,cas-MIR166f,cas-MIR165a,cpa-MIR166d,crt-MIR166a,tcc-MIR166b,	mtr-MIR166b	gttgatgggaatgttgtttggctcgaggtaataactaactcaatttctttgtctttgaaagcttttctttgtttcactctttttgattcttagaaagttgaaactaagtgagctttaaaggtttgattttgatgtgtgattatcTCGGACCAGGCTTCATTCCTAccaac	mtr-miR166b	TCGGACCAGGCTTCATTCCTA	3'	Diff	gp2b	((.(((.((((((((..(..(((..(((.((..((..((((.(((((((..............((((((((((..((....))..))))))))))..)))).))).))))..))..)).)))..)))..)..)))))))).))))).	146	34.7	-50	1	24	13	13.5	15.5	21.5	17.5	25.4532	13.0423	12.944	15.3327	20.6812	17.39	middle
51	40	ptc-miR166a_L+2R-1	CTTCGGACCAGGCTTCATTCCC	22	NW_015787920.1	-	37458	37490	catgagtgaTTTCGGACCAGGCTTCATTCCCct	19	ptc-MIR166d,ptc-MIR166f,mtr-MIR166e,gma-MIR166e,gma-MIR166r,osa-MIR166j,osa-MIR166m,ath-MIR166a,gra-MIR166d,sbi-MIR166b,zma-MIR166h,zma-MIR166f,vvi-MIR166f,csi-MIR166f,lus-MIR166h,lus-MIR166j,cme-MIR166h,cpa-MIR166e,crt-MIR166b,	ptc-MIR166f	ggtgtgttgaggggaatgttggctggctcgaagcttaagcaaagagtttcctaacatgaaacaactgttaaggctTCGGACCAGGCTTCATTCCCCtcaaacata	ptc-miR166a	TCGGACCAGGCTTCATTCCCC	3'	Diff	gp2b	...((((((..((......))..))))))....	26	51.5	-6.6	0.4	15	14	7	18.5	15	7.5	15.9082	14.0455	6.71169	18.3004	14.4287	7.45285	middle
52	41	stu-miR166b_1ss1TA	ACGGACCAGGCTTCATTCCTC	21	NW_015795345.1	-	33278	33314	tttggagtgatcTCGGACCAGGCTTCATTCCTCacac	51	stu-MIR166b,sly-MIR166c,ptc-MIR166m,ptc-MIR166q,ptc-MIR166n,ptc-MIR166o,mtr-MIR166c,mtr-MIR166f,mtr-MIR166b,gma-MIR166k,gma-MIR166m,osa-MIR166h,osa-MIR166g,osa-MIR166j,osa-MIR166i,ath-MIR165a,ath-MIR165b,bdi-MIR166f,bdi-MIR166j,bdi-MIR166a,sbi-MIR166k,sbi-MIR166f,aly-MIR165a,aly-MIR165b,mes-MIR166j,zma-MIR166m,zma-MIR166l,vvi-MIR166a,vvi-MIR166b,csi-MIR166j,lus-MIR166e,lus-MIR166f,lus-MIR166b,cme…	stu-MIR166b	ggaatgttgtttggttcgaaatcattcaacaaattaaagtccatctcgatgatcaatgaattgaatgattTCGGACCAGGCTTCATTCCTC	stu-miR166b	TCGGACCAGGCTTCATTCCTC	3'	Diff	gp2b	...(((((((..((......))..)))))))......	28	51.4	-10.3	0.5	1130	920.5	1129.5	1352.5	959	1126	1198.42	923.493	1082.98	1337.9	922.476	1118.92	middle
53	42	stu-miR166b	TCGGACCAGGCTTCATTCCTC	21	NW_015801334.1	+	2326	2362	tttggagtgatcTCGGACCAGGCTTCATTCCTCacac	35	stu-MIR166b,sly-MIR166c,ptc-MIR166q,ptc-MIR166n,ptc-MIR166o,mtr-MIR166b,mtr-MIR166c,mtr-MIR166f,gma-MIR166k,osa-MIR166h,osa-MIR166g,osa-MIR166j,bdi-MIR166f,bdi-MIR166a,sbi-MIR166k,sbi-MIR166f,mes-MIR166j,zma-MIR166m,zma-MIR166l,vvi-MIR166a,vvi-MIR166b,csi-MIR166j,lus-MIR166f,lus-MIR166e,cme-MIR166e,aof-MIR166a,ata-MIR166b,hvu-MIR166a,aqc-MIR166c,aqc-MIR166a,aqc-MIR166d,hbr-MIR166a,ssl-MIR166a,dpr…	stu-MIR166b	ggaatgttgtttggttcgaaatcattcaacaaattaaagtccatctcgatgatcaatgaattgaatgattTCGGACCAGGCTTCATTCCTC	stu-miR166b	TCGGACCAGGCTTCATTCCTC	3'	Yes	gp2b	...(((((((..((......))..)))))))......	28	51.4	-10.3	0.5	100079	89374.5	110038	119408	99506	95005	106139	89665.1	105506	118119	95716.3	94407.8	high
54	42	stu-miR166b	TCGGACCAGGCTTCATTCCTC	21	NW_015900155.1	+	119502	119545	taatgggagtgaaggggTCGGACCAGGCTTCATTCCTCtcaaac	33	stu-MIR166b,sly-MIR166c,ptc-MIR166q,ptc-MIR166n,ptc-MIR166o,mtr-MIR166c,mtr-MIR166f,mtr-MIR166b,gma-MIR166k,osa-MIR166h,osa-MIR166g,bdi-MIR166f,bdi-MIR166j,sbi-MIR166k,sbi-MIR166f,mes-MIR166j,zma-MIR166m,zma-MIR166l,vvi-MIR166b,vvi-MIR166a,csi-MIR166j,lus-MIR166e,lus-MIR166f,cme-MIR166e,aof-MIR166a,ata-MIR166c,aqc-MIR166a,aqc-MIR166d,aqc-MIR166c,hbr-MIR166a,ssl-MIR166a,dpr-MIR166a,tcc-MIR166c,	stu-MIR166b	ggaatgttgtttggttcgaaatcattcaacaaattaaagtccatctcgatgatcaatgaattgaatgattTCGGACCAGGCTTCATTCCTC	stu-miR166b	TCGGACCAGGCTTCATTCCTC	3'	Yes	gp2b	...((((((.((((..(((......)))..).)))))))))...	38	52.3	-16.5	0.7	100079	89374.5	110038	119408	99506	95005	106139	89665.1	105506	118119	95716.3	94407.8	high
55	43	stu-miR166b_R+1	TCGGACCAGGCTTCATTCCTCT	22	NW_015809709.1	-	4076	4115	aatgggagtgaaggggTCGGACCAGGCTTCATTCCTCTca	47	stu-MIR166b,sly-MIR166c,ptc-MIR166q,ptc-MIR166n,ptc-MIR166o,ptc-MIR166p,mtr-MIR166c,mtr-MIR166f,mtr-MIR166b,gma-MIR166k,gma-MIR166p,osa-MIR166h,osa-MIR166g,osa-MIR166i,ath-MIR165a,ath-MIR165b,bdi-MIR166f,bdi-MIR166j,sbi-MIR166k,sbi-MIR166f,aly-MIR165a,aly-MIR165b,mes-MIR166j,zma-MIR166m,zma-MIR166l,vvi-MIR166b,vvi-MIR166a,csi-MIR166d,csi-MIR166h,lus-MIR166e,lus-MIR166f,lus-MIR166b,cme-MIR166e,aof…	stu-MIR166b	ggaatgttgtttggttcgaaatcattcaacaaattaaagtccatctcgatgatcaatgaattgaatgattTCGGACCAGGCTTCATTCCTC	stu-miR166b	TCGGACCAGGCTTCATTCCTC	3'	Diff	gp2b	..((((((.((((..(((......)))..).)))))))))	38	55	-16	0.7	548	494.5	571.5	570.5	538.5	503	581.181	496.108	547.961	564.343	517.991	499.838	middle
56	44	aof-MIR166b-p5_2ss6GC17TG	AAGAACGAAAGTTGGGGG	18	NW_015814943.1	+	8438	8575	AAGAACGAAAGTTGGGGGctcgaagacgatcagataccgtcctagtctcaaccataaacgatgccgaccagggatcggcggatgttgcttttaggactccgccggcaccttatgagaaatcaaagtttttgggttccg	1	aof-MIR166b,	aof-MIR166b	tgaagaaggaaagttgggtgtttggaatgaagtttgatccaagatcttttcgccattgatcttgttttcagtcccatatatattttaaaaaaaagataccggggtaagttttattccaatattttagggccagaTCTCGGACCAGGCTTCATTCTtcacaccttactttttattgcaaat	aof-MIR166b-p5	aagaaggaaagttgggtg	5'	New	gp2b	...(((....))).((..(((((((((...........(((...(((............)))...))).(((..((((((((.(((........)))))))))))..)))..(((....)))..)))))))))..)).	123	50.7	-46.1	0.7	25	17	14.5	6.5	7.5	7	26.5137	17.0553	13.9028	6.42985	7.21436	6.956	middle
57	45	mtr-miR166a_1ss21CA	TCGGACCAGGCTTCATTCCCA	21	NW_015819770.1	-	13332	13474	tgTCGGACCAGGCTTCATTCCCCccaattgttacttcctctcttgacaaaaatcaaagctttgaaatgagacgagttttggcttctgaaaaaggtaagttttatttataagatcttgatatatatgagacgagttttagcttt	10	mtr-MIR166a,gma-MIR166d,gma-MIR166f,gma-MIR166m,ath-MIR166c,mdm-MIR166f,gra-MIR166d,aly-MIR166c,bna-MIR166c,cas-MIR166a,	mtr-MIR166a	cagacatacgaaggagttcaggggaatggtgtctgattcgagaccattcgtcacaagtaaacagtagccttgagaatgatcTCGGACCAGGCTTCATTCCCCctagctcatagtatcatgc	mtr-miR166a	TCGGACCAGGCTTCATTCCCC	5'	Diff	gp2b	.........(((((..((((.......((((((..........))))))..(((((..(((..(((((((((...(((..(...)..))).......)))))))))..)))...)))))...........))))...))))).	133	35.7	-19	0.4	627.5	535	952.5	820.5	1494	284.5	665.495	536.74	913.269	811.645	1437.1	282.712	middle
58	45	mtr-miR166a_1ss21CA	TCGGACCAGGCTTCATTCCCA	21	NW_015887937.1	-	46801	46898	tgTCGGACCAGGCTTCATTCCCCccaattgctacttcctctctggactaaaatcaaatctttgacatgagacgagttttggcttatgaaaatggtaag	11	mtr-MIR166a,gma-MIR166d,gma-MIR166f,gma-MIR166m,ath-MIR166c,mdm-MIR166f,gra-MIR166d,aly-MIR166c,cme-MIR166i,bna-MIR166c,cas-MIR166a,	mtr-MIR166a	cagacatacgaaggagttcaggggaatggtgtctgattcgagaccattcgtcacaagtaaacagtagccttgagaatgatcTCGGACCAGGCTTCATTCCCCctagctcatagtatcatgc	mtr-miR166a	TCGGACCAGGCTTCATTCCCC	5'	Diff	gp2b	......((((...(((((.....((((..(((...(((.....)))...........((((......))))..))).))))...)))))..))))...	89	42.9	-16.6	0.4	627.5	535	952.5	820.5	1494	284.5	665.495	536.74	913.269	811.645	1437.1	282.712	middle
59	46	stu-miR166a-5p_L-1R+1	GAATGTTGTCTGGCTCGAGGA	21	NW_015822262.1	+	7722	7842	taaaaagataagagacagagaggaaactacacaaataagcaacaaaaatacaactcctaacaatcaagaaagggagcttttctattgtgggGAATGTTGTCTGGCTCGAGGAatctttaat	20	stu-MIR166a,ptc-MIR166j,ptc-MIR166k,ptc-MIR166c,mtr-MIR166g,gma-MIR166a,gma-MIR166c,mdm-MIR166a,mdm-MIR166g,aly-MIR166a,ppe-MIR166d,mes-MIR166d,vvi-MIR166c,vvi-MIR166e,csi-MIR166e,cme-MIR166b,cme-MIR166f,fve-MIR166c,cpa-MIR166a,rco-MIR166e,	stu-MIR166a	GGAATGTTGTCTGGCTCGAGGaatcaaattctttattactcatagatctgtatattgtttatagatctataatgtttttgacgtcgTCGGACCAGGCTTCATTCCCC	stu-miR166a-5p	GGAATGTTGTCTGGCTCGAGG	3'	Diff	gp2b	...((((((..(((.(((..((....)).....................((((((((..(((((..(((((((...))))))))))))..)))..)))))))).))).....))))))...	115	35.5	-27.1	0.6	0	7.5	6.5	7	16	9.5	0	7.52439	6.23228	6.92446	15.3906	9.44028	middle
60	46	stu-miR166a-5p_L-1R+1	GAATGTTGTCTGGCTCGAGGA	21	NW_015853439.1	-	26177	26312	gggggataaaaggataagagagggacagagagaaaactacaccaataattttttttaaaaaaactcctaataatcaagaaagggagcttttctattgtgggGAATGTTGTCTGGCTCGAGGAatttttaatcttga	20	stu-MIR166a,ptc-MIR166j,ptc-MIR166k,ptc-MIR166c,mtr-MIR166g,gma-MIR166a,gma-MIR166c,mdm-MIR166a,mdm-MIR166g,aly-MIR166a,ppe-MIR166d,mes-MIR166d,vvi-MIR166c,vvi-MIR166e,csi-MIR166e,cme-MIR166f,cme-MIR166b,fve-MIR166c,cpa-MIR166a,rco-MIR166e,	stu-MIR166a	GGAATGTTGTCTGGCTCGAGGaatcaaattctttattactcatagatctgtatattgtttatagatctataatgtttttgacgtcgTCGGACCAGGCTTCATTCCCC	stu-miR166a-5p	GGAATGTTGTCTGGCTCGAGG	3'	Diff	gp2b	...(((((((((.....(((..(((((.((((((((.((......)).))))))))........(((..(((((..(((((((...))))))))))))..)))....)))))..)))......)))))).)))...	130	35.3	-25.3	0.5	0	7.5	6.5	7	16	9.5	0	7.52439	6.23228	6.92446	15.3906	9.44028	middle
61	47	stu-miR166b_1ss4GA	TCGAACCAGGCTTCATTCCTC	21	NW_015826711.1	+	1876	2010	tgtctggaatccattgtgacacctttgagctgtagatgactcgccacatgaagtttctgcttctctccacccatTCGAACCAGACTTCATTCCTCgtaattatttttgtgatgtcataagatttgaacccagctg	24	stu-MIR166b,sly-MIR166c,mtr-MIR166c,mtr-MIR166f,gma-MIR166k,osa-MIR166e,osa-MIR166h,osa-MIR166g,bdi-MIR166f,sbi-MIR166k,sbi-MIR166f,mes-MIR166j,zma-MIR166m,zma-MIR166l,vvi-MIR166b,lus-MIR166e,cme-MIR166e,aof-MIR166a,aqc-MIR166a,aqc-MIR166d,hbr-MIR166a,ssl-MIR166a,dpr-MIR166a,tcc-MIR166c,	stu-MIR166b	ggaatgttgtttggttcgaaatcattcaacaaattaaagtccatctcgatgatcaatgaattgaatgattTCGGACCAGGCTTCATTCCTC	stu-miR166b	TCGGACCAGGCTTCATTCCTC	3'	Diff	gp2b	.(.((((..((..((((((((.......((...((((((..((....((((((..((((.(((.............))).))))))))))....))...))))))..))..)))))))).....))..)))))..	132	43	-24.5	0.4	7	6.5	5	8.5	11.5	9	7.42384	6.52114	4.79406	8.40827	11.062	8.94342	middle
62	48	aof-MIR166b-p3_2ss6GC17TG	AAGAACGAAAGTTGGGGG	18	NW_015842764.1	+	44133	44150	AAGAACGAAAGTTGGGGG	1	aof-MIR166b,	aof-MIR166b	tgaagaaggaaagttgggtgtttggaatgaagtttgatccaagatcttttcgccattgatcttgttttcagtcccatatatattttaaaaaaaagataccggggtaagttttattccaatattttagggccagaTCTCGGACCAGGCTTCATTCTtcacaccttactttttattgcaaat	aof-MIR166b-p3	aagaaggaaagttgggtg	3'	New	gp2b	...(((....))).....	10	50	-3.4	0.4	25	17	14.5	6.5	7.5	7	26.5137	17.0553	13.9028	6.42985	7.21436	6.956	middle
63	49	gma-miR166h-3p_L-2R+2	TCGGACCAGGCTTCATTCCCG	21	NW_015867726.1	-	156120	156212	gtcgTCGGACCAGGCTTCATTCCCCccaaaatttttgcttccttcatacgaacatgaaggtttaatcctttcttcctaacctcgttcgataca	18	gma-MIR166j,gma-MIR166h,ath-MIR166a,ath-MIR165a,ath-MIR165b,gra-MIR166c,aly-MIR165a,aly-MIR165b,mes-MIR166h,csi-MIR166b,lus-MIR166b,cme-MIR166g,aof-MIR166c,bna-MIR166f,cas-MIR165a,cpa-MIR166d,crt-MIR166a,tcc-MIR166b,	gma-MIR166h	tggggatgatgGGAATGTTGTTTGGCTCGAGGtaactgcatggtcttaattttgttcatcttttgaagctttaatttatttatgggtttcaatcttttttgatcccttgaaacagaaaaagctttaaaggttggattttgaggctatccctttatgtgaTCTCGGACCAGGCTTCATTCCcgtcaacctt	gma-miR166h-3p	TCTCGGACCAGGCTTCATTCC	5'	Diff	gp2b	((.(((((((.(((............((((...))))...(((((((......)))))))...................))).))))))))).	92	44.1	-19	0.5	24	13	13.5	15.5	21.5	17.5	25.4532	13.0423	12.944	15.3327	20.6812	17.39	middle
64	50	gra-MIR166d-p3	CGGACCAGGCTTCATTCCCA	20	NW_015888977.1	-	14751	14782	catgagtgatttCGGACCAGGCTTCATTCCCC	1	gra-MIR166d,	gra-MIR166d	gcgaaagggtTGATGGGAATGTTGTTTGGCTcgaggtcatttagggttcgtctaatatctacatgtgcatacatacatagccctatatgatgtcggaccaggcttcattcccatcaaccaaacact	gra-MIR166d-p3	cggaccaggcttcattccca	3'	New	gp2b	...((((((..((......))..))))))...	26	53.1	-6.6	0.4	3.5	3	2.5	3	4	0	3.71192	3.00975	2.39703	2.96762	3.84766	0	low
65	51	ptc-miR166a_L+3_1ss23CT	CTCTCGGACCAGGCTTCATTCCTC	24	NW_015903896.1	+	15130	15244	aagaaaagaaacaagatttgttaaggagaatgttgtctggttcgtgaccaatctgtaaacagtaattagCTCTCGGACCAGGCTTCATTCCCCtcaactcaatgtttcttttagc	14	ptc-MIR166m,mtr-MIR166c,mtr-MIR166f,gma-MIR166k,osa-MIR166g,bdi-MIR166f,sbi-MIR166k,zma-MIR166l,lus-MIR166e,cme-MIR166e,fve-MIR166f,aof-MIR166a,ssl-MIR166a,tcc-MIR166c,	ptc-MIR166m	tgaggatgtgggggaatgtcgtctgactcgagacaacaggtaaactgaaggaatggccggagtttaagagttctcTCGGACCAGGCTTCATTCCCCtcatccaca	ptc-miR166a	TCGGACCAGGCTTCATTCCCC	3'	Diff	gp2b	...((((((((((......(((.(((.(((((..((((((((((.((.....(((....)))........)).))))))))))..))))).))).)))....))))))))))...	109	39.1	-40.6	0.9	0	4	0	0	3.5	4.5	0	4.01301	0	0	3.3667	4.47171	low
66	52	stu-miR166b_R-2_1ss19CT	TCGGACCAGGCTTCATTCT	19	NW_015904204.1	-	54538	54682	tatggagtgattTCGGACCAGGCTTCATTCTttacacccatttcttatagctcctgaagctcaatttgcctccgatccttgaagaaaatagtgaagtggtgtgtagttccagtgatcaagtaagtatcagttcttttacttctac	11	stu-MIR166b,ptc-MIR166q,ptc-MIR166n,ptc-MIR166o,bdi-MIR166a,bdi-MIR166j,lus-MIR166f,cme-MIR166i,aof-MIR166b,ata-MIR166c,aqc-MIR166c,	stu-MIR166b	ggaatgttgtttggttcgaaatcattcaacaaattaaagtccatctcgatgatcaatgaattgaatgattTCGGACCAGGCTTCATTCCTC	stu-miR166b	TCGGACCAGGCTTCATTCCTC	5'	Diff	gp2b	...(((((((....((((...((((((((..(((((((((((((....((((.....))))..((((..((.(((...))).)).))))...))))))).))))))....))))).......)))....))))..)))))))...	139	40	-29	0.5	290.5	231.5	284.5	270	307	232.5	308.09	232.253	272.782	267.086	295.308	231.038	middle
67	53	mes-miR166i_L-1	TGGACCAGGCTTCATTCCCC	20	NW_015906725.1	+	33821	33917	ggcgatccacagaatctattggacagaTGGACCAGGCTTCATCCCCCtatctttgggagtgagcggcatgatgacccccaggattttattgatcggt	1	mes-MIR166i,	mes-MIR166i	atggttgtttttgaagggaatgttggctggctctaggcattcacaagtgtgggagaagaaatcgatcagaagcagtggaagctTTGGACCAGGCTTCATTCCCCtcaatataattaccat	mes-miR166i	TTGGACCAGGCTTCATTCCCC	5'	Diff	gp2b	..(((((...(((((((...((.((.(((..((..(((.((..(((........)))..))))))))))..)).))....)))))))...)))))..	93	51.5	-23.8	0.5	3.5	7	0	3.5	0	0	3.71192	7.02276	0	3.46223	0	0	low
68	53	mes-miR166i_L-1	TGGACCAGGCTTCATTCCCC	20	NW_015944113.1	-	86364	86404	TGGACCAGGCTTCATTCTCCtgctttcgagggtaagccaca	1	mes-MIR166i,	mes-MIR166i	atggttgtttttgaagggaatgttggctggctctaggcattcacaagtgtgggagaagaaatcgatcagaagcagtggaagctTTGGACCAGGCTTCATTCCCCtcaatataattaccat	mes-miR166i	TTGGACCAGGCTTCATTCCCC	5'	Diff	gp2b	.......(((((.(..(((........)))..))))))...	31	53.7	-11.8	0.5	3.5	7	0	3.5	0	0	3.71192	7.02276	0	3.46223	0	0	low
69	54	stu-miR166b_R-1	TCGGACCAGGCTTCATTCCT	20	NW_015920153.1	+	130306	130340	tatggagtgactTCGGACCAGGCTTCATTCCTtac	53	stu-MIR166b,sly-MIR166c,ptc-MIR166d,ptc-MIR166f,ptc-MIR166q,ptc-MIR166n,ptc-MIR166o,mtr-MIR166e,mtr-MIR166b,mtr-MIR166c,mtr-MIR166f,gma-MIR166e,gma-MIR166k,gma-MIR166r,osa-MIR166j,osa-MIR166h,osa-MIR166g,osa-MIR166m,ath-MIR166a,bdi-MIR166j,bdi-MIR166f,sbi-MIR166b,sbi-MIR166k,sbi-MIR166f,mes-MIR166j,zma-MIR166h,zma-MIR166f,zma-MIR166m,zma-MIR166l,vvi-MIR166f,vvi-MIR166a,vvi-MIR166b,csi-MIR166j,csi…	stu-MIR166b	ggaatgttgtttggttcgaaatcattcaacaaattaaagtccatctcgatgatcaatgaattgaatgattTCGGACCAGGCTTCATTCCTC	stu-miR166b	TCGGACCAGGCTTCATTCCTC	3'	Diff	gp2b	...(((((((..((......))..)))))))....	28	48.6	-9.5	0.6	526	470	669	552	632.5	454	557.849	471.528	641.446	546.043	608.411	451.146	middle
70	55	aof-MIR166b-p3_1ss18CA	TCGGACCAGGCTTCATTATT	20	NW_015954110.1	-	102760	102794	ccgggtctaatgggTCGGACCAGGCTTAATTATTt	8	ptc-MIR166q,ptc-MIR166n,ptc-MIR166o,bdi-MIR166j,lus-MIR166f,aof-MIR166b,ata-MIR166c,aqc-MIR166c,	aof-MIR166b	tgaagaaggaaagttgggtgtttggaatgaagtttgatccaagatcttttcgccattgatcttgttttcagtcccatatatattttaaaaaaaagataccggggtaagttttattccaatattttagggccagaTCTCGGACCAGGCTTCATTCTtcacaccttactttttattgcaaat	aof-MIR166b-p3	TCGGACCAGGCTTCATTCTt	3'	New	gp2b	((.(((((........))))).))...........	24	48.6	-8	0.5	0	0	0	0	7	0	0	0	0	0	6.7334	0	low
71	56	ptc-miR167e_R+1	TGAAGCTGCCAGCATGATCTGC	22	NW_015889114.1	-	78892	78919	tTGAAGCTGCCAGCATGATCTGGtacga	48	ptc-MIR167e,mtr-MIR167b,gma-MIR167g,gma-MIR167j,osa-MIR167e,osa-MIR167h,osa-MIR167d,osa-MIR167g,osa-MIR167f,osa-MIR167j,bdi-MIR167g,bdi-MIR167d,bdi-MIR167e,bdi-MIR167c,lja-MIR167,sbi-MIR167e,sbi-MIR167f,sbi-MIR167g,sbi-MIR167h,sbi-MIR167d,ppe-MIR167c,mes-MIR167d,mes-MIR167f,mes-MIR167e,zma-MIR167e,zma-MIR167f,zma-MIR167j,csi-MIR167a,lus-MIR167i,tae-MIR167c,cme-MIR167f,cme-MIR167d,aof-MIR167b,ata-…	ptc-MIR167e	cactagtagtTGAAGCTGCCAGCATGATCTGaactttccttaattttcctatacgggaaagactagatcatgtggtagtttcatctattga	ptc-miR167e	TGAAGCTGCCAGCATGATCTG	5'	Diff	gp2b	.......((((((......))))))...	18	50	-6.3	0.5	47.5	55.5	42.5	54	45.5	34	50.3761	55.6805	40.7495	53.4172	43.7671	33.7863	middle
72	56	ptc-miR167e_R+1	TGAAGCTGCCAGCATGATCTGC	22	NW_015948250.1	-	18689	18716	tTGAAGCTGCCAGCATGATCTGGtacga	48	ptc-MIR167e,mtr-MIR167b,gma-MIR167g,gma-MIR167j,osa-MIR167e,osa-MIR167h,osa-MIR167d,osa-MIR167g,osa-MIR167f,osa-MIR167j,bdi-MIR167g,bdi-MIR167d,bdi-MIR167e,bdi-MIR167c,lja-MIR167,sbi-MIR167e,sbi-MIR167f,sbi-MIR167g,sbi-MIR167h,sbi-MIR167d,ppe-MIR167c,mes-MIR167d,mes-MIR167f,mes-MIR167e,zma-MIR167e,zma-MIR167f,zma-MIR167j,csi-MIR167a,lus-MIR167i,tae-MIR167c,cme-MIR167f,cme-MIR167d,aof-MIR167b,ata-…	ptc-MIR167e	cactagtagtTGAAGCTGCCAGCATGATCTGaactttccttaattttcctatacgggaaagactagatcatgtggtagtttcatctattga	ptc-miR167e	TGAAGCTGCCAGCATGATCTG	5'	Diff	gp2b	.......((((((......))))))...	18	50	-6.3	0.5	47.5	55.5	42.5	54	45.5	34	50.3761	55.6805	40.7495	53.4172	43.7671	33.7863	middle
73	57	ptc-miR167a_R+2_2	TGAAGCTGCCAGCATGATCTATC	23	NW_015916282.1	-	5226	5349	agcgggaacaagTGAAGCTGCCAGCATGATCTAACcttggccaaaataaaattggaaaggaataaagaaaaacaaattttgactatagttaggtcatgctccgacagcttcactcgttctcacc	10	ptc-MIR167b,ptc-MIR167d,ath-MIR167b,bdi-MIR167a,aly-MIR167b,csi-MIR167e,cas-MIR167b,ghr-MIR167a,dpr-MIR167b,tcc-MIR167b,	ptc-MIR167d	agggaaaaggTGAAGCTGCCAGCATGATCTAtctttggttagagaaggatagaagcgaaagaactaaccctagctaggtcatgctctgacagcctcactccttcc	ptc-miR167a	TGAAGCTGCCAGCATGATCTA	5'	Diff	gp2b	...((((((.((((((((((..(((((((((((((..(((.((((((....(((..................))))))))).)))..)))))))))))))....)))))))))).))))))...	118	41.1	-49.5	1	9	0	0	5	0	10	9.54494	0	0	4.94604	0	9.93714	low
74	58	bra-miR168a-5p_L+1	CTCGCTTGGTGCAGGTCGGGAA	22	NW_015837819.1	-	19368	19492	TTCGCTTGGTGCAGGTCGGGAActgactcaccggtgacgctgtccgcgccggaatcggtggcgttagtttcgttgatattttgtttgcatttatcgatatttagagagctctctttaggacttat	2	bra-MIR168a,bna-MIR168a,	bra-MIR168a	ttacggcggcctctgacTCGCTTGGTGCAGGTCGGGAActgattggctgacaccgccacgtggctttccatggttggcttgtgagcagggatcggatCCCGCCTTGTATCAAGTGAATccgagtccgacgtga	bra-miR168a-5p	TCGCTTGGTGCAGGTCGGGAA	5'	Diff	gp2b	...((.....)).((((.(((((((((((((((((..((..(....)..))..)))))))).))))))))).((((((...((....))..))))))....((((((....)))))).))))...	109	48	-37.9	0.6	4	3	0	8.5	9.5	10	4.2422	3.00975	0	8.40827	9.13819	9.93714	low
75	58	bra-miR168a-5p_L+1	CTCGCTTGGTGCAGGTCGGGAA	22	NW_015942083.1	-	11456	11513	aggagttcccattttttgcggcggtctctaaTTCGCTTGGTGCAGGTCGGGAActgac	2	bra-MIR168a,bna-MIR168a,	bra-MIR168a	ttacggcggcctctgacTCGCTTGGTGCAGGTCGGGAActgattggctgacaccgccacgtggctttccatggttggcttgtgagcagggatcggatCCCGCCTTGTATCAAGTGAATccgagtccgacgtga	bra-miR168a-5p	TCGCTTGGTGCAGGTCGGGAA	3'	Diff	gp2b	...(((((((.....(((((((((........)))))....))))...)))))))...	52	53.4	-17.8	0.6	4	3	0	8.5	9.5	10	4.2422	3.00975	0	8.40827	9.13819	9.93714	low
76	59	sly-miR168b-3p_R+1	CCCGCCTTGCATCAACTGAATA	22	NW_015942083.1	-	11163	11209	tttgttCCCGCCTTGCATCAACTGAATTggtgaccgcggtgaatttg	1	sly-MIR168b,	sly-MIR168b	ttgcggtggtttctcatTCGCTTGGTGCAGGTCGGGACctacctcgccggcaacaatggcggtagctgacggcgacggcagcgtaccggtaaaaaagaatcttatttttacatgttgttgcgtagtttgggtCCCGCCTTGCATCAACTGAATaggagactgcggtga	sly-miR168b-3p	CCCGCCTTGCATCAACTGAAT	5'	Diff	gp2b	...((((((((....((((((.....))))))...)))).))))...	41	48.9	-14.2	0.6	8	0	12	11	0	0	8.48439	0	11.5058	10.8813	0	0	middle
77	60	osa-MIR169e-p5_2ss15AG22GC	TGTAGCCAAGGATGGCTTGCCC	22	NW_015799297.1	-	25135	25314	agaaagagagatcttgtgtgaagataaagaatctgtgtTGTAGCCAAGGATGGCTTGCCCaaactcatattgtggatatattttaaaaagcgagctattagttctagagtatgtgctttgggcagttgtccgcggttaccaacacagcttctttttcttttcatgcaagtccttctctta	16	sly-MIR169f,osa-MIR169e,bdi-MIR169m,bdi-MIR169n,bdi-MIR169b,mdm-MIR169n,mdm-MIR169l,sbi-MIR169j,ppe-MIR169j,mes-MIR169f,vvi-MIR169x,csi-MIR169b,cme-MIR169e,cme-MIR169n,fve-MIR169d,ata-MIR169h,	osa-MIR169e	gctggttgtgTAGCCAAGGATGACTTGCCGGcctggtttgtgttcatcagcaatccagcatatgctgtattgccgtgtgtgatcgatcgatgcatggaccggcaagttattttctttggctacattacaacc	osa-MIR169e-p5	tgTAGCCAAGGATGACTTGCCG	5'	New	gp2b	...(((((((..((((..((((((.((((((.(((((((((((((..(((..(((.(((((((..((((((.((((..........................)))).))))))...))))))))))..)))..))))).)))))))).)))))).)))..)))..))))...))))))).	176	39.4	-75	1.1	5	7	21	18	13	13	5.30275	7.02276	20.1351	17.8057	12.5049	12.9183	middle
78	61	bdi-miR169b_R+1_1ss20GC	TAGCCAAGGATGACTTGCCCGG	22	NW_015852691.1	+	1	110	gTAGCCAAGGATGACTTGCCCGCtccattattttaaaaggtgttttgattacaccatttaatactggtagccttttttgcttggtttcatgcagtctccttggctatctt	10	bdi-MIR169b,mdm-MIR169c,mdm-MIR169d,mes-MIR169x,mes-MIR169z,mes-MIR169r,mes-MIR169t,mes-MIR169v,csi-MIR169b,ata-MIR169h,	bdi-MIR169b	gagatagagagtggaatgTAGCCAAGGATGACTTGCCGGgtatgtgcatgtacgcttcagggaattatatgcatccctggtctgaatccatgctgatatttcccgg	bdi-miR169b	TAGCCAAGGATGACTTGCCGG	5'	Diff	gp2b	(((((((((((.(((......((((((.(((..((((.(((((.......))))).))))))).))).)))......(((.((....)).)))))))))))))))))...	107	40	-37.4	0.8	11	4.5	42.5	32.5	8.5	14.5	11.666	4.51463	40.7495	32.1493	8.17627	14.4089	middle
79	61	bdi-miR169b_R+1_1ss20GC	TAGCCAAGGATGACTTGCCCGG	22	NW_015945260.1	-	32874	33054	aacgaggggttttaagatgaaaagaagagtcttatttgaTAGCCAAGGATGACTTGCCCGGaccattttcaagggcttatttaattagctagataaataataaaagcctttttgcatgagttgcaggcagtcaactttggctatgtgatatgctcttcactctcatcctagggcttctctt	10	bdi-MIR169b,mdm-MIR169c,mdm-MIR169d,mes-MIR169x,mes-MIR169z,mes-MIR169r,mes-MIR169t,mes-MIR169v,csi-MIR169b,ata-MIR169h,	bdi-MIR169b	gagatagagagtggaatgTAGCCAAGGATGACTTGCCGGgtatgtgcatgtacgcttcagggaattatatgcatccctggtctgaatccatgctgatatttcccgg	bdi-miR169b	TAGCCAAGGATGACTTGCCGG	5'	Diff	gp2b	...(((..((..((.(((((...(((((((..((((..((((((((((.(((((.(((..((((((....((((((((..(((.(((......))).)))...))))))))....))).)))...)))))))).))))))))))..)))).)))))))....))))).))..))..)))..	176	39.2	-67.6	1	11	4.5	42.5	32.5	8.5	14.5	11.666	4.51463	40.7495	32.1493	8.17627	14.4089	middle
80	62	ptc-miR169v_L+2R-1_1ss17TA	TGTAGCCAAGGATGACATGCCC	22	NW_015887674.1	+	54551	54730	ataaagagagatcttgtgtgaagatgaagaatctgcgtTGTAGCCAAGGATGACATGCCCaaactcatattatgtatatgttttaaaaggcgagctattagttctagattatgtgttttgggctgttgtccgcggttaccaccgaaggttctttttcttgtcatgcaagtccttctctta	24	sly-MIR169f,ptc-MIR169w,ptc-MIR169v,ptc-MIR169ac,osa-MIR169e,bdi-MIR169m,bdi-MIR169n,bdi-MIR169b,mdm-MIR169c,mdm-MIR169d,mdm-MIR169n,mdm-MIR169l,sbi-MIR169j,ppe-MIR169j,mes-MIR169v,mes-MIR169f,vvi-MIR169x,csi-MIR169b,lus-MIR169a,lus-MIR169d,cme-MIR169e,cme-MIR169n,fve-MIR169d,ata-MIR169h,	ptc-MIR169v	cgtgtttggTAGCCAAGGATGACTTGCCCActccattgaaagagtttttcaagcatatggtagtgtagaacttttctttggttctgggcagtcatcttggctatgctgac	ptc-miR169v	TAGCCAAGGATGACTTGCCCA	5'	Diff	gp2b	...(((((((..((((..((((((..((((((((..((.((((((..(((..(((.(((((((..(((((.((.((...............((((.....)))))).)).))))).))))))))))..)))..)))))).))...))))))))..)))..)))..))))...))))))).	176	39.4	-66.5	0.9	27	28	110	127	25	66	28.6348	28.091	105.469	125.629	24.0479	65.5851	middle
81	63	osa-miR171a	TGATTGAGCCGCGCCAATATC	21	NW_015880502.1	+	35988	36123	aaaagatgtggatgtacaaggcaaaaggaaaggcaatagcagagcctctttgaagtaaaaagcagacctcttgaagggtttgccaaggggagagagctgtTGATTGAGCCGCGCCAATATCatttgcgcgtttgag	22	sly-MIR171c,osa-MIR171a,ath-MIR171a,bdi-MIR171a,mdm-MIR171e,mdm-MIR171c,mdm-MIR171d,sbi-MIR171j,sbi-MIR171g,aly-MIR171a,zma-MIR171n,zma-MIR171a,vvi-MIR171e,cme-MIR171g,cme-MIR171a,cme-MIR171e,bra-MIR171e,bna-MIR171f,bna-MIR171g,cas-MIR171a,tcc-MIR171a,ccl-MIR171,	osa-MIR171a	ggaaagagcgatattggtgaggttcaatccgatgattggttttacagcagtggtaaaatcagtatcTGATTGAGCCGCGCCAATATCtcttcctct	osa-miR171a	TGATTGAGCCGCGCCAATATC	3'	Yes	gp2b	...(((((((((((.....(((....((.....(((((((.....(((((((.........((((((((......))))))))))))))).....)))))))......))..))).....))))..)))))))...	130	46.3	-38.5	0.6	5	7	6.5	7.5	6	9.5	5.30275	7.02276	6.23228	7.41906	5.77149	9.44028	low
82	63	osa-miR171a	TGATTGAGCCGCGCCAATATC	21	NW_015935486.1	+	77482	77517	TGATTGAGCCGCGCCAATATCccttgcgcgagtact	22	sly-MIR171c,osa-MIR171a,ath-MIR171a,bdi-MIR171a,mdm-MIR171e,mdm-MIR171c,mdm-MIR171d,sbi-MIR171j,sbi-MIR171g,aly-MIR171a,zma-MIR171n,zma-MIR171a,vvi-MIR171e,cme-MIR171g,cme-MIR171a,cme-MIR171e,bra-MIR171e,bna-MIR171f,bna-MIR171g,cas-MIR171a,tcc-MIR171a,ccl-MIR171,	osa-MIR171a	ggaaagagcgatattggtgaggttcaatccgatgattggttttacagcagtggtaaaatcagtatcTGATTGAGCCGCGCCAATATCtcttcctct	osa-miR171a	TGATTGAGCCGCGCCAATATC	5'	Yes	gp2b	.......(((((((...........))))).))...	26	55.6	-8.3	0.4	5	7	6.5	7.5	6	9.5	5.30275	7.02276	6.23228	7.41906	5.77149	9.44028	low
83	64	ptc-miR171e_R+2_1ss21CT	TGATTGAGCCGTGCCAATATTTT	23	NW_015935578.1	+	89055	89174	tctatgaaacagtaactttgatattggccaggttcactcagacagatacacaacattattttgaatgttgttgttttgcttTGATTGAGCCGTGCCAATATCTTagttctctttcattac	15	ptc-MIR171f,mtr-MIR171c,osa-MIR171e,bdi-MIR171d,sbi-MIR171i,mes-MIR171h,zma-MIR171e,csi-MIR171d,aof-MIR171a,ata-MIR171d,hvu-MIR171,rco-MIR171d,aqc-MIR171a,aqc-MIR171d,tcc-MIR171h,	ptc-MIR171f	gtgtcattgcgatgttggcccggttcactcagagaaaagacaccattttttttcaagaagatcatcaaagcttgaaagaataatggtggtcggtcgtctcTGATTGAGCCGTGCCAATATCttagtgctc	ptc-miR171e	TGATTGAGCCGTGCCAATATC	3'	Diff	gp2b	...((((((.((.((((..(((((((((..((((((.(((((((((.((((((((((......))))))).))))))).))))).))))))..)))))))))..)))))).))))))...	114	35	-47.9	1.1	5	0	5	0	0	0	5.30275	0	4.79406	0	0	0	low
84	65	gma-miR172k	TGAATCTTGATGATGCTGCAT	21	NW_015865362.1	+	20630	20733	cacagtcgtcgtttgcaaatgcaacaccttcaagatttacatatatttgtcattaaaatcatatgTGAATCTTGATGATGCTGCATtagcaataaacgactaag	1	gma-MIR172k,	gma-MIR172k	ttgtttgcggatgtagcaccatcaagattcacatgcaaatgaaggtgggtgggactatgatgcaatctaagtgctctgccaatccattggtattttttggtggTGAATCTTGATGATGCTGCATcagccataaa	gma-miR172k	TGAATCTTGATGATGCTGCAT	3'	Yes	gp2b	...((((((...((((.((((((.((...(((((((((((((((((((.......)))).)))))))))))))))...)).)))))).))))...))))))...	98	33.7	-40	1.1	231.5	212.5	272.5	129	215	240.5	245.517	213.191	261.276	127.608	206.812	238.988	middle
85	65	gma-miR172k	TGAATCTTGATGATGCTGCAT	21	NW_015917076.1	-	74680	74727	tcaagtttgTGAATCTTGATGATGCTGCATcctcaaacactgactggg	1	gma-MIR172k,	gma-MIR172k	ttgtttgcggatgtagcaccatcaagattcacatgcaaatgaaggtgggtgggactatgatgcaatctaagtgctctgccaatccattggtattttttggtggTGAATCTTGATGATGCTGCATcagccataaa	gma-miR172k	TGAATCTTGATGATGCTGCAT	5'	Yes	gp2b	...(((..(((....((((.((((...)))).)))).)))..)))...	42	43.8	-9.2	0.4	231.5	212.5	272.5	129	215	240.5	245.517	213.191	261.276	127.608	206.812	238.988	middle
86	66	mtr-miR319a-3p_R+1	TTGGACTGAAGGGAGCTCCCA	21	NW_015880929.1	-	42457	42663	tagggcagtggagaaattaaggagctctctccagtccagtccgaggcagatcgaaggctataaacacagctgatgactcgttgattcttaagcacgtcaactagggttgagaaattgacgtattttgggattcaacgatgcatgagctatgtttagctatcgctgtcacgtcTTGGACTGAAGGGAGCTCCCTattatgccactgct	5	mtr-MIR319c,vvi-MIR319g,csi-MIR159c,lus-MIR319b,ctr-MIR319,	mtr-MIR319c	cagaaatgGGAGTTCCTTGCAGCCCAAAGcgccaagtgagaattctactggcaaattatgttTTGGACTGAAGGGAGCTCCCagttctt	mtr-miR319a-3p	TTGGACTGAAGGGAGCTCCC	3'	Diff	gp2b	...((((((((......((.((((((((((.((((((((..((.(((((..(((..((((..((((.((((.(((..(((((((.((..(((.(((((((..............)))))))..)))..)).)))))))..))).)))).))))))))..)))))))).))..)))))))).)))))))))).)).....))))))))	204	46.9	-97.1	1	0	3.5	5	4	8.5	0	0	3.51138	4.79406	3.95683	8.17627	0	low
87	67	mes-MIR319g-p5	ATCTGCCGACTCATTCATTCA	21	NW_015903838.1	+	89175	89379	tgtggaagatggtacaagagagcttcctttagtccactcataggttgacgaagggttttgaattATCTGCCGACTCATTCATTCAaacacagtaggaaatctttgtgttaatactactgtgaatgtgtgaatgatgcgggagataaattcatccttctttatctttgcttggactgaagggagctcccttttacctttgtttctt	3	mes-MIR319g,rco-MIR319c,seu-MIR319,	mes-MIR319g	gaatgtggaaatggtgtgagagagcttccttcagcccactcatggatggggtaaaaggggcggaaatatctgccgactcattcattcaagcactagtagacagagatactggtaatactgtgtttagctactgtgattgcgtgaatgatgcgggagataattttgcatccctcttttctgtgcTTGGACTGAAGGGAGCTCCTTccttctctattacctacattt	mes-MIR319g-p5	atctgccgactcattcattca	5'	New	gp2b	...(((((..((((.(((.(((((((((((((((((..((.((((.((.((((((...((((((((((.(((..(((((((..((..((((((((..................))))))))..))..)))))))..))).)))).)))))))))))).)))))).))..))))))))))))))))).))).))))....))))).	201	39.5	-88.5	1.1	0	0	4	16.5	0	0	0	0	3.83525	16.3219	0	0	middle
88	67	mes-MIR319g-p5	ATCTGCCGACTCATTCATTCA	21	NW_015920968.1	+	50878	51075	ggaaggtggtataagagagcttcctttagtccactcataggtagactaaggattttgaattATCTGCCGACTCATTCATTCAaatgcagtaggaaatctttgtgttactactactgtgaatgtgtgaatgatgcgggagataaattcatccttctttatctttgcttggactgaagggagctcccttttacccttatg	3	mes-MIR319g,rco-MIR319c,seu-MIR319,	mes-MIR319g	gaatgtggaaatggtgtgagagagcttccttcagcccactcatggatggggtaaaaggggcggaaatatctgccgactcattcattcaagcactagtagacagagatactggtaatactgtgtttagctactgtgattgcgtgaatgatgcgggagataattttgcatccctcttttctgtgcTTGGACTGAAGGGAGCTCCTTccttctctattacctacattt	mes-MIR319g-p5	atctgccgactcattcattca	5'	New	gp2b	...(((.((((.(((.(((((((((((((((((..((.(((((((..(((((...((((((((((.(((..(((((((..((...(((((((..................)))))))...))..)))))))..))).)))).))))))))))).))))))).))..))))))))))))))))).))).)))))))...	192	39.9	-84.8	1.1	0	0	4	16.5	0	0	0	0	3.83525	16.3219	0	0	middle
89	68	ptc-miR319e_R+1	TTGGACTGAAGGGAGCTCCTC	21	NW_015912893.1	-	50702	50805	ccccacttaTTGGACTGAAGGGAGCTCCTCcttatatattcatacttaatatattaggtaaaactaatgtaagtaagttccttttgtagctttcaaaggtgtag	24	ptc-MIR319e,ptc-MIR319h,ptc-MIR319b,ptc-MIR319f,ptc-MIR319g,gma-MIR319q,gma-MIR319l,gma-MIR319g,gma-MIR319c,ath-MIR319c,aly-MIR319c,aly-MIR319d,ppe-MIR319a,mes-MIR319h,mes-MIR319g,mes-MIR319f,vvi-MIR319g,cme-MIR319c,cme-MIR319d,cas-MIR319c,cpa-MIR319,rco-MIR319d,vun-MIR319b,pvu-MIR319c,	ptc-MIR319g	taatcgtgggagagagcttctttcagcccactcgtggataggacaaaggggttgaactagctgccgactcattcattcaagcactagtagaaaaaaaggcgaacggtgtttcttttgctactgtgattgtgtgaatgatgcgggagataattttccatcctctccttttctgtgcTTGGACTGAAGGGAGCTCCTtccttctct	ptc-miR319e	TTGGACTGAAGGGAGCTCCT	5'	Diff	gp2b	...(((((.(((((((((((((((((....(((((((.....(((((((....)))))))......)))))))..))))))))))..))..))))))))))...	98	34.6	-24.4	0.7	2.5	4.5	5	2.5	0	2.5	2.65137	4.51463	4.79406	2.47302	0	2.48428	low
90	68	ptc-miR319e_R+1	TTGGACTGAAGGGAGCTCCTC	21	NW_015949529.1	-	7264	7325	acgggggagcaactactttcgctaatttgacccactcaTTGGACTGAAGGGAGCTCCTCttt	10	ptc-MIR319e,ptc-MIR319h,ptc-MIR319b,ppe-MIR319a,mes-MIR319f,mes-MIR319h,vvi-MIR319g,cme-MIR319c,cpa-MIR319,rco-MIR319d,	ptc-MIR319h	ttgtaggggctaaagtgctccttttagtccaataaggagggctgagaagcggctagagctgccatctcatgcatttaggcaatgcttaacatttggcaaagaggtttaagcttggccaggtgcatggtgtgggagcaactccttccgcatgctttgttcgcccaTTGGACTGAAGGGAGCTCCTggttttaccac	ptc-miR319e	TTGGACTGAAGGGAGCTCCT	3'	Diff	gp2b	..((((((((.....((((((((((..(((.....)))))))..))))))..))))))))..	58	50	-17.8	0.6	2.5	4.5	5	2.5	0	2.5	2.65137	4.51463	4.79406	2.47302	0	2.48428	low
91	69	stu-miR384-5p_L+1	ATTGGCATTCTGTCCACCTCC	21	NW_015897189.1	-	58558	58730	ggaagtttggcaaagggtttcttacagagttcTTTGGCATTCTGTCCACCTCCctcttctttagaaatgaagatgaccaagaaaatgaaaaggacaaaaaaaaaggaggtttaattaacgtggaggtgggcatactgccaatagagctgtgttgatttctctttgtaaaactc	31	stu-MIR384,sly-MIR394,ptc-MIR394b,gma-MIR394b,gma-MIR394a,osa-MIR394,ath-MIR394b,ath-MIR394a,bdi-MIR394,mdm-MIR394b,mdm-MIR394a,aly-MIR394b,aly-MIR394a,ppe-MIR394a,mes-MIR394a,mes-MIR394b,zma-MIR394b,vvi-MIR394b,csi-MIR394a,lus-MIR394a,lus-MIR394b,cme-MIR394a,cme-MIR394b,fve-MIR394,bna-MIR394b,bna-MIR394a,cas-MIR394,ata-MIR394,ghr-MIR394a,cca-MIR394,tcc-MIR394a,	stu-MIR384	TTGGCATTCTGTCCACCTCCcagcttactgaggactgaggAGGGGGCCAAAGTGCCAAAC	stu-miR384-5p	TTGGCATTCTGTCCACCTCC	5'	Diff	gp2b	...(((((..(((((((..((..(((.((((((((((((...(((((((((((.((.((((((....)))))).))................................(((.....)))..)))))))))))...)))))).)))))).))).))...)))))))..))))).	169	39.3	-62.4	0.9	77.5	86.5	87	79.5	138	96.5	82.1926	86.7813	83.4167	78.6421	132.744	95.8934	middle
92	69	stu-miR384-5p_L+1	ATTGGCATTCTGTCCACCTCC	21	NW_015905470.1	+	164970	165106	tcttacaaagttcATTGGCATTCTGTCCACCTCCctcttccttagaaaagaaggtgaccaagaaaaagaaaaaggacaaaaaaaaaagaagggttaattaacgtggaggtgggcatactgccaacagagttgtgttg	23	stu-MIR384,ptc-MIR394b,gma-MIR394b,gma-MIR394a,mdm-MIR394a,ppe-MIR394a,ppe-MIR394b,mes-MIR394a,mes-MIR394b,zma-MIR394b,vvi-MIR394b,csi-MIR394a,lus-MIR394a,lus-MIR394b,cme-MIR394a,cme-MIR394b,fve-MIR394,bna-MIR394b,ghr-MIR394a,ghr-MIR394b,cca-MIR394,tcc-MIR394a,tcc-MIR394b,	stu-MIR384	TTGGCATTCTGTCCACCTCCcagcttactgaggactgaggAGGGGGCCAAAGTGCCAAAC	stu-miR384-5p	TTGGCATTCTGTCCACCTCC	5'	Diff	gp2b	...(((((..((..((((((...(((((((((((..((((.........)))).(((((................................)))))........)))))))))))...))))))..)).)))))...	131	40.1	-35.831	0.7	77.5	86.5	87	79.5	138	96.5	82.1926	86.7813	83.4167	78.6421	132.744	95.8934	middle
93	70	hex-MIR390a-p5_1ss21GT	TAAGAAGAATAAGCTCAGGAT	21	NW_015787369.1	-	641	691	agaacatgTAAGAAGAATAAGCTCAGGAGggataccaccacttcatgtatc	2	hex-MIR390a,hex-MIR390b,	hex-MIR390a	aaacaacataagaagaatAAGCTCAGGAGGGATAGCGCCatgattgttatcgaaaggttgacaagtgttgcttcattcggccatcatattgaaccagattgtataggagtatcaa	hex-MIR390a-p5	taagaagaatAAGCTCAGGAG	5'	New	gp2b	...(((((.(((..((......)).((.((....)).)).))))))))...	45	41.2	-10	0.5	70	140.5	108	53.5	249.5	41.5	74.2384	140.957	103.552	52.9226	239.998	41.2391	middle
94	71	hex-MIR390b-p3_1ss21GT	TAAGAAGAATAAGCTCAGGAT	21	NW_015806437.1	-	12698	12827	taaccttccttgcaagctttaggggtatatgacaggtttcggacttgcaaggtcaagaaaactcgagccatttctccagttttctaagagatgagaaacaaatgTAAGAAGAATAAGCTCAGGAAggata	2	hex-MIR390b,hex-MIR390a,	hex-MIR390b	taaacagcataagaagaatAAGCTCAGGAGGGATAGCGCCatgattgttatcgaaaggttggcaagtgttgcttcattcggccatcatattgaaccagattgtataggagtatcaa	hex-MIR390b-p3	taagaagaatAAGCTCAGGAG	3'	New	gp2b	...(((((((....(((((......(((((.....(((((.((((.....)))).((((((((.(((......))).)))))))).........)))))..)))))........))))).)))))))...	124	40	-35.2	0.7	70	140.5	108	53.5	249.5	41.5	74.2384	140.957	103.552	52.9226	239.998	41.2391	middle
95	72	sly-miR390a-3p_1ss21AT	CGCTATCCATCCTGAGTTTTT	21	NW_015820727.1	+	2222	2282	ttctgttttggctatcggtctgttgCGCTATCCATCCTGAGTTTTAtggcttttttcatgc	2	sly-MIR390a,ptc-MIR390d,	sly-MIR390a	agagatcaactatgaatgttgttcttgtggaaatggcatggggaatctataAAGCTCAGGAGGGATAGCACCatgaatacatcttaatggctatctatagCGCTATCCATCCTGAGTTTTAtggcttcttcatgctcgcttttggtgcttcatgttgatcttt	sly-miR390a-3p	CGCTATCCATCCTGAGTTTTA	3'	Diff	gp2b	...((....(((((((((..((..........))..))))......))))).....))...	55	42.6	-5.3	0.2	9	14	13.5	17.5	9.5	13	9.54494	14.0455	12.944	17.3111	9.13819	12.9183	middle
96	73	hex-MIR390b-p5_1ss21GA	TAAGAAGAATAAGCTCAGGAA	21	NW_015827951.1	+	113003	113124	atgTAAGAAGAATAAGCTCAGGAAggataacaccgctgcatggattaagatgataattgatgcatcgtttcatcgctttcacatggttgaaccatgactccgagcaccatttcttcttggtc	2	hex-MIR390b,hex-MIR390a,	hex-MIR390b	taaacagcataagaagaatAAGCTCAGGAGGGATAGCGCCatgattgttatcgaaaggttggcaagtgttgcttcattcggccatcatattgaaccagattgtataggagtatcaa	hex-MIR390b-p5	taagaagaatAAGCTCAGGAG	5'	New	gp2b	...(((((((((...((((.((((((((.....((.(((((..((((......))))..))))).))....))).))))).(((((.....))))).....)))).....)))))))))...	116	41.8	-35.5	0.7	5.5	11	13.5	4.5	18	2.5	5.83302	11.0358	12.944	4.45144	17.3145	2.48428	middle
97	74	stu-miR390-3p_2ss12TC21AT	CGCTATCCATCCTGAGTTTTT	21	NW_015916088.1	-	7453	7609	gtggaaattgcttggaaaatctgtaAAGCTCAGGAGGGATAGCACCAgagagagattatcttaatgagcttaattaacactatttaggctttcttttttgactatcgatctgtagCGCTATCCATCCTGAGTTTTAtggcttcttcatgctgtcttt	12	nta-MIR390a,stu-MIR390,sly-MIR390a,ptc-MIR390d,gma-MIR390d,gma-MIR390b,osa-MIR390,bdi-MIR390a,sbi-MIR390,zma-MIR390b,zma-MIR390a,ata-MIR390,	stu-MIR390	AAGCTCAGGAGGGATAGCACCatgaatacatcttaataactatctatagCGCTATCCATCTTGAGTTTTA	stu-miR390-3p	CGCTATCCATCTTGAGTTTTA	3'	Diff	gp2b	..(((....((.((((.((.(..((((((((((((.(((((((..((((..((..(((.......((((((((.((....)).)))))))).......)))...))..))))....))))))).))))))))))))..).)).)))).))..)))..	153	38.2	-53.8	0.9	9	14	13.5	17.5	9.5	13	9.54494	14.0455	12.944	17.3111	9.13819	12.9183	middle
98	76	sly-miR394-5p_L+1	CTTGGCATTCTGTCCACCTCC	21	NW_015798084.1	-	4174	4232	catggaggtttttcaAAGGGTTCCTTACAGAGTTCTTTGGCATTCTGTCCACCTCCccg	25	sly-MIR394,ptc-MIR394b,gma-MIR394g,gma-MIR394c,osa-MIR394,ath-MIR394b,ath-MIR394a,bdi-MIR394,mdm-MIR394b,mdm-MIR394a,sbi-MIR394a,sbi-MIR394b,aly-MIR394b,aly-MIR394a,ppe-MIR394a,zma-MIR394b,zma-MIR394a,cme-MIR394a,fve-MIR394,bna-MIR394b,bna-MIR394a,cas-MIR394,ata-MIR394,cca-MIR394,ssl-MIR394,	sly-MIR394	caatcttgattttcatgaagatttctcaaagggttccttacatagttctTTGGCATTCTGTCCACCTCCtttaccttcataatcttctatttttttagaaaaataatttttgttattattttttttaaaaaatggAGGTGGGCATACTGTCAACAgatttgtgttagtttctctttgtgaaatcttcttgatgttaattg	sly-miR394-5p	TTGGCATTCTGTCCACCTCC	3'	Diff	gp2b	...((((((...((((((..(((......)))..))))))..........))))))...	28	49.2	-16.1	0.6	68	97.5	86	75.5	126	95	72.1173	97.817	82.4579	74.6852	121.201	94.4028	middle
99	77	sly-miR394-5p_R+1	TTGGCATTCTGTCCACCTCCT	21	NW_015832017.1	-	58504	58597	tcagtagagccattTTGGCATTCTGTCCACCTCCAttgctagctccatatctttcaatgaggagggggccagagtgccaaactagctctgcaaa	19	sly-MIR394,ptc-MIR394b,osa-MIR394,ath-MIR394b,ath-MIR394a,bdi-MIR394,mdm-MIR394b,sbi-MIR394b,sbi-MIR394a,aly-MIR394b,aly-MIR394a,ppe-MIR394a,zma-MIR394a,cme-MIR394a,fve-MIR394,bna-MIR394a,cas-MIR394,ata-MIR394,ssl-MIR394,	sly-MIR394	caatcttgattttcatgaagatttctcaaagggttccttacatagttctTTGGCATTCTGTCCACCTCCtttaccttcataatcttctatttttttagaaaaataatttttgttattattttttttaaaaaatggAGGTGGGCATACTGTCAACAgatttgtgttagtttctctttgtgaaatcttcttgatgttaattg	sly-miR394-5p	TTGGCATTCTGTCCACCTCC	5'	Diff	gp2b	...(((((((...(((((((((((((((.(((((((((..((........))..))))..)))))))).))))))))))))...)))))))...	88	48.9	-44.6	1	89.5	89.5	86	78	108	75	94.9191	89.791	82.4579	77.1582	103.887	74.5285	middle
100	77	sly-miR394-5p_R+1	TTGGCATTCTGTCCACCTCCT	21	NW_015905941.1	-	30725	30886	aagggttccttacagagttctTTGGCATTCTGTCCACCTCCTcgatctccttttagaatggaaaaaaaataatattttcttcgttttaatttatgtgacgtagtttgaaacgatgagagtaaagtgtaaaattatggaggtgggcatactgccaacagattt	26	sly-MIR394,ptc-MIR394b,gma-MIR394g,gma-MIR394c,osa-MIR394,ath-MIR394b,ath-MIR394a,bdi-MIR394,mdm-MIR394b,mdm-MIR394a,sbi-MIR394a,sbi-MIR394b,aly-MIR394b,aly-MIR394a,ppe-MIR394a,zma-MIR394a,zma-MIR394b,cme-MIR394a,fve-MIR394,bna-MIR394a,bna-MIR394b,cas-MIR394,ata-MIR394,cca-MIR394,ssl-MIR394,tcc-MIR394b,	sly-MIR394	caatcttgattttcatgaagatttctcaaagggttccttacatagttctTTGGCATTCTGTCCACCTCCtttaccttcataatcttctatttttttagaaaaataatttttgttattattttttttaaaaaatggAGGTGGGCATACTGTCAACAgatttgtgttagtttctctttgtgaaatcttcttgatgttaattg	sly-miR394-5p	TTGGCATTCTGTCCACCTCC	5'	Diff	gp2b	.((..(((......)))..))((((((...(((((((((((..(((.(((.........)))..........(((((((.(((((((((..((((...))))..))))))))).))))))).........)))..)))))))))))...)))))).......	134	35.8	-50.4	0.9	89.5	89.5	86	78	108	75	94.9191	89.791	82.4579	77.1582	103.887	74.5285	middle
101	78	ppe-miR394a_L+2	ATTTGGCATTCTGTCCACCTCC	22	NW_015832729.1	+	66681	66703	tATTTGGCATTCTGTCAACCTCC	3	ppe-MIR394b,ghr-MIR394b,tcc-MIR394b,	ppe-MIR394b	gggtttctcaggggccttgttgcagaggcaatTTGGCATTCTGTCCACCTCCatattcactagtacacatagaagaagtttctttcttttattttacaagctctggaggtggtcagcatgtcaaactggctctgtaaatttctctctgagaaactc	ppe-miR394a	TTGGCATTCTGTCCACCTCC	3'	Diff	gp2b	...(((((.....))))).....	15	43.5	-3.4	0.3	2.5	0	2.5	4	3.5	0	2.65137	0	2.39703	3.95683	3.3667	0	low
102	78	ppe-miR394a_L+2	ATTTGGCATTCTGTCCACCTCC	22	NW_015951544.1	-	33393	33415	tATTTGGCATTCTGTCAACCTCC	3	ppe-MIR394b,ghr-MIR394b,tcc-MIR394b,	ppe-MIR394b	gggtttctcaggggccttgttgcagaggcaatTTGGCATTCTGTCCACCTCCatattcactagtacacatagaagaagtttctttcttttattttacaagctctggaggtggtcagcatgtcaaactggctctgtaaatttctctctgagaaactc	ppe-miR394a	TTGGCATTCTGTCCACCTCC	3'	Diff	gp2b	...(((((.....))))).....	15	43.5	-3.4	0.3	2.5	0	2.5	4	3.5	0	2.65137	0	2.39703	3.95683	3.3667	0	low
103	79	stu-MIR395f-p5_1ss13AG	GTTCCCTTGACCGCTTCATGA	21	NW_015804397.1	+	13984	14100	ttatcaaggtgttccctagaGTTCCCTTGACCGCTTCATGAgggcttacttctccataaattgttgtttgaagctctgTTGAAGTGTTTGGGGGAACTCtcaggttcactttgaaag	11	stu-MIR395f,stu-MIR395c,stu-MIR395h,stu-MIR395i,stu-MIR395a,stu-MIR395b,sly-MIR395b,sly-MIR395a,mtr-MIR395g,cme-MIR395b,cme-MIR395c,	stu-MIR395f	gttcccttgaccacttcatgagggcttacttcgttgtttgaagccctaCTGAAGTGTTTGGGGGAACTC	stu-MIR395f-p5	gttcccttgaccacttcatga	5'	New	gp2b	...((((((((..((..((((((((((..(.(((((((..(((((((.......((.....)).......)))))))..))))))).)..))))))))))..))..))))))))...	111	43.6	-54.1	1.1	0	0	0	5	0	0	0	0	0	4.94604	0	0	low
104	81	mdm-MIR397a-p3_1ss15CG	TTAGGCATCGGAAAGTTTCGTC	22	NW_015895717.1	-	478	536	tgagatgattgactatcatctggccttgctaTTAGGCATCGGAAAGTTTCGTCatcaga	1	mdm-MIR397a,	mdm-MIR397a	agaaacatcaTTGAGTGCAGCGTTGATGAAAgtccgtattccttwcgaatcttcattaggcatcggaaactttcgtcagctgtgcacccaattatgtttct	mdm-MIR397a-p3	ttaggcatcggaaactttcgtc	3'	New	gp2b	...((((((.((((.((.....((((.......))))....)).))))..))))))...	53	42.4	-17.2	0.7	96	81	115	73	83	71	101.813	81.2634	110.263	72.2122	79.8389	70.5537	middle
105	82	sbi-MIR398-p3_2ss5GA18AG	GGGGACGGACTGGGAACG	18	NW_015819268.1	+	109525	109625	gggtcccagtcccgaacccgtcggctgtcggtggactgctcgagctgctcccgcggcgagagcgggtcgccgcgtgccggccgGGGGACGGACTGGGAACG	2	sbi-MIR398,zma-MIR398b,	sbi-MIR398	gggggcggactgggaacacatgggaatgagagatgagattgctcggtcgtgctggccctgggctcgtagttgatctgcttgtatgcaTGTGTTCTCAGGTCGCCCCCGc	sbi-MIR398-p3	gggggcggactgggaaca	3'	New	gp2b	...(((((((((....(((((((((((.(((((..((((((..(((((....)))))..))))))..))))))).))))).))))....)))))))))...	95	76.2	-67.1	0.9	35.5	25	14.5	10	13.5	9.5	37.6495	25.0813	13.9028	9.89208	12.9858	9.44028	middle
106	82	sbi-MIR398-p3_2ss5GA18AG	GGGGACGGACTGGGAACG	18	NW_015951999.1	+	3217	3317	gggtcccagtcccgaacccattggctgtcggtgtactgctcgagttgctcccgcggtgagagcgggtcaccgcttgccagccgGGGGACGGACTGGGAACG	2	sbi-MIR398,zma-MIR398b,	sbi-MIR398	gggggcggactgggaacacatgggaatgagagatgagattgctcggtcgtgctggccctgggctcgtagttgatctgcttgtatgcaTGTGTTCTCAGGTCGCCCCCGc	sbi-MIR398-p3	gggggcggactgggaaca	3'	New	gp2b	...(((((((((....(((.(((((...(((((..((((((..(..((....))..)..))))))..)))))...)))))..)))....)))))))))...	95	68.3	-54.3	0.8	35.5	25	14.5	10	13.5	9.5	37.6495	25.0813	13.9028	9.89208	12.9858	9.44028	middle
107	83	stu-miR398b-3p_L-1R+1	TGTGTTCTCAGGTCACCCCTT	21	NW_015868378.1	+	21352	21472	gaacaatggtgcaccctagaggagtgaacatgggaacacatgtgcattttggtatttttgttttggctaaaatcttaatgcactTGTGTTCTCAGGTCACCCCTTtggggtcaccttgcta	23	stu-MIR398b,ptc-MIR398a,mtr-MIR398a,gma-MIR398b,gma-MIR398a,osa-MIR398a,ath-MIR398a,bdi-MIR398b,mdm-MIR398a,lja-MIR398,gra-MIR398,aly-MIR398a,vvi-MIR398a,csi-MIR398a,cme-MIR398b,cas-MIR398b,ghr-MIR398,rco-MIR398a,aqc-MIR398a,ahy-MIR398,ssl-MIR398,bol-MIR398a,tcc-MIR398b,	stu-MIR398b	GAGTGTGCCTTAGAACACAGGTgtattttggtctactcctgttttggacccaaaatatgcTTGTGTTCTCAGGTCACCCCT	stu-miR398b-3p	TTGTGTTCTCAGGTCACCCCT	3'	Diff	gp2b	...(((.((((.((((((((((.((((...((((((((((.(((((((..((.(((((.((....)).))))))).))))))).))))))))))..)))).)))))))))))))))))...	115	43.8	-59.2	1.1	51	38.5	71	68	46	73.5	54.088	38.6252	68.0757	67.2662	44.2481	73.038	middle
108	83	stu-miR398b-3p_L-1R+1	TGTGTTCTCAGGTCACCCCTT	21	NW_015901537.1	-	5852	5979	aatgaacaatggtgcaccccaaaggagtgaacatgggaacacatgtgcattttggtatttttgttttggctaaaatctaaatgcactTGTGTTCTCAGGTCACCCCTTttgggtcaccttgcttcttc	23	stu-MIR398b,ptc-MIR398a,mtr-MIR398a,gma-MIR398b,gma-MIR398a,osa-MIR398a,ath-MIR398a,bdi-MIR398b,mdm-MIR398a,lja-MIR398,gra-MIR398,aly-MIR398a,vvi-MIR398a,csi-MIR398a,cme-MIR398b,cas-MIR398b,ghr-MIR398,rco-MIR398a,aqc-MIR398a,ahy-MIR398,ssl-MIR398,bol-MIR398a,tcc-MIR398b,	stu-MIR398b	GAGTGTGCCTTAGAACACAGGTgtattttggtctactcctgttttggacccaaaatatgcTTGTGTTCTCAGGTCACCCCT	stu-miR398b-3p	TTGTGTTCTCAGGTCACCCCT	3'	Diff	gp2b	...((((((.((((.((((.(((((.((((...((((((((((.((((((((.((.(((((.((....)).))))))))))))))).))))))))))..)))).))))).))))))))))).)))...	122	42.2	-57.5	1.1	51	38.5	71	68	46	73.5	54.088	38.6252	68.0757	67.2662	44.2481	73.038	middle
109	84	fve-miR408_R+1_2ss19GT20CT	TGCACTGCCTCTTCCCTGTTTT	22	NW_015948361.1	-	19596	19642	TGCACTGCCACTTCCCTGTTTTgtaaataagtgattcagtggaaaat	10	ptc-MIR408,mtr-MIR408,gma-MIR408c,mdm-MIR408a,mes-MIR408,fve-MIR408,aof-MIR408,rco-MIR408,hbr-MIR408b,hbr-MIR408a,	fve-MIR408	aagacagggacgaggtagagcatggatggagttcccaacagaacagtcaagctgttgtggctccactcaTGCACTGCCTCTTCCCTGGCTt	fve-miR408	TGCACTGCCTCTTCCCTGGCT	5'	Diff	gp2b	...........(((((((..(..(......)..)..))).))))...	33	38.3	-8.4	0.5	5	0	0	7	0	7	5.30275	0	0	6.92446	0	6.956	low
110	85	stu-miR477a-5p_1ss12AT	CCTCTCCCTCATGGGCTTCTC	21	NW_015869744.1	+	22576	22704	cttcagggcacttattgttgCCTCTCCCTCAAGGGCTTCTCtcctgtaatgtttatactatgatttaaagtagaaagcatgcatggaaagaagctcggacggggagagccgacaagaggtgtcttgttt	1	stu-MIR477a,	stu-MIR477a	CCTCTCCCTCAAGGGCTTCTCtcctgcatgcttatatgttgggaaaGAAGCTCTAGCAGGGAGAGCCA	stu-miR477a-5p	CCTCTCCCTCAAGGGCTTCTC	5'	Diff	gp2b	...((((((((((.((((((.((((((((...((((((((.(((((((.(((((.((((.........))))..))))))))).))).))))))))....)))))))).)))))).))))))))))...	123	45.7	-60.7	1	0	0	2.5	12.5	0	2.5	0	0	2.39703	12.3651	0	2.48428	middle
111	85	stu-miR477a-5p_1ss12AT	CCTCTCCCTCATGGGCTTCTC	21	NW_015923011.1	-	22790	22938	ttaactcttcagggcagttattgttgCCTCTCCCTCATGGGCTTCTCtcctgcaatgtttagagagtatgatttaaggttaaagtagaaagcatgcagcgaaagaagctcgagcggggagagtcaataagaagtgtcttgttcagtgct	1	stu-MIR477a,	stu-MIR477a	CCTCTCCCTCAAGGGCTTCTCtcctgcatgcttatatgttgggaaaGAAGCTCTAGCAGGGAGAGCCA	stu-miR477a-5p	CCTCTCCCTCAAGGGCTTCTC	5'	Diff	gp2b	...(((...(((((((.((.((((((.((((((((..(((((((((.(((((((.(((((........((((.....)))).......)))))))))).)).)))))))))...)))))))).)))))).)).)))))))...)))...	143	44.3	-56.3	0.9	0	0	2.5	12.5	0	2.5	0	0	2.39703	12.3651	0	2.48428	middle
112	86	stu-miR477a-5p	CCTCTCCCTCAAGGGCTTCTC	21	NW_015922925.1	+	20417	20526	tcaagctaggcactgcttgttgCCTCTCCCTCAAGGGCTTCTCttctgcttgttcgtaatattaagatgctaaacttgcagggggagacaacgcgaaatgccttgctcac	1	stu-MIR477a,	stu-MIR477a	CCTCTCCCTCAAGGGCTTCTCtcctgcatgcttatatgttgggaaaGAAGCTCTAGCAGGGAGAGCCA	stu-miR477a-5p	CCTCTCCCTCAAGGGCTTCTC	5'	Yes	gp2b	...(((.(((((.(((..((((.(((((((((((((((.(((....(((......)))......))).)))...)))).)))))))).)))))))...))))).)))...	104	49.1	-38.5	0.7	0	0	0	6.5	0	0	0	0	0	6.42985	0	0	low
113	87	aqc-MIR482c-p3_2ss16GT20AC	GATGATGATGATGATTATGCTGAT	24	NW_015791228.1	-	64680	64736	acttctgttaattatattatatctcgacaatGATGATGATGATGATTATGCTGATaa	3	aqc-MIR482c,aqc-MIR482b,aqc-MIR482a,	aqc-MIR482c	ggggatggtggaaagggattgagttatgagaagccttgggtatgagagggtcggcatggtatgatgatgatgatgatgatgatgatgatgattcttctttcattttctctatttaaTCTTGCCGACTCCTCCCATACCaatggtttctcatttctctccccttccttttttccccct	aqc-MIR482c-p3	gatgatgatgatgatgatgatgat	3'	New	gp2b	...((.(((((((((((((((((........))).))))).))))))).)).))...	51	26.3	-7.7	0.5	7	5	6	7.5	13.5	4.5	7.42384	5.01626	5.75288	7.41906	12.9858	4.47171	middle
114	87	aqc-MIR482c-p3_2ss16GT20AC	GATGATGATGATGATTATGCTGAT	24	NW_015928417.1	-	6110	6157	aatgatgattcggctGATGATGATGATGATTATGCTGAGgtagttgag	3	aqc-MIR482c,aqc-MIR482b,aqc-MIR482a,	aqc-MIR482c	ggggatggtggaaagggattgagttatgagaagccttgggtatgagagggtcggcatggtatgatgatgatgatgatgatgatgatgatgattcttctttcattttctctatttaaTCTTGCCGACTCCTCCCATACCaatggtttctcatttctctccccttccttttttccccct	aqc-MIR482c-p3	gatgatgatgatgatgatgatgat	3'	New	gp2b	...(((..((((((((((.((....)).)))).))))))...)))...	42	39.6	-9.7	0.5	7	5	6	7.5	13.5	4.5	7.42384	5.01626	5.75288	7.41906	12.9858	4.47171	middle
115	88	ptc-miR482a.1_L+5R-1_1ss14TG	TCTTGCCTACTCCGCCCATTC	21	NW_015805309.1	-	191979	192106	ttgggaagcttttggtgtgagcggggtggcaagatgtcatatgtttatgtttggcaagatgtcatatgtttatgtttcataaaaattgagacaTCTTGCCTACTCCGCCCATTCacatggcttccaac	6	stu-MIR482d,sly-MIR482b,ptc-MIR482a,aof-MIR482c,cas-MIR472,hbr-MIR482a,	ptc-MIR482a	gagtcctagcaagtctttggagatgggagagtatgcaagaaggaaaaattcatgatttaatattccttcttgCCTACTCCTCCCATTCCatctgctttctgcgactc	ptc-miR482a.1	CCTACTCCTCCCATTCC	3'	Diff	gp2b	...(((((((....((((((((((((((((((((((((.((((..((((..((((.....))))))))..))))..(((.......)))))))))))))).)))))))....)))))))))))))...	122	42.2	-53.3	1	28.5	32	24	28.5	19	27.5	30.2256	32.104	23.0115	28.1924	18.2764	27.3271	middle
116	88	ptc-miR482a.1_L+5R-1_1ss14TG	TCTTGCCTACTCCGCCCATTC	21	NW_015826929.1	-	1854	1981	ttgggaagcttttggtgtgagcggggtggcaagatgtcatatgtttatgtttggcaagatgtcatatgtttatgtttcataaaaattgagacaTCTTGCCTACTCCGCCCATTCacatggcttccaac	6	stu-MIR482d,sly-MIR482b,ptc-MIR482a,aof-MIR482c,cas-MIR472,hbr-MIR482a,	ptc-MIR482a	gagtcctagcaagtctttggagatgggagagtatgcaagaaggaaaaattcatgatttaatattccttcttgCCTACTCCTCCCATTCCatctgctttctgcgactc	ptc-miR482a.1	CCTACTCCTCCCATTCC	3'	Diff	gp2b	...(((((((....((((((((((((((((((((((((.((((..((((..((((.....))))))))..))))..(((.......)))))))))))))).)))))))....)))))))))))))...	122	42.2	-53.3	1	28.5	32	24	28.5	19	27.5	30.2256	32.104	23.0115	28.1924	18.2764	27.3271	middle
117	89	stu-miR482c_2ss6TG22AG	TTTCCGATTCCACCCATGCCAG	22	NW_015826929.1	-	1322	1451	agtggaaagggaggagggatttggggagcttctggtgtcatatttatattttccgaaaggaaatataagagttgaaatcTTTCCGATTCCACCCATGCCAAtggcttccaatcactactccttttcctaa	3	stu-MIR482c,sly-MIR482d,pgi-MIR2118,	stu-MIR482c	gagagatttgggaagcttttggagtgggtgggatggaaaaatatcgtatttattttttttccttaaaaggcaaaaaagataagaaatgagattTTTCCTATTCCACCCATGCCAAtggcttccaatcatttactc	stu-miR482c	TTTCCTATTCCACCCATGCCAA	3'	Diff	gp2b	...((((((((((.((.((((..(((((((..(((..(.....((((((((.((....))))))))))((((((.........)))))).....)..)))..))))))))))).)).))))))))))...	124	41.5	-48.9	0.9	871.5	1112	1339	1383.5	972	1084.5	924.269	1115.62	1283.85	1368.57	934.981	1077.68	middle
118	89	stu-miR482c_2ss6TG22AG	TTTCCGATTCCACCCATGCCAG	22	NW_015917209.1	-	14821	14985	gtaggaagtggaaagggaggatgtatttgggaagcttctggtgtaggtgaggcggaaagatatcatatatatatttttccgaacggaattataggacttggtatcTTTCCGATTCCACCCATGCCAGtggcttccaatctgtgctccctttcctgataatcctcc	3	stu-MIR482c,sly-MIR482d,pgi-MIR2118,	stu-MIR482c	gagagatttgggaagcttttggagtgggtgggatggaaaaatatcgtatttattttttttccttaaaaggcaaaaaagataagaaatgagattTTTCCTATTCCACCCATGCCAAtggcttccaatcatttactc	stu-miR482c	TTTCCTATTCCACCCATGCCAA	3'	Diff	gp2b	..((((...((((((((((.((..(((..((((((..((((..(.((((..((((((((((((((......(((..((((....))))..))).....))))))))))))).)..)))).)..))))..)))))))))..)).))))))))))......))))..	161	44.8	-77.8	1.1	871.5	1112	1339	1383.5	972	1084.5	924.269	1115.62	1283.85	1368.57	934.981	1077.68	middle
119	90	aqc-miR482a_2ss5GA20AG	TCTTACCGACTCCTCCCATGCC	22	NW_015872823.1	-	9108	9249	TTTTACCGACTCCTCCCATGCCacaaatccccaggatacgaacatcattagtttctatctctagtagggattttactttctctaaatgagtatttattcccacaacatcttgcagggataaagctatcttgcataatttgga	3	aqc-MIR482a,aqc-MIR482c,aqc-MIR482b,	aqc-MIR482b	ggattgagttatgagaagccttgggtatgagagggtcggcatggtatgatgatgatgatgatgatgatgatgatgattcttctttcattttctctatttaaTCTTGCCGACTCCTCCCATACCaatggtttctcatttctcttccct	aqc-miR482a	TCTTGCCGACTCCTCCCATACC	5'	Diff	gp2b	.....((((....((((.(((............(((((..(((.......)))..)))))...((.((((...(((((.........))))).....))))))........)))))))....((......)).....)))).	105	38	-28	0.5	31.5	17	23.5	27	29.5	35.5	33.4073	17.0553	22.5321	26.7086	28.3765	35.2768	middle
120	90	aqc-miR482a_2ss5GA20AG	TCTTACCGACTCCTCCCATGCC	22	NW_015933252.1	+	21066	21094	attgtcgTCTTACCGACTCCTCCCATGCC	3	aqc-MIR482c,aqc-MIR482b,aqc-MIR482a,	aqc-MIR482a	ggggatggtggaaagtgattgagttatgagaagccttgggtatgagagggtcggcatggtatgatgatgatgatgatgatgatgatgatgattcttctttcattttctctatttaaTCTTGCCGACTCCTCCCATACCaatggtttctcatttctcttccctttcctttttatccccct	aqc-miR482a	TCTTGCCGACTCCTCCCATACC	3'	Diff	gp2b	...((((......))))............	14	55.2	-3.8	0.2	31.5	17	23.5	27	29.5	35.5	33.4073	17.0553	22.5321	26.7086	28.3765	35.2768	middle
121	91	eun-MIR530-p5_2ss3AT17CA	GATGAAGAACGTAGCGAA	18	NW_015797713.1	+	2029	2097	gcatcGATGAAGAACGTAGCGAAatgcgatacttggtgtgaattgcagaatcccgtgaaccatcgagtc	1	eun-MIR530,	eun-MIR530	aaggtgcagcctttaTCTGCATTTGCACCTGCACCTcaaattgctttcggttcttccctgcgcatgtctgccgagatttgtgggtataagaagagggttgttcagggagaagaagaacgtagcgcaggtgaaggagcagagggcttggaAGGTGCGGGTGCAGGTGCAGAtgaatgccatttt	eun-MIR530-p5	gaagaagaacgtagcgca	5'	New	gp2b	((.((((((....(((....((..((((((((.....))..))))))...)).)))....)))))))).	68	47.8	-14.1	0.4	7.5	16	0	0	0	0	7.95412	16.052	0	0	0	0	middle
122	91	eun-MIR530-p5_2ss3AT17CA	GATGAAGAACGTAGCGAA	18	NW_015901303.1	+	18633	18696	atctcggctctcgcatcGATGAAGAACGTAGCGAAatgcgatacttggtgtgaattgcagaatc	1	eun-MIR530,	eun-MIR530	aaggtgcagcctttaTCTGCATTTGCACCTGCACCTcaaattgctttcggttcttccctgcgcatgtctgccgagatttgtgggtataagaagagggttgttcagggagaagaagaacgtagcgcaggtgaaggagcagagggcttggaAGGTGCGGGTGCAGGTGCAGAtgaatgccatttt	eun-MIR530-p5	gaagaagaacgtagcgca	5'	New	gp2b	...((.((..(((((((((.......((((......))))....)))))))))...)).))...	58	46.9	-14.4	0.5	7.5	16	0	0	0	0	7.95412	16.052	0	0	0	0	middle
123	92	bdi-miR530a_2ss8GA20AC	TGCATTTACACCTGCACCTCC	21	NW_015927617.1	+	34523	34546	atcTGCATTTACACCTGCACCTCC	9	osa-MIR530,bdi-MIR530a,bdi-MIR530b,gra-MIR530b,ppe-MIR530,fve-MIR530,eun-MIR530,tcc-MIR530a,tcc-MIR530b,	bdi-MIR530b	gtgatagtgattgagcTGCATTTGCACCTGCACCTACcaaggaatggtctacattcaccttgcatatgatgcatgtaagagcaaggatgtccttgaccctctcgctcttcctaggtgagtaggtgcagtggcagatgcagctcaatcacaagcac	bdi-miR530a	TGCATTTGCACCTGCACCTAC	3'	Diff	gp2b	...((((........)))).....	16	50	-2.5	0.2	33	23	47.5	46.5	20.5	51	34.9981	23.0748	45.5436	45.9982	19.7193	50.6794	middle
124	92	bdi-miR530a_2ss8GA20AC	TGCATTTACACCTGCACCTCC	21	NW_015929622.1	+	11301	11322	cTGCATTTGCACCTGCACCTCC	9	osa-MIR530,bdi-MIR530a,bdi-MIR530b,gra-MIR530b,ppe-MIR530,fve-MIR530,eun-MIR530,tcc-MIR530a,tcc-MIR530b,	bdi-MIR530b	gtgatagtgattgagcTGCATTTGCACCTGCACCTACcaaggaatggtctacattcaccttgcatatgatgcatgtaagagcaaggatgtccttgaccctctcgctcttcctaggtgagtaggtgcagtggcagatgcagctcaatcacaagcac	bdi-miR530a	TGCATTTGCACCTGCACCTAC	3'	Diff	gp2b	.((((........)))).....	16	59.1	-2.5	0.2	33	23	47.5	46.5	20.5	51	34.9981	23.0748	45.5436	45.9982	19.7193	50.6794	middle
125	93	ath-miR829-3p.1_2ss15AT23AT	AGCTCTGATACCAATTGATGGATT	24	NW_015790640.1	+	870	979	acttagttatctaattagatgtgagtgAGCTCTGATACCAATTGATGGATTattatatgcagcggaagcaatcccagtatcaaaatcacatgtaatttagacaactagca	1	ath-MIR829,	ath-MIR829	acgtcaaaattgattaacaaaaagtcaatgaatcattctaccaattgacttgtactttgaagctttgatttgaacctgtcaattggtatcaaagcttctaaatctttgaAGCTCTGATACCAAATGATGGAATCAAATTAAAGCTTCAAGGTAGtagtcatcttggcagagaaaagaaaaagcacttcgagtttaccatcttgat	ath-miR829-3p.1	AGCTCTGATACCAAATGATGGAAT	5'	Diff	gp2b	..((((((.((((((((.((((((.(((...(((...(((.....))).............((....)).....)))..)))...)))))).))).))))).))))))..	106	34.5	-28.3	0.7	2.5	4	4	4	3	2.5	2.65137	4.01301	3.83525	3.95683	2.88574	2.48428	low
126	93	ath-miR829-3p.1_2ss15AT23AT	AGCTCTGATACCAATTGATGGATT	24	NW_015910599.1	+	540	649	acttagttatctaattagatgtgagtgAGCTCTGATACCAATTGATGGATTattatatgcagcggaagcaatcccagtatcaaaatcacatgtaatttagacaactagca	1	ath-MIR829,	ath-MIR829	acgtcaaaattgattaacaaaaagtcaatgaatcattctaccaattgacttgtactttgaagctttgatttgaacctgtcaattggtatcaaagcttctaaatctttgaAGCTCTGATACCAAATGATGGAATCAAATTAAAGCTTCAAGGTAGtagtcatcttggcagagaaaagaaaaagcacttcgagtttaccatcttgat	ath-miR829-3p.1	AGCTCTGATACCAAATGATGGAAT	5'	Diff	gp2b	..((((((.((((((((.((((((.(((...(((...(((.....))).............((....)).....)))..)))...)))))).))).))))).))))))..	106	34.5	-28.3	0.7	2.5	4	4	4	3	2.5	2.65137	4.01301	3.83525	3.95683	2.88574	2.48428	low
127	94	ppe-miR858_1ss4GA	CTCATTGTCTGTTCGACCTTG	21	NW_015833138.1	-	14764	14790	gtCTCATTGTCTGTTCGACCTTGaaaa	3	ppe-MIR858,csi-MIR858,cme-MIR858,	ppe-MIR858	ggtgactgatttccatgctaaacctcgtcaagtgaacagttttctttcaggttatatctttatCTCGTTGTCTGTTCGACCTTGaacttcaacttcatttttattatttatatgcataattattcattctgaatctgcactgcaccctttccctgtccacacacactcacgaaaactaacatatagcagccgtttcgataaatcgaaatcaagtttaatcctctgcattttataacattgattgagtaagtagagatctcaagtttaggtcataaatcggaaagtaattattttgtggtaatgaactaataataagctgagatcaaggtcaaacaggcaacaaagttgaggtattagtaagaactgtttgcttgacgggggctttgtatggacatcaac…	ppe-miR858	CTCGTTGTCTGTTCGACCTTG	5'	Diff	gp2b	...(((..(((.....)))..)))...	21	40.7	-4.4	0.4	12.5	5	9	6	10	13	13.2569	5.01626	8.62931	5.93525	9.61915	12.9183	middle
128	94	ppe-miR858_1ss4GA	CTCATTGTCTGTTCGACCTTG	21	NW_015900620.1	+	21529	21606	CTCATTGTCTGTTCGACCTTGaaaatacaagttcttcatctactcacaaaccctagctactgttagtaacaaacacgt	3	ppe-MIR858,csi-MIR858,cme-MIR858,	ppe-MIR858	ggtgactgatttccatgctaaacctcgtcaagtgaacagttttctttcaggttatatctttatCTCGTTGTCTGTTCGACCTTGaacttcaacttcatttttattatttatatgcataattattcattctgaatctgcactgcaccctttccctgtccacacacactcacgaaaactaacatatagcagccgtttcgataaatcgaaatcaagtttaatcctctgcattttataacattgattgagtaagtagagatctcaagtttaggtcataaatcggaaagtaattattttgtggtaatgaactaataataagctgagatcaaggtcaaacaggcaacaaagttgaggtattagtaagaactgtttgcttgacgggggctttgtatggacatcaac…	ppe-miR858	CTCGTTGTCTGTTCGACCTTG	5'	Diff	gp2b	.....(((.((((.((.((((......)))).))..................(((((....))))).)))).)))...	70	38.5	-10.3	0.3	12.5	5	9	6	10	13	13.2569	5.01626	8.62931	5.93525	9.61915	12.9183	middle
129	95	ppe-miR858_L+1	TCTCGTTGTCTGTTCGACCTTG	22	NW_015859355.1	-	2047	2073	gTCTCATTGTCTGTTCGACCTTGaaaa	2	ppe-MIR858,cme-MIR858,	ppe-MIR858	ggtgactgatttccatgctaaacctcgtcaagtgaacagttttctttcaggttatatctttatCTCGTTGTCTGTTCGACCTTGaacttcaacttcatttttattatttatatgcataattattcattctgaatctgcactgcaccctttccctgtccacacacactcacgaaaactaacatatagcagccgtttcgataaatcgaaatcaagtttaatcctctgcattttataacattgattgagtaagtagagatctcaagtttaggtcataaatcggaaagtaattattttgtggtaatgaactaataataagctgagatcaaggtcaaacaggcaacaaagttgaggtattagtaagaactgtttgcttgacgggggctttgtatggacatcaac…	ppe-miR858	CTCGTTGTCTGTTCGACCTTG	5'	Diff	gp2b	...(((..(((.....)))..)))...	21	40.7	-4.4	0.4	3.5	0	2.5	3	3	6	3.71192	0	2.39703	2.96762	2.88574	5.96228	low
[truncated: 1,049 more rows]
