# Supplementary material for: Small RNA and Degradome Sequencing Reveal Important MicroRNA Function in Nicotiana tabacum Response to Bemisia tabaci
Source: MDPI journal article supplement (doi:10.3390/genes13020361), 2022-02-17
Supplement: s1 [file Supplementary Data S2. Unique miRNAs and their target genes annotation in Control or Infested_20220216.xlsx]

## Sheet: Unique miRNAs
UniquemiRNAs in Infested or Control. The expression of miRNAs were determined according to the mean value of Control and Infested groups. Fold change was obtained by dividing the mean of the expression of Infected group by the mean of Control. Statistical significance was evaluated using Student's t test, the P value colored with red was evaluated at P<0.01, and the blue was at P<0.05.
Known miRNAs only detected in Infested
Index	miR_name	miR_seq	up/down	fold_change(Infested(mean)/Control(mean))	log2(fold_change)	pvalue(t_test)	Control(mean)	Infested(mean)	Number of target genes
244	stu-MIR5303h-p5_2ss12TG24TC	ACTCTCCAAAAGTGTTGCCGCACC	up	inf	inf	0.185776	0	3.58002	14
252	mtr-miR171c	TGATTGAGCCGTGCCAATATT	up	inf	inf	0.187017	0	2.12125	15
284	lja-MIR11104-p5_1ss19GA	ATGGGTTTGGCTCGTTGGACCAGC	up	inf	inf	0.194903	0	1.98367	4
283	mdm-MIR169g-p3_1ss21GT	CAAGTTGTCCCTGGCTACATTT	up	inf	inf	0.194903	0	3.96735	1
293	stu-miR171c-3p	TGATTGAGCCGTGTCAATATC	up	inf	inf	0.199489	0	4.41341	17
298	nta-MIR477a-p3	GAGGTCTTTCGAGTGAGAGTGG	up	inf	inf	0.201482	0	4.89145	2
418	aof-miR5139a_L+2	TCGAAACCTGGCTCTGATACCA	up	inf	inf	0.272759	0	4.58446	0
471	nta-miR399a	CGCCAAAGGAGAGCTGCCCTG	up	3.24882	1.69991	0.315986	0.286643	0.931252	4
602	aof-MIR166b-p3_1ss18CA	TCGGACCAGGCTTCATTATT	up	inf	inf	0.42265	0	2.24447	25
613	aof-miR168b_L+1_1ss22CT	CTCGCTTGGTGCAGGTCGGGTT	up	inf	inf	0.42265	0	1.64868	21
622	ata-miR2118b-5p	TTCCCGATGCCTCCCATTCCTA	up	inf	inf	0.42265	0	7.37468	31
617	ata-miR528-5p	TGGAAGGGGCATGCAGAGGAG	up	inf	inf	0.42265	0	3.20638	16
614	bdi-miR444c	TGCAGTTGTTGTCTCAAGCTT	up	inf	inf	0.42265	0	4.48894	59
612	cme-miR156a_1ss1TC	CGACAGAAGAGAGTGAGCAC	up	inf	inf	0.42265	0	2.56511	91
625	gma-miR4995_L+1R+2_1ss7GA	TAGGCAATGGCTTGGTTAAGGGAA	up	inf	inf	0.42265	0	1.64868	3
619	mdm-miR1511	ACCTAGCTCTGATACCATGAA	up	inf	inf	0.42265	0	2.96762	13
620	mtr-miR2111a-5p_R+1_1ss21AT	TAATCTGCATCCTGAGGTTTTT	up	inf	inf	0.42265	0	2.30815	10
601	osa-miR160a-5p_R+2_1ss21AT	TGCCTGGCTCCCTGTATGCCTCT	up	inf	inf	0.42265	0	1.64868	30
621	osa-miR2118o_1ss1CT	TTCCTGATGCCTCCCAAGCCTA	up	inf	inf	0.42265	0	4.1683	5
624	osa-miR2275d	CTTGTTTTTCTCCAATATCTCA	up	inf	inf	0.42265	0	4.80957	52
599	osa-miR390-5p_R+1	AAGCTCAGGAGGGATAGCGCCT	up	inf	inf	0.42265	0	1.92383	7
626	osa-miR5497	CAGAATATCTGGGACGAGCAT	up	inf	inf	0.42265	0	3.20638	41
627	osa-miR5509	TAGGCATTTTCTCTTGGCATG	up	inf	inf	0.42265	0	2.56511	37
629	osa-miR5793	CGAGGACGAGATACAGTGCAG	up	inf	inf	0.42265	0	1.60319	6
630	osa-miR5796	TCATTCAGGATTGAAGCCGCC	up	inf	inf	0.42265	0	2.24447	12
631	osa-miR5818	TCGAACTAGAAGGGCCAGGTT	up	inf	inf	0.42265	0	2.24447	3
600	rgl-miR7972_2ss14TG21CT	TTGTCAGGCTTGTGATTCTCT	up	inf	inf	0.42265	0	2.63789	26
632	sly-miR10533_L+1R+1_1ss17GA	ATCTTATGAATTCTAGATCTTCTT	up	inf	inf	0.42265	0	2.24447	86
598	sly-miR390a-5p_R+1_1ss19AG	AAGCTCAGGAGGGATAGCGCCT	up	inf	inf	0.42265	0	1.92383	7
615	sly-miR482a_L+3	ATCTTTCCAATTCCACCCATTCCTA	up	inf	inf	0.42265	0	1.64868	3
594	ssl-MIR171a-p3	TATTTGATTGAGCCGTGCCAA	up	inf	inf	0.42265	0	1.60319	8
596	stu-miR167a-3p_L+4_1ss18CT	ATCAGATCATGTGGCAGTCTCACC	up	inf	inf	0.42265	0	1.64868	2
595	stu-MIR319b-p5	AGCTCCTTTCAGGCCAAGACC	up	inf	inf	0.42265	0	2.24447	7
603	stu-MIR395f-p5_1ss13AG	GTTCCCTTGACCGCTTCATGA	up	inf	inf	0.42265	0	1.64868	23
604	stu-miR477a-5p	CCTCTCCCTCAAGGGCTTCTC	up	inf	inf	0.42265	0	2.14328	21
623	zma-miR2275b-3p_1ss22AG	TTCAGTTTCCTCTAATATCTCG	up	inf	inf	0.42265	0	5.45085	32
Known miRNAs only detected in Control
Index	miR_name	miR_seq	up/down	fold_change(Infested(mean)/Control(mean))	log2(fold_change)	pvalue(t_test)	Control(mean)	Infested(mean)	Number of target genes
597	bdi-MIR171e-p3	TTGAGCCGTGCCAATATCTCT	down	-inf	-inf	0.42265	0.883791	0	20
382	bdi-MIR7756-p5_2ss15AC20AT	TTGGAGATGTTGGCCTTGATT	down	-inf	-inf	0.246532	2.74335	0	15
618	csi-miR536-3p_1ss20TA	TGGTGCCACGCTGTGTGCGAC	down	-inf	-inf	0.42265	0.836043	0	2
341	eun-MIR530-p5_2ss3AT17CA	GATGAAGAACGTAGCGAA	down	-inf	-inf	0.226335	8.00205	0	64
607	gma-miR6300_R+2_1	GTCGTTGTAGTATAGTGGTA	down	-inf	-inf	0.42265	2.34092	0	5
606	gma-miR6300_R+2_2	GTCGTTGTAGTATAGTGGTG	down	-inf	-inf	0.42265	2.34092	0	11
605	gma-MIR6300-p3_1ss12AG	AGTATAGTGGTGAGTATTCCCGCC	down	-inf	-inf	0.42265	2.0065	0	15
616	gra-miR482d_R-2_1ss12CA	TTTCCTATGCCACCCATTCC	down	-inf	-inf	0.42265	1.76758	0	84
234	hbr-MIR6173-p3_1	GCTGTGCGTATCGACCCGTG	down	-inf	-inf	0.184538	2.01936	0	1
27	hbr-MIR6173-p3_2ss18GA19CG	CGTAAACGATGGATACTAG	down	-inf	-inf	0.0240834	6.66962	0	11
337	mtr-miR159a_L+1R-1	CTTTGGATTGAAGGGAGCTCT	down	-inf	-inf	0.222455	3.29233	0	49
628	osa-miR5538_R+2	ACTGAACTCAATCACTTGCTGCCG	down	-inf	-inf	0.42265	1.67209	0	0
233	ptc-miR171e_R+2_1ss21CT	TGATTGAGCCGTGCCAATATTTT	down	-inf	-inf	0.184538	3.3656	0	15
315	rgl-miR7972	TTGTCAGGCTTGTTATTCTCC	down	-inf	-inf	0.20918	2.25011	0	14
397	rgl-miR7972_R+1_1ss14TG	TTGTCAGGCTTGTGATTCTCCA	down	-inf	-inf	0.258874	5.25986	0	10
608	rgl-miR7972_R+3_1ss14TG	TTGTCAGGCTTGTGATTCTCCTTC	down	-inf	-inf	0.42265	1.00325	0	8
609	sly-MIR7981d-p5_1ss8TC	ATAAGTTCAGGAGGTAATAGGACC	down	-inf	-inf	0.42265	1.76758	0	3
610	sly-MIR9479-p3_2ss22GA24TG	TTTAAGTGGAGAATGGTAGAGAGG	down	-inf	-inf	0.42265	1.76758	0	25
611	sly-MIR9479-p5_2ss22GA24TG	TTTAAGTGGAGAATGGTAGAGAGG	down	-inf	-inf	0.42265	1.76758	0	25
399	stu-MIR7997a-p5_2ss11CT19TG	TCAAAAATGCTGTTGGGTGCGTGT	down	-inf	-inf	0.260044	3.1339	0	18
294	vvi-MIR156h-p5_2ss13GT22TC	AATGACAGAAGATAGAGAGCAC	down	-inf	-inf	0.20003	4.44292	0	61
Novel miRNAs only detected in Infested
Index	miR_name	miR_seq	up/down	fold_change(Infested(mean)/Control(mean))	log2(fold_change)	pvalue(t_test)	Control(mean)	Infested(mean)	Number of target genes
1	PC-5p-244240_18	AAACCCGCTCCCGTCACTTTAGTT	up	inf	inf	0.000102408	0	5.88967	4
19	PC-3p-202629_23	TTTTCTTGAGGCTGTTAGGGATGT	up	inf	inf	0.0206263	0	7.50196	1
37	PC-3p-258597_16	GTATCCTGCATCTTCTCTTTC	up	inf	inf	0.0404165	0	3.42125	59
42	PC-5p-216933_21	TAGTTTCGCCCCTAGAGCATA	up	inf	inf	0.04644	0	6.88798	1
54	PC-5p-190416_26	AATATACTGGACATTGATGCACCT	up	inf	inf	0.0580095	0	8.14699	0
72	PC-3p-212676_22	CGGGAGTCTTGGCTTGAGGGTG	up	inf	inf	0.0690879	0	10.4846	2
74	PC-3p-227053_20	AGGATCTGACACGGGCGTGACAGT	up	inf	inf	0.0710369	0	14.3944	9
76	PC-3p-219431_21	TTAGACATGTCTTTTGACCCGACC	up	inf	inf	0.0748447	0	6.88648	0
114	PC-5p-196729_24	TTTTAATAAAGTCCCATGCCT	up	inf	inf	0.11086	0	7.79381	24
219	PC-3p-310612_12	ACTAATGTCAGTTGTGTGTGAGGC	up	inf	inf	0.183506	0	3.96584	0
221	PC-3p-401061_7	AGACGACATGGATATTTTTGGTAC	up	inf	inf	0.183506	0	4.62682	0
218	PC-3p-521829_6	AAACTGTGAGACAAAAAAGATGCC	up	inf	inf	0.183506	0	3.96584	3
217	PC-3p-546606_5	AGGTCAATAGGACGATGACACGTG	up	inf	inf	0.183506	0	3.30487	1
220	PC-5p-315142_12	ATGTCCGTCGTTATTAGTTTGGCC	up	inf	inf	0.183506	0	3.96584	2
223	PC-3p-347993_10	ATTATCGTCTCTCGGTGCTACGTT	up	inf	inf	0.183583	0	3.25187	4
224	PC-3p-356804_10	AACATGTTATGCTGGAAGTTCACA	up	inf	inf	0.183583	0	3.25187	1
225	PC-5p-348502_10	AAGAATTATTTGCACTATCATGTT	up	inf	inf	0.183583	0	3.25187	1
222	PC-5p-363231_10	AAAAAAGTCTCTAGAGCTTACGCC	up	inf	inf	0.183583	0	3.25187	0
227	PC-3p-344533_10	ACAGAGGATTATGATTGAAGGATC	up	inf	inf	0.183611	0	3.25938	0
226	PC-5p-557496_5	AAGGGTCGGGTCAAAAAACATGTA	up	inf	inf	0.183611	0	3.25938	0
232	PC-5p-250550_17	TCTATGTTTGACAAGTGGAAT	up	inf	inf	0.184324	0	2.76182	15
243	PC-5p-426366_7	ATAGCACGGTATTTCACCGCA	up	inf	inf	0.18577	0	4.29558	2
245	PC-5p-440805_6	ATACTAGAGTTCGGTGCATCTGTG	up	inf	inf	0.185776	0	3.58002	3
246	PC-3p-452378_6	ATTGAAATACCAAGATACCGAGAT	up	inf	inf	0.185914	0	3.57251	1
247	PC-3p-309582_12	AAAGATACCTCATACAACTAGTCT	up	inf	inf	0.186174	0	7.93019	4
251	PC-3p-289777_13	AATCGAATACCGAACCGAAGTACC	up	inf	inf	0.18685	0	4.23198	2
250	PC-5p-294893_13	TCTCATTGGTGATATCGTGACT	up	inf	inf	0.18685	0	2.11599	13
253	PC-3p-292422_13	ATACCTTACCCCTACATTGTGAGA	up	inf	inf	0.187017	0	4.24249	40
254	PC-5p-321026_11	AACCTATGTTACTTGGACTCTCCA	up	inf	inf	0.187024	0	3.63611	11
272	PC-3p-389561_8	TTTGAGGAGTTCGAGCAACATAGC	up	inf	inf	0.189998	0	4.55253	38
276	PC-5p-282423_14	GAAACTCCGTCACATTATGCTGGA	up	inf	inf	0.191865	0	6.16491	0
279	PC-3p-436954_7	AAACAAGATAAGAATTTTCTAGCC	up	inf	inf	0.1929	0	3.89315	3
280	PC-3p-278043_14	ATTTGTACCTCTAACCAAACAAGG	up	inf	inf	0.193601	0	4.57373	1
285	PC-3p-318152_12	ATTCAGGATCTTAAAGCAACCGAG	up	inf	inf	0.194903	0	3.96735	0
286	PC-5p-302557_12	TTAGGCTCCAAGAATCAAGATA	up	inf	inf	0.194903	0	3.96735	4
289	PC-3p-318504_12	AGGGGTTTCCAGAACCGTCGTGCC	up	inf	inf	0.196761	0	3.92186	0
300	PC-3p-298296_13	AAAGAGCCTCATACAACTAGTGTA	up	inf	inf	0.202154	0	2.10689	3
299	PC-5p-376545_8	AACCCGTAGCTCGTGCTCTAGC	up	inf	inf	0.202154	0	4.21379	2
307	PC-5p-382125_8	ATTCACCACTGATACGGGCCGAGA	up	inf	inf	0.204789	0	4.29858	0
322	PC-5p-232412_19	AGGGCTGTTATTTAGGGATTAGTC	up	inf	inf	0.209977	0	6.2755	4
326	PC-3p-253061_17	TTGATACTGTGACTCTTTTCT	up	inf	inf	0.213579	0	5.51445	14
328	PC-3p-209730_22	GTGCCTCTGTCTTTCGACACG	up	inf	inf	0.214901	0	3.59071	7
344	PC-3p-608282_5	AAAAAGAGGCCTCACACGACTAGT	up	inf	inf	0.228794	0	2.45779	7
368	PC-5p-359346_10	ACTGGAGTTCCGGTATACTTTGCT	up	inf	inf	0.238526	0	5.23029	1
412	PC-3p-281140_14	AGCTCTAGAGCTGAAGTCTGAGGC	up	inf	inf	0.270201	0	6.61725	0
420	PC-5p-218998_21	TATTGATGCGACTCAATCTGA	up	inf	inf	0.273692	0	3.38945	6
668	PC-3p-292184_13	TTACATGGCTGAAAAGTGACC	up	inf	inf	0.42265	0	4.1683	9
670	PC-3p-364351_10	AAGGTATAGCACGGTGAATAACTA	up	inf	inf	0.42265	0	3.29736	0
674	PC-3p-385210_8	AGACATGTTTTTTGACCCGACCCA	up	inf	inf	0.42265	0	2.63789	1
684	PC-3p-432095_7	ATAACGGTAGGGATAAACTTGACC	up	inf	inf	0.42265	0	2.30815	0
647	PC-3p-437810_7	TTACATTCAAGGCGAGTAAAC	up	inf	inf	0.42265	0	2.30815	10
656	PC-3p-488416_6	TGTAAATAGTTTCTGATGCGGGCT	up	inf	inf	0.42265	0	1.97842	9
666	PC-3p-538611_6	TAATATATTAGTTGAATTTT	up	inf	inf	0.42265	0	1.92383	35
686	PC-3p-551973_5	ATTCGAACTCTAGTGTATTATGCT	up	inf	inf	0.42265	0	1.60319	0
643	PC-3p-561102_5	ACCCTACACTTCTCTCAACTACA	up	inf	inf	0.42265	0	1.60319	0
677	PC-3p-586735_5	AGGCCTCATACAACTATTGTCAGT	up	inf	inf	0.42265	0	3.20638	2
680	PC-3p-625479_5	AGACTTAAGTTCAGCAGCAATATC	up	inf	inf	0.42265	0	1.64868	2
662	PC-3p-701406_5	AACTAATGACCGTATATTTTGTTG	up	inf	inf	0.42265	0	1.60319	0
636	PC-3p-716680_5	ATTTTTGAATGGAAGGCCCATGTGT	up	inf	inf	0.42265	0	0.801596	0
646	PC-3p-721918_5	ACTACCTAATTTCTAAATAACAGC	up	inf	inf	0.42265	0	1.60319	6
657	PC-3p-752626_5	CGAACTCACCGATACAAAGGTT	up	inf	inf	0.42265	0	1.60319	2
683	PC-5p-291068_13	AATTTCGGAAGAATTTTTATCAAC	up	inf	inf	0.42265	0	4.1683	20
678	PC-5p-328196_11	ATTTAAGATAATTTAACCCCGCCC	up	inf	inf	0.42265	0	3.6271	0
676	PC-5p-328551_11	AAAGTTATGTTGCACGGACTCTTC	up	inf	inf	0.42265	0	3.52702	8
651	PC-5p-355917_10	AATGTAAAAGTGTGGTAGATTAGC	up	inf	inf	0.42265	0	1.60319	2
650	PC-5p-364313_10	AAAAATCTCTTTGAACACAATATT	up	inf	inf	0.42265	0	1.60319	1
679	PC-5p-390595_8	TATTAAAGCAATTCGCAGTAC	up	inf	inf	0.42265	0	4.28657	4
659	PC-5p-390918_8	AGCGTTAATCGGGAAGAAAGAACT	up	inf	inf	0.42265	0	2.56511	0
649	PC-5p-394558_8	CTTGATATTTATTCCTGCAAT	up	inf	inf	0.42265	0	2.56511	24
660	PC-5p-443247_6	ATGTTATGCTGGAACTCCAATATA	up	inf	inf	0.42265	0	1.92383	0
682	PC-5p-469429_6	ATAGCCATTGTACTGGAGTTT	up	inf	inf	0.42265	0	3.52702	11
665	PC-5p-485288_6	TATCGGCAAGTCTGACACAAG	up	inf	inf	0.42265	0	1.92383	4
681	PC-5p-494365_6	TATTAAAGCAATTCGCAGTACTAT	up	inf	inf	0.42265	0	1.97842	0
685	PC-5p-496669_6	AAAACCTCTCTGTAACAACCTCGT	up	inf	inf	0.42265	0	3.95683	11
640	PC-5p-516273_6	ATACGGAGAAACGCGGTAGAG	up	inf	inf	0.42265	0	0.961915	5
673	PC-5p-519052_6	ATACTCATCTTGTGGATATCTTGG	up	inf	inf	0.42265	0	1.97842	6
669	PC-5p-535875_6	ACCGGAACTCCAGTATAATATGCT	up	inf	inf	0.42265	0	1.92383	0
655	PC-5p-572607_5	ATGCCCCCACCAGAAACTATTTAC	up	inf	inf	0.42265	0	1.64868	0
663	PC-5p-654008_5	GTGCCTCACACAACTGACACTAGT	up	inf	inf	0.42265	0	1.64868	2
658	PC-5p-691387_5	AGCGTGGGGGACATATGGAATACC	up	inf	inf	0.42265	0	1.60319	0
641	PC-5p-697344_5	AACTGACATTAGTTGTGCGAGACC	up	inf	inf	0.42265	0	1.60319	3
667	PC-5p-733653_5	TTTTCGTGGTCGGAAAGGCATACC	up	inf	inf	0.42265	0	1.60319	0
Novel miRNAs only detected in Control
Index	miR_name	miR_seq	up/down	fold_change(Infested(mean)/Control(mean))	log2(fold_change)	pvalue(t_test)	Control(mean)	Infested(mean)	Number of target genes
4	PC-5p-181486_27	ACCCATTGTGGAGTTGTTGGGCTA	down	-inf	-inf	0.00725795	7.36068	0	0
5	PC-3p-258573_16	AATGTCGTGTCCTAAAGTTTGAGC	down	-inf	-inf	0.00816831	5.39121	0	0
8	PC-5p-135574_40	TCGCCTGATAATGCTCTTAAA	down	-inf	-inf	0.0155792	13.4071	0	10
229	PC-5p-334291_11	AAACTTCTTTATAACAGCCTCGTT	down	-inf	-inf	0.184179	3.68521	0	8
235	PC-3p-308773_12	ACTGGAAACTTTAGCTCTAGAACT	down	-inf	-inf	0.184538	4.03872	0	0
236	PC-5p-473015_6	AGTTATGTGAGGCTCCTTGTTGTC	down	-inf	-inf	0.184538	4.03872	0	2
237	PC-3p-345307_10	AGAGACCGGCCCGGGACCGTAACC	down	-inf	-inf	0.184538	3.3656	0	0
238	PC-3p-680797_5	TTTACTCTGTCAATGTATATAAC	down	-inf	-inf	0.184538	3.3656	0	15
239	PC-5p-357586_10	ATTCGATAGCCGGAAGAGTGTATA	down	-inf	-inf	0.184538	3.3656	0	1
241	PC-5p-334700_11	AACGGTCCAGTATAATATGCTTGA	down	-inf	-inf	0.185407	3.58971	0	0
249	PC-3p-252142_17	GACCGCGGTTTCTCTGTATAAC	down	-inf	-inf	0.186537	2.92849	0	0
256	PC-5p-289365_13	AAAGTATTTCGTGTTCATGCAGGA	down	-inf	-inf	0.187507	4.25855	0	49
258	PC-5p-249931_17	TTTTCTTTCCGGTATAATGCT	down	-inf	-inf	0.188301	2.86924	0	7
259	PC-3p-531379_6	AAAGTTGGGTAACGTTGAGGGTGG	down	-inf	-inf	0.188696	3.60452	0	0
268	PC-5p-338762_11	TCCAAGGGTCTTTCCTCCAAG	down	-inf	-inf	0.189164	3.79318	0	12
269	PC-3p-227165_20	AAGAAAGCATCTGACATCCCT	down	-inf	-inf	0.189549	6.55503	0	4
277	PC-5p-421971_7	CTATTGGCCAGGTTCACTCAGA	down	-inf	-inf	0.191904	1.95466	0	3
290	PC-5p-286224_13	TATGTTGCGCGGGACTCTCCG	down	-inf	-inf	0.196772	4.32442	0	3
312	PC-5p-298790_13	TTTTGAAGGGTCCGCGCAATA	down	-inf	-inf	0.208275	4.27336	0	65
313	PC-3p-375241_8	AATGGCATGGATGGACCAAATGTG	down	-inf	-inf	0.208275	2.13668	0	0
316	PC-5p-377005_8	ATTGCTCGGACTTTCCAAAATGTT	down	-inf	-inf	0.20918	4.50022	0	22
317	PC-5p-290883_13	AGGTATAGCGTCGTTTATTAAGGC	down	-inf	-inf	0.20918	4.50022	0	0
321	PC-5p-277595_14	ATCTCCCGGGATAGTTGAAACATC	down	-inf	-inf	0.209779	4.77734	0	2
325	PC-3p-296966_13	ATGGGTCCACAAAACTATGAAACA	down	-inf	-inf	0.21332	4.42615	0	3
333	PC-3p-280253_14	CATGGGAGCGACAACGAAATTC	down	-inf	-inf	0.219322	4.60778	0	2
633	PC-3p-449386_6	AACTGTGGTCCTCAGAGGGA	down	-inf	-inf	0.42265	1.00325	0	19
634	PC-5p-385124_8	TCCCTCTTGAGGACCACAGATT	down	-inf	-inf	0.42265	2.67534	0	1
635	PC-5p-746285_5	TATGCATGGTCTTTTCTTTCAAAA	down	-inf	-inf	0.42265	0.836043	0	1
637	PC-3p-411347_7	TTCTTTTTATTGGACTGCTCA	down	-inf	-inf	0.42265	1.23731	0	42
638	PC-5p-681191_5	TGAAAGAGAAGATGCAGGATAC	down	-inf	-inf	0.42265	0.836043	0	26
639	PC-3p-376979_8	TGGAAATCAAGAATATAAAGC	down	-inf	-inf	0.42265	1.33767	0	46
642	PC-5p-546196_5	TATTTTGTTTGTATGCCCCATCCG	down	-inf	-inf	0.42265	1.76758	0	0
644	PC-5p-410416_7	CTTCGGTCAAGATCTTCCATC	down	-inf	-inf	0.42265	2.34092	0	42
645	PC-3p-554535_5	TCCAAATGACTGACATTATC	down	-inf	-inf	0.42265	1.76758	0	26
648	PC-5p-376942_8	ACATTAGTTGTGTGAGGCTCTTT	down	-inf	-inf	0.42265	2.67534	0	4
652	PC-5p-496284_6	ATTTCATGCCACTACCGTTACACA	down	-inf	-inf	0.42265	1.83929	0	0
653	PC-5p-540207_5	AAGAGAAGATGCAGGATACAA	down	-inf	-inf	0.42265	0.836043	0	47
654	PC-5p-714549_5	TCCGTTTGTATTCTTTCCGCT	down	-inf	-inf	0.42265	0.883791	0	19
661	PC-5p-460309_6	ACAAAATATATGATCTTTAGTTAC	down	-inf	-inf	0.42265	4.01301	0	6
664	PC-5p-655685_5	TTATTTAAACAGAGGGACACGTGT	down	-inf	-inf	0.42265	1.76758	0	1
671	PC-5p-473213_6	AAGGTTCAAATCCTCGATCCGCCT	down	-inf	-inf	0.42265	2.0065	0	23
672	PC-3p-719191_5	TTCGATCTACTCCCTACATCT	down	-inf	-inf	0.42265	1.76758	0	3
675	PC-3p-419453_7	AATCCTCGCCCTCCATTTTTC	down	-inf	-inf	0.42265	4.2422	0	30
687	PC-5p-502914_6	ATTTCATGGCACTACCGTTATACA	down	-inf	-inf	0.42265	3.00975	0	0

## Sheet: Unique known miRNAs in Infested
Target genes annotation of unique known miRNAs in Infested.
miRNA ID	Transcript ID	Gene ID	Symbol	Gene annotation	Range	Score	GO	KEGG
stu-MIR5303h-p5_2ss12TG24TC	XM_016600464.1	XM_016600464.1	HIPP44	-	577-600	2.5	GO:0005737(cytoplasm);GO:0030001(metal ion transport);GO:0046914(transition metal ion binding);GO:0046916(cellular transition metal ion homeostasis)
stu-MIR5303h-p5_2ss12TG24TC	XM_016577413.1	XM_016577413.1	PGAAIR	ribosomal protein S4	6788-6811	0.5	GO:0003677(DNA binding);GO:0005634(nucleus);GO:0005694(chromosome);GO:0005737(cytoplasm);GO:0006260(DNA replication);GO:0006284(base-excision repair);GO:0006302(double-strand break repair);GO:0006310(DNA recombination);GO:0009378(four-way junction helicase activity);GO:0032508(DNA duplex unwinding);GO:0043140(ATP-dependent 3'-5' DNA helicase activity)	ko03010(Ribosome)
stu-MIR5303h-p5_2ss12TG24TC	XM_016644035.1	XM_016644035.1	At4g17910	uncharacterized protein At4g17910	584-608	2	GO:0005739(mitochondrion);GO:0005789(endoplasmic reticulum membrane);GO:0006506(GPI anchor biosynthetic process);GO:0016021(integral component of membrane);GO:0016746(transferase activity, transferring acyl groups)	ko00563(Glycosylphosphatidylinositol)
stu-MIR5303h-p5_2ss12TG24TC	XM_016644027.1	XM_016644027.1	At4g17910	uncharacterized protein At4g17910	583-607	2	GO:0004596(peptide alpha-N-acetyltransferase activity);GO:0005737(cytoplasm);GO:0017196(N-terminal peptidyl-methionine acetylation)	ko00563(Glycosylphosphatidylinositol)
stu-MIR5303h-p5_2ss12TG24TC	XM_016644022.1	XM_016644022.1	At4g17910	uncharacterized protein At4g17910	576-600	2	GO:0005739(mitochondrion);GO:0005789(endoplasmic reticulum membrane);GO:0006506(GPI anchor biosynthetic process);GO:0016021(integral component of membrane);GO:0016746(transferase activity, transferring acyl groups)	ko00563(Glycosylphosphatidylinositol)
stu-MIR5303h-p5_2ss12TG24TC	XM_016594319.1	XM_016594319.1	GN	ARF guanine-nucleotide exchange factor GNOM-like	580-603	2.5	GO:0005086(ARF guanyl-nucleotide exchange factor activity);GO:0005802(trans-Golgi network);GO:0016192(vesicle-mediated transport)	ko04144(Endocytosis)
stu-MIR5303h-p5_2ss12TG24TC	XM_016581946.1	XM_016581946.1	At3g04930	-	1866-1889	2	GO:0003677(DNA binding);GO:0005634(nucleus);GO:0006355(regulation of transcription, DNA-templated)
stu-MIR5303h-p5_2ss12TG24TC	XM_016613392.1	XM_016613392.1	wdr44	cleavage stimulation factor subunit 50	3290-3313	2.2	GO:0000159(protein phosphatase type 2A complex);GO:0004871(signal transducer activity);GO:0005634(nucleus);GO:0005834(heterotrimeric G-protein complex);GO:0007165(signal transduction);GO:0008601(protein phosphatase type 2A regulator activity)	ko03015(mRNA surveillance pathway)
stu-MIR5303h-p5_2ss12TG24TC	XM_016613391.1	XM_016613391.1	wdr44	cleavage stimulation factor subunit 50	3033-3056	2.2	GO:0000159(protein phosphatase type 2A complex);GO:0004871(signal transducer activity);GO:0005634(nucleus);GO:0005834(heterotrimeric G-protein complex);GO:0007165(signal transduction);GO:0008601(protein phosphatase type 2A regulator activity)	ko03015(mRNA surveillance pathway)
stu-MIR5303h-p5_2ss12TG24TC	XM_016638498.1	XM_016638498.1	UBC37	hypothetical protein	1356-1379	2	GO:0000209(protein polyubiquitination);GO:0005634(nucleus);GO:0005737(cytoplasm);GO:0006974(cellular response to DNA damage stimulus);GO:0031625(ubiquitin protein ligase binding);GO:0061630(ubiquitin protein ligase activity)	ko04141(Protein processing in endoplasmic reticulum);ko04120(Ubiquitin mediated proteolysis)
stu-MIR5303h-p5_2ss12TG24TC	XM_016655093.1	XM_016655093.1	BAM2	hypothetical protein	756-779	1	GO:0004674(protein serine/threonine kinase activity);GO:0005524(ATP binding);GO:0005886(plasma membrane);GO:0006468(protein phosphorylation);GO:0016020(membrane);GO:0016021(integral component of membrane);GO:0016301(kinase activity)	ko04075(Plant hormone signal transduction)
stu-MIR5303h-p5_2ss12TG24TC	XM_016635154.1	XM_016635154.1	WRKY33	probable WRKY transcription factor 26	2289-2313	2	GO:0003674(molecular_function);GO:0005737(cytoplasm);GO:0008150(biological_process)	ko04626(Plant-pathogen interaction)
stu-MIR5303h-p5_2ss12TG24TC	XM_016635674.1	XM_016635674.1	CERK1	chitin elicitor receptor kinase 1-like	3208-3231	1.5	GO:0002237(response to molecule of bacterial origin);GO:0005515(protein binding);GO:0005775(vacuolar lumen);GO:0005886(plasma membrane);GO:0006486(protein glycosylation);GO:0009877(nodulation);GO:1900150(regulation of defense response to fungus);GO:1902290(positive regulation of defense response to oomycetes)	ko04626(Plant-pathogen interaction)
stu-MIR5303h-p5_2ss12TG24TC	XM_016606337.1	XM_016606337.1	-	-	1561-1584	1	GO:0003674(molecular_function);GO:0005886(plasma membrane);GO:0008150(biological_process);GO:0016021(integral component of membrane)
mtr-miR171c	XM_016577663.1	XM_016577663.1	SCL15	DELLA protein GAI1-like	882-902	1.2	GO:0003700(transcription factor activity, sequence-specific DNA binding);GO:0005634(nucleus);GO:0006355(regulation of transcription, DNA-templated);GO:0030154(cell differentiation);GO:0043565(sequence-specific DNA binding);GO:0048831(regulation of shoot system development)	ko04075(Plant hormone signal transduction)
mtr-miR171c	XM_016625781.1	XM_016625781.1	SCL6	DELLA protein GAI-like	1710-1730	0.8	GO:0003700(transcription factor activity, sequence-specific DNA binding);GO:0005634(nucleus);GO:0006355(regulation of transcription, DNA-templated);GO:0010492(maintenance of shoot apical meristem identity);GO:0043565(sequence-specific DNA binding);GO:0048768(root hair cell tip growth);GO:0051301(cell division)	ko04075(Plant hormone signal transduction)
mtr-miR171c	XM_016625782.1	XM_016625782.1	SCL6	DELLA protein GAI-like	1700-1720	0.8	GO:0003700(transcription factor activity, sequence-specific DNA binding);GO:0005634(nucleus);GO:0006355(regulation of transcription, DNA-templated);GO:0010492(maintenance of shoot apical meristem identity);GO:0043565(sequence-specific DNA binding);GO:0048768(root hair cell tip growth);GO:0051301(cell division)	ko04075(Plant hormone signal transduction)
mtr-miR171c	XM_016588934.1	XM_016588934.1	SCL15	hypothetical protein	895-915	1.2	GO:0003700(transcription factor activity, sequence-specific DNA binding);GO:0005634(nucleus);GO:0006355(regulation of transcription, DNA-templated);GO:0030154(cell differentiation);GO:0043565(sequence-specific DNA binding);GO:0048831(regulation of shoot system development)	ko04075(Plant hormone signal transduction)
mtr-miR171c	XM_016582020.1	XM_016582020.1	SCL6	DELLA protein RGL2	1387-1407	0.8	GO:0003700(transcription factor activity, sequence-specific DNA binding);GO:0005634(nucleus);GO:0006355(regulation of transcription, DNA-templated);GO:0030154(cell differentiation);GO:0043565(sequence-specific DNA binding)	ko04075(Plant hormone signal transduction)
mtr-miR171c	XM_016582022.1	XM_016582022.1	SCL6	DELLA protein RGL2	1303-1323	0.8	GO:0003700(transcription factor activity, sequence-specific DNA binding);GO:0005634(nucleus);GO:0006355(regulation of transcription, DNA-templated);GO:0030154(cell differentiation);GO:0043565(sequence-specific DNA binding)	ko04075(Plant hormone signal transduction)
mtr-miR171c	XM_016582024.1	XM_016582024.1	SCL6	DELLA protein RGL2	1058-1078	0.8	GO:0003700(transcription factor activity, sequence-specific DNA binding);GO:0005634(nucleus);GO:0006355(regulation of transcription, DNA-templated);GO:0030154(cell differentiation);GO:0043565(sequence-specific DNA binding)	ko04075(Plant hormone signal transduction)
mtr-miR171c	XM_016582023.1	XM_016582023.1	SCL6	DELLA protein RGL2	1226-1246	0.8	GO:0003700(transcription factor activity, sequence-specific DNA binding);GO:0005634(nucleus);GO:0006355(regulation of transcription, DNA-templated);GO:0030154(cell differentiation);GO:0043565(sequence-specific DNA binding)	ko04075(Plant hormone signal transduction)
mtr-miR171c	XM_016582267.1	XM_016582267.1	ABCC10	ABC transporter C family member 10-like	4035-4056	2	GO:0005524(ATP binding);GO:0005774(vacuolar membrane);GO:0005886(plasma membrane);GO:0008559(xenobiotic-transporting ATPase activity);GO:0016021(integral component of membrane);GO:0042626(ATPase activity, coupled to transmembrane movement of substances)	ko02010(ABC transporters)
mtr-miR171c	XM_016582268.1	XM_016582268.1	ABCC10	ABC transporter C family member 10-like	4027-4048	2	GO:0005524(ATP binding);GO:0005774(vacuolar membrane);GO:0005886(plasma membrane);GO:0008559(xenobiotic-transporting ATPase activity);GO:0016021(integral component of membrane);GO:0042626(ATPase activity, coupled to transmembrane movement of substances)	ko02010(ABC transporters)
mtr-miR171c	XM_016631827.1	XM_016631827.1	SCL6	DELLA protein RGL2	1376-1396	0.8	GO:0003700(transcription factor activity, sequence-specific DNA binding);GO:0005634(nucleus);GO:0006355(regulation of transcription, DNA-templated);GO:0030154(cell differentiation);GO:0043565(sequence-specific DNA binding)	ko04075(Plant hormone signal transduction)
mtr-miR171c	XM_016631828.1	XM_016631828.1	SCL6	DELLA protein RGL2	1226-1246	0.8	GO:0003700(transcription factor activity, sequence-specific DNA binding);GO:0005634(nucleus);GO:0006355(regulation of transcription, DNA-templated);GO:0030154(cell differentiation);GO:0043565(sequence-specific DNA binding)	ko04075(Plant hormone signal transduction)
mtr-miR171c	XM_016635528.1	XM_016635528.1	SCL6	hypothetical protein	1686-1706	0.8	GO:0003700(transcription factor activity, sequence-specific DNA binding);GO:0005634(nucleus);GO:0006355(regulation of transcription, DNA-templated);GO:0010492(maintenance of shoot apical meristem identity);GO:0043565(sequence-specific DNA binding);GO:0048768(root hair cell tip growth);GO:0051301(cell division)	ko04075(Plant hormone signal transduction)
mtr-miR171c	XM_016635712.1	XM_016635712.1	ABCC10	ABC transporter C family member 10-like	4071-4092	2.2	GO:0005524(ATP binding);GO:0005774(vacuolar membrane);GO:0005886(plasma membrane);GO:0008559(xenobiotic-transporting ATPase activity);GO:0016021(integral component of membrane);GO:0042626(ATPase activity, coupled to transmembrane movement of substances)	ko02010(ABC transporters)
mtr-miR171c	XM_016635713.1	XM_016635713.1	ABCC10	ABC transporter C family member 10-like	4080-4101	2.2	GO:0005524(ATP binding);GO:0005774(vacuolar membrane);GO:0005886(plasma membrane);GO:0008559(xenobiotic-transporting ATPase activity);GO:0016021(integral component of membrane);GO:0042626(ATPase activity, coupled to transmembrane movement of substances)	ko02010(ABC transporters)
mdm-MIR169g-p3_1ss21GT	XM_016605003.1	XM_016605003.1	SFGH	S-formylglutathione hydrolase	977-998	2.5	GO:0005737(cytoplasm);GO:0016788(hydrolase activity, acting on ester bonds);GO:0018738(S-formylglutathione hydrolase activity);GO:0046294(formaldehyde catabolic process);GO:0046686(response to cadmium ion);GO:0048046(apoplast);GO:0052689(carboxylic ester hydrolase activity)	ko01200(Carbon metabolism)
lja-MIR11104-p5_1ss19GA	XM_016624701.1	XM_016624701.1	POSF21	transcription factor RF2b-like	1739-1762	2.5	GO:0003700(transcription factor activity, sequence-specific DNA binding);GO:0005634(nucleus)	ko04141(Protein processing in endoplasmic reticulum)
lja-MIR11104-p5_1ss19GA	XM_016624699.1	XM_016624699.1	POSF21	transcription factor RF2b-like	1726-1749	2.5	GO:0003700(transcription factor activity, sequence-specific DNA binding);GO:0005634(nucleus)	ko04141(Protein processing in endoplasmic reticulum)
lja-MIR11104-p5_1ss19GA	XM_016624700.1	XM_016624700.1	POSF21	transcription factor RF2b-like	1738-1761	2.5	GO:0003700(transcription factor activity, sequence-specific DNA binding);GO:0005634(nucleus)	ko04141(Protein processing in endoplasmic reticulum)
lja-MIR11104-p5_1ss19GA	XM_016587072.1	XM_016587072.1	RF2b	transcription factor RF2b-like	1750-1773	2.5	GO:0003700(transcription factor activity, sequence-specific DNA binding);GO:0005634(nucleus)	ko04141(Protein processing in endoplasmic reticulum)
stu-miR171c-3p	XM_016577663.1	XM_016577663.1	SCL15	DELLA protein GAI1-like	882-902	1.5	GO:0003700(transcription factor activity, sequence-specific DNA binding);GO:0005634(nucleus);GO:0006355(regulation of transcription, DNA-templated);GO:0030154(cell differentiation);GO:0043565(sequence-specific DNA binding);GO:0048831(regulation of shoot system development)	ko04075(Plant hormone signal transduction)
stu-miR171c-3p	XM_016625781.1	XM_016625781.1	SCL6	DELLA protein GAI-like	1710-1730	1	GO:0003700(transcription factor activity, sequence-specific DNA binding);GO:0005634(nucleus);GO:0006355(regulation of transcription, DNA-templated);GO:0010492(maintenance of shoot apical meristem identity);GO:0043565(sequence-specific DNA binding);GO:0048768(root hair cell tip growth);GO:0051301(cell division)	ko04075(Plant hormone signal transduction)
stu-miR171c-3p	XM_016625782.1	XM_016625782.1	SCL6	DELLA protein GAI-like	1700-1720	1	GO:0003700(transcription factor activity, sequence-specific DNA binding);GO:0005634(nucleus);GO:0006355(regulation of transcription, DNA-templated);GO:0010492(maintenance of shoot apical meristem identity);GO:0043565(sequence-specific DNA binding);GO:0048768(root hair cell tip growth);GO:0051301(cell division)	ko04075(Plant hormone signal transduction)
stu-miR171c-3p	XM_016588934.1	XM_016588934.1	SCL15	hypothetical protein	895-915	1.5	GO:0003700(transcription factor activity, sequence-specific DNA binding);GO:0005634(nucleus);GO:0006355(regulation of transcription, DNA-templated);GO:0030154(cell differentiation);GO:0043565(sequence-specific DNA binding);GO:0048831(regulation of shoot system development)	ko04075(Plant hormone signal transduction)
stu-miR171c-3p	XM_016582020.1	XM_016582020.1	SCL6	DELLA protein RGL2	1387-1407	1	GO:0003700(transcription factor activity, sequence-specific DNA binding);GO:0005634(nucleus);GO:0006355(regulation of transcription, DNA-templated);GO:0030154(cell differentiation);GO:0043565(sequence-specific DNA binding)	ko04075(Plant hormone signal transduction)
stu-miR171c-3p	XM_016582022.1	XM_016582022.1	SCL6	DELLA protein RGL2	1303-1323	1	GO:0003700(transcription factor activity, sequence-specific DNA binding);GO:0005634(nucleus);GO:0006355(regulation of transcription, DNA-templated);GO:0030154(cell differentiation);GO:0043565(sequence-specific DNA binding)	ko04075(Plant hormone signal transduction)
stu-miR171c-3p	XM_016582024.1	XM_016582024.1	SCL6	DELLA protein RGL2	1058-1078	1	GO:0003700(transcription factor activity, sequence-specific DNA binding);GO:0005634(nucleus);GO:0006355(regulation of transcription, DNA-templated);GO:0030154(cell differentiation);GO:0043565(sequence-specific DNA binding)	ko04075(Plant hormone signal transduction)
stu-miR171c-3p	XM_016582023.1	XM_016582023.1	SCL6	DELLA protein RGL2	1226-1246	1	GO:0003700(transcription factor activity, sequence-specific DNA binding);GO:0005634(nucleus);GO:0006355(regulation of transcription, DNA-templated);GO:0030154(cell differentiation);GO:0043565(sequence-specific DNA binding)	ko04075(Plant hormone signal transduction)
stu-miR171c-3p	XM_016605350.1	XM_016605350.1	At2g34460	hypothetical protein	314-334	2.5	GO:0005739(mitochondrion);GO:0009507(chloroplast);GO:0009534(chloroplast thylakoid);GO:0009535(chloroplast thylakoid membrane);GO:0009941(chloroplast envelope);GO:0010287(plastoglobule)	ko00480(Glutathione metabolism)
stu-miR171c-3p	XM_016582267.1	XM_016582267.1	ABCC10	ABC transporter C family member 10-like	4036-4056	2.5	GO:0005524(ATP binding);GO:0005774(vacuolar membrane);GO:0005886(plasma membrane);GO:0008559(xenobiotic-transporting ATPase activity);GO:0016021(integral component of membrane);GO:0042626(ATPase activity, coupled to transmembrane movement of substances)	ko02010(ABC transporters)
stu-miR171c-3p	XM_016582268.1	XM_016582268.1	ABCC10	ABC transporter C family member 10-like	4028-4048	2.5	GO:0005524(ATP binding);GO:0005774(vacuolar membrane);GO:0005886(plasma membrane);GO:0008559(xenobiotic-transporting ATPase activity);GO:0016021(integral component of membrane);GO:0042626(ATPase activity, coupled to transmembrane movement of substances)	ko02010(ABC transporters)
stu-miR171c-3p	XM_016631827.1	XM_016631827.1	SCL6	DELLA protein RGL2	1376-1396	1	GO:0003700(transcription factor activity, sequence-specific DNA binding);GO:0005634(nucleus);GO:0006355(regulation of transcription, DNA-templated);GO:0030154(cell differentiation);GO:0043565(sequence-specific DNA binding)	ko04075(Plant hormone signal transduction)
stu-miR171c-3p	XM_016631828.1	XM_016631828.1	SCL6	DELLA protein RGL2	1226-1246	1	GO:0003700(transcription factor activity, sequence-specific DNA binding);GO:0005634(nucleus);GO:0006355(regulation of transcription, DNA-templated);GO:0030154(cell differentiation);GO:0043565(sequence-specific DNA binding)	ko04075(Plant hormone signal transduction)
stu-miR171c-3p	XM_016635528.1	XM_016635528.1	SCL6	hypothetical protein	1686-1706	1	GO:0003700(transcription factor activity, sequence-specific DNA binding);GO:0005634(nucleus);GO:0006355(regulation of transcription, DNA-templated);GO:0010492(maintenance of shoot apical meristem identity);GO:0043565(sequence-specific DNA binding);GO:0048768(root hair cell tip growth);GO:0051301(cell division)	ko04075(Plant hormone signal transduction)
stu-miR171c-3p	XM_016643752.1	XM_016643752.1	PROT1	-	1758-1777	2.5	GO:0003333(amino acid transmembrane transport);GO:0005886(plasma membrane);GO:0015171(amino acid transmembrane transporter activity)
stu-miR171c-3p	XM_016644604.1	XM_016644604.1	At2g34460	hypothetical protein	317-337	2.5	GO:0005739(mitochondrion);GO:0009507(chloroplast);GO:0009534(chloroplast thylakoid);GO:0009535(chloroplast thylakoid membrane);GO:0009941(chloroplast envelope);GO:0010287(plastoglobule)	ko00480(Glutathione metabolism)
stu-miR171c-3p	XM_016660107.1	XM_016660107.1	TMEM258	-	142-162	2.5	GO:0003674(molecular_function);GO:0008150(biological_process);GO:0009507(chloroplast);GO:0016021(integral component of membrane)
nta-MIR477a-p3	XM_016587395.1	XM_016587395.1	Wdr3	WD repeat-containing protein 3-like	293-313	2.5	GO:0000462(maturation of SSU-rRNA from tricistronic rRNA transcript );GO:0030515(snoRNA binding);GO:0032040(small-subunit processome);GO:0034388(Pwp2p-containing subcomplex of 90S preribosome)	ko03008(Ribosome biogenesis in eukaryotes)
nta-MIR477a-p3	XM_016640623.1	XM_016640623.1	-	-	734-754	2.5	-
nta-miR399a	XM_016600215.1	XM_016600215.1	PHT1-4	-	317-337	2.2	GO:0005887(integral component of plasma membrane);GO:0022891(substrate-specific transmembrane transporter activity)
nta-miR399a	XM_016580449.1	XM_016580449.1	-	-	250-270	2.5	-
nta-miR399a	XM_016584636.1	XM_016584636.1	-	-	1806-1826	2.5	-
nta-miR399a	XM_016643714.1	XM_016643714.1	PHT1-4	-	161-181	2.2	GO:0005887(integral component of plasma membrane);GO:0022891(substrate-specific transmembrane transporter activity)
ssl-MIR171a-p3	XM_016592041.1	XM_016592041.1	At1g11300	G-type lectin S-receptor-like serine/threonine-protein kinase CES101	50-70	2.5	GO:0004674(protein serine/threonine kinase activity);GO:0005886(plasma membrane);GO:0006468(protein phosphorylation);GO:0009506(plasmodesma);GO:0031625(ubiquitin protein ligase binding);GO:0045087(innate immune response)	ko00520(Amino sugar and nucleotide sugar metabolism)
ssl-MIR171a-p3	XM_016587508.1	XM_016587508.1	VPS35B	vacuolar protein sorting-associated protein 35A	1274-1293	2.2	GO:0005770(late endosome);GO:0006886(intracellular protein transport);GO:0008565(protein transporter activity);GO:0030904(retromer complex);GO:0042147(retrograde transport, endosome to Golgi)	ko04144(Endocytosis)
ssl-MIR171a-p3	XM_016587498.1	XM_016587498.1	VPS35B	vacuolar protein sorting-associated protein 35A	1611-1630	2.2	GO:0005770(late endosome);GO:0006886(intracellular protein transport);GO:0008565(protein transporter activity);GO:0030904(retromer complex);GO:0042147(retrograde transport, endosome to Golgi)	ko04144(Endocytosis)
ssl-MIR171a-p3	XM_016611383.1	XM_016611383.1	VPS35B	vacuolar protein sorting-associated protein 35A-like	1325-1344	2.2	GO:0005770(late endosome);GO:0006886(intracellular protein transport);GO:0008565(protein transporter activity);GO:0030904(retromer complex);GO:0042147(retrograde transport, endosome to Golgi)	ko04144(Endocytosis)
ssl-MIR171a-p3	XM_016617482.1	XM_016617482.1	VPS35A	vacuolar protein sorting-associated protein 35A	1544-1563	2.2	GO:0005770(late endosome);GO:0006886(intracellular protein transport);GO:0008565(protein transporter activity);GO:0030904(retromer complex);GO:0042147(retrograde transport, endosome to Golgi)	ko04144(Endocytosis)
ssl-MIR171a-p3	XM_016630251.1	XM_016630251.1	-	-	1720-1739	2.5	GO:0003677(DNA binding);GO:0005634(nucleus);GO:0005886(plasma membrane);GO:0008150(biological_process)
ssl-MIR171a-p3	XM_016604620.1	XM_016604620.1	-	-	869-889	2.5	-
ssl-MIR171a-p3	XM_016590426.1	XM_016590426.1	VPS35B	vacuolar protein sorting-associated protein 35A-like	1555-1574	2.2	GO:0005770(late endosome);GO:0006886(intracellular protein transport);GO:0008565(protein transporter activity);GO:0030904(retromer complex);GO:0042147(retrograde transport, endosome to Golgi)	ko04144(Endocytosis)
stu-MIR319b-p5	XM_016649553.1	XM_016649553.1	FH4	hypothetical protein	1629-1649	2.5	GO:0003779(actin binding);GO:0005522(profilin binding);GO:0005886(plasma membrane);GO:0005911(cell-cell junction);GO:0009932(cell tip growth);GO:0016021(integral component of membrane);GO:0045010(actin nucleation);GO:0051015(actin filament binding)	ko04626(Plant-pathogen interaction)
stu-MIR319b-p5	XM_016648987.1	XM_016648987.1	FH4	hypothetical protein	1636-1656	2.5	GO:0003779(actin binding);GO:0005522(profilin binding);GO:0005886(plasma membrane);GO:0005911(cell-cell junction);GO:0009932(cell tip growth);GO:0016021(integral component of membrane);GO:0045010(actin nucleation);GO:0051015(actin filament binding)	ko04626(Plant-pathogen interaction)
stu-MIR319b-p5	XM_016585048.1	XM_016585048.1	NHX7	-	279-298	2.5	GO:0000302(response to reactive oxygen species);GO:0005515(protein binding);GO:0005886(plasma membrane);GO:0006814(sodium ion transport);GO:0006979(response to oxidative stress);GO:0009651(response to salt stress);GO:0009941(chloroplast envelope);GO:0010163(high-affinity potassium ion import);GO:0015299(solute:proton antiporter activity);GO:0015385(sodium:proton antiporter activity);GO:0016021(in…
stu-MIR319b-p5	XM_016585047.1	XM_016585047.1	NHX7	-	279-298	2.5	GO:0000302(response to reactive oxygen species);GO:0005515(protein binding);GO:0005886(plasma membrane);GO:0006814(sodium ion transport);GO:0006979(response to oxidative stress);GO:0009651(response to salt stress);GO:0009941(chloroplast envelope);GO:0010163(high-affinity potassium ion import);GO:0015299(solute:proton antiporter activity);GO:0015385(sodium:proton antiporter activity);GO:0016021(in…
stu-MIR319b-p5	XM_016601180.1	XM_016601180.1	-	-	1385-1406	2	-
stu-MIR319b-p5	XM_016632400.1	XM_016632400.1	NHX7	-	1219-1238	2.5	GO:0000302(response to reactive oxygen species);GO:0005515(protein binding);GO:0005886(plasma membrane);GO:0006814(sodium ion transport);GO:0006979(response to oxidative stress);GO:0009651(response to salt stress);GO:0009941(chloroplast envelope);GO:0010163(high-affinity potassium ion import);GO:0015299(solute:proton antiporter activity);GO:0015385(sodium:proton antiporter activity);GO:0016021(in…
stu-MIR319b-p5	XM_016658094.1	XM_016658094.1	CAP10A	Chlorophyll a-b binding protein CP24 10A, chloroplastic	880-900	2.5	GO:0009416(response to light stimulus);GO:0009535(chloroplast thylakoid membrane);GO:0009768(photosynthesis, light harvesting in photosystem I);GO:0009941(chloroplast envelope);GO:0010287(plastoglobule);GO:0016168(chlorophyll binding);GO:0031409(pigment binding)	ko00196(Photosynthesis - antenna proteins)
stu-miR167a-3p_L+4_1ss18CT	XM_016581207.1	XM_016581207.1	LBD21	uncharacterized LOC102704525	297-320	2	GO:0005634(nucleus);GO:0008150(biological_process)	ko00511(Other glycan degradation)
stu-miR167a-3p_L+4_1ss18CT	XM_016655873.1	XM_016655873.1	LBD21	uncharacterized LOC102704525	317-340	2	GO:0005634(nucleus);GO:0008150(biological_process)	ko00511(Other glycan degradation)
sly-miR390a-5p_R+1_1ss19AG	XM_016592247.1	XM_016592247.1	GRF5	-	186-206	2.5	GO:0005524(ATP binding);GO:0005634(nucleus);GO:0006351(transcription, DNA-templated);GO:0006355(regulation of transcription, DNA-templated);GO:0048366(leaf development)
sly-miR390a-5p_R+1_1ss19AG	XM_016624623.1	XM_016624623.1	RPK2	BRASSINOSTEROID INSENSITIVE 1-associated receptor kinase 1	1040-1061	1.8	GO:0004702(receptor signaling protein serine/threonine kinase activity);GO:0005524(ATP binding);GO:0005777(peroxisome);GO:0005886(plasma membrane);GO:0009409(response to cold);GO:0009414(response to water deprivation);GO:0009651(response to salt stress);GO:0009737(response to abscisic acid);GO:0009738(abscisic acid-activated signaling pathway);GO:0009942(longitudinal axis specification);GO:000994…	ko04075(Plant hormone signal transduction);ko04626(Plant-pathogen interaction)
sly-miR390a-5p_R+1_1ss19AG	XM_016594166.1	XM_016594166.1	PXC3	brassinosteroid receptor	1959-1980	2.5	GO:0004674(protein serine/threonine kinase activity);GO:0004714(transmembrane receptor protein tyrosine kinase activity);GO:0005524(ATP binding);GO:0005886(plasma membrane);GO:0006468(protein phosphorylation);GO:0007169(transmembrane receptor protein tyrosine kinase signaling pathway);GO:0016021(integral component of membrane);GO:0016301(kinase activity)	ko04075(Plant hormone signal transduction)
sly-miR390a-5p_R+1_1ss19AG	XM_016610048.1	XM_016610048.1	PXC3	systemin receptor SR160	878-900	2.5	GO:0004674(protein serine/threonine kinase activity);GO:0004714(transmembrane receptor protein tyrosine kinase activity);GO:0005524(ATP binding);GO:0005886(plasma membrane);GO:0006468(protein phosphorylation);GO:0007169(transmembrane receptor protein tyrosine kinase signaling pathway);GO:0016021(integral component of membrane);GO:0016301(kinase activity)	ko04075(Plant hormone signal transduction)
sly-miR390a-5p_R+1_1ss19AG	XM_016639092.1	XM_016639092.1	RPK2	BRASSINOSTEROID INSENSITIVE 1-associated receptor kinase 1	1008-1029	1.8	GO:0004702(receptor signaling protein serine/threonine kinase activity);GO:0005524(ATP binding);GO:0005777(peroxisome);GO:0005886(plasma membrane);GO:0009409(response to cold);GO:0009414(response to water deprivation);GO:0009651(response to salt stress);GO:0009737(response to abscisic acid);GO:0009738(abscisic acid-activated signaling pathway);GO:0009942(longitudinal axis specification);GO:000994…	ko04075(Plant hormone signal transduction);ko04626(Plant-pathogen interaction)
sly-miR390a-5p_R+1_1ss19AG	XM_016619391.1	XM_016619391.1	GRF5	-	262-282	2.5	GO:0005524(ATP binding);GO:0005634(nucleus);GO:0006351(transcription, DNA-templated);GO:0006355(regulation of transcription, DNA-templated);GO:0048366(leaf development)
sly-miR390a-5p_R+1_1ss19AG	XM_016659405.1	XM_016659405.1	PXC3	brassinosteroid LRR receptor kinase-like	1577-1598	2.2	GO:0004674(protein serine/threonine kinase activity);GO:0004714(transmembrane receptor protein tyrosine kinase activity);GO:0005524(ATP binding);GO:0005886(plasma membrane);GO:0006468(protein phosphorylation);GO:0007169(transmembrane receptor protein tyrosine kinase signaling pathway);GO:0016021(integral component of membrane);GO:0016301(kinase activity)	ko04075(Plant hormone signal transduction)
osa-miR390-5p_R+1	XM_016592247.1	XM_016592247.1	GRF5	-	186-206	2.5	GO:0005524(ATP binding);GO:0005634(nucleus);GO:0006351(transcription, DNA-templated);GO:0006355(regulation of transcription, DNA-templated);GO:0048366(leaf development)
osa-miR390-5p_R+1	XM_016624623.1	XM_016624623.1	RPK2	BRASSINOSTEROID INSENSITIVE 1-associated receptor kinase 1	1040-1061	1.8	GO:0004702(receptor signaling protein serine/threonine kinase activity);GO:0005524(ATP binding);GO:0005777(peroxisome);GO:0005886(plasma membrane);GO:0009409(response to cold);GO:0009414(response to water deprivation);GO:0009651(response to salt stress);GO:0009737(response to abscisic acid);GO:0009738(abscisic acid-activated signaling pathway);GO:0009942(longitudinal axis specification);GO:000994…	ko04075(Plant hormone signal transduction);ko04626(Plant-pathogen interaction)
osa-miR390-5p_R+1	XM_016594166.1	XM_016594166.1	PXC3	brassinosteroid receptor	1959-1980	2.5	GO:0004674(protein serine/threonine kinase activity);GO:0004714(transmembrane receptor protein tyrosine kinase activity);GO:0005524(ATP binding);GO:0005886(plasma membrane);GO:0006468(protein phosphorylation);GO:0007169(transmembrane receptor protein tyrosine kinase signaling pathway);GO:0016021(integral component of membrane);GO:0016301(kinase activity)	ko04075(Plant hormone signal transduction)
osa-miR390-5p_R+1	XM_016610048.1	XM_016610048.1	PXC3	systemin receptor SR160	878-900	2.5	GO:0004674(protein serine/threonine kinase activity);GO:0004714(transmembrane receptor protein tyrosine kinase activity);GO:0005524(ATP binding);GO:0005886(plasma membrane);GO:0006468(protein phosphorylation);GO:0007169(transmembrane receptor protein tyrosine kinase signaling pathway);GO:0016021(integral component of membrane);GO:0016301(kinase activity)	ko04075(Plant hormone signal transduction)
osa-miR390-5p_R+1	XM_016639092.1	XM_016639092.1	RPK2	BRASSINOSTEROID INSENSITIVE 1-associated receptor kinase 1	1008-1029	1.8	GO:0004702(receptor signaling protein serine/threonine kinase activity);GO:0005524(ATP binding);GO:0005777(peroxisome);GO:0005886(plasma membrane);GO:0009409(response to cold);GO:0009414(response to water deprivation);GO:0009651(response to salt stress);GO:0009737(response to abscisic acid);GO:0009738(abscisic acid-activated signaling pathway);GO:0009942(longitudinal axis specification);GO:000994…	ko04075(Plant hormone signal transduction);ko04626(Plant-pathogen interaction)
osa-miR390-5p_R+1	XM_016619391.1	XM_016619391.1	GRF5	-	262-282	2.5	GO:0005524(ATP binding);GO:0005634(nucleus);GO:0006351(transcription, DNA-templated);GO:0006355(regulation of transcription, DNA-templated);GO:0048366(leaf development)
osa-miR390-5p_R+1	XM_016659405.1	XM_016659405.1	PXC3	brassinosteroid LRR receptor kinase-like	1577-1598	2.2	GO:0004674(protein serine/threonine kinase activity);GO:0004714(transmembrane receptor protein tyrosine kinase activity);GO:0005524(ATP binding);GO:0005886(plasma membrane);GO:0006468(protein phosphorylation);GO:0007169(transmembrane receptor protein tyrosine kinase signaling pathway);GO:0016021(integral component of membrane);GO:0016301(kinase activity)	ko04075(Plant hormone signal transduction)
rgl-miR7972_2ss14TG21CT	XM_016613454.1	XM_016613454.1	At1g43900	-	876-895	2.2	GO:0004722(protein serine/threonine phosphatase activity);GO:0005739(mitochondrion);GO:0006470(protein dephosphorylation);GO:0016021(integral component of membrane);GO:0046872(metal ion binding)
rgl-miR7972_2ss14TG21CT	XM_016613382.1	XM_016613382.1	At1g43900	-	881-900	2.2	GO:0004722(protein serine/threonine phosphatase activity);GO:0005739(mitochondrion);GO:0006470(protein dephosphorylation);GO:0016021(integral component of membrane);GO:0046872(metal ion binding)
rgl-miR7972_2ss14TG21CT	XM_016645396.1	XM_016645396.1	EMB2744	pentatricopeptide repeat-containing protein At2g04860	2576-2595	2.5	GO:0005739(mitochondrion);GO:0008270(zinc ion binding);GO:0009793(embryo development ending in seed dormancy)	ko00500(Starch and sucrose metabolism)
rgl-miR7972_2ss14TG21CT	XM_016645394.1	XM_016645394.1	EMB2744	pentatricopeptide repeat-containing protein At2g04860	2576-2595	2.5	GO:0005739(mitochondrion);GO:0008270(zinc ion binding);GO:0009793(embryo development ending in seed dormancy)	ko00500(Starch and sucrose metabolism)
rgl-miR7972_2ss14TG21CT	XM_016645392.1	XM_016645392.1	EMB2744	pentatricopeptide repeat-containing protein At2g04860	2280-2299	2.5	GO:0005739(mitochondrion);GO:0008270(zinc ion binding);GO:0009793(embryo development ending in seed dormancy)	ko00500(Starch and sucrose metabolism)
rgl-miR7972_2ss14TG21CT	XM_016645393.1	XM_016645393.1	EMB2744	pentatricopeptide repeat-containing protein At2g04860	2576-2595	2.5	GO:0005739(mitochondrion);GO:0008270(zinc ion binding);GO:0009793(embryo development ending in seed dormancy)	ko00500(Starch and sucrose metabolism)
rgl-miR7972_2ss14TG21CT	XM_016645390.1	XM_016645390.1	EMB2744	pentatricopeptide repeat-containing protein At2g04860	2576-2595	2.5	GO:0005739(mitochondrion);GO:0008270(zinc ion binding);GO:0009793(embryo development ending in seed dormancy)	ko00500(Starch and sucrose metabolism)
rgl-miR7972_2ss14TG21CT	XM_016645391.1	XM_016645391.1	EMB2744	pentatricopeptide repeat-containing protein At2g04860	2576-2595	2.5	GO:0005739(mitochondrion);GO:0008270(zinc ion binding);GO:0009793(embryo development ending in seed dormancy)	ko00500(Starch and sucrose metabolism)
rgl-miR7972_2ss14TG21CT	XM_016648952.1	XM_016648952.1	CAT1	-	561-581	2.2	GO:0005887(integral component of plasma membrane);GO:0015179(L-amino acid transmembrane transporter activity);GO:0015297(antiporter activity)
rgl-miR7972_2ss14TG21CT	XM_016596438.1	XM_016596438.1	At5g01110	-	1762-1781	2.5	GO:0005739(mitochondrion)
rgl-miR7972_2ss14TG21CT	XM_016596440.1	XM_016596440.1	At5g01110	-	1762-1781	2.5	GO:0005739(mitochondrion)
rgl-miR7972_2ss14TG21CT	XM_016580882.1	XM_016580882.1	At1g43900	-	684-703	2.2	GO:0004722(protein serine/threonine phosphatase activity);GO:0005739(mitochondrion);GO:0006470(protein dephosphorylation);GO:0016021(integral component of membrane);GO:0046872(metal ion binding)
rgl-miR7972_2ss14TG21CT	XM_016580883.1	XM_016580883.1	At1g43900	-	686-705	2.2	GO:0004722(protein serine/threonine phosphatase activity);GO:0005739(mitochondrion);GO:0006470(protein dephosphorylation);GO:0016021(integral component of membrane);GO:0046872(metal ion binding)
rgl-miR7972_2ss14TG21CT	XM_016597404.1	XM_016597404.1	PCMP-E16	pentatricopeptide repeat-containing protein At2g04860	526-546	2	GO:0003674(molecular_function);GO:0005739(mitochondrion);GO:0008150(biological_process)	ko00500(Starch and sucrose metabolism)
rgl-miR7972_2ss14TG21CT	XM_016583027.1				384-404	2.5	-
rgl-miR7972_2ss14TG21CT	XM_016614270.1	XM_016614270.1	ROS1	-	926-946	0.8	GO:0003677(DNA binding);GO:0003906(DNA-);GO:0005515(protein binding);GO:0005634(nucleus);GO:0005730(nucleolus);GO:0006281(DNA repair);GO:0006284(base-excision repair);GO:0006306(DNA methylation);GO:0006342(chromatin silencing);GO:0006351(transcription, DNA-templated);GO:0019104(DNA N-glycosylase activity);GO:0031936(negative regulation of chromatin silencing);GO:0046872(metal ion binding);GO:0051…
rgl-miR7972_2ss14TG21CT	XM_016614271.1	XM_016614271.1	ROS1	-	926-946	0.8	GO:0003677(DNA binding);GO:0003906(DNA-);GO:0005515(protein binding);GO:0005634(nucleus);GO:0005730(nucleolus);GO:0006281(DNA repair);GO:0006284(base-excision repair);GO:0006306(DNA methylation);GO:0006342(chromatin silencing);GO:0006351(transcription, DNA-templated);GO:0019104(DNA N-glycosylase activity);GO:0031936(negative regulation of chromatin silencing);GO:0046872(metal ion binding);GO:0051…
rgl-miR7972_2ss14TG21CT	XM_016630351.1	XM_016630351.1	pol	uncharacterized LOC103427975	451-470	2.5	-	ko03040(Spliceosome)
rgl-miR7972_2ss14TG21CT	XM_016600234.1	XM_016600234.1	-	-	1489-1510	2.5	GO:0015194(L-serine transmembrane transporter activity);GO:0016021(integral component of membrane)
rgl-miR7972_2ss14TG21CT	XM_016638632.1	XM_016638632.1	ROS1	-	1195-1215	1	GO:0003677(DNA binding);GO:0003906(DNA-);GO:0005515(protein binding);GO:0005634(nucleus);GO:0005730(nucleolus);GO:0006281(DNA repair);GO:0006284(base-excision repair);GO:0006306(DNA methylation);GO:0006342(chromatin silencing);GO:0006351(transcription, DNA-templated);GO:0019104(DNA N-glycosylase activity);GO:0031936(negative regulation of chromatin silencing);GO:0046872(metal ion binding);GO:0051…
rgl-miR7972_2ss14TG21CT	XM_016638634.1	XM_016638634.1	ROS1	-	1045-1065	1	GO:0003677(DNA binding);GO:0003906(DNA-);GO:0005515(protein binding);GO:0005634(nucleus);GO:0005730(nucleolus);GO:0006281(DNA repair);GO:0006284(base-excision repair);GO:0006306(DNA methylation);GO:0006342(chromatin silencing);GO:0006351(transcription, DNA-templated);GO:0019104(DNA N-glycosylase activity);GO:0031936(negative regulation of chromatin silencing);GO:0046872(metal ion binding);GO:0051…
rgl-miR7972_2ss14TG21CT	XM_016638631.1	XM_016638631.1	ROS1	-	1182-1202	1	GO:0003677(DNA binding);GO:0003906(DNA-);GO:0005515(protein binding);GO:0005634(nucleus);GO:0005730(nucleolus);GO:0006281(DNA repair);GO:0006284(base-excision repair);GO:0006306(DNA methylation);GO:0006342(chromatin silencing);GO:0006351(transcription, DNA-templated);GO:0019104(DNA N-glycosylase activity);GO:0031936(negative regulation of chromatin silencing);GO:0046872(metal ion binding);GO:0051…
rgl-miR7972_2ss14TG21CT	XM_016638633.1	XM_016638633.1	ROS1	-	1032-1052	1	GO:0003677(DNA binding);GO:0003906(DNA-);GO:0005515(protein binding);GO:0005634(nucleus);GO:0005730(nucleolus);GO:0006281(DNA repair);GO:0006284(base-excision repair);GO:0006306(DNA methylation);GO:0006342(chromatin silencing);GO:0006351(transcription, DNA-templated);GO:0019104(DNA N-glycosylase activity);GO:0031936(negative regulation of chromatin silencing);GO:0046872(metal ion binding);GO:0051…
rgl-miR7972_2ss14TG21CT	XM_016633188.1	XM_016633188.1	ROS1	-	1113-1133	1.2	GO:0003677(DNA binding);GO:0003906(DNA-);GO:0005515(protein binding);GO:0005634(nucleus);GO:0005730(nucleolus);GO:0006281(DNA repair);GO:0006284(base-excision repair);GO:0006306(DNA methylation);GO:0006342(chromatin silencing);GO:0006351(transcription, DNA-templated);GO:0019104(DNA N-glycosylase activity);GO:0031936(negative regulation of chromatin silencing);GO:0046872(metal ion binding);GO:0051…
rgl-miR7972_2ss14TG21CT	XM_016603774.1	XM_016603774.1	-	-	1145-1165	1.2	-
rgl-miR7972_2ss14TG21CT	XM_016590610.1	XM_016590610.1	PCMP-E16	pentatricopeptide repeat-containing protein At2g04860	372-392	2.2	GO:0003674(molecular_function);GO:0005739(mitochondrion);GO:0008150(biological_process)	ko00500(Starch and sucrose metabolism)
osa-miR160a-5p_R+2_1ss21AT	XM_016592446.1	XM_016592446.1	ARF18	ADP-ribosylation factor 1	127-149	0.8	GO:0003677(DNA binding);GO:0003700(transcription factor activity, sequence-specific DNA binding);GO:0005634(nucleus);GO:0006351(transcription, DNA-templated);GO:0006355(regulation of transcription, DNA-templated);GO:0007389(pattern specification process);GO:0009733(response to auxin);GO:0009734(auxin-activated signaling pathway);GO:0035198(miRNA binding);GO:0048829(root cap development);GO:005130…	ko04075(Plant hormone signal transduction)
osa-miR160a-5p_R+2_1ss21AT	XM_016578085.1	XM_016578085.1	ARF22	auxin response factor 7-like	1607-1629	1.8	GO:0003677(DNA binding);GO:0003700(transcription factor activity, sequence-specific DNA binding);GO:0005634(nucleus);GO:0006351(transcription, DNA-templated);GO:0006355(regulation of transcription, DNA-templated);GO:0007389(pattern specification process);GO:0009734(auxin-activated signaling pathway);GO:0009738(abscisic acid-activated signaling pathway);GO:0009743(response to carbohydrate);GO:0010…	ko04075(Plant hormone signal transduction)
osa-miR160a-5p_R+2_1ss21AT	XM_016578082.1	XM_016578082.1	ARF22	auxin response factor 7-like	1495-1517	1.8	GO:0003677(DNA binding);GO:0003700(transcription factor activity, sequence-specific DNA binding);GO:0005634(nucleus);GO:0006351(transcription, DNA-templated);GO:0006355(regulation of transcription, DNA-templated);GO:0007389(pattern specification process);GO:0009734(auxin-activated signaling pathway);GO:0009738(abscisic acid-activated signaling pathway);GO:0009743(response to carbohydrate);GO:0010…	ko04075(Plant hormone signal transduction)
osa-miR160a-5p_R+2_1ss21AT	XM_016578084.1	XM_016578084.1	ARF22	auxin response factor 7-like	1455-1477	1.8	GO:0003677(DNA binding);GO:0003700(transcription factor activity, sequence-specific DNA binding);GO:0005634(nucleus);GO:0006351(transcription, DNA-templated);GO:0006355(regulation of transcription, DNA-templated);GO:0007389(pattern specification process);GO:0009734(auxin-activated signaling pathway);GO:0009738(abscisic acid-activated signaling pathway);GO:0009743(response to carbohydrate);GO:0010…	ko04075(Plant hormone signal transduction)
osa-miR160a-5p_R+2_1ss21AT	XM_016578083.1	XM_016578083.1	ARF22	auxin response factor 7-like	1537-1559	1.8	GO:0003677(DNA binding);GO:0003700(transcription factor activity, sequence-specific DNA binding);GO:0005634(nucleus);GO:0006351(transcription, DNA-templated);GO:0006355(regulation of transcription, DNA-templated);GO:0007389(pattern specification process);GO:0009734(auxin-activated signaling pathway);GO:0009738(abscisic acid-activated signaling pathway);GO:0009743(response to carbohydrate);GO:0010…	ko04075(Plant hormone signal transduction)
osa-miR160a-5p_R+2_1ss21AT	XM_016578081.1	XM_016578081.1	ARF22	auxin response factor 7-like	1542-1564	1.8	GO:0003677(DNA binding);GO:0003700(transcription factor activity, sequence-specific DNA binding);GO:0005634(nucleus);GO:0006351(transcription, DNA-templated);GO:0006355(regulation of transcription, DNA-templated);GO:0007389(pattern specification process);GO:0009734(auxin-activated signaling pathway);GO:0009738(abscisic acid-activated signaling pathway);GO:0009743(response to carbohydrate);GO:0010…	ko04075(Plant hormone signal transduction)
osa-miR160a-5p_R+2_1ss21AT	XM_016578086.1	XM_016578086.1	ARF22	auxin response factor 7-like	1545-1567	1.8	GO:0003677(DNA binding);GO:0003700(transcription factor activity, sequence-specific DNA binding);GO:0005634(nucleus);GO:0006351(transcription, DNA-templated);GO:0006355(regulation of transcription, DNA-templated);GO:0007389(pattern specification process);GO:0009734(auxin-activated signaling pathway);GO:0009738(abscisic acid-activated signaling pathway);GO:0009743(response to carbohydrate);GO:0010…	ko04075(Plant hormone signal transduction)
osa-miR160a-5p_R+2_1ss21AT	XM_016584484.1	XM_016584484.1	ARF17	auxin response factor 3	1442-1464	1.5	GO:0000987(core promoter proximal region sequence-specific DNA binding);GO:0003700(transcription factor activity, sequence-specific DNA binding);GO:0005634(nucleus);GO:0006351(transcription, DNA-templated);GO:0006355(regulation of transcription, DNA-templated);GO:0009555(pollen development);GO:0009653(anatomical structure morphogenesis);GO:0009734(auxin-activated signaling pathway);GO:0010208(pol…	ko04075(Plant hormone signal transduction)
osa-miR160a-5p_R+2_1ss21AT	XM_016585764.1	XM_016585764.1	ARF17	auxin response factor 3	1448-1470	1.5	GO:0000987(core promoter proximal region sequence-specific DNA binding);GO:0003700(transcription factor activity, sequence-specific DNA binding);GO:0005634(nucleus);GO:0006351(transcription, DNA-templated);GO:0006355(regulation of transcription, DNA-templated);GO:0009555(pollen development);GO:0009653(anatomical structure morphogenesis);GO:0009734(auxin-activated signaling pathway);GO:0010208(pol…	ko04075(Plant hormone signal transduction)
osa-miR160a-5p_R+2_1ss21AT	XM_016616661.1	XM_016616661.1	ARF22	auxin response factor 7-like	1482-1504	1.8	GO:0003677(DNA binding);GO:0003700(transcription factor activity, sequence-specific DNA binding);GO:0005634(nucleus);GO:0006351(transcription, DNA-templated);GO:0006355(regulation of transcription, DNA-templated);GO:0007389(pattern specification process);GO:0009734(auxin-activated signaling pathway);GO:0009738(abscisic acid-activated signaling pathway);GO:0009743(response to carbohydrate);GO:0010…	ko04075(Plant hormone signal transduction)
osa-miR160a-5p_R+2_1ss21AT	XM_016616660.1	XM_016616660.1	ARF22	auxin response factor 7-like	1596-1618	1.8	GO:0003677(DNA binding);GO:0003700(transcription factor activity, sequence-specific DNA binding);GO:0005634(nucleus);GO:0006351(transcription, DNA-templated);GO:0006355(regulation of transcription, DNA-templated);GO:0007389(pattern specification process);GO:0009734(auxin-activated signaling pathway);GO:0009738(abscisic acid-activated signaling pathway);GO:0009743(response to carbohydrate);GO:0010…	ko04075(Plant hormone signal transduction)
osa-miR160a-5p_R+2_1ss21AT	XM_016616659.1	XM_016616659.1	ARF22	auxin response factor 7-like	1705-1727	1.8	GO:0003677(DNA binding);GO:0003700(transcription factor activity, sequence-specific DNA binding);GO:0005634(nucleus);GO:0006351(transcription, DNA-templated);GO:0006355(regulation of transcription, DNA-templated);GO:0007389(pattern specification process);GO:0009734(auxin-activated signaling pathway);GO:0009738(abscisic acid-activated signaling pathway);GO:0009743(response to carbohydrate);GO:0010…	ko04075(Plant hormone signal transduction)
osa-miR160a-5p_R+2_1ss21AT	XM_016616658.1	XM_016616658.1	ARF22	auxin response factor 7-like	1749-1771	1.8	GO:0003677(DNA binding);GO:0003700(transcription factor activity, sequence-specific DNA binding);GO:0005634(nucleus);GO:0006351(transcription, DNA-templated);GO:0006355(regulation of transcription, DNA-templated);GO:0007389(pattern specification process);GO:0009734(auxin-activated signaling pathway);GO:0009738(abscisic acid-activated signaling pathway);GO:0009743(response to carbohydrate);GO:0010…	ko04075(Plant hormone signal transduction)
osa-miR160a-5p_R+2_1ss21AT	XM_016616657.1	XM_016616657.1	ARF22	auxin response factor 7-like	1835-1857	1.8	GO:0003677(DNA binding);GO:0003700(transcription factor activity, sequence-specific DNA binding);GO:0005634(nucleus);GO:0006351(transcription, DNA-templated);GO:0006355(regulation of transcription, DNA-templated);GO:0007389(pattern specification process);GO:0009734(auxin-activated signaling pathway);GO:0009738(abscisic acid-activated signaling pathway);GO:0009743(response to carbohydrate);GO:0010…	ko04075(Plant hormone signal transduction)
osa-miR160a-5p_R+2_1ss21AT	XM_016602462.1	XM_016602462.1	ARF22	ADP-ribosylation factor 1	1573-1595	0.8	GO:0003677(DNA binding);GO:0003700(transcription factor activity, sequence-specific DNA binding);GO:0005634(nucleus);GO:0006351(transcription, DNA-templated);GO:0006355(regulation of transcription, DNA-templated);GO:0007389(pattern specification process);GO:0009733(response to auxin);GO:0009734(auxin-activated signaling pathway);GO:0035198(miRNA binding);GO:0048829(root cap development);GO:005130…	ko04075(Plant hormone signal transduction)
osa-miR160a-5p_R+2_1ss21AT	XM_016655248.1	XM_016655248.1	ARF18	auxin response factor 7-like	1916-1938	0.8	GO:0003677(DNA binding);GO:0003700(transcription factor activity, sequence-specific DNA binding);GO:0005634(nucleus);GO:0006351(transcription, DNA-templated);GO:0006355(regulation of transcription, DNA-templated);GO:0007389(pattern specification process);GO:0009734(auxin-activated signaling pathway);GO:0009738(abscisic acid-activated signaling pathway);GO:0009743(response to carbohydrate);GO:0010…	ko04075(Plant hormone signal transduction)
osa-miR160a-5p_R+2_1ss21AT	XM_016655249.1	XM_016655249.1	ARF18	auxin response factor 7-like	1495-1517	0.8	GO:0003677(DNA binding);GO:0003700(transcription factor activity, sequence-specific DNA binding);GO:0005634(nucleus);GO:0006351(transcription, DNA-templated);GO:0006355(regulation of transcription, DNA-templated);GO:0007389(pattern specification process);GO:0009734(auxin-activated signaling pathway);GO:0009738(abscisic acid-activated signaling pathway);GO:0009743(response to carbohydrate);GO:0010…	ko04075(Plant hormone signal transduction)
osa-miR160a-5p_R+2_1ss21AT	XM_016655250.1	XM_016655250.1	ARF18	auxin response factor 7-like	1474-1496	0.8	GO:0003677(DNA binding);GO:0003700(transcription factor activity, sequence-specific DNA binding);GO:0005634(nucleus);GO:0006351(transcription, DNA-templated);GO:0006355(regulation of transcription, DNA-templated);GO:0007389(pattern specification process);GO:0009734(auxin-activated signaling pathway);GO:0009738(abscisic acid-activated signaling pathway);GO:0009743(response to carbohydrate);GO:0010…	ko04075(Plant hormone signal transduction)
osa-miR160a-5p_R+2_1ss21AT	XM_016586695.1	XM_016586695.1	ARF18	auxin response factor 18-like	1-23	1.8	GO:0003677(DNA binding);GO:0003700(transcription factor activity, sequence-specific DNA binding);GO:0005634(nucleus);GO:0006351(transcription, DNA-templated);GO:0006355(regulation of transcription, DNA-templated);GO:0007389(pattern specification process);GO:0009733(response to auxin);GO:0009734(auxin-activated signaling pathway);GO:0035198(miRNA binding);GO:0048829(root cap development);GO:005130…	ko04075(Plant hormone signal transduction)
osa-miR160a-5p_R+2_1ss21AT	XM_016640136.1	XM_016640136.1	ARF18	hypothetical protein	1840-1862	1.8	GO:0003677(DNA binding);GO:0003700(transcription factor activity, sequence-specific DNA binding);GO:0005634(nucleus);GO:0006351(transcription, DNA-templated);GO:0006355(regulation of transcription, DNA-templated);GO:0007389(pattern specification process);GO:0009734(auxin-activated signaling pathway);GO:0009738(abscisic acid-activated signaling pathway);GO:0009743(response to carbohydrate);GO:0010…	ko04075(Plant hormone signal transduction)
osa-miR160a-5p_R+2_1ss21AT	XM_016640135.1	XM_016640135.1	ARF18	hypothetical protein	1631-1653	1.8	GO:0003677(DNA binding);GO:0003700(transcription factor activity, sequence-specific DNA binding);GO:0005634(nucleus);GO:0006351(transcription, DNA-templated);GO:0006355(regulation of transcription, DNA-templated);GO:0007389(pattern specification process);GO:0009734(auxin-activated signaling pathway);GO:0009738(abscisic acid-activated signaling pathway);GO:0009743(response to carbohydrate);GO:0010…	ko04075(Plant hormone signal transduction)
osa-miR160a-5p_R+2_1ss21AT	XM_016640134.1	XM_016640134.1	ARF18	hypothetical protein	1895-1917	1.8	GO:0003677(DNA binding);GO:0003700(transcription factor activity, sequence-specific DNA binding);GO:0005634(nucleus);GO:0006351(transcription, DNA-templated);GO:0006355(regulation of transcription, DNA-templated);GO:0007389(pattern specification process);GO:0009734(auxin-activated signaling pathway);GO:0009738(abscisic acid-activated signaling pathway);GO:0009743(response to carbohydrate);GO:0010…	ko04075(Plant hormone signal transduction)
osa-miR160a-5p_R+2_1ss21AT	XM_016657185.1	XM_016657185.1	At1g65750	uncharacterized LOC106392594	4669-4690	1	GO:0003676(nucleic acid binding);GO:0003723(RNA binding);GO:0003964(RNA-directed DNA polymerase activity);GO:0005739(mitochondrion);GO:0006278(RNA-dependent DNA biosynthetic process)	ko01210(2-Oxocarboxylic acid metabolism);ko01230(Biosynthesis of amino acids);ko00220(Arginine biosynthesis)
osa-miR160a-5p_R+2_1ss21AT	XM_016657185.1	XM_016657185.1	At1g65750	uncharacterized LOC106392594	4574-4596	2	GO:0003676(nucleic acid binding);GO:0003723(RNA binding);GO:0003964(RNA-directed DNA polymerase activity);GO:0005739(mitochondrion);GO:0006278(RNA-dependent DNA biosynthetic process)	ko01210(2-Oxocarboxylic acid metabolism);ko01230(Biosynthesis of amino acids);ko00220(Arginine biosynthesis)
osa-miR160a-5p_R+2_1ss21AT	XM_016641934.1	XM_016641934.1	ARF22	auxin response factor 7-like	2151-2173	1.8	GO:0003677(DNA binding);GO:0003700(transcription factor activity, sequence-specific DNA binding);GO:0005634(nucleus);GO:0006351(transcription, DNA-templated);GO:0006355(regulation of transcription, DNA-templated);GO:0007389(pattern specification process);GO:0009733(response to auxin);GO:0009734(auxin-activated signaling pathway);GO:0035198(miRNA binding);GO:0048829(root cap development);GO:005130…	ko04075(Plant hormone signal transduction)
osa-miR160a-5p_R+2_1ss21AT	XM_016641933.1	XM_016641933.1	ARF18	auxin response factor 7-like	2148-2170	1.8	GO:0003677(DNA binding);GO:0003700(transcription factor activity, sequence-specific DNA binding);GO:0005634(nucleus);GO:0006351(transcription, DNA-templated);GO:0006355(regulation of transcription, DNA-templated);GO:0007389(pattern specification process);GO:0009733(response to auxin);GO:0009734(auxin-activated signaling pathway);GO:0035198(miRNA binding);GO:0048829(root cap development);GO:005130…	ko04075(Plant hormone signal transduction)
osa-miR160a-5p_R+2_1ss21AT	XM_016620081.1	XM_016620081.1	ARF18	auxin response factor 7-like	2175-2197	1.8	GO:0003677(DNA binding);GO:0003700(transcription factor activity, sequence-specific DNA binding);GO:0005634(nucleus);GO:0006351(transcription, DNA-templated);GO:0006355(regulation of transcription, DNA-templated);GO:0007389(pattern specification process);GO:0009733(response to auxin);GO:0009734(auxin-activated signaling pathway);GO:0035198(miRNA binding);GO:0048829(root cap development);GO:005130…	ko04075(Plant hormone signal transduction)
osa-miR160a-5p_R+2_1ss21AT	XM_016620080.1	XM_016620080.1	ARF18	auxin response factor 7-like	2172-2194	1.8	GO:0003677(DNA binding);GO:0003700(transcription factor activity, sequence-specific DNA binding);GO:0005634(nucleus);GO:0006351(transcription, DNA-templated);GO:0006355(regulation of transcription, DNA-templated);GO:0007389(pattern specification process);GO:0009733(response to auxin);GO:0009734(auxin-activated signaling pathway);GO:0035198(miRNA binding);GO:0048829(root cap development);GO:005130…	ko04075(Plant hormone signal transduction)
osa-miR160a-5p_R+2_1ss21AT	XM_016589514.1	XM_016589514.1	ARF16	auxin response factor 7-like	1680-1702	0.8	GO:0003677(DNA binding);GO:0003700(transcription factor activity, sequence-specific DNA binding);GO:0005634(nucleus);GO:0006351(transcription, DNA-templated);GO:0006355(regulation of transcription, DNA-templated);GO:0007389(pattern specification process);GO:0009733(response to auxin);GO:0009734(auxin-activated signaling pathway);GO:0035198(miRNA binding);GO:0048829(root cap development);GO:005130…	ko04075(Plant hormone signal transduction)
osa-miR160a-5p_R+2_1ss21AT	XM_016589515.1	XM_016589515.1	ARF16	auxin response factor 7-like	1524-1546	0.8	GO:0003677(DNA binding);GO:0003700(transcription factor activity, sequence-specific DNA binding);GO:0005634(nucleus);GO:0006351(transcription, DNA-templated);GO:0006355(regulation of transcription, DNA-templated);GO:0007389(pattern specification process);GO:0009733(response to auxin);GO:0009734(auxin-activated signaling pathway);GO:0035198(miRNA binding);GO:0048829(root cap development);GO:005130…	ko04075(Plant hormone signal transduction)
aof-MIR166b-p3_1ss18CA	XM_016592610.1	XM_016592610.1	-	-	689-708	2.5	-
aof-MIR166b-p3_1ss18CA	XM_016646177.1	XM_016646177.1	ATHB-14	-	1393-1411	1.8	GO:0003677(DNA binding);GO:0003700(transcription factor activity, sequence-specific DNA binding);GO:0005634(nucleus);GO:0006351(transcription, DNA-templated);GO:0006355(regulation of transcription, DNA-templated);GO:0008289(lipid binding);GO:0009855(determination of bilateral symmetry);GO:0009944(polarity specification of adaxial/abaxial axis);GO:0009955(adaxial/abaxial pattern specification);GO:…
aof-MIR166b-p3_1ss18CA	XM_016646178.1	XM_016646178.1	ATHB-14	-	1389-1407	1.8	GO:0003677(DNA binding);GO:0003700(transcription factor activity, sequence-specific DNA binding);GO:0005634(nucleus);GO:0006351(transcription, DNA-templated);GO:0006355(regulation of transcription, DNA-templated);GO:0008289(lipid binding);GO:0009855(determination of bilateral symmetry);GO:0009944(polarity specification of adaxial/abaxial axis);GO:0009955(adaxial/abaxial pattern specification);GO:…
aof-MIR166b-p3_1ss18CA	XM_016578618.1	XM_016578618.1	ATHB-15	-	1439-1457	1.2	GO:0003677(DNA binding);GO:0003700(transcription factor activity, sequence-specific DNA binding);GO:0005634(nucleus);GO:0006351(transcription, DNA-templated);GO:0006355(regulation of transcription, DNA-templated);GO:0008289(lipid binding);GO:0009855(determination of bilateral symmetry);GO:0009887(organ morphogenesis);GO:0009965(leaf morphogenesis);GO:0010014(meristem initiation);GO:0010073(merist…
aof-MIR166b-p3_1ss18CA	XM_016578619.1	XM_016578619.1	ATHB-15	-	1540-1558	1.2	GO:0003677(DNA binding);GO:0003700(transcription factor activity, sequence-specific DNA binding);GO:0005634(nucleus);GO:0006351(transcription, DNA-templated);GO:0006355(regulation of transcription, DNA-templated);GO:0008289(lipid binding);GO:0009855(determination of bilateral symmetry);GO:0009887(organ morphogenesis);GO:0009965(leaf morphogenesis);GO:0010014(meristem initiation);GO:0010073(merist…
aof-MIR166b-p3_1ss18CA	XM_016578617.1	XM_016578617.1	ATHB-15	-	1540-1558	1.2	GO:0003677(DNA binding);GO:0003700(transcription factor activity, sequence-specific DNA binding);GO:0005634(nucleus);GO:0006351(transcription, DNA-templated);GO:0006355(regulation of transcription, DNA-templated);GO:0008289(lipid binding);GO:0009855(determination of bilateral symmetry);GO:0009887(organ morphogenesis);GO:0009965(leaf morphogenesis);GO:0010014(meristem initiation);GO:0010073(merist…
aof-MIR166b-p3_1ss18CA	XM_016647821.1	XM_016647821.1	ATHB-14	-	1362-1380	1.8	GO:0003677(DNA binding);GO:0003700(transcription factor activity, sequence-specific DNA binding);GO:0005634(nucleus);GO:0006351(transcription, DNA-templated);GO:0006355(regulation of transcription, DNA-templated);GO:0008289(lipid binding);GO:0009855(determination of bilateral symmetry);GO:0009944(polarity specification of adaxial/abaxial axis);GO:0009955(adaxial/abaxial pattern specification);GO:…
aof-MIR166b-p3_1ss18CA	XM_016647822.1	XM_016647822.1	ATHB-14	-	1358-1376	1.8	GO:0003677(DNA binding);GO:0003700(transcription factor activity, sequence-specific DNA binding);GO:0005634(nucleus);GO:0006351(transcription, DNA-templated);GO:0006355(regulation of transcription, DNA-templated);GO:0008289(lipid binding);GO:0009855(determination of bilateral symmetry);GO:0009944(polarity specification of adaxial/abaxial axis);GO:0009955(adaxial/abaxial pattern specification);GO:…
aof-MIR166b-p3_1ss18CA	XM_016649482.1	XM_016649482.1	REV	-	729-747	1.8	GO:0003677(DNA binding);GO:0003700(transcription factor activity, sequence-specific DNA binding);GO:0005634(nucleus);GO:0006351(transcription, DNA-templated);GO:0006355(regulation of transcription, DNA-templated);GO:0008289(lipid binding);GO:0009855(determination of bilateral symmetry);GO:0009944(polarity specification of adaxial/abaxial axis);GO:0009956(radial pattern formation);GO:0010014(meris…
aof-MIR166b-p3_1ss18CA	XM_016649481.1	XM_016649481.1	REV	-	1058-1076	1.8	GO:0003677(DNA binding);GO:0003700(transcription factor activity, sequence-specific DNA binding);GO:0005634(nucleus);GO:0006351(transcription, DNA-templated);GO:0006355(regulation of transcription, DNA-templated);GO:0008289(lipid binding);GO:0009855(determination of bilateral symmetry);GO:0009944(polarity specification of adaxial/abaxial axis);GO:0009956(radial pattern formation);GO:0010014(meris…
aof-MIR166b-p3_1ss18CA	XM_016598927.1	XM_016598927.1	At5g10080	-	766-785	2.5	GO:0004190(aspartic-type endopeptidase activity);GO:0006508(proteolysis);GO:0030163(protein catabolic process)
aof-MIR166b-p3_1ss18CA	XM_016601370.1	XM_016601370.1	ORF	-	166-185	2.5	-
aof-MIR166b-p3_1ss18CA	XM_016616723.1	XM_016616723.1	REV	-	1683-1701	1.8	GO:0003677(DNA binding);GO:0003700(transcription factor activity, sequence-specific DNA binding);GO:0005634(nucleus);GO:0006351(transcription, DNA-templated);GO:0006355(regulation of transcription, DNA-templated);GO:0008289(lipid binding);GO:0009855(determination of bilateral symmetry);GO:0009944(polarity specification of adaxial/abaxial axis);GO:0009956(radial pattern formation);GO:0010014(meris…
aof-MIR166b-p3_1ss18CA	XM_016654710.1	XM_016654710.1	-	-	298-317	2.5	GO:0003674(molecular_function);GO:0005634(nucleus);GO:0008150(biological_process)
aof-MIR166b-p3_1ss18CA	XM_016632624.1	XM_016632624.1	ATHB-15	-	1019-1037	1.8	GO:0003677(DNA binding);GO:0003700(transcription factor activity, sequence-specific DNA binding);GO:0005634(nucleus);GO:0006351(transcription, DNA-templated);GO:0006355(regulation of transcription, DNA-templated);GO:0008289(lipid binding);GO:0009855(determination of bilateral symmetry);GO:0009887(organ morphogenesis);GO:0009965(leaf morphogenesis);GO:0010014(meristem initiation);GO:0010073(merist…
aof-MIR166b-p3_1ss18CA	XM_016587224.1	XM_016587224.1	ATHB-15	-	984-1002	1.8	GO:0003677(DNA binding);GO:0003700(transcription factor activity, sequence-specific DNA binding);GO:0005634(nucleus);GO:0006351(transcription, DNA-templated);GO:0006355(regulation of transcription, DNA-templated);GO:0008289(lipid binding);GO:0009855(determination of bilateral symmetry);GO:0009887(organ morphogenesis);GO:0009965(leaf morphogenesis);GO:0010014(meristem initiation);GO:0010073(merist…
aof-MIR166b-p3_1ss18CA	XM_016656065.1	XM_016656065.1	-	-	297-316	2.5	GO:0003674(molecular_function);GO:0005634(nucleus);GO:0008150(biological_process)
aof-MIR166b-p3_1ss18CA	XM_016603593.1	XM_016603593.1	ATHB-15	uncharacterized LOC104455787	1453-1471	1.2	GO:0003677(DNA binding);GO:0003700(transcription factor activity, sequence-specific DNA binding);GO:0005634(nucleus);GO:0006351(transcription, DNA-templated);GO:0006355(regulation of transcription, DNA-templated);GO:0008289(lipid binding);GO:0009855(determination of bilateral symmetry);GO:0009887(organ morphogenesis);GO:0009965(leaf morphogenesis);GO:0010014(meristem initiation);GO:0010073(merist…	ko00750(Vitamin B6 metabolism)
aof-MIR166b-p3_1ss18CA	XM_016603592.1	XM_016603592.1	ATHB-15	-	1491-1509	1.2	GO:0003677(DNA binding);GO:0003700(transcription factor activity, sequence-specific DNA binding);GO:0005634(nucleus);GO:0006351(transcription, DNA-templated);GO:0006355(regulation of transcription, DNA-templated);GO:0008289(lipid binding);GO:0009855(determination of bilateral symmetry);GO:0009887(organ morphogenesis);GO:0009965(leaf morphogenesis);GO:0010014(meristem initiation);GO:0010073(merist…
aof-MIR166b-p3_1ss18CA	XM_016588431.1	XM_016588431.1	PRS3	ribose-phosphate pyrophosphokinase 1-like	4-24	2.2	GO:0000287(magnesium ion binding);GO:0004749(ribose phosphate diphosphokinase activity);GO:0005524(ATP binding);GO:0009116(nucleoside metabolic process);GO:0009165(nucleotide biosynthetic process);GO:0009507(chloroplast);GO:0016301(kinase activity);GO:0016310(phosphorylation)	ko01200(Carbon metabolism);ko01230(Biosynthesis of amino acids);ko00030(Pentose phosphate pathway);ko00230(Purine metabolism)
aof-MIR166b-p3_1ss18CA	XM_016657470.1	XM_016657470.1	ATHB-15	-	1517-1535	1.2	GO:0003677(DNA binding);GO:0003700(transcription factor activity, sequence-specific DNA binding);GO:0005634(nucleus);GO:0006351(transcription, DNA-templated);GO:0006355(regulation of transcription, DNA-templated);GO:0008289(lipid binding);GO:0009855(determination of bilateral symmetry);GO:0009887(organ morphogenesis);GO:0009965(leaf morphogenesis);GO:0010014(meristem initiation);GO:0010073(merist…
aof-MIR166b-p3_1ss18CA	XM_016657547.1	XM_016657547.1	TCX5	-	529-548	2.5	GO:0003700(transcription factor activity, sequence-specific DNA binding);GO:0005634(nucleus);GO:0006355(regulation of transcription, DNA-templated);GO:0007275(multicellular organism development);GO:0046872(metal ion binding)
aof-MIR166b-p3_1ss18CA	XM_016643130.1	XM_016643130.1	ATHB-15	-	1537-1555	1.2	GO:0003677(DNA binding);GO:0003700(transcription factor activity, sequence-specific DNA binding);GO:0005634(nucleus);GO:0006351(transcription, DNA-templated);GO:0006355(regulation of transcription, DNA-templated);GO:0008289(lipid binding);GO:0009855(determination of bilateral symmetry);GO:0009887(organ morphogenesis);GO:0009965(leaf morphogenesis);GO:0010014(meristem initiation);GO:0010073(merist…
aof-MIR166b-p3_1ss18CA	XM_016605851.1	XM_016605851.1	AKR4C10	aldo-keto reductase family 4 member C9-like	591-609	1.8	GO:0005634(nucleus);GO:0005737(cytoplasm);GO:0005829(cytosol);GO:0016491(oxidoreductase activity);GO:0055114(oxidation-reduction process)	ko00040(Pentose and glucuronate interconversions);ko00051(Fructose and mannose metabolism);ko00052(Galactose metabolism);ko00561(Glycerolipid metabolism)
aof-MIR166b-p3_1ss18CA	XM_016636444.1	XM_016636444.1	-	-	109-128	2.5	GO:0003674(molecular_function);GO:0005575(cellular_component);GO:0008150(biological_process)
stu-MIR395f-p5_1ss13AG	XM_016592010.1	XM_016592010.1	-	hypothetical protein	1602-1623	2.5	GO:0003677(DNA binding);GO:0005634(nucleus);GO:0005739(mitochondrion);GO:0005829(cytosol)	ko00073(Cutin, suberine and wax biosynthesis)
stu-MIR395f-p5_1ss13AG	XM_016592009.1	XM_016592009.1	-	hypothetical protein	1602-1623	2.5	GO:0003677(DNA binding);GO:0005634(nucleus);GO:0005739(mitochondrion);GO:0005829(cytosol)	ko00073(Cutin, suberine and wax biosynthesis)
stu-MIR395f-p5_1ss13AG	XM_016592011.1	XM_016592011.1	-	hypothetical protein	1594-1615	2.5	GO:0003677(DNA binding);GO:0005634(nucleus);GO:0005739(mitochondrion);GO:0005829(cytosol)	ko00073(Cutin, suberine and wax biosynthesis)
stu-MIR395f-p5_1ss13AG	XM_016592008.1	XM_016592008.1	-	hypothetical protein	1601-1622	2.5	GO:0003677(DNA binding);GO:0005634(nucleus);GO:0005739(mitochondrion);GO:0005829(cytosol)	ko00073(Cutin, suberine and wax biosynthesis)
stu-MIR395f-p5_1ss13AG	XM_016623485.1	XM_016623485.1	THG1	-	999-1018	2.5	GO:0008033(tRNA processing);GO:0008193(tRNA guanylyltransferase activity)
stu-MIR395f-p5_1ss13AG	XM_016623701.1	XM_016623701.1	At5g51830	probable fructokinase-7	1139-1158	2.5	GO:0004747(ribokinase activity);GO:0005524(ATP binding);GO:0005737(cytoplasm);GO:0005829(cytosol);GO:0006014(D-ribose metabolic process);GO:0008865(fructokinase activity);GO:0016301(kinase activity);GO:0019252(starch biosynthetic process);GO:0046686(response to cadmium ion)	ko00051(Fructose and mannose metabolism);ko00500(Starch and sucrose metabolism);ko00520(Amino sugar and nucleotide sugar metabolism)
stu-MIR395f-p5_1ss13AG	XM_016646074.1	XM_016646074.1	-	hypothetical protein	1601-1622	2.5	GO:0003677(DNA binding);GO:0005634(nucleus);GO:0005739(mitochondrion);GO:0005829(cytosol)	ko00073(Cutin, suberine and wax biosynthesis)
stu-MIR395f-p5_1ss13AG	XM_016646073.1	XM_016646073.1	-	hypothetical protein	1604-1625	2.5	GO:0003677(DNA binding);GO:0005634(nucleus);GO:0005739(mitochondrion);GO:0005829(cytosol)	ko00073(Cutin, suberine and wax biosynthesis)
stu-MIR395f-p5_1ss13AG	XM_016609199.1	XM_016609199.1	-	S-linalool synthase-like	128-148	2.5	-	ko00904(Diterpenoid biosynthesis)
stu-MIR395f-p5_1ss13AG	XM_016610644.1	XM_016610644.1	THG1	-	1134-1153	2.5	GO:0008033(tRNA processing);GO:0008193(tRNA guanylyltransferase activity)
stu-MIR395f-p5_1ss13AG	XM_016610987.1	XM_016610987.1	IPK2b	inositol polyphosphate multikinase	199-219	2.5	GO:0000823(inositol-1,4,5-trisphosphate 6-kinase activity);GO:0000824(inositol tetrakisphosphate 3-kinase activity);GO:0005524(ATP binding);GO:0005634(nucleus);GO:0005886(plasma membrane);GO:0006355(regulation of transcription, DNA-templated);GO:0008440(inositol-1,4,5-trisphosphate 3-kinase activity);GO:0009555(pollen development);GO:0009793(embryo development ending in seed dormancy);GO:0010183(…	ko00562(Inositol phosphate metabolism);ko04070(Phosphatidylinositol signaling system)
stu-MIR395f-p5_1ss13AG	XM_016610988.1	XM_016610988.1	IPK2b	inositol polyphosphate multikinase	1996-2016	2.5	GO:0000823(inositol-1,4,5-trisphosphate 6-kinase activity);GO:0000824(inositol tetrakisphosphate 3-kinase activity);GO:0005524(ATP binding);GO:0005634(nucleus);GO:0005886(plasma membrane);GO:0006355(regulation of transcription, DNA-templated);GO:0008440(inositol-1,4,5-trisphosphate 3-kinase activity);GO:0009555(pollen development);GO:0009793(embryo development ending in seed dormancy);GO:0010183(…	ko00562(Inositol phosphate metabolism);ko04070(Phosphatidylinositol signaling system)
stu-MIR395f-p5_1ss13AG	XM_016614583.1	XM_016614583.1	At1g05910	cell division control protein 48 homolog E	3338-3358	2.5	GO:0003682(chromatin binding);GO:0005634(nucleus);GO:0016887(ATPase activity);GO:0031936(negative regulation of chromatin silencing);GO:0042393(histone binding);GO:0045944(positive regulation of transcription from RNA polymerase II promoter)	ko04141(Protein processing in endoplasmic reticulum)
stu-MIR395f-p5_1ss13AG	XM_016614582.1	XM_016614582.1	At1g05910	cell division control protein 48 homolog E	3599-3619	2.5	GO:0003682(chromatin binding);GO:0005634(nucleus);GO:0016887(ATPase activity);GO:0031936(negative regulation of chromatin silencing);GO:0042393(histone binding);GO:0045944(positive regulation of transcription from RNA polymerase II promoter)	ko04141(Protein processing in endoplasmic reticulum)
stu-MIR395f-p5_1ss13AG	XM_016614581.1	XM_016614581.1	At1g05910	cell division control protein 48 homolog E	3604-3624	2.5	GO:0003682(chromatin binding);GO:0005634(nucleus);GO:0016887(ATPase activity);GO:0031936(negative regulation of chromatin silencing);GO:0042393(histone binding);GO:0045944(positive regulation of transcription from RNA polymerase II promoter)	ko04141(Protein processing in endoplasmic reticulum)
stu-MIR395f-p5_1ss13AG	XM_016621551.1	XM_016621551.1	-	-	318-338	2.5	-
stu-MIR395f-p5_1ss13AG	XM_016617915.1	XM_016617915.1	-	-	87-107	2.5	GO:0003777(microtubule motor activity);GO:0005871(kinesin complex);GO:0007018(microtubule-based movement);GO:0016887(ATPase activity)
stu-MIR395f-p5_1ss13AG	XM_016655944.1	XM_016655944.1	RH3	Glutamate-cysteine ligase	311-331	2.2	GO:0004004(ATP-dependent RNA helicase activity);GO:0010501(RNA secondary structure unwinding)	ko00270(Cysteine and methionine metabolism);ko00480(Glutathione metabolism)
stu-MIR395f-p5_1ss13AG	XM_016618297.1	XM_016618297.1	GAI1	hypothetical protein	1544-1564	2.5	GO:0003700(transcription factor activity, sequence-specific DNA binding);GO:0005634(nucleus);GO:0006355(regulation of transcription, DNA-templated);GO:0043565(sequence-specific DNA binding)	ko04075(Plant hormone signal transduction)
stu-MIR395f-p5_1ss13AG	XM_016604545.1	XM_016604545.1	SFH1	Glutamyl-tRNA(Gln) amidotransferase subunit A	272-291	2.5	GO:0000139(Golgi membrane);GO:0005215(transporter activity);GO:0005739(mitochondrion);GO:0005886(plasma membrane);GO:0006810(transport);GO:0008526(phosphatidylinositol transporter activity);GO:0009932(cell tip growth);GO:0010053(root epidermal cell differentiation);GO:0015031(protein transport);GO:0035619(root hair tip);GO:0048767(root hair elongation);GO:0048768(root hair cell tip growth)	ko00970(Aminoacyl-tRNA biosynthesis)
stu-MIR395f-p5_1ss13AG	XM_016604543.1	XM_016604543.1	SFH1	Glutamyl-tRNA(Gln) amidotransferase subunit A	274-293	2.5	GO:0000139(Golgi membrane);GO:0005215(transporter activity);GO:0005739(mitochondrion);GO:0005886(plasma membrane);GO:0006810(transport);GO:0008526(phosphatidylinositol transporter activity);GO:0009932(cell tip growth);GO:0010053(root epidermal cell differentiation);GO:0015031(protein transport);GO:0035619(root hair tip);GO:0048767(root hair elongation);GO:0048768(root hair cell tip growth)	ko00970(Aminoacyl-tRNA biosynthesis)
stu-MIR395f-p5_1ss13AG	XM_016604544.1	XM_016604544.1	SFH1	Glutamyl-tRNA(Gln) amidotransferase subunit A	276-295	2.5	GO:0000139(Golgi membrane);GO:0005215(transporter activity);GO:0005739(mitochondrion);GO:0005886(plasma membrane);GO:0006810(transport);GO:0008526(phosphatidylinositol transporter activity);GO:0009932(cell tip growth);GO:0010053(root epidermal cell differentiation);GO:0015031(protein transport);GO:0035619(root hair tip);GO:0048767(root hair elongation);GO:0048768(root hair cell tip growth)	ko00970(Aminoacyl-tRNA biosynthesis)
stu-MIR395f-p5_1ss13AG	XM_016604546.1	XM_016604546.1	SFH1	Glutamyl-tRNA(Gln) amidotransferase subunit A	277-296	2.5	GO:0000139(Golgi membrane);GO:0005215(transporter activity);GO:0005739(mitochondrion);GO:0005886(plasma membrane);GO:0006810(transport);GO:0008526(phosphatidylinositol transporter activity);GO:0009932(cell tip growth);GO:0010053(root epidermal cell differentiation);GO:0015031(protein transport);GO:0035619(root hair tip);GO:0048767(root hair elongation);GO:0048768(root hair cell tip growth)	ko00970(Aminoacyl-tRNA biosynthesis)
stu-miR477a-5p	XM_016608623.1	XM_016608623.1	CDC73	-	558-578	2.5	GO:0005515(protein binding);GO:0005634(nucleus);GO:0006355(regulation of transcription, DNA-templated);GO:0006368(transcription elongation from RNA polymerase II promoter);GO:0009908(flower development);GO:0009911(positive regulation of flower development);GO:0010228(vegetative to reproductive phase transition of meristem);GO:0016593(Cdc73/Paf1 complex);GO:0051568(histone H3-K4 methylation);GO:00…
stu-miR477a-5p	XM_016608626.1	XM_016608626.1	CDC73	-	558-578	2.5	GO:0005515(protein binding);GO:0005634(nucleus);GO:0006355(regulation of transcription, DNA-templated);GO:0006368(transcription elongation from RNA polymerase II promoter);GO:0009908(flower development);GO:0009911(positive regulation of flower development);GO:0010228(vegetative to reproductive phase transition of meristem);GO:0016593(Cdc73/Paf1 complex);GO:0051568(histone H3-K4 methylation);GO:00…
stu-miR477a-5p	XM_016608625.1	XM_016608625.1	CDC73	-	558-578	2.5	GO:0005515(protein binding);GO:0005634(nucleus);GO:0006355(regulation of transcription, DNA-templated);GO:0006368(transcription elongation from RNA polymerase II promoter);GO:0009908(flower development);GO:0009911(positive regulation of flower development);GO:0010228(vegetative to reproductive phase transition of meristem);GO:0016593(Cdc73/Paf1 complex);GO:0051568(histone H3-K4 methylation);GO:00…
stu-miR477a-5p	XM_016608627.1	XM_016608627.1	CDC73	-	558-578	2.5	GO:0005515(protein binding);GO:0005634(nucleus);GO:0006355(regulation of transcription, DNA-templated);GO:0006368(transcription elongation from RNA polymerase II promoter);GO:0009908(flower development);GO:0009911(positive regulation of flower development);GO:0010228(vegetative to reproductive phase transition of meristem);GO:0016593(Cdc73/Paf1 complex);GO:0051568(histone H3-K4 methylation);GO:00…
stu-miR477a-5p	XM_016647528.1	XM_016647528.1	CDC73	-	535-555	2.5	GO:0005515(protein binding);GO:0005634(nucleus);GO:0006355(regulation of transcription, DNA-templated);GO:0006368(transcription elongation from RNA polymerase II promoter);GO:0009908(flower development);GO:0009911(positive regulation of flower development);GO:0010228(vegetative to reproductive phase transition of meristem);GO:0016593(Cdc73/Paf1 complex);GO:0051568(histone H3-K4 methylation);GO:00…
stu-miR477a-5p	XM_016595254.1	XM_016595254.1	CRK3	CDPK-related kinase 3-like	2143-2162	2.5	GO:0004683(calmodulin-dependent protein kinase activity);GO:0005516(calmodulin binding);GO:0005634(nucleus);GO:0005737(cytoplasm);GO:0005886(plasma membrane);GO:0009738(abscisic acid-activated signaling pathway);GO:0009931(calcium-dependent protein serine/threonine kinase activity);GO:0018105(peptidyl-serine phosphorylation);GO:0035556(intracellular signal transduction);GO:0046777(protein autopho…	ko04626(Plant-pathogen interaction)
stu-miR477a-5p	XM_016579543.1				635-656	2.2	-
stu-miR477a-5p	XM_016610947.1	XM_016610947.1	RFC3	replication factor C subunit 3-like	947-967	1.2	GO:0003689(DNA clamp loader activity);GO:0005663(DNA replication factor C complex);GO:0006261(DNA-dependent DNA replication)	ko03030(DNA replication);ko03420(Nucleotide excision repair);ko03430(Mismatch repair)
stu-miR477a-5p	XM_016580495.1	XM_016580495.1	PUB33	G-type lectin S-receptor-like serine/threonine-protein kinase At1g11300	1234-1254	2.5	GO:0004674(protein serine/threonine kinase activity);GO:0004842(ubiquitin-protein transferase activity);GO:0005524(ATP binding);GO:0005886(plasma membrane);GO:0006468(protein phosphorylation);GO:0016301(kinase activity);GO:0016567(protein ubiquitination);GO:0016874(ligase activity)	ko00520(Amino sugar and nucleotide sugar metabolism)
stu-miR477a-5p	XM_016580494.1	XM_016580494.1	PUB33	G-type lectin S-receptor-like serine/threonine-protein kinase At1g11300	1312-1332	2.5	GO:0004674(protein serine/threonine kinase activity);GO:0004842(ubiquitin-protein transferase activity);GO:0005524(ATP binding);GO:0005886(plasma membrane);GO:0006468(protein phosphorylation);GO:0016301(kinase activity);GO:0016567(protein ubiquitination);GO:0016874(ligase activity)	ko00520(Amino sugar and nucleotide sugar metabolism)
stu-miR477a-5p	XM_016653981.1				676-697	2.2	-
stu-miR477a-5p	XM_016585900.1	XM_016585900.1	GAI	hypothetical protein	786-805	1.5	GO:0003700(transcription factor activity, sequence-specific DNA binding);GO:0005634(nucleus);GO:0006355(regulation of transcription, DNA-templated);GO:0043565(sequence-specific DNA binding)	ko04075(Plant hormone signal transduction)
stu-miR477a-5p	XM_016640051.1	XM_016640051.1	RGA2	hypothetical protein	786-805	1.5	GO:0003700(transcription factor activity, sequence-specific DNA binding);GO:0005634(nucleus);GO:0006355(regulation of transcription, DNA-templated);GO:0043565(sequence-specific DNA binding)	ko04075(Plant hormone signal transduction)
stu-miR477a-5p	XM_016602971.1				771-792	2	-
stu-miR477a-5p	XM_016619733.1	XM_016619733.1	RFC3	replication factor C subunit 3-like	260-280	1.2	GO:0003689(DNA clamp loader activity);GO:0005663(DNA replication factor C complex);GO:0006261(DNA-dependent DNA replication)	ko03030(DNA replication);ko03420(Nucleotide excision repair);ko03430(Mismatch repair)
stu-miR477a-5p	XM_016644000.1	XM_016644000.1	R1B-14	disease resistance protein RPP13-like	3633-3653	2	GO:0005524(ATP binding);GO:0006952(defense response);GO:0009506(plasmodesma);GO:0043531(ADP binding)	ko04626(Plant-pathogen interaction)
stu-miR477a-5p	XM_016643999.1	XM_016643999.1	R1B-14	disease resistance protein RPP13-like	3587-3607	2	GO:0005524(ATP binding);GO:0006952(defense response);GO:0009506(plasmodesma);GO:0043531(ADP binding)	ko04626(Plant-pathogen interaction)
stu-miR477a-5p	XM_016644001.1	XM_016644001.1	R1B-14	disease resistance protein RPP13-like	3504-3524	2	GO:0005524(ATP binding);GO:0006952(defense response);GO:0009506(plasmodesma);GO:0043531(ADP binding)	ko04626(Plant-pathogen interaction)
stu-miR477a-5p	XM_016644002.1	XM_016644002.1	R1B-14	disease resistance protein RPP13-like	3577-3597	2	GO:0005524(ATP binding);GO:0006952(defense response);GO:0009506(plasmodesma);GO:0043531(ADP binding)	ko04626(Plant-pathogen interaction)
stu-miR477a-5p	XM_016644003.1	XM_016644003.1	R1B-14	disease resistance protein RPP13-like	3526-3546	2	GO:0005524(ATP binding);GO:0006952(defense response);GO:0009506(plasmodesma);GO:0043531(ADP binding)	ko04626(Plant-pathogen interaction)
stu-miR477a-5p	XM_016644004.1	XM_016644004.1	R1B-14	disease resistance protein RPP13-like	3411-3431	2	GO:0005524(ATP binding);GO:0006952(defense response);GO:0009506(plasmodesma);GO:0043531(ADP binding)	ko04626(Plant-pathogen interaction)
cme-miR156a_1ss1TC	XM_016593114.1	XM_016593114.1	-	-	693-713	0.5	GO:0004004(ATP-dependent RNA helicase activity);GO:0010501(RNA secondary structure unwinding)
cme-miR156a_1ss1TC	XM_016644496.1	XM_016644496.1	-	-	1704-1723	2.5	-
cme-miR156a_1ss1TC	XM_016608923.1	XM_016608923.1	-	uncharacterized LOC104808371	48-66	2.5	-	ko00040(Pentose and glucuronate interconversions);ko00052(Galactose metabolism);ko00053(Ascorbate and aldarate metabolism);ko00520(Amino sugar and nucleotide sugar metabolism)
cme-miR156a_1ss1TC	XM_016647219.1	XM_016647219.1	TKT2	probable 1-deoxy-D-xylulose-5-phosphate synthase	2147-2166	2.5	GO:0005739(mitochondrion);GO:0008661(1-deoxy-D-xylulose-5-phosphate synthase activity);GO:0016114(terpenoid biosynthetic process)	ko00730(Thiamine metabolism);ko00900(Terpenoid backbone biosynthesis)
cme-miR156a_1ss1TC	XM_016649207.1	XM_016649207.1	SPL12	-	1488-1507	1.5	GO:0003677(DNA binding);GO:0003700(transcription factor activity, sequence-specific DNA binding);GO:0005634(nucleus);GO:0006351(transcription, DNA-templated);GO:0006355(regulation of transcription, DNA-templated);GO:0044212(transcription regulatory region DNA binding);GO:0046872(metal ion binding);GO:0048510(regulation of timing of transition from vegetative to reproductive phase);GO:0048653(anth…
cme-miR156a_1ss1TC	XM_016649220.1	XM_016649220.1	SPL12	-	1487-1506	1.5	GO:0003677(DNA binding);GO:0003700(transcription factor activity, sequence-specific DNA binding);GO:0005634(nucleus);GO:0006351(transcription, DNA-templated);GO:0006355(regulation of transcription, DNA-templated);GO:0044212(transcription regulatory region DNA binding);GO:0046872(metal ion binding);GO:0048510(regulation of timing of transition from vegetative to reproductive phase);GO:0048653(anth…
cme-miR156a_1ss1TC	XM_016649213.1	XM_016649213.1	SPL12	-	1520-1539	1.5	GO:0003677(DNA binding);GO:0003700(transcription factor activity, sequence-specific DNA binding);GO:0005634(nucleus);GO:0006351(transcription, DNA-templated);GO:0006355(regulation of transcription, DNA-templated);GO:0044212(transcription regulatory region DNA binding);GO:0046872(metal ion binding);GO:0048510(regulation of timing of transition from vegetative to reproductive phase);GO:0048653(anth…
cme-miR156a_1ss1TC	XM_016649198.1	XM_016649198.1	SPL12	-	1482-1501	1.5	GO:0003677(DNA binding);GO:0003700(transcription factor activity, sequence-specific DNA binding);GO:0005634(nucleus);GO:0006351(transcription, DNA-templated);GO:0006355(regulation of transcription, DNA-templated);GO:0044212(transcription regulatory region DNA binding);GO:0046872(metal ion binding);GO:0048510(regulation of timing of transition from vegetative to reproductive phase);GO:0048653(anth…
cme-miR156a_1ss1TC	XM_016649225.1	XM_016649225.1	SPL12	-	1450-1469	1.5	GO:0003677(DNA binding);GO:0003700(transcription factor activity, sequence-specific DNA binding);GO:0005634(nucleus);GO:0006351(transcription, DNA-templated);GO:0006355(regulation of transcription, DNA-templated);GO:0044212(transcription regulatory region DNA binding);GO:0046872(metal ion binding);GO:0048510(regulation of timing of transition from vegetative to reproductive phase);GO:0048653(anth…
cme-miR156a_1ss1TC	XM_016578265.1	XM_016578265.1	SBP1	-	1125-1144	1.5	GO:0003677(DNA binding);GO:0003700(transcription factor activity, sequence-specific DNA binding);GO:0005634(nucleus);GO:0005737(cytoplasm);GO:0006351(transcription, DNA-templated);GO:0006355(regulation of transcription, DNA-templated);GO:0010321(regulation of vegetative phase change);GO:0046872(metal ion binding)
cme-miR156a_1ss1TC	XM_016594406.1	XM_016594406.1	SPL6	-	1606-1625	1.5	GO:0003677(DNA binding);GO:0003700(transcription factor activity, sequence-specific DNA binding);GO:0005634(nucleus);GO:0006351(transcription, DNA-templated);GO:0006355(regulation of transcription, DNA-templated);GO:0010468(regulation of gene expression);GO:0042742(defense response to bacterium);GO:0046872(metal ion binding)
cme-miR156a_1ss1TC	XM_016594405.1	XM_016594405.1	SPL6	-	1606-1625	1.5	GO:0003677(DNA binding);GO:0003700(transcription factor activity, sequence-specific DNA binding);GO:0005634(nucleus);GO:0006351(transcription, DNA-templated);GO:0006355(regulation of transcription, DNA-templated);GO:0010468(regulation of gene expression);GO:0042742(defense response to bacterium);GO:0046872(metal ion binding)
cme-miR156a_1ss1TC	XM_016647076.1	XM_016647076.1	SPL6	-	1421-1440	1.5	GO:0003677(DNA binding);GO:0003700(transcription factor activity, sequence-specific DNA binding);GO:0005634(nucleus);GO:0006351(transcription, DNA-templated);GO:0006355(regulation of transcription, DNA-templated);GO:0010468(regulation of gene expression);GO:0042742(defense response to bacterium);GO:0046872(metal ion binding)
cme-miR156a_1ss1TC	XM_016580674.1	XM_016580674.1	SPL10	uncharacterized LOC103401427	706-725	2	GO:0003677(DNA binding);GO:0005634(nucleus);GO:0005737(cytoplasm);GO:0006351(transcription, DNA-templated);GO:0006355(regulation of transcription, DNA-templated);GO:0009554(megasporogenesis);GO:0009556(microsporogenesis);GO:0030154(cell differentiation);GO:0046872(metal ion binding);GO:0048653(anther development)	ko04075(Plant hormone signal transduction)
cme-miR156a_1ss1TC	XM_016579648.1	XM_016579648.1	At1g60420	-	1947-1966	2.5	GO:0005829(cytosol);GO:0009860(pollen tube growth);GO:0010183(pollen tube guidance);GO:0045454(cell redox homeostasis);GO:0046686(response to cadmium ion);GO:0047134(protein-disulfide reductase activity);GO:0055114(oxidation-reduction process);GO:0080092(regulation of pollen tube growth)
cme-miR156a_1ss1TC	XM_016585056.1	XM_016585056.1	-	-	174-193	2.5	GO:0005739(mitochondrion);GO:0016021(integral component of membrane)
cme-miR156a_1ss1TC	XM_016611390.1	XM_016611390.1	SPL5	-	714-733	2	GO:0003677(DNA binding);GO:0003700(transcription factor activity, sequence-specific DNA binding);GO:0005634(nucleus);GO:0005737(cytoplasm);GO:0006351(transcription, DNA-templated);GO:0006355(regulation of transcription, DNA-templated);GO:0010321(regulation of vegetative phase change);GO:0046872(metal ion binding)
cme-miR156a_1ss1TC	XM_016626965.1	XM_016626965.1	TGA1	-	1371-1390	1.5	GO:0003677(DNA binding);GO:0003700(transcription factor activity, sequence-specific DNA binding);GO:0005634(nucleus);GO:0006351(transcription, DNA-templated);GO:0006355(regulation of transcription, DNA-templated);GO:0046872(metal ion binding);GO:0048653(anther development)
cme-miR156a_1ss1TC	XM_016626964.1	XM_016626964.1	TGA1	-	1164-1183	1.5	GO:0003677(DNA binding);GO:0003700(transcription factor activity, sequence-specific DNA binding);GO:0005634(nucleus);GO:0006351(transcription, DNA-templated);GO:0006355(regulation of transcription, DNA-templated);GO:0046872(metal ion binding);GO:0048653(anther development)
cme-miR156a_1ss1TC	XM_016626967.1	XM_016626967.1	TGA1	-	1167-1186	1.5	GO:0003677(DNA binding);GO:0003700(transcription factor activity, sequence-specific DNA binding);GO:0005634(nucleus);GO:0006351(transcription, DNA-templated);GO:0006355(regulation of transcription, DNA-templated);GO:0046872(metal ion binding);GO:0048653(anther development)
cme-miR156a_1ss1TC	XM_016626963.1	XM_016626963.1	TGA1	-	1493-1512	1.5	GO:0003677(DNA binding);GO:0003700(transcription factor activity, sequence-specific DNA binding);GO:0005634(nucleus);GO:0006351(transcription, DNA-templated);GO:0006355(regulation of transcription, DNA-templated);GO:0046872(metal ion binding);GO:0048653(anther development)
cme-miR156a_1ss1TC	XM_016626966.1	XM_016626966.1	TGA1	-	1496-1515	1.5	GO:0003677(DNA binding);GO:0003700(transcription factor activity, sequence-specific DNA binding);GO:0005634(nucleus);GO:0006351(transcription, DNA-templated);GO:0006355(regulation of transcription, DNA-templated);GO:0046872(metal ion binding);GO:0048653(anther development)
cme-miR156a_1ss1TC	XM_016580558.1	XM_016580558.1	GAUT11	probable galacturonosyltransferase 11	2237-2255	2.5	GO:0000139(Golgi membrane);GO:0005794(Golgi apparatus);GO:0010192(mucilage biosynthetic process);GO:0016021(integral component of membrane);GO:0045489(pectin biosynthetic process);GO:0047262(polygalacturonate 4-alpha-galacturonosyltransferase activity);GO:0071555(cell wall organization)	ko00500(Starch and sucrose metabolism);ko00520(Amino sugar and nucleotide sugar metabolism)
cme-miR156a_1ss1TC	XM_016611687.1	XM_016611687.1	SPL6	-	1633-1652	1.5	GO:0003677(DNA binding);GO:0003700(transcription factor activity, sequence-specific DNA binding);GO:0005634(nucleus);GO:0006351(transcription, DNA-templated);GO:0006355(regulation of transcription, DNA-templated);GO:0010468(regulation of gene expression);GO:0042742(defense response to bacterium);GO:0046872(metal ion binding)
cme-miR156a_1ss1TC	XM_016594676.1	XM_016594676.1	RBCS	ribulose bisphosphate carboxylase small chain clone 512-like	1-20	2.5	GO:0004497(monooxygenase activity);GO:0005507(copper ion binding);GO:0009409(response to cold);GO:0009507(chloroplast);GO:0009535(chloroplast thylakoid membrane);GO:0009570(chloroplast stroma);GO:0009573(chloroplast ribulose bisphosphate carboxylase complex);GO:0009579(thylakoid);GO:0009637(response to blue light);GO:0009853(photorespiration);GO:0009941(chloroplast envelope);GO:0010114(response t…	ko01200(Carbon metabolism);ko00630(Glyoxylate and dicarboxylate metabolism);ko00710(Carbon fixation in photosynthetic organisms)
cme-miR156a_1ss1TC	XM_016649820.1	XM_016649820.1	SPL17	-	896-915	1.5	GO:0003677(DNA binding);GO:0003700(transcription factor activity, sequence-specific DNA binding);GO:0005634(nucleus);GO:0006351(transcription, DNA-templated);GO:0006355(regulation of transcription, DNA-templated);GO:0008361(regulation of cell size);GO:0010228(vegetative to reproductive phase transition of meristem);GO:0042127(regulation of cell proliferation);GO:0046872(metal ion binding);GO:0048…
cme-miR156a_1ss1TC	XM_016650409.1	XM_016650409.1	-	-	53-72	2.5	GO:0005737(cytoplasm);GO:0008757(S-adenosylmethionine-dependent methyltransferase activity);GO:0032259(methylation)
cme-miR156a_1ss1TC	XM_016613027.1	XM_016613027.1	-	-	35-53	2.5	GO:0005758(mitochondrial intermembrane space);GO:1990050(phosphatidic acid transporter activity)
cme-miR156a_1ss1TC	XM_016598217.1	XM_016598217.1	SPL6	-	1410-1429	1.5	GO:0003677(DNA binding);GO:0003700(transcription factor activity, sequence-specific DNA binding);GO:0005634(nucleus);GO:0006351(transcription, DNA-templated);GO:0006355(regulation of transcription, DNA-templated);GO:0010468(regulation of gene expression);GO:0042742(defense response to bacterium);GO:0046872(metal ion binding)
cme-miR156a_1ss1TC	XM_016651177.1	XM_016651177.1	SPL3	-	1406-1425	1.5	GO:0003677(DNA binding);GO:0003700(transcription factor activity, sequence-specific DNA binding);GO:0005634(nucleus);GO:0006351(transcription, DNA-templated);GO:0006355(regulation of transcription, DNA-templated);GO:0044212(transcription regulatory region DNA binding);GO:0046872(metal ion binding);GO:0048510(regulation of timing of transition from vegetative to reproductive phase);GO:0048653(anth…
cme-miR156a_1ss1TC	XM_016651175.1	XM_016651175.1	SPL3	-	2099-2118	1.5	GO:0003677(DNA binding);GO:0003700(transcription factor activity, sequence-specific DNA binding);GO:0005634(nucleus);GO:0006351(transcription, DNA-templated);GO:0006355(regulation of transcription, DNA-templated);GO:0044212(transcription regulatory region DNA binding);GO:0046872(metal ion binding);GO:0048510(regulation of timing of transition from vegetative to reproductive phase);GO:0048653(anth…
cme-miR156a_1ss1TC	XM_016651176.1	XM_016651176.1	SPL3	-	1394-1413	1.5	GO:0003677(DNA binding);GO:0003700(transcription factor activity, sequence-specific DNA binding);GO:0005634(nucleus);GO:0006351(transcription, DNA-templated);GO:0006355(regulation of transcription, DNA-templated);GO:0044212(transcription regulatory region DNA binding);GO:0046872(metal ion binding);GO:0048510(regulation of timing of transition from vegetative to reproductive phase);GO:0048653(anth…
cme-miR156a_1ss1TC	XM_016651174.1	XM_016651174.1	SPL3	-	1575-1594	1.5	GO:0003677(DNA binding);GO:0003700(transcription factor activity, sequence-specific DNA binding);GO:0005634(nucleus);GO:0006351(transcription, DNA-templated);GO:0006355(regulation of transcription, DNA-templated);GO:0044212(transcription regulatory region DNA binding);GO:0046872(metal ion binding);GO:0048510(regulation of timing of transition from vegetative to reproductive phase);GO:0048653(anth…
cme-miR156a_1ss1TC	XM_016651411.1	XM_016651411.1	UGT73C3	UDP-glycosyltransferase 73C5	513-531	2.5	GO:0009813(flavonoid biosynthetic process);GO:0043231(intracellular membrane-bounded organelle);GO:0052696(flavonoid glucuronidation);GO:0080043(quercetin 3-O-glucosyltransferase activity);GO:0080044(quercetin 7-O-glucosyltransferase activity)	ko00908(Zeatin biosynthesis)
cme-miR156a_1ss1TC	XM_016598934.1	XM_016598934.1	At2g30780	-	3910-3929	2.5	GO:0003674(molecular_function);GO:0005739(mitochondrion);GO:0008150(biological_process)
cme-miR156a_1ss1TC	XM_016598935.1	XM_016598935.1	At2g30780	-	3910-3929	2.5	GO:0003674(molecular_function);GO:0005739(mitochondrion);GO:0008150(biological_process)
cme-miR156a_1ss1TC	XM_016598938.1	XM_016598938.1	At2g30780	-	3910-3929	2.5	GO:0003674(molecular_function);GO:0005739(mitochondrion);GO:0008150(biological_process)
cme-miR156a_1ss1TC	XM_016598937.1	XM_016598937.1	At2g30780	-	3910-3929	2.5	GO:0003674(molecular_function);GO:0005739(mitochondrion);GO:0008150(biological_process)
cme-miR156a_1ss1TC	XM_016629850.1	XM_016629850.1	SPL3	uncharacterized LOC103401427	1117-1136	1	GO:0003677(DNA binding);GO:0003700(transcription factor activity, sequence-specific DNA binding);GO:0005634(nucleus);GO:0006351(transcription, DNA-templated);GO:0006355(regulation of transcription, DNA-templated);GO:0044212(transcription regulatory region DNA binding);GO:0046872(metal ion binding);GO:0048510(regulation of timing of transition from vegetative to reproductive phase);GO:0048653(anth…	ko04075(Plant hormone signal transduction)
cme-miR156a_1ss1TC	XM_016652329.1	XM_016652329.1	ABCB1	ABC transporter B family member 1	3935-3954	2.5	GO:0016021(integral component of membrane);GO:0042626(ATPase activity, coupled to transmembrane movement of substances);GO:0055085(transmembrane transport)	ko02010(ABC transporters)
cme-miR156a_1ss1TC	XM_016630732.1	XM_016630732.1	SPL7	uncharacterized LOC103401427	884-903	0.5	GO:0003677(DNA binding);GO:0003700(transcription factor activity, sequence-specific DNA binding);GO:0005634(nucleus);GO:0006351(transcription, DNA-templated);GO:0006355(regulation of transcription, DNA-templated);GO:0046872(metal ion binding);GO:0048510(regulation of timing of transition from vegetative to reproductive phase)	ko04075(Plant hormone signal transduction)
cme-miR156a_1ss1TC	XM_016634436.1	XM_016634436.1	SPL17	uncharacterized LOC103401427	927-946	1.5	GO:0003677(DNA binding);GO:0003700(transcription factor activity, sequence-specific DNA binding);GO:0005634(nucleus);GO:0005737(cytoplasm);GO:0006351(transcription, DNA-templated);GO:0006355(regulation of transcription, DNA-templated);GO:0010228(vegetative to reproductive phase transition of meristem);GO:0046872(metal ion binding);GO:0048366(leaf development);GO:0048653(anther development);GO:200…	ko04075(Plant hormone signal transduction)
cme-miR156a_1ss1TC	XM_016653897.1	XM_016653897.1	SPL6	uncharacterized LOC103401427	1748-1767	1.5	GO:0003677(DNA binding);GO:0003700(transcription factor activity, sequence-specific DNA binding);GO:0005634(nucleus);GO:0006351(transcription, DNA-templated);GO:0006355(regulation of transcription, DNA-templated);GO:0010468(regulation of gene expression);GO:0042742(defense response to bacterium);GO:0046872(metal ion binding)	ko04075(Plant hormone signal transduction)
cme-miR156a_1ss1TC	XM_016585575.1	XM_016585575.1	SPL3	uncharacterized LOC103401427	875-894	1.5	GO:0003677(DNA binding);GO:0003700(transcription factor activity, sequence-specific DNA binding);GO:0005634(nucleus);GO:0006351(transcription, DNA-templated);GO:0006355(regulation of transcription, DNA-templated);GO:0044212(transcription regulatory region DNA binding);GO:0046872(metal ion binding);GO:0048510(regulation of timing of transition from vegetative to reproductive phase);GO:0048653(anth…	ko04075(Plant hormone signal transduction)
cme-miR156a_1ss1TC	XM_016601925.1	XM_016601925.1	MFSD12	-	636-654	2.5	GO:0003674(molecular_function);GO:0008150(biological_process);GO:0016021(integral component of membrane)
cme-miR156a_1ss1TC	XM_016601924.1	XM_016601924.1	MFSD12	-	431-449	2.5	GO:0003674(molecular_function);GO:0008150(biological_process);GO:0016021(integral component of membrane)
cme-miR156a_1ss1TC	XM_016601923.1	XM_016601923.1	MFSD12	-	646-664	2.5	GO:0003674(molecular_function);GO:0008150(biological_process);GO:0016021(integral component of membrane)
cme-miR156a_1ss1TC	XM_016601922.1	XM_016601922.1	MFSD12	-	567-585	2.5	GO:0003674(molecular_function);GO:0008150(biological_process);GO:0016021(integral component of membrane)
cme-miR156a_1ss1TC	XM_016655222.1	XM_016655222.1	ABCB1	ABC transporter B family member 1	3959-3978	2.5	GO:0016021(integral component of membrane);GO:0042626(ATPase activity, coupled to transmembrane movement of substances);GO:0055085(transmembrane transport)	ko02010(ABC transporters)
cme-miR156a_1ss1TC	XM_016655245.1	XM_016655245.1	SPL6	-	1673-1692	1.5	GO:0003677(DNA binding);GO:0003700(transcription factor activity, sequence-specific DNA binding);GO:0005634(nucleus);GO:0006351(transcription, DNA-templated);GO:0006355(regulation of transcription, DNA-templated);GO:0010468(regulation of gene expression);GO:0042742(defense response to bacterium);GO:0046872(metal ion binding)
cme-miR156a_1ss1TC	XM_016655244.1	XM_016655244.1	SPL6	-	1364-1383	1.5	GO:0003677(DNA binding);GO:0003700(transcription factor activity, sequence-specific DNA binding);GO:0005634(nucleus);GO:0006351(transcription, DNA-templated);GO:0006355(regulation of transcription, DNA-templated);GO:0010468(regulation of gene expression);GO:0042742(defense response to bacterium);GO:0046872(metal ion binding)
cme-miR156a_1ss1TC	XM_016586762.1	XM_016586762.1	-	LRR receptor-like serine/threonine-protein kinase FLS2	919-937	2.5	GO:0005739(mitochondrion)	ko04626(Plant-pathogen interaction)
cme-miR156a_1ss1TC	XM_016640008.1	XM_016640008.1	SPL6	-	1748-1767	2	GO:0003677(DNA binding);GO:0003700(transcription factor activity, sequence-specific DNA binding);GO:0005634(nucleus);GO:0006351(transcription, DNA-templated);GO:0006355(regulation of transcription, DNA-templated);GO:0010468(regulation of gene expression);GO:0042742(defense response to bacterium);GO:0046872(metal ion binding)
cme-miR156a_1ss1TC	XM_016602811.1	XM_016602811.1	-	-	924-943	1.5	-
cme-miR156a_1ss1TC	XM_016602812.1	XM_016602812.1	-	-	563-582	1.5	-
cme-miR156a_1ss1TC	XM_016602807.1	XM_016602807.1	SPL2	-	1683-1702	1.5	GO:0003677(DNA binding);GO:0003700(transcription factor activity, sequence-specific DNA binding);GO:0005634(nucleus);GO:0006351(transcription, DNA-templated);GO:0006355(regulation of transcription, DNA-templated);GO:0044212(transcription regulatory region DNA binding);GO:0046872(metal ion binding);GO:0048510(regulation of timing of transition from vegetative to reproductive phase);GO:0048653(anth…
cme-miR156a_1ss1TC	XM_016602798.1	XM_016602798.1	SPL2	-	2538-2557	1.5	GO:0003677(DNA binding);GO:0003700(transcription factor activity, sequence-specific DNA binding);GO:0005634(nucleus);GO:0006351(transcription, DNA-templated);GO:0006355(regulation of transcription, DNA-templated);GO:0044212(transcription regulatory region DNA binding);GO:0046872(metal ion binding);GO:0048510(regulation of timing of transition from vegetative to reproductive phase);GO:0048653(anth…
cme-miR156a_1ss1TC	XM_016602810.1	XM_016602810.1	SPL2	-	2481-2500	1.5	GO:0003677(DNA binding);GO:0003700(transcription factor activity, sequence-specific DNA binding);GO:0005634(nucleus);GO:0006351(transcription, DNA-templated);GO:0006355(regulation of transcription, DNA-templated);GO:0044212(transcription regulatory region DNA binding);GO:0046872(metal ion binding);GO:0048510(regulation of timing of transition from vegetative to reproductive phase);GO:0048653(anth…
cme-miR156a_1ss1TC	XM_016602809.1	XM_016602809.1	SPL2	-	1725-1744	1.5	GO:0003677(DNA binding);GO:0003700(transcription factor activity, sequence-specific DNA binding);GO:0005634(nucleus);GO:0006351(transcription, DNA-templated);GO:0006355(regulation of transcription, DNA-templated);GO:0044212(transcription regulatory region DNA binding);GO:0046872(metal ion binding);GO:0048510(regulation of timing of transition from vegetative to reproductive phase);GO:0048653(anth…
cme-miR156a_1ss1TC	XM_016602808.1	XM_016602808.1	SPL2	-	1728-1747	1.5	GO:0003677(DNA binding);GO:0003700(transcription factor activity, sequence-specific DNA binding);GO:0005634(nucleus);GO:0006351(transcription, DNA-templated);GO:0006355(regulation of transcription, DNA-templated);GO:0044212(transcription regulatory region DNA binding);GO:0046872(metal ion binding);GO:0048510(regulation of timing of transition from vegetative to reproductive phase);GO:0048653(anth…
cme-miR156a_1ss1TC	XM_016602802.1	XM_016602802.1	SPL2	-	1812-1831	1.5	GO:0003677(DNA binding);GO:0003700(transcription factor activity, sequence-specific DNA binding);GO:0005634(nucleus);GO:0006351(transcription, DNA-templated);GO:0006355(regulation of transcription, DNA-templated);GO:0044212(transcription regulatory region DNA binding);GO:0046872(metal ion binding);GO:0048510(regulation of timing of transition from vegetative to reproductive phase);GO:0048653(anth…
cme-miR156a_1ss1TC	XM_016602803.1	XM_016602803.1	SPL2	-	1815-1834	1.5	GO:0003677(DNA binding);GO:0003700(transcription factor activity, sequence-specific DNA binding);GO:0005634(nucleus);GO:0006351(transcription, DNA-templated);GO:0006355(regulation of transcription, DNA-templated);GO:0044212(transcription regulatory region DNA binding);GO:0046872(metal ion binding);GO:0048510(regulation of timing of transition from vegetative to reproductive phase);GO:0048653(anth…
cme-miR156a_1ss1TC	XM_016602806.1	XM_016602806.1	SPL2	-	1817-1836	1.5	GO:0003677(DNA binding);GO:0003700(transcription factor activity, sequence-specific DNA binding);GO:0005634(nucleus);GO:0006351(transcription, DNA-templated);GO:0006355(regulation of transcription, DNA-templated);GO:0044212(transcription regulatory region DNA binding);GO:0046872(metal ion binding);GO:0048510(regulation of timing of transition from vegetative to reproductive phase);GO:0048653(anth…
cme-miR156a_1ss1TC	XM_016602801.1	XM_016602801.1	SPL2	-	2539-2558	1.5	GO:0003677(DNA binding);GO:0003700(transcription factor activity, sequence-specific DNA binding);GO:0005634(nucleus);GO:0006351(transcription, DNA-templated);GO:0006355(regulation of transcription, DNA-templated);GO:0044212(transcription regulatory region DNA binding);GO:0046872(metal ion binding);GO:0048510(regulation of timing of transition from vegetative to reproductive phase);GO:0048653(anth…
cme-miR156a_1ss1TC	XM_016602800.1	XM_016602800.1	SPL2	-	2542-2561	1.5	GO:0003677(DNA binding);GO:0003700(transcription factor activity, sequence-specific DNA binding);GO:0005634(nucleus);GO:0006351(transcription, DNA-templated);GO:0006355(regulation of transcription, DNA-templated);GO:0044212(transcription regulatory region DNA binding);GO:0046872(metal ion binding);GO:0048510(regulation of timing of transition from vegetative to reproductive phase);GO:0048653(anth…
cme-miR156a_1ss1TC	XM_016602805.1	XM_016602805.1	SPL2	-	2516-2535	1.5	GO:0003677(DNA binding);GO:0003700(transcription factor activity, sequence-specific DNA binding);GO:0005634(nucleus);GO:0006351(transcription, DNA-templated);GO:0006355(regulation of transcription, DNA-templated);GO:0044212(transcription regulatory region DNA binding);GO:0046872(metal ion binding);GO:0048510(regulation of timing of transition from vegetative to reproductive phase);GO:0048653(anth…
cme-miR156a_1ss1TC	XM_016602799.1	XM_016602799.1	SPL2	-	2585-2604	1.5	GO:0003677(DNA binding);GO:0003700(transcription factor activity, sequence-specific DNA binding);GO:0005634(nucleus);GO:0006351(transcription, DNA-templated);GO:0006355(regulation of transcription, DNA-templated);GO:0044212(transcription regulatory region DNA binding);GO:0046872(metal ion binding);GO:0048510(regulation of timing of transition from vegetative to reproductive phase);GO:0048653(anth…
cme-miR156a_1ss1TC	XM_016640225.1	XM_016640225.1	TKT2	probable 1-deoxy-D-xylulose-5-phosphate synthase	2067-2086	2.5	GO:0005739(mitochondrion);GO:0008661(1-deoxy-D-xylulose-5-phosphate synthase activity);GO:0016114(terpenoid biosynthetic process)	ko00730(Thiamine metabolism);ko00900(Terpenoid backbone biosynthesis)
cme-miR156a_1ss1TC	XM_016603464.1	XM_016603464.1	SBP1	-	925-944	1.5	GO:0003677(DNA binding);GO:0003700(transcription factor activity, sequence-specific DNA binding);GO:0005634(nucleus);GO:0005737(cytoplasm);GO:0006351(transcription, DNA-templated);GO:0006355(regulation of transcription, DNA-templated);GO:0009908(flower development);GO:0010321(regulation of vegetative phase change);GO:0046872(metal ion binding)
cme-miR156a_1ss1TC	XM_016618512.1	XM_016618512.1	-	uncharacterized LOC104808371	630-648	2.5	-	ko00040(Pentose and glucuronate interconversions);ko00052(Galactose metabolism);ko00053(Ascorbate and aldarate metabolism);ko00520(Amino sugar and nucleotide sugar metabolism)
cme-miR156a_1ss1TC	XM_016588078.1	XM_016588078.1	TGA1	-	1259-1278	1.5	GO:0003677(DNA binding);GO:0003700(transcription factor activity, sequence-specific DNA binding);GO:0005634(nucleus);GO:0006351(transcription, DNA-templated);GO:0006355(regulation of transcription, DNA-templated);GO:0046872(metal ion binding);GO:0048653(anther development)
cme-miR156a_1ss1TC	XM_016588079.1	XM_016588079.1	TGA1	-	1262-1281	1.5	GO:0003677(DNA binding);GO:0003700(transcription factor activity, sequence-specific DNA binding);GO:0005634(nucleus);GO:0006351(transcription, DNA-templated);GO:0006355(regulation of transcription, DNA-templated);GO:0046872(metal ion binding);GO:0048653(anther development)
cme-miR156a_1ss1TC	XM_016588082.1	XM_016588082.1	TGA1	-	1914-1933	1.5	GO:0003677(DNA binding);GO:0003700(transcription factor activity, sequence-specific DNA binding);GO:0005634(nucleus);GO:0006351(transcription, DNA-templated);GO:0006355(regulation of transcription, DNA-templated);GO:0046872(metal ion binding);GO:0048653(anther development)
cme-miR156a_1ss1TC	XM_016588077.1	XM_016588077.1	TGA1	-	1962-1981	1.5	GO:0003677(DNA binding);GO:0003700(transcription factor activity, sequence-specific DNA binding);GO:0005634(nucleus);GO:0006351(transcription, DNA-templated);GO:0006355(regulation of transcription, DNA-templated);GO:0046872(metal ion binding);GO:0048653(anther development)
cme-miR156a_1ss1TC	XM_016588080.1	XM_016588080.1	TGA1	-	1064-1083	1.5	GO:0003677(DNA binding);GO:0003700(transcription factor activity, sequence-specific DNA binding);GO:0005634(nucleus);GO:0006351(transcription, DNA-templated);GO:0006355(regulation of transcription, DNA-templated);GO:0046872(metal ion binding);GO:0048653(anther development)
cme-miR156a_1ss1TC	XM_016588081.1	XM_016588081.1	TGA1	-	1067-1086	1.5	GO:0003677(DNA binding);GO:0003700(transcription factor activity, sequence-specific DNA binding);GO:0005634(nucleus);GO:0006351(transcription, DNA-templated);GO:0006355(regulation of transcription, DNA-templated);GO:0046872(metal ion binding);GO:0048653(anther development)
cme-miR156a_1ss1TC	XM_016603926.1	XM_016603926.1	VQ4	-	116-136	2.5	GO:0005515(protein binding);GO:0005634(nucleus);GO:0006952(defense response);GO:0043433(negative regulation of sequence-specific DNA binding transcription factor activity);GO:0051245(negative regulation of cellular defense response)
cme-miR156a_1ss1TC	XM_016634862.1	XM_016634862.1	Os03g0733400	uncharacterized LOC106384454	9-28	2.5	GO:0000977(RNA polymerase II regulatory region sequence-specific DNA binding);GO:0003700(transcription factor activity, sequence-specific DNA binding);GO:0005634(nucleus);GO:0006357(regulation of transcription from RNA polymerase II promoter)	ko01230(Biosynthesis of amino acids);ko00260(Glycine, serine and threonine metabolism)
cme-miR156a_1ss1TC	XM_016589438.1	XM_016589438.1	PP2AB2	serine/threonine protein phosphatase 2A 55 kDa regulatory subunit B beta isoform-like	859-878	2.5	GO:0000159(protein phosphatase type 2A complex);GO:0000166(nucleotide binding);GO:0005737(cytoplasm);GO:0005829(cytosol);GO:0006470(protein dephosphorylation);GO:0008601(protein phosphatase type 2A regulator activity)	ko03015(mRNA surveillance pathway)
cme-miR156a_1ss1TC	XM_016589437.1	XM_016589437.1	PP2AB2	serine/threonine protein phosphatase 2A 55 kDa regulatory subunit B beta isoform-like	860-879	2.5	GO:0000159(protein phosphatase type 2A complex);GO:0000166(nucleotide binding);GO:0005737(cytoplasm);GO:0005829(cytosol);GO:0006470(protein dephosphorylation);GO:0008601(protein phosphatase type 2A regulator activity)	ko03015(mRNA surveillance pathway)
cme-miR156a_1ss1TC	XM_016589439.1	XM_016589439.1	PP2AB2	serine/threonine protein phosphatase 2A 55 kDa regulatory subunit B beta isoform-like	861-880	2.5	GO:0000159(protein phosphatase type 2A complex);GO:0000166(nucleotide binding);GO:0005737(cytoplasm);GO:0005829(cytosol);GO:0006470(protein dephosphorylation);GO:0008601(protein phosphatase type 2A regulator activity)	ko03015(mRNA surveillance pathway)
cme-miR156a_1ss1TC	XM_016642884.1	XM_016642884.1	SPL17	-	1174-1193	1.5	GO:0003677(DNA binding);GO:0003700(transcription factor activity, sequence-specific DNA binding);GO:0005634(nucleus);GO:0005737(cytoplasm);GO:0006351(transcription, DNA-templated);GO:0006355(regulation of transcription, DNA-templated);GO:0010321(regulation of vegetative phase change);GO:0046872(metal ion binding)
cme-miR156a_1ss1TC	XM_016621047.1	XM_016621047.1	SPL7	uncharacterized LOC103401427	849-868	0.5	GO:0003677(DNA binding);GO:0003700(transcription factor activity, sequence-specific DNA binding);GO:0005634(nucleus);GO:0005737(cytoplasm);GO:0006351(transcription, DNA-templated);GO:0006355(regulation of transcription, DNA-templated);GO:0010228(vegetative to reproductive phase transition of meristem);GO:0046872(metal ion binding);GO:0048366(leaf development);GO:0048653(anther development);GO:200…	ko04075(Plant hormone signal transduction)
cme-miR156a_1ss1TC	XM_016621046.1	XM_016621046.1	SPL7	uncharacterized LOC103401427	852-871	0.5	GO:0003677(DNA binding);GO:0003700(transcription factor activity, sequence-specific DNA binding);GO:0005634(nucleus);GO:0005737(cytoplasm);GO:0006351(transcription, DNA-templated);GO:0006355(regulation of transcription, DNA-templated);GO:0010228(vegetative to reproductive phase transition of meristem);GO:0046872(metal ion binding);GO:0048366(leaf development);GO:0048653(anther development);GO:200…	ko04075(Plant hormone signal transduction)
cme-miR156a_1ss1TC	XM_016643476.1	XM_016643476.1	SPL17	-	642-661	1.5	-
cme-miR156a_1ss1TC	XM_016590259.1	XM_016590259.1	SPL6	-	1782-1801	2	GO:0003677(DNA binding);GO:0003700(transcription factor activity, sequence-specific DNA binding);GO:0005634(nucleus);GO:0006351(transcription, DNA-templated);GO:0006355(regulation of transcription, DNA-templated);GO:0010468(regulation of gene expression);GO:0042742(defense response to bacterium);GO:0046872(metal ion binding)
cme-miR156a_1ss1TC	XM_016606427.1	XM_016606427.1	SPL3	-	1440-1459	1.5	GO:0003677(DNA binding);GO:0003700(transcription factor activity, sequence-specific DNA binding);GO:0005634(nucleus);GO:0006351(transcription, DNA-templated);GO:0006355(regulation of transcription, DNA-templated);GO:0044212(transcription regulatory region DNA binding);GO:0046872(metal ion binding);GO:0048510(regulation of timing of transition from vegetative to reproductive phase);GO:0048653(anth…
cme-miR156a_1ss1TC	XM_016606428.1	XM_016606428.1	SPL3	-	1446-1465	1.5	GO:0003677(DNA binding);GO:0003700(transcription factor activity, sequence-specific DNA binding);GO:0005634(nucleus);GO:0006351(transcription, DNA-templated);GO:0006355(regulation of transcription, DNA-templated);GO:0044212(transcription regulatory region DNA binding);GO:0046872(metal ion binding);GO:0048510(regulation of timing of transition from vegetative to reproductive phase);GO:0048653(anth…
cme-miR156a_1ss1TC	XM_016659701.1	XM_016659701.1	SPL13	uncharacterized LOC103401427	609-628	1.5	GO:0003677(DNA binding);GO:0003700(transcription factor activity, sequence-specific DNA binding);GO:0005634(nucleus);GO:0005737(cytoplasm);GO:0006351(transcription, DNA-templated);GO:0006355(regulation of transcription, DNA-templated);GO:0010321(regulation of vegetative phase change);GO:0046872(metal ion binding)	ko04075(Plant hormone signal transduction)
cme-miR156a_1ss1TC	XM_016606866.1	XM_016606866.1	SPL10	uncharacterized LOC103401427	707-726	2	GO:0003677(DNA binding);GO:0005634(nucleus);GO:0005737(cytoplasm);GO:0006351(transcription, DNA-templated);GO:0006355(regulation of transcription, DNA-templated);GO:0009554(megasporogenesis);GO:0009556(microsporogenesis);GO:0030154(cell differentiation);GO:0046872(metal ion binding);GO:0048653(anther development)	ko04075(Plant hormone signal transduction)
cme-miR156a_1ss1TC	XM_016622083.1	XM_016622083.1	KATNAL2	hypothetical protein	184-203	2.5	GO:0005634(nucleus);GO:0008568(microtubule-severing ATPase activity);GO:0031122(cytoplasmic microtubule organization)	ko04144(Endocytosis)
aof-miR168b_L+1_1ss22CT	XM_016626246.1	XM_016626246.1	MSH5	DNA mismatch repair protein MSH3	2083-2103	2.2	GO:0000710(meiotic mismatch repair);GO:0000795(synaptonemal complex);GO:0003684(damaged DNA binding);GO:0006298(mismatch repair);GO:0030983(mismatched DNA binding);GO:0032300(mismatch repair complex);GO:0051026(chiasma assembly)	ko03430(Mismatch repair)
aof-miR168b_L+1_1ss22CT	XM_016626248.1	XM_016626248.1	MSH5	DNA mismatch repair protein MSH3	1667-1687	2.2	GO:0000710(meiotic mismatch repair);GO:0000795(synaptonemal complex);GO:0003684(damaged DNA binding);GO:0006298(mismatch repair);GO:0030983(mismatched DNA binding);GO:0032300(mismatch repair complex);GO:0051026(chiasma assembly)	ko03430(Mismatch repair)
aof-miR168b_L+1_1ss22CT	XM_016626243.1	XM_016626243.1	MSH5	DNA mismatch repair protein MSH3	1927-1947	2.2	GO:0000710(meiotic mismatch repair);GO:0000795(synaptonemal complex);GO:0003684(damaged DNA binding);GO:0006298(mismatch repair);GO:0030983(mismatched DNA binding);GO:0032300(mismatch repair complex);GO:0051026(chiasma assembly)	ko03430(Mismatch repair)
aof-miR168b_L+1_1ss22CT	XM_016626242.1	XM_016626242.1	MSH5	DNA mismatch repair protein MSH3	1973-1993	2.2	GO:0000710(meiotic mismatch repair);GO:0000795(synaptonemal complex);GO:0003684(damaged DNA binding);GO:0006298(mismatch repair);GO:0030983(mismatched DNA binding);GO:0032300(mismatch repair complex);GO:0051026(chiasma assembly)	ko03430(Mismatch repair)
aof-miR168b_L+1_1ss22CT	XM_016626239.1	XM_016626239.1	MSH5	DNA mismatch repair protein MSH3	2280-2300	2.2	GO:0000710(meiotic mismatch repair);GO:0000795(synaptonemal complex);GO:0003684(damaged DNA binding);GO:0006298(mismatch repair);GO:0030983(mismatched DNA binding);GO:0032300(mismatch repair complex);GO:0051026(chiasma assembly)	ko03430(Mismatch repair)
aof-miR168b_L+1_1ss22CT	XM_016626244.1	XM_016626244.1	MSH5	DNA mismatch repair protein MSH3	2198-2218	2.2	GO:0000710(meiotic mismatch repair);GO:0000795(synaptonemal complex);GO:0003684(damaged DNA binding);GO:0006298(mismatch repair);GO:0030983(mismatched DNA binding);GO:0032300(mismatch repair complex);GO:0051026(chiasma assembly)	ko03430(Mismatch repair)
aof-miR168b_L+1_1ss22CT	XM_016626241.1	XM_016626241.1	MSH5	mismatch repair protein	2255-2275	2.2	GO:0000710(meiotic mismatch repair);GO:0000795(synaptonemal complex);GO:0003684(damaged DNA binding);GO:0006298(mismatch repair);GO:0030983(mismatched DNA binding);GO:0032300(mismatch repair complex);GO:0051026(chiasma assembly)	ko03430(Mismatch repair)
aof-miR168b_L+1_1ss22CT	XM_016626237.1	XM_016626237.1	MSH5	DNA mismatch repair protein MSH3	2285-2305	2.2	GO:0000710(meiotic mismatch repair);GO:0000795(synaptonemal complex);GO:0003684(damaged DNA binding);GO:0006298(mismatch repair);GO:0030983(mismatched DNA binding);GO:0032300(mismatch repair complex);GO:0051026(chiasma assembly)	ko03430(Mismatch repair)
aof-miR168b_L+1_1ss22CT	XM_016626247.1	XM_016626247.1	MSH5	DNA mismatch repair protein MSH3	2052-2072	2.2	GO:0000710(meiotic mismatch repair);GO:0000795(synaptonemal complex);GO:0003684(damaged DNA binding);GO:0006298(mismatch repair);GO:0030983(mismatched DNA binding);GO:0032300(mismatch repair complex);GO:0051026(chiasma assembly)	ko03430(Mismatch repair)
aof-miR168b_L+1_1ss22CT	XM_016626245.1	XM_016626245.1	MSH5	DNA mismatch repair protein msh-2	2139-2159	2.2	GO:0000710(meiotic mismatch repair);GO:0000795(synaptonemal complex);GO:0003684(damaged DNA binding);GO:0006298(mismatch repair);GO:0030983(mismatched DNA binding);GO:0032300(mismatch repair complex);GO:0051026(chiasma assembly)	ko03430(Mismatch repair)
aof-miR168b_L+1_1ss22CT	XM_016626240.1	XM_016626240.1	MSH5	DNA mismatch repair protein msh-2	2286-2306	2.2	GO:0000710(meiotic mismatch repair);GO:0000795(synaptonemal complex);GO:0003684(damaged DNA binding);GO:0006298(mismatch repair);GO:0030983(mismatched DNA binding);GO:0032300(mismatch repair complex);GO:0051026(chiasma assembly)	ko03430(Mismatch repair)
aof-miR168b_L+1_1ss22CT	XM_016626252.1	XM_016626252.1	MSH5	DNA mismatch repair protein MSH2	2288-2308	2.2	GO:0000710(meiotic mismatch repair);GO:0000795(synaptonemal complex);GO:0003684(damaged DNA binding);GO:0006298(mismatch repair);GO:0030983(mismatched DNA binding);GO:0032300(mismatch repair complex);GO:0051026(chiasma assembly)	ko03430(Mismatch repair)
aof-miR168b_L+1_1ss22CT	XM_016626250.1	XM_016626250.1	MSH5	mismatch repair protein	2288-2308	2.2	GO:0000710(meiotic mismatch repair);GO:0000795(synaptonemal complex);GO:0003684(damaged DNA binding);GO:0006298(mismatch repair);GO:0030983(mismatched DNA binding);GO:0032300(mismatch repair complex);GO:0051026(chiasma assembly)	ko03430(Mismatch repair)
aof-miR168b_L+1_1ss22CT	XM_016626251.1	XM_016626251.1	MSH5	DNA mismatch repair protein MSH2	2288-2308	2.2	GO:0000710(meiotic mismatch repair);GO:0000795(synaptonemal complex);GO:0003684(damaged DNA binding);GO:0006298(mismatch repair);GO:0030983(mismatched DNA binding);GO:0032300(mismatch repair complex);GO:0051026(chiasma assembly)	ko03430(Mismatch repair)
aof-miR168b_L+1_1ss22CT	XM_016582313.1	XM_016582313.1	MSH5	mismatch repair protein	2402-2422	2.2	GO:0000710(meiotic mismatch repair);GO:0000795(synaptonemal complex);GO:0003684(damaged DNA binding);GO:0006298(mismatch repair);GO:0030983(mismatched DNA binding);GO:0032300(mismatch repair complex);GO:0051026(chiasma assembly)	ko03430(Mismatch repair)
aof-miR168b_L+1_1ss22CT	XM_016582312.1	XM_016582312.1	MSH5	mismatch repair protein	1646-1666	2.2	GO:0000710(meiotic mismatch repair);GO:0000795(synaptonemal complex);GO:0003684(damaged DNA binding);GO:0006298(mismatch repair);GO:0030983(mismatched DNA binding);GO:0032300(mismatch repair complex);GO:0051026(chiasma assembly)	ko03430(Mismatch repair)
aof-miR168b_L+1_1ss22CT	XM_016582316.1	XM_016582316.1	MSH5	mismatch repair protein	1729-1749	2.2	GO:0000710(meiotic mismatch repair);GO:0000795(synaptonemal complex);GO:0003684(damaged DNA binding);GO:0006298(mismatch repair);GO:0030983(mismatched DNA binding);GO:0032300(mismatch repair complex);GO:0051026(chiasma assembly)	ko03430(Mismatch repair)
aof-miR168b_L+1_1ss22CT	XM_016582311.1	XM_016582311.1	MSH5	mismatch repair protein	2022-2042	2.2	GO:0000710(meiotic mismatch repair);GO:0000795(synaptonemal complex);GO:0003684(damaged DNA binding);GO:0006298(mismatch repair);GO:0030983(mismatched DNA binding);GO:0032300(mismatch repair complex);GO:0051026(chiasma assembly)	ko03430(Mismatch repair)
aof-miR168b_L+1_1ss22CT	XM_016582310.1	XM_016582310.1	MSH5	mismatch repair protein	2073-2093	2.2	GO:0000710(meiotic mismatch repair);GO:0000795(synaptonemal complex);GO:0003684(damaged DNA binding);GO:0006298(mismatch repair);GO:0030983(mismatched DNA binding);GO:0032300(mismatch repair complex);GO:0051026(chiasma assembly)	ko03430(Mismatch repair)
aof-miR168b_L+1_1ss22CT	XM_016582314.1	XM_016582314.1	MSH5	mismatch repair protein	2074-2094	2.2	GO:0000710(meiotic mismatch repair);GO:0000795(synaptonemal complex);GO:0003684(damaged DNA binding);GO:0006298(mismatch repair);GO:0030983(mismatched DNA binding);GO:0032300(mismatch repair complex);GO:0051026(chiasma assembly)	ko03430(Mismatch repair)
aof-miR168b_L+1_1ss22CT	XM_016582315.1	XM_016582315.1	MSH5	mismatch repair protein	2074-2094	2.2	GO:0000710(meiotic mismatch repair);GO:0000795(synaptonemal complex);GO:0003684(damaged DNA binding);GO:0006298(mismatch repair);GO:0030983(mismatched DNA binding);GO:0032300(mismatch repair complex);GO:0051026(chiasma assembly)	ko03430(Mismatch repair)
bdi-miR444c	XM_016623088.1	XM_016623088.1	ECA3	plasma-membrane proton-e	742-762	2.2	GO:0005388(calcium-transporting ATPase activity);GO:0005887(integral component of plasma membrane);GO:0006874(cellular calcium ion homeostasis);GO:0043231(intracellular membrane-bounded organelle)	ko00190(Oxidative phosphorylation)
bdi-miR444c	XM_016593148.1	XM_016593148.1	PCMP-H35	pentatricopeptide repeat-containing protein At2g04860	1637-1657	2.5	GO:0003674(molecular_function);GO:0005739(mitochondrion);GO:0008270(zinc ion binding);GO:0009451(RNA modification)	ko00500(Starch and sucrose metabolism)
bdi-miR444c	XM_016648230.1	XM_016648230.1	SDR1	carbonyl reductase [NADPH] 1-like	645-665	2.5	GO:0005737(cytoplasm);GO:0016491(oxidoreductase activity);GO:0055114(oxidation-reduction process)	ko00590(Arachidonic acid metabolism)
bdi-miR444c	XM_016648226.1	XM_016648226.1	SDR1	carbonyl reductase [NADPH] 1-like	690-710	2.5	GO:0005737(cytoplasm);GO:0016491(oxidoreductase activity);GO:0055114(oxidation-reduction process)	ko00590(Arachidonic acid metabolism)
bdi-miR444c	XM_016648236.1	XM_016648236.1	SDR1	carbonyl reductase [NADPH] 1-like	756-776	2.5	GO:0005737(cytoplasm);GO:0016491(oxidoreductase activity);GO:0055114(oxidation-reduction process)	ko00590(Arachidonic acid metabolism)
bdi-miR444c	XM_016624913.1	XM_016624913.1	MIK1	protein BRASSINOSTEROID INSENSITIVE 1-like	2735-2755	2.5	GO:0001944(vasculature development);GO:0004672(protein kinase activity);GO:0004674(protein serine/threonine kinase activity);GO:0005515(protein binding);GO:0005524(ATP binding);GO:0005886(plasma membrane);GO:0006468(protein phosphorylation);GO:0007169(transmembrane receptor protein tyrosine kinase signaling pathway);GO:0010067(procambium histogenesis);GO:0010183(pollen tube guidance);GO:0016021(i…	ko04075(Plant hormone signal transduction)
bdi-miR444c	XM_016624947.1	XM_016624947.1	TTL3	Carboxyl terminus of HSC70-interacting protein	1383-1402	2.5	GO:0005515(protein binding);GO:0005634(nucleus);GO:0006970(response to osmotic stress);GO:0009734(auxin-activated signaling pathway);GO:0009742(brassinosteroid mediated signaling pathway);GO:0010305(leaf vascular tissue pattern formation);GO:0045454(cell redox homeostasis)	ko04141(Protein processing in endoplasmic reticulum);ko04120(Ubiquitin mediated proteolysis)
bdi-miR444c	XM_016654791.1	XM_016654791.1	-	-	2813-2832	2.2	GO:0003674(molecular_function);GO:0005634(nucleus);GO:0008150(biological_process)
bdi-miR444c	XM_016626068.1	XM_016626068.1	ACR4	serine/threonine-protein kinase PBS1-like	1699-1719	2	GO:0004674(protein serine/threonine kinase activity);GO:0005515(protein binding);GO:0005524(ATP binding);GO:0005886(plasma membrane);GO:0006468(protein phosphorylation);GO:0009786(regulation of asymmetric cell division);GO:0009793(embryo development ending in seed dormancy);GO:0009986(cell surface);GO:0010311(lateral root formation);GO:0016021(integral component of membrane);GO:0016301(kinase act…	ko04626(Plant-pathogen interaction)
bdi-miR444c	XM_016595299.1	XM_016595299.1	-	-	1360-1380	2.5	GO:0003674(molecular_function);GO:0005634(nucleus);GO:0008150(biological_process)
bdi-miR444c	XM_016595668.1	XM_016595668.1	At5g64680	-	437-457	2.5	GO:0003674(molecular_function);GO:0005634(nucleus);GO:0005730(nucleolus);GO:0008150(biological_process);GO:0016592(mediator complex)
bdi-miR444c	XM_016584030.1	XM_016584030.1	Eogt	uncharacterized LOC101243695	9-28	2.5	GO:0005576(extracellular region);GO:0016021(integral component of membrane);GO:0016757(transferase activity, transferring glycosyl groups)	ko00514(Other types of O-glycan biosynthesis)
bdi-miR444c	XM_016596261.1	XM_016596261.1	At2g21870	-	339-359	2.5	GO:0005507(copper ion binding);GO:0005730(nucleolus);GO:0005739(mitochondrion);GO:0005753(mitochondrial proton-transporting ATP synthase complex);GO:0008270(zinc ion binding);GO:0009507(chloroplast);GO:0009555(pollen development);GO:0015992(proton transport);GO:0016020(membrane);GO:0045263(proton-transporting ATP synthase complex, coupling factor F);GO:0050897(cobalt ion binding)
bdi-miR444c	XM_016649433.1	XM_016649433.1	GIP	uncharacterized LOC104808371	2672-2691	2.5	GO:0003723(RNA binding);GO:0004525(ribonuclease III activity);GO:0005634(nucleus);GO:0005737(cytoplasm);GO:0016442(RISC complex);GO:0030422(production of siRNA involved in RNA interference)	ko00040(Pentose and glucuronate interconversions);ko00052(Galactose metabolism);ko00053(Ascorbate and aldarate metabolism);ko00520(Amino sugar and nucleotide sugar metabolism)
bdi-miR444c	XM_016649434.1	XM_016649434.1	-	uncharacterized LOC104808371	2894-2913	2.5	GO:0003723(RNA binding);GO:0004525(ribonuclease III activity);GO:0005634(nucleus);GO:0005737(cytoplasm);GO:0016442(RISC complex);GO:0030422(production of siRNA involved in RNA interference)	ko00040(Pentose and glucuronate interconversions);ko00052(Galactose metabolism);ko00053(Ascorbate and aldarate metabolism);ko00520(Amino sugar and nucleotide sugar metabolism)
bdi-miR444c	XM_016649480.1	XM_016649480.1	At2g28370	-	750-770	2.5	GO:0003674(molecular_function);GO:0005886(plasma membrane);GO:0008150(biological_process);GO:0016021(integral component of membrane)
bdi-miR444c	XM_016649515.1	XM_016649515.1	ACR4	serine/threonine-protein kinase PBS1-like	1856-1876	2	GO:0004674(protein serine/threonine kinase activity);GO:0005515(protein binding);GO:0005524(ATP binding);GO:0005886(plasma membrane);GO:0006468(protein phosphorylation);GO:0009786(regulation of asymmetric cell division);GO:0009793(embryo development ending in seed dormancy);GO:0009986(cell surface);GO:0010311(lateral root formation);GO:0016021(integral component of membrane);GO:0016301(kinase act…	ko04626(Plant-pathogen interaction)
bdi-miR444c	XM_016612076.1	XM_016612076.1	LHT1	-	262-282	2.5	GO:0003333(amino acid transmembrane transport);GO:0005886(plasma membrane);GO:0015171(amino acid transmembrane transporter activity)
bdi-miR444c	XM_016649690.1	XM_016649690.1	-	-	110-129	2.5	GO:0003674(molecular_function);GO:0008150(biological_process);GO:0009507(chloroplast)
bdi-miR444c	XM_016610392.1	XM_016610392.1	DRM2	-	81-101	2.5	GO:0003677(DNA binding);GO:0003886(DNA );GO:0005515(protein binding);GO:0005634(nucleus);GO:0005654(nucleoplasm);GO:0006306(DNA methylation);GO:0008170(N-methyltransferase activity);GO:0016458(gene silencing);GO:0050832(defense response to fungus);GO:0051567(histone H3-K9 methylation)
bdi-miR444c	XM_016583249.1	XM_016583249.1	CYP76B6	geraniol 8-hydroxylase-like	1459-1479	2	GO:0016020(membrane);GO:0016709(oxidoreductase activity, acting on paired donors, with incorporation or reduction of molecular oxygen, NAD);GO:0044550(secondary metabolite biosynthetic process)	ko00591(Linoleic acid metabolism);ko00380(Tryptophan metabolism);ko00232(Caffeine metabolism)
bdi-miR444c	XM_016583451.1	XM_016583451.1	CYP76B6	geraniol 8-hydroxylase-like	511-531	2	GO:0016020(membrane);GO:0016709(oxidoreductase activity, acting on paired donors, with incorporation or reduction of molecular oxygen, NAD);GO:0044550(secondary metabolite biosynthetic process)	ko00591(Linoleic acid metabolism);ko00380(Tryptophan metabolism);ko00232(Caffeine metabolism)
bdi-miR444c	XM_016620733.1	XM_016620733.1	ECA3	-	32-52	2.2	GO:0005388(calcium-transporting ATPase activity);GO:0005887(integral component of plasma membrane);GO:0006874(cellular calcium ion homeostasis);GO:0043231(intracellular membrane-bounded organelle)
bdi-miR444c	XM_016620738.1	XM_016620738.1	ECA3	-	32-52	2.2	GO:0005388(calcium-transporting ATPase activity);GO:0005887(integral component of plasma membrane);GO:0006874(cellular calcium ion homeostasis);GO:0043231(intracellular membrane-bounded organelle)
bdi-miR444c	XM_016599721.1	XM_016599721.1	At1g30570	serine/threonine-protein kinase CDL1-like	609-630	2.2	GO:0004674(protein serine/threonine kinase activity);GO:0005524(ATP binding);GO:0005886(plasma membrane);GO:0006468(protein phosphorylation);GO:0009741(response to brassinosteroid);GO:0009826(unidimensional cell growth);GO:0016021(integral component of membrane);GO:0016301(kinase activity)	ko04626(Plant-pathogen interaction)
bdi-miR444c	XM_016599720.1	XM_016599720.1	At1g30570	serine/threonine-protein kinase CDL1-like	621-642	2.2	GO:0004674(protein serine/threonine kinase activity);GO:0005524(ATP binding);GO:0005886(plasma membrane);GO:0006468(protein phosphorylation);GO:0009741(response to brassinosteroid);GO:0009826(unidimensional cell growth);GO:0016021(integral component of membrane);GO:0016301(kinase activity)	ko04626(Plant-pathogen interaction)
bdi-miR444c	XM_016628493.1	XM_016628493.1	OsI_18044	-	2306-2326	2.5	GO:0000059(protein import into nucleus, docking);GO:0000060(protein import into nucleus, translocation);GO:0005737(cytoplasm);GO:0006607(NLS-bearing protein import into nucleus);GO:0006610(ribosomal protein import into nucleus);GO:0008139(nuclear localization sequence binding);GO:0008565(protein transporter activity);GO:0031965(nuclear membrane);GO:0034399(nuclear periphery)
bdi-miR444c	XM_016653489.1	XM_016653489.1	COX6B-1	cytochrome c oxidase subunit 6b-1	463-483	2.5	GO:0004129(cytochrome-c oxidase activity);GO:0005507(copper ion binding);GO:0005739(mitochondrion);GO:0009507(chloroplast);GO:0009535(chloroplast thylakoid membrane);GO:0009579(thylakoid);GO:0009651(response to salt stress);GO:0055114(oxidation-reduction process)	ko00190(Oxidative phosphorylation)
bdi-miR444c	XM_016631429.1	XM_016631429.1	SLK2	peroxisomal (S)-2-hydroxy-acid oxidase GLO5-like	801-820	2.5	GO:0005515(protein binding);GO:0005634(nucleus);GO:0006351(transcription, DNA-templated);GO:0006355(regulation of transcription, DNA-templated);GO:0009793(embryo development ending in seed dormancy);GO:0030154(cell differentiation);GO:0047484(regulation of response to osmotic stress);GO:0048467(gynoecium development);GO:0048481(plant ovule development);GO:1901001(negative regulation of response t…	ko01200(Carbon metabolism);ko00630(Glyoxylate and dicarboxylate metabolism);ko04146(Peroxisome)
bdi-miR444c	XM_016631428.1	XM_016631428.1	SLK2	peroxisomal (S)-2-hydroxy-acid oxidase GLO5-like	834-853	2.5	GO:0005515(protein binding);GO:0005634(nucleus);GO:0006351(transcription, DNA-templated);GO:0006355(regulation of transcription, DNA-templated);GO:0009793(embryo development ending in seed dormancy);GO:0030154(cell differentiation);GO:0047484(regulation of response to osmotic stress);GO:0048467(gynoecium development);GO:0048481(plant ovule development);GO:1901001(negative regulation of response t…	ko01200(Carbon metabolism);ko00630(Glyoxylate and dicarboxylate metabolism);ko04146(Peroxisome)
bdi-miR444c	XM_016631423.1	XM_016631423.1	SLK2	peroxisomal (S)-2-hydroxy-acid oxidase GLO5-like	834-853	2.5	GO:0005515(protein binding);GO:0005634(nucleus);GO:0006351(transcription, DNA-templated);GO:0006355(regulation of transcription, DNA-templated);GO:0009793(embryo development ending in seed dormancy);GO:0030154(cell differentiation);GO:0047484(regulation of response to osmotic stress);GO:0048467(gynoecium development);GO:0048481(plant ovule development);GO:1901001(negative regulation of response t…	ko01200(Carbon metabolism);ko00630(Glyoxylate and dicarboxylate metabolism);ko04146(Peroxisome)
bdi-miR444c	XM_016631424.1	XM_016631424.1	SLK2	peroxisomal (S)-2-hydroxy-acid oxidase GLO5-like	834-853	2.5	GO:0005515(protein binding);GO:0005634(nucleus);GO:0006351(transcription, DNA-templated);GO:0006355(regulation of transcription, DNA-templated);GO:0009793(embryo development ending in seed dormancy);GO:0030154(cell differentiation);GO:0047484(regulation of response to osmotic stress);GO:0048467(gynoecium development);GO:0048481(plant ovule development);GO:1901001(negative regulation of response t…	ko01200(Carbon metabolism);ko00630(Glyoxylate and dicarboxylate metabolism);ko04146(Peroxisome)
bdi-miR444c	XM_016631425.1	XM_016631425.1	SLK2	peroxisomal (S)-2-hydroxy-acid oxidase GLO5-like	834-853	2.5	GO:0005515(protein binding);GO:0005634(nucleus);GO:0006351(transcription, DNA-templated);GO:0006355(regulation of transcription, DNA-templated);GO:0009793(embryo development ending in seed dormancy);GO:0030154(cell differentiation);GO:0047484(regulation of response to osmotic stress);GO:0048467(gynoecium development);GO:0048481(plant ovule development);GO:1901001(negative regulation of response t…	ko01200(Carbon metabolism);ko00630(Glyoxylate and dicarboxylate metabolism);ko04146(Peroxisome)
bdi-miR444c	XM_016631422.1	XM_016631422.1	SLK2	peroxisomal (S)-2-hydroxy-acid oxidase GLO5-like	833-852	2.5	GO:0005515(protein binding);GO:0005634(nucleus);GO:0006351(transcription, DNA-templated);GO:0006355(regulation of transcription, DNA-templated);GO:0009793(embryo development ending in seed dormancy);GO:0030154(cell differentiation);GO:0047484(regulation of response to osmotic stress);GO:0048467(gynoecium development);GO:0048481(plant ovule development);GO:1901001(negative regulation of response t…	ko01200(Carbon metabolism);ko00630(Glyoxylate and dicarboxylate metabolism);ko04146(Peroxisome)
bdi-miR444c	XM_016631426.1	XM_016631426.1	SLK2	peroxisomal (S)-2-hydroxy-acid oxidase GLO5-like	920-939	2.5	GO:0005515(protein binding);GO:0005634(nucleus);GO:0006351(transcription, DNA-templated);GO:0006355(regulation of transcription, DNA-templated);GO:0009793(embryo development ending in seed dormancy);GO:0030154(cell differentiation);GO:0047484(regulation of response to osmotic stress);GO:0048467(gynoecium development);GO:0048481(plant ovule development);GO:1901001(negative regulation of response t…	ko01200(Carbon metabolism);ko00630(Glyoxylate and dicarboxylate metabolism);ko04146(Peroxisome)
bdi-miR444c	XM_016631427.1	XM_016631427.1	SLK2	peroxisomal (S)-2-hydroxy-acid oxidase GLO5-like	949-968	2.5	GO:0005515(protein binding);GO:0005634(nucleus);GO:0006351(transcription, DNA-templated);GO:0006355(regulation of transcription, DNA-templated);GO:0009793(embryo development ending in seed dormancy);GO:0030154(cell differentiation);GO:0047484(regulation of response to osmotic stress);GO:0048467(gynoecium development);GO:0048481(plant ovule development);GO:1901001(negative regulation of response t…	ko01200(Carbon metabolism);ko00630(Glyoxylate and dicarboxylate metabolism);ko04146(Peroxisome)
bdi-miR444c	XM_016631580.1	XM_016631580.1	At2g21870	-	282-302	2.5	GO:0005507(copper ion binding);GO:0005730(nucleolus);GO:0005739(mitochondrion);GO:0005753(mitochondrial proton-transporting ATP synthase complex);GO:0008270(zinc ion binding);GO:0009507(chloroplast);GO:0009555(pollen development);GO:0015992(proton transport);GO:0016020(membrane);GO:0045263(proton-transporting ATP synthase complex, coupling factor F);GO:0050897(cobalt ion binding)
bdi-miR444c	XM_016600963.1	XM_016600963.1	AGL21	mitochondrial inner membrane protein OXA1-like	465-485	0.8	GO:0003677(DNA binding);GO:0003700(transcription factor activity, sequence-specific DNA binding);GO:0005515(protein binding);GO:0005634(nucleus);GO:0006351(transcription, DNA-templated);GO:0006355(regulation of transcription, DNA-templated);GO:0008134(transcription factor binding);GO:0046983(protein dimerization activity)	ko03060(Protein export)
bdi-miR444c	XM_016616362.1	XM_016616362.1	SDR1	carbonyl reductase [NADPH] 1-like	678-697	1.5	GO:0005737(cytoplasm);GO:0016491(oxidoreductase activity);GO:0055114(oxidation-reduction process)	ko00590(Arachidonic acid metabolism)
bdi-miR444c	XM_016617787.1	XM_016617787.1	COX6B-1	cytochrome c oxidase subunit 6b-1-like	863-883	2.5	GO:0004129(cytochrome-c oxidase activity);GO:0005507(copper ion binding);GO:0005739(mitochondrion);GO:0009507(chloroplast);GO:0009535(chloroplast thylakoid membrane);GO:0009579(thylakoid);GO:0009651(response to salt stress);GO:0055114(oxidation-reduction process)	ko00190(Oxidative phosphorylation)
bdi-miR444c	XM_016617786.1	XM_016617786.1	COX6B-1	cytochrome c oxidase subunit 6b-1-like	514-534	2.5	GO:0004129(cytochrome-c oxidase activity);GO:0005507(copper ion binding);GO:0005739(mitochondrion);GO:0009507(chloroplast);GO:0009535(chloroplast thylakoid membrane);GO:0009579(thylakoid);GO:0009651(response to salt stress);GO:0055114(oxidation-reduction process)	ko00190(Oxidative phosphorylation)
bdi-miR444c	XM_016655723.1	XM_016655723.1	MIK1	protein BRASSINOSTEROID INSENSITIVE 1-like	2797-2817	2.5	GO:0001944(vasculature development);GO:0004672(protein kinase activity);GO:0004674(protein serine/threonine kinase activity);GO:0005515(protein binding);GO:0005524(ATP binding);GO:0005886(plasma membrane);GO:0006468(protein phosphorylation);GO:0007169(transmembrane receptor protein tyrosine kinase signaling pathway);GO:0010067(procambium histogenesis);GO:0010183(pollen tube guidance);GO:0016021(i…	ko04075(Plant hormone signal transduction)
bdi-miR444c	XM_016618161.1	XM_016618161.1	-	-	254-273	2.5	GO:0005483(soluble NSF attachment protein activity);GO:0005774(vacuolar membrane);GO:0006886(intracellular protein transport);GO:0019905(syntaxin binding);GO:0031201(SNARE complex);GO:0035494(SNARE complex disassembly);GO:0061025(membrane fusion)
bdi-miR444c	XM_016587539.1	XM_016587539.1	-	-	65-84	2.5	-
bdi-miR444c	XM_016641047.1	XM_016641047.1	At1g30570	serine/threonine-protein kinase CDL1-like	624-644	2.5	GO:0004674(protein serine/threonine kinase activity);GO:0005524(ATP binding);GO:0005886(plasma membrane);GO:0006468(protein phosphorylation);GO:0009741(response to brassinosteroid);GO:0009826(unidimensional cell growth);GO:0016021(integral component of membrane);GO:0016301(kinase activity)	ko04626(Plant-pathogen interaction)
bdi-miR444c	XM_016641048.1	XM_016641048.1	At1g30570	serine/threonine-protein kinase CDL1-like	514-534	2.5	GO:0004674(protein serine/threonine kinase activity);GO:0005524(ATP binding);GO:0005886(plasma membrane);GO:0006468(protein phosphorylation);GO:0009741(response to brassinosteroid);GO:0009826(unidimensional cell growth);GO:0016021(integral component of membrane);GO:0016301(kinase activity)	ko04626(Plant-pathogen interaction)
bdi-miR444c	XM_016587840.1	XM_016587840.1	MADS27	mitochondrial inner membrane protein OXA1-like	443-463	2.5	GO:0003677(DNA binding);GO:0003700(transcription factor activity, sequence-specific DNA binding);GO:0005515(protein binding);GO:0005634(nucleus);GO:0006351(transcription, DNA-templated);GO:0006355(regulation of transcription, DNA-templated);GO:0008134(transcription factor binding);GO:0046983(protein dimerization activity)	ko03060(Protein export)
bdi-miR444c	XM_016587841.1	XM_016587841.1	MADS27	mitochondrial inner membrane protein OXA1-like	499-519	2.5	GO:0003677(DNA binding);GO:0003700(transcription factor activity, sequence-specific DNA binding);GO:0005515(protein binding);GO:0005634(nucleus);GO:0006351(transcription, DNA-templated);GO:0006355(regulation of transcription, DNA-templated);GO:0008134(transcription factor binding);GO:0046983(protein dimerization activity)	ko03060(Protein export)
bdi-miR444c	XM_016587839.1	XM_016587839.1	MADS27	mitochondrial inner membrane protein OXA1-like	496-516	2.5	GO:0003677(DNA binding);GO:0003700(transcription factor activity, sequence-specific DNA binding);GO:0005515(protein binding);GO:0005634(nucleus);GO:0006351(transcription, DNA-templated);GO:0006355(regulation of transcription, DNA-templated);GO:0008134(transcription factor binding);GO:0046983(protein dimerization activity)	ko03060(Protein export)
bdi-miR444c	XM_016587842.1	XM_016587842.1	MADS27	-	171-191	2.5	GO:0003677(DNA binding);GO:0003700(transcription factor activity, sequence-specific DNA binding);GO:0005515(protein binding);GO:0005634(nucleus);GO:0006351(transcription, DNA-templated);GO:0009908(flower development);GO:0009933(meristem structural organization);GO:0010076(maintenance of floral meristem identity);GO:0010582(floral meristem determinacy);GO:0030154(cell differentiation);GO:0045893(p…
bdi-miR444c	XM_016635910.1	XM_016635910.1	UBP14	cathepsin L1-like	887-907	2	GO:0004843(thiol-dependent ubiquitin-specific protease activity);GO:0005829(cytosol);GO:0006511(ubiquitin-dependent protein catabolic process);GO:0008242(omega peptidase activity);GO:0008270(zinc ion binding);GO:0009793(embryo development ending in seed dormancy);GO:0016579(protein deubiquitination);GO:0048767(root hair elongation)	ko04145(Phagosome)
bdi-miR444c	XM_016635911.1	XM_016635911.1	UBP14	cathepsin L1-like	887-907	2	GO:0004843(thiol-dependent ubiquitin-specific protease activity);GO:0005829(cytosol);GO:0006511(ubiquitin-dependent protein catabolic process);GO:0008242(omega peptidase activity);GO:0008270(zinc ion binding);GO:0009793(embryo development ending in seed dormancy);GO:0016579(protein deubiquitination);GO:0048767(root hair elongation)	ko04145(Phagosome)
bdi-miR444c	XM_016621258.1	XM_016621258.1	UBP14	cathepsin L1-like	934-954	1.5	GO:0004843(thiol-dependent ubiquitin-specific protease activity);GO:0005829(cytosol);GO:0006511(ubiquitin-dependent protein catabolic process);GO:0008242(omega peptidase activity);GO:0008270(zinc ion binding);GO:0009793(embryo development ending in seed dormancy);GO:0016579(protein deubiquitination);GO:0048767(root hair elongation)	ko04145(Phagosome)
bdi-miR444c	XM_016621257.1	XM_016621257.1	UBP14	cathepsin L1-like	934-954	1.5	GO:0004843(thiol-dependent ubiquitin-specific protease activity);GO:0005829(cytosol);GO:0006511(ubiquitin-dependent protein catabolic process);GO:0008242(omega peptidase activity);GO:0008270(zinc ion binding);GO:0009793(embryo development ending in seed dormancy);GO:0016579(protein deubiquitination);GO:0048767(root hair elongation)	ko04145(Phagosome)
bdi-miR444c	XM_016621584.1	XM_016621584.1	MADS57	mitochondrial inner membrane protein OXA1-like	463-483	1.8	GO:0003677(DNA binding);GO:0003700(transcription factor activity, sequence-specific DNA binding);GO:0005515(protein binding);GO:0005634(nucleus);GO:0006351(transcription, DNA-templated);GO:0006355(regulation of transcription, DNA-templated);GO:0008134(transcription factor binding);GO:0046983(protein dimerization activity)	ko03060(Protein export)
bdi-miR444c	XM_016621582.1	XM_016621582.1	AGL21	mitochondrial inner membrane protein OXA1-like	462-482	1.8	GO:0003677(DNA binding);GO:0003700(transcription factor activity, sequence-specific DNA binding);GO:0005515(protein binding);GO:0005634(nucleus);GO:0006351(transcription, DNA-templated);GO:0006355(regulation of transcription, DNA-templated);GO:0008134(transcription factor binding);GO:0046983(protein dimerization activity)	ko03060(Protein export)
bdi-miR444c	XM_016621583.1	XM_016621583.1	AGL21	mitochondrial inner membrane protein OXA1-like	501-521	1.8	GO:0003677(DNA binding);GO:0003700(transcription factor activity, sequence-specific DNA binding);GO:0005515(protein binding);GO:0005634(nucleus);GO:0006351(transcription, DNA-templated);GO:0006355(regulation of transcription, DNA-templated);GO:0008134(transcription factor binding);GO:0046983(protein dimerization activity)	ko03060(Protein export)
bdi-miR444c	XM_016644278.1	XM_016644278.1	-	-	533-552	2.5	GO:0005483(soluble NSF attachment protein activity);GO:0005774(vacuolar membrane);GO:0006886(intracellular protein transport);GO:0019905(syntaxin binding);GO:0031201(SNARE complex);GO:0035494(SNARE complex disassembly);GO:0061025(membrane fusion)
bdi-miR444c	XM_016644277.1	XM_016644277.1	-	-	532-551	2.5	GO:0005483(soluble NSF attachment protein activity);GO:0005774(vacuolar membrane);GO:0006886(intracellular protein transport);GO:0019905(syntaxin binding);GO:0031201(SNARE complex);GO:0035494(SNARE complex disassembly);GO:0061025(membrane fusion)
sly-miR482a_L+3	XM_016594692.1	XM_016594692.1	-	HSPA4 nucleotide-binding domain protein	784-807	2.2	GO:0005737(cytoplasm);GO:0006952(defense response);GO:0007165(signal transduction);GO:0016021(integral component of membrane);GO:0043531(ADP binding)	ko03040(Spliceosome);ko04141(Protein processing in endoplasmic reticulum);ko04144(Endocytosis)
sly-miR482a_L+3	XM_016616596.1	XM_016616596.1	-	HSPA4 nucleotide-binding domain protein	901-924	2	GO:0005737(cytoplasm);GO:0006952(defense response);GO:0007165(signal transduction);GO:0016021(integral component of membrane);GO:0043531(ADP binding)	ko03040(Spliceosome);ko04141(Protein processing in endoplasmic reticulum);ko04144(Endocytosis)
sly-miR482a_L+3	XM_016632693.1	XM_016632693.1	-	HSPA4 nucleotide-binding domain protein	811-836	2.5	GO:0005737(cytoplasm);GO:0006952(defense response);GO:0007165(signal transduction);GO:0016021(integral component of membrane);GO:0043531(ADP binding)	ko03040(Spliceosome);ko04141(Protein processing in endoplasmic reticulum);ko04144(Endocytosis)
ata-miR528-5p	XM_016644872.1	XM_016644872.1	At1g52360	U3 small nucleolar RNA-associated protein	2444-2464	2.5	GO:0006886(intracellular protein transport);GO:0006888(ER to Golgi vesicle-mediated transport);GO:0006890(retrograde vesicle-mediated transport, Golgi to ER);GO:0006891(intra-Golgi vesicle-mediated transport);GO:0030126(COPI vesicle coat)	ko03008(Ribosome biogenesis in eukaryotes)
ata-miR528-5p	XM_016650766.1	XM_016650766.1	VIN3	-	133-153	2.5	GO:0001666(response to hypoxia);GO:0003677(DNA binding);GO:0005515(protein binding);GO:0005634(nucleus);GO:0005677(chromatin silencing complex);GO:0006351(transcription, DNA-templated);GO:0006355(regulation of transcription, DNA-templated);GO:0009409(response to cold);GO:0010048(vernalization response);GO:0016607(nuclear speck);GO:0045814(negative regulation of gene expression, epigenetic);GO:004…
ata-miR528-5p	XM_016598267.1	XM_016598267.1	At5g06060	tropinone reductase homolog At5g06060-like	1057-1076	2.2	GO:0005829(cytosol);GO:0016491(oxidoreductase activity);GO:0055114(oxidation-reduction process)	ko00960(Tropane, piperidine and pyridine alkaloid biosynthesis)
ata-miR528-5p	XM_016586593.1	XM_016586593.1	At5g06060	tropinone reductase homolog At5g06060-like	1027-1046	2.2	GO:0005829(cytosol);GO:0016491(oxidoreductase activity);GO:0055114(oxidation-reduction process)	ko00960(Tropane, piperidine and pyridine alkaloid biosynthesis)
ata-miR528-5p	XM_016634444.1	XM_016634444.1	R1A-10	putative late blight resistance protein homolog R1A-10	1821-1840	2.5	GO:0005524(ATP binding);GO:0005575(cellular_component);GO:0006952(defense response);GO:0043531(ADP binding)	ko04626(Plant-pathogen interaction)
ata-miR528-5p	XM_016634442.1	XM_016634442.1	R1A-10	putative late blight resistance protein homolog R1A-10	3424-3443	2.5	GO:0005524(ATP binding);GO:0005575(cellular_component);GO:0006952(defense response);GO:0043531(ADP binding)	ko04626(Plant-pathogen interaction)
ata-miR528-5p	XM_016634438.1	XM_016634438.1	R1A-10	putative late blight resistance protein homolog R1A-10	3414-3433	2.5	GO:0005524(ATP binding);GO:0005575(cellular_component);GO:0006952(defense response);GO:0043531(ADP binding)	ko04626(Plant-pathogen interaction)
ata-miR528-5p	XM_016634441.1	XM_016634441.1	R1A-10	putative late blight resistance protein homolog R1A-10	2592-2611	2.5	GO:0005524(ATP binding);GO:0005575(cellular_component);GO:0006952(defense response);GO:0043531(ADP binding)	ko04626(Plant-pathogen interaction)
ata-miR528-5p	XM_016634440.1	XM_016634440.1	R1A-10	putative late blight resistance protein homolog R1A-10	2727-2746	2.5	GO:0005524(ATP binding);GO:0005575(cellular_component);GO:0006952(defense response);GO:0043531(ADP binding)	ko04626(Plant-pathogen interaction)
ata-miR528-5p	XM_016634439.1	XM_016634439.1	R1A-10	putative late blight resistance protein homolog R1A-10	2791-2810	2.5	GO:0005524(ATP binding);GO:0005575(cellular_component);GO:0006952(defense response);GO:0043531(ADP binding)	ko04626(Plant-pathogen interaction)
ata-miR528-5p	XM_016634437.1	XM_016634437.1	R1A-10	putative late blight resistance protein homolog R1A-10	3288-3307	2.5	GO:0005524(ATP binding);GO:0005575(cellular_component);GO:0006952(defense response);GO:0043531(ADP binding)	ko04626(Plant-pathogen interaction)
ata-miR528-5p	XM_016634435.1	XM_016634435.1	R1A-10	putative late blight resistance protein homolog R1A-10	3426-3445	2.5	GO:0005524(ATP binding);GO:0005575(cellular_component);GO:0006952(defense response);GO:0043531(ADP binding)	ko04626(Plant-pathogen interaction)
ata-miR528-5p	XM_016634443.1	XM_016634443.1	R1A-10	putative late blight resistance protein homolog R1A-10	3322-3341	2.5	GO:0005524(ATP binding);GO:0005575(cellular_component);GO:0006952(defense response);GO:0043531(ADP binding)	ko04626(Plant-pathogen interaction)
ata-miR528-5p	XM_016634445.1	XM_016634445.1	R1A-10	putative late blight resistance protein homolog R1A-10	2670-2689	2.5	GO:0005524(ATP binding);GO:0005575(cellular_component);GO:0006952(defense response);GO:0043531(ADP binding)	ko04626(Plant-pathogen interaction)
ata-miR528-5p	XM_016590788.1	XM_016590788.1	At1g52360	U3 small nucleolar RNA-associated protein	2464-2484	2.5	GO:0006886(intracellular protein transport);GO:0006888(ER to Golgi vesicle-mediated transport);GO:0006890(retrograde vesicle-mediated transport, Golgi to ER);GO:0006891(intra-Golgi vesicle-mediated transport);GO:0030126(COPI vesicle coat)	ko03008(Ribosome biogenesis in eukaryotes)
ata-miR528-5p	XM_016590789.1	XM_016590789.1	At1g52360	U3 small nucleolar RNA-associated protein	2464-2484	2.5	GO:0006886(intracellular protein transport);GO:0006888(ER to Golgi vesicle-mediated transport);GO:0006890(retrograde vesicle-mediated transport, Golgi to ER);GO:0006891(intra-Golgi vesicle-mediated transport);GO:0030126(COPI vesicle coat)	ko03008(Ribosome biogenesis in eukaryotes)
mdm-miR1511	XM_016610228.1	XM_016610228.1	At1g27930	-	571-590	2.5	GO:0000139(Golgi membrane);GO:0005515(protein binding);GO:0005768(endosome);GO:0005794(Golgi apparatus);GO:0005802(trans-Golgi network);GO:0008168(methyltransferase activity);GO:0016021(integral component of membrane);GO:0032259(methylation);GO:0045492(xylan biosynthetic process)
mdm-miR1511	XM_016649301.1	XM_016649301.1	-	-	263-282	2.5	GO:0004857(enzyme inhibitor activity)
mdm-miR1511	XM_016649904.1	XM_016649904.1	-	-	317-337	2.2	-
mdm-miR1511	XM_016629825.1	XM_016629825.1	-	-	133-154	2.5	-
mdm-miR1511	XM_016615922.1	XM_016615922.1	AtMg00810	LRR receptor-like serine/threonine-protein kinase FLS2	124-145	2.5	GO:0004596(peptide alpha-N-acetyltransferase activity);GO:0005737(cytoplasm);GO:0017196(N-terminal peptidyl-methionine acetylation)	ko04626(Plant-pathogen interaction)
mdm-miR1511	XM_016654248.1	XM_016654248.1	At1g27930	-	545-564	2.5	GO:0000139(Golgi membrane);GO:0005515(protein binding);GO:0005768(endosome);GO:0005794(Golgi apparatus);GO:0005802(trans-Golgi network);GO:0008168(methyltransferase activity);GO:0016021(integral component of membrane);GO:0032259(methylation);GO:0045492(xylan biosynthetic process)
mdm-miR1511	XM_016654921.1	XM_016654921.1	-	uncharacterized LOC105173773	1618-1638	2.5	GO:0003674(molecular_function);GO:0005634(nucleus);GO:0008150(biological_process)	ko01200(Carbon metabolism);ko00630(Glyoxylate and dicarboxylate metabolism);ko00710(Carbon fixation in photosynthetic organisms)
mdm-miR1511	XM_016633735.1	XM_016633735.1	PDAT1	phospholipid:diacylglycerol acyltransferase 1-like	669-689	2.5	GO:0004607(phosphatidylcholine-sterol O-acyltransferase activity);GO:0005634(nucleus);GO:0005773(vacuole);GO:0005783(endoplasmic reticulum);GO:0006071(glycerol metabolic process);GO:0006629(lipid metabolic process);GO:0008374(O-acyltransferase activity);GO:0016021(integral component of membrane);GO:0019432(triglyceride biosynthetic process);GO:0046027(phospholipid:diacylglycerol acyltransferase a…	ko00561(Glycerolipid metabolism)
mdm-miR1511	XM_016603739.1	XM_016603739.1	PDAT1	phospholipid:diacylglycerol acyltransferase 1-like	485-505	2.5	GO:0004607(phosphatidylcholine-sterol O-acyltransferase activity);GO:0005634(nucleus);GO:0005773(vacuole);GO:0005783(endoplasmic reticulum);GO:0006071(glycerol metabolic process);GO:0006629(lipid metabolic process);GO:0008374(O-acyltransferase activity);GO:0016021(integral component of membrane);GO:0019432(triglyceride biosynthetic process);GO:0046027(phospholipid:diacylglycerol acyltransferase a…	ko00561(Glycerolipid metabolism)
mdm-miR1511	XM_016635796.1	XM_016635796.1	-	-	47-67	2.5	GO:0003674(molecular_function);GO:0005634(nucleus);GO:0008150(biological_process)
mdm-miR1511	XM_016605975.1	XM_016605975.1	-	-	1093-1113	2.5	GO:0003674(molecular_function);GO:0005634(nucleus);GO:0008150(biological_process)
mdm-miR1511	XM_016605976.1	XM_016605976.1	-	-	1088-1108	2.5	GO:0003674(molecular_function);GO:0005634(nucleus);GO:0008150(biological_process)
mdm-miR1511	XM_016659487.1	XM_016659487.1	-	methylthioribose kinase-like	266-285	2.5	GO:0004857(enzyme inhibitor activity)	ko00270(Cysteine and methionine metabolism)
mtr-miR2111a-5p_R+1_1ss21AT	XM_016645071.1	XM_016645071.1	-	-	1693-1714	2.2	GO:0003674(molecular_function);GO:0005634(nucleus);GO:0008150(biological_process)
mtr-miR2111a-5p_R+1_1ss21AT	XM_016645072.1	XM_016645072.1	-	-	1601-1622	2.2	GO:0003674(molecular_function);GO:0005634(nucleus);GO:0008150(biological_process)
mtr-miR2111a-5p_R+1_1ss21AT	XM_016604141.1	XM_016604141.1	At3g27150	-	402-423	0.5	GO:0004842(ubiquitin-protein transferase activity);GO:0031463(Cul3-RING ubiquitin ligase complex)
mtr-miR2111a-5p_R+1_1ss21AT	XM_016623583.1	XM_016623583.1	surE2	uncharacterized LOC101263094	1165-1186	2.5	GO:0003993(acid phosphatase activity);GO:0005737(cytoplasm);GO:0008252(nucleotidase activity)	ko00230(Purine metabolism);ko00240(Pyrimidine metabolism);ko00760(Nicotinate and nicotinamide metabolism)
mtr-miR2111a-5p_R+1_1ss21AT	XM_016599965.1	XM_016599965.1	-	-	1658-1679	2.2	GO:0003674(molecular_function);GO:0005634(nucleus);GO:0008150(biological_process)
mtr-miR2111a-5p_R+1_1ss21AT	XM_016659391.1	XM_016659391.1	Stk24	hypothetical protein	488-509	2.5	GO:0004702(receptor signaling protein serine/threonine kinase activity);GO:0005737(cytoplasm)	ko04626(Plant-pathogen interaction)
mtr-miR2111a-5p_R+1_1ss21AT	XM_016659392.1	XM_016659392.1	Stk24	hypothetical protein	488-509	2.5	GO:0004702(receptor signaling protein serine/threonine kinase activity);GO:0005737(cytoplasm)	ko04626(Plant-pathogen interaction)
mtr-miR2111a-5p_R+1_1ss21AT	XM_016659393.1	XM_016659393.1	Stk24	hypothetical protein	29-50	2.5	GO:0004702(receptor signaling protein serine/threonine kinase activity);GO:0005737(cytoplasm)	ko04626(Plant-pathogen interaction)
mtr-miR2111a-5p_R+1_1ss21AT	XM_016659697.1	XM_016659697.1	Stk24	hypothetical protein	437-458	2.5	GO:0004702(receptor signaling protein serine/threonine kinase activity);GO:0005737(cytoplasm)	ko04626(Plant-pathogen interaction)
mtr-miR2111a-5p_R+1_1ss21AT	XM_016660163.1	XM_016660163.1	At3g27150	-	407-428	0.5	GO:0004842(ubiquitin-protein transferase activity);GO:0031463(Cul3-RING ubiquitin ligase complex)
osa-miR2118o_1ss1CT	XM_016595046.1	XM_016595046.1	At3g26560	probable pre-mRNA-splicing factor ATP-dependent RNA helicase	863-885	2.2	GO:0000398(mRNA splicing, via spliceosome);GO:0004004(ATP-dependent RNA helicase activity);GO:0005681(spliceosomal complex);GO:0005737(cytoplasm);GO:0044822(poly)	ko03040(Spliceosome)
osa-miR2118o_1ss1CT	XM_016612076.1	XM_016612076.1	LHT1	-	839-859	2.5	GO:0003333(amino acid transmembrane transport);GO:0005886(plasma membrane);GO:0015171(amino acid transmembrane transporter activity)
osa-miR2118o_1ss1CT	XM_016613961.1	XM_016613961.1	-	HSPA4 nucleotide-binding domain protein	2541-2562	2.5	GO:0005515(protein binding)	ko03040(Spliceosome);ko04141(Protein processing in endoplasmic reticulum);ko04144(Endocytosis)
osa-miR2118o_1ss1CT	XM_016656888.1	XM_016656888.1	At3g26560	probable pre-mRNA-splicing factor ATP-dependent RNA helicase DEAH5	875-897	2.2	GO:0000398(mRNA splicing, via spliceosome);GO:0004004(ATP-dependent RNA helicase activity);GO:0005681(spliceosomal complex);GO:0005737(cytoplasm);GO:0044822(poly)	ko03040(Spliceosome)
osa-miR2118o_1ss1CT	XM_016659303.1	XM_016659303.1	LHT1	-	853-873	2.5	GO:0003333(amino acid transmembrane transport);GO:0005886(plasma membrane);GO:0015171(amino acid transmembrane transporter activity)
ata-miR2118b-5p	XM_016660424.1	XM_016660424.1	At1g50180	putative disease resistance protein At1g50180	581-602	2.2	GO:0005524(ATP binding);GO:0006952(defense response);GO:0009506(plasmodesma);GO:0043531(ADP binding)	ko04626(Plant-pathogen interaction)
ata-miR2118b-5p	XM_016634656.1	XM_016634656.1	R1B-16	putative late blight resistance protein homolog R1B-14	1842-1863	2.2	GO:0005524(ATP binding);GO:0005886(plasma membrane);GO:0006952(defense response);GO:0043531(ADP binding)	ko04626(Plant-pathogen interaction)
ata-miR2118b-5p	XM_016634587.1	XM_016634587.1	R1B-16	putative late blight resistance protein homolog R1B-14	2172-2193	2.2	GO:0005524(ATP binding);GO:0005886(plasma membrane);GO:0006952(defense response);GO:0043531(ADP binding)	ko04626(Plant-pathogen interaction)
ata-miR2118b-5p	XM_016577828.1	XM_016577828.1	-	-	1416-1437	2.5	GO:0003674(molecular_function);GO:0005739(mitochondrion);GO:0008150(biological_process)
ata-miR2118b-5p	XM_016659117.1	XM_016659117.1	R1B-16	putative late blight resistance protein homolog R1B-14	575-596	2	GO:0005524(ATP binding);GO:0006952(defense response);GO:0043531(ADP binding)	ko04626(Plant-pathogen interaction)
ata-miR2118b-5p	XM_016595708.1	XM_016595708.1	R1B-16	putative late blight resistance protein homolog R1B-14	687-708	2.5	GO:0005524(ATP binding);GO:0005886(plasma membrane);GO:0006952(defense response);GO:0043531(ADP binding)	ko04626(Plant-pathogen interaction)
ata-miR2118b-5p	XM_016588869.1	XM_016588869.1	EXO70A1	-	1939-1961	2.5	GO:0000145(exocyst);GO:0005634(nucleus);GO:0006887(exocytosis);GO:0006904(vesicle docking involved in exocytosis)
ata-miR2118b-5p	XM_016611532.1	XM_016611532.1	-	HSPA4 nucleotide-binding domain protein	968-988	2.5	GO:0005737(cytoplasm);GO:0006952(defense response);GO:0007165(signal transduction);GO:0016021(integral component of membrane);GO:0043531(ADP binding)	ko03040(Spliceosome);ko04141(Protein processing in endoplasmic reticulum);ko04144(Endocytosis)
ata-miR2118b-5p	XM_016649009.1	XM_016649009.1	R1B-12	putative late blight resistance protein homolog R1B-14	655-676	2.2	GO:0000166(nucleotide binding);GO:0002230(positive regulation of defense response to virus by host);GO:0002239(response to oomycetes);GO:0005515(protein binding);GO:0005524(ATP binding);GO:0005886(plasma membrane);GO:0006952(defense response);GO:0009416(response to light stimulus);GO:0009611(response to wounding);GO:0009626(plant-type hypersensitive response);GO:0009637(response to blue light);GO…	ko04626(Plant-pathogen interaction)
ata-miR2118b-5p	XM_016582723.1	XM_016582723.1	At1g50180	putative disease resistance protein At1g50180	581-602	2.2	GO:0005524(ATP binding);GO:0006952(defense response);GO:0009506(plasmodesma);GO:0043531(ADP binding)	ko04626(Plant-pathogen interaction)
ata-miR2118b-5p	XM_016651396.1	XM_016651396.1	EXO70A1	-	1903-1925	2.5	GO:0000145(exocyst);GO:0005634(nucleus);GO:0006887(exocytosis);GO:0006904(vesicle docking involved in exocytosis)
ata-miR2118b-5p	XM_016635411.1	XM_016635411.1	R1B-16	putative late blight resistance protein homolog R1B-14	534-555	2.2	GO:0005524(ATP binding);GO:0006952(defense response);GO:0043531(ADP binding)	ko04626(Plant-pathogen interaction)
ata-miR2118b-5p	XM_016635403.1	XM_016635403.1	R1B-16	putative late blight resistance protein homolog R1B-14	534-555	2.2	GO:0005524(ATP binding);GO:0006952(defense response);GO:0043531(ADP binding)	ko04626(Plant-pathogen interaction)
ata-miR2118b-5p	XM_016635399.1	XM_016635399.1	R1B-16	putative late blight resistance protein homolog R1B-14	534-555	2.2	GO:0005524(ATP binding);GO:0006952(defense response);GO:0043531(ADP binding)	ko04626(Plant-pathogen interaction)
ata-miR2118b-5p	XM_016635426.1	XM_016635426.1	R1B-16	putative late blight resistance protein homolog R1B-14	722-743	2.2	GO:0005524(ATP binding);GO:0005886(plasma membrane);GO:0006952(defense response);GO:0043531(ADP binding)	ko04626(Plant-pathogen interaction)
ata-miR2118b-5p	XM_016640504.1	XM_016640504.1	R1A-4	putative late blight resistance protein homolog R1B-23	1738-1759	2.2	GO:0005524(ATP binding);GO:0005575(cellular_component);GO:0006952(defense response);GO:0043531(ADP binding)	ko04626(Plant-pathogen interaction)
ata-miR2118b-5p	XM_016587374.1	XM_016587374.1	R1B-23	putative late blight resistance protein homolog R1B-23	855-876	2.2	GO:0005524(ATP binding);GO:0006952(defense response);GO:0009506(plasmodesma);GO:0043531(ADP binding)	ko04626(Plant-pathogen interaction)
ata-miR2118b-5p	XM_016587375.1	XM_016587375.1	R1B-23	putative late blight resistance protein homolog R1A-10	855-876	2.2	GO:0005524(ATP binding);GO:0006952(defense response);GO:0009506(plasmodesma);GO:0043531(ADP binding)	ko04626(Plant-pathogen interaction)
ata-miR2118b-5p	XM_016618334.1	XM_016618334.1	EDR2L	-	1065-1086	2.5	GO:0005634(nucleus);GO:0005886(plasma membrane);GO:0007165(signal transduction);GO:0008289(lipid binding);GO:0035091(phosphatidylinositol binding)
ata-miR2118b-5p	XM_016604296.1	XM_016604296.1	-	HSPA4 nucleotide-binding domain protein	778-800	2.2	GO:0005515(protein binding)	ko03040(Spliceosome);ko04141(Protein processing in endoplasmic reticulum);ko04144(Endocytosis)
ata-miR2118b-5p	XM_016657608.1	XM_016657608.1	R1B-16	putative late blight resistance protein homolog R1B-14	588-609	2.2	GO:0000166(nucleotide binding);GO:0002230(positive regulation of defense response to virus by host);GO:0002239(response to oomycetes);GO:0005515(protein binding);GO:0005524(ATP binding);GO:0005886(plasma membrane);GO:0006952(defense response);GO:0009416(response to light stimulus);GO:0009611(response to wounding);GO:0009626(plant-type hypersensitive response);GO:0009637(response to blue light);GO…	ko04626(Plant-pathogen interaction)
ata-miR2118b-5p	XM_016657609.1	XM_016657609.1	R1B-12	putative late blight resistance protein homolog R1B-14	1231-1252	1.8	GO:0005524(ATP binding);GO:0006952(defense response);GO:0043531(ADP binding)	ko04626(Plant-pathogen interaction)
ata-miR2118b-5p	XM_016658021.1	XM_016658021.1	R1A-10	putative late blight resistance protein homolog R1B-23	1100-1121	2.5	GO:0005524(ATP binding);GO:0006952(defense response);GO:0009506(plasmodesma);GO:0043531(ADP binding)	ko04626(Plant-pathogen interaction)
ata-miR2118b-5p	XM_016658019.1	XM_016658019.1	R1A-10	putative late blight resistance protein homolog R1B-23	974-995	2.5	GO:0005524(ATP binding);GO:0006952(defense response);GO:0009506(plasmodesma);GO:0043531(ADP binding)	ko04626(Plant-pathogen interaction)
ata-miR2118b-5p	XM_016658018.1	XM_016658018.1	R1A-10	putative late blight resistance protein homolog R1B-23	973-994	2.5	GO:0005524(ATP binding);GO:0006952(defense response);GO:0009506(plasmodesma);GO:0043531(ADP binding)	ko04626(Plant-pathogen interaction)
ata-miR2118b-5p	XM_016605134.1	XM_016605134.1	R1B-16	putative late blight resistance protein homolog R1B-14	963-984	2.5	GO:0005524(ATP binding);GO:0005634(nucleus);GO:0005737(cytoplasm);GO:0005886(plasma membrane);GO:0006952(defense response);GO:0009626(plant-type hypersensitive response);GO:0009814(defense response, incompatible interaction);GO:0043531(ADP binding)	ko04626(Plant-pathogen interaction)
ata-miR2118b-5p	XM_016605218.1	XM_016605218.1	R1B-16	putative late blight resistance protein homolog R1B-14	2093-2114	2.2	GO:0005524(ATP binding);GO:0005886(plasma membrane);GO:0006952(defense response);GO:0043531(ADP binding)	ko04626(Plant-pathogen interaction)
ata-miR2118b-5p	XM_016658352.1	XM_016658352.1	R1C-3	putative late blight resistance protein homolog R1B-14	56-77	2	GO:0005524(ATP binding);GO:0006952(defense response);GO:0009506(plasmodesma);GO:0043531(ADP binding)	ko04626(Plant-pathogen interaction)
ata-miR2118b-5p	XM_016643312.1	XM_016643312.1	R1B-16	putative late blight resistance protein homolog R1B-14	606-627	2.5	GO:0005524(ATP binding);GO:0005886(plasma membrane);GO:0006952(defense response);GO:0043531(ADP binding)	ko04626(Plant-pathogen interaction)
ata-miR2118b-5p	XM_016643313.1	XM_016643313.1	R1B-16	putative late blight resistance protein homolog R1B-14	606-627	2.5	GO:0005524(ATP binding);GO:0005886(plasma membrane);GO:0006952(defense response);GO:0043531(ADP binding)	ko04626(Plant-pathogen interaction)
ata-miR2118b-5p	XM_016659951.1	XM_016659951.1	-	-	906-927	2.5	GO:0003674(molecular_function);GO:0005739(mitochondrion);GO:0008150(biological_process)
zma-miR2275b-3p_1ss22AG	XM_016660309.1	XM_016660309.1	Os05g0361200	ferrochelatase-2	1346-1367	2.2	GO:0004325(ferrochelatase activity);GO:0006783(heme biosynthetic process)	ko00860(Porphyrin and chlorophyll metabolism)
zma-miR2275b-3p_1ss22AG	XM_016660308.1	XM_016660308.1	Os05g0361200	ferrochelatase-2	1346-1367	2.2	GO:0004325(ferrochelatase activity);GO:0006783(heme biosynthetic process)	ko00860(Porphyrin and chlorophyll metabolism)
zma-miR2275b-3p_1ss22AG	XM_016660310.1	XM_016660310.1	Os05g0361200	ferrochelatase-2	1346-1367	2.2	GO:0004325(ferrochelatase activity);GO:0006783(heme biosynthetic process)	ko00860(Porphyrin and chlorophyll metabolism)
zma-miR2275b-3p_1ss22AG	XM_016623173.1	XM_016623173.1	PCMP-E101	Pentatricopeptide repeat superfamily protein isoform 1	1374-1395	2.5	GO:0003674(molecular_function);GO:0005739(mitochondrion);GO:0008150(biological_process)	ko01212(Fatty acid metabolism);ko00062(Fatty acid elongation)
zma-miR2275b-3p_1ss22AG	XM_016625272.1	XM_016625272.1	-	-	2443-2464	1.8	GO:0005739(mitochondrion);GO:0009507(chloroplast);GO:0009941(chloroplast envelope);GO:0016021(integral component of membrane)
zma-miR2275b-3p_1ss22AG	XM_016579030.1	XM_016579030.1	R1B-16	putative late blight resistance protein homolog R1B-14	1186-1206	2.5	GO:0005524(ATP binding);GO:0006952(defense response);GO:0043531(ADP binding)	ko04626(Plant-pathogen interaction)
zma-miR2275b-3p_1ss22AG	XM_016650430.1	XM_016650430.1	CBSPPR1	-	500-521	2.2	GO:0005739(mitochondrion);GO:0005829(cytosol);GO:0008150(biological_process)
zma-miR2275b-3p_1ss22AG	XM_016650429.1	XM_016650429.1	CBSPPR1	-	498-519	2.2	GO:0005739(mitochondrion);GO:0005829(cytosol);GO:0008150(biological_process)
zma-miR2275b-3p_1ss22AG	XM_016613142.1	XM_016613142.1	PCMP-E101	Pentatricopeptide repeat superfamily protein isoform 1	1569-1590	2.5	GO:0003674(molecular_function);GO:0005739(mitochondrion);GO:0008150(biological_process)	ko01212(Fatty acid metabolism);ko00062(Fatty acid elongation)
zma-miR2275b-3p_1ss22AG	XM_016652811.1	XM_016652811.1	ITN1	-	553-574	2	GO:0005886(plasma membrane);GO:0007165(signal transduction)
zma-miR2275b-3p_1ss22AG	XM_016600393.1	XM_016600393.1	Os05g0361200	ferrochelatase	504-525	2.2	GO:0004325(ferrochelatase activity);GO:0006783(heme biosynthetic process)	ko00860(Porphyrin and chlorophyll metabolism)
zma-miR2275b-3p_1ss22AG	XM_016603412.1	XM_016603412.1	R1B-12	putative late blight resistance protein homolog R1B-14	257-277	2.2	GO:0005524(ATP binding);GO:0006952(defense response);GO:0043531(ADP binding)	ko04626(Plant-pathogen interaction)
zma-miR2275b-3p_1ss22AG	XM_016618694.1	XM_016618694.1	R1B-16	putative late blight resistance protein homolog R1B-14	528-549	1.8	GO:0005524(ATP binding);GO:0005575(cellular_component);GO:0006952(defense response);GO:0043531(ADP binding)	ko04626(Plant-pathogen interaction)
zma-miR2275b-3p_1ss22AG	XM_016656596.1	XM_016656596.1	R1B-16	putative late blight resistance protein homolog R1B-14	926-946	2	GO:0005524(ATP binding);GO:0005634(nucleus);GO:0005737(cytoplasm);GO:0005886(plasma membrane);GO:0006952(defense response);GO:0009626(plant-type hypersensitive response);GO:0009814(defense response, incompatible interaction);GO:0043531(ADP binding)	ko04626(Plant-pathogen interaction)
zma-miR2275b-3p_1ss22AG	XM_016656593.1	XM_016656593.1	R1B-16	putative late blight resistance protein homolog R1B-14	1266-1286	2	GO:0005524(ATP binding);GO:0005634(nucleus);GO:0005737(cytoplasm);GO:0005886(plasma membrane);GO:0006952(defense response);GO:0009626(plant-type hypersensitive response);GO:0009814(defense response, incompatible interaction);GO:0043531(ADP binding)	ko04626(Plant-pathogen interaction)
zma-miR2275b-3p_1ss22AG	XM_016656595.1	XM_016656595.1	R1B-16	putative late blight resistance protein homolog R1B-14	1363-1383	2	GO:0005524(ATP binding);GO:0005634(nucleus);GO:0005737(cytoplasm);GO:0005886(plasma membrane);GO:0006952(defense response);GO:0009626(plant-type hypersensitive response);GO:0009814(defense response, incompatible interaction);GO:0043531(ADP binding)	ko04626(Plant-pathogen interaction)
zma-miR2275b-3p_1ss22AG	XM_016656592.1	XM_016656592.1	R1B-16	putative late blight resistance protein homolog R1B-14	1363-1383	2	GO:0005524(ATP binding);GO:0005634(nucleus);GO:0005737(cytoplasm);GO:0005886(plasma membrane);GO:0006952(defense response);GO:0009626(plant-type hypersensitive response);GO:0009814(defense response, incompatible interaction);GO:0043531(ADP binding)	ko04626(Plant-pathogen interaction)
zma-miR2275b-3p_1ss22AG	XM_016656594.1	XM_016656594.1	R1B-16	putative late blight resistance protein homolog R1B-14	1391-1411	2	GO:0005524(ATP binding);GO:0005634(nucleus);GO:0005737(cytoplasm);GO:0005886(plasma membrane);GO:0006952(defense response);GO:0009626(plant-type hypersensitive response);GO:0009814(defense response, incompatible interaction);GO:0043531(ADP binding)	ko04626(Plant-pathogen interaction)
zma-miR2275b-3p_1ss22AG	XM_016656597.1	XM_016656597.1	R1B-16	putative late blight resistance protein homolog R1B-14	1363-1383	2	GO:0005524(ATP binding);GO:0005634(nucleus);GO:0005737(cytoplasm);GO:0005886(plasma membrane);GO:0006952(defense response);GO:0009626(plant-type hypersensitive response);GO:0009814(defense response, incompatible interaction);GO:0043531(ADP binding)	ko04626(Plant-pathogen interaction)
zma-miR2275b-3p_1ss22AG	XM_016657341.1	XM_016657341.1	POLH	-	758-778	2.5	GO:0003684(damaged DNA binding);GO:0003887(DNA-directed DNA polymerase activity);GO:0005515(protein binding);GO:0005634(nucleus);GO:0006260(DNA replication);GO:0006281(DNA repair);GO:0009650(UV protection);GO:0010224(response to UV-B);GO:0042276(error-prone translesion synthesis);GO:0046872(metal ion binding)
zma-miR2275b-3p_1ss22AG	XM_016657342.1	XM_016657342.1	POLH	-	758-778	2.5	GO:0003684(damaged DNA binding);GO:0003887(DNA-directed DNA polymerase activity);GO:0005515(protein binding);GO:0005634(nucleus);GO:0006260(DNA replication);GO:0006281(DNA repair);GO:0009650(UV protection);GO:0010224(response to UV-B);GO:0042276(error-prone translesion synthesis);GO:0046872(metal ion binding)
zma-miR2275b-3p_1ss22AG	XM_016657800.1	XM_016657800.1	TPK1	-	967-988	2.2	GO:0009705(plant-type vacuole membrane)
zma-miR2275b-3p_1ss22AG	XM_016657801.1	XM_016657801.1	TPK1	-	878-899	2.2	GO:0009705(plant-type vacuole membrane)
zma-miR2275b-3p_1ss22AG	XM_016657802.1	XM_016657802.1	TPK1	-	797-818	2.2	GO:0009705(plant-type vacuole membrane)
zma-miR2275b-3p_1ss22AG	XM_016658415.1	XM_016658415.1	NRPA1	DNA-directed RNA polymerase I subunit 1	130-151	2.5	GO:0001054(RNA polymerase I activity);GO:0005736(DNA-directed RNA polymerase I complex)	ko00230(Purine metabolism);ko00240(Pyrimidine metabolism);ko03020(RNA polymerase)
zma-miR2275b-3p_1ss22AG	XM_016643153.1	XM_016643153.1	R1A-10	putative late blight resistance protein homolog R1B-14	2962-2982	2	GO:0005524(ATP binding);GO:0005634(nucleus);GO:0005737(cytoplasm);GO:0005886(plasma membrane);GO:0006952(defense response);GO:0009626(plant-type hypersensitive response);GO:0009814(defense response, incompatible interaction);GO:0043531(ADP binding)	ko04626(Plant-pathogen interaction)
zma-miR2275b-3p_1ss22AG	XM_016658652.1	XM_016658652.1	-	-	282-302	2.2	GO:0016787(hydrolase activity)
zma-miR2275b-3p_1ss22AG	XM_016658651.1	XM_016658651.1	-	-	376-396	2.2	GO:0016787(hydrolase activity)
zma-miR2275b-3p_1ss22AG	XM_016643412.1	XM_016643412.1	R1B-16	putative late blight resistance protein homolog R1B-14	1232-1252	2.5	GO:0005524(ATP binding);GO:0005634(nucleus);GO:0005737(cytoplasm);GO:0005886(plasma membrane);GO:0006952(defense response);GO:0009626(plant-type hypersensitive response);GO:0009814(defense response, incompatible interaction);GO:0043531(ADP binding)	ko04626(Plant-pathogen interaction)
zma-miR2275b-3p_1ss22AG	XM_016621177.1	XM_016621177.1	PCO2	plant cysteine oxidase 2	1099-1120	2.5	GO:0009061(anaerobic respiration);GO:0018171(peptidyl-cysteine oxidation);GO:0070483(detection of hypoxia)	ko00430(Taurine and hypotaurine metabolism)
zma-miR2275b-3p_1ss22AG	XM_016621179.1	XM_016621179.1	PCO2	plant cysteine oxidase 2	1106-1127	2.5	GO:0009061(anaerobic respiration);GO:0018171(peptidyl-cysteine oxidation);GO:0070483(detection of hypoxia)	ko00430(Taurine and hypotaurine metabolism)
zma-miR2275b-3p_1ss22AG	XM_016621178.1	XM_016621178.1	PCO2	plant cysteine oxidase 2	1097-1118	2.5	GO:0009061(anaerobic respiration);GO:0018171(peptidyl-cysteine oxidation);GO:0070483(detection of hypoxia)	ko00430(Taurine and hypotaurine metabolism)
osa-miR2275d	XM_016592239.1	XM_016592239.1	-	-	593-613	2.5	-
osa-miR2275d	XM_016645023.1	XM_016645023.1	CYP83B1	cytochrome P450 83B1	388-408	2.5	GO:0016020(membrane);GO:0016709(oxidoreductase activity, acting on paired donors, with incorporation or reduction of molecular oxygen, NAD);GO:0044550(secondary metabolite biosynthetic process)	ko01210(2-Oxocarboxylic acid metabolism);ko00380(Tryptophan metabolism);ko00966(Glucosinolate biosynthesis)
osa-miR2275d	XM_016649787.1	XM_016649787.1	v1g247787	-	488-509	2.5	GO:0003674(molecular_function);GO:0008150(biological_process)
osa-miR2275d	XM_016649794.1	XM_016649794.1	v1g247787	-	570-591	2.5	GO:0003674(molecular_function);GO:0008150(biological_process)
osa-miR2275d	XM_016646921.1	XM_016646921.1	ABCF4	ATP-binding cassette superfamily	995-1017	2.5	GO:0005215(transporter activity);GO:0005524(ATP binding);GO:0005886(plasma membrane);GO:0006810(transport);GO:0016887(ATPase activity)	ko02010(ABC transporters)
osa-miR2275d	XM_016594549.1	XM_016594549.1	DIVARICATA	polygalacturonase At1g48100-like	585-605	2.5	GO:0003677(DNA binding);GO:0003700(transcription factor activity, sequence-specific DNA binding);GO:0005634(nucleus);GO:0006351(transcription, DNA-templated);GO:0006355(regulation of transcription, DNA-templated)	ko00040(Pentose and glucuronate interconversions);ko00500(Starch and sucrose metabolism)
osa-miR2275d	XM_016625562.1	XM_016625562.1	SG1	-	599-621	2.5	GO:0005634(nucleus);GO:0008150(biological_process)
osa-miR2275d	XM_016610503.1	XM_016610503.1	At1g58602	putative late blight resistance protein homolog R1B-16	1123-1144	2.5	GO:0005524(ATP binding);GO:0006952(defense response);GO:0043531(ADP binding)	ko04626(Plant-pathogen interaction)
osa-miR2275d	XM_016610502.1	XM_016610502.1	At1g58602	putative late blight resistance protein homolog R1B-16	1123-1144	2.5	GO:0005524(ATP binding);GO:0006952(defense response);GO:0043531(ADP binding)	ko04626(Plant-pathogen interaction)
osa-miR2275d	XM_016610504.1	XM_016610504.1	At1g58602	putative late blight resistance protein homolog R1B-16	1123-1144	2.5	GO:0005524(ATP binding);GO:0006952(defense response);GO:0043531(ADP binding)	ko04626(Plant-pathogen interaction)
osa-miR2275d	XM_016648153.1	XM_016648153.1	CDR1	-	701-721	2.5	GO:0004190(aspartic-type endopeptidase activity);GO:0006508(proteolysis);GO:0030163(protein catabolic process)
osa-miR2275d	XM_016626978.1	XM_016626978.1	-	-	916-937	2.5	GO:0005768(endosome);GO:0005794(Golgi apparatus);GO:0005802(trans-Golgi network);GO:0016021(integral component of membrane);GO:0016757(transferase activity, transferring glycosyl groups)
osa-miR2275d	XM_016596460.1	XM_016596460.1	-	-	223-243	2.5	-
osa-miR2275d	XM_016649147.1	XM_016649147.1	ABCF4	hypothetical protein	1052-1074	2.5	GO:0005215(transporter activity);GO:0005524(ATP binding);GO:0005886(plasma membrane);GO:0006810(transport);GO:0016887(ATPase activity)	ko02010(ABC transporters)
osa-miR2275d	XM_016580606.1	XM_016580606.1	-	-	289-310	2.5	GO:0003674(molecular_function);GO:0005634(nucleus);GO:0008150(biological_process)
osa-miR2275d	XM_016580607.1	XM_016580607.1	-	-	288-309	2.5	GO:0003674(molecular_function);GO:0005634(nucleus);GO:0008150(biological_process)
osa-miR2275d	XM_016650121.1	XM_016650121.1	-	-	837-858	2.5	GO:0005768(endosome);GO:0005794(Golgi apparatus);GO:0005802(trans-Golgi network);GO:0016021(integral component of membrane);GO:0016757(transferase activity, transferring glycosyl groups)
osa-miR2275d	XM_016607182.1	XM_016607182.1	-	probable E3 ubiquitin ligase SUD1	308-328	2.5	-	ko04141(Protein processing in endoplasmic reticulum)
osa-miR2275d	XM_016607189.1	XM_016607189.1	-	-	309-329	2.5	-
osa-miR2275d	XM_016613251.1	XM_016613251.1	DIVARICATA	polygalacturonase At1g48100-like	519-539	2.5	GO:0003677(DNA binding);GO:0003700(transcription factor activity, sequence-specific DNA binding);GO:0005634(nucleus);GO:0006351(transcription, DNA-templated);GO:0006355(regulation of transcription, DNA-templated)	ko00040(Pentose and glucuronate interconversions);ko00500(Starch and sucrose metabolism)
osa-miR2275d	XM_016582348.1	XM_016582348.1	CYP71A1	cytochrome P450 83B1	72-92	2.5	GO:0016020(membrane);GO:0016709(oxidoreductase activity, acting on paired donors, with incorporation or reduction of molecular oxygen, NAD);GO:0044550(secondary metabolite biosynthetic process)	ko01210(2-Oxocarboxylic acid metabolism);ko00380(Tryptophan metabolism);ko00966(Glucosinolate biosynthesis)
osa-miR2275d	XM_016598447.1	XM_016598447.1	CYP83B1	cytochrome P450 83B1	357-377	2.5	GO:0016020(membrane);GO:0016709(oxidoreductase activity, acting on paired donors, with incorporation or reduction of molecular oxygen, NAD);GO:0044550(secondary metabolite biosynthetic process)	ko01210(2-Oxocarboxylic acid metabolism);ko00380(Tryptophan metabolism);ko00966(Glucosinolate biosynthesis)
osa-miR2275d	XM_016651611.1	XM_016651611.1	IQM2	-	936-956	2.5	GO:0005516(calmodulin binding);GO:0005634(nucleus);GO:0005737(cytoplasm);GO:0008150(biological_process)
osa-miR2275d	XM_016653519.1	XM_016653519.1	CYP73A4	trans-cinnamate 4-monooxygenase	460-480	2.5	GO:0009808(lignin metabolic process);GO:0016020(membrane);GO:0016710(trans-cinnamate 4-monooxygenase activity);GO:0044550(secondary metabolite biosynthetic process)	ko00360(Phenylalanine metabolism);ko00130(Ubiquinone and other terpenoid-quinone biosynthesis);ko00940(Phenylpropanoid biosynthesis);ko00945(Stilbenoid, diarylheptanoid and gingerol biosynthesis);ko00941(Flavonoid biosynthesis)
osa-miR2275d	XM_016601301.1	XM_016601301.1	At1g54570	uncharacterized LOC103423894	460-482	2	GO:0004144(diacylglycerol O-acyltransferase activity);GO:0010287(plastoglobule);GO:0033306(phytol metabolic process)	ko00100(Steroid biosynthesis)
osa-miR2275d	XM_016601576.1	XM_016601576.1	At3g62310	probable pre-mRNA-splicing factor ATP-dependent RNA helicase	309-330	1.5	GO:0004004(ATP-dependent RNA helicase activity);GO:0005634(nucleus);GO:0005737(cytoplasm);GO:0006396(RNA processing);GO:0044822(poly)	ko03040(Spliceosome)
osa-miR2275d	XM_016617073.1	XM_016617073.1	UGT74E2	UDP-glucosyltransferase	922-942	2.5	GO:0009813(flavonoid biosynthetic process);GO:0043231(intracellular membrane-bounded organelle);GO:0052696(flavonoid glucuronidation);GO:0080043(quercetin 3-O-glucosyltransferase activity);GO:0080044(quercetin 7-O-glucosyltransferase activity)	ko01210(2-Oxocarboxylic acid metabolism);ko00380(Tryptophan metabolism);ko00966(Glucosinolate biosynthesis)
osa-miR2275d	XM_016639982.1	XM_016639982.1	ARF8	auxin response factor 5	340-362	2.2	GO:0003677(DNA binding);GO:0003700(transcription factor activity, sequence-specific DNA binding);GO:0005634(nucleus);GO:0006351(transcription, DNA-templated);GO:0006355(regulation of transcription, DNA-templated);GO:0009733(response to auxin);GO:0009734(auxin-activated signaling pathway);GO:0009908(flower development)	ko04075(Plant hormone signal transduction)
osa-miR2275d	XM_016640223.1	XM_016640223.1	AKT1	probable cyclic nucleotide-gated ion channel 17-like	675-696	2	GO:0005249(voltage-gated potassium channel activity);GO:0005887(integral component of plasma membrane);GO:0042391(regulation of membrane potential)	ko04626(Plant-pathogen interaction)
osa-miR2275d	XM_016617808.1	XM_016617808.1	MYB3R-1	Cell division cycle 5-like protein	3253-3274	2.5	GO:0003677(DNA binding);GO:0003700(transcription factor activity, sequence-specific DNA binding);GO:0003713(transcription coactivator activity);GO:0005634(nucleus);GO:0006355(regulation of transcription, DNA-templated)	ko03040(Spliceosome)
osa-miR2275d	XM_016617809.1	XM_016617809.1	MYB3R-1	Cell division cycle 5-like protein	3258-3279	2.5	GO:0003677(DNA binding);GO:0003700(transcription factor activity, sequence-specific DNA binding);GO:0003713(transcription coactivator activity);GO:0005634(nucleus);GO:0006355(regulation of transcription, DNA-templated)	ko03040(Spliceosome)
osa-miR2275d	XM_016617807.1	XM_016617807.1	MYB3R-1	Cell division cycle 5-like protein	3258-3279	2.5	GO:0003677(DNA binding);GO:0003700(transcription factor activity, sequence-specific DNA binding);GO:0003713(transcription coactivator activity);GO:0005634(nucleus);GO:0006355(regulation of transcription, DNA-templated)	ko03040(Spliceosome)
osa-miR2275d	XM_016633694.1	XM_016633694.1	-	-	2190-2212	2.5	GO:0004175(endopeptidase activity);GO:0005634(nucleus);GO:0016926(protein desumoylation);GO:0016929(SUMO-specific protease activity)
osa-miR2275d	XM_016656375.1	XM_016656375.1	LRK10L-1.1	hypothetical protein	1986-2007	2.5	GO:0004674(protein serine/threonine kinase activity);GO:0005886(plasma membrane);GO:0007166(cell surface receptor signaling pathway)	ko04626(Plant-pathogen interaction)
osa-miR2275d	XM_016656376.1	XM_016656376.1	LRK10L-1.1	hypothetical protein	1983-2004	2.5	GO:0004674(protein serine/threonine kinase activity);GO:0005886(plasma membrane);GO:0007166(cell surface receptor signaling pathway)	ko04626(Plant-pathogen interaction)
osa-miR2275d	XM_016640802.1	XM_016640802.1	-	-	317-338	2.5	GO:0003674(molecular_function);GO:0005634(nucleus);GO:0008150(biological_process)
osa-miR2275d	XM_016587690.1	XM_016587690.1	DIVARICATA	polygalacturonase At1g48100-like	536-556	2.5	GO:0003677(DNA binding);GO:0003700(transcription factor activity, sequence-specific DNA binding);GO:0005634(nucleus);GO:0006351(transcription, DNA-templated);GO:0006355(regulation of transcription, DNA-templated)	ko00040(Pentose and glucuronate interconversions);ko00500(Starch and sucrose metabolism)
osa-miR2275d	XM_016634596.1	XM_016634596.1	-	uncharacterized LOC102610907	193-213	2.5	-	ko01210(2-Oxocarboxylic acid metabolism);ko00460(Cyanoamino acid metabolism);ko00966(Glucosinolate biosynthesis)
osa-miR2275d	XM_016619153.1	XM_016619153.1	KIN14A	kinesin-1-like protein PSS1	579-600	2.5	GO:0003777(microtubule motor activity);GO:0005871(kinesin complex);GO:0007018(microtubule-based movement);GO:0016887(ATPase activity)	ko04144(Endocytosis)
osa-miR2275d	XM_016641831.1	XM_016641831.1	IQM2	-	944-964	2.5	GO:0005516(calmodulin binding);GO:0005634(nucleus);GO:0005737(cytoplasm);GO:0008150(biological_process)
osa-miR2275d	XM_016589357.1	XM_016589357.1	-	-	756-778	2	GO:0004175(endopeptidase activity);GO:0005634(nucleus);GO:0016926(protein desumoylation);GO:0016929(SUMO-specific protease activity)
osa-miR2275d	XM_016643153.1	XM_016643153.1	R1A-10	putative late blight resistance protein homolog R1B-14	512-534	2	GO:0005524(ATP binding);GO:0005634(nucleus);GO:0005737(cytoplasm);GO:0005886(plasma membrane);GO:0006952(defense response);GO:0009626(plant-type hypersensitive response);GO:0009814(defense response, incompatible interaction);GO:0043531(ADP binding)	ko04626(Plant-pathogen interaction)
osa-miR2275d	XM_016643328.1	XM_016643328.1	v1g247787	-	481-502	2.5	GO:0003674(molecular_function);GO:0008150(biological_process)
osa-miR2275d	XM_016643327.1	XM_016643327.1	v1g247787	-	481-502	2.5	GO:0003674(molecular_function);GO:0008150(biological_process)
osa-miR2275d	XM_016590029.1	XM_016590029.1	GRF3	-	687-709	2.5	GO:0005524(ATP binding);GO:0005634(nucleus);GO:0006351(transcription, DNA-templated);GO:0006355(regulation of transcription, DNA-templated);GO:0008285(negative regulation of cell proliferation);GO:0009624(response to nematode);GO:0044212(transcription regulatory region DNA binding);GO:0048364(root development);GO:0048366(leaf development);GO:0061062(regulation of nematode larval development)
osa-miR2275d	XM_016621033.1	XM_016621033.1	-	-	238-258	2	-
osa-miR2275d	XM_016637287.1	XM_016637287.1	LRK10L-1.1	serine/threonine-protein kinase PBS1-like	2122-2143	2.5	GO:0004674(protein serine/threonine kinase activity);GO:0005886(plasma membrane);GO:0007166(cell surface receptor signaling pathway)	ko04626(Plant-pathogen interaction)
osa-miR2275d	XM_016644396.1	XM_016644396.1	CYP83B1	cytochrome P450 83B1	391-411	2.5	GO:0016020(membrane);GO:0016709(oxidoreductase activity, acting on paired donors, with incorporation or reduction of molecular oxygen, NAD);GO:0044550(secondary metabolite biosynthetic process)	ko01210(2-Oxocarboxylic acid metabolism);ko00380(Tryptophan metabolism);ko00966(Glucosinolate biosynthesis)
osa-miR2275d	XM_016637923.1	XM_016637923.1	ARF8	auxin response factor 5	497-519	2.2	GO:0003677(DNA binding);GO:0003700(transcription factor activity, sequence-specific DNA binding);GO:0005634(nucleus);GO:0006351(transcription, DNA-templated);GO:0006355(regulation of transcription, DNA-templated);GO:0009733(response to auxin);GO:0009734(auxin-activated signaling pathway);GO:0009908(flower development)	ko04075(Plant hormone signal transduction)
osa-miR2275d	XM_016637925.1	XM_016637925.1	ARF8	auxin response factor 5	497-519	2.2	GO:0003677(DNA binding);GO:0003700(transcription factor activity, sequence-specific DNA binding);GO:0005634(nucleus);GO:0006351(transcription, DNA-templated);GO:0006355(regulation of transcription, DNA-templated);GO:0009733(response to auxin);GO:0009734(auxin-activated signaling pathway);GO:0009908(flower development)	ko04075(Plant hormone signal transduction)
osa-miR2275d	XM_016637924.1	XM_016637924.1	ARF8	auxin response factor 5	495-517	2.2	GO:0003677(DNA binding);GO:0003700(transcription factor activity, sequence-specific DNA binding);GO:0005634(nucleus);GO:0006351(transcription, DNA-templated);GO:0006355(regulation of transcription, DNA-templated);GO:0009733(response to auxin);GO:0009734(auxin-activated signaling pathway);GO:0009908(flower development)	ko04075(Plant hormone signal transduction)
osa-miR2275d	XM_016638344.1	XM_016638344.1	GRF3	-	707-729	2.2	GO:0005524(ATP binding);GO:0005634(nucleus);GO:0006351(transcription, DNA-templated);GO:0006355(regulation of transcription, DNA-templated);GO:0008285(negative regulation of cell proliferation);GO:0009624(response to nematode);GO:0044212(transcription regulatory region DNA binding);GO:0048364(root development);GO:0048366(leaf development);GO:0061062(regulation of nematode larval development)
gma-miR4995_L+1R+2_1ss7GA	XM_016623629.1	XM_016623629.1	SAHH	adenosylhomocysteinase	1350-1372	2.5	GO:0004013(adenosylhomocysteinase activity);GO:0005829(cytosol);GO:0033353(S-adenosylmethionine cycle)	ko00270(Cysteine and methionine metabolism)
gma-miR4995_L+1R+2_1ss7GA	XM_016607828.1	XM_016607828.1	SAHH	adenosylhomocysteinase	1342-1364	2.5	GO:0004013(adenosylhomocysteinase activity);GO:0005829(cytosol);GO:0033353(S-adenosylmethionine cycle)	ko00270(Cysteine and methionine metabolism)
gma-miR4995_L+1R+2_1ss7GA	XM_016603990.1	XM_016603990.1	SAHH	adenosylhomocysteinase	1341-1363	2.5	GO:0004013(adenosylhomocysteinase activity);GO:0005829(cytosol);GO:0033353(S-adenosylmethionine cycle)	ko00270(Cysteine and methionine metabolism)
osa-miR5497	XM_016607527.1	XM_016607527.1	RRC1	U2 snRNP-associated SURP motif-containing protein-like	1330-1350	2.5	GO:0000166(nucleotide binding);GO:0003723(RNA binding);GO:0005634(nucleus);GO:0006397(mRNA processing);GO:0008380(RNA splicing);GO:0016607(nuclear speck)	ko03040(Spliceosome)
osa-miR5497	XM_016607528.1	XM_016607528.1	RRC1	U2 snRNP-associated SURP motif-containing protein-like	1353-1373	2.5	GO:0000166(nucleotide binding);GO:0003723(RNA binding);GO:0005634(nucleus);GO:0006397(mRNA processing);GO:0008380(RNA splicing);GO:0016607(nuclear speck)	ko03040(Spliceosome)
osa-miR5497	XM_016607525.1	XM_016607525.1	RRC1	U2 snRNP-associated SURP motif-containing protein-like	1578-1598	2.5	GO:0000166(nucleotide binding);GO:0003723(RNA binding);GO:0005634(nucleus);GO:0006397(mRNA processing);GO:0008380(RNA splicing);GO:0016607(nuclear speck)	ko03040(Spliceosome)
osa-miR5497	XM_016607526.1	XM_016607526.1	RRC1	U2 snRNP-associated SURP motif-containing protein-like	1658-1678	2.5	GO:0000166(nucleotide binding);GO:0003723(RNA binding);GO:0005634(nucleus);GO:0006397(mRNA processing);GO:0008380(RNA splicing);GO:0016607(nuclear speck)	ko03040(Spliceosome)
osa-miR5497	XM_016607523.1	XM_016607523.1	RRC1	U2 snRNP-associated SURP motif-containing protein-like	1658-1678	2.5	GO:0000166(nucleotide binding);GO:0003723(RNA binding);GO:0005634(nucleus);GO:0006397(mRNA processing);GO:0008380(RNA splicing);GO:0016607(nuclear speck)	ko03040(Spliceosome)
osa-miR5497	XM_016607524.1	XM_016607524.1	RRC1	U2 snRNP-associated SURP motif-containing protein-like	1686-1706	2.5	GO:0000166(nucleotide binding);GO:0003723(RNA binding);GO:0005634(nucleus);GO:0006397(mRNA processing);GO:0008380(RNA splicing);GO:0016607(nuclear speck)	ko03040(Spliceosome)
osa-miR5497	XM_016660421.1	XM_016660421.1	GTE8	transcription initiation factor TFIID subunit 1-like	1324-1344	2.5	GO:0003677(DNA binding);GO:0005634(nucleus);GO:0006351(transcription, DNA-templated);GO:0006355(regulation of transcription, DNA-templated);GO:0009507(chloroplast)	ko03022(Basal transcription factors)
osa-miR5497	XM_016647026.1	XM_016647026.1	At5g10800	U2 snRNP-associated SURP motif-containing protein-like	1338-1358	1.5	GO:0000166(nucleotide binding);GO:0003723(RNA binding);GO:0005634(nucleus);GO:0006397(mRNA processing);GO:0008380(RNA splicing)	ko03040(Spliceosome)
osa-miR5497	XM_016647025.1	XM_016647025.1	At5g10800	U2 snRNP-associated SURP motif-containing protein-like	1341-1361	1.5	GO:0000166(nucleotide binding);GO:0003723(RNA binding);GO:0005634(nucleus);GO:0006397(mRNA processing);GO:0008380(RNA splicing)	ko03040(Spliceosome)
osa-miR5497	XM_016647024.1	XM_016647024.1	RRC1	U2 snRNP-associated SURP motif-containing protein-like	1703-1723	1.5	GO:0000166(nucleotide binding);GO:0003723(RNA binding);GO:0005634(nucleus);GO:0006397(mRNA processing);GO:0008380(RNA splicing);GO:0016607(nuclear speck)	ko03040(Spliceosome)
osa-miR5497	XM_016647023.1	XM_016647023.1	RRC1	U2 snRNP-associated SURP motif-containing protein-like	1706-1726	1.5	GO:0000166(nucleotide binding);GO:0003723(RNA binding);GO:0005634(nucleus);GO:0006397(mRNA processing);GO:0008380(RNA splicing);GO:0016607(nuclear speck)	ko03040(Spliceosome)
osa-miR5497	XM_016610995.1	XM_016610995.1	-	-	795-815	2.2	-
osa-miR5497	XM_016611749.1	XM_016611749.1	SECA2	protein translocase subunit SECA2	591-611	2.5	GO:0009306(protein secretion);GO:0015450(P-P-bond-hydrolysis-driven protein transmembrane transporter activity)	ko03060(Protein export)
osa-miR5497	XM_016611750.1	XM_016611750.1	SECA2	protein translocase subunit SECA2	592-612	2.5	GO:0009306(protein secretion);GO:0015450(P-P-bond-hydrolysis-driven protein transmembrane transporter activity)	ko03060(Protein export)
osa-miR5497	XM_016597050.1	XM_016597050.1	At5g10800	U2 snRNP-associated SURP motif-containing protein-like	1696-1716	1.5	GO:0000166(nucleotide binding);GO:0003723(RNA binding);GO:0005634(nucleus);GO:0006397(mRNA processing);GO:0008380(RNA splicing)	ko03040(Spliceosome)
osa-miR5497	XM_016597049.1	XM_016597049.1	At5g10800	U2 snRNP-associated SURP motif-containing protein-like	1699-1719	1.5	GO:0000166(nucleotide binding);GO:0003723(RNA binding);GO:0005634(nucleus);GO:0006397(mRNA processing);GO:0008380(RNA splicing)	ko03040(Spliceosome)
osa-miR5497	XM_016597051.1	XM_016597051.1	At5g10800	U2 snRNP-associated SURP motif-containing protein-like	1342-1362	1.5	GO:0000166(nucleotide binding);GO:0003723(RNA binding);GO:0005634(nucleus);GO:0006397(mRNA processing);GO:0008380(RNA splicing)	ko03040(Spliceosome)
osa-miR5497	XM_016597052.1	XM_016597052.1	RRC1	U2 snRNP-associated SURP motif-containing protein-like	1345-1365	1.5	GO:0000166(nucleotide binding);GO:0003723(RNA binding);GO:0005634(nucleus);GO:0006397(mRNA processing);GO:0008380(RNA splicing);GO:0016607(nuclear speck)	ko03040(Spliceosome)
osa-miR5497	XM_016597046.1	XM_016597046.1	RRC1	U2 snRNP-associated SURP motif-containing protein-like	1602-1622	1.5	GO:0000166(nucleotide binding);GO:0003723(RNA binding);GO:0005634(nucleus);GO:0006397(mRNA processing);GO:0008380(RNA splicing);GO:0016607(nuclear speck)	ko03040(Spliceosome)
osa-miR5497	XM_016597045.1	XM_016597045.1	RRC1	U2 snRNP-associated SURP motif-containing protein-like	1797-1817	1.5	GO:0000166(nucleotide binding);GO:0003723(RNA binding);GO:0005634(nucleus);GO:0006397(mRNA processing);GO:0008380(RNA splicing);GO:0016607(nuclear speck)	ko03040(Spliceosome)
osa-miR5497	XM_016597044.1	XM_016597044.1	RRC1	U2 snRNP-associated SURP motif-containing protein-like	1800-1820	1.5	GO:0000166(nucleotide binding);GO:0003723(RNA binding);GO:0005634(nucleus);GO:0006397(mRNA processing);GO:0008380(RNA splicing);GO:0016607(nuclear speck)	ko03040(Spliceosome)
osa-miR5497	XM_016597048.1	XM_016597048.1	RRC1	U2 snRNP-associated SURP motif-containing protein-like	2016-2036	1.5	GO:0000166(nucleotide binding);GO:0003723(RNA binding);GO:0005634(nucleus);GO:0006397(mRNA processing);GO:0008380(RNA splicing);GO:0016607(nuclear speck)	ko03040(Spliceosome)
osa-miR5497	XM_016597047.1	XM_016597047.1	RRC1	U2 snRNP-associated SURP motif-containing protein-like	2023-2043	1.5	GO:0000166(nucleotide binding);GO:0003723(RNA binding);GO:0005634(nucleus);GO:0006397(mRNA processing);GO:0008380(RNA splicing);GO:0016607(nuclear speck)	ko03040(Spliceosome)
osa-miR5497	XM_016650488.1	XM_016650488.1	SECA2	protein translocase subunit SECA2	66-86	2.5	GO:0009306(protein secretion);GO:0015450(P-P-bond-hydrolysis-driven protein transmembrane transporter activity)	ko03060(Protein export)
osa-miR5497	XM_016606614.1	XM_016606614.1	-	uncharacterized LOC101785211	1008-1027	2.5	GO:0003674(molecular_function);GO:0005634(nucleus);GO:0008150(biological_process)	ko00380(Tryptophan metabolism)
osa-miR5497	XM_016613393.1				588-608	2.5	-
osa-miR5497	XM_016613394.1				613-633	2.5	-
osa-miR5497	XM_016599927.1	XM_016599927.1	-	uncharacterized LOC101785211	1409-1428	2.5	GO:0003674(molecular_function);GO:0005634(nucleus);GO:0008150(biological_process)	ko00380(Tryptophan metabolism)
osa-miR5497	XM_016616430.1	XM_016616430.1	At1g79600	uncharacterized aarF domain-containing protein kinase At1g79600	1210-1230	2.2	GO:0004672(protein kinase activity);GO:0005524(ATP binding);GO:0005886(plasma membrane);GO:0006468(protein phosphorylation);GO:0009507(chloroplast);GO:0010287(plastoglobule);GO:0050821(protein stabilization);GO:1902171(regulation of tocopherol cyclase activity)	ko04626(Plant-pathogen interaction)
osa-miR5497	XM_016617143.1	XM_016617143.1	GTE8	-	1320-1340	2.5	GO:0003677(DNA binding);GO:0005634(nucleus);GO:0006351(transcription, DNA-templated);GO:0006355(regulation of transcription, DNA-templated);GO:0009507(chloroplast)
osa-miR5497	XM_016602193.1				1170-1190	2	-
osa-miR5497	XM_016618697.1	XM_016618697.1	RLP12	-	1280-1299	2.5	GO:0005886(plasma membrane);GO:0007165(signal transduction);GO:0016021(integral component of membrane);GO:0016301(kinase activity)
osa-miR5497	XM_016618698.1	XM_016618698.1	RLP12	-	1280-1299	2.5	GO:0005886(plasma membrane);GO:0007165(signal transduction);GO:0016021(integral component of membrane);GO:0016301(kinase activity)
osa-miR5497	XM_016642545.1	XM_016642545.1	RRC1	U2 snRNP-associated SURP motif-containing protein-like	634-654	1.5	GO:0000166(nucleotide binding);GO:0003723(RNA binding);GO:0005634(nucleus);GO:0006397(mRNA processing);GO:0008380(RNA splicing);GO:0016607(nuclear speck)	ko03040(Spliceosome)
osa-miR5497	XM_016620238.1	XM_016620238.1	At1g48120	UDP-arabinose 4-epimerase 1-like	93-113	2	GO:0005634(nucleus);GO:0008150(biological_process);GO:0008483(transaminase activity)	ko00520(Amino sugar and nucleotide sugar metabolism)
osa-miR5497	XM_016589639.1	XM_016589639.1	At1g48120	UDP-arabinose 4-epimerase 1-like	93-113	2	GO:0005634(nucleus);GO:0008150(biological_process);GO:0008483(transaminase activity)	ko00520(Amino sugar and nucleotide sugar metabolism)
osa-miR5497	XM_016606126.1	XM_016606126.1	At1g79600	uncharacterized aarF domain-containing protein kinase At1g79600	1062-1082	2.2	GO:0004672(protein kinase activity);GO:0005524(ATP binding);GO:0005886(plasma membrane);GO:0006468(protein phosphorylation);GO:0009507(chloroplast);GO:0010287(plastoglobule);GO:0050821(protein stabilization);GO:1902171(regulation of tocopherol cyclase activity)	ko04626(Plant-pathogen interaction)
osa-miR5497	XM_016643692.1	XM_016643692.1	RRC1	U2 snRNP-associated SURP motif-containing protein-like	1666-1686	2.5	GO:0000166(nucleotide binding);GO:0003723(RNA binding);GO:0005634(nucleus);GO:0006397(mRNA processing);GO:0008380(RNA splicing);GO:0016607(nuclear speck)	ko03040(Spliceosome)
osa-miR5497	XM_016643693.1	XM_016643693.1	RRC1	U2 snRNP-associated SURP motif-containing protein-like	1666-1686	2.5	GO:0000166(nucleotide binding);GO:0003723(RNA binding);GO:0005634(nucleus);GO:0006397(mRNA processing);GO:0008380(RNA splicing);GO:0016607(nuclear speck)	ko03040(Spliceosome)
osa-miR5497	XM_016643694.1	XM_016643694.1	RRC1	U2 snRNP-associated SURP motif-containing protein-like	1355-1375	2.5	GO:0000166(nucleotide binding);GO:0003723(RNA binding);GO:0005634(nucleus);GO:0006397(mRNA processing);GO:0008380(RNA splicing);GO:0016607(nuclear speck)	ko03040(Spliceosome)
osa-miR5497	XM_016659997.1				699-719	2	-
osa-miR5509	XM_016660364.1	XM_016660364.1	EMB2369	leucine--tRNA ligase	2163-2182	2.2	GO:0004823(leucine-tRNA ligase activity);GO:0005739(mitochondrion);GO:0005829(cytosol);GO:0006429(leucyl-tRNA aminoacylation)	ko00970(Aminoacyl-tRNA biosynthesis)
osa-miR5509	XM_016660365.1	XM_016660365.1	EMB2369	leucine--tRNA ligase	2163-2182	2.2	GO:0004823(leucine-tRNA ligase activity);GO:0005739(mitochondrion);GO:0005829(cytosol);GO:0006429(leucyl-tRNA aminoacylation)	ko00970(Aminoacyl-tRNA biosynthesis)
osa-miR5509	XM_016607196.1	XM_016607196.1	-	cyanogenic beta-glucosidase-like	1147-1167	2	GO:0000981(RNA polymerase II transcription factor activity, sequence-specific DNA binding);GO:0003677(DNA binding);GO:0005654(nucleoplasm);GO:0005737(cytoplasm)	ko00500(Starch and sucrose metabolism);ko00460(Cyanoamino acid metabolism);ko00940(Phenylpropanoid biosynthesis)
osa-miR5509	XM_016607267.1	XM_016607267.1	-	cyanogenic beta-glucosidase-like	1037-1057	2	GO:0000981(RNA polymerase II transcription factor activity, sequence-specific DNA binding);GO:0003677(DNA binding);GO:0005654(nucleoplasm);GO:0005737(cytoplasm)	ko00500(Starch and sucrose metabolism);ko00460(Cyanoamino acid metabolism);ko00940(Phenylpropanoid biosynthesis)
osa-miR5509	XM_016607104.1	XM_016607104.1	-	uncharacterized LOC103425146	263-283	2	GO:0000981(RNA polymerase II transcription factor activity, sequence-specific DNA binding);GO:0003677(DNA binding);GO:0005634(nucleus);GO:0005654(nucleoplasm);GO:0005737(cytoplasm);GO:0008150(biological_process);GO:0009506(plasmodesma);GO:0046983(protein dimerization activity)	ko04075(Plant hormone signal transduction)
osa-miR5509	XM_016623850.1	XM_016623850.1	At3g50710	beta-glucosidase 46	565-584	2	GO:0003674(molecular_function);GO:0005634(nucleus);GO:0008150(biological_process)	ko00500(Starch and sucrose metabolism);ko00460(Cyanoamino acid metabolism);ko00940(Phenylpropanoid biosynthesis)
osa-miR5509	XM_016646427.1	XM_016646427.1	EMB2369	leucine--tRNA ligase	2127-2146	2.2	GO:0004823(leucine-tRNA ligase activity);GO:0005739(mitochondrion);GO:0005829(cytosol);GO:0006429(leucyl-tRNA aminoacylation)	ko00970(Aminoacyl-tRNA biosynthesis)
osa-miR5509	XM_016594008.1	XM_016594008.1	MLO1	-	343-363	2.2	GO:0005886(plasma membrane);GO:0006952(defense response)
osa-miR5509	XM_016595616.1	XM_016595616.1	-	-	72-91	2.5	-
osa-miR5509	XM_016579683.1	XM_016579683.1	-	-	1112-1131	2.5	GO:0003674(molecular_function);GO:0008150(biological_process)
osa-miR5509	XM_016580086.1	XM_016580086.1	EMB2369	uncharacterized LOC102587217	2668-2687	2.2	GO:0000171(ribonuclease MRP activity);GO:0000172(ribonuclease MRP complex);GO:0004526(ribonuclease P activity);GO:0005655(nucleolar ribonuclease P complex);GO:0008033(tRNA processing);GO:0090502(RNA phosphodiester bond hydrolysis, endonucleolytic)	ko03013(RNA transport);ko03008(Ribosome biogenesis in eukaryotes)
osa-miR5509	XM_016580085.1	XM_016580085.1	EMB2369	uncharacterized LOC102587217	2671-2690	2.2	GO:0000171(ribonuclease MRP activity);GO:0000172(ribonuclease MRP complex);GO:0004526(ribonuclease P activity);GO:0005655(nucleolar ribonuclease P complex);GO:0008033(tRNA processing);GO:0090502(RNA phosphodiester bond hydrolysis, endonucleolytic)	ko03013(RNA transport);ko03008(Ribosome biogenesis in eukaryotes)
osa-miR5509	XM_016580088.1	XM_016580088.1	EMB2369	uncharacterized LOC102587217	2671-2690	2.2	GO:0000171(ribonuclease MRP activity);GO:0000172(ribonuclease MRP complex);GO:0004526(ribonuclease P activity);GO:0005655(nucleolar ribonuclease P complex);GO:0008033(tRNA processing);GO:0090502(RNA phosphodiester bond hydrolysis, endonucleolytic)	ko03013(RNA transport);ko03008(Ribosome biogenesis in eukaryotes)
osa-miR5509	XM_016580087.1	XM_016580087.1	EMB2369	uncharacterized LOC102587217	2671-2690	2.2	GO:0000171(ribonuclease MRP activity);GO:0000172(ribonuclease MRP complex);GO:0004526(ribonuclease P activity);GO:0005655(nucleolar ribonuclease P complex);GO:0008033(tRNA processing);GO:0090502(RNA phosphodiester bond hydrolysis, endonucleolytic)	ko03013(RNA transport);ko03008(Ribosome biogenesis in eukaryotes)
osa-miR5509	XM_016596932.1	XM_016596932.1	RNFT2	E3 ubiquitin protein ligase RIN2-like	1623-1643	2.2	GO:0008270(zinc ion binding);GO:0016021(integral component of membrane)	ko04141(Protein processing in endoplasmic reticulum)
osa-miR5509	XM_016601369.1	XM_016601369.1	CNGC13	cyclic nucleotide-gated ion channel 1-like	671-691	2.5	GO:0005249(voltage-gated potassium channel activity);GO:0005887(integral component of plasma membrane);GO:0042391(regulation of membrane potential)	ko04626(Plant-pathogen interaction)
osa-miR5509	XM_016613404.1	XM_016613404.1	FLK	-	526-546	2.5	GO:0003676(nucleic acid binding);GO:0003723(RNA binding);GO:0005515(protein binding);GO:0005634(nucleus);GO:0005737(cytoplasm);GO:0006351(transcription, DNA-templated);GO:0006355(regulation of transcription, DNA-templated);GO:0009911(positive regulation of flower development)
osa-miR5509	XM_016613405.1	XM_016613405.1	FLK	-	517-537	2.5	GO:0003676(nucleic acid binding);GO:0003723(RNA binding);GO:0005515(protein binding);GO:0005634(nucleus);GO:0005737(cytoplasm);GO:0006351(transcription, DNA-templated);GO:0006355(regulation of transcription, DNA-templated);GO:0009911(positive regulation of flower development)
osa-miR5509	XM_016582679.1	XM_016582679.1	-	E3 ubiquitin protein ligase RIN2-like	1461-1481	2.2	GO:0008270(zinc ion binding);GO:0016021(integral component of membrane)	ko04141(Protein processing in endoplasmic reticulum)
osa-miR5509	XM_016614435.1	XM_016614435.1	-	-	72-91	2.5	-
osa-miR5509	XM_016614777.1	XM_016614777.1	-	PXMP2/4 family protein 4	980-1000	2.5	GO:0005739(mitochondrion);GO:0005778(peroxisomal membrane);GO:0008150(biological_process);GO:0016021(integral component of membrane)	ko04146(Peroxisome)
osa-miR5509	XM_016584191.1	XM_016584191.1	SMC3	structural maintenance of chromosomes protein 3-like	1049-1068	2.5	GO:0000775(chromosome, centromeric region);GO:0000785(chromatin);GO:0003682(chromatin binding);GO:0005524(ATP binding);GO:0005634(nucleus);GO:0005737(cytoplasm);GO:0005819(spindle);GO:0006281(DNA repair);GO:0007059(chromosome segregation);GO:0007062(sister chromatid cohesion);GO:0007064(mitotic sister chromatid cohesion);GO:0008278(cohesin complex);GO:0008280(cohesin core heterodimer);GO:0009506(…	ko00053(Ascorbate and aldarate metabolism);ko00480(Glutathione metabolism)
osa-miR5509	XM_016584192.1	XM_016584192.1	SMC3	structural maintenance of chromosomes protein 3-like	1049-1068	2.5	GO:0000775(chromosome, centromeric region);GO:0000785(chromatin);GO:0003682(chromatin binding);GO:0005524(ATP binding);GO:0005634(nucleus);GO:0005737(cytoplasm);GO:0005819(spindle);GO:0006281(DNA repair);GO:0007059(chromosome segregation);GO:0007062(sister chromatid cohesion);GO:0007064(mitotic sister chromatid cohesion);GO:0008278(cohesin complex);GO:0008280(cohesin core heterodimer);GO:0009506(…	ko00053(Ascorbate and aldarate metabolism);ko00480(Glutathione metabolism)
osa-miR5509	XM_016585137.1	XM_016585137.1	At5g02910	beta-glucosidase 46	78-97	2.5	GO:0003674(molecular_function);GO:0005634(nucleus);GO:0008150(biological_process)	ko00500(Starch and sucrose metabolism);ko00460(Cyanoamino acid metabolism);ko00940(Phenylpropanoid biosynthesis)
osa-miR5509	XM_016654180.1	XM_016654180.1	At1g78760	-	799-818	2	GO:0003674(molecular_function);GO:0005634(nucleus);GO:0008150(biological_process)
osa-miR5509	XM_016654179.1	XM_016654179.1	At1g78760	-	799-818	2	GO:0003674(molecular_function);GO:0005634(nucleus);GO:0008150(biological_process)
osa-miR5509	XM_016654177.1	XM_016654177.1	At1g78760	-	438-457	2	GO:0003674(molecular_function);GO:0005634(nucleus);GO:0008150(biological_process)
osa-miR5509	XM_016654176.1	XM_016654176.1	At1g78760	-	519-538	2	GO:0003674(molecular_function);GO:0005634(nucleus);GO:0008150(biological_process)
osa-miR5509	XM_016633242.1	XM_016633242.1	SMC3	-	2954-2973	2.5	GO:0000775(chromosome, centromeric region);GO:0000785(chromatin);GO:0003682(chromatin binding);GO:0005524(ATP binding);GO:0005634(nucleus);GO:0005737(cytoplasm);GO:0005819(spindle);GO:0006281(DNA repair);GO:0007059(chromosome segregation);GO:0007062(sister chromatid cohesion);GO:0007064(mitotic sister chromatid cohesion);GO:0008278(cohesin complex);GO:0008280(cohesin core heterodimer);GO:0009506(…
osa-miR5509	XM_016655981.1	XM_016655981.1	CDS1	phosphatidate cytidylyltransferase 1-like	1457-1476	2.2	GO:0004605(phosphatidate cytidylyltransferase activity);GO:0005789(endoplasmic reticulum membrane);GO:0006655(phosphatidylglycerol biosynthetic process);GO:0016024(CDP-diacylglycerol biosynthetic process)	ko00564(Glycerophospholipid metabolism);ko04070(Phosphatidylinositol signaling system)
osa-miR5509	XM_016587606.1	XM_016587606.1	At5g56690	-	87-106	2	GO:0003674(molecular_function);GO:0005634(nucleus);GO:0008150(biological_process)
osa-miR5509	XM_016634046.1	XM_016634046.1	RAC13	peroxidase 64-like	292-311	2.2	GO:0005525(GTP binding);GO:0005737(cytoplasm);GO:0005886(plasma membrane);GO:0007264(small GTPase mediated signal transduction);GO:0015031(protein transport)	ko00940(Phenylpropanoid biosynthesis)
osa-miR5509	XM_016620953.1	XM_016620953.1	-	-	1709-1728	2.5	GO:0003674(molecular_function);GO:0008150(biological_process)
osa-miR5509	XM_016621095.1	XM_016621095.1	PCMP-E14	pentatricopeptide repeat-containing protein At2g04860	2708-2729	2.5	GO:0005739(mitochondrion);GO:0008150(biological_process)	ko00500(Starch and sucrose metabolism)
osa-miR5509	XM_016590601.1	XM_016590601.1	-	PXMP2/4 family protein 4	995-1015	2.5	GO:0005739(mitochondrion);GO:0005778(peroxisomal membrane);GO:0008150(biological_process);GO:0016021(integral component of membrane)	ko04146(Peroxisome)
osa-miR5509	XM_016606533.1	XM_016606533.1	-	uncharacterized LOC106392594	396-416	2.5	GO:0003674(molecular_function);GO:0005575(cellular_component);GO:0008150(biological_process)	ko01210(2-Oxocarboxylic acid metabolism);ko01230(Biosynthesis of amino acids);ko00220(Arginine biosynthesis)
osa-miR5509	XM_016606854.1	XM_016606854.1	CDS1	phosphatidate cytidylyltransferase 1-like	1455-1474	2.2	GO:0004605(phosphatidate cytidylyltransferase activity);GO:0005789(endoplasmic reticulum membrane);GO:0006655(phosphatidylglycerol biosynthetic process);GO:0016024(CDP-diacylglycerol biosynthetic process)	ko00564(Glycerophospholipid metabolism);ko04070(Phosphatidylinositol signaling system)
osa-miR5793	XM_016577413.1	XM_016577413.1	PGAAIR	ribosomal protein S4	1919-1938	2.5	GO:0003677(DNA binding);GO:0005634(nucleus);GO:0005694(chromosome);GO:0005737(cytoplasm);GO:0006260(DNA replication);GO:0006284(base-excision repair);GO:0006302(double-strand break repair);GO:0006310(DNA recombination);GO:0009378(four-way junction helicase activity);GO:0032508(DNA duplex unwinding);GO:0043140(ATP-dependent 3'-5' DNA helicase activity)	ko03010(Ribosome)
osa-miR5793	XM_016577414.1	XM_016577414.1	PGAAIR	ribosomal protein S4	1919-1938	2.5	GO:0003677(DNA binding);GO:0005634(nucleus);GO:0005694(chromosome);GO:0005737(cytoplasm);GO:0006260(DNA replication);GO:0006284(base-excision repair);GO:0006302(double-strand break repair);GO:0006310(DNA recombination);GO:0009378(four-way junction helicase activity);GO:0032508(DNA duplex unwinding);GO:0043140(ATP-dependent 3'-5' DNA helicase activity)	ko03010(Ribosome)
osa-miR5793	XM_016577415.1	XM_016577415.1	PGAAIR	ribosomal protein S4	1919-1938	2.5	GO:0003677(DNA binding);GO:0005634(nucleus);GO:0005694(chromosome);GO:0005737(cytoplasm);GO:0006260(DNA replication);GO:0006284(base-excision repair);GO:0006302(double-strand break repair);GO:0006310(DNA recombination);GO:0009378(four-way junction helicase activity);GO:0032508(DNA duplex unwinding);GO:0043140(ATP-dependent 3'-5' DNA helicase activity)	ko03010(Ribosome)
osa-miR5793	XM_016577410.1	XM_016577410.1	PGAAIR	ribosomal protein S4	1919-1938	2.5	GO:0003677(DNA binding);GO:0005634(nucleus);GO:0005694(chromosome);GO:0005737(cytoplasm);GO:0006260(DNA replication);GO:0006284(base-excision repair);GO:0006302(double-strand break repair);GO:0006310(DNA recombination);GO:0009378(four-way junction helicase activity);GO:0032508(DNA duplex unwinding);GO:0043140(ATP-dependent 3'-5' DNA helicase activity)	ko03010(Ribosome)
osa-miR5793	XM_016577412.1	XM_016577412.1	PGAAIR	ribosomal protein S4	1919-1938	2.5	GO:0003677(DNA binding);GO:0005634(nucleus);GO:0005694(chromosome);GO:0005737(cytoplasm);GO:0006260(DNA replication);GO:0006284(base-excision repair);GO:0006302(double-strand break repair);GO:0006310(DNA recombination);GO:0009378(four-way junction helicase activity);GO:0032508(DNA duplex unwinding);GO:0043140(ATP-dependent 3'-5' DNA helicase activity)	ko03010(Ribosome)
osa-miR5793	XM_016577411.1	XM_016577411.1	PGAAIR	ribosomal protein S4	1919-1938	2.5	GO:0003677(DNA binding);GO:0005634(nucleus);GO:0005694(chromosome);GO:0005737(cytoplasm);GO:0006260(DNA replication);GO:0006284(base-excision repair);GO:0006302(double-strand break repair);GO:0006310(DNA recombination);GO:0009378(four-way junction helicase activity);GO:0032508(DNA duplex unwinding);GO:0043140(ATP-dependent 3'-5' DNA helicase activity)	ko03010(Ribosome)
osa-miR5796	XM_016607462.1	XM_016607462.1	HIPP37	-	950-970	2.5	GO:0005737(cytoplasm);GO:0030001(metal ion transport);GO:0046914(transition metal ion binding);GO:0046916(cellular transition metal ion homeostasis)
osa-miR5796	XM_016607463.1	XM_016607463.1	HIPP37	-	930-950	2.5	GO:0005737(cytoplasm);GO:0030001(metal ion transport);GO:0046914(transition metal ion binding);GO:0046916(cellular transition metal ion homeostasis)
osa-miR5796	XM_016594119.1	XM_016594119.1	-	-	121-141	2.2	GO:0005634(nucleus)
osa-miR5796	XM_016585519.1	XM_016585519.1	-	-	430-449	2	GO:0000783(nuclear telomere cap complex);GO:0003691(double-stranded telomeric DNA binding);GO:0031627(telomeric loop formation)
osa-miR5796	XM_016585521.1	XM_016585521.1	-	-	430-449	2	GO:0000783(nuclear telomere cap complex);GO:0003691(double-stranded telomeric DNA binding);GO:0031627(telomeric loop formation)
osa-miR5796	XM_016585520.1	XM_016585520.1	-	-	431-450	2	GO:0000783(nuclear telomere cap complex);GO:0003691(double-stranded telomeric DNA binding);GO:0031627(telomeric loop formation)
osa-miR5796	XM_016585522.1	XM_016585522.1	-	-	430-449	2	GO:0000783(nuclear telomere cap complex);GO:0003691(double-stranded telomeric DNA binding);GO:0031627(telomeric loop formation)
osa-miR5796	XM_016585523.1	XM_016585523.1	-	-	430-449	2	GO:0000783(nuclear telomere cap complex);GO:0003691(double-stranded telomeric DNA binding);GO:0031627(telomeric loop formation)
osa-miR5796	XM_016587551.1	XM_016587551.1	-	-	570-590	2.5	GO:0016787(hydrolase activity)
osa-miR5796	XM_016618454.1	XM_016618454.1	AGL62	mitochondrial inner membrane protein OXA1-like	444-464	2.5	GO:0003677(DNA binding);GO:0003700(transcription factor activity, sequence-specific DNA binding);GO:0005634(nucleus);GO:0006351(transcription, DNA-templated);GO:0006355(regulation of transcription, DNA-templated);GO:0009960(endosperm development);GO:0046983(protein dimerization activity)	ko03060(Protein export)
osa-miR5796	XM_016588875.1	XM_016588875.1	-	-	78-98	2.2	GO:0005634(nucleus)
osa-miR5796	XM_016621653.1	XM_016621653.1	-	-	535-555	2.5	GO:0016787(hydrolase activity)
osa-miR5818	XM_016577747.1	XM_016577747.1	ALA4	-	1176-1196	2.2	GO:0004012(phospholipid-translocating ATPase activity);GO:0005802(trans-Golgi network);GO:0005886(plasma membrane);GO:0048194(Golgi vesicle budding)
osa-miR5818	XM_016628468.1	XM_016628468.1	ALA4	-	4128-4148	2.5	GO:0004012(phospholipid-translocating ATPase activity);GO:0005802(trans-Golgi network);GO:0005886(plasma membrane);GO:0048194(Golgi vesicle budding)
osa-miR5818	XM_016631609.1	XM_016631609.1	ATL8	hypothetical protein	1013-1032	1.8	GO:0005634(nucleus);GO:0008270(zinc ion binding);GO:0016021(integral component of membrane);GO:0016567(protein ubiquitination)	ko04141(Protein processing in endoplasmic reticulum);ko04120(Ubiquitin mediated proteolysis)
sly-miR10533_L+1R+1_1ss17GA	XM_016607914.1	XM_016607914.1	R1B-16	putative late blight resistance protein homolog R1A-10	1062-1085	2	GO:0005524(ATP binding);GO:0005634(nucleus);GO:0005737(cytoplasm);GO:0005886(plasma membrane);GO:0006952(defense response);GO:0009626(plant-type hypersensitive response);GO:0009814(defense response, incompatible interaction);GO:0043531(ADP binding)	ko04626(Plant-pathogen interaction)
sly-miR10533_L+1R+1_1ss17GA	XM_016607928.1	XM_016607928.1	R1A-10	putative late blight resistance protein homolog R1B-14	2106-2129	2	GO:0005524(ATP binding);GO:0005575(cellular_component);GO:0006952(defense response);GO:0043531(ADP binding)	ko04626(Plant-pathogen interaction)
sly-miR10533_L+1R+1_1ss17GA	XM_016607932.1	XM_016607932.1	R1A-10	putative late blight resistance protein homolog R1B-14	2105-2128	2	GO:0005524(ATP binding);GO:0005575(cellular_component);GO:0006952(defense response);GO:0043531(ADP binding)	ko04626(Plant-pathogen interaction)
sly-miR10533_L+1R+1_1ss17GA	XM_016607934.1	XM_016607934.1	R1A-10	putative late blight resistance protein homolog R1B-14	2105-2128	2	GO:0005524(ATP binding);GO:0005575(cellular_component);GO:0006952(defense response);GO:0043531(ADP binding)	ko04626(Plant-pathogen interaction)
sly-miR10533_L+1R+1_1ss17GA	XM_016607933.1	XM_016607933.1	R1A-10	putative late blight resistance protein homolog R1B-14	2105-2128	2	GO:0005524(ATP binding);GO:0005575(cellular_component);GO:0006952(defense response);GO:0043531(ADP binding)	ko04626(Plant-pathogen interaction)
sly-miR10533_L+1R+1_1ss17GA	XM_016607931.1	XM_016607931.1	R1A-10	putative late blight resistance protein homolog R1B-14	2105-2128	2	GO:0005524(ATP binding);GO:0005575(cellular_component);GO:0006952(defense response);GO:0043531(ADP binding)	ko04626(Plant-pathogen interaction)
sly-miR10533_L+1R+1_1ss17GA	XM_016607929.1	XM_016607929.1	R1A-10	putative late blight resistance protein homolog R1B-14	2105-2128	2	GO:0005524(ATP binding);GO:0005575(cellular_component);GO:0006952(defense response);GO:0043531(ADP binding)	ko04626(Plant-pathogen interaction)
sly-miR10533_L+1R+1_1ss17GA	XM_016607924.1	XM_016607924.1	R1A-10	putative late blight resistance protein homolog R1B-14	2105-2128	2	GO:0005524(ATP binding);GO:0005575(cellular_component);GO:0006952(defense response);GO:0043531(ADP binding)	ko04626(Plant-pathogen interaction)
sly-miR10533_L+1R+1_1ss17GA	XM_016607925.1	XM_016607925.1	R1A-10	putative late blight resistance protein homolog R1B-14	2069-2092	2	GO:0005524(ATP binding);GO:0005575(cellular_component);GO:0006952(defense response);GO:0043531(ADP binding)	ko04626(Plant-pathogen interaction)
sly-miR10533_L+1R+1_1ss17GA	XM_016607926.1	XM_016607926.1	R1A-10	putative late blight resistance protein homolog R1B-14	2084-2107	2	GO:0005524(ATP binding);GO:0005575(cellular_component);GO:0006952(defense response);GO:0043531(ADP binding)	ko04626(Plant-pathogen interaction)
sly-miR10533_L+1R+1_1ss17GA	XM_016607927.1	XM_016607927.1	R1A-10	putative late blight resistance protein homolog R1B-14	2048-2071	2	GO:0005524(ATP binding);GO:0005575(cellular_component);GO:0006952(defense response);GO:0043531(ADP binding)	ko04626(Plant-pathogen interaction)
sly-miR10533_L+1R+1_1ss17GA	XM_016607939.1	XM_016607939.1	R1A-10	putative late blight resistance protein homolog R1B-14	1649-1672	2	GO:0005524(ATP binding);GO:0005575(cellular_component);GO:0006952(defense response);GO:0043531(ADP binding)	ko04626(Plant-pathogen interaction)
sly-miR10533_L+1R+1_1ss17GA	XM_016607937.1	XM_016607937.1	R1A-10	putative late blight resistance protein homolog R1B-14	1746-1769	2	GO:0005524(ATP binding);GO:0005575(cellular_component);GO:0006952(defense response);GO:0043531(ADP binding)	ko04626(Plant-pathogen interaction)
sly-miR10533_L+1R+1_1ss17GA	XM_016607938.1	XM_016607938.1	R1A-10	putative late blight resistance protein homolog R1B-14	1566-1589	2	GO:0005524(ATP binding);GO:0005575(cellular_component);GO:0006952(defense response);GO:0043531(ADP binding)	ko04626(Plant-pathogen interaction)
sly-miR10533_L+1R+1_1ss17GA	XM_016607936.1	XM_016607936.1	R1A-10	putative late blight resistance protein homolog R1B-14	1682-1705	2	GO:0005524(ATP binding);GO:0005575(cellular_component);GO:0006952(defense response);GO:0043531(ADP binding)	ko04626(Plant-pathogen interaction)
sly-miR10533_L+1R+1_1ss17GA	XM_016607935.1	XM_016607935.1	R1A-10	putative late blight resistance protein homolog R1B-14	1784-1807	2	GO:0005524(ATP binding);GO:0005575(cellular_component);GO:0006952(defense response);GO:0043531(ADP binding)	ko04626(Plant-pathogen interaction)
sly-miR10533_L+1R+1_1ss17GA	XM_016607912.1	XM_016607912.1	R1B-17	putative disease resistance RPP13-like protein 3	557-580	0.5	GO:0005515(protein binding);GO:0005524(ATP binding);GO:0005634(nucleus);GO:0006952(defense response);GO:0043531(ADP binding)	ko04626(Plant-pathogen interaction)
sly-miR10533_L+1R+1_1ss17GA	XM_016593553.1	XM_016593553.1	R1B-17	putative disease resistance RPP13-like protein 3	1232-1255	1	GO:0005524(ATP binding);GO:0005634(nucleus);GO:0005737(cytoplasm);GO:0005886(plasma membrane);GO:0006952(defense response);GO:0009626(plant-type hypersensitive response);GO:0009814(defense response, incompatible interaction);GO:0043531(ADP binding)	ko04626(Plant-pathogen interaction)
sly-miR10533_L+1R+1_1ss17GA	XM_016648492.1	XM_016648492.1	-	-	955-978	0.5	-
sly-miR10533_L+1R+1_1ss17GA	XM_016597824.1	XM_016597824.1	R1A-10	putative late blight resistance protein homolog R1B-14	1599-1622	1.5	GO:0005524(ATP binding);GO:0006952(defense response);GO:0043531(ADP binding)	ko04626(Plant-pathogen interaction)
sly-miR10533_L+1R+1_1ss17GA	XM_016597818.1	XM_016597818.1	R1A-10	putative late blight resistance protein homolog R1B-14	1599-1622	1.5	GO:0005524(ATP binding);GO:0006952(defense response);GO:0043531(ADP binding)	ko04626(Plant-pathogen interaction)
sly-miR10533_L+1R+1_1ss17GA	XM_016597826.1	XM_016597826.1	R1A-10	putative late blight resistance protein homolog R1B-14	1599-1622	1.5	GO:0005524(ATP binding);GO:0006952(defense response);GO:0043531(ADP binding)	ko04626(Plant-pathogen interaction)
sly-miR10533_L+1R+1_1ss17GA	XM_016597830.1	XM_016597830.1	R1A-10	putative late blight resistance protein homolog R1B-14	1599-1622	1.5	GO:0005524(ATP binding);GO:0006952(defense response);GO:0043531(ADP binding)	ko04626(Plant-pathogen interaction)
sly-miR10533_L+1R+1_1ss17GA	XM_016597817.1	XM_016597817.1	R1A-10	putative late blight resistance protein homolog R1B-14	1599-1622	1.5	GO:0005524(ATP binding);GO:0006952(defense response);GO:0043531(ADP binding)	ko04626(Plant-pathogen interaction)
sly-miR10533_L+1R+1_1ss17GA	XM_016597825.1	XM_016597825.1	R1A-10	putative late blight resistance protein homolog R1B-14	1599-1622	1.5	GO:0005524(ATP binding);GO:0006952(defense response);GO:0043531(ADP binding)	ko04626(Plant-pathogen interaction)
sly-miR10533_L+1R+1_1ss17GA	XM_016597829.1	XM_016597829.1	R1A-10	putative late blight resistance protein homolog R1B-14	1599-1622	1.5	GO:0005524(ATP binding);GO:0006952(defense response);GO:0043531(ADP binding)	ko04626(Plant-pathogen interaction)
sly-miR10533_L+1R+1_1ss17GA	XM_016597820.1	XM_016597820.1	R1A-10	putative late blight resistance protein homolog R1B-14	1599-1622	1.5	GO:0005524(ATP binding);GO:0006952(defense response);GO:0043531(ADP binding)	ko04626(Plant-pathogen interaction)
sly-miR10533_L+1R+1_1ss17GA	XM_016597827.1	XM_016597827.1	R1A-10	putative late blight resistance protein homolog R1B-14	1599-1622	1.5	GO:0005524(ATP binding);GO:0006952(defense response);GO:0043531(ADP binding)	ko04626(Plant-pathogen interaction)
sly-miR10533_L+1R+1_1ss17GA	XM_016597831.1	XM_016597831.1	R1A-10	putative late blight resistance protein homolog R1B-14	1599-1622	1.5	GO:0005524(ATP binding);GO:0006952(defense response);GO:0043531(ADP binding)	ko04626(Plant-pathogen interaction)
sly-miR10533_L+1R+1_1ss17GA	XM_016597828.1	XM_016597828.1	R1A-10	putative late blight resistance protein homolog R1B-14	1599-1622	1.5	GO:0005524(ATP binding);GO:0006952(defense response);GO:0043531(ADP binding)	ko04626(Plant-pathogen interaction)
sly-miR10533_L+1R+1_1ss17GA	XM_016597833.1	XM_016597833.1	R1A-10	putative late blight resistance protein homolog R1B-14	1626-1649	1.5	GO:0005524(ATP binding);GO:0006952(defense response);GO:0043531(ADP binding)	ko04626(Plant-pathogen interaction)
sly-miR10533_L+1R+1_1ss17GA	XM_016597810.1	XM_016597810.1	R1A-10	putative late blight resistance protein homolog R1B-14	1599-1622	1.5	GO:0005524(ATP binding);GO:0006952(defense response);GO:0043531(ADP binding)	ko04626(Plant-pathogen interaction)
sly-miR10533_L+1R+1_1ss17GA	XM_016597813.1	XM_016597813.1	R1A-10	putative late blight resistance protein homolog R1B-14	1599-1622	1.5	GO:0005524(ATP binding);GO:0006952(defense response);GO:0043531(ADP binding)	ko04626(Plant-pathogen interaction)
sly-miR10533_L+1R+1_1ss17GA	XM_016597815.1	XM_016597815.1	R1A-10	putative late blight resistance protein homolog R1B-14	1599-1622	1.5	GO:0005524(ATP binding);GO:0006952(defense response);GO:0043531(ADP binding)	ko04626(Plant-pathogen interaction)
sly-miR10533_L+1R+1_1ss17GA	XM_016597819.1	XM_016597819.1	R1A-10	putative late blight resistance protein homolog R1B-14	1599-1622	1.5	GO:0005524(ATP binding);GO:0006952(defense response);GO:0043531(ADP binding)	ko04626(Plant-pathogen interaction)
sly-miR10533_L+1R+1_1ss17GA	XM_016597811.1	XM_016597811.1	R1A-10	putative late blight resistance protein homolog R1B-14	1599-1622	1.5	GO:0005524(ATP binding);GO:0006952(defense response);GO:0043531(ADP binding)	ko04626(Plant-pathogen interaction)
sly-miR10533_L+1R+1_1ss17GA	XM_016597822.1	XM_016597822.1	R1A-10	putative late blight resistance protein homolog R1B-14	1599-1622	1.5	GO:0005524(ATP binding);GO:0006952(defense response);GO:0043531(ADP binding)	ko04626(Plant-pathogen interaction)
sly-miR10533_L+1R+1_1ss17GA	XM_016597823.1	XM_016597823.1	R1A-10	putative late blight resistance protein homolog R1B-14	1599-1622	1.5	GO:0005524(ATP binding);GO:0006952(defense response);GO:0043531(ADP binding)	ko04626(Plant-pathogen interaction)
sly-miR10533_L+1R+1_1ss17GA	XM_016597814.1	XM_016597814.1	R1A-10	putative late blight resistance protein homolog R1B-14	1599-1622	1.5	GO:0005524(ATP binding);GO:0006952(defense response);GO:0043531(ADP binding)	ko04626(Plant-pathogen interaction)
sly-miR10533_L+1R+1_1ss17GA	XM_016597812.1	XM_016597812.1	R1A-10	putative late blight resistance protein homolog R1B-14	1599-1622	1.5	GO:0005524(ATP binding);GO:0006952(defense response);GO:0043531(ADP binding)	ko04626(Plant-pathogen interaction)
sly-miR10533_L+1R+1_1ss17GA	XM_016597816.1	XM_016597816.1	R1A-10	putative late blight resistance protein homolog R1B-14	1599-1622	1.5	GO:0005524(ATP binding);GO:0006952(defense response);GO:0043531(ADP binding)	ko04626(Plant-pathogen interaction)
sly-miR10533_L+1R+1_1ss17GA	XM_016597832.1	XM_016597832.1	R1A-10	putative late blight resistance protein homolog R1B-14	1475-1498	1.5	GO:0005524(ATP binding);GO:0006952(defense response);GO:0043531(ADP binding)	ko04626(Plant-pathogen interaction)
sly-miR10533_L+1R+1_1ss17GA	XM_016597838.1	XM_016597838.1	R1B-16	putative late blight resistance protein homolog R1A-10	1482-1505	1	GO:0005524(ATP binding);GO:0006952(defense response);GO:0043531(ADP binding)	ko04626(Plant-pathogen interaction)
sly-miR10533_L+1R+1_1ss17GA	XM_016597837.1	XM_016597837.1	R1B-16	putative late blight resistance protein homolog R1A-10	1525-1548	1	GO:0005524(ATP binding);GO:0006952(defense response);GO:0043531(ADP binding)	ko04626(Plant-pathogen interaction)
sly-miR10533_L+1R+1_1ss17GA	XM_016597839.1	XM_016597839.1	R1B-16	putative late blight resistance protein homolog R1A-10	1421-1444	1	GO:0005524(ATP binding);GO:0006952(defense response);GO:0043531(ADP binding)	ko04626(Plant-pathogen interaction)
sly-miR10533_L+1R+1_1ss17GA	XM_016597835.1	XM_016597835.1	R1B-16	putative late blight resistance protein homolog R1A-10	2936-2959	1	GO:0005524(ATP binding);GO:0006952(defense response);GO:0043531(ADP binding)	ko04626(Plant-pathogen interaction)
sly-miR10533_L+1R+1_1ss17GA	XM_016597834.1	XM_016597834.1	R1B-16	putative late blight resistance protein homolog R1A-10	2936-2959	1	GO:0005524(ATP binding);GO:0006952(defense response);GO:0043531(ADP binding)	ko04626(Plant-pathogen interaction)
sly-miR10533_L+1R+1_1ss17GA	XM_016582882.1	XM_016582882.1	R1A-10	probable disease resistance protein RF9	83-106	2.5	GO:0005524(ATP binding);GO:0005634(nucleus);GO:0005737(cytoplasm);GO:0005886(plasma membrane);GO:0006952(defense response);GO:0009626(plant-type hypersensitive response);GO:0009814(defense response, incompatible interaction);GO:0043531(ADP binding)	ko04626(Plant-pathogen interaction)
sly-miR10533_L+1R+1_1ss17GA	XM_016599875.1	XM_016599875.1	R1B-16	putative late blight resistance protein homolog R1B-14	1511-1534	2.5	GO:0000166(nucleotide binding);GO:0002230(positive regulation of defense response to virus by host);GO:0002239(response to oomycetes);GO:0005515(protein binding);GO:0005524(ATP binding);GO:0005886(plasma membrane);GO:0006952(defense response);GO:0009416(response to light stimulus);GO:0009611(response to wounding);GO:0009626(plant-type hypersensitive response);GO:0009637(response to blue light);GO…	ko04626(Plant-pathogen interaction)
sly-miR10533_L+1R+1_1ss17GA	XM_016599874.1	XM_016599874.1	R1B-16	putative late blight resistance protein homolog R1B-14	1545-1568	2.5	GO:0000166(nucleotide binding);GO:0002230(positive regulation of defense response to virus by host);GO:0002239(response to oomycetes);GO:0005515(protein binding);GO:0005524(ATP binding);GO:0005886(plasma membrane);GO:0006952(defense response);GO:0009416(response to light stimulus);GO:0009611(response to wounding);GO:0009626(plant-type hypersensitive response);GO:0009637(response to blue light);GO…	ko04626(Plant-pathogen interaction)
sly-miR10533_L+1R+1_1ss17GA	XM_016599876.1	XM_016599876.1	R1B-17	putative late blight resistance protein homolog R1B-14	1545-1568	2.5	GO:0000166(nucleotide binding);GO:0002230(positive regulation of defense response to virus by host);GO:0002239(response to oomycetes);GO:0005515(protein binding);GO:0005524(ATP binding);GO:0005886(plasma membrane);GO:0006952(defense response);GO:0009416(response to light stimulus);GO:0009611(response to wounding);GO:0009626(plant-type hypersensitive response);GO:0009637(response to blue light);GO…	ko04626(Plant-pathogen interaction)
sly-miR10533_L+1R+1_1ss17GA	XM_016653627.1	XM_016653627.1	R1B-12	putative late blight resistance protein homolog R1B-14	2729-2753	1	GO:0005524(ATP binding);GO:0006952(defense response);GO:0009506(plasmodesma);GO:0043531(ADP binding)	ko04626(Plant-pathogen interaction)
sly-miR10533_L+1R+1_1ss17GA	XM_016653628.1	XM_016653628.1	R1B-12	putative late blight resistance protein homolog R1B-14	2755-2779	1	GO:0005524(ATP binding);GO:0006952(defense response);GO:0009506(plasmodesma);GO:0043531(ADP binding)	ko04626(Plant-pathogen interaction)
sly-miR10533_L+1R+1_1ss17GA	XM_016586835.1	XM_016586835.1	R1B-17	putative disease resistance RPP13-like protein 3	1195-1218	1	GO:0005524(ATP binding);GO:0005634(nucleus);GO:0005737(cytoplasm);GO:0005886(plasma membrane);GO:0006952(defense response);GO:0009626(plant-type hypersensitive response);GO:0009814(defense response, incompatible interaction);GO:0043531(ADP binding)	ko04626(Plant-pathogen interaction)
sly-miR10533_L+1R+1_1ss17GA	XM_016586833.1	XM_016586833.1	R1B-17	putative disease resistance RPP13-like protein 3	1226-1249	1	GO:0005524(ATP binding);GO:0005634(nucleus);GO:0005737(cytoplasm);GO:0005886(plasma membrane);GO:0006952(defense response);GO:0009626(plant-type hypersensitive response);GO:0009814(defense response, incompatible interaction);GO:0043531(ADP binding)	ko04626(Plant-pathogen interaction)
sly-miR10533_L+1R+1_1ss17GA	XM_016586840.1	XM_016586840.1	R1B-16	putative late blight resistance protein homolog R1A-10	1625-1648	0	GO:0005524(ATP binding);GO:0005575(cellular_component);GO:0006952(defense response);GO:0043531(ADP binding)	ko04626(Plant-pathogen interaction)
sly-miR10533_L+1R+1_1ss17GA	XM_016586838.1	XM_016586838.1	R1B-16	putative late blight resistance protein homolog R1A-10	1784-1807	0	GO:0005524(ATP binding);GO:0005575(cellular_component);GO:0006952(defense response);GO:0043531(ADP binding)	ko04626(Plant-pathogen interaction)
sly-miR10533_L+1R+1_1ss17GA	XM_016586841.1	XM_016586841.1	R1B-16	putative late blight resistance protein homolog R1A-10	1682-1705	0	GO:0005524(ATP binding);GO:0005575(cellular_component);GO:0006952(defense response);GO:0043531(ADP binding)	ko04626(Plant-pathogen interaction)
sly-miR10533_L+1R+1_1ss17GA	XM_016586839.1	XM_016586839.1	R1B-16	putative late blight resistance protein homolog R1A-10	1812-1835	0	GO:0000166(nucleotide binding);GO:0002230(positive regulation of defense response to virus by host);GO:0002239(response to oomycetes);GO:0005515(protein binding);GO:0005524(ATP binding);GO:0005886(plasma membrane);GO:0006952(defense response);GO:0009416(response to light stimulus);GO:0009611(response to wounding);GO:0009626(plant-type hypersensitive response);GO:0009637(response to blue light);GO…	ko04626(Plant-pathogen interaction)
sly-miR10533_L+1R+1_1ss17GA	XM_016586836.1	XM_016586836.1	R1B-16	putative late blight resistance protein homolog R1A-10	1812-1835	0	GO:0005524(ATP binding);GO:0005575(cellular_component);GO:0006952(defense response);GO:0043531(ADP binding)	ko04626(Plant-pathogen interaction)
sly-miR10533_L+1R+1_1ss17GA	XM_016586837.1	XM_016586837.1	R1B-16	putative late blight resistance protein homolog R1A-10	1834-1857	0	GO:0005524(ATP binding);GO:0005575(cellular_component);GO:0006952(defense response);GO:0043531(ADP binding)	ko04626(Plant-pathogen interaction)
sly-miR10533_L+1R+1_1ss17GA	XM_016586843.1	XM_016586843.1	R1B-16	putative late blight resistance protein homolog R1A-10	3484-3507	0	GO:0005524(ATP binding);GO:0005575(cellular_component);GO:0006952(defense response);GO:0043531(ADP binding)	ko04626(Plant-pathogen interaction)
sly-miR10533_L+1R+1_1ss17GA	XM_016586842.1	XM_016586842.1	R1B-16	putative late blight resistance protein homolog R1A-10	3696-3719	0	GO:0005524(ATP binding);GO:0005575(cellular_component);GO:0006952(defense response);GO:0043531(ADP binding)	ko04626(Plant-pathogen interaction)
sly-miR10533_L+1R+1_1ss17GA	XM_016586845.1	XM_016586845.1	R1B-16	putative late blight resistance protein homolog R1A-10	4012-4035	0	GO:0005524(ATP binding);GO:0005575(cellular_component);GO:0006952(defense response);GO:0043531(ADP binding)	ko04626(Plant-pathogen interaction)
sly-miR10533_L+1R+1_1ss17GA	XM_016586846.1	XM_016586846.1	R1B-16	putative late blight resistance protein homolog R1A-10	3686-3709	0	GO:0005524(ATP binding);GO:0005575(cellular_component);GO:0006952(defense response);GO:0043531(ADP binding)	ko04626(Plant-pathogen interaction)
sly-miR10533_L+1R+1_1ss17GA	XM_016586844.1	XM_016586844.1	R1B-16	putative late blight resistance protein homolog R1A-10	3849-3872	0	GO:0005524(ATP binding);GO:0005575(cellular_component);GO:0006952(defense response);GO:0043531(ADP binding)	ko04626(Plant-pathogen interaction)
sly-miR10533_L+1R+1_1ss17GA	XM_016634444.1	XM_016634444.1	R1A-10	putative late blight resistance protein homolog R1A-10	1917-1940	1	GO:0005524(ATP binding);GO:0005575(cellular_component);GO:0006952(defense response);GO:0043531(ADP binding)	ko04626(Plant-pathogen interaction)
sly-miR10533_L+1R+1_1ss17GA	XM_016634442.1	XM_016634442.1	R1A-10	putative late blight resistance protein homolog R1A-10	3520-3543	1	GO:0005524(ATP binding);GO:0005575(cellular_component);GO:0006952(defense response);GO:0043531(ADP binding)	ko04626(Plant-pathogen interaction)
sly-miR10533_L+1R+1_1ss17GA	XM_016634438.1	XM_016634438.1	R1A-10	putative late blight resistance protein homolog R1A-10	3510-3533	1	GO:0005524(ATP binding);GO:0005575(cellular_component);GO:0006952(defense response);GO:0043531(ADP binding)	ko04626(Plant-pathogen interaction)
sly-miR10533_L+1R+1_1ss17GA	XM_016634441.1	XM_016634441.1	R1A-10	putative late blight resistance protein homolog R1A-10	2688-2711	1	GO:0005524(ATP binding);GO:0005575(cellular_component);GO:0006952(defense response);GO:0043531(ADP binding)	ko04626(Plant-pathogen interaction)
sly-miR10533_L+1R+1_1ss17GA	XM_016634440.1	XM_016634440.1	R1A-10	putative late blight resistance protein homolog R1A-10	2823-2846	1	GO:0005524(ATP binding);GO:0005575(cellular_component);GO:0006952(defense response);GO:0043531(ADP binding)	ko04626(Plant-pathogen interaction)
sly-miR10533_L+1R+1_1ss17GA	XM_016634439.1	XM_016634439.1	R1A-10	putative late blight resistance protein homolog R1A-10	2887-2910	1	GO:0005524(ATP binding);GO:0005575(cellular_component);GO:0006952(defense response);GO:0043531(ADP binding)	ko04626(Plant-pathogen interaction)
sly-miR10533_L+1R+1_1ss17GA	XM_016634437.1	XM_016634437.1	R1A-10	putative late blight resistance protein homolog R1A-10	3384-3407	1	GO:0005524(ATP binding);GO:0005575(cellular_component);GO:0006952(defense response);GO:0043531(ADP binding)	ko04626(Plant-pathogen interaction)
sly-miR10533_L+1R+1_1ss17GA	XM_016634435.1	XM_016634435.1	R1A-10	putative late blight resistance protein homolog R1A-10	3522-3545	1	GO:0005524(ATP binding);GO:0005575(cellular_component);GO:0006952(defense response);GO:0043531(ADP binding)	ko04626(Plant-pathogen interaction)
sly-miR10533_L+1R+1_1ss17GA	XM_016634443.1	XM_016634443.1	R1A-10	putative late blight resistance protein homolog R1A-10	3418-3441	1	GO:0005524(ATP binding);GO:0005575(cellular_component);GO:0006952(defense response);GO:0043531(ADP binding)	ko04626(Plant-pathogen interaction)
sly-miR10533_L+1R+1_1ss17GA	XM_016634445.1	XM_016634445.1	R1A-10	putative late blight resistance protein homolog R1A-10	2766-2789	1	GO:0005524(ATP binding);GO:0005575(cellular_component);GO:0006952(defense response);GO:0043531(ADP binding)	ko04626(Plant-pathogen interaction)
sly-miR10533_L+1R+1_1ss17GA	XM_016634450.1	XM_016634450.1	R1A-4	putative late blight resistance protein homolog R1B-14	1563-1586	0	GO:0005524(ATP binding);GO:0005634(nucleus);GO:0005737(cytoplasm);GO:0005886(plasma membrane);GO:0006952(defense response);GO:0009626(plant-type hypersensitive response);GO:0009814(defense response, incompatible interaction);GO:0043531(ADP binding)	ko04626(Plant-pathogen interaction)
sly-miR10533_L+1R+1_1ss17GA	XM_016634447.1	XM_016634447.1	R1A-4	putative late blight resistance protein homolog R1B-14	1854-1877	0	GO:0005524(ATP binding);GO:0005634(nucleus);GO:0005737(cytoplasm);GO:0005886(plasma membrane);GO:0006952(defense response);GO:0009626(plant-type hypersensitive response);GO:0009814(defense response, incompatible interaction);GO:0043531(ADP binding)	ko04626(Plant-pathogen interaction)
sly-miR10533_L+1R+1_1ss17GA	XM_016634448.1	XM_016634448.1	R1A-4	putative late blight resistance protein homolog R1B-14	2026-2049	0	GO:0005524(ATP binding);GO:0005634(nucleus);GO:0005737(cytoplasm);GO:0005886(plasma membrane);GO:0006952(defense response);GO:0009626(plant-type hypersensitive response);GO:0009814(defense response, incompatible interaction);GO:0043531(ADP binding)	ko04626(Plant-pathogen interaction)
sly-miR10533_L+1R+1_1ss17GA	XM_016634449.1	XM_016634449.1	R1A-4	putative late blight resistance protein homolog R1B-14	2072-2095	0	GO:0005524(ATP binding);GO:0005634(nucleus);GO:0005737(cytoplasm);GO:0005886(plasma membrane);GO:0006952(defense response);GO:0009626(plant-type hypersensitive response);GO:0009814(defense response, incompatible interaction);GO:0043531(ADP binding)	ko04626(Plant-pathogen interaction)
sly-miR10533_L+1R+1_1ss17GA	XM_016634446.1	XM_016634446.1	R1A-4	putative late blight resistance protein homolog R1B-14	1785-1808	0	GO:0005524(ATP binding);GO:0005634(nucleus);GO:0005737(cytoplasm);GO:0005886(plasma membrane);GO:0006952(defense response);GO:0009626(plant-type hypersensitive response);GO:0009814(defense response, incompatible interaction);GO:0043531(ADP binding)	ko04626(Plant-pathogen interaction)
sly-miR10533_L+1R+1_1ss17GA	XM_016634452.1	XM_016634452.1	R1A-4	putative late blight resistance protein homolog R1B-14	1313-1336	0	GO:0005524(ATP binding);GO:0005634(nucleus);GO:0005737(cytoplasm);GO:0005886(plasma membrane);GO:0006952(defense response);GO:0009626(plant-type hypersensitive response);GO:0009814(defense response, incompatible interaction);GO:0043531(ADP binding)	ko04626(Plant-pathogen interaction)
sly-miR10533_L+1R+1_1ss17GA	XM_016590366.1	XM_016590366.1	R1A-10	probable disease resistance protein RF9	1597-1620	1.5	GO:0005524(ATP binding);GO:0006952(defense response);GO:0043531(ADP binding)	ko04626(Plant-pathogen interaction)
sly-miR10533_L+1R+1_1ss17GA	XM_016590367.1	XM_016590367.1	R1A-10	probable disease resistance protein RF9	1473-1496	1.5	GO:0005524(ATP binding);GO:0006952(defense response);GO:0043531(ADP binding)	ko04626(Plant-pathogen interaction)
sly-miR10533_L+1R+1_1ss17GA	XM_016590365.1	XM_016590365.1	R1A-10	probable disease resistance protein RF9	1596-1619	1.5	GO:0005524(ATP binding);GO:0006952(defense response);GO:0043531(ADP binding)	ko04626(Plant-pathogen interaction)
sly-miR10533_L+1R+1_1ss17GA	XM_016590368.1	XM_016590368.1	R1C-3	putative late blight resistance protein homolog R1B-14	1516-1539	1	GO:0005524(ATP binding);GO:0006952(defense response);GO:0043531(ADP binding)	ko04626(Plant-pathogen interaction)

## Sheet: Unique known miRNAs in Control
Target genes annotation of unique known miRNAs in Control.
miRNA ID	Transcript ID	Gene ID	Symbol	Gene annotation	Range	Score	GO	KEGG
hbr-MIR6173-p3_2ss18GA19CG	XM_016577018.1	XM_016577018.1	-	uncharacterized LOC106377927	353-371	2.5	-	ko00190(Oxidative phosphorylation)
hbr-MIR6173-p3_2ss18GA19CG	XM_016597628.1	XM_016597628.1	-	uncharacterized LOC103646289	549-567	2.2	GO:0005576(extracellular region);GO:0005783(endoplasmic reticulum);GO:0006869(lipid transport);GO:0008289(lipid binding);GO:0009506(plasmodesma)	ko03010(Ribosome)
hbr-MIR6173-p3_2ss18GA19CG	XM_016614717.1	XM_016614717.1	sec61a	protein transport protein Sec61 subunit alpha-like	1018-1036	2.5	GO:0005794(Golgi apparatus);GO:0009306(protein secretion);GO:0015031(protein transport);GO:0015450(P-P-bond-hydrolysis-driven protein transmembrane transporter activity);GO:0016020(membrane);GO:0016021(integral component of membrane)	ko03060(Protein export);ko04141(Protein processing in endoplasmic reticulum);ko04145(Phagosome)
hbr-MIR6173-p3_2ss18GA19CG	XM_016614716.1	XM_016614716.1	sec61a	protein transport protein Sec61 subunit alpha-like	1033-1051	2.5	GO:0005794(Golgi apparatus);GO:0009306(protein secretion);GO:0015031(protein transport);GO:0015450(P-P-bond-hydrolysis-driven protein transmembrane transporter activity);GO:0016020(membrane);GO:0016021(integral component of membrane)	ko03060(Protein export);ko04141(Protein processing in endoplasmic reticulum);ko04145(Phagosome)
hbr-MIR6173-p3_2ss18GA19CG	XM_016580584.1	XM_016580584.1	PPC1	phosphoenolpyruvate carboxylase-like	3275-3293	2.5	GO:0005829(cytosol);GO:0008964(phosphoenolpyruvate carboxylase activity);GO:0009507(chloroplast);GO:0048046(apoplast);GO:0048366(leaf development)	ko01200(Carbon metabolism);ko00620(Pyruvate metabolism);ko00710(Carbon fixation in photosynthetic organisms)
hbr-MIR6173-p3_2ss18GA19CG	XM_016636994.1	XM_016636994.1	LPA2	-	506-523	2.5	GO:0009507(chloroplast);GO:0009534(chloroplast thylakoid);GO:0009535(chloroplast thylakoid membrane);GO:0010207(photosystem II assembly);GO:0016021(integral component of membrane);GO:0042651(thylakoid membrane)
hbr-MIR6173-p3_2ss18GA19CG	XM_016633059.1	XM_016633059.1	RAP2-11	enolase 1	100-118	1	GO:0000302(response to reactive oxygen species);GO:0003677(DNA binding);GO:0003700(transcription factor activity, sequence-specific DNA binding);GO:0005634(nucleus);GO:0006351(transcription, DNA-templated);GO:0006355(regulation of transcription, DNA-templated);GO:0009723(response to ethylene);GO:0009873(ethylene-activated signaling pathway);GO:0035865(cellular response to potassium ion);GO:004356…	ko01200(Carbon metabolism);ko01230(Biosynthesis of amino acids);ko00010(Glycolysis / Gluconeogenesis);ko03018(RNA degradation)
hbr-MIR6173-p3_2ss18GA19CG	XM_016641135.1	XM_016641135.1	LPA2	-	504-521	2.5	GO:0009507(chloroplast);GO:0009534(chloroplast thylakoid);GO:0009535(chloroplast thylakoid membrane);GO:0010207(photosystem II assembly);GO:0016021(integral component of membrane);GO:0042651(thylakoid membrane)
hbr-MIR6173-p3_2ss18GA19CG	XM_016656925.1	XM_016656925.1	URH1	uridine nucleosidase 1-like	997-1015	2.5	GO:0005829(cytosol);GO:0006152(purine nucleoside catabolic process);GO:0008477(purine nucleosidase activity)	ko00240(Pyrimidine metabolism);ko00760(Nicotinate and nicotinamide metabolism)
hbr-MIR6173-p3_2ss18GA19CG	XM_016619164.1	XM_016619164.1	PGRL1A	-	857-874	2.2	GO:0005515(protein binding);GO:0009507(chloroplast);GO:0009534(chloroplast thylakoid);GO:0009535(chloroplast thylakoid membrane);GO:0009579(thylakoid);GO:0009773(photosynthetic electron transport in photosystem I);GO:0015979(photosynthesis);GO:0016021(integral component of membrane);GO:0016730(oxidoreductase activity, acting on iron-sulfur proteins as donors);GO:0042802(identical protein binding)
hbr-MIR6173-p3_2ss18GA19CG	XM_016637246.1	XM_016637246.1	-	-	98-115	2	GO:0003674(molecular_function);GO:0005680(anaphase-promoting complex);GO:0008150(biological_process);GO:0009507(chloroplast);GO:0090266(regulation of mitotic cell cycle spindle assembly checkpoint)
ptc-miR171e_R+2_1ss21CT	XM_016577663.1	XM_016577663.1	SCL15	DELLA protein GAI1-like	880-902	2	GO:0003700(transcription factor activity, sequence-specific DNA binding);GO:0005634(nucleus);GO:0006355(regulation of transcription, DNA-templated);GO:0030154(cell differentiation);GO:0043565(sequence-specific DNA binding);GO:0048831(regulation of shoot system development)	ko04075(Plant hormone signal transduction)
ptc-miR171e_R+2_1ss21CT	XM_016625781.1	XM_016625781.1	SCL6	DELLA protein GAI-like	1708-1730	1.2	GO:0003700(transcription factor activity, sequence-specific DNA binding);GO:0005634(nucleus);GO:0006355(regulation of transcription, DNA-templated);GO:0010492(maintenance of shoot apical meristem identity);GO:0043565(sequence-specific DNA binding);GO:0048768(root hair cell tip growth);GO:0051301(cell division)	ko04075(Plant hormone signal transduction)
ptc-miR171e_R+2_1ss21CT	XM_016625782.1	XM_016625782.1	SCL6	DELLA protein GAI-like	1698-1720	1.2	GO:0003700(transcription factor activity, sequence-specific DNA binding);GO:0005634(nucleus);GO:0006355(regulation of transcription, DNA-templated);GO:0010492(maintenance of shoot apical meristem identity);GO:0043565(sequence-specific DNA binding);GO:0048768(root hair cell tip growth);GO:0051301(cell division)	ko04075(Plant hormone signal transduction)
ptc-miR171e_R+2_1ss21CT	XM_016588934.1	XM_016588934.1	SCL15	hypothetical protein	893-915	2	GO:0003700(transcription factor activity, sequence-specific DNA binding);GO:0005634(nucleus);GO:0006355(regulation of transcription, DNA-templated);GO:0030154(cell differentiation);GO:0043565(sequence-specific DNA binding);GO:0048831(regulation of shoot system development)	ko04075(Plant hormone signal transduction)
ptc-miR171e_R+2_1ss21CT	XM_016582020.1	XM_016582020.1	SCL6	DELLA protein RGL2	1384-1407	1.2	GO:0003700(transcription factor activity, sequence-specific DNA binding);GO:0005634(nucleus);GO:0006355(regulation of transcription, DNA-templated);GO:0030154(cell differentiation);GO:0043565(sequence-specific DNA binding)	ko04075(Plant hormone signal transduction)
ptc-miR171e_R+2_1ss21CT	XM_016582022.1	XM_016582022.1	SCL6	DELLA protein RGL2	1300-1323	1.2	GO:0003700(transcription factor activity, sequence-specific DNA binding);GO:0005634(nucleus);GO:0006355(regulation of transcription, DNA-templated);GO:0030154(cell differentiation);GO:0043565(sequence-specific DNA binding)	ko04075(Plant hormone signal transduction)
ptc-miR171e_R+2_1ss21CT	XM_016582024.1	XM_016582024.1	SCL6	DELLA protein RGL2	1055-1078	1.2	GO:0003700(transcription factor activity, sequence-specific DNA binding);GO:0005634(nucleus);GO:0006355(regulation of transcription, DNA-templated);GO:0030154(cell differentiation);GO:0043565(sequence-specific DNA binding)	ko04075(Plant hormone signal transduction)
ptc-miR171e_R+2_1ss21CT	XM_016582023.1	XM_016582023.1	SCL6	DELLA protein RGL2	1223-1246	1.2	GO:0003700(transcription factor activity, sequence-specific DNA binding);GO:0005634(nucleus);GO:0006355(regulation of transcription, DNA-templated);GO:0030154(cell differentiation);GO:0043565(sequence-specific DNA binding)	ko04075(Plant hormone signal transduction)
ptc-miR171e_R+2_1ss21CT	XM_016582267.1	XM_016582267.1	ABCC10	ABC transporter C family member 10-like	4034-4056	2.2	GO:0005524(ATP binding);GO:0005774(vacuolar membrane);GO:0005886(plasma membrane);GO:0008559(xenobiotic-transporting ATPase activity);GO:0016021(integral component of membrane);GO:0042626(ATPase activity, coupled to transmembrane movement of substances)	ko02010(ABC transporters)
ptc-miR171e_R+2_1ss21CT	XM_016582268.1	XM_016582268.1	ABCC10	ABC transporter C family member 10-like	4026-4048	2.2	GO:0005524(ATP binding);GO:0005774(vacuolar membrane);GO:0005886(plasma membrane);GO:0008559(xenobiotic-transporting ATPase activity);GO:0016021(integral component of membrane);GO:0042626(ATPase activity, coupled to transmembrane movement of substances)	ko02010(ABC transporters)
ptc-miR171e_R+2_1ss21CT	XM_016631827.1	XM_016631827.1	SCL6	DELLA protein RGL2	1373-1396	1.2	GO:0003700(transcription factor activity, sequence-specific DNA binding);GO:0005634(nucleus);GO:0006355(regulation of transcription, DNA-templated);GO:0030154(cell differentiation);GO:0043565(sequence-specific DNA binding)	ko04075(Plant hormone signal transduction)
ptc-miR171e_R+2_1ss21CT	XM_016631828.1	XM_016631828.1	SCL6	DELLA protein RGL2	1223-1246	1.2	GO:0003700(transcription factor activity, sequence-specific DNA binding);GO:0005634(nucleus);GO:0006355(regulation of transcription, DNA-templated);GO:0030154(cell differentiation);GO:0043565(sequence-specific DNA binding)	ko04075(Plant hormone signal transduction)
ptc-miR171e_R+2_1ss21CT	XM_016635528.1	XM_016635528.1	SCL6	hypothetical protein	1684-1706	1.2	GO:0003700(transcription factor activity, sequence-specific DNA binding);GO:0005634(nucleus);GO:0006355(regulation of transcription, DNA-templated);GO:0010492(maintenance of shoot apical meristem identity);GO:0043565(sequence-specific DNA binding);GO:0048768(root hair cell tip growth);GO:0051301(cell division)	ko04075(Plant hormone signal transduction)
ptc-miR171e_R+2_1ss21CT	XM_016635712.1	XM_016635712.1	ABCC10	ABC transporter C family member 10-like	4070-4092	2.5	GO:0005524(ATP binding);GO:0005774(vacuolar membrane);GO:0005886(plasma membrane);GO:0008559(xenobiotic-transporting ATPase activity);GO:0016021(integral component of membrane);GO:0042626(ATPase activity, coupled to transmembrane movement of substances)	ko02010(ABC transporters)
ptc-miR171e_R+2_1ss21CT	XM_016635713.1	XM_016635713.1	ABCC10	ABC transporter C family member 10-like	4079-4101	2.5	GO:0005524(ATP binding);GO:0005774(vacuolar membrane);GO:0005886(plasma membrane);GO:0008559(xenobiotic-transporting ATPase activity);GO:0016021(integral component of membrane);GO:0042626(ATPase activity, coupled to transmembrane movement of substances)	ko02010(ABC transporters)
hbr-MIR6173-p3_1	XM_016604857.1	XM_016604857.1	MtrDRAFT_AC149210g4v1	hypothetical protein	220-239	2.5	GO:0000790(nuclear chromatin);GO:0003677(DNA binding);GO:0006342(chromatin silencing)	ko04070(Phosphatidylinositol signaling system);ko04626(Plant-pathogen interaction)
vvi-MIR156h-p5_2ss13GT22TC	XM_016624015.1	XM_016624015.1	RPL35	60S ribosomal protein L35-like	557-577	2.5	GO:0000463(maturation of LSU-rRNA from tricistronic rRNA transcript );GO:0003729(mRNA binding);GO:0003735(structural constituent of ribosome);GO:0006412(translation);GO:0022625(cytosolic large ribosomal subunit)	ko03010(Ribosome)
vvi-MIR156h-p5_2ss13GT22TC	XM_016649207.1	XM_016649207.1	SPL12	-	1488-1509	2.5	GO:0003677(DNA binding);GO:0003700(transcription factor activity, sequence-specific DNA binding);GO:0005634(nucleus);GO:0006351(transcription, DNA-templated);GO:0006355(regulation of transcription, DNA-templated);GO:0044212(transcription regulatory region DNA binding);GO:0046872(metal ion binding);GO:0048510(regulation of timing of transition from vegetative to reproductive phase);GO:0048653(anth…
vvi-MIR156h-p5_2ss13GT22TC	XM_016649220.1	XM_016649220.1	SPL12	-	1487-1508	2.5	GO:0003677(DNA binding);GO:0003700(transcription factor activity, sequence-specific DNA binding);GO:0005634(nucleus);GO:0006351(transcription, DNA-templated);GO:0006355(regulation of transcription, DNA-templated);GO:0044212(transcription regulatory region DNA binding);GO:0046872(metal ion binding);GO:0048510(regulation of timing of transition from vegetative to reproductive phase);GO:0048653(anth…
vvi-MIR156h-p5_2ss13GT22TC	XM_016649213.1	XM_016649213.1	SPL12	-	1520-1541	2.5	GO:0003677(DNA binding);GO:0003700(transcription factor activity, sequence-specific DNA binding);GO:0005634(nucleus);GO:0006351(transcription, DNA-templated);GO:0006355(regulation of transcription, DNA-templated);GO:0044212(transcription regulatory region DNA binding);GO:0046872(metal ion binding);GO:0048510(regulation of timing of transition from vegetative to reproductive phase);GO:0048653(anth…
vvi-MIR156h-p5_2ss13GT22TC	XM_016649198.1	XM_016649198.1	SPL12	-	1482-1503	2.5	GO:0003677(DNA binding);GO:0003700(transcription factor activity, sequence-specific DNA binding);GO:0005634(nucleus);GO:0006351(transcription, DNA-templated);GO:0006355(regulation of transcription, DNA-templated);GO:0044212(transcription regulatory region DNA binding);GO:0046872(metal ion binding);GO:0048510(regulation of timing of transition from vegetative to reproductive phase);GO:0048653(anth…
vvi-MIR156h-p5_2ss13GT22TC	XM_016649225.1	XM_016649225.1	SPL12	-	1450-1471	2.5	GO:0003677(DNA binding);GO:0003700(transcription factor activity, sequence-specific DNA binding);GO:0005634(nucleus);GO:0006351(transcription, DNA-templated);GO:0006355(regulation of transcription, DNA-templated);GO:0044212(transcription regulatory region DNA binding);GO:0046872(metal ion binding);GO:0048510(regulation of timing of transition from vegetative to reproductive phase);GO:0048653(anth…
vvi-MIR156h-p5_2ss13GT22TC	XM_016578495.1	XM_016578495.1	-	-	620-640	2	GO:0005516(calmodulin binding);GO:0005576(extracellular region);GO:0005886(plasma membrane);GO:0006869(lipid transport);GO:0008289(lipid binding);GO:0009505(plant-type cell wall);GO:0009534(chloroplast thylakoid);GO:0048046(apoplast);GO:0071555(cell wall organization)
vvi-MIR156h-p5_2ss13GT22TC	XM_016594406.1	XM_016594406.1	SPL6	-	1606-1627	1.5	GO:0003677(DNA binding);GO:0003700(transcription factor activity, sequence-specific DNA binding);GO:0005634(nucleus);GO:0006351(transcription, DNA-templated);GO:0006355(regulation of transcription, DNA-templated);GO:0010468(regulation of gene expression);GO:0042742(defense response to bacterium);GO:0046872(metal ion binding)
vvi-MIR156h-p5_2ss13GT22TC	XM_016594405.1	XM_016594405.1	SPL6	-	1606-1627	1.5	GO:0003677(DNA binding);GO:0003700(transcription factor activity, sequence-specific DNA binding);GO:0005634(nucleus);GO:0006351(transcription, DNA-templated);GO:0006355(regulation of transcription, DNA-templated);GO:0010468(regulation of gene expression);GO:0042742(defense response to bacterium);GO:0046872(metal ion binding)
vvi-MIR156h-p5_2ss13GT22TC	XM_016647076.1	XM_016647076.1	SPL6	-	1421-1442	2.5	GO:0003677(DNA binding);GO:0003700(transcription factor activity, sequence-specific DNA binding);GO:0005634(nucleus);GO:0006351(transcription, DNA-templated);GO:0006355(regulation of transcription, DNA-templated);GO:0010468(regulation of gene expression);GO:0042742(defense response to bacterium);GO:0046872(metal ion binding)
vvi-MIR156h-p5_2ss13GT22TC	XM_016626070.1	XM_016626070.1	SBP1	uncharacterized LOC103401427	2085-2106	1.5	GO:0003677(DNA binding);GO:0003700(transcription factor activity, sequence-specific DNA binding);GO:0005634(nucleus);GO:0005737(cytoplasm);GO:0006351(transcription, DNA-templated);GO:0006355(regulation of transcription, DNA-templated);GO:0009908(flower development);GO:0009911(positive regulation of flower development);GO:0010228(vegetative to reproductive phase transition of meristem);GO:0010229(…	ko04075(Plant hormone signal transduction)
vvi-MIR156h-p5_2ss13GT22TC	XM_016580674.1	XM_016580674.1	SPL10	uncharacterized LOC103401427	706-727	1.5	GO:0003677(DNA binding);GO:0005634(nucleus);GO:0005737(cytoplasm);GO:0006351(transcription, DNA-templated);GO:0006355(regulation of transcription, DNA-templated);GO:0009554(megasporogenesis);GO:0009556(microsporogenesis);GO:0030154(cell differentiation);GO:0046872(metal ion binding);GO:0048653(anther development)	ko04075(Plant hormone signal transduction)
vvi-MIR156h-p5_2ss13GT22TC	XM_016611390.1	XM_016611390.1	SPL5	-	714-735	1.5	GO:0003677(DNA binding);GO:0003700(transcription factor activity, sequence-specific DNA binding);GO:0005634(nucleus);GO:0005737(cytoplasm);GO:0006351(transcription, DNA-templated);GO:0006355(regulation of transcription, DNA-templated);GO:0010321(regulation of vegetative phase change);GO:0046872(metal ion binding)
vvi-MIR156h-p5_2ss13GT22TC	XM_016626965.1	XM_016626965.1	TGA1	-	1371-1392	1.5	GO:0003677(DNA binding);GO:0003700(transcription factor activity, sequence-specific DNA binding);GO:0005634(nucleus);GO:0006351(transcription, DNA-templated);GO:0006355(regulation of transcription, DNA-templated);GO:0046872(metal ion binding);GO:0048653(anther development)
vvi-MIR156h-p5_2ss13GT22TC	XM_016626964.1	XM_016626964.1	TGA1	-	1164-1185	1.5	GO:0003677(DNA binding);GO:0003700(transcription factor activity, sequence-specific DNA binding);GO:0005634(nucleus);GO:0006351(transcription, DNA-templated);GO:0006355(regulation of transcription, DNA-templated);GO:0046872(metal ion binding);GO:0048653(anther development)
vvi-MIR156h-p5_2ss13GT22TC	XM_016626967.1	XM_016626967.1	TGA1	-	1167-1188	1.5	GO:0003677(DNA binding);GO:0003700(transcription factor activity, sequence-specific DNA binding);GO:0005634(nucleus);GO:0006351(transcription, DNA-templated);GO:0006355(regulation of transcription, DNA-templated);GO:0046872(metal ion binding);GO:0048653(anther development)
vvi-MIR156h-p5_2ss13GT22TC	XM_016626963.1	XM_016626963.1	TGA1	-	1493-1514	1.5	GO:0003677(DNA binding);GO:0003700(transcription factor activity, sequence-specific DNA binding);GO:0005634(nucleus);GO:0006351(transcription, DNA-templated);GO:0006355(regulation of transcription, DNA-templated);GO:0046872(metal ion binding);GO:0048653(anther development)
vvi-MIR156h-p5_2ss13GT22TC	XM_016626966.1	XM_016626966.1	TGA1	-	1496-1517	1.5	GO:0003677(DNA binding);GO:0003700(transcription factor activity, sequence-specific DNA binding);GO:0005634(nucleus);GO:0006351(transcription, DNA-templated);GO:0006355(regulation of transcription, DNA-templated);GO:0046872(metal ion binding);GO:0048653(anther development)
vvi-MIR156h-p5_2ss13GT22TC	XM_016611687.1	XM_016611687.1	SPL6	-	1633-1654	1.5	GO:0003677(DNA binding);GO:0003700(transcription factor activity, sequence-specific DNA binding);GO:0005634(nucleus);GO:0006351(transcription, DNA-templated);GO:0006355(regulation of transcription, DNA-templated);GO:0010468(regulation of gene expression);GO:0042742(defense response to bacterium);GO:0046872(metal ion binding)
vvi-MIR156h-p5_2ss13GT22TC	XM_016649820.1	XM_016649820.1	SPL17	-	896-917	2.5	GO:0003677(DNA binding);GO:0003700(transcription factor activity, sequence-specific DNA binding);GO:0005634(nucleus);GO:0006351(transcription, DNA-templated);GO:0006355(regulation of transcription, DNA-templated);GO:0008361(regulation of cell size);GO:0010228(vegetative to reproductive phase transition of meristem);GO:0042127(regulation of cell proliferation);GO:0046872(metal ion binding);GO:0048…
vvi-MIR156h-p5_2ss13GT22TC	XM_016598217.1	XM_016598217.1	SPL6	-	1410-1431	2.5	GO:0003677(DNA binding);GO:0003700(transcription factor activity, sequence-specific DNA binding);GO:0005634(nucleus);GO:0006351(transcription, DNA-templated);GO:0006355(regulation of transcription, DNA-templated);GO:0010468(regulation of gene expression);GO:0042742(defense response to bacterium);GO:0046872(metal ion binding)
vvi-MIR156h-p5_2ss13GT22TC	XM_016651177.1	XM_016651177.1	SPL3	-	1406-1427	2.5	GO:0003677(DNA binding);GO:0003700(transcription factor activity, sequence-specific DNA binding);GO:0005634(nucleus);GO:0006351(transcription, DNA-templated);GO:0006355(regulation of transcription, DNA-templated);GO:0044212(transcription regulatory region DNA binding);GO:0046872(metal ion binding);GO:0048510(regulation of timing of transition from vegetative to reproductive phase);GO:0048653(anth…
vvi-MIR156h-p5_2ss13GT22TC	XM_016651175.1	XM_016651175.1	SPL3	-	2099-2120	2.5	GO:0003677(DNA binding);GO:0003700(transcription factor activity, sequence-specific DNA binding);GO:0005634(nucleus);GO:0006351(transcription, DNA-templated);GO:0006355(regulation of transcription, DNA-templated);GO:0044212(transcription regulatory region DNA binding);GO:0046872(metal ion binding);GO:0048510(regulation of timing of transition from vegetative to reproductive phase);GO:0048653(anth…
vvi-MIR156h-p5_2ss13GT22TC	XM_016651176.1	XM_016651176.1	SPL3	-	1394-1415	2.5	GO:0003677(DNA binding);GO:0003700(transcription factor activity, sequence-specific DNA binding);GO:0005634(nucleus);GO:0006351(transcription, DNA-templated);GO:0006355(regulation of transcription, DNA-templated);GO:0044212(transcription regulatory region DNA binding);GO:0046872(metal ion binding);GO:0048510(regulation of timing of transition from vegetative to reproductive phase);GO:0048653(anth…
vvi-MIR156h-p5_2ss13GT22TC	XM_016651174.1	XM_016651174.1	SPL3	-	1575-1596	2.5	GO:0003677(DNA binding);GO:0003700(transcription factor activity, sequence-specific DNA binding);GO:0005634(nucleus);GO:0006351(transcription, DNA-templated);GO:0006355(regulation of transcription, DNA-templated);GO:0044212(transcription regulatory region DNA binding);GO:0046872(metal ion binding);GO:0048510(regulation of timing of transition from vegetative to reproductive phase);GO:0048653(anth…
vvi-MIR156h-p5_2ss13GT22TC	XM_016630594.1	XM_016630594.1	GH3.6	indole-3-acetic acid-amido synthetase GH3.6-like	43-63	2.5	GO:0005737(cytoplasm);GO:0009507(chloroplast);GO:0009733(response to auxin);GO:0009734(auxin-activated signaling pathway);GO:0009826(unidimensional cell growth);GO:0010252(auxin homeostasis);GO:0010279(indole-3-acetic acid amido synthetase activity)	ko04075(Plant hormone signal transduction)
vvi-MIR156h-p5_2ss13GT22TC	XM_016630732.1	XM_016630732.1	SPL7	uncharacterized LOC103401427	884-905	2.5	GO:0003677(DNA binding);GO:0003700(transcription factor activity, sequence-specific DNA binding);GO:0005634(nucleus);GO:0006351(transcription, DNA-templated);GO:0006355(regulation of transcription, DNA-templated);GO:0046872(metal ion binding);GO:0048510(regulation of timing of transition from vegetative to reproductive phase)	ko04075(Plant hormone signal transduction)
vvi-MIR156h-p5_2ss13GT22TC	XM_016634436.1	XM_016634436.1	SPL17	uncharacterized LOC103401427	927-948	2.5	GO:0003677(DNA binding);GO:0003700(transcription factor activity, sequence-specific DNA binding);GO:0005634(nucleus);GO:0005737(cytoplasm);GO:0006351(transcription, DNA-templated);GO:0006355(regulation of transcription, DNA-templated);GO:0010228(vegetative to reproductive phase transition of meristem);GO:0046872(metal ion binding);GO:0048366(leaf development);GO:0048653(anther development);GO:200…	ko04075(Plant hormone signal transduction)
vvi-MIR156h-p5_2ss13GT22TC	XM_016653897.1	XM_016653897.1	SPL6	uncharacterized LOC103401427	1748-1769	2.5	GO:0003677(DNA binding);GO:0003700(transcription factor activity, sequence-specific DNA binding);GO:0005634(nucleus);GO:0006351(transcription, DNA-templated);GO:0006355(regulation of transcription, DNA-templated);GO:0010468(regulation of gene expression);GO:0042742(defense response to bacterium);GO:0046872(metal ion binding)	ko04075(Plant hormone signal transduction)
vvi-MIR156h-p5_2ss13GT22TC	XM_016655245.1	XM_016655245.1	SPL6	-	1673-1694	2.5	GO:0003677(DNA binding);GO:0003700(transcription factor activity, sequence-specific DNA binding);GO:0005634(nucleus);GO:0006351(transcription, DNA-templated);GO:0006355(regulation of transcription, DNA-templated);GO:0010468(regulation of gene expression);GO:0042742(defense response to bacterium);GO:0046872(metal ion binding)
vvi-MIR156h-p5_2ss13GT22TC	XM_016655244.1	XM_016655244.1	SPL6	-	1364-1385	2.5	GO:0003677(DNA binding);GO:0003700(transcription factor activity, sequence-specific DNA binding);GO:0005634(nucleus);GO:0006351(transcription, DNA-templated);GO:0006355(regulation of transcription, DNA-templated);GO:0010468(regulation of gene expression);GO:0042742(defense response to bacterium);GO:0046872(metal ion binding)
vvi-MIR156h-p5_2ss13GT22TC	XM_016640008.1	XM_016640008.1	SPL6	-	1748-1769	2	GO:0003677(DNA binding);GO:0003700(transcription factor activity, sequence-specific DNA binding);GO:0005634(nucleus);GO:0006351(transcription, DNA-templated);GO:0006355(regulation of transcription, DNA-templated);GO:0010468(regulation of gene expression);GO:0042742(defense response to bacterium);GO:0046872(metal ion binding)
vvi-MIR156h-p5_2ss13GT22TC	XM_016602811.1	XM_016602811.1	-	-	924-945	2.5	-
vvi-MIR156h-p5_2ss13GT22TC	XM_016602812.1	XM_016602812.1	-	-	563-584	2.5	-
vvi-MIR156h-p5_2ss13GT22TC	XM_016602807.1	XM_016602807.1	SPL2	-	1683-1704	2.5	GO:0003677(DNA binding);GO:0003700(transcription factor activity, sequence-specific DNA binding);GO:0005634(nucleus);GO:0006351(transcription, DNA-templated);GO:0006355(regulation of transcription, DNA-templated);GO:0044212(transcription regulatory region DNA binding);GO:0046872(metal ion binding);GO:0048510(regulation of timing of transition from vegetative to reproductive phase);GO:0048653(anth…
vvi-MIR156h-p5_2ss13GT22TC	XM_016602798.1	XM_016602798.1	SPL2	-	2538-2559	2.5	GO:0003677(DNA binding);GO:0003700(transcription factor activity, sequence-specific DNA binding);GO:0005634(nucleus);GO:0006351(transcription, DNA-templated);GO:0006355(regulation of transcription, DNA-templated);GO:0044212(transcription regulatory region DNA binding);GO:0046872(metal ion binding);GO:0048510(regulation of timing of transition from vegetative to reproductive phase);GO:0048653(anth…
vvi-MIR156h-p5_2ss13GT22TC	XM_016602810.1	XM_016602810.1	SPL2	-	2481-2502	2.5	GO:0003677(DNA binding);GO:0003700(transcription factor activity, sequence-specific DNA binding);GO:0005634(nucleus);GO:0006351(transcription, DNA-templated);GO:0006355(regulation of transcription, DNA-templated);GO:0044212(transcription regulatory region DNA binding);GO:0046872(metal ion binding);GO:0048510(regulation of timing of transition from vegetative to reproductive phase);GO:0048653(anth…
vvi-MIR156h-p5_2ss13GT22TC	XM_016602809.1	XM_016602809.1	SPL2	-	1725-1746	2.5	GO:0003677(DNA binding);GO:0003700(transcription factor activity, sequence-specific DNA binding);GO:0005634(nucleus);GO:0006351(transcription, DNA-templated);GO:0006355(regulation of transcription, DNA-templated);GO:0044212(transcription regulatory region DNA binding);GO:0046872(metal ion binding);GO:0048510(regulation of timing of transition from vegetative to reproductive phase);GO:0048653(anth…
vvi-MIR156h-p5_2ss13GT22TC	XM_016602808.1	XM_016602808.1	SPL2	-	1728-1749	2.5	GO:0003677(DNA binding);GO:0003700(transcription factor activity, sequence-specific DNA binding);GO:0005634(nucleus);GO:0006351(transcription, DNA-templated);GO:0006355(regulation of transcription, DNA-templated);GO:0044212(transcription regulatory region DNA binding);GO:0046872(metal ion binding);GO:0048510(regulation of timing of transition from vegetative to reproductive phase);GO:0048653(anth…
vvi-MIR156h-p5_2ss13GT22TC	XM_016602802.1	XM_016602802.1	SPL2	-	1812-1833	2.5	GO:0003677(DNA binding);GO:0003700(transcription factor activity, sequence-specific DNA binding);GO:0005634(nucleus);GO:0006351(transcription, DNA-templated);GO:0006355(regulation of transcription, DNA-templated);GO:0044212(transcription regulatory region DNA binding);GO:0046872(metal ion binding);GO:0048510(regulation of timing of transition from vegetative to reproductive phase);GO:0048653(anth…
vvi-MIR156h-p5_2ss13GT22TC	XM_016602803.1	XM_016602803.1	SPL2	-	1815-1836	2.5	GO:0003677(DNA binding);GO:0003700(transcription factor activity, sequence-specific DNA binding);GO:0005634(nucleus);GO:0006351(transcription, DNA-templated);GO:0006355(regulation of transcription, DNA-templated);GO:0044212(transcription regulatory region DNA binding);GO:0046872(metal ion binding);GO:0048510(regulation of timing of transition from vegetative to reproductive phase);GO:0048653(anth…
vvi-MIR156h-p5_2ss13GT22TC	XM_016602806.1	XM_016602806.1	SPL2	-	1817-1838	2.5	GO:0003677(DNA binding);GO:0003700(transcription factor activity, sequence-specific DNA binding);GO:0005634(nucleus);GO:0006351(transcription, DNA-templated);GO:0006355(regulation of transcription, DNA-templated);GO:0044212(transcription regulatory region DNA binding);GO:0046872(metal ion binding);GO:0048510(regulation of timing of transition from vegetative to reproductive phase);GO:0048653(anth…
vvi-MIR156h-p5_2ss13GT22TC	XM_016602801.1	XM_016602801.1	SPL2	-	2539-2560	2.5	GO:0003677(DNA binding);GO:0003700(transcription factor activity, sequence-specific DNA binding);GO:0005634(nucleus);GO:0006351(transcription, DNA-templated);GO:0006355(regulation of transcription, DNA-templated);GO:0044212(transcription regulatory region DNA binding);GO:0046872(metal ion binding);GO:0048510(regulation of timing of transition from vegetative to reproductive phase);GO:0048653(anth…
vvi-MIR156h-p5_2ss13GT22TC	XM_016602800.1	XM_016602800.1	SPL2	-	2542-2563	2.5	GO:0003677(DNA binding);GO:0003700(transcription factor activity, sequence-specific DNA binding);GO:0005634(nucleus);GO:0006351(transcription, DNA-templated);GO:0006355(regulation of transcription, DNA-templated);GO:0044212(transcription regulatory region DNA binding);GO:0046872(metal ion binding);GO:0048510(regulation of timing of transition from vegetative to reproductive phase);GO:0048653(anth…
vvi-MIR156h-p5_2ss13GT22TC	XM_016602805.1	XM_016602805.1	SPL2	-	2516-2537	2.5	GO:0003677(DNA binding);GO:0003700(transcription factor activity, sequence-specific DNA binding);GO:0005634(nucleus);GO:0006351(transcription, DNA-templated);GO:0006355(regulation of transcription, DNA-templated);GO:0044212(transcription regulatory region DNA binding);GO:0046872(metal ion binding);GO:0048510(regulation of timing of transition from vegetative to reproductive phase);GO:0048653(anth…
vvi-MIR156h-p5_2ss13GT22TC	XM_016602799.1	XM_016602799.1	SPL2	-	2585-2606	2.5	GO:0003677(DNA binding);GO:0003700(transcription factor activity, sequence-specific DNA binding);GO:0005634(nucleus);GO:0006351(transcription, DNA-templated);GO:0006355(regulation of transcription, DNA-templated);GO:0044212(transcription regulatory region DNA binding);GO:0046872(metal ion binding);GO:0048510(regulation of timing of transition from vegetative to reproductive phase);GO:0048653(anth…
vvi-MIR156h-p5_2ss13GT22TC	XM_016588078.1	XM_016588078.1	TGA1	-	1259-1280	1.5	GO:0003677(DNA binding);GO:0003700(transcription factor activity, sequence-specific DNA binding);GO:0005634(nucleus);GO:0006351(transcription, DNA-templated);GO:0006355(regulation of transcription, DNA-templated);GO:0046872(metal ion binding);GO:0048653(anther development)
vvi-MIR156h-p5_2ss13GT22TC	XM_016588079.1	XM_016588079.1	TGA1	-	1262-1283	1.5	GO:0003677(DNA binding);GO:0003700(transcription factor activity, sequence-specific DNA binding);GO:0005634(nucleus);GO:0006351(transcription, DNA-templated);GO:0006355(regulation of transcription, DNA-templated);GO:0046872(metal ion binding);GO:0048653(anther development)
vvi-MIR156h-p5_2ss13GT22TC	XM_016588082.1	XM_016588082.1	TGA1	-	1914-1935	1.5	GO:0003677(DNA binding);GO:0003700(transcription factor activity, sequence-specific DNA binding);GO:0005634(nucleus);GO:0006351(transcription, DNA-templated);GO:0006355(regulation of transcription, DNA-templated);GO:0046872(metal ion binding);GO:0048653(anther development)
vvi-MIR156h-p5_2ss13GT22TC	XM_016588077.1	XM_016588077.1	TGA1	-	1962-1983	1.5	GO:0003677(DNA binding);GO:0003700(transcription factor activity, sequence-specific DNA binding);GO:0005634(nucleus);GO:0006351(transcription, DNA-templated);GO:0006355(regulation of transcription, DNA-templated);GO:0046872(metal ion binding);GO:0048653(anther development)
vvi-MIR156h-p5_2ss13GT22TC	XM_016588080.1	XM_016588080.1	TGA1	-	1064-1085	1.5	GO:0003677(DNA binding);GO:0003700(transcription factor activity, sequence-specific DNA binding);GO:0005634(nucleus);GO:0006351(transcription, DNA-templated);GO:0006355(regulation of transcription, DNA-templated);GO:0046872(metal ion binding);GO:0048653(anther development)
vvi-MIR156h-p5_2ss13GT22TC	XM_016588081.1	XM_016588081.1	TGA1	-	1067-1088	1.5	GO:0003677(DNA binding);GO:0003700(transcription factor activity, sequence-specific DNA binding);GO:0005634(nucleus);GO:0006351(transcription, DNA-templated);GO:0006355(regulation of transcription, DNA-templated);GO:0046872(metal ion binding);GO:0048653(anther development)
vvi-MIR156h-p5_2ss13GT22TC	XM_016658313.1	XM_016658313.1	F-ATMBP	-	738-758	2.2	GO:0005576(extracellular region);GO:0006952(defense response);GO:0007155(cell adhesion);GO:0009611(response to wounding);GO:0009908(flower development);GO:0010169(thioglucosidase complex);GO:0010180(thioglucosidase binding);GO:0030246(carbohydrate binding)
vvi-MIR156h-p5_2ss13GT22TC	XM_016642884.1	XM_016642884.1	SPL17	-	1174-1195	2.5	GO:0003677(DNA binding);GO:0003700(transcription factor activity, sequence-specific DNA binding);GO:0005634(nucleus);GO:0005737(cytoplasm);GO:0006351(transcription, DNA-templated);GO:0006355(regulation of transcription, DNA-templated);GO:0010321(regulation of vegetative phase change);GO:0046872(metal ion binding)
vvi-MIR156h-p5_2ss13GT22TC	XM_016636254.1	XM_016636254.1	SBP1	uncharacterized LOC103401427	712-733	1.5	GO:0003677(DNA binding);GO:0003700(transcription factor activity, sequence-specific DNA binding);GO:0005634(nucleus);GO:0005737(cytoplasm);GO:0006351(transcription, DNA-templated);GO:0006355(regulation of transcription, DNA-templated);GO:0009908(flower development);GO:0009911(positive regulation of flower development);GO:0010228(vegetative to reproductive phase transition of meristem);GO:0010229(…	ko04075(Plant hormone signal transduction)
vvi-MIR156h-p5_2ss13GT22TC	XM_016643194.1	XM_016643194.1	GH3.6	indole-3-acetic acid-amido synthetase GH3.6-like	43-63	2.5	GO:0005737(cytoplasm);GO:0009507(chloroplast);GO:0009733(response to auxin);GO:0009734(auxin-activated signaling pathway);GO:0009826(unidimensional cell growth);GO:0010252(auxin homeostasis);GO:0010279(indole-3-acetic acid amido synthetase activity)	ko04075(Plant hormone signal transduction)
vvi-MIR156h-p5_2ss13GT22TC	XM_016590259.1	XM_016590259.1	SPL6	-	1782-1803	2	GO:0003677(DNA binding);GO:0003700(transcription factor activity, sequence-specific DNA binding);GO:0005634(nucleus);GO:0006351(transcription, DNA-templated);GO:0006355(regulation of transcription, DNA-templated);GO:0010468(regulation of gene expression);GO:0042742(defense response to bacterium);GO:0046872(metal ion binding)
vvi-MIR156h-p5_2ss13GT22TC	XM_016643476.1	XM_016643476.1	SPL17	-	642-663	2.5	-
vvi-MIR156h-p5_2ss13GT22TC	XM_016606427.1	XM_016606427.1	SPL3	-	1440-1461	2.5	GO:0003677(DNA binding);GO:0003700(transcription factor activity, sequence-specific DNA binding);GO:0005634(nucleus);GO:0006351(transcription, DNA-templated);GO:0006355(regulation of transcription, DNA-templated);GO:0044212(transcription regulatory region DNA binding);GO:0046872(metal ion binding);GO:0048510(regulation of timing of transition from vegetative to reproductive phase);GO:0048653(anth…
vvi-MIR156h-p5_2ss13GT22TC	XM_016606428.1	XM_016606428.1	SPL3	-	1446-1467	2.5	GO:0003677(DNA binding);GO:0003700(transcription factor activity, sequence-specific DNA binding);GO:0005634(nucleus);GO:0006351(transcription, DNA-templated);GO:0006355(regulation of transcription, DNA-templated);GO:0044212(transcription regulatory region DNA binding);GO:0046872(metal ion binding);GO:0048510(regulation of timing of transition from vegetative to reproductive phase);GO:0048653(anth…
vvi-MIR156h-p5_2ss13GT22TC	XM_016606866.1	XM_016606866.1	SPL10	uncharacterized LOC103401427	707-728	1.5	GO:0003677(DNA binding);GO:0005634(nucleus);GO:0005737(cytoplasm);GO:0006351(transcription, DNA-templated);GO:0006355(regulation of transcription, DNA-templated);GO:0009554(megasporogenesis);GO:0009556(microsporogenesis);GO:0030154(cell differentiation);GO:0046872(metal ion binding);GO:0048653(anther development)	ko04075(Plant hormone signal transduction)
rgl-miR7972	XM_016579729.1	XM_016579729.1	ACT-2	Anthranilate N-benzoyltransferase protein	823-842	2.2	GO:0047634(agmatine N4-coumaroyltransferase activity)	ko00940(Phenylpropanoid biosynthesis);ko00945(Stilbenoid, diarylheptanoid and gingerol biosynthesis);ko00941(Flavonoid biosynthesis)
rgl-miR7972	XM_016614270.1	XM_016614270.1	ROS1	-	926-946	1.5	GO:0003677(DNA binding);GO:0003906(DNA-);GO:0005515(protein binding);GO:0005634(nucleus);GO:0005730(nucleolus);GO:0006281(DNA repair);GO:0006284(base-excision repair);GO:0006306(DNA methylation);GO:0006342(chromatin silencing);GO:0006351(transcription, DNA-templated);GO:0019104(DNA N-glycosylase activity);GO:0031936(negative regulation of chromatin silencing);GO:0046872(metal ion binding);GO:0051…
rgl-miR7972	XM_016614271.1	XM_016614271.1	ROS1	-	926-946	1.5	GO:0003677(DNA binding);GO:0003906(DNA-);GO:0005515(protein binding);GO:0005634(nucleus);GO:0005730(nucleolus);GO:0006281(DNA repair);GO:0006284(base-excision repair);GO:0006306(DNA methylation);GO:0006342(chromatin silencing);GO:0006351(transcription, DNA-templated);GO:0019104(DNA N-glycosylase activity);GO:0031936(negative regulation of chromatin silencing);GO:0046872(metal ion binding);GO:0051…
rgl-miR7972	XM_016584652.1	XM_016584652.1	At3g25440	uncharacterized CRM domain-containing protein At3g25440	1808-1828	2.5	GO:0003723(RNA binding);GO:0009507(chloroplast)	ko03018(RNA degradation)
rgl-miR7972	XM_016638632.1	XM_016638632.1	ROS1	-	1195-1215	1.8	GO:0003677(DNA binding);GO:0003906(DNA-);GO:0005515(protein binding);GO:0005634(nucleus);GO:0005730(nucleolus);GO:0006281(DNA repair);GO:0006284(base-excision repair);GO:0006306(DNA methylation);GO:0006342(chromatin silencing);GO:0006351(transcription, DNA-templated);GO:0019104(DNA N-glycosylase activity);GO:0031936(negative regulation of chromatin silencing);GO:0046872(metal ion binding);GO:0051…
rgl-miR7972	XM_016638634.1	XM_016638634.1	ROS1	-	1045-1065	1.8	GO:0003677(DNA binding);GO:0003906(DNA-);GO:0005515(protein binding);GO:0005634(nucleus);GO:0005730(nucleolus);GO:0006281(DNA repair);GO:0006284(base-excision repair);GO:0006306(DNA methylation);GO:0006342(chromatin silencing);GO:0006351(transcription, DNA-templated);GO:0019104(DNA N-glycosylase activity);GO:0031936(negative regulation of chromatin silencing);GO:0046872(metal ion binding);GO:0051…
rgl-miR7972	XM_016638631.1	XM_016638631.1	ROS1	-	1182-1202	1.8	GO:0003677(DNA binding);GO:0003906(DNA-);GO:0005515(protein binding);GO:0005634(nucleus);GO:0005730(nucleolus);GO:0006281(DNA repair);GO:0006284(base-excision repair);GO:0006306(DNA methylation);GO:0006342(chromatin silencing);GO:0006351(transcription, DNA-templated);GO:0019104(DNA N-glycosylase activity);GO:0031936(negative regulation of chromatin silencing);GO:0046872(metal ion binding);GO:0051…
rgl-miR7972	XM_016638633.1	XM_016638633.1	ROS1	-	1032-1052	1.8	GO:0003677(DNA binding);GO:0003906(DNA-);GO:0005515(protein binding);GO:0005634(nucleus);GO:0005730(nucleolus);GO:0006281(DNA repair);GO:0006284(base-excision repair);GO:0006306(DNA methylation);GO:0006342(chromatin silencing);GO:0006351(transcription, DNA-templated);GO:0019104(DNA N-glycosylase activity);GO:0031936(negative regulation of chromatin silencing);GO:0046872(metal ion binding);GO:0051…
rgl-miR7972	XM_016632652.1	XM_016632652.1	Mettl6	-	963-983	2.5	GO:0005634(nucleus);GO:0008168(methyltransferase activity);GO:0032259(methylation)
rgl-miR7972	XM_016633188.1	XM_016633188.1	ROS1	-	1113-1133	2	GO:0003677(DNA binding);GO:0003906(DNA-);GO:0005515(protein binding);GO:0005634(nucleus);GO:0005730(nucleolus);GO:0006281(DNA repair);GO:0006284(base-excision repair);GO:0006306(DNA methylation);GO:0006342(chromatin silencing);GO:0006351(transcription, DNA-templated);GO:0019104(DNA N-glycosylase activity);GO:0031936(negative regulation of chromatin silencing);GO:0046872(metal ion binding);GO:0051…
rgl-miR7972	XM_016655793.1	XM_016655793.1	MED14	-	1566-1586	2.2	GO:0001104(RNA polymerase II transcription cofactor activity);GO:0016592(mediator complex);GO:0070847(core mediator complex)
rgl-miR7972	XM_016603774.1	XM_016603774.1	-	-	1145-1165	2	-
rgl-miR7972	XM_016605415.1	XM_016605415.1	MED14	-	618-638	2.2	GO:0001104(RNA polymerase II transcription cofactor activity);GO:0016592(mediator complex);GO:0070847(core mediator complex)
rgl-miR7972	XM_016659970.1	XM_016659970.1	Mettl6	-	979-999	2.5	GO:0005634(nucleus);GO:0008168(methyltransferase activity);GO:0032259(methylation)
mtr-miR159a_L+1R-1	XM_016592509.1	XM_016592509.1	Hgsnat	heparan-alpha-glucosaminide N-acetyltransferase	1039-1058	2.5	GO:0003674(molecular_function);GO:0005634(nucleus);GO:0005739(mitochondrion);GO:0008150(biological_process);GO:0016021(integral component of membrane)	ko00531(Glycosaminoglycan degradation)
mtr-miR159a_L+1R-1	XM_016660741.1	XM_016660741.1	-	WAS/WASL-interacting protein family member 1-like	1140-1160	2.2	-	ko04144(Endocytosis)
mtr-miR159a_L+1R-1	XM_016623745.1	XM_016623745.1	AC101	actin	441-460	2.5	GO:0005200(structural constituent of cytoskeleton);GO:0005524(ATP binding);GO:0005737(cytoplasm);GO:0005739(mitochondrion);GO:0005856(cytoskeleton);GO:0005886(plasma membrane);GO:0009506(plasmodesma);GO:0009570(chloroplast stroma);GO:0009941(chloroplast envelope);GO:0030036(actin cytoskeleton organization)	ko04145(Phagosome)
mtr-miR159a_L+1R-1	XM_016577517.1	XM_016577517.1	-	-	663-682	2.5	GO:0003674(molecular_function);GO:0005634(nucleus);GO:0008150(biological_process);GO:0070461(SAGA-type complex)
mtr-miR159a_L+1R-1	XM_016577531.1	XM_016577531.1	-	-	1560-1580	2.5	GO:0030599(pectinesterase activity);GO:0046910(pectinesterase inhibitor activity);GO:0071944(cell periphery)
mtr-miR159a_L+1R-1	XM_016646528.1	XM_016646528.1	GAM1	myb domain protein 30	152-172	1.8	GO:0003677(DNA binding);GO:0003700(transcription factor activity, sequence-specific DNA binding);GO:0005634(nucleus);GO:0006355(regulation of transcription, DNA-templated);GO:0048235(pollen sperm cell differentiation)	ko04626(Plant-pathogen interaction)
mtr-miR159a_L+1R-1	XM_016652010.1	XM_016652010.1	GAM1	myb domain protein 30	142-162	1.8	GO:0003677(DNA binding);GO:0003700(transcription factor activity, sequence-specific DNA binding);GO:0005634(nucleus);GO:0006355(regulation of transcription, DNA-templated);GO:0048235(pollen sperm cell differentiation)	ko04626(Plant-pathogen interaction)
mtr-miR159a_L+1R-1	XM_016647264.1	XM_016647264.1	At5g03795	-	1206-1226	2.5	GO:0003824(catalytic activity);GO:0005794(Golgi apparatus);GO:0008150(biological_process);GO:0016020(membrane)
mtr-miR159a_L+1R-1	XM_016647263.1	XM_016647263.1	At5g03795	-	1203-1223	2.5	GO:0003824(catalytic activity);GO:0005794(Golgi apparatus);GO:0008150(biological_process);GO:0016020(membrane)
mtr-miR159a_L+1R-1	XM_016595285.1	XM_016595285.1	NUP205	nuclear pore complex protein NUP205	114-134	2.5	GO:0000059(protein import into nucleus, docking);GO:0006999(nuclear pore organization);GO:0017056(structural constituent of nuclear pore);GO:0044611(nuclear pore inner ring)	ko03013(RNA transport)
mtr-miR159a_L+1R-1	XM_016647916.1	XM_016647916.1	-	actin	506-527	2.5	GO:0005200(structural constituent of cytoskeleton);GO:0005524(ATP binding);GO:0005737(cytoplasm);GO:0005739(mitochondrion);GO:0005856(cytoskeleton);GO:0005886(plasma membrane);GO:0009506(plasmodesma);GO:0009570(chloroplast stroma);GO:0009941(chloroplast envelope);GO:0030036(actin cytoskeleton organization)	ko04145(Phagosome)
mtr-miR159a_L+1R-1	XM_016647918.1	XM_016647918.1	-	actin	513-534	2.5	GO:0005200(structural constituent of cytoskeleton);GO:0005524(ATP binding);GO:0005737(cytoplasm);GO:0005739(mitochondrion);GO:0005856(cytoskeleton);GO:0005886(plasma membrane);GO:0009506(plasmodesma);GO:0009570(chloroplast stroma);GO:0009941(chloroplast envelope);GO:0030036(actin cytoskeleton organization)	ko04145(Phagosome)
mtr-miR159a_L+1R-1	XM_016647917.1	XM_016647917.1	-	actin	410-431	2.5	GO:0005200(structural constituent of cytoskeleton);GO:0005524(ATP binding);GO:0005737(cytoplasm);GO:0005739(mitochondrion);GO:0005856(cytoskeleton);GO:0005886(plasma membrane);GO:0009506(plasmodesma);GO:0009570(chloroplast stroma);GO:0009941(chloroplast envelope);GO:0030036(actin cytoskeleton organization)	ko04145(Phagosome)
mtr-miR159a_L+1R-1	XM_016626154.1	XM_016626154.1	-	-	527-547	2.5	GO:0005634(nucleus);GO:0005794(Golgi apparatus);GO:0005886(plasma membrane);GO:0009416(response to light stimulus);GO:0009718(anthocyanin-containing compound biosynthetic process);GO:0015995(chlorophyll biosynthetic process);GO:0045893(positive regulation of transcription, DNA-templated)
mtr-miR159a_L+1R-1	XM_016580176.1	XM_016580176.1	MTERF1	-	332-353	2.5	GO:0003690(double-stranded DNA binding);GO:0005739(mitochondrion);GO:0006355(regulation of transcription, DNA-templated);GO:0009507(chloroplast)
mtr-miR159a_L+1R-1	XM_016611534.1	XM_016611534.1	At5g03795	-	1315-1335	2.5	GO:0003824(catalytic activity);GO:0005794(Golgi apparatus);GO:0008150(biological_process);GO:0016020(membrane);GO:0016021(integral component of membrane);GO:0016740(transferase activity)
mtr-miR159a_L+1R-1	XM_016649111.1	XM_016649111.1	GAM1	myb domain protein 30	1676-1696	1.5	GO:0003677(DNA binding);GO:0003700(transcription factor activity, sequence-specific DNA binding);GO:0005634(nucleus);GO:0006355(regulation of transcription, DNA-templated)	ko04626(Plant-pathogen interaction)
mtr-miR159a_L+1R-1	XM_016597770.1	XM_016597770.1	-	WAS/WASL-interacting protein family member 1-like	1060-1080	2.2	-	ko04144(Endocytosis)
mtr-miR159a_L+1R-1	XM_016582474.1	XM_016582474.1	-	-	527-547	2.5	GO:0005634(nucleus);GO:0005794(Golgi apparatus);GO:0005886(plasma membrane);GO:0009416(response to light stimulus);GO:0009718(anthocyanin-containing compound biosynthetic process);GO:0015995(chlorophyll biosynthetic process);GO:0045893(positive regulation of transcription, DNA-templated)
mtr-miR159a_L+1R-1	XM_016629136.1	XM_016629136.1	GAM1	myb domain protein 30	1686-1706	1.5	GO:0003677(DNA binding);GO:0003700(transcription factor activity, sequence-specific DNA binding);GO:0005634(nucleus);GO:0006355(regulation of transcription, DNA-templated);GO:0009740(gibberellic acid mediated signaling pathway);GO:0009789(positive regulation of abscisic acid-activated signaling pathway);GO:0043068(positive regulation of programmed cell death);GO:0045893(positive regulation of tra…	ko04626(Plant-pathogen interaction)
mtr-miR159a_L+1R-1	XM_016629135.1	XM_016629135.1	GAM1	myb domain protein 30	1718-1738	1.5	GO:0003677(DNA binding);GO:0003700(transcription factor activity, sequence-specific DNA binding);GO:0005634(nucleus);GO:0006355(regulation of transcription, DNA-templated);GO:0009723(response to ethylene);GO:0009740(gibberellic acid mediated signaling pathway);GO:0009751(response to salicylic acid);GO:0043068(positive regulation of programmed cell death);GO:0045893(positive regulation of transcri…	ko04626(Plant-pathogen interaction)
mtr-miR159a_L+1R-1	XM_016629134.1	XM_016629134.1	GAM1	myb domain protein 30	1718-1738	1.5	GO:0003677(DNA binding);GO:0003700(transcription factor activity, sequence-specific DNA binding);GO:0005634(nucleus);GO:0006355(regulation of transcription, DNA-templated);GO:0009723(response to ethylene);GO:0009740(gibberellic acid mediated signaling pathway);GO:0009751(response to salicylic acid);GO:0043068(positive regulation of programmed cell death);GO:0045893(positive regulation of transcri…	ko04626(Plant-pathogen interaction)
mtr-miR159a_L+1R-1	XM_016612561.1	XM_016612561.1	GAM1	myb domain protein 30	1465-1485	1.8	GO:0003677(DNA binding);GO:0003700(transcription factor activity, sequence-specific DNA binding);GO:0005634(nucleus);GO:0006355(regulation of transcription, DNA-templated)	ko04626(Plant-pathogen interaction)
mtr-miR159a_L+1R-1	XM_016612569.1	XM_016612569.1	GAM1	myb domain protein 30	1308-1328	1.8	GO:0003677(DNA binding);GO:0003700(transcription factor activity, sequence-specific DNA binding);GO:0005634(nucleus);GO:0006355(regulation of transcription, DNA-templated)	ko04626(Plant-pathogen interaction)
mtr-miR159a_L+1R-1	XM_016612555.1	XM_016612555.1	GAM1	myb domain protein 30	1341-1361	1.8	GO:0003677(DNA binding);GO:0003700(transcription factor activity, sequence-specific DNA binding);GO:0005634(nucleus);GO:0006355(regulation of transcription, DNA-templated)	ko04626(Plant-pathogen interaction)
mtr-miR159a_L+1R-1	XM_016612548.1	XM_016612548.1	GAM1	myb domain protein 30	1497-1517	1.8	GO:0003677(DNA binding);GO:0003700(transcription factor activity, sequence-specific DNA binding);GO:0005634(nucleus);GO:0006355(regulation of transcription, DNA-templated)	ko04626(Plant-pathogen interaction)
mtr-miR159a_L+1R-1	XM_016652241.1	XM_016652241.1	-	uncharacterized LOC102702220	2445-2465	2	-	ko00052(Galactose metabolism);ko00561(Glycerolipid metabolism);ko00600(Sphingolipid metabolism);ko00603(Glycosphingolipid biosynthesis - globo series)
mtr-miR159a_L+1R-1	XM_016599514.1	XM_016599514.1	GAM1	myb domain protein 30	960-980	1.8	GO:0003677(DNA binding);GO:0003700(transcription factor activity, sequence-specific DNA binding);GO:0005634(nucleus);GO:0006355(regulation of transcription, DNA-templated);GO:0009723(response to ethylene);GO:0009740(gibberellic acid mediated signaling pathway);GO:0009751(response to salicylic acid);GO:0043068(positive regulation of programmed cell death);GO:0045893(positive regulation of transcri…	ko04626(Plant-pathogen interaction)
mtr-miR159a_L+1R-1	XM_016599515.1	XM_016599515.1	GAM1	myb domain protein 30	1348-1368	1.8	GO:0003677(DNA binding);GO:0003700(transcription factor activity, sequence-specific DNA binding);GO:0005634(nucleus);GO:0006355(regulation of transcription, DNA-templated);GO:0009723(response to ethylene);GO:0009740(gibberellic acid mediated signaling pathway);GO:0009751(response to salicylic acid);GO:0043068(positive regulation of programmed cell death);GO:0045893(positive regulation of transcri…	ko04626(Plant-pathogen interaction)
mtr-miR159a_L+1R-1	XM_016584178.1	XM_016584178.1	At4g01130	alpha-L-fucosidase 3-like	19-38	2.5	GO:0005576(extracellular region);GO:0016042(lipid catabolic process);GO:0016788(hydrolase activity, acting on ester bonds);GO:0052689(carboxylic ester hydrolase activity)	ko00511(Other glycan degradation)
mtr-miR159a_L+1R-1	XM_016635337.1	XM_016635337.1	PUB62	-	73-92	2.5	GO:0004842(ubiquitin-protein transferase activity);GO:0005634(nucleus);GO:0016567(protein ubiquitination);GO:0016874(ligase activity)
mtr-miR159a_L+1R-1	XM_016635332.1	XM_016635332.1	PUB62	-	73-92	2.5	GO:0004842(ubiquitin-protein transferase activity);GO:0005634(nucleus);GO:0016567(protein ubiquitination);GO:0016874(ligase activity)
mtr-miR159a_L+1R-1	XM_016635327.1	XM_016635327.1	PUB62	-	73-92	2.5	GO:0004842(ubiquitin-protein transferase activity);GO:0005634(nucleus);GO:0016567(protein ubiquitination);GO:0016874(ligase activity)
mtr-miR159a_L+1R-1	XM_016635319.1	XM_016635319.1	PUB62	-	73-92	2.5	GO:0004842(ubiquitin-protein transferase activity);GO:0005634(nucleus);GO:0016567(protein ubiquitination);GO:0016874(ligase activity)
mtr-miR159a_L+1R-1	XM_016616717.1	XM_016616717.1	-	-	435-455	2.2	GO:0003674(molecular_function);GO:0008150(biological_process);GO:0009507(chloroplast);GO:0016021(integral component of membrane)
mtr-miR159a_L+1R-1	XM_016633661.1	XM_016633661.1	-	actin	476-497	2.5	GO:0005200(structural constituent of cytoskeleton);GO:0005524(ATP binding);GO:0005737(cytoplasm);GO:0005739(mitochondrion);GO:0005856(cytoskeleton);GO:0005886(plasma membrane);GO:0009506(plasmodesma);GO:0009570(chloroplast stroma);GO:0009941(chloroplast envelope);GO:0030036(actin cytoskeleton organization)	ko04145(Phagosome)
mtr-miR159a_L+1R-1	XM_016633663.1	XM_016633663.1	-	actin	492-513	2.5	GO:0005200(structural constituent of cytoskeleton);GO:0005524(ATP binding);GO:0005737(cytoplasm);GO:0005739(mitochondrion);GO:0005856(cytoskeleton);GO:0005886(plasma membrane);GO:0009506(plasmodesma);GO:0009570(chloroplast stroma);GO:0009941(chloroplast envelope);GO:0030036(actin cytoskeleton organization)	ko04145(Phagosome)
mtr-miR159a_L+1R-1	XM_016618337.1	XM_016618337.1	pol	uncharacterized LOC103696395	427-447	2.5	GO:0000719(photoreactive repair);GO:0003904(deoxyribodipyrimidine photo-lyase activity)	ko00073(Cutin, suberine and wax biosynthesis);ko04146(Peroxisome)
mtr-miR159a_L+1R-1	XM_016634783.1	XM_016634783.1	GAM1	myb domain protein 30	163-183	1.8	GO:0003677(DNA binding);GO:0003700(transcription factor activity, sequence-specific DNA binding);GO:0005634(nucleus);GO:0006355(regulation of transcription, DNA-templated);GO:0048235(pollen sperm cell differentiation)	ko04626(Plant-pathogen interaction)
mtr-miR159a_L+1R-1	XM_016588555.1	XM_016588555.1	R1B-16	putative late blight resistance protein homolog R1B-16	88-107	2.5	GO:0006952(defense response)	ko04626(Plant-pathogen interaction)
mtr-miR159a_L+1R-1	XM_016588554.1	XM_016588554.1	R1B-16	putative late blight resistance protein homolog R1B-16	88-107	2.5	GO:0006952(defense response)	ko04626(Plant-pathogen interaction)
mtr-miR159a_L+1R-1	XM_016588553.1	XM_016588553.1	R1B-16	putative late blight resistance protein homolog R1B-16	88-107	2.5	GO:0006952(defense response)	ko04626(Plant-pathogen interaction)
mtr-miR159a_L+1R-1	XM_016619538.1	XM_016619538.1	Os04g0119400	pyruvate dehydrogenase E1 component subunit alpha-3	1263-1283	2.5	GO:0004739(pyruvate dehydrogenase );GO:0005739(mitochondrion);GO:0005829(cytosol);GO:0006086(acetyl-CoA biosynthetic process from pyruvate);GO:0006096(glycolytic process);GO:0009507(chloroplast);GO:0009536(plastid);GO:0009570(chloroplast stroma);GO:0009941(chloroplast envelope);GO:0055114(oxidation-reduction process)	ko01200(Carbon metabolism);ko00010(Glycolysis / Gluconeogenesis);ko00020(Citrate cycle );ko00620(Pyruvate metabolism)
mtr-miR159a_L+1R-1	XM_016619539.1	XM_016619539.1	-	ATP-dependent RNA helicase DOB1-like	1186-1206	2.5	-	ko03018(RNA degradation)
mtr-miR159a_L+1R-1	XM_016642363.1	XM_016642363.1	GAM1	myb domain protein 30	111-131	1.8	GO:0003677(DNA binding);GO:0003700(transcription factor activity, sequence-specific DNA binding);GO:0005634(nucleus);GO:0006355(regulation of transcription, DNA-templated);GO:0048235(pollen sperm cell differentiation)	ko04626(Plant-pathogen interaction)
mtr-miR159a_L+1R-1	XM_016589328.1	XM_016589328.1	GAM1	myb domain protein 30	1010-1030	1.8	GO:0003677(DNA binding);GO:0003700(transcription factor activity, sequence-specific DNA binding);GO:0005634(nucleus);GO:0006355(regulation of transcription, DNA-templated);GO:0009723(response to ethylene);GO:0009740(gibberellic acid mediated signaling pathway);GO:0009751(response to salicylic acid);GO:0043068(positive regulation of programmed cell death);GO:0045893(positive regulation of transcri…	ko04626(Plant-pathogen interaction)
mtr-miR159a_L+1R-1	XM_016658762.1	XM_016658762.1	-	-	469-489	2.5	GO:0003674(molecular_function);GO:0008150(biological_process);GO:0009507(chloroplast);GO:0016021(integral component of membrane)
mtr-miR159a_L+1R-1	XM_016659168.1	XM_016659168.1	PUB62	-	93-112	2.5	GO:0004842(ubiquitin-protein transferase activity);GO:0005634(nucleus);GO:0016567(protein ubiquitination);GO:0016874(ligase activity)
mtr-miR159a_L+1R-1	XM_016590687.1	XM_016590687.1	RANBP1C	-	15-34	2.5	GO:0000082(G1/S transition of mitotic cell cycle);GO:0005096(GTPase activator activity);GO:0005634(nucleus);GO:0005737(cytoplasm);GO:0005813(centrosome);GO:0006405(RNA export from nucleus);GO:0006511(ubiquitin-dependent protein catabolic process);GO:0006606(protein import into nucleus);GO:0007051(spindle organization);GO:0008536(Ran GTPase binding);GO:0046604(positive regulation of mitotic centro…
eun-MIR530-p5_2ss3AT17CA	XM_016592073.1	XM_016592073.1	AATL1	hypothetical protein	1787-1804	2.2	GO:0003333(amino acid transmembrane transport);GO:0015171(amino acid transmembrane transporter activity)	ko04144(Endocytosis)
eun-MIR530-p5_2ss3AT17CA	XM_016623331.1	XM_016623331.1	-	LRR receptor-like serine/threonine-protein kinase FLS2	299-316	2.5	GO:0004596(peptide alpha-N-acetyltransferase activity);GO:0005737(cytoplasm);GO:0017196(N-terminal peptidyl-methionine acetylation)	ko04626(Plant-pathogen interaction)
eun-MIR530-p5_2ss3AT17CA	XM_016577106.1	XM_016577106.1	-	adenylyltransferase and sulfurtransferase MOCS3-like	111-128	2.2	GO:0009507(chloroplast);GO:0016021(integral component of membrane)	ko04122(Sulfur relay system)
eun-MIR530-p5_2ss3AT17CA	XM_016643607.1	XM_016643607.1	zgc:73324	-	161-178	2.5	GO:0003674(molecular_function);GO:0005739(mitochondrion);GO:0008150(biological_process)
eun-MIR530-p5_2ss3AT17CA	XM_016609053.1	XM_016609053.1	AOP1.2	GMP synthase	1196-1213	2.5	GO:0051213(dioxygenase activity)	ko00230(Purine metabolism)
eun-MIR530-p5_2ss3AT17CA	XM_016594194.1	XM_016594194.1	-	-	1121-1138	2	GO:0003333(amino acid transmembrane transport);GO:0015171(amino acid transmembrane transporter activity)
eun-MIR530-p5_2ss3AT17CA	XM_016646924.1	XM_016646924.1	At5g58410	-	1476-1493	2.5	GO:0005634(nucleus);GO:0005829(cytosol);GO:0008270(zinc ion binding);GO:0016567(protein ubiquitination);GO:0016874(ligase activity)
eun-MIR530-p5_2ss3AT17CA	XM_016654815.1	XM_016654815.1	-	-	169-186	2.5	-
eun-MIR530-p5_2ss3AT17CA	XM_016647170.1	XM_016647170.1	NAT1	-	32-49	2.2	GO:0005215(transporter activity);GO:0005737(cytoplasm);GO:0009506(plasmodesma);GO:0016020(membrane);GO:0016021(integral component of membrane);GO:0022857(transmembrane transporter activity);GO:0055085(transmembrane transport)
eun-MIR530-p5_2ss3AT17CA	XM_016647171.1	XM_016647171.1	NAT1	-	32-49	2.2	GO:0005215(transporter activity);GO:0005737(cytoplasm);GO:0009506(plasmodesma);GO:0016020(membrane);GO:0016021(integral component of membrane);GO:0022857(transmembrane transporter activity);GO:0055085(transmembrane transport)
eun-MIR530-p5_2ss3AT17CA	XM_016657922.1	XM_016657922.1	LIG6	DNA ligase 1	1049-1066	2.5	GO:0003910(DNA ligase );GO:0005737(cytoplasm);GO:0006273(lagging strand elongation);GO:0051103(DNA ligation involved in DNA repair)	ko03030(DNA replication);ko03410(Base excision repair);ko03420(Nucleotide excision repair);ko03430(Mismatch repair)
eun-MIR530-p5_2ss3AT17CA	XM_016657930.1	XM_016657930.1	LIG6	DNA ligase 1	1045-1062	2.5	GO:0003910(DNA ligase );GO:0005737(cytoplasm);GO:0006273(lagging strand elongation);GO:0051103(DNA ligation involved in DNA repair)	ko03030(DNA replication);ko03410(Base excision repair);ko03420(Nucleotide excision repair);ko03430(Mismatch repair)
eun-MIR530-p5_2ss3AT17CA	XM_016625663.1	XM_016625663.1	At1g04910	uncharacterized LOC103446271	2517-2534	2.5	GO:0005737(cytoplasm)	ko00561(Glycerolipid metabolism);ko00564(Glycerophospholipid metabolism)
eun-MIR530-p5_2ss3AT17CA	XM_016625664.1	XM_016625664.1	At1g04910	uncharacterized LOC103446271	1965-1982	2.5	GO:0005737(cytoplasm)	ko00561(Glycerolipid metabolism);ko00564(Glycerophospholipid metabolism)
eun-MIR530-p5_2ss3AT17CA	XM_016625677.1	XM_016625677.1	RRP46	exosome complex exonuclease RRP46 homolog	131-148	2.5	GO:0000176(nuclear exosome );GO:0000177(cytoplasmic exosome );GO:0005730(nucleolus);GO:0016075(rRNA catabolic process);GO:0031125(rRNA 3'-end processing);GO:0034427(nuclear-transcribed mRNA catabolic process, exonucleolytic, 3'-5');GO:0034475(U4 snRNA 3'-end processing);GO:0071028(nuclear mRNA surveillance);GO:0071051(polyadenylation-dependent snoRNA 3'-end processing)	ko03018(RNA degradation)
eun-MIR530-p5_2ss3AT17CA	XM_016647728.1	XM_016647728.1	tipin	-	379-396	2.5	GO:0003676(nucleic acid binding);GO:0005634(nucleus);GO:0006974(cellular response to DNA damage stimulus);GO:0007049(cell cycle);GO:0008270(zinc ion binding);GO:0048478(replication fork protection)
eun-MIR530-p5_2ss3AT17CA	XM_016647776.1	XM_016647776.1	GI	protein GIGANTEA-like	2432-2449	2.5	GO:0005515(protein binding);GO:0005634(nucleus);GO:0005654(nucleoplasm);GO:0005737(cytoplasm);GO:0006355(regulation of transcription, DNA-templated);GO:0007623(circadian rhythm);GO:0009409(response to cold);GO:0009585(red, far-red light phototransduction);GO:0009637(response to blue light);GO:0009908(flower development);GO:0010218(response to far red light);GO:0010378(temperature compensation of …	ko04712(Circadian rhythm - plant)
eun-MIR530-p5_2ss3AT17CA	XM_016648648.1	XM_016648648.1	ASAT1	-	196-213	2	GO:0005515(protein binding);GO:0008150(biological_process);GO:0008374(O-acyltransferase activity);GO:0009507(chloroplast);GO:0016021(integral component of membrane);GO:0016127(sterol catabolic process);GO:0016746(transferase activity, transferring acyl groups);GO:0034434(sterol esterification)
eun-MIR530-p5_2ss3AT17CA	XM_016648951.1	XM_016648951.1	AIR9	cytosolic isocitrate dehydrogenase [NADP]-like	342-359	1.8	-	ko01200(Carbon metabolism);ko01210(2-Oxocarboxylic acid metabolism);ko01230(Biosynthesis of amino acids);ko00020(Citrate cycle );ko00480(Glutathione metabolism);ko04146(Peroxisome)
eun-MIR530-p5_2ss3AT17CA	XM_016596825.1	XM_016596825.1	PCMP-E41	pentatricopeptide repeat-containing protein At2g04860	2076-2093	2.5	GO:0003723(RNA binding);GO:0005739(mitochondrion);GO:0006397(mRNA processing);GO:0008270(zinc ion binding);GO:0009507(chloroplast);GO:1900865(chloroplast RNA modification)	ko00500(Starch and sucrose metabolism)
eun-MIR530-p5_2ss3AT17CA	XM_016596836.1	XM_016596836.1	-	-	1481-1498	2.5	GO:0000783(nuclear telomere cap complex);GO:0003691(double-stranded telomeric DNA binding);GO:0031627(telomeric loop formation)
eun-MIR530-p5_2ss3AT17CA	XM_016596835.1	XM_016596835.1	-	-	1712-1729	2.5	GO:0000783(nuclear telomere cap complex);GO:0003691(double-stranded telomeric DNA binding);GO:0031627(telomeric loop formation)
eun-MIR530-p5_2ss3AT17CA	XM_016596834.1	XM_016596834.1	-	-	1615-1632	2.5	GO:0000783(nuclear telomere cap complex);GO:0003691(double-stranded telomeric DNA binding);GO:0031627(telomeric loop formation)
eun-MIR530-p5_2ss3AT17CA	XM_016612069.1	XM_016612069.1	At2g17525	-	232-249	2.5	GO:0005739(mitochondrion);GO:0008150(biological_process)
eun-MIR530-p5_2ss3AT17CA	XM_016649899.1	XM_016649899.1	NPF5.1	-	1956-1973	2.5	GO:0005215(transporter activity);GO:0005886(plasma membrane);GO:0006810(transport);GO:0006857(oligopeptide transport);GO:0009624(response to nematode);GO:0016020(membrane);GO:0016021(integral component of membrane)
eun-MIR530-p5_2ss3AT17CA	XM_016649900.1	XM_016649900.1	NPF5.1	-	1632-1649	2.5	GO:0005215(transporter activity);GO:0005886(plasma membrane);GO:0006810(transport);GO:0006857(oligopeptide transport);GO:0009624(response to nematode);GO:0016020(membrane);GO:0016021(integral component of membrane)
eun-MIR530-p5_2ss3AT17CA	XM_016612568.1	XM_016612568.1	SEN1	Regulator of nonsense transcripts 1-like protein	5634-5651	2	GO:0005634(nucleus);GO:0008150(biological_process);GO:0009506(plasmodesma);GO:0016787(hydrolase activity)	ko03013(RNA transport);ko03015(mRNA surveillance pathway)
eun-MIR530-p5_2ss3AT17CA	XM_016612567.1	XM_016612567.1	SEN1	Regulator of nonsense transcripts 1-like protein	5794-5811	2	GO:0005634(nucleus);GO:0008150(biological_process);GO:0009506(plasmodesma);GO:0016787(hydrolase activity)	ko03013(RNA transport);ko03015(mRNA surveillance pathway)
eun-MIR530-p5_2ss3AT17CA	XM_016612566.1	XM_016612566.1	SEN1	Regulator of nonsense transcripts 1-like protein	5716-5733	2	GO:0005634(nucleus);GO:0008150(biological_process);GO:0009506(plasmodesma);GO:0016787(hydrolase activity)	ko03013(RNA transport);ko03015(mRNA surveillance pathway)
eun-MIR530-p5_2ss3AT17CA	XM_016612923.1	XM_016612923.1	TET4	-	409-426	2.5	GO:0005576(extracellular region);GO:0007568(aging);GO:0016021(integral component of membrane)
eun-MIR530-p5_2ss3AT17CA	XM_016582018.1	XM_016582018.1	CPR30	Phenylalanyl-tRNA synthetase class IIc family protein	1399-1416	2.5	GO:0004842(ubiquitin-protein transferase activity);GO:0019005(SCF ubiquitin ligase complex);GO:0031146(SCF-dependent proteasomal ubiquitin-dependent protein catabolic process)	ko00970(Aminoacyl-tRNA biosynthesis)
eun-MIR530-p5_2ss3AT17CA	XM_016598001.1	XM_016598001.1	ASAT1	-	712-729	2	GO:0005515(protein binding);GO:0008150(biological_process);GO:0008374(O-acyltransferase activity);GO:0009507(chloroplast);GO:0016021(integral component of membrane);GO:0016127(sterol catabolic process);GO:0016746(transferase activity, transferring acyl groups);GO:0034434(sterol esterification)
eun-MIR530-p5_2ss3AT17CA	XM_016582949.1	XM_016582949.1	-	-	1202-1219	2.5	GO:0000462(maturation of SSU-rRNA from tricistronic rRNA transcript );GO:0000479(endonucleolytic cleavage of tricistronic rRNA transcript );GO:0003924(GTPase activity);GO:0005525(GTP binding);GO:0030688(preribosome, small subunit precursor);GO:0034511(U3 snoRNA binding)
eun-MIR530-p5_2ss3AT17CA	XM_016651763.1	XM_016651763.1	-	-	1164-1181	2	GO:0015194(L-serine transmembrane transporter activity);GO:0016021(integral component of membrane)
eun-MIR530-p5_2ss3AT17CA	XM_016651761.1	XM_016651761.1	-	-	1232-1249	2	GO:0015194(L-serine transmembrane transporter activity);GO:0016021(integral component of membrane)
eun-MIR530-p5_2ss3AT17CA	XM_016651760.1	XM_016651760.1	-	-	1168-1185	2	GO:0015194(L-serine transmembrane transporter activity);GO:0016021(integral component of membrane)
eun-MIR530-p5_2ss3AT17CA	XM_016651758.1	XM_016651758.1	-	-	1532-1549	2	GO:0015194(L-serine transmembrane transporter activity);GO:0016021(integral component of membrane)
eun-MIR530-p5_2ss3AT17CA	XM_016651759.1	XM_016651759.1	-	-	1306-1323	2	GO:0015194(L-serine transmembrane transporter activity);GO:0016021(integral component of membrane)
eun-MIR530-p5_2ss3AT17CA	XM_016651762.1	XM_016651762.1	-	-	1295-1312	2	GO:0015194(L-serine transmembrane transporter activity);GO:0016021(integral component of membrane)
eun-MIR530-p5_2ss3AT17CA	XM_016652075.1	XM_016652075.1	SPPL4	-	220-237	2.2	GO:0005765(lysosomal membrane);GO:0006465(signal peptide processing);GO:0030660(Golgi-associated vesicle membrane);GO:0033619(membrane protein proteolysis);GO:0042500(aspartic endopeptidase activity, intramembrane cleaving);GO:0071458(integral component of cytoplasmic side of endoplasmic reticulum membrane);GO:0071556(integral component of lumenal side of endoplasmic reticulum membrane)
eun-MIR530-p5_2ss3AT17CA	XM_016614494.1				328-345	2.2	-
eun-MIR530-p5_2ss3AT17CA	XM_016614943.1	XM_016614943.1	-	-	569-586	2.5	GO:0003674(molecular_function);GO:0008150(biological_process);GO:0009507(chloroplast);GO:0016021(integral component of membrane)
eun-MIR530-p5_2ss3AT17CA	XM_016635747.1	XM_016635747.1	AATL1	hypothetical protein	1806-1823	2.2	GO:0003333(amino acid transmembrane transport);GO:0015171(amino acid transmembrane transporter activity)	ko04144(Endocytosis)
eun-MIR530-p5_2ss3AT17CA	XM_016601131.1	XM_016601131.1	-	-	1353-1370	2	GO:0003333(amino acid transmembrane transport);GO:0015171(amino acid transmembrane transporter activity)
eun-MIR530-p5_2ss3AT17CA	XM_016601392.1	XM_016601392.1	IGHMBP2	-	59-76	2	GO:0003677(DNA binding);GO:0004386(helicase activity);GO:0005524(ATP binding);GO:0005634(nucleus)
eun-MIR530-p5_2ss3AT17CA	XM_016601492.1	XM_016601492.1	tipin	-	390-407	2.5	GO:0003676(nucleic acid binding);GO:0005634(nucleus);GO:0006974(cellular response to DNA damage stimulus);GO:0007049(cell cycle);GO:0008270(zinc ion binding);GO:0048478(replication fork protection)
eun-MIR530-p5_2ss3AT17CA	XM_016639056.1	XM_016639056.1	-	transcription factor HBP-1b(c1)-like	141-158	2.5	GO:0005634(nucleus);GO:0006351(transcription, DNA-templated);GO:0043565(sequence-specific DNA binding)	ko04075(Plant hormone signal transduction)
eun-MIR530-p5_2ss3AT17CA	XM_016616893.1	XM_016616893.1	SPPL4	-	195-212	2.2	GO:0005765(lysosomal membrane);GO:0006465(signal peptide processing);GO:0030660(Golgi-associated vesicle membrane);GO:0033619(membrane protein proteolysis);GO:0042500(aspartic endopeptidase activity, intramembrane cleaving);GO:0071458(integral component of cytoplasmic side of endoplasmic reticulum membrane);GO:0071556(integral component of lumenal side of endoplasmic reticulum membrane)
eun-MIR530-p5_2ss3AT17CA	XM_016616998.1	XM_016616998.1	BUB1	-	1666-1683	2.5	GO:0000777(condensed chromosome kinetochore);GO:0004674(protein serine/threonine kinase activity);GO:0005524(ATP binding);GO:0005634(nucleus);GO:0006468(protein phosphorylation);GO:0006915(apoptotic process);GO:0007059(chromosome segregation);GO:0007067(mitotic nuclear division);GO:0007094(mitotic spindle assembly checkpoint);GO:0051301(cell division)
eun-MIR530-p5_2ss3AT17CA	XM_016602130.1	XM_016602130.1	At5g04160	vacuolar protein sorting-associated protein 45 homolog	1310-1327	2.5	GO:0008514(organic anion transmembrane transporter activity);GO:0008643(carbohydrate transport);GO:0016021(integral component of membrane)	ko04144(Endocytosis)
eun-MIR530-p5_2ss3AT17CA	XM_016632855.1	XM_016632855.1	-	-	790-807	2.5	GO:0003674(molecular_function);GO:0005739(mitochondrion);GO:0008150(biological_process)
eun-MIR530-p5_2ss3AT17CA	XM_016602743.1	XM_016602743.1	-	-	386-403	2	GO:0005634(nucleus);GO:0005737(cytoplasm);GO:0008408(3'-5' exonuclease activity)
eun-MIR530-p5_2ss3AT17CA	XM_016602743.1	XM_016602743.1	-	-	305-322	2	GO:0005634(nucleus);GO:0005737(cytoplasm);GO:0008408(3'-5' exonuclease activity)
eun-MIR530-p5_2ss3AT17CA	XM_016640293.1	XM_016640293.1	At5g41330	-	1642-1659	2.5	GO:0005249(voltage-gated potassium channel activity);GO:0005634(nucleus);GO:0006813(potassium ion transport);GO:0008076(voltage-gated potassium channel complex);GO:0016020(membrane);GO:0016567(protein ubiquitination);GO:0051260(protein homooligomerization)
eun-MIR530-p5_2ss3AT17CA	XM_016587613.1	XM_016587613.1	-	-	633-650	2.5	GO:0003674(molecular_function);GO:0008150(biological_process);GO:0009507(chloroplast);GO:0016021(integral component of membrane)
eun-MIR530-p5_2ss3AT17CA	XM_016635808.1	XM_016635808.1	-	NAD-dependent malic enzyme 62 kDa isoform	149-166	2	GO:0004470(malic enzyme activity);GO:0004471(malate dehydrogenase );GO:0005515(protein binding);GO:0005524(ATP binding);GO:0005739(mitochondrion);GO:0006108(malate metabolic process);GO:0008270(zinc ion binding);GO:0008948(oxaloacetate decarboxylase activity);GO:0009507(chloroplast);GO:0009651(response to salt stress);GO:0016652(oxidoreductase activity, acting on NAD);GO:0042803(protein homodimer…	ko01200(Carbon metabolism);ko00620(Pyruvate metabolism);ko00710(Carbon fixation in photosynthetic organisms)
eun-MIR530-p5_2ss3AT17CA	XM_016642764.1	XM_016642764.1	rglB	-	428-445	2.5	GO:0005576(extracellular region);GO:0005975(carbohydrate metabolic process);GO:0016829(lyase activity);GO:0030246(carbohydrate binding)
eun-MIR530-p5_2ss3AT17CA	XM_016605818.1	XM_016605818.1	sen1	Regulator of nonsense transcripts 1-like protein	5801-5818	2	GO:0005634(nucleus);GO:0008150(biological_process);GO:0009506(plasmodesma);GO:0016787(hydrolase activity)	ko03013(RNA transport);ko03015(mRNA surveillance pathway)
eun-MIR530-p5_2ss3AT17CA	XM_016643311.1	XM_016643311.1	At4g32285	-	1371-1388	2.5	GO:0005545(1-phosphatidylinositol binding);GO:0005634(nucleus);GO:0005794(Golgi apparatus);GO:0005829(cytosol);GO:0005886(plasma membrane);GO:0005905(clathrin-coated pit);GO:0006897(endocytosis);GO:0030136(clathrin-coated vesicle);GO:0030276(clathrin binding);GO:0048268(clathrin coat assembly)
eun-MIR530-p5_2ss3AT17CA	XM_016643725.1	XM_016643725.1	At3g05150	-	604-621	2.5	GO:0005351(sugar:proton symporter activity);GO:0005355(glucose transmembrane transporter activity);GO:0005887(integral component of plasma membrane);GO:0035428(hexose transmembrane transport);GO:0046323(glucose import)
eun-MIR530-p5_2ss3AT17CA	XM_016643724.1	XM_016643724.1	At3g05150	-	716-733	2.5	GO:0005351(sugar:proton symporter activity);GO:0005355(glucose transmembrane transporter activity);GO:0005887(integral component of plasma membrane);GO:0035428(hexose transmembrane transport);GO:0046323(glucose import)
eun-MIR530-p5_2ss3AT17CA	XM_016659887.1	XM_016659887.1	-	eukaryotic translation initiation factor 3 subunit C-like	287-304	2.5	GO:0008150(biological_process);GO:0016757(transferase activity, transferring glycosyl groups)	ko03013(RNA transport)
eun-MIR530-p5_2ss3AT17CA	XM_016606969.1	XM_016606969.1	TET4	-	437-454	2.5	GO:0005576(extracellular region);GO:0007568(aging);GO:0016021(integral component of membrane)
eun-MIR530-p5_2ss3AT17CA	XM_016606968.1	XM_016606968.1	TET4	-	436-453	2.5	GO:0005576(extracellular region);GO:0007568(aging);GO:0016021(integral component of membrane)
bdi-MIR7756-p5_2ss15AC20AT	XM_016647938.1	XM_016647938.1	GLR2.7	-	331-350	2.5	GO:0004970(ionotropic glutamate receptor activity);GO:0005217(intracellular ligand-gated ion channel activity);GO:0005634(nucleus);GO:0005773(vacuole);GO:0006874(cellular calcium ion homeostasis);GO:0009416(response to light stimulus);GO:0016021(integral component of membrane)
bdi-MIR7756-p5_2ss15AC20AT	XM_016648096.1	XM_016648096.1	TIP2-1	-	301-321	2.5	GO:0005887(integral component of plasma membrane);GO:0009705(plant-type vacuole membrane);GO:0009992(cellular water homeostasis);GO:0015250(water channel activity);GO:0015254(glycerol channel activity);GO:0034220(ion transmembrane transport);GO:0042807(central vacuole)
bdi-MIR7756-p5_2ss15AC20AT	XM_016610855.1	XM_016610855.1	-	short-chain type dehydrogenase/reductase-like	402-422	2.2	GO:0009507(chloroplast);GO:0016491(oxidoreductase activity);GO:0055114(oxidation-reduction process)	ko01212(Fatty acid metabolism);ko00061(Fatty acid biosynthesis);ko01040(Biosynthesis of unsaturated fatty acids);ko00780(Biotin metabolism)
bdi-MIR7756-p5_2ss15AC20AT	XM_016626355.1	XM_016626355.1	AMPP	-	1532-1552	1.8	GO:0004177(aminopeptidase activity);GO:0006508(proteolysis);GO:0009507(chloroplast);GO:0009570(chloroplast stroma);GO:0016787(hydrolase activity);GO:0046872(metal ion binding)
bdi-MIR7756-p5_2ss15AC20AT	XM_016649918.1				367-387	0	-
bdi-MIR7756-p5_2ss15AC20AT	XM_016583668.1	XM_016583668.1	At5g51380	-	195-214	2.5	GO:0005634(nucleus)
bdi-MIR7756-p5_2ss15AC20AT	XM_016599226.1	XM_016599226.1	yqgM	-	1826-1846	2.2	GO:0005634(nucleus);GO:0016021(integral component of membrane);GO:0016740(transferase activity);GO:0016757(transferase activity, transferring glycosyl groups)
bdi-MIR7756-p5_2ss15AC20AT	XM_016630458.1	XM_016630458.1	AMPP	-	792-812	1.2	GO:0004177(aminopeptidase activity);GO:0006508(proteolysis);GO:0009507(chloroplast);GO:0009570(chloroplast stroma);GO:0016787(hydrolase activity);GO:0046872(metal ion binding)
bdi-MIR7756-p5_2ss15AC20AT	XM_016585570.1	XM_016585570.1	EIF(ISO)4G1	uncharacterized LOC102580933	255-274	2.5	GO:0003723(RNA binding);GO:0003743(translation initiation factor activity);GO:0005634(nucleus);GO:0005737(cytoplasm);GO:0005829(cytosol);GO:0006412(translation);GO:0006413(translational initiation);GO:0006417(regulation of translation)	ko03013(RNA transport)
bdi-MIR7756-p5_2ss15AC20AT	XM_016657199.1	XM_016657199.1	PSL4	glucosidase 2 subunit beta	1208-1228	2.5	GO:0005576(extracellular region);GO:0016021(integral component of membrane);GO:0016301(kinase activity);GO:0016310(phosphorylation)	ko04141(Protein processing in endoplasmic reticulum)
bdi-MIR7756-p5_2ss15AC20AT	XM_016657201.1	XM_016657201.1	PSL4	glucosidase 2 subunit beta	1110-1130	2.5	GO:0005576(extracellular region);GO:0016021(integral component of membrane);GO:0016301(kinase activity);GO:0016310(phosphorylation)	ko04141(Protein processing in endoplasmic reticulum)
bdi-MIR7756-p5_2ss15AC20AT	XM_016657200.1	XM_016657200.1	PSL4	glucosidase 2 subunit beta	1123-1143	2.5	GO:0005576(extracellular region);GO:0016021(integral component of membrane);GO:0016301(kinase activity);GO:0016310(phosphorylation)	ko04141(Protein processing in endoplasmic reticulum)
bdi-MIR7756-p5_2ss15AC20AT	XM_016641988.1	XM_016641988.1	-	-	137-157	2.5	GO:0005739(mitochondrion);GO:0008150(biological_process);GO:0016021(integral component of membrane);GO:0016787(hydrolase activity)
bdi-MIR7756-p5_2ss15AC20AT	XM_016589311.1	XM_016589311.1	-	uncharacterized LOC104808371	562-581	2.2	GO:0003674(molecular_function);GO:0005575(cellular_component);GO:0008150(biological_process)	ko00040(Pentose and glucuronate interconversions);ko00052(Galactose metabolism);ko00053(Ascorbate and aldarate metabolism);ko00520(Amino sugar and nucleotide sugar metabolism)
bdi-MIR7756-p5_2ss15AC20AT	XM_016606499.1	XM_016606499.1	At5g51380	hypothetical protein	196-215	2.5	GO:0005634(nucleus)	ko04120(Ubiquitin mediated proteolysis)
rgl-miR7972_R+1_1ss14TG	XM_016597404.1	XM_016597404.1	PCMP-E16	pentatricopeptide repeat-containing protein At2g04860	524-546	2.2	GO:0003674(molecular_function);GO:0005739(mitochondrion);GO:0008150(biological_process)	ko00500(Starch and sucrose metabolism)
rgl-miR7972_R+1_1ss14TG	XM_016614270.1	XM_016614270.1	ROS1	-	925-946	1	GO:0003677(DNA binding);GO:0003906(DNA-);GO:0005515(protein binding);GO:0005634(nucleus);GO:0005730(nucleolus);GO:0006281(DNA repair);GO:0006284(base-excision repair);GO:0006306(DNA methylation);GO:0006342(chromatin silencing);GO:0006351(transcription, DNA-templated);GO:0019104(DNA N-glycosylase activity);GO:0031936(negative regulation of chromatin silencing);GO:0046872(metal ion binding);GO:0051…
rgl-miR7972_R+1_1ss14TG	XM_016614271.1	XM_016614271.1	ROS1	-	925-946	1	GO:0003677(DNA binding);GO:0003906(DNA-);GO:0005515(protein binding);GO:0005634(nucleus);GO:0005730(nucleolus);GO:0006281(DNA repair);GO:0006284(base-excision repair);GO:0006306(DNA methylation);GO:0006342(chromatin silencing);GO:0006351(transcription, DNA-templated);GO:0019104(DNA N-glycosylase activity);GO:0031936(negative regulation of chromatin silencing);GO:0046872(metal ion binding);GO:0051…
rgl-miR7972_R+1_1ss14TG	XM_016638632.1	XM_016638632.1	ROS1	-	1194-1215	1.2	GO:0003677(DNA binding);GO:0003906(DNA-);GO:0005515(protein binding);GO:0005634(nucleus);GO:0005730(nucleolus);GO:0006281(DNA repair);GO:0006284(base-excision repair);GO:0006306(DNA methylation);GO:0006342(chromatin silencing);GO:0006351(transcription, DNA-templated);GO:0019104(DNA N-glycosylase activity);GO:0031936(negative regulation of chromatin silencing);GO:0046872(metal ion binding);GO:0051…
rgl-miR7972_R+1_1ss14TG	XM_016638634.1	XM_016638634.1	ROS1	-	1044-1065	1.2	GO:0003677(DNA binding);GO:0003906(DNA-);GO:0005515(protein binding);GO:0005634(nucleus);GO:0005730(nucleolus);GO:0006281(DNA repair);GO:0006284(base-excision repair);GO:0006306(DNA methylation);GO:0006342(chromatin silencing);GO:0006351(transcription, DNA-templated);GO:0019104(DNA N-glycosylase activity);GO:0031936(negative regulation of chromatin silencing);GO:0046872(metal ion binding);GO:0051…
rgl-miR7972_R+1_1ss14TG	XM_016638631.1	XM_016638631.1	ROS1	-	1181-1202	1.2	GO:0003677(DNA binding);GO:0003906(DNA-);GO:0005515(protein binding);GO:0005634(nucleus);GO:0005730(nucleolus);GO:0006281(DNA repair);GO:0006284(base-excision repair);GO:0006306(DNA methylation);GO:0006342(chromatin silencing);GO:0006351(transcription, DNA-templated);GO:0019104(DNA N-glycosylase activity);GO:0031936(negative regulation of chromatin silencing);GO:0046872(metal ion binding);GO:0051…
rgl-miR7972_R+1_1ss14TG	XM_016638633.1	XM_016638633.1	ROS1	-	1031-1052	1.2	GO:0003677(DNA binding);GO:0003906(DNA-);GO:0005515(protein binding);GO:0005634(nucleus);GO:0005730(nucleolus);GO:0006281(DNA repair);GO:0006284(base-excision repair);GO:0006306(DNA methylation);GO:0006342(chromatin silencing);GO:0006351(transcription, DNA-templated);GO:0019104(DNA N-glycosylase activity);GO:0031936(negative regulation of chromatin silencing);GO:0046872(metal ion binding);GO:0051…
rgl-miR7972_R+1_1ss14TG	XM_016633188.1	XM_016633188.1	ROS1	-	1112-1133	1.5	GO:0003677(DNA binding);GO:0003906(DNA-);GO:0005515(protein binding);GO:0005634(nucleus);GO:0005730(nucleolus);GO:0006281(DNA repair);GO:0006284(base-excision repair);GO:0006306(DNA methylation);GO:0006342(chromatin silencing);GO:0006351(transcription, DNA-templated);GO:0019104(DNA N-glycosylase activity);GO:0031936(negative regulation of chromatin silencing);GO:0046872(metal ion binding);GO:0051…
rgl-miR7972_R+1_1ss14TG	XM_016603774.1	XM_016603774.1	-	-	1144-1165	1.5	-
rgl-miR7972_R+1_1ss14TG	XM_016590610.1	XM_016590610.1	PCMP-E16	pentatricopeptide repeat-containing protein At2g04860	372-392	2.2	GO:0003674(molecular_function);GO:0005739(mitochondrion);GO:0008150(biological_process)	ko00500(Starch and sucrose metabolism)
stu-MIR7997a-p5_2ss11CT19TG	XM_016660389.1	XM_016660389.1	-	-	1553-1576	2.2	GO:0003674(molecular_function);GO:0005634(nucleus);GO:0008150(biological_process)
stu-MIR7997a-p5_2ss11CT19TG	XM_016644311.1	XM_016644311.1	ext1a	-	2054-2077	1.8	GO:0003824(catalytic activity);GO:0005768(endosome);GO:0005794(Golgi apparatus);GO:0005802(trans-Golgi network);GO:0008150(biological_process);GO:0016020(membrane);GO:0016740(transferase activity)
stu-MIR7997a-p5_2ss11CT19TG	XM_016627392.1	XM_016627392.1	At5g20260	DHFS-FPGS B family protein	2023-2046	2	GO:0003824(catalytic activity);GO:0005768(endosome);GO:0005794(Golgi apparatus);GO:0005802(trans-Golgi network);GO:0008150(biological_process);GO:0016020(membrane);GO:0016740(transferase activity)	ko00790(Folate biosynthesis)
stu-MIR7997a-p5_2ss11CT19TG	XM_016627393.1	XM_016627393.1	At5g20260	DHFS-FPGS B family protein	1932-1955	2	GO:0003824(catalytic activity);GO:0005768(endosome);GO:0005794(Golgi apparatus);GO:0005802(trans-Golgi network);GO:0008150(biological_process);GO:0016020(membrane);GO:0016740(transferase activity)	ko00790(Folate biosynthesis)
stu-MIR7997a-p5_2ss11CT19TG	XM_016651591.1	XM_016651591.1	DOF3.7	cycling DOF factor 1	389-412	2.5	GO:0003677(DNA binding);GO:0003700(transcription factor activity, sequence-specific DNA binding);GO:0005634(nucleus);GO:0006351(transcription, DNA-templated);GO:0006355(regulation of transcription, DNA-templated);GO:0009639(response to red or far red light);GO:0009845(seed germination);GO:0044212(transcription regulatory region DNA binding);GO:0046872(metal ion binding)	ko04712(Circadian rhythm - plant)
stu-MIR7997a-p5_2ss11CT19TG	XM_016583542.1	XM_016583542.1	-	-	812-835	1.8	GO:0003674(molecular_function);GO:0005634(nucleus);GO:0006979(response to oxidative stress)
stu-MIR7997a-p5_2ss11CT19TG	XM_016599465.1	XM_016599465.1	At3g23880	Phenylalanyl-tRNA synthetase class IIc family protein	2142-2165	1.5	GO:0004842(ubiquitin-protein transferase activity);GO:0019005(SCF ubiquitin ligase complex);GO:0031146(SCF-dependent proteasomal ubiquitin-dependent protein catabolic process)	ko00970(Aminoacyl-tRNA biosynthesis)
stu-MIR7997a-p5_2ss11CT19TG	XM_016599464.1	XM_016599464.1	At3g23880	Phenylalanyl-tRNA synthetase class IIc family protein	1929-1952	1.5	GO:0004842(ubiquitin-protein transferase activity);GO:0019005(SCF ubiquitin ligase complex);GO:0031146(SCF-dependent proteasomal ubiquitin-dependent protein catabolic process)	ko00970(Aminoacyl-tRNA biosynthesis)
stu-MIR7997a-p5_2ss11CT19TG	XM_016584705.1	XM_016584705.1	-	clathrin interactor EPSIN 1	899-922	2.2	GO:0005739(mitochondrion);GO:0005768(endosome);GO:0005794(Golgi apparatus);GO:0005802(trans-Golgi network);GO:0008375(acetylglucosaminyltransferase activity);GO:0016021(integral component of membrane);GO:0016757(transferase activity, transferring glycosyl groups)	ko04144(Endocytosis)
stu-MIR7997a-p5_2ss11CT19TG	XM_016585863.1	XM_016585863.1	-	clathrin interactor EPSIN 1	835-858	2.5	GO:0005739(mitochondrion);GO:0005768(endosome);GO:0005794(Golgi apparatus);GO:0005802(trans-Golgi network);GO:0008375(acetylglucosaminyltransferase activity);GO:0016021(integral component of membrane);GO:0016757(transferase activity, transferring glycosyl groups)	ko04144(Endocytosis)
stu-MIR7997a-p5_2ss11CT19TG	XM_016585864.1	XM_016585864.1	-	clathrin interactor EPSIN 1	822-845	2.5	GO:0005739(mitochondrion);GO:0005768(endosome);GO:0005794(Golgi apparatus);GO:0005802(trans-Golgi network);GO:0008375(acetylglucosaminyltransferase activity);GO:0016021(integral component of membrane);GO:0016757(transferase activity, transferring glycosyl groups)	ko04144(Endocytosis)
stu-MIR7997a-p5_2ss11CT19TG	XM_016585862.1	XM_016585862.1	-	clathrin interactor EPSIN 1	803-826	2.5	GO:0005739(mitochondrion);GO:0005768(endosome);GO:0005794(Golgi apparatus);GO:0005802(trans-Golgi network);GO:0008375(acetylglucosaminyltransferase activity);GO:0016021(integral component of membrane);GO:0016757(transferase activity, transferring glycosyl groups)	ko04144(Endocytosis)
stu-MIR7997a-p5_2ss11CT19TG	XM_016585861.1	XM_016585861.1	-	clathrin interactor EPSIN 1	802-825	2.5	GO:0005739(mitochondrion);GO:0005768(endosome);GO:0005794(Golgi apparatus);GO:0005802(trans-Golgi network);GO:0008375(acetylglucosaminyltransferase activity);GO:0016021(integral component of membrane);GO:0016757(transferase activity, transferring glycosyl groups)	ko04144(Endocytosis)
stu-MIR7997a-p5_2ss11CT19TG	XM_016589052.1	XM_016589052.1	-	-	1919-1942	2.5	GO:0005794(Golgi apparatus);GO:0008150(biological_process);GO:0016021(integral component of membrane);GO:0016740(transferase activity);GO:0016757(transferase activity, transferring glycosyl groups)
stu-MIR7997a-p5_2ss11CT19TG	XM_016642211.1	XM_016642211.1	DAD2	3-hydroxyisobutyryl-CoA hydrolase-like protein 3	1115-1138	1.8	GO:0010223(secondary shoot formation);GO:0016788(hydrolase activity, acting on ester bonds);GO:1901601(strigolactone biosynthetic process)	ko01200(Carbon metabolism);ko00640(Propanoate metabolism);ko00280(Valine, leucine and isoleucine degradation);ko00410(beta-Alanine metabolism)
stu-MIR7997a-p5_2ss11CT19TG	XM_016605505.1	XM_016605505.1	VAMP725	Os03g0803000	445-467	2.5	GO:0000149(SNARE binding);GO:0005484(SNAP receptor activity);GO:0006887(exocytosis);GO:0006906(vesicle fusion);GO:0031201(SNARE complex)	ko04130(SNARE interactions in vesicular transport)
stu-MIR7997a-p5_2ss11CT19TG	XM_016636458.1	XM_016636458.1	VAMP725	Os03g0803000	420-442	2.5	GO:0000149(SNARE binding);GO:0005484(SNAP receptor activity);GO:0006887(exocytosis);GO:0006906(vesicle fusion);GO:0031201(SNARE complex)	ko04130(SNARE interactions in vesicular transport)
stu-MIR7997a-p5_2ss11CT19TG	XM_016659383.1	XM_016659383.1	MTERF15	-	2283-2306	2	GO:0000394(RNA splicing, via endonucleolytic cleavage and ligation);GO:0003690(double-stranded DNA binding);GO:0003723(RNA binding);GO:0005739(mitochondrion);GO:0006355(regulation of transcription, DNA-templated)
bdi-MIR171e-p3	XM_016645116.1	XM_016645116.1	Os08g0500300	-	2524-2543	2.5	GO:0004722(protein serine/threonine phosphatase activity);GO:0005886(plasma membrane);GO:0006470(protein dephosphorylation);GO:0046872(metal ion binding)
bdi-MIR171e-p3	XM_016577663.1	XM_016577663.1	SCL15	DELLA protein GAI1-like	878-899	2	GO:0003700(transcription factor activity, sequence-specific DNA binding);GO:0005634(nucleus);GO:0006355(regulation of transcription, DNA-templated);GO:0030154(cell differentiation);GO:0043565(sequence-specific DNA binding);GO:0048831(regulation of shoot system development)	ko04075(Plant hormone signal transduction)
bdi-MIR171e-p3	XM_016625781.1	XM_016625781.1	SCL6	DELLA protein GAI-like	1707-1727	0.8	GO:0003700(transcription factor activity, sequence-specific DNA binding);GO:0005634(nucleus);GO:0006355(regulation of transcription, DNA-templated);GO:0010492(maintenance of shoot apical meristem identity);GO:0043565(sequence-specific DNA binding);GO:0048768(root hair cell tip growth);GO:0051301(cell division)	ko04075(Plant hormone signal transduction)
bdi-MIR171e-p3	XM_016625782.1	XM_016625782.1	SCL6	DELLA protein GAI-like	1697-1717	0.8	GO:0003700(transcription factor activity, sequence-specific DNA binding);GO:0005634(nucleus);GO:0006355(regulation of transcription, DNA-templated);GO:0010492(maintenance of shoot apical meristem identity);GO:0043565(sequence-specific DNA binding);GO:0048768(root hair cell tip growth);GO:0051301(cell division)	ko04075(Plant hormone signal transduction)
bdi-MIR171e-p3	XM_016588934.1	XM_016588934.1	SCL15	hypothetical protein	891-912	2	GO:0003700(transcription factor activity, sequence-specific DNA binding);GO:0005634(nucleus);GO:0006355(regulation of transcription, DNA-templated);GO:0030154(cell differentiation);GO:0043565(sequence-specific DNA binding);GO:0048831(regulation of shoot system development)	ko04075(Plant hormone signal transduction)
bdi-MIR171e-p3	XM_016582020.1	XM_016582020.1	SCL6	DELLA protein RGL2	1383-1404	1.5	GO:0003700(transcription factor activity, sequence-specific DNA binding);GO:0005634(nucleus);GO:0006355(regulation of transcription, DNA-templated);GO:0030154(cell differentiation);GO:0043565(sequence-specific DNA binding)	ko04075(Plant hormone signal transduction)
bdi-MIR171e-p3	XM_016582022.1	XM_016582022.1	SCL6	DELLA protein RGL2	1299-1320	1.5	GO:0003700(transcription factor activity, sequence-specific DNA binding);GO:0005634(nucleus);GO:0006355(regulation of transcription, DNA-templated);GO:0030154(cell differentiation);GO:0043565(sequence-specific DNA binding)	ko04075(Plant hormone signal transduction)
bdi-MIR171e-p3	XM_016582024.1	XM_016582024.1	SCL6	DELLA protein RGL2	1054-1075	1.5	GO:0003700(transcription factor activity, sequence-specific DNA binding);GO:0005634(nucleus);GO:0006355(regulation of transcription, DNA-templated);GO:0030154(cell differentiation);GO:0043565(sequence-specific DNA binding)	ko04075(Plant hormone signal transduction)
bdi-MIR171e-p3	XM_016582023.1	XM_016582023.1	SCL6	DELLA protein RGL2	1222-1243	1.5	GO:0003700(transcription factor activity, sequence-specific DNA binding);GO:0005634(nucleus);GO:0006355(regulation of transcription, DNA-templated);GO:0030154(cell differentiation);GO:0043565(sequence-specific DNA binding)	ko04075(Plant hormone signal transduction)
bdi-MIR171e-p3	XM_016582267.1	XM_016582267.1	ABCC10	ABC transporter C family member 10-like	4033-4053	2.2	GO:0005524(ATP binding);GO:0005774(vacuolar membrane);GO:0005886(plasma membrane);GO:0008559(xenobiotic-transporting ATPase activity);GO:0016021(integral component of membrane);GO:0042626(ATPase activity, coupled to transmembrane movement of substances)	ko02010(ABC transporters)
bdi-MIR171e-p3	XM_016582268.1	XM_016582268.1	ABCC10	ABC transporter C family member 10-like	4025-4045	2.2	GO:0005524(ATP binding);GO:0005774(vacuolar membrane);GO:0005886(plasma membrane);GO:0008559(xenobiotic-transporting ATPase activity);GO:0016021(integral component of membrane);GO:0042626(ATPase activity, coupled to transmembrane movement of substances)	ko02010(ABC transporters)
bdi-MIR171e-p3	XM_016584434.1	XM_016584434.1	NSP2	hypothetical protein	729-749	2	GO:0003700(transcription factor activity, sequence-specific DNA binding);GO:0005634(nucleus);GO:0006355(regulation of transcription, DNA-templated);GO:0043565(sequence-specific DNA binding)	ko04075(Plant hormone signal transduction)
bdi-MIR171e-p3	XM_016653078.1	XM_016653078.1	PAT1	anthranilate phosphoribosyltransferase	1450-1470	2.5	GO:0000162(tryptophan biosynthetic process);GO:0003824(catalytic activity);GO:0005829(cytosol)	ko01230(Biosynthesis of amino acids);ko00400(Phenylalanine, tyrosine and tryptophan biosynthesis)
bdi-MIR171e-p3	XM_016631827.1	XM_016631827.1	SCL6	DELLA protein RGL2	1372-1393	1.5	GO:0003700(transcription factor activity, sequence-specific DNA binding);GO:0005634(nucleus);GO:0006355(regulation of transcription, DNA-templated);GO:0030154(cell differentiation);GO:0043565(sequence-specific DNA binding)	ko04075(Plant hormone signal transduction)
bdi-MIR171e-p3	XM_016631828.1	XM_016631828.1	SCL6	DELLA protein RGL2	1222-1243	1.5	GO:0003700(transcription factor activity, sequence-specific DNA binding);GO:0005634(nucleus);GO:0006355(regulation of transcription, DNA-templated);GO:0030154(cell differentiation);GO:0043565(sequence-specific DNA binding)	ko04075(Plant hormone signal transduction)
bdi-MIR171e-p3	XM_016586978.1	XM_016586978.1	-	-	612-632	2.5	GO:0005509(calcium ion binding);GO:0005634(nucleus);GO:0005737(cytoplasm);GO:0005829(cytosol);GO:0005886(plasma membrane);GO:0009570(chloroplast stroma);GO:0019904(protein domain specific binding);GO:0045309(protein phosphorylated amino acid binding);GO:0048528(post-embryonic root development)
bdi-MIR171e-p3	XM_016603561.1	XM_016603561.1	NSP2	hypothetical protein	870-890	2.5	GO:0003700(transcription factor activity, sequence-specific DNA binding);GO:0005634(nucleus);GO:0006355(regulation of transcription, DNA-templated);GO:0043565(sequence-specific DNA binding)	ko04075(Plant hormone signal transduction)
bdi-MIR171e-p3	XM_016635528.1	XM_016635528.1	SCL6	hypothetical protein	1683-1703	0.8	GO:0003700(transcription factor activity, sequence-specific DNA binding);GO:0005634(nucleus);GO:0006355(regulation of transcription, DNA-templated);GO:0010492(maintenance of shoot apical meristem identity);GO:0043565(sequence-specific DNA binding);GO:0048768(root hair cell tip growth);GO:0051301(cell division)	ko04075(Plant hormone signal transduction)
bdi-MIR171e-p3	XM_016635712.1	XM_016635712.1	ABCC10	ABC transporter C family member 10-like	4069-4089	2.2	GO:0005524(ATP binding);GO:0005774(vacuolar membrane);GO:0005886(plasma membrane);GO:0008559(xenobiotic-transporting ATPase activity);GO:0016021(integral component of membrane);GO:0042626(ATPase activity, coupled to transmembrane movement of substances)	ko02010(ABC transporters)
bdi-MIR171e-p3	XM_016635713.1	XM_016635713.1	ABCC10	ABC transporter C family member 10-like	4078-4098	2.2	GO:0005524(ATP binding);GO:0005774(vacuolar membrane);GO:0005886(plasma membrane);GO:0008559(xenobiotic-transporting ATPase activity);GO:0016021(integral component of membrane);GO:0042626(ATPase activity, coupled to transmembrane movement of substances)	ko02010(ABC transporters)
gma-MIR6300-p3_1ss12AG	XM_016583449.1	XM_016583449.1	AOP1.2	GMP synthase [glutamine-hydrolyzing]	797-820	0	GO:0051213(dioxygenase activity)	ko00230(Purine metabolism)
gma-MIR6300-p3_1ss12AG	XM_016586647.1	XM_016586647.1	PCMP-H42	pentatricopeptide repeat-containing protein At2g04860	362-385	0	GO:0005739(mitochondrion);GO:0008150(biological_process);GO:0008270(zinc ion binding)	ko00500(Starch and sucrose metabolism)
gma-MIR6300-p3_1ss12AG	XM_016586649.1	XM_016586649.1	PCMP-H42	pentatricopeptide repeat-containing protein At2g04860	362-385	0	GO:0005739(mitochondrion);GO:0008150(biological_process);GO:0008270(zinc ion binding)	ko00500(Starch and sucrose metabolism)
gma-MIR6300-p3_1ss12AG	XM_016586645.1	XM_016586645.1	PCMP-H42	pentatricopeptide repeat-containing protein At2g04860	362-385	0	GO:0005739(mitochondrion);GO:0008150(biological_process);GO:0008270(zinc ion binding)	ko00500(Starch and sucrose metabolism)
gma-MIR6300-p3_1ss12AG	XM_016586648.1	XM_016586648.1	PCMP-H42	pentatricopeptide repeat-containing protein At2g04860	362-385	0	GO:0005739(mitochondrion);GO:0008150(biological_process);GO:0008270(zinc ion binding)	ko00500(Starch and sucrose metabolism)
gma-miR6300_R+2_2	XM_016623993.1	XM_016623993.1	TUBA	tubulin alpha chain-like	81-100	2.5	GO:0000226(microtubule cytoskeleton organization);GO:0003924(GTPase activity);GO:0005200(structural constituent of cytoskeleton);GO:0005515(protein binding);GO:0005525(GTP binding);GO:0005618(cell wall);GO:0005730(nucleolus);GO:0005737(cytoplasm);GO:0005773(vacuole);GO:0005829(cytosol);GO:0005874(microtubule);GO:0005886(plasma membrane);GO:0007017(microtubule-based process);GO:0009506(plasmodesma…	ko04145(Phagosome)
gma-miR6300_R+2_2	XM_016593599.1	XM_016593599.1	STIP1	-	918-937	2.2	GO:0005634(nucleus);GO:0008150(biological_process)
gma-miR6300_R+2_2	XM_016646440.1	XM_016646440.1	YDA	mitogen-activated protein kinase kinase kinase 1-like	3373-3392	2.5	GO:0004702(receptor signaling protein serine/threonine kinase activity);GO:0005737(cytoplasm)	ko04626(Plant-pathogen interaction)
gma-miR6300_R+2_2	XM_016657871.1	XM_016657871.1	APF1	-	583-602	2.5	GO:0004190(aspartic-type endopeptidase activity);GO:0006508(proteolysis);GO:0030163(protein catabolic process)
gma-miR6300_R+2_2	XM_016589539.1	XM_016589539.1	PAT11	-	1144-1163	2.2	GO:0005774(vacuolar membrane);GO:0005886(plasma membrane);GO:0008270(zinc ion binding);GO:0016021(integral component of membrane);GO:0019706(protein-cysteine S-palmitoyltransferase activity)
gma-miR6300_R+2_2	XM_016583449.1	XM_016583449.1	AOP1.2	GMP synthase [glutamine-hydrolyzing]	809-828	0	GO:0051213(dioxygenase activity)	ko00230(Purine metabolism)
gma-miR6300_R+2_2	XM_016584244.1	XM_016584244.1	DDB_G0286581	-	1284-1302	2.5	GO:0005811(lipid particle);GO:0019915(lipid storage)
gma-miR6300_R+2_2	XM_016615551.1	XM_016615551.1	-	-	1504-1523	2.5	-
gma-miR6300_R+2_2	XM_016586647.1	XM_016586647.1	PCMP-H42	pentatricopeptide repeat-containing protein At2g04860	374-393	0	GO:0005739(mitochondrion);GO:0008150(biological_process);GO:0008270(zinc ion binding)	ko00500(Starch and sucrose metabolism)
gma-miR6300_R+2_2	XM_016586649.1	XM_016586649.1	PCMP-H42	pentatricopeptide repeat-containing protein At2g04860	374-393	0	GO:0005739(mitochondrion);GO:0008150(biological_process);GO:0008270(zinc ion binding)	ko00500(Starch and sucrose metabolism)
gma-miR6300_R+2_2	XM_016586645.1	XM_016586645.1	PCMP-H42	pentatricopeptide repeat-containing protein At2g04860	374-393	0	GO:0005739(mitochondrion);GO:0008150(biological_process);GO:0008270(zinc ion binding)	ko00500(Starch and sucrose metabolism)
gma-miR6300_R+2_2	XM_016586648.1	XM_016586648.1	PCMP-H42	pentatricopeptide repeat-containing protein At2g04860	374-393	0	GO:0005739(mitochondrion);GO:0008150(biological_process);GO:0008270(zinc ion binding)	ko00500(Starch and sucrose metabolism)
gma-miR6300_R+2_2	XM_016618196.1	XM_016618196.1	PAT11	-	448-467	2.2	GO:0005774(vacuolar membrane);GO:0005886(plasma membrane);GO:0008270(zinc ion binding);GO:0016021(integral component of membrane);GO:0019706(protein-cysteine S-palmitoyltransferase activity)
gma-miR6300_R+2_2	XM_016604124.1	XM_016604124.1	MCM5	DNA replication licensing factor MCM5	92-111	2.5	GO:0000347(THO complex);GO:0003677(DNA binding);GO:0003678(DNA helicase activity);GO:0003682(chromatin binding);GO:0003688(DNA replication origin binding);GO:0005515(protein binding);GO:0005524(ATP binding);GO:0005634(nucleus);GO:0005737(cytoplasm);GO:0006268(DNA unwinding involved in DNA replication);GO:0006270(DNA replication initiation);GO:0007049(cell cycle);GO:0008094(DNA-dependent ATPase ac…	ko03030(DNA replication)
gma-miR6300_R+2_2	XM_016622702.1	XM_016622702.1	YDA	mitogen-activated protein kinase kinase kinase 1-like	3021-3040	2.5	GO:0004702(receptor signaling protein serine/threonine kinase activity);GO:0005737(cytoplasm)	ko04626(Plant-pathogen interaction)
gma-miR6300_R+2_1	XM_016623993.1	XM_016623993.1	TUBA	tubulin alpha chain-like	80-100	2.5	GO:0000226(microtubule cytoskeleton organization);GO:0003924(GTPase activity);GO:0005200(structural constituent of cytoskeleton);GO:0005515(protein binding);GO:0005525(GTP binding);GO:0005618(cell wall);GO:0005730(nucleolus);GO:0005737(cytoplasm);GO:0005773(vacuole);GO:0005829(cytosol);GO:0005874(microtubule);GO:0005886(plasma membrane);GO:0007017(microtubule-based process);GO:0009506(plasmodesma…	ko04145(Phagosome)
gma-miR6300_R+2_1	XM_016593599.1	XM_016593599.1	STIP1	-	918-937	2	GO:0005634(nucleus);GO:0008150(biological_process)
gma-miR6300_R+2_1	XM_016657871.1	XM_016657871.1	APF1	-	584-602	2.2	GO:0004190(aspartic-type endopeptidase activity);GO:0006508(proteolysis);GO:0030163(protein catabolic process)
gma-miR6300_R+2_1	XM_016649057.1	XM_016649057.1	VIT_19s0014g04930	(-)-germacrene D synthase-like	663-681	2	GO:0010334(sesquiterpene synthase activity);GO:0033383(geranyl diphosphate metabolic process)	ko00909(Sesquiterpenoid and triterpenoid biosynthesis)
gma-miR6300_R+2_1	XM_016583449.1	XM_016583449.1	AOP1.2	GMP synthase [glutamine-hydrolyzing]	808-828	0.5	GO:0051213(dioxygenase activity)	ko00230(Purine metabolism)
gma-miR6300_R+2_1	XM_016615551.1	XM_016615551.1	-	-	1503-1523	2.5	-
gma-miR6300_R+2_1	XM_016586647.1	XM_016586647.1	PCMP-H42	pentatricopeptide repeat-containing protein At2g04860	373-393	0.5	GO:0005739(mitochondrion);GO:0008150(biological_process);GO:0008270(zinc ion binding)	ko00500(Starch and sucrose metabolism)
gma-miR6300_R+2_1	XM_016586649.1	XM_016586649.1	PCMP-H42	pentatricopeptide repeat-containing protein At2g04860	373-393	0.5	GO:0005739(mitochondrion);GO:0008150(biological_process);GO:0008270(zinc ion binding)	ko00500(Starch and sucrose metabolism)
gma-miR6300_R+2_1	XM_016586645.1	XM_016586645.1	PCMP-H42	pentatricopeptide repeat-containing protein At2g04860	373-393	0.5	GO:0005739(mitochondrion);GO:0008150(biological_process);GO:0008270(zinc ion binding)	ko00500(Starch and sucrose metabolism)
gma-miR6300_R+2_1	XM_016586648.1	XM_016586648.1	PCMP-H42	pentatricopeptide repeat-containing protein At2g04860	373-393	0.5	GO:0005739(mitochondrion);GO:0008150(biological_process);GO:0008270(zinc ion binding)	ko00500(Starch and sucrose metabolism)
gma-miR6300_R+2_1	XM_016604124.1	XM_016604124.1	MCM5	DNA replication licensing factor MCM5	92-111	2.5	GO:0000347(THO complex);GO:0003677(DNA binding);GO:0003678(DNA helicase activity);GO:0003682(chromatin binding);GO:0003688(DNA replication origin binding);GO:0005515(protein binding);GO:0005524(ATP binding);GO:0005634(nucleus);GO:0005737(cytoplasm);GO:0006268(DNA unwinding involved in DNA replication);GO:0006270(DNA replication initiation);GO:0007049(cell cycle);GO:0008094(DNA-dependent ATPase ac…	ko03030(DNA replication)
rgl-miR7972_R+3_1ss14TG	XM_016614270.1	XM_016614270.1	ROS1	-	923-946	1	GO:0003677(DNA binding);GO:0003906(DNA-);GO:0005515(protein binding);GO:0005634(nucleus);GO:0005730(nucleolus);GO:0006281(DNA repair);GO:0006284(base-excision repair);GO:0006306(DNA methylation);GO:0006342(chromatin silencing);GO:0006351(transcription, DNA-templated);GO:0019104(DNA N-glycosylase activity);GO:0031936(negative regulation of chromatin silencing);GO:0046872(metal ion binding);GO:0051…
rgl-miR7972_R+3_1ss14TG	XM_016614271.1	XM_016614271.1	ROS1	-	923-946	1	GO:0003677(DNA binding);GO:0003906(DNA-);GO:0005515(protein binding);GO:0005634(nucleus);GO:0005730(nucleolus);GO:0006281(DNA repair);GO:0006284(base-excision repair);GO:0006306(DNA methylation);GO:0006342(chromatin silencing);GO:0006351(transcription, DNA-templated);GO:0019104(DNA N-glycosylase activity);GO:0031936(negative regulation of chromatin silencing);GO:0046872(metal ion binding);GO:0051…
rgl-miR7972_R+3_1ss14TG	XM_016638632.1	XM_016638632.1	ROS1	-	1192-1215	1.2	GO:0003677(DNA binding);GO:0003906(DNA-);GO:0005515(protein binding);GO:0005634(nucleus);GO:0005730(nucleolus);GO:0006281(DNA repair);GO:0006284(base-excision repair);GO:0006306(DNA methylation);GO:0006342(chromatin silencing);GO:0006351(transcription, DNA-templated);GO:0019104(DNA N-glycosylase activity);GO:0031936(negative regulation of chromatin silencing);GO:0046872(metal ion binding);GO:0051…
rgl-miR7972_R+3_1ss14TG	XM_016638634.1	XM_016638634.1	ROS1	-	1042-1065	1.2	GO:0003677(DNA binding);GO:0003906(DNA-);GO:0005515(protein binding);GO:0005634(nucleus);GO:0005730(nucleolus);GO:0006281(DNA repair);GO:0006284(base-excision repair);GO:0006306(DNA methylation);GO:0006342(chromatin silencing);GO:0006351(transcription, DNA-templated);GO:0019104(DNA N-glycosylase activity);GO:0031936(negative regulation of chromatin silencing);GO:0046872(metal ion binding);GO:0051…
rgl-miR7972_R+3_1ss14TG	XM_016638631.1	XM_016638631.1	ROS1	-	1179-1202	1.2	GO:0003677(DNA binding);GO:0003906(DNA-);GO:0005515(protein binding);GO:0005634(nucleus);GO:0005730(nucleolus);GO:0006281(DNA repair);GO:0006284(base-excision repair);GO:0006306(DNA methylation);GO:0006342(chromatin silencing);GO:0006351(transcription, DNA-templated);GO:0019104(DNA N-glycosylase activity);GO:0031936(negative regulation of chromatin silencing);GO:0046872(metal ion binding);GO:0051…
rgl-miR7972_R+3_1ss14TG	XM_016638633.1	XM_016638633.1	ROS1	-	1029-1052	1.2	GO:0003677(DNA binding);GO:0003906(DNA-);GO:0005515(protein binding);GO:0005634(nucleus);GO:0005730(nucleolus);GO:0006281(DNA repair);GO:0006284(base-excision repair);GO:0006306(DNA methylation);GO:0006342(chromatin silencing);GO:0006351(transcription, DNA-templated);GO:0019104(DNA N-glycosylase activity);GO:0031936(negative regulation of chromatin silencing);GO:0046872(metal ion binding);GO:0051…
rgl-miR7972_R+3_1ss14TG	XM_016633188.1	XM_016633188.1	ROS1	-	1110-1133	1.5	GO:0003677(DNA binding);GO:0003906(DNA-);GO:0005515(protein binding);GO:0005634(nucleus);GO:0005730(nucleolus);GO:0006281(DNA repair);GO:0006284(base-excision repair);GO:0006306(DNA methylation);GO:0006342(chromatin silencing);GO:0006351(transcription, DNA-templated);GO:0019104(DNA N-glycosylase activity);GO:0031936(negative regulation of chromatin silencing);GO:0046872(metal ion binding);GO:0051…
rgl-miR7972_R+3_1ss14TG	XM_016603774.1	XM_016603774.1	-	-	1142-1165	1.5	-
sly-MIR7981d-p5_1ss8TC	XM_016651267.1	XM_016651267.1	TMK4	PTI1-like tyrosine-protein kinase 3	212-234	2.2	GO:0004672(protein kinase activity);GO:0004674(protein serine/threonine kinase activity);GO:0005524(ATP binding);GO:0005576(extracellular region);GO:0005794(Golgi apparatus);GO:0005829(cytosol);GO:0005886(plasma membrane);GO:0006468(protein phosphorylation);GO:0009506(plasmodesma);GO:0016021(integral component of membrane)	ko04626(Plant-pathogen interaction)
sly-MIR7981d-p5_1ss8TC	XM_016653049.1	XM_016653049.1	At1g27190	systemin receptor SR160-like	542-564	2.2	GO:0004672(protein kinase activity);GO:0004674(protein serine/threonine kinase activity);GO:0005524(ATP binding);GO:0005576(extracellular region);GO:0005634(nucleus);GO:0005886(plasma membrane);GO:0006468(protein phosphorylation);GO:0007169(transmembrane receptor protein tyrosine kinase signaling pathway);GO:0016021(integral component of membrane);GO:0016301(kinase activity)	ko04075(Plant hormone signal transduction)
sly-MIR7981d-p5_1ss8TC	XM_016654410.1	XM_016654410.1	TMK4	serine/threonine-protein kinase PBS1-like	366-388	1.2	GO:0004672(protein kinase activity);GO:0004674(protein serine/threonine kinase activity);GO:0005524(ATP binding);GO:0005576(extracellular region);GO:0005794(Golgi apparatus);GO:0005829(cytosol);GO:0005886(plasma membrane);GO:0006468(protein phosphorylation);GO:0009506(plasmodesma);GO:0016021(integral component of membrane)	ko04626(Plant-pathogen interaction)
sly-MIR9479-p3_2ss22GA24TG	XM_016660421.1	XM_016660421.1	GTE8	transcription initiation factor TFIID subunit 1-like	2559-2582	2.5	GO:0003677(DNA binding);GO:0005634(nucleus);GO:0006351(transcription, DNA-templated);GO:0006355(regulation of transcription, DNA-templated);GO:0009507(chloroplast)	ko03022(Basal transcription factors)
sly-MIR9479-p3_2ss22GA24TG	XM_016623704.1	XM_016623704.1	AGD3	ADP-ribosylation factor GTPase-activating protein AGD3-like	96-119	2.5	GO:0005096(GTPase activator activity);GO:0005515(protein binding);GO:0005794(Golgi apparatus);GO:0005829(cytosol);GO:0005886(plasma membrane);GO:0006897(endocytosis);GO:0009733(response to auxin);GO:0009965(leaf morphogenesis);GO:0010051(xylem and phloem pattern formation);GO:0010087(phloem or xylem histogenesis);GO:0030140(trans-Golgi network transport vesicle);GO:0035091(phosphatidylinositol bi…	ko04144(Endocytosis)
sly-MIR9479-p3_2ss22GA24TG	XM_016623811.1	XM_016623811.1	-	-	564-587	0.8	GO:0005739(mitochondrion);GO:0010073(meristem maintenance);GO:1901703(protein localization involved in auxin polar transport)
sly-MIR9479-p3_2ss22GA24TG	XM_016594137.1	XM_016594137.1	MEE12	-	302-325	1.5	GO:0001164(RNA polymerase I CORE element sequence-specific DNA binding);GO:0001187(transcription factor activity, RNA polymerase I CORE element binding transcription factor recruiting);GO:0005668(RNA polymerase transcription factor SL1 complex);GO:0070860(RNA polymerase I core factor complex)
sly-MIR9479-p3_2ss22GA24TG	XM_016578928.1	XM_016578928.1	DEGP9	-	2159-2181	2.2	GO:0004252(serine-type endopeptidase activity);GO:0005730(nucleolus);GO:0005739(mitochondrion);GO:0006508(proteolysis);GO:0008236(serine-type peptidase activity);GO:0009507(chloroplast)
sly-MIR9479-p3_2ss22GA24TG	XM_016579376.1	XM_016579376.1	-	-	668-690	2.5	GO:0003674(molecular_function);GO:0005575(cellular_component);GO:0008150(biological_process)
sly-MIR9479-p3_2ss22GA24TG	XM_016595622.1	XM_016595622.1	APC2	anaphase-promoting complex subunit 2	3350-3373	2.5	GO:0005680(anaphase-promoting complex);GO:0031625(ubiquitin protein ligase binding);GO:0042787(protein ubiquitination involved in ubiquitin-dependent protein catabolic process);GO:0061630(ubiquitin protein ligase activity)	ko04120(Ubiquitin mediated proteolysis)
sly-MIR9479-p3_2ss22GA24TG	XM_016612458.1	XM_016612458.1	SKOR	-	552-575	1.5	GO:0005249(voltage-gated potassium channel activity);GO:0005887(integral component of plasma membrane);GO:0042391(regulation of membrane potential)
sly-MIR9479-p3_2ss22GA24TG	XM_016614000.1	XM_016614000.1	SPBC119.09c	-	607-629	1.8	GO:0003674(molecular_function);GO:0005739(mitochondrion);GO:0005783(endoplasmic reticulum);GO:0005789(endoplasmic reticulum membrane);GO:0006457(protein folding);GO:0016021(integral component of membrane)
sly-MIR9479-p3_2ss22GA24TG	XM_016613999.1	XM_016613999.1	SPBC119.09c	-	607-629	1.8	GO:0003674(molecular_function);GO:0005739(mitochondrion);GO:0005783(endoplasmic reticulum);GO:0005789(endoplasmic reticulum membrane);GO:0006457(protein folding);GO:0016021(integral component of membrane)
sly-MIR9479-p3_2ss22GA24TG	XM_016622275.1	XM_016622275.1	WDR44	transducin family protein / WD-40 repeat family protein	3487-3509	1.2	GO:0004871(signal transducer activity);GO:0005737(cytoplasm);GO:0005834(heterotrimeric G-protein complex);GO:0007165(signal transduction)	ko03008(Ribosome biogenesis in eukaryotes)
sly-MIR9479-p3_2ss22GA24TG	XM_016627936.1	XM_016627936.1	APC2	anaphase-promoting complex subunit 2	4270-4293	2	GO:0005680(anaphase-promoting complex);GO:0031625(ubiquitin protein ligase binding);GO:0042787(protein ubiquitination involved in ubiquitin-dependent protein catabolic process);GO:0061630(ubiquitin protein ligase activity)	ko04120(Ubiquitin mediated proteolysis)
sly-MIR9479-p3_2ss22GA24TG	XM_016638744.1	XM_016638744.1	THE1	serine/threonine-protein kinase NAK	283-305	2	GO:0004672(protein kinase activity);GO:0004674(protein serine/threonine kinase activity);GO:0005524(ATP binding);GO:0005576(extracellular region);GO:0005886(plasma membrane);GO:0009506(plasmodesma);GO:0009741(response to brassinosteroid);GO:0009742(brassinosteroid mediated signaling pathway);GO:0009791(post-embryonic development);GO:0009826(unidimensional cell growth);GO:0016021(integral componen…	ko04626(Plant-pathogen interaction)
sly-MIR9479-p3_2ss22GA24TG	XM_016601969.1	XM_016601969.1	GIP	ADP-ribosylation factor GTPase-activating protein AGD12-like	716-739	2.2	GO:0004596(peptide alpha-N-acetyltransferase activity);GO:0005737(cytoplasm);GO:0017196(N-terminal peptidyl-methionine acetylation)	ko04144(Endocytosis)
sly-MIR9479-p3_2ss22GA24TG	XM_016619981.1	XM_016619981.1	CCX4	-	3533-3555	2	GO:0006812(cation transport);GO:0006813(potassium ion transport);GO:0006814(sodium ion transport);GO:0015297(antiporter activity);GO:0015491(cation:cation antiporter activity);GO:0016021(integral component of membrane);GO:0055085(transmembrane transport)
sly-MIR9479-p3_2ss22GA24TG	XM_016619980.1	XM_016619980.1	CCX4	-	7595-7617	2	GO:0006812(cation transport);GO:0006813(potassium ion transport);GO:0006814(sodium ion transport);GO:0015297(antiporter activity);GO:0015491(cation:cation antiporter activity);GO:0016021(integral component of membrane);GO:0055085(transmembrane transport)
sly-MIR9479-p3_2ss22GA24TG	XM_016589777.1	XM_016589777.1	GBF1	-	4-27	1.5	GO:0003677(DNA binding);GO:0003700(transcription factor activity, sequence-specific DNA binding);GO:0005634(nucleus);GO:0005737(cytoplasm);GO:0006351(transcription, DNA-templated);GO:0006355(regulation of transcription, DNA-templated);GO:0010310(regulation of hydrogen peroxide metabolic process);GO:0010629(negative regulation of gene expression);GO:0043565(sequence-specific DNA binding);GO:004421…
sly-MIR9479-p3_2ss22GA24TG	XM_016590239.1	XM_016590239.1	WDR44	-	3263-3285	1.2	GO:0004871(signal transducer activity);GO:0005737(cytoplasm);GO:0005834(heterotrimeric G-protein complex);GO:0007165(signal transduction)
sly-MIR9479-p3_2ss22GA24TG	XM_016590238.1	XM_016590238.1	WDR44	-	3459-3481	1.2	GO:0004871(signal transducer activity);GO:0005737(cytoplasm);GO:0005834(heterotrimeric G-protein complex);GO:0007165(signal transduction)
sly-MIR9479-p3_2ss22GA24TG	XM_016590951.1	XM_016590951.1	dnaJ	translocation protein	807-829	2.2	GO:0005737(cytoplasm);GO:0006457(protein folding)	ko03060(Protein export);ko04141(Protein processing in endoplasmic reticulum)
sly-MIR9479-p3_2ss22GA24TG	XM_016590952.1	XM_016590952.1	dnaJ	translocation protein	807-829	2.2	GO:0005737(cytoplasm);GO:0006457(protein folding)	ko03060(Protein export);ko04141(Protein processing in endoplasmic reticulum)
sly-MIR9479-p3_2ss22GA24TG	XM_016590948.1	XM_016590948.1	dnaJ	translocation protein	807-829	2.2	GO:0005737(cytoplasm);GO:0006457(protein folding)	ko03060(Protein export);ko04141(Protein processing in endoplasmic reticulum)
sly-MIR9479-p3_2ss22GA24TG	XM_016622449.1	XM_016622449.1	-	-	1247-1270	2.5	-
sly-MIR9479-p3_2ss22GA24TG	XM_016622447.1	XM_016622447.1	-	-	1283-1306	2.5	-
sly-MIR9479-p3_2ss22GA24TG	XM_016622448.1	XM_016622448.1	-	-	1311-1334	2.5	-
sly-MIR9479-p5_2ss22GA24TG	XM_016660421.1	XM_016660421.1	GTE8	transcription initiation factor TFIID subunit 1-like	2559-2582	2.5	GO:0003677(DNA binding);GO:0005634(nucleus);GO:0006351(transcription, DNA-templated);GO:0006355(regulation of transcription, DNA-templated);GO:0009507(chloroplast)	ko03022(Basal transcription factors)
sly-MIR9479-p5_2ss22GA24TG	XM_016623704.1	XM_016623704.1	AGD3	ADP-ribosylation factor GTPase-activating protein AGD3-like	96-119	2.5	GO:0005096(GTPase activator activity);GO:0005515(protein binding);GO:0005794(Golgi apparatus);GO:0005829(cytosol);GO:0005886(plasma membrane);GO:0006897(endocytosis);GO:0009733(response to auxin);GO:0009965(leaf morphogenesis);GO:0010051(xylem and phloem pattern formation);GO:0010087(phloem or xylem histogenesis);GO:0030140(trans-Golgi network transport vesicle);GO:0035091(phosphatidylinositol bi…	ko04144(Endocytosis)
sly-MIR9479-p5_2ss22GA24TG	XM_016623811.1	XM_016623811.1	-	-	564-587	0.8	GO:0005739(mitochondrion);GO:0010073(meristem maintenance);GO:1901703(protein localization involved in auxin polar transport)
sly-MIR9479-p5_2ss22GA24TG	XM_016594137.1	XM_016594137.1	MEE12	-	302-325	1.5	GO:0001164(RNA polymerase I CORE element sequence-specific DNA binding);GO:0001187(transcription factor activity, RNA polymerase I CORE element binding transcription factor recruiting);GO:0005668(RNA polymerase transcription factor SL1 complex);GO:0070860(RNA polymerase I core factor complex)
sly-MIR9479-p5_2ss22GA24TG	XM_016578928.1	XM_016578928.1	DEGP9	-	2159-2181	2.2	GO:0004252(serine-type endopeptidase activity);GO:0005730(nucleolus);GO:0005739(mitochondrion);GO:0006508(proteolysis);GO:0008236(serine-type peptidase activity);GO:0009507(chloroplast)
sly-MIR9479-p5_2ss22GA24TG	XM_016579376.1	XM_016579376.1	-	-	668-690	2.5	GO:0003674(molecular_function);GO:0005575(cellular_component);GO:0008150(biological_process)
sly-MIR9479-p5_2ss22GA24TG	XM_016595622.1	XM_016595622.1	APC2	anaphase-promoting complex subunit 2	3350-3373	2.5	GO:0005680(anaphase-promoting complex);GO:0031625(ubiquitin protein ligase binding);GO:0042787(protein ubiquitination involved in ubiquitin-dependent protein catabolic process);GO:0061630(ubiquitin protein ligase activity)	ko04120(Ubiquitin mediated proteolysis)
sly-MIR9479-p5_2ss22GA24TG	XM_016612458.1	XM_016612458.1	SKOR	-	552-575	1.5	GO:0005249(voltage-gated potassium channel activity);GO:0005887(integral component of plasma membrane);GO:0042391(regulation of membrane potential)
sly-MIR9479-p5_2ss22GA24TG	XM_016614000.1	XM_016614000.1	SPBC119.09c	-	607-629	1.8	GO:0003674(molecular_function);GO:0005739(mitochondrion);GO:0005783(endoplasmic reticulum);GO:0005789(endoplasmic reticulum membrane);GO:0006457(protein folding);GO:0016021(integral component of membrane)
sly-MIR9479-p5_2ss22GA24TG	XM_016613999.1	XM_016613999.1	SPBC119.09c	-	607-629	1.8	GO:0003674(molecular_function);GO:0005739(mitochondrion);GO:0005783(endoplasmic reticulum);GO:0005789(endoplasmic reticulum membrane);GO:0006457(protein folding);GO:0016021(integral component of membrane)
sly-MIR9479-p5_2ss22GA24TG	XM_016622275.1	XM_016622275.1	WDR44	transducin family protein / WD-40 repeat family protein	3487-3509	1.2	GO:0004871(signal transducer activity);GO:0005737(cytoplasm);GO:0005834(heterotrimeric G-protein complex);GO:0007165(signal transduction)	ko03008(Ribosome biogenesis in eukaryotes)
sly-MIR9479-p5_2ss22GA24TG	XM_016627936.1	XM_016627936.1	APC2	anaphase-promoting complex subunit 2	4270-4293	2	GO:0005680(anaphase-promoting complex);GO:0031625(ubiquitin protein ligase binding);GO:0042787(protein ubiquitination involved in ubiquitin-dependent protein catabolic process);GO:0061630(ubiquitin protein ligase activity)	ko04120(Ubiquitin mediated proteolysis)
sly-MIR9479-p5_2ss22GA24TG	XM_016638744.1	XM_016638744.1	THE1	serine/threonine-protein kinase NAK	283-305	2	GO:0004672(protein kinase activity);GO:0004674(protein serine/threonine kinase activity);GO:0005524(ATP binding);GO:0005576(extracellular region);GO:0005886(plasma membrane);GO:0009506(plasmodesma);GO:0009741(response to brassinosteroid);GO:0009742(brassinosteroid mediated signaling pathway);GO:0009791(post-embryonic development);GO:0009826(unidimensional cell growth);GO:0016021(integral componen…	ko04626(Plant-pathogen interaction)
sly-MIR9479-p5_2ss22GA24TG	XM_016601969.1	XM_016601969.1	GIP	ADP-ribosylation factor GTPase-activating protein AGD12-like	716-739	2.2	GO:0004596(peptide alpha-N-acetyltransferase activity);GO:0005737(cytoplasm);GO:0017196(N-terminal peptidyl-methionine acetylation)	ko04144(Endocytosis)
sly-MIR9479-p5_2ss22GA24TG	XM_016619981.1	XM_016619981.1	CCX4	-	3533-3555	2	GO:0006812(cation transport);GO:0006813(potassium ion transport);GO:0006814(sodium ion transport);GO:0015297(antiporter activity);GO:0015491(cation:cation antiporter activity);GO:0016021(integral component of membrane);GO:0055085(transmembrane transport)
sly-MIR9479-p5_2ss22GA24TG	XM_016619980.1	XM_016619980.1	CCX4	-	7595-7617	2	GO:0006812(cation transport);GO:0006813(potassium ion transport);GO:0006814(sodium ion transport);GO:0015297(antiporter activity);GO:0015491(cation:cation antiporter activity);GO:0016021(integral component of membrane);GO:0055085(transmembrane transport)
sly-MIR9479-p5_2ss22GA24TG	XM_016589777.1	XM_016589777.1	GBF1	-	4-27	1.5	GO:0003677(DNA binding);GO:0003700(transcription factor activity, sequence-specific DNA binding);GO:0005634(nucleus);GO:0005737(cytoplasm);GO:0006351(transcription, DNA-templated);GO:0006355(regulation of transcription, DNA-templated);GO:0010310(regulation of hydrogen peroxide metabolic process);GO:0010629(negative regulation of gene expression);GO:0043565(sequence-specific DNA binding);GO:004421…
sly-MIR9479-p5_2ss22GA24TG	XM_016590239.1	XM_016590239.1	WDR44	-	3263-3285	1.2	GO:0004871(signal transducer activity);GO:0005737(cytoplasm);GO:0005834(heterotrimeric G-protein complex);GO:0007165(signal transduction)
sly-MIR9479-p5_2ss22GA24TG	XM_016590238.1	XM_016590238.1	WDR44	-	3459-3481	1.2	GO:0004871(signal transducer activity);GO:0005737(cytoplasm);GO:0005834(heterotrimeric G-protein complex);GO:0007165(signal transduction)
sly-MIR9479-p5_2ss22GA24TG	XM_016590951.1	XM_016590951.1	dnaJ	translocation protein	807-829	2.2	GO:0005737(cytoplasm);GO:0006457(protein folding)	ko03060(Protein export);ko04141(Protein processing in endoplasmic reticulum)
sly-MIR9479-p5_2ss22GA24TG	XM_016590952.1	XM_016590952.1	dnaJ	translocation protein	807-829	2.2	GO:0005737(cytoplasm);GO:0006457(protein folding)	ko03060(Protein export);ko04141(Protein processing in endoplasmic reticulum)
sly-MIR9479-p5_2ss22GA24TG	XM_016590948.1	XM_016590948.1	dnaJ	translocation protein	807-829	2.2	GO:0005737(cytoplasm);GO:0006457(protein folding)	ko03060(Protein export);ko04141(Protein processing in endoplasmic reticulum)
sly-MIR9479-p5_2ss22GA24TG	XM_016622449.1	XM_016622449.1	-	-	1247-1270	2.5	-
sly-MIR9479-p5_2ss22GA24TG	XM_016622447.1	XM_016622447.1	-	-	1283-1306	2.5	-
sly-MIR9479-p5_2ss22GA24TG	XM_016622448.1	XM_016622448.1	-	-	1311-1334	2.5	-
gra-miR482d_R-2_1ss12CA	XM_016640825.1	XM_016640825.1	OsABCB25	ATP-binding cassette superfamily	474-493	2.2	GO:0016021(integral component of membrane);GO:0042626(ATPase activity, coupled to transmembrane movement of substances);GO:0055085(transmembrane transport)	ko02010(ABC transporters)
gra-miR482d_R-2_1ss12CA	XM_016640831.1	XM_016640831.1	OsABCB25	ABC transporter B family member 1	513-532	2.2	GO:0016021(integral component of membrane);GO:0042626(ATPase activity, coupled to transmembrane movement of substances);GO:0055085(transmembrane transport)	ko02010(ABC transporters)
gra-miR482d_R-2_1ss12CA	XM_016646731.1	XM_016646731.1	DJA6	molecular chaperone DnaJ	761-780	2.5	GO:0005524(ATP binding);GO:0005739(mitochondrion);GO:0006457(protein folding);GO:0009408(response to heat);GO:0009507(chloroplast);GO:0009535(chloroplast thylakoid membrane);GO:0009941(chloroplast envelope);GO:0031072(heat shock protein binding);GO:0046872(metal ion binding);GO:0051082(unfolded protein binding)	ko04141(Protein processing in endoplasmic reticulum)
gra-miR482d_R-2_1ss12CA	XM_016646732.1	XM_016646732.1	DJA6	molecular chaperone DnaJ	785-804	2.5	GO:0005524(ATP binding);GO:0005739(mitochondrion);GO:0006457(protein folding);GO:0009408(response to heat);GO:0009507(chloroplast);GO:0009535(chloroplast thylakoid membrane);GO:0009941(chloroplast envelope);GO:0031072(heat shock protein binding);GO:0046872(metal ion binding);GO:0051082(unfolded protein binding)	ko04141(Protein processing in endoplasmic reticulum)
gra-miR482d_R-2_1ss12CA	XM_016625033.1	XM_016625033.1	R1A-10	putative late blight resistance protein homolog R1B-16	695-714	2.2	GO:0005524(ATP binding);GO:0005634(nucleus);GO:0006952(defense response);GO:0043531(ADP binding)	ko04626(Plant-pathogen interaction)
gra-miR482d_R-2_1ss12CA	XM_016647154.1	XM_016647154.1	-	HSPA4 nucleotide-binding domain protein	760-779	2	GO:0005515(protein binding)	ko03040(Spliceosome);ko04141(Protein processing in endoplasmic reticulum);ko04144(Endocytosis)
gra-miR482d_R-2_1ss12CA	XM_016647153.1	XM_016647153.1	-	HSPA4 nucleotide-binding domain protein	793-812	2	GO:0005515(protein binding)	ko03040(Spliceosome);ko04141(Protein processing in endoplasmic reticulum);ko04144(Endocytosis)
gra-miR482d_R-2_1ss12CA	XM_016578612.1	XM_016578612.1	R1A-10	putative late blight resistance protein homolog R1A-10	3-22	2.5	GO:0005524(ATP binding);GO:0006952(defense response);GO:0009506(plasmodesma);GO:0043531(ADP binding)	ko04626(Plant-pathogen interaction)
gra-miR482d_R-2_1ss12CA	XM_016578608.1	XM_016578608.1	R1B-16	putative late blight resistance protein homolog R1A-10	263-282	2.5	GO:0005524(ATP binding);GO:0006952(defense response);GO:0043531(ADP binding)	ko04626(Plant-pathogen interaction)
gra-miR482d_R-2_1ss12CA	XM_016578606.1	XM_016578606.1	R1A-10	putative late blight resistance protein homolog R1A-10	263-282	2.5	GO:0005524(ATP binding);GO:0006952(defense response);GO:0043531(ADP binding)	ko04626(Plant-pathogen interaction)
gra-miR482d_R-2_1ss12CA	XM_016578605.1	XM_016578605.1	R1A-10	putative late blight resistance protein homolog R1A-10	263-282	2.5	GO:0005524(ATP binding);GO:0006952(defense response);GO:0043531(ADP binding)	ko04626(Plant-pathogen interaction)
gra-miR482d_R-2_1ss12CA	XM_016595448.1	XM_016595448.1	R1B-23	putative late blight resistance protein homolog R1B-14	761-780	1.2	GO:0005524(ATP binding);GO:0006952(defense response);GO:0009506(plasmodesma);GO:0043531(ADP binding)	ko04626(Plant-pathogen interaction)
gra-miR482d_R-2_1ss12CA	XM_016596109.1	XM_016596109.1	-	animal HSPA9 nucleotide-binding domain protein	165-184	2	GO:0005515(protein binding)	ko03040(Spliceosome);ko04141(Protein processing in endoplasmic reticulum);ko04144(Endocytosis)
gra-miR482d_R-2_1ss12CA	XM_016648996.1	XM_016648996.1	BGAL3	beta-galactosidase	2280-2300	2.5	GO:0004565(beta-galactosidase activity);GO:0005618(cell wall);GO:0005773(vacuole)	ko00052(Galactose metabolism);ko00600(Sphingolipid metabolism);ko00531(Glycosaminoglycan degradation);ko00604(Glycosphingolipid biosynthesis - ganglio series);ko00511(Other glycan degradation)
gra-miR482d_R-2_1ss12CA	XM_016596472.1	XM_016596472.1	HIS2A	hypothetical protein	88-107	2.5	GO:0000790(nuclear chromatin);GO:0003677(DNA binding);GO:0006342(chromatin silencing)	ko04070(Phosphatidylinositol signaling system);ko04626(Plant-pathogen interaction)
gra-miR482d_R-2_1ss12CA	XM_016611811.1	XM_016611811.1	-	HSPA4 nucleotide-binding domain protein	912-931	1.2	GO:0005515(protein binding)	ko03040(Spliceosome);ko04141(Protein processing in endoplasmic reticulum);ko04144(Endocytosis)
gra-miR482d_R-2_1ss12CA	XM_016649594.1	XM_016649594.1	-	HSPA4 nucleotide-binding domain protein	771-790	2	GO:0005737(cytoplasm);GO:0006952(defense response);GO:0007165(signal transduction);GO:0016021(integral component of membrane);GO:0043531(ADP binding)	ko03040(Spliceosome);ko04141(Protein processing in endoplasmic reticulum);ko04144(Endocytosis)
gra-miR482d_R-2_1ss12CA	XM_016649691.1	XM_016649691.1	R1A-10	putative late blight resistance protein homolog R1B-14	562-581	2.5	GO:0005524(ATP binding);GO:0006952(defense response);GO:0043531(ADP binding)	ko04626(Plant-pathogen interaction)
gra-miR482d_R-2_1ss12CA	XM_016612608.1	XM_016612608.1	RPP13L3	disease resistance protein RPP13	756-775	2	GO:0005524(ATP binding);GO:0006952(defense response);GO:0043531(ADP binding)	ko04626(Plant-pathogen interaction)
gra-miR482d_R-2_1ss12CA	XM_016607808.1	XM_016607808.1	-	HSPA4 nucleotide-binding domain protein	616-635	2	GO:0005737(cytoplasm);GO:0006952(defense response);GO:0007165(signal transduction);GO:0016021(integral component of membrane);GO:0043531(ADP binding)	ko03040(Spliceosome);ko04141(Protein processing in endoplasmic reticulum);ko04144(Endocytosis)
gra-miR482d_R-2_1ss12CA	XM_016598272.1	XM_016598272.1	R1A-10	putative late blight resistance protein homolog R1B-14	2045-2064	2.5	GO:0000166(nucleotide binding);GO:0002230(positive regulation of defense response to virus by host);GO:0002239(response to oomycetes);GO:0005515(protein binding);GO:0005524(ATP binding);GO:0005886(plasma membrane);GO:0006952(defense response);GO:0009416(response to light stimulus);GO:0009611(response to wounding);GO:0009626(plant-type hypersensitive response);GO:0009637(response to blue light);GO…	ko04626(Plant-pathogen interaction)
gra-miR482d_R-2_1ss12CA	XM_016598271.1	XM_016598271.1	R1A-10	putative late blight resistance protein homolog R1B-16	2099-2118	2.5	GO:0000166(nucleotide binding);GO:0002230(positive regulation of defense response to virus by host);GO:0002239(response to oomycetes);GO:0005515(protein binding);GO:0005524(ATP binding);GO:0005886(plasma membrane);GO:0006952(defense response);GO:0009416(response to light stimulus);GO:0009611(response to wounding);GO:0009626(plant-type hypersensitive response);GO:0009637(response to blue light);GO…	ko04626(Plant-pathogen interaction)
gra-miR482d_R-2_1ss12CA	XM_016598270.1	XM_016598270.1	R1A-10	putative late blight resistance protein homolog R1B-16	3144-3163	2.5	GO:0000166(nucleotide binding);GO:0002230(positive regulation of defense response to virus by host);GO:0002239(response to oomycetes);GO:0005515(protein binding);GO:0005524(ATP binding);GO:0005886(plasma membrane);GO:0006952(defense response);GO:0009416(response to light stimulus);GO:0009611(response to wounding);GO:0009626(plant-type hypersensitive response);GO:0009637(response to blue light);GO…	ko04626(Plant-pathogen interaction)
gra-miR482d_R-2_1ss12CA	XM_016613003.1	XM_016613003.1	At4g11170	animal HSPA9 nucleotide-binding domain protein	427-446	2	GO:0005737(cytoplasm);GO:0006952(defense response);GO:0007165(signal transduction);GO:0009506(plasmodesma);GO:0009507(chloroplast);GO:0016021(integral component of membrane);GO:0043531(ADP binding)	ko03040(Spliceosome);ko04141(Protein processing in endoplasmic reticulum);ko04144(Endocytosis)
gra-miR482d_R-2_1ss12CA	XM_016629302.1	XM_016629302.1	RPP13L3	putative late blight resistance protein homolog R1B-16	4217-4236	1.5	GO:0005524(ATP binding);GO:0006952(defense response);GO:0043531(ADP binding)	ko04626(Plant-pathogen interaction)
gra-miR482d_R-2_1ss12CA	XM_016651671.1	XM_016651671.1	-	HSPA4 nucleotide-binding domain protein	249-268	1.5	GO:0005737(cytoplasm);GO:0006952(defense response);GO:0007165(signal transduction);GO:0016021(integral component of membrane);GO:0043531(ADP binding)	ko03040(Spliceosome);ko04141(Protein processing in endoplasmic reticulum);ko04144(Endocytosis)
gra-miR482d_R-2_1ss12CA	XM_016651672.1	XM_016651672.1	-	HSPA4 nucleotide-binding domain protein	700-719	2	GO:0005737(cytoplasm);GO:0006952(defense response);GO:0007165(signal transduction);GO:0016021(integral component of membrane);GO:0043531(ADP binding)	ko03040(Spliceosome);ko04141(Protein processing in endoplasmic reticulum);ko04144(Endocytosis)
gra-miR482d_R-2_1ss12CA	XM_016614075.1	XM_016614075.1	-	animal HSPA9 nucleotide-binding domain protein	940-959	2.5	GO:0005737(cytoplasm);GO:0006952(defense response);GO:0007165(signal transduction);GO:0016021(integral component of membrane);GO:0043531(ADP binding)	ko03040(Spliceosome);ko04141(Protein processing in endoplasmic reticulum);ko04144(Endocytosis)
gra-miR482d_R-2_1ss12CA	XM_016584602.1	XM_016584602.1	-	HSPA4 nucleotide-binding domain protein	1335-1354	2	GO:0005737(cytoplasm);GO:0006952(defense response);GO:0007165(signal transduction);GO:0016021(integral component of membrane);GO:0043531(ADP binding)	ko03040(Spliceosome);ko04141(Protein processing in endoplasmic reticulum);ko04144(Endocytosis)
gra-miR482d_R-2_1ss12CA	XM_016653265.1	XM_016653265.1	-	HSPA4 nucleotide-binding domain protein	657-676	2	GO:0005737(cytoplasm);GO:0006952(defense response);GO:0007165(signal transduction);GO:0016021(integral component of membrane);GO:0043531(ADP binding)	ko03040(Spliceosome);ko04141(Protein processing in endoplasmic reticulum);ko04144(Endocytosis)
gra-miR482d_R-2_1ss12CA	XM_016653263.1	XM_016653263.1	-	HSPA4 nucleotide-binding domain protein	791-810	2.5	GO:0005737(cytoplasm);GO:0006952(defense response);GO:0007165(signal transduction);GO:0016021(integral component of membrane);GO:0043531(ADP binding)	ko03040(Spliceosome);ko04141(Protein processing in endoplasmic reticulum);ko04144(Endocytosis)
gra-miR482d_R-2_1ss12CA	XM_016653264.1	XM_016653264.1	-	HSPA4 nucleotide-binding domain protein	747-766	2	GO:0005737(cytoplasm);GO:0006952(defense response);GO:0007165(signal transduction);GO:0016021(integral component of membrane);GO:0043531(ADP binding)	ko03040(Spliceosome);ko04141(Protein processing in endoplasmic reticulum);ko04144(Endocytosis)
gra-miR482d_R-2_1ss12CA	XM_016635411.1	XM_016635411.1	R1B-16	putative late blight resistance protein homolog R1B-14	536-555	2.2	GO:0005524(ATP binding);GO:0006952(defense response);GO:0043531(ADP binding)	ko04626(Plant-pathogen interaction)
gra-miR482d_R-2_1ss12CA	XM_016635403.1	XM_016635403.1	R1B-16	putative late blight resistance protein homolog R1B-14	536-555	2.2	GO:0005524(ATP binding);GO:0006952(defense response);GO:0043531(ADP binding)	ko04626(Plant-pathogen interaction)
gra-miR482d_R-2_1ss12CA	XM_016635399.1	XM_016635399.1	R1B-16	putative late blight resistance protein homolog R1B-14	536-555	2.2	GO:0005524(ATP binding);GO:0006952(defense response);GO:0043531(ADP binding)	ko04626(Plant-pathogen interaction)
gra-miR482d_R-2_1ss12CA	XM_016585422.1	XM_016585422.1	R1A-10	putative late blight resistance protein homolog R1B-23	472-491	2.5	GO:0005524(ATP binding);GO:0005886(plasma membrane);GO:0006952(defense response);GO:0043531(ADP binding)	ko04626(Plant-pathogen interaction)
gra-miR482d_R-2_1ss12CA	XM_016638587.1	XM_016638587.1	R1A-10	putative late blight resistance protein homolog R1B-14	644-663	2.2	GO:0005524(ATP binding);GO:0006952(defense response);GO:0043531(ADP binding)	ko04626(Plant-pathogen interaction)
gra-miR482d_R-2_1ss12CA	XM_016654232.1	XM_016654232.1	-	HSPA4 nucleotide-binding domain protein	1056-1075	2	GO:0005737(cytoplasm);GO:0006952(defense response);GO:0007165(signal transduction);GO:0016021(integral component of membrane);GO:0043531(ADP binding)	ko03040(Spliceosome);ko04141(Protein processing in endoplasmic reticulum);ko04144(Endocytosis)
gra-miR482d_R-2_1ss12CA	XM_016654231.1	XM_016654231.1	-	HSPA4 nucleotide-binding domain protein	1056-1075	2	GO:0005737(cytoplasm);GO:0006952(defense response);GO:0007165(signal transduction);GO:0016021(integral component of membrane);GO:0043531(ADP binding)	ko03040(Spliceosome);ko04141(Protein processing in endoplasmic reticulum);ko04144(Endocytosis)
gra-miR482d_R-2_1ss12CA	XM_016654234.1	XM_016654234.1	-	HSPA4 nucleotide-binding domain protein	1057-1076	2	GO:0005737(cytoplasm);GO:0006952(defense response);GO:0007165(signal transduction);GO:0016021(integral component of membrane);GO:0043531(ADP binding)	ko03040(Spliceosome);ko04141(Protein processing in endoplasmic reticulum);ko04144(Endocytosis)
gra-miR482d_R-2_1ss12CA	XM_016654233.1	XM_016654233.1	-	HSPA4 nucleotide-binding domain protein	1057-1076	2	GO:0005737(cytoplasm);GO:0006952(defense response);GO:0007165(signal transduction);GO:0016021(integral component of membrane);GO:0043531(ADP binding)	ko03040(Spliceosome);ko04141(Protein processing in endoplasmic reticulum);ko04144(Endocytosis)
gra-miR482d_R-2_1ss12CA	XM_016654281.1	XM_016654281.1	-	animal HSPA9 nucleotide-binding domain protein	37-56	1.8	GO:0006952(defense response);GO:0007165(signal transduction);GO:0043531(ADP binding)	ko03040(Spliceosome);ko04141(Protein processing in endoplasmic reticulum);ko04144(Endocytosis)
gra-miR482d_R-2_1ss12CA	XM_016639010.1	XM_016639010.1	R1A-10	putative late blight resistance protein homolog R1B-23	979-998	2.5	GO:0005524(ATP binding);GO:0006952(defense response);GO:0009506(plasmodesma);GO:0043531(ADP binding)	ko04626(Plant-pathogen interaction)
gra-miR482d_R-2_1ss12CA	XM_016639170.1	XM_016639170.1	R1A-10	putative late blight resistance protein homolog R1B-14	1407-1426	2.2	GO:0000166(nucleotide binding);GO:0002230(positive regulation of defense response to virus by host);GO:0002239(response to oomycetes);GO:0005515(protein binding);GO:0005524(ATP binding);GO:0005886(plasma membrane);GO:0006952(defense response);GO:0009416(response to light stimulus);GO:0009611(response to wounding);GO:0009626(plant-type hypersensitive response);GO:0009637(response to blue light);GO…	ko04626(Plant-pathogen interaction)
gra-miR482d_R-2_1ss12CA	XM_016639171.1	XM_016639171.1	R1A-10	putative late blight resistance protein homolog R1B-14	1407-1426	2.2	GO:0000166(nucleotide binding);GO:0002230(positive regulation of defense response to virus by host);GO:0002239(response to oomycetes);GO:0005515(protein binding);GO:0005524(ATP binding);GO:0005886(plasma membrane);GO:0006952(defense response);GO:0009416(response to light stimulus);GO:0009611(response to wounding);GO:0009626(plant-type hypersensitive response);GO:0009637(response to blue light);GO…	ko04626(Plant-pathogen interaction)
gra-miR482d_R-2_1ss12CA	XM_016602102.1	XM_016602102.1	-	HSPA4 nucleotide-binding domain protein	1222-1241	2	GO:0005737(cytoplasm);GO:0006952(defense response);GO:0007165(signal transduction);GO:0016021(integral component of membrane);GO:0043531(ADP binding)	ko03040(Spliceosome);ko04141(Protein processing in endoplasmic reticulum);ko04144(Endocytosis)
gra-miR482d_R-2_1ss12CA	XM_016617134.1	XM_016617134.1	-	HSPA4 nucleotide-binding domain protein	772-791	2	GO:0005737(cytoplasm);GO:0006952(defense response);GO:0007165(signal transduction);GO:0016021(integral component of membrane);GO:0043531(ADP binding)	ko03040(Spliceosome);ko04141(Protein processing in endoplasmic reticulum);ko04144(Endocytosis)
gra-miR482d_R-2_1ss12CA	XM_016617135.1	XM_016617135.1	-	HSPA4 nucleotide-binding domain protein	773-792	2	GO:0006952(defense response);GO:0007165(signal transduction);GO:0043531(ADP binding)	ko03040(Spliceosome);ko04141(Protein processing in endoplasmic reticulum);ko04144(Endocytosis)
gra-miR482d_R-2_1ss12CA	XM_016640203.1	XM_016640203.1	-	HSPA4 nucleotide-binding domain protein	775-794	1.5	GO:0005515(protein binding)	ko03040(Spliceosome);ko04141(Protein processing in endoplasmic reticulum);ko04144(Endocytosis)
gra-miR482d_R-2_1ss12CA	XM_016640206.1	XM_016640206.1	-	HSPA4 nucleotide-binding domain protein	775-794	1.5	GO:0005515(protein binding)	ko03040(Spliceosome);ko04141(Protein processing in endoplasmic reticulum);ko04144(Endocytosis)
gra-miR482d_R-2_1ss12CA	XM_016640205.1	XM_016640205.1	-	HSPA4 nucleotide-binding domain protein	775-794	1.5	GO:0005515(protein binding)	ko03040(Spliceosome);ko04141(Protein processing in endoplasmic reticulum);ko04144(Endocytosis)
gra-miR482d_R-2_1ss12CA	XM_016640202.1	XM_016640202.1	-	HSPA4 nucleotide-binding domain protein	775-794	1.5	GO:0005515(protein binding)	ko03040(Spliceosome);ko04141(Protein processing in endoplasmic reticulum);ko04144(Endocytosis)
gra-miR482d_R-2_1ss12CA	XM_016640204.1	XM_016640204.1	-	HSPA4 nucleotide-binding domain protein	775-794	1.5	GO:0005515(protein binding)	ko03040(Spliceosome);ko04141(Protein processing in endoplasmic reticulum);ko04144(Endocytosis)
gra-miR482d_R-2_1ss12CA	XM_016640201.1	XM_016640201.1	-	HSPA4 nucleotide-binding domain protein	775-794	1.5	GO:0005515(protein binding)	ko03040(Spliceosome);ko04141(Protein processing in endoplasmic reticulum);ko04144(Endocytosis)
gra-miR482d_R-2_1ss12CA	XM_016640208.1	XM_016640208.1	-	HSPA4 nucleotide-binding domain protein	775-794	1.5	GO:0005515(protein binding)	ko03040(Spliceosome);ko04141(Protein processing in endoplasmic reticulum);ko04144(Endocytosis)
gra-miR482d_R-2_1ss12CA	XM_016640207.1	XM_016640207.1	-	HSPA4 nucleotide-binding domain protein	775-794	1.5	GO:0005515(protein binding)	ko03040(Spliceosome);ko04141(Protein processing in endoplasmic reticulum);ko04144(Endocytosis)
gra-miR482d_R-2_1ss12CA	XM_016655909.1	XM_016655909.1	DJA6	dnaJ protein homolog 2-like	674-693	2.5	GO:0005524(ATP binding);GO:0005739(mitochondrion);GO:0006457(protein folding);GO:0009408(response to heat);GO:0009507(chloroplast);GO:0009535(chloroplast thylakoid membrane);GO:0009941(chloroplast envelope);GO:0031072(heat shock protein binding);GO:0046872(metal ion binding);GO:0051082(unfolded protein binding)	ko04141(Protein processing in endoplasmic reticulum)
gra-miR482d_R-2_1ss12CA	XM_016640504.1	XM_016640504.1	R1A-4	putative late blight resistance protein homolog R1B-23	1740-1759	2.2	GO:0005524(ATP binding);GO:0005575(cellular_component);GO:0006952(defense response);GO:0043531(ADP binding)	ko04626(Plant-pathogen interaction)
gra-miR482d_R-2_1ss12CA	XM_016587374.1	XM_016587374.1	R1B-23	putative late blight resistance protein homolog R1B-23	857-876	2.2	GO:0005524(ATP binding);GO:0006952(defense response);GO:0009506(plasmodesma);GO:0043531(ADP binding)	ko04626(Plant-pathogen interaction)
gra-miR482d_R-2_1ss12CA	XM_016587375.1	XM_016587375.1	R1B-23	putative late blight resistance protein homolog R1A-10	857-876	2.2	GO:0005524(ATP binding);GO:0006952(defense response);GO:0009506(plasmodesma);GO:0043531(ADP binding)	ko04626(Plant-pathogen interaction)
gra-miR482d_R-2_1ss12CA	XM_016587734.1	XM_016587734.1	-	animal HSPA9 nucleotide-binding domain protein	948-967	2	GO:0005737(cytoplasm);GO:0006952(defense response);GO:0007165(signal transduction);GO:0016021(integral component of membrane);GO:0043531(ADP binding)	ko03040(Spliceosome);ko04141(Protein processing in endoplasmic reticulum);ko04144(Endocytosis)
gra-miR482d_R-2_1ss12CA	XM_016641544.1	XM_016641544.1	-	HSPA4 nucleotide-binding domain protein	3488-3507	2	GO:0005737(cytoplasm);GO:0006952(defense response);GO:0007165(signal transduction);GO:0016021(integral component of membrane);GO:0043531(ADP binding)	ko03040(Spliceosome);ko04141(Protein processing in endoplasmic reticulum);ko04144(Endocytosis)
gra-miR482d_R-2_1ss12CA	XM_016641544.1	XM_016641544.1	-	HSPA4 nucleotide-binding domain protein	832-851	2	GO:0005737(cytoplasm);GO:0006952(defense response);GO:0007165(signal transduction);GO:0016021(integral component of membrane);GO:0043531(ADP binding)	ko03040(Spliceosome);ko04141(Protein processing in endoplasmic reticulum);ko04144(Endocytosis)
gra-miR482d_R-2_1ss12CA	XM_016657637.1	XM_016657637.1	-	-	440-459	2.5	-
gra-miR482d_R-2_1ss12CA	XM_016619867.1	XM_016619867.1	At4g22030	-	632-651	2.5	GO:0009507(chloroplast)
gra-miR482d_R-2_1ss12CA	XM_016620013.1	XM_016620013.1	DJA6	molecular chaperone DnaJ	698-717	2	GO:0005524(ATP binding);GO:0005739(mitochondrion);GO:0006457(protein folding);GO:0009408(response to heat);GO:0009507(chloroplast);GO:0009535(chloroplast thylakoid membrane);GO:0009941(chloroplast envelope);GO:0031072(heat shock protein binding);GO:0046872(metal ion binding);GO:0051082(unfolded protein binding)	ko04141(Protein processing in endoplasmic reticulum)
gra-miR482d_R-2_1ss12CA	XM_016658021.1	XM_016658021.1	R1A-10	putative late blight resistance protein homolog R1B-23	1102-1121	2.5	GO:0005524(ATP binding);GO:0006952(defense response);GO:0009506(plasmodesma);GO:0043531(ADP binding)	ko04626(Plant-pathogen interaction)
gra-miR482d_R-2_1ss12CA	XM_016658019.1	XM_016658019.1	R1A-10	putative late blight resistance protein homolog R1B-23	976-995	2.5	GO:0005524(ATP binding);GO:0006952(defense response);GO:0009506(plasmodesma);GO:0043531(ADP binding)	ko04626(Plant-pathogen interaction)
gra-miR482d_R-2_1ss12CA	XM_016658018.1	XM_016658018.1	R1A-10	putative late blight resistance protein homolog R1B-23	975-994	2.5	GO:0005524(ATP binding);GO:0006952(defense response);GO:0009506(plasmodesma);GO:0043531(ADP binding)	ko04626(Plant-pathogen interaction)
gra-miR482d_R-2_1ss12CA	XM_016658353.1	XM_016658353.1	R1A-10	putative late blight resistance protein homolog R1B-14	915-934	2.5	GO:0005524(ATP binding);GO:0006952(defense response);GO:0043531(ADP binding)	ko04626(Plant-pathogen interaction)
gra-miR482d_R-2_1ss12CA	XM_016636171.1	XM_016636171.1	-	HSPA4 nucleotide-binding domain protein	719-738	2	GO:0005737(cytoplasm);GO:0006952(defense response);GO:0007165(signal transduction);GO:0016021(integral component of membrane);GO:0043531(ADP binding)	ko03040(Spliceosome);ko04141(Protein processing in endoplasmic reticulum);ko04144(Endocytosis)
gra-miR482d_R-2_1ss12CA	XM_016636168.1	XM_016636168.1	-	HSPA4 nucleotide-binding domain protein	780-799	2	GO:0005737(cytoplasm);GO:0006952(defense response);GO:0007165(signal transduction);GO:0016021(integral component of membrane);GO:0043531(ADP binding)	ko03040(Spliceosome);ko04141(Protein processing in endoplasmic reticulum);ko04144(Endocytosis)
gra-miR482d_R-2_1ss12CA	XM_016636169.1	XM_016636169.1	-	HSPA4 nucleotide-binding domain protein	779-798	2	GO:0006952(defense response);GO:0007165(signal transduction);GO:0043531(ADP binding)	ko03040(Spliceosome);ko04141(Protein processing in endoplasmic reticulum);ko04144(Endocytosis)
gra-miR482d_R-2_1ss12CA	XM_016636305.1	XM_016636305.1	-	animal HSPA9 nucleotide-binding domain protein	815-834	2.5	GO:0005737(cytoplasm);GO:0006952(defense response);GO:0007165(signal transduction);GO:0016021(integral component of membrane);GO:0043531(ADP binding)	ko03040(Spliceosome);ko04141(Protein processing in endoplasmic reticulum);ko04144(Endocytosis)
gra-miR482d_R-2_1ss12CA	XM_016636304.1	XM_016636304.1	-	animal HSPA9 nucleotide-binding domain protein	815-834	2.5	GO:0005737(cytoplasm);GO:0006952(defense response);GO:0007165(signal transduction);GO:0016021(integral component of membrane);GO:0043531(ADP binding)	ko03040(Spliceosome);ko04141(Protein processing in endoplasmic reticulum);ko04144(Endocytosis)
[truncated: 11 more rows]

## Sheet: Unique novel miRNAs in Infested
Target genes annotation of unique novel miRNAs in Infested.
[truncated: 471 more rows]

## Sheet: Unique novel miRNAs in Control
Target genes annotation of unique novel miRNAs in Control.
[truncated: 545 more rows]
