# Supplementary material for: Small RNA and Degradome Sequencing Reveal Important MicroRNA Function in Nicotiana tabacum Response to Bemisia tabaci
Source: MDPI journal article supplement (doi:10.3390/genes13020361), 2022-02-17
Supplement: s1 [file Supplementary Data S3. All differential miRNAs_20220216.xlsx]

## Sheet: Sheet1
red is pvalue<0.001,orange is pvalue <0.01,blue is pvalue<0.05,green is pvalue <0.1.
Index	miR_name	miR_seq	up/down	fold_change(Infested(mean)/Control(mean))	log2(fold_change)	pvalue(t_test)	Control(mean)	Infested(mean)	Control/Control_1(norm)	Control/Control_2(norm)	Control/Control_3(norm)	Infested/Infested_1(norm)	Infested/Infested_2(norm)	Infested/Infested_3(norm)	Control/Control_1(raw)	Control/Control_2(raw)	Control/Control_3(raw)	Infested/Infested_1(raw)	Infested/Infested_2(raw)	Infested/Infested_3(raw)	Expression level
1	PC-5p-244240_18	AAACCCGCTCCCGTCACTTTAGTT	up	inf	inf	0.000102408	0	5.88967	0	0	0	5.93525	5.77149	5.96228	0	0	0	6	6	6	low
2	fve-MIR3627b-p5_2ss7AT22AT	TGTCGCTGGAGAGATGGCACTT	up	2.81246	1.49183	0.00358982	41.4488	116.573	44.0128	38.6252	41.7083	124.146	120.239	105.334	41.5	38.5	43.5	125.5	125	106	middle
3	PC-5p-50806_114	TTTTCGATATCGCTGGCCTCC	down	0.482544	-1.05127	0.00616882	29.1126	14.0481	26.5137	31.1008	29.7232	16.8165	15.3906	9.93714	25	31	31	17	16	10	middle
4	PC-5p-181486_27	ACCCATTGTGGAGTTGTTGGGCTA	down	-inf	-inf	0.00725795	7.36068	0	6.36329	8.52764	7.19109	0	0	0	6	8.5	7.5	0	0	0	low
5	PC-3p-258573_16	AATGTCGTGTCCTAAAGTTTGAGC	down	-inf	-inf	0.00816831	5.39121	0	6.36329	5.01626	4.79406	0	0	0	6	5	5	0	0	0	low
6	gma-MIR171g-p3	TTGAGCCGTGCCAATATCATA	up	1.59279	0.671552	0.00896747	18.2721	29.1035	16.9688	21.0683	16.7792	31.6547	29.8194	25.8366	16	21	17.5	32	31	26	middle
7	PC-3p-61258_95	TTTACTTCCCACCGCTTAGCA	up	1.666	0.736391	0.0108585	11.2067	18.6703	10.0752	12.039	11.5058	19.7842	16.3525	19.8743	9.5	12	12	20	17	20	middle
8	PC-5p-135574_40	TCGCCTGATAATGCTCTTAAA	down	-inf	-inf	0.0155792	13.4071	0	14.8477	10.0325	15.341	0	0	0	14	10	16	0	0	0	middle
9	hbr-MIR6173-p5_2ss17AG18GC	TACCCCAGTAGTCCTAGC	down	0.425289	-1.23348	0.0170921	14.6578	6.23381	11.666	15.0488	17.2586	7.91367	4.32862	6.45914	11	15	18	8	4.5	6.5	middle
10	PC-3p-130469_42	AGCACCTGTGTATGAACTTCTAGT	up	6.15138	2.62091	0.01757	1.91763	11.796	0	0	5.75288	14.8381	9.61915	10.9309	0	0	6	15	10	11	middle
11	nta-MIR6151g-p3	AATCCGAGCCCCACATTCATC	up	1.27378	0.34912	0.0192736	175.962	224.137	157.845	189.447	180.592	219.753	212.263	240.396	148.833	188.833	188.35	222.15	220.667	241.917	middle
12	nta-MIR6151h-p3	AATCCGAGCCCCACATTCATC	up	1.27378	0.34912	0.0192736	175.962	224.137	157.845	189.447	180.592	219.753	212.263	240.396	148.833	188.833	188.35	222.15	220.667	241.917	middle
13	nta-MIR6151e-p3	AATCCGAGCCCCACATTCATC	up	1.27378	0.34912	0.0192736	175.962	224.137	157.845	189.447	180.592	219.753	212.263	240.396	148.833	188.833	188.35	222.15	220.667	241.917	middle
14	nta-MIR6151f-p3	AATCCGAGCCCCACATTCATC	up	1.27378	0.34912	0.0192736	175.962	224.137	157.845	189.447	180.592	219.753	212.263	240.396	148.833	188.833	188.35	222.15	220.667	241.917	middle
15	nta-MIR6151i-p3	AATCCGAGCCCCACATTCATC	up	1.27378	0.34912	0.0192736	175.962	224.137	157.845	189.447	180.592	219.753	212.263	240.396	148.833	188.833	188.35	222.15	220.667	241.917	middle
16	nta-MIR6151d-p3	AATCCGAGCCCCACATTCATC	up	1.27378	0.34912	0.0192736	175.962	224.137	157.845	189.447	180.592	219.753	212.263	240.396	148.833	188.833	188.35	222.15	220.667	241.917	middle
17	PC-3p-171618_30	TCTTCCATGATACACATATTA	down	0.42297	-1.24137	0.0194682	17.4181	7.36735	18.0293	15.0488	19.1763	3.95683	7.21436	10.9309	17	15	20	4	7.5	11	middle
18	nta-miR6159	TAGCATAGAATTCTCGCACCTA	up	1.36871	0.452813	0.0203039	1382.33	1892.01	1254.63	1463.74	1428.63	1790.47	2099.86	1785.7	1183	1459	1490	1810	2183	1797	high
19	PC-3p-202629_23	TTTTCTTGAGGCTGTTAGGGATGT	up	inf	inf	0.0206263	0	7.50196	0	0	0	6.92446	9.61915	5.96228	0	0	0	7	10	6	low
20	PC-5p-194313_25	AAAAGATTTTGAACCTCCTTGACC	up	4.21304	2.07486	0.0210766	6.14654	25.8956	0	5.01626	13.4234	32.6439	20.2002	24.8428	0	5	14	33	21	25	middle
21	stu-miR8021_1ss9CA	ATTCAAGGATCAAACTCGAGACCT	down	0.573621	-0.80183	0.0210967	8.84762	5.07518	7.42384	9.53089	9.58813	3.95683	4.80957	6.45914	7	9.5	10	4	5	6.5	low
22	nta-miR6025b	TGCCAACTATTGAGATGACATC	up	1.42108	0.506985	0.0211306	2467.91	3507.09	2269.58	2374.7	2759.46	3115.02	3543.69	3862.57	2140	2367	2878	3149	3684	3887	high
23	nta-MIR6161c-p3_1ss7AG	GCACCTGTGTATGAACTTCCAGCA	up	1.53771	0.620781	0.0220428	680.814	1046.89	560.677	672.847	808.918	905.785	1121.27	1113.62	528.667	670.667	843.667	915.667	1165.67	1120.67	middle
24	bra-miR168a-5p_L+1	CTCGCTTGGTGCAGGTCGGGAA	up	3.78982	1.92213	0.0232363	2.41732	9.1612	4.2422	3.00975	0	8.40827	9.13819	9.93714	4	3	0	8.5	9.5	10	low
25	mtr-MIR2603-p5_2ss9AC17AC	GTCCCTGCCCTTTGTACA	down	0.419541	-1.25312	0.0239557	9.78442	4.10496	12.1963	8.52764	8.62931	5.93525	2.40479	3.97486	11.5	8.5	9	6	2.5	4	middle
26	mtr-MIR2603-p3_2ss9AC17AC	GTCCCTGCCCTTTGTACA	down	0.419541	-1.25312	0.0239557	9.78442	4.10496	12.1963	8.52764	8.62931	5.93525	2.40479	3.97486	11.5	8.5	9	6	2.5	4	middle
27	hbr-MIR6173-p3_2ss18GA19CG	CGTAAACGATGGATACTAG	down	-inf	-inf	0.0240834	6.66962	0	6.36329	5.01626	8.62931	0	0	0	6	5	9	0	0	0	low
28	ath-miR8175_L+4	GTTCGATCCCCGGCAACGGCGCCA	up	1.91682	0.938714	0.0310834	4.86619	9.32761	4.2422	6.52114	3.83525	11.3759	8.65723	7.94971	4	6.5	4	11.5	9	8	middle
29	PC-3p-113881_50	AATTAATGTCAGTTGGGTGAGGCA	down	0.300599	-1.73409	0.0322705	16.2118	4.87326	21.211	13.0423	14.3822	6.92446	7.69532	0	20	13	15	7	8	0	middle
30	PC-5p-67924_86	AGGGCTGCTATTTAGAGATTAGTC	up	1.43109	0.517111	0.0333933	5.83456	8.34975	4.77247	6.01951	6.71169	7.91367	7.69532	9.44028	4.5	6	7	8	8	9.5	low
31	osa-MIR5825-p5_2ss15TC20AC	TTATTATTGTTTTCCACAACC	down	0.672016	-0.573433	0.0352791	8.5132	5.72101	7.42384	8.52764	9.58813	4.45144	6.25245	6.45914	7	8.5	10	4.5	6.5	6.5	low
32	PC-3p-127236_43	ATGCCTCATACAACTAGTGTAAGT	up	6.03038	2.59225	0.0361499	2.0065	12.1	0	6.01951	0	11.8705	12.5049	11.9246	0	6	0	12	13	12	middle
33	csi-miR160c-5p_R+1	TGCCTGGCTCCCTGTATGCTTT	up	1.74507	0.803288	0.0375463	9.36406	16.341	7.42384	12.039	8.62931	12.8597	18.2764	17.8868	7	12	9	13	19	18	middle
34	PC-5p-10208_389	TGTATTCTTTCCGCTCAATTC	down	0.825672	-0.276359	0.0379734	75.0834	61.9942	69.466	75.2439	80.5403	56.8795	62.5245	66.5788	65.5	75	84	57.5	65	67	middle
35	gma-MIR4995-p3	CATAGGCAGTGGCTTGGTT	down	0.486639	-1.03908	0.0382828	10.8068	5.259	13.2569	10.5341	8.62931	5.93525	2.88574	6.956	12.5	10.5	9	6	3	7	middle
36	gma-MIR9724-p5	ACAATCCTCACCTCAAAAGCTAGC	up	4.92741	2.30083	0.0386398	0.799011	3.93705	0	0	2.39703	3.95683	2.88574	4.96857	0	0	2.5	4	3	5	low
37	PC-3p-258597_16	GTATCCTGCATCTTCTCTTTC	up	inf	inf	0.0404165	0	3.42125	0	0	0	2.47302	4.80957	2.98114	0	0	0	2.5	5	3	low
38	PC-3p-114443_49	ATTTCTGGAGAATCCGACACGAGT	up	3.36915	1.75239	0.0421413	3.68521	12.416	5.30275	0	5.75288	7.91367	14.4287	14.9057	5	0	6	8	15	15	middle
39	PC-3p-146848_36	AGCGTATTATGTTAGAACTCCAGC	up	4.88991	2.28981	0.0427743	2.0065	9.81162	0	6.01951	0	12.8597	9.61915	6.956	0	6	0	13	10	7	middle
40	stu-miR166b_1ss4GA	TCGAACCAGGCTTCATTCCTC	up	1.51628	0.60054	0.0450303	6.24635	9.47124	7.42384	6.52114	4.79406	8.40827	11.062	8.94342	7	6.5	5	8.5	11.5	9	middle
41	stu-miR391-5p_L-1R+2	ACGCAGGAGAGATGATGCTGGA	down	0.671565	-0.574402	0.0455627	371.352	249.387	432.704	338.096	343.255	243.345	270.298	234.516	408	337	358	246	281	236	middle
42	PC-5p-216933_21	TAGTTTCGCCCCTAGAGCATA	up	inf	inf	0.04644	0	6.88798	0	0	0	9.89208	4.80957	5.96228	0	0	0	10	5	6	low
43	csi-miR160c-5p_R+1_1ss19CT	TGCCTGGCTCCCTGTATGTTTT	up	2.17375	1.12018	0.0466185	10.5789	22.9959	6.36329	10.0325	15.341	21.7626	29.3384	17.8868	6	10	16	22	30.5	18	middle
44	ath-miR396b-5p_R+1	TTCCACAGCTTTCTTGAACTTT	down	0.863808	-0.211217	0.0476533	156.809	135.453	146.886	161.022	162.519	146.403	132.263	127.692	138.5	160.5	169.5	148	137.5	128.5	middle
45	sly-miR396b_R+1	TTCCACAGCTTTCTTGAACTTT	down	0.863808	-0.211217	0.0476533	156.809	135.453	146.886	161.022	162.519	146.403	132.263	127.692	138.5	160.5	169.5	148	137.5	128.5	middle
46	PC-5p-298501_13	TGGCCCGTCAACATCATGTTC	up	4.61214	2.20544	0.0490126	1.76758	8.15234	5.30275	0	0	7.91367	10.5811	5.96228	5	0	0	8	11	6	middle
47	nta-MIR6155-p3_2ss10CT21CT	ATTCGAGAGTAAGGCTACCTTATG	up	1.40229	0.487788	0.049537	103.272	144.817	84.8439	100.325	124.646	134.532	155.83	144.089	80	100	130	136	162	145	middle
Following miRNAs do not show significant difference (p-value<=0.05).
48	PC-5p-46600_124	TTGGAAAGAATGGGAGCCGTAGGAT	up	1.57392	0.654359	0.0512775	15.2801	24.0495	11.1358	15.0488	19.6557	27.6978	23.086	21.3648	10.5	15	20.5	28	24	21.5	middle
49	PC-3p-159804_33	TAAAAAGGAGTCTCGTACAAT	down	0.219358	-2.18864	0.055685	9.01911	1.97842	8.48439	8.02601	10.5469	5.93525	0	0	8	8	11	6	0	0	middle
50	stu-MIR8021-p3_2ss16GA21CT	AAGGCTCAAACTCGAAACCTTTGG	down	0.666943	-0.584364	0.0559523	8.33644	5.55994	6.89357	8.52764	9.58813	4.94604	5.77149	5.96228	6.5	8.5	10	5	6	6	low
51	stu-MIR8021-p5_2ss16GA21CT	AAGGCTCAAACTCGAAACCTTTGG	down	0.666943	-0.584364	0.0559523	8.33644	5.55994	6.89357	8.52764	9.58813	4.94604	5.77149	5.96228	6.5	8.5	10	5	6	6	low
52	PC-3p-135535_40	CAAAGTCCTTGAACGCATTGCACT	up	1.69162	0.758404	0.0563075	4.84612	8.19778	4.77247	4.01301	5.75288	9.39748	6.25245	8.94342	4.5	4	6	9.5	6.5	9	low
53	PC-3p-103880_55	ATTTTTAGCGCGATAGGTAGATGG	up	2.81766	1.4945	0.057052	4.74576	13.3719	8.48439	0	5.75288	11.8705	17.3145	10.9309	8	0	6	12	18	11	middle
54	PC-5p-190416_26	AATATACTGGACATTGATGCACCT	up	inf	inf	0.0580095	0	8.14699	0	0	0	4.45144	11.543	8.44657	0	0	0	4.5	12	8.5	middle
55	ath-MIR5645e-p5_2ss15TG18GT	TTATTGCATCTCGTGTTTTCT	down	0.230391	-2.11784	0.0584432	4.17514	0.961915	4.2422	3.00975	5.27347	0	2.88574	0	4	3	5.5	0	3	0	low
56	sly-miR403-5p_2ss1CT18AG	TGTTTGTGCGTGAATCTGACA	down	0.472153	-1.08267	0.0597264	5.54672	2.6189	5.30275	7.02276	4.31466	2.96762	2.40479	2.48428	5	7	4.5	3	2.5	2.5	low
57	mtr-MIR2592ay-p5_2ss6AG17CG_1	GAGTCGGGTTGTTTGGGA	down	0.296458	-1.7541	0.0605507	17.1093	5.07218	21.7413	18.5602	11.0263	5.93525	4.80957	4.47171	20.5	18.5	11.5	6	5	4.5	middle
58	mtr-MIR2592ay-p5_2ss6AG17CG_2	GAGTCGGGTTGTTTGGGAA	down	0.296458	-1.7541	0.0605507	17.1093	5.07218	21.7413	18.5602	11.0263	5.93525	4.80957	4.47171	20.5	18.5	11.5	6	5	4.5	middle
59	PC-5p-43808_131	GGGGACATATGGGAATTCCAAGAC	up	1.61793	0.694146	0.0611087	18.8487	30.4959	14.3174	22.5732	19.6557	32.6439	23.5669	35.2768	13.5	22.5	20.5	33	24.5	35.5	middle
60	PC-3p-91741_63	AGGATCCGGGGAACGGTCGCAACC	up	2.05214	1.03713	0.061646	9.74953	20.0074	12.7266	5.01626	11.5058	18.795	15.3906	25.8366	12	5	12	19	16	26	middle
61	hbr-MIR6173-p5_2ss21AG22GC	TAGATACCCCAGTAGTCCTAGC	down	0.544439	-0.877157	0.062112	60.546	32.9636	76.8898	48.6577	56.0905	43.5252	23.5669	31.7988	72.5	48.5	58.5	44	24.5	32	middle
62	nta-MIR6151b-p3	AATCCGAGCCCTACATTCATC	up	1.29042	0.367843	0.0621732	30.8277	39.7807	25.4532	34.1106	32.9192	37.5899	42.0036	39.7486	24	34	34.3333	38	43.6667	40	middle
63	nta-MIR6151c-p3	AATCCGAGCCCTACATTCATC	up	1.29042	0.367843	0.0621732	30.8277	39.7807	25.4532	34.1106	32.9192	37.5899	42.0036	39.7486	24	34	34.3333	38	43.6667	40	middle
64	nta-MIR6151a-p3	AATCCGAGCCCTACATTCATC	up	1.29042	0.367843	0.0621732	30.8277	39.7807	25.4532	34.1106	32.9192	37.5899	42.0036	39.7486	24	34	34.3333	38	43.6667	40	middle
65	nta-miR6151f	TGAGTGTGAGGCATTGGATTGA	down	0.818693	-0.288606	0.063146	21.1774	17.3378	23.3321	20.065	20.1351	17.8057	17.3145	16.8931	22	20	21	18	18	17	middle
66	PC-3p-359_4628	CGGGAGTCTTGGCTTGAGGT	up	1.49405	0.579227	0.0640133	426.473	637.171	304.908	495.105	479.406	545.054	628.13	738.329	287.5	493.5	500	551	653	743	middle
67	nta-MIR166h-p5	GGAATGTTGTTTGGCTCGAGG	down	0.718566	-0.476808	0.0653676	1010.69	726.245	852.681	1017.3	1162.08	627.158	739.712	811.864	804	1014	1212	634	769	817	middle
68	stu-miR8016	ATTTTTGAATGGAAGGCCCATGTG	up	1.19848	0.261205	0.0656726	175.181	209.951	159.082	177.576	188.886	188.939	219.317	221.598	150	177	197	191	228	223	middle
69	csi-miR164a-5p_L+1_1ss17CT	CTGGAGAAGCAGGGCATGTGCA	down	0.712683	-0.488667	0.0663212	44.0518	31.395	36.0587	48.1561	47.9406	35.6115	31.7432	26.8303	34	48	50	36	33	27	middle
70	hbr-miR6173_R-2	AGCCGTAAACGATGGATA	down	0.13188	-2.9227	0.0682408	25.0027	3.29736	38.71	18.5602	17.738	9.89208	0	0	36.5	18.5	18.5	10	0	0	middle
71	nta-miR6161c	AATATACTGGAGTTCGGTGCACCT	up	1.232	0.300998	0.0685673	958.616	1181.01	819.451	1011.61	1044.79	1116.82	1200.31	1225.91	772.667	1008.33	1089.67	1129	1247.83	1233.67	middle
72	PC-3p-212676_22	CGGGAGTCTTGGCTTGAGGGTG	up	inf	inf	0.0690879	0	10.4846	0	0	0	5.93525	9.61915	15.8994	0	0	0	6	10	16	middle
73	PC-5p-56825_103	TCCCTCTGAGGACCACAGATT	down	0.455913	-1.13317	0.0696991	29.4197	13.4128	30.7559	21.0683	36.4349	12.8597	13.4668	13.912	29	21	38	13	14	14	middle
74	PC-3p-227053_20	AGGATCTGACACGGGCGTGACAGT	up	inf	inf	0.0710369	0	14.3944	0	0	0	6.92446	15.3906	20.868	0	0	0	7	16	21	middle
75	nta-miR6161d_L+3	ACTTGAACTCCAGCATATTATACT	up	1.58323	0.662869	0.0746217	100.877	159.711	65.754	109.354	127.522	170.144	151.983	157.007	62	109	133	172	158	158	middle
76	PC-3p-219431_21	TTAGACATGTCTTTTGACCCGACC	up	inf	inf	0.0748447	0	6.88648	0	0	0	10.8813	4.80957	4.96857	0	0	0	11	5	5	middle
77	gma-MIR4995-p3_1ss20GC_2	AGTGGCTTGGTTAAGGGAACCCA	down	0.506397	-0.98166	0.0759091	63.0438	31.9252	82.7228	53.674	52.7347	38.0845	28.3765	29.3146	78	53.5	55	38.5	29.5	29.5	middle
78	gma-MIR4995-p3_1ss20GC_1	AGTGGCTTGGTTAAGGGAACC	down	0.506397	-0.98166	0.0759091	63.0438	31.9252	82.7228	53.674	52.7347	38.0845	28.3765	29.3146	78	53.5	55	38.5	29.5	29.5	middle
79	hbr-MIR6173-p5_1ss1AT	TAGCCGTAAACGATGGATA	down	0.220598	-2.18051	0.0762367	8.84471	1.95112	13.2569	7.52439	5.75288	2.96762	2.88574	0	12.5	7.5	6	3	3	0	middle
80	hbr-MIR6173-p3_1ss21AG	TGCGTATCGACCCGTGCAGTG	down	0.453371	-1.14124	0.078764	153.005	69.3678	199.914	156.507	102.593	100.405	33.667	74.0317	188.5	156	107	101.5	35	74.5	middle
81	PC-3p-93091_62	TTTTTATGGCTCTCTTGCATC	up	2.60734	1.38258	0.0788001	2.81837	7.34844	3.18165	0	5.27347	5.93525	8.65723	7.45285	3	0	5.5	6	9	7.5	low
82	nta-MIR6161a-p5_1ss20TC	ATTTTGCTGCAACAGAGACCGGTC	up	1.3008	0.379395	0.0812465	1059.62	1378.35	872.125	1060.44	1246.3	1516.62	1247.76	1370.66	822.333	1057	1299.83	1533.17	1297.17	1379.33	middle
83	nta-MIR6161b-p5_1ss20TC	ATTTTGCTGCAACAGAGACCGGTC	up	1.3008	0.379395	0.0812465	1059.62	1378.35	872.125	1060.44	1246.3	1516.62	1247.76	1370.66	822.333	1057	1299.83	1533.17	1297.17	1379.33	middle
84	PC-3p-259386_16	TAGGCACACCCCTTAAGAAGTAAT	down	0.225013	-2.15192	0.0812867	3.56244	0.801596	5.30275	2.50813	2.87644	0	2.40479	0	5	2.5	3	0	2.5	0	low
85	aof-MIR166b-p5_2ss6GC17TG	AAGAACGAAAGTTGGGGG	down	0.35844	-1.48019	0.0827981	19.1573	6.86674	26.5137	17.0553	13.9028	6.42985	7.21436	6.956	25	17	14.5	6.5	7.5	7	middle
86	aof-MIR166b-p3_2ss6GC17TG	AAGAACGAAAGTTGGGGG	down	0.35844	-1.48019	0.0827981	19.1573	6.86674	26.5137	17.0553	13.9028	6.42985	7.21436	6.956	25	17	14.5	6.5	7.5	7	middle
87	nta-miR6020b	AAATGTTCTTCGAGTATCTTC	down	0.855744	-0.224748	0.0830025	6489.26	5553.15	7096.13	6236.21	6135.44	5023.2	5865.76	5770.5	6691	6216	6399	5078	6098	5807	high
88	PC-5p-2969_773	ACAAGTACGAGCTCAAGCCTTCGC	up	1.41733	0.503179	0.0834874	109.757	155.562	85.9045	104.338	139.028	166.187	168.335	132.164	81	104	145	168	175	133	middle
89	PC-5p-129448_43	ATTCAAAATTGTAAAGGGGCATGA	up	2.56924	1.36134	0.0835677	3.93894	10.1201	0	7.02276	4.79406	6.92446	12.5049	10.9309	0	7	5	7	13	11	middle
90	ath-miR8175_L-2	TCCCCGGCAACGGCGCCA	up	1.161	0.215369	0.087679	215.207	249.856	194.08	236.767	214.774	257.194	255.869	236.504	183	236	224	260	266	238	middle
91	gma-MIR4995-p3_2ss13GC18TC_2	TGGTTAAGGGAACCCACCGGAGC	down	0.550797	-0.860406	0.0882846	278.56	153.43	358.466	264.357	212.856	223.066	113.506	123.717	338	263.5	222	225.5	118	124.5	middle
92	gma-MIR4995-p5_2ss13GC18TC	TGGTTAAGGGAACCCACCGGAGC	down	0.550797	-0.860406	0.0882846	278.56	153.43	358.466	264.357	212.856	223.066	113.506	123.717	338	263.5	222	225.5	118	124.5	middle
93	PC-5p-202159_23	TTACCCCTCCCGCCAATGGCA	up	2.63439	1.39747	0.0883975	1.6828	4.43315	2.65137	0	2.39703	4.45144	2.88574	5.96228	2.5	0	2.5	4.5	3	6	low
94	osa-MIR2118e-p3_2ss12TA18CT	AAAAGAGAGTCAAAGAGT	down	0.208254	-2.26359	0.0886699	11.751	2.44719	18.0293	10.0325	7.19109	0	3.3667	3.97486	17	10	7.5	0	3.5	4	middle
95	ptc-miR159a_R+1	TTTGGATTGAAGGGAGCTCTAA	down	0.857115	-0.22244	0.0908232	355.747	304.916	386.57	333.581	347.09	327.428	314.546	272.774	364.5	332.5	362	331	327	274.5	middle
96	PC-3p-66017_89	TCCGACATTATTTTTGACCCGATT	up	1.47734	0.563001	0.093583	19.448	28.7313	20.1504	18.0585	20.1351	23.741	34.6289	27.824	19	18	21	24	36	28	middle
97	ata-miR5181-3p_L-1R+4_1ss9TG	ACTTATTGTGGACCGGAGGGAGTA	up	1.43441	0.520456	0.0954744	16.6328	23.8582	15.9082	20.5667	13.4234	27.2032	25.4907	18.8806	15	20.5	14	27.5	26.5	19	middle
98	ptc-miR319e_R+1	TTGGACTGAAGGGAGCTCCTC	down	0.414488	-1.2706	0.0963755	3.98669	1.65244	2.65137	4.51463	4.79406	2.47302	0	2.48428	2.5	4.5	5	2.5	0	2.5	low
99	PC-3p-102295_56	TGACTCAGATGGGGCATACAAACA	down	0.270628	-1.88562	0.0965844	7.32988	1.98367	4.2422	11.0358	6.71169	2.47302	0	3.478	4	11	7	2.5	0	3.5	middle
100	PC-5p-170753_30	TTGAGCAAGTGGCAGTGCATC	up	3.6987	1.88702	0.0975257	2.1211	7.8453	6.36329	0	0	5.93525	8.65723	8.94342	6	0	0	6	9	9	low
101	gma-MIR5764b-p5_2ss3AG21TC	TTGAGCTTTCCTTGGCCTTTC	up	2.52888	1.3385	0.0979254	2.13668	5.40342	0	4.01301	2.39703	5.93525	4.80957	5.46543	0	4	2.5	6	5	5.5	low
102	gma-MIR5764b-p3_2ss3AG21TC	TTGAGCTTTCCTTGGCCTTTC	up	2.52888	1.3385	0.0979254	2.13668	5.40342	0	4.01301	2.39703	5.93525	4.80957	5.46543	0	4	2.5	6	5	5.5	low
103	PC-3p-95076_61	TCGATCCATGCCTTCCATTTGTCC	up	2.38397	1.25336	0.0980204	2.9505	7.0339	0	5.01626	3.83525	8.90287	6.7334	5.46543	0	5	4	9	7	5.5	low
104	mdm-MIR397a-p3_1ss15CG	TTAGGCATCGGAAAGTTTCGTC	down	0.758864	-0.398087	0.0995964	97.7798	74.2016	101.813	81.2634	110.263	72.2122	79.8389	70.5537	96	81	115	73	83	71	middle
105	PC-3p-205194_23	TACAGGTATGGTGACATTTTT	down	0.273104	-1.87248	0.10103	3.03216	0.828095	3.71192	2.50813	2.87644	0	0	2.48428	3.5	2.5	3	0	0	2.5	low
106	sly-miR166c-5p_2ss3GA10TG	GGAATGTTGGCTGGCTCGACA	down	0.643308	-0.636417	0.101126	315.006	202.646	235.442	369.197	340.378	223.561	246.25	138.126	222	368	355	226	256	139	middle
107	nta-miR167a_L+1R-1	TTGAAGCTGCCAGCATGATCTG	down	0.820395	-0.28561	0.101198	1802.22	1478.53	1916.41	1806.1	1684.15	1260.25	1489.77	1685.59	1807	1800.25	1756.5	1274	1548.75	1696.25	high
108	PC-3p-127177_43	AAACCGTCCACGAGATCATCCTCC	down	0.414178	-1.27168	0.101552	13.3583	5.53273	13.7871	9.02926	17.2586	8.90287	7.69532	0	13	9	18	9	8	0	middle
109	PC-3p-152282_35	ATTGACGGGCTGGGCTGGGCTAGC	down	0.360392	-1.47236	0.101637	12.6829	4.57082	8.48439	18.0585	11.5058	8.90287	4.80957	0	8	18	12	9	5	0	middle
110	PC-3p-5517_552	CCAACCTCTGATTTGGAGCTTA	down	0.800243	-0.32149	0.103305	103.671	82.9618	114.539	106.345	90.1284	74.1906	96.1915	78.5034	108	106	94	75	100	79	middle
111	gma-miR396a-5p_L+4	GATCTTCCACAGCTTTCTTGAACTG	up	1.35715	0.44058	0.103713	65.4092	88.7701	61.5118	54.1756	80.5403	83.0935	78.877	104.34	58	54	84	84	82	105	middle
112	gma-MIR4995-p3_2ss13GC18TC_1	TGGTTAAGGGAACCCACCGGA	down	0.354183	-1.49743	0.105956	21.7428	7.70093	29.1651	24.078	11.9852	9.39748	6.25245	7.45285	27.5	24	12.5	9.5	6.5	7.5	middle
113	mtr-MIR2678-p5_2ss13AT21AC	ATGTTTGGCAAATGCTTCAGC	down	0.725326	-0.463298	0.106522	78.746	57.1165	89.6164	63.2048	83.4167	56.3849	54.3482	60.6165	84.5	63	87	57	56.5	61	middle
114	PC-5p-196729_24	TTTTAATAAAGTCCCATGCCT	up	inf	inf	0.11086	0	7.79381	0	0	0	4.94604	13.4668	4.96857	0	0	0	5	14	5	middle
115	nta-MIR396c-p3	TTCAAGAAAGCTGTGGGAAA	down	0.613511	-0.70484	0.112892	135.624	83.2068	147.416	164.533	94.9225	75.1798	103.887	70.5537	139	164	99	76	108	71	middle
116	PC-5p-233742_19	AGTACTTGACCCGATCCATCCC	up	4.28522	2.09937	0.115218	1.91763	8.21744	0	0	5.75288	6.92446	4.80957	12.9183	0	0	6	7	5	13	middle
117	stu-miR393-3p_1ss20AT	ATCATGCGATCTCTTCGGATT	down	0.594635	-0.749924	0.115751	10.6817	6.35168	7.95412	13.5439	10.5469	4.45144	9.13819	5.46543	7.5	13.5	11	4.5	9.5	5.5	middle
118	csi-miR160c-5p_R+2_1ss19CT	TGCCTGGCTCCCTGTATGTTTTT	up	3.48185	1.79985	0.116059	3.27011	11.386	0	5.01626	4.79406	10.8813	17.3145	5.96228	0	5	5	11	18	6	middle
119	stu-MIR7985-p5_2ss1CA18GA	AGAGCTCGTCGCACCGGACTTGCC	up	2.11765	1.08247	0.116348	11.5841	24.5312	3.18165	20.065	11.5058	23.741	25.0098	24.8428	3	20	12	24	26	25	middle
120	nta-MIR482a-p5	GGGATTGGTGGGTTGGAAAGC	up	7.88596	2.97929	0.116649	12.4999	98.5737	10.0752	13.0423	14.3822	163.219	64.9292	67.5725	9.5	13	15	165	67.5	68	middle
121	nta-MIR482c-p5	GGGATTGGTGGGTTGGAAAGC	up	7.88596	2.97929	0.116649	12.4999	98.5737	10.0752	13.0423	14.3822	163.219	64.9292	67.5725	9.5	13	15	165	67.5	68	middle
122	PC-5p-44084_131	TTTACGTTGATTGATTGCTCT	down	0.487807	-1.03562	0.116931	29.2693	14.2778	28.6348	37.1203	22.0527	6.92446	25.9717	9.93714	27	37	23	7	27	10	middle
123	PC-3p-244558_18	AGAAACCCACCAACTTTGATCGGT	up	3.51691	1.81431	0.117856	1.67209	5.88058	0	5.01626	0	4.94604	6.7334	5.96228	0	5	0	5	7	6	low
124	PC-3p-2656_821	TTGTTTTACCTAGTCCTGACAT	down	0.691957	-0.531245	0.11796	165.829	114.747	135.75	157.51	204.227	85.0719	126.011	133.158	128	157	213	86	131	134	middle
125	PC-5p-61422_95	TCTGAGTGGCATGGCAGATTC	up	1.355	0.43829	0.118443	10.722	14.5283	10.6055	10.5341	11.0263	13.8489	17.3145	12.4214	10	10.5	11.5	14	18	12.5	middle
126	han-miR3630-3p_L-1_1ss2GA	ATGGGAATCTCTCTGATGCTT	down	0.127939	-2.96648	0.118948	6.4726	0.828095	2.65137	10.5341	6.23228	0	0	2.48428	2.5	10.5	6.5	0	0	2.5	middle
127	PC-3p-116_20839	CGGGAGTCTTGGCTTGAGGGT	up	1.46228	0.54822	0.120129	1845.18	2698.17	1236.07	2146.46	2153.01	2415.65	3312.83	2366.03	1165.5	2139.5	2245.5	2442	3444	2381	high
128	PC-5p-90717_64	ATCATGTGTCGGGGTTCCAACATA	up	2.64233	1.40181	0.120616	6.33092	16.7284	5.30275	6.01951	7.6705	24.7302	11.543	13.912	5	6	8	25	12	14	middle
129	gma-miR4995_L+1R+1	TAGGCAGTGGCTTGGTTAAGGGA	down	0.551505	-0.858554	0.121138	89.2814	49.2391	117.191	89.2894	61.364	70.7284	30.7813	46.2077	110.5	89	64	71.5	32	46.5	middle
130	PC-3p-123203_45	TTGCCCGGACCTTTCAAAATC	down	0.417139	-1.2614	0.121954	15.7035	6.55056	14.8477	14.0455	18.2174	0	6.7334	12.9183	14	14	19	0	7	13	middle
131	PC-5p-90046_64	AAAGAGGCCTCACACAACTAGTGT	up	1.53276	0.616136	0.122044	4.80266	7.36134	3.18165	4.51463	6.71169	7.91367	7.21436	6.956	3	4.5	7	8	7.5	7	low
132	PC-3p-90046_64	AAAGAGGCCTCACACAACTAGTGT	up	1.53276	0.616136	0.122044	4.80266	7.36134	3.18165	4.51463	6.71169	7.91367	7.21436	6.956	3	4.5	7	8	7.5	7	low
133	gma-miR4995_L+1R+2	TAGGCAGTGGCTTGGTTAAGGGAA	down	0.475687	-1.07192	0.122563	143.517	68.2693	205.216	119.387	105.949	93.4802	59.1578	52.17	193.5	119	110.5	94.5	61.5	52.5	middle
134	hbr-miR6173_L+1	TAGCCGTAAACGATGGATACT	down	0.52967	-0.916834	0.123362	60.3854	31.9844	83.2531	45.6479	52.2553	47.9766	21.6431	26.3334	78.5	45.5	54.5	48.5	22.5	26.5	middle
135	PC-5p-27915_193	TGCAATGCGTTCAAGGACTTT	up	1.62531	0.700715	0.125369	28.7754	46.769	36.0587	20.065	30.2026	54.4065	31.7432	54.1574	34	20	31.5	55	33	54.5	middle
136	stu-miR8021_1ss20GA	ATTCAAGGCTCAAACTCGAAACCT	up	6.17741	2.627	0.126308	0.958813	5.92297	0	0	2.87644	4.94604	2.88574	9.93714	0	0	3	5	3	10	low
137	PC-3p-7929_451	CGGGAGTCTTGGCTTGAGGC	up	1.6105	0.687509	0.130548	92.1917	148.475	47.7247	101.328	127.522	177.563	148.616	119.246	45	101	133	179.5	154.5	120	middle
138	hbr-miR6173	AGCCGTAAACGATGGATACT	down	0.613297	-0.705342	0.130656	37.7489	23.1513	42.422	29.5959	41.2289	34.6223	13.4668	21.3648	40	29.5	43	35	14	21.5	middle
139	PC-3p-31685_174	TCTTCTCCACGTCTATTCTAT	up	1.61559	0.692058	0.135158	10.9558	17.7001	9.54494	7.02276	16.2998	21.7626	13.9478	17.39	9	7	17	22	14.5	17.5	middle
140	PC-3p-137294_40	TTTGGAGAGTCCGAGTAGCATAGC	up	2.34386	1.22889	0.13532	2.43406	5.70511	0	2.50813	4.79406	4.45144	7.69532	4.96857	0	2.5	5	4.5	8	5	low
141	PC-3p-15187_302	TCCATGCCTTCCATTTGTCCC	up	1.24108	0.311591	0.135932	22.3108	27.6894	23.3321	21.0683	22.5321	30.1709	23.086	29.8114	22	21	23.5	30.5	24	30	middle
142	PC-5p-57929_101	GGGACATATGGGAATTCCAAGACT	up	1.70335	0.768374	0.135953	14.3573	24.4555	12.7266	14.0455	16.2998	24.7302	31.7432	16.8931	12	14	17	25	33	17	middle
143	nta-miR172j_L-1	GAATCTTGATGATGCTGCAT	down	0.385393	-1.3756	0.13705	8.60859	3.31769	10.454	6.87944	8.49234	0.989208	7.97015	0.993714	9.85714	6.85714	8.85714	1	8.28571	1	middle
144	nta-MIR172e-p5	GAATCTTGATGATGCTGCAT	down	0.385393	-1.3756	0.13705	8.60859	3.31769	10.454	6.87944	8.49234	0.989208	7.97015	0.993714	9.85714	6.85714	8.85714	1	8.28571	1	middle
145	gma-MIR4995-p5_1ss21GC_2	CAGTGGCTTGGTTAAGGGAACC	down	0.542597	-0.882048	0.137799	123.773	67.1589	162.794	107.85	100.675	112.77	37.0337	51.6731	153.5	107.5	105	114	38.5	52	middle
146	gma-MIR4995-p5_1ss21GC_1	CAGTGGCTTGGTTAAGGGAAC	down	0.542597	-0.882048	0.137799	123.773	67.1589	162.794	107.85	100.675	112.77	37.0337	51.6731	153.5	107.5	105	114	38.5	52	middle
147	gma-MIR4995-p5_1ss21GC_3	CAGTGGCTTGGTTAAGGGAACCC	down	0.542597	-0.882048	0.137799	123.773	67.1589	162.794	107.85	100.675	112.77	37.0337	51.6731	153.5	107.5	105	114	38.5	52	middle
148	gma-MIR4995-p3_1ss21GC	CAGTGGCTTGGTTAAGGGAAC	down	0.542597	-0.882048	0.137799	123.773	67.1589	162.794	107.85	100.675	112.77	37.0337	51.6731	153.5	107.5	105	114	38.5	52	middle
149	PC-5p-183768_27	AAATATTGGGCCTGCTCTATT	up	3.41289	1.771	0.137842	1.67209	5.70665	0	5.01626	0	6.92446	7.21436	2.98114	0	5	0	7	7.5	3	low
150	gma-miR4995_L-1R+3	GGCAGTGGCTTGGTTAAGGGAAC	down	0.555419	-0.848352	0.138648	68.849	38.24	93.3283	66.7162	46.5024	48.4712	25.0098	41.2391	88	66.5	48.5	49	26	41.5	middle
151	nta-MIR6163-p5_1ss20AG	TTATGGCATGTACGTTTGGGTC	down	0.772019	-0.373292	0.138847	333.761	257.67	390.282	330.07	280.932	206.745	275.108	291.158	368	329	293	209	286	293	middle
152	PC-5p-210102_22	AAACGTTTGACGCTTCTTCTCC	up	3.33059	1.73578	0.139057	1.67209	5.56904	0	5.01626	0	5.93525	4.80957	5.96228	0	5	0	6	5	6	low
153	nta-MIR6158b-p3	TTGAGCGGGTCGGCACTGGAGT	down	0.717077	-0.4798	0.13942	19.9136	14.2796	18.5596	20.5667	20.6145	15.3327	9.61915	17.8868	17.5	20.5	21.5	15.5	10	18	middle
154	nta-miR1446	TGAACTCTCTCCCTCAATGGCT	up	2.00561	1.00404	0.139494	23.1008	46.3312	11.666	24.078	33.5584	50.4496	26.9336	61.6103	11	24	35	51	28	62	middle
155	PC-3p-124568_45	TAACTTAATTTTCCCTCGTGTACC	up	2.30734	1.20623	0.139914	5.11175	11.7945	5.30275	10.0325	0	15.8273	9.61915	9.93714	5	10	0	16	10	10	middle
156	nta-MIR6161a-p3_2ss23TG24GC	ATTATGCTGGACCGGTATACTTGC	up	1.2582	0.331358	0.14122	515.076	648.067	424.573	493.433	627.223	705.141	609.213	629.849	400.333	491.833	654.167	712.833	633.333	633.833	middle
157	nta-MIR6161b-p3_2ss23TG24GC	ATTATGCTGGACCGGTATACTTGC	up	1.2582	0.331358	0.14122	515.076	648.067	424.573	493.433	627.223	705.141	609.213	629.849	400.333	491.833	654.167	712.833	633.333	633.833	middle
158	sly-miR164a-5p_L+1	CTGGAGAAGCAGGGCACGTGCA	up	1.70651	0.771051	0.142486	48.9518	83.5369	38.1798	29.0943	79.5814	77.6528	73.5865	99.3714	36	29	83	78.5	76.5	100	middle
159	bol-MIR9410-p3_2ss5TG18TA	CTTTGCAGACGACTTAAAT	down	0.164401	-2.60471	0.14265	9.02556	1.48381	11.1358	13.5439	2.39703	4.45144	0	0	10.5	13.5	2.5	4.5	0	0	middle
160	PC-5p-154319_34	AATCTCACAGGTGGGGTCTGAGGA	up	3.3257	1.73366	0.143925	2.55683	8.50327	0	0	7.6705	8.90287	8.65723	7.94971	0	0	8	9	9	8	low
161	PC-3p-256273_16	ATATCTCATACAACTAGTGTCAGT	down	0.410455	-1.28471	0.143964	8.05173	3.30487	6.36329	12.039	5.75288	4.94604	0	4.96857	6	12	6	5	0	5	middle
162	mtr-miR156g-5p	TTGACAGAAGATAGAGGGCAC	down	0.378581	-1.40132	0.147272	14.2127	5.38067	21.211	7.52439	13.9028	3.46223	7.21436	5.46543	20	7.5	14.5	3.5	7.5	5.5	middle
163	mtr-miR156e_1ss17AG	TTGACAGAAGATAGAGGGCAC	down	0.378581	-1.40132	0.147272	14.2127	5.38067	21.211	7.52439	13.9028	3.46223	7.21436	5.46543	20	7.5	14.5	3.5	7.5	5.5	middle
164	hbr-MIR6173-p3_1ss19AG	CGTATCGACCCGTGCAGTG	down	0.422205	-1.24399	0.148846	45.4301	19.1808	67.8751	40.1301	28.285	17.8057	15.3906	24.346	64	40	29.5	18	16	24.5	middle
165	PC-3p-181640_27	AATGTGTGAGATAAAAAGAGGTCT	up	2.32512	1.2173	0.149018	5.18773	12.0621	0	5.01626	10.5469	8.90287	16.3525	10.9309	0	5	11	9	17	11	middle
166	PC-5p-247730_17	TAAAGCAATTCGCAGTACTAT	down	0.169731	-2.55868	0.149077	4.87886	0.828095	3.71192	8.52764	2.39703	0	0	2.48428	3.5	8.5	2.5	0	0	2.5	low
167	PC-5p-11756_356	ATTGTCCGCTCTGGACCTAGGCCC	up	1.33632	0.418262	0.149676	54.3396	72.6149	62.5724	38.1236	62.3228	61.3309	75.0293	81.4845	59	38	65	62	78	82	middle
168	PC-3p-1837_1014	GGGGAATCCGACTGTTTAATT	down	0.548259	-0.867072	0.149898	1161.67	636.894	1497.5	1296.2	691.304	851.708	580.996	477.976	1412	1292	721	861	604	481	middle
169	nta-MIR167c-p3	AGGTCATCTAGCAGCTTCAAT	down	0.779494	-0.359391	0.151835	216.132	168.474	215.822	252.318	180.257	147.887	201.521	156.013	203.5	251.5	188	149.5	209.5	157	middle
170	nta-MIR167a-p3	AGGTCATCTAGCAGCTTCAAT	down	0.779494	-0.359391	0.151835	216.132	168.474	215.822	252.318	180.257	147.887	201.521	156.013	203.5	251.5	188	149.5	209.5	157	middle
171	sly-miR403-5p_1ss18AG	CGTTTGTGCGTGAATCTGACA	down	0.854381	-0.227049	0.153998	6641.26	5674.16	7506.04	6064.66	6353.09	6268.61	5263.12	5490.77	7077.5	6045	6626	6337	5471.5	5525.5	high
172	stu-miR166a-5p_L-1R+1	GAATGTTGTCTGGCTCGAGGA	up	2.30836	1.20687	0.154679	4.58556	10.5851	0	7.52439	6.23228	6.92446	15.3906	9.44028	0	7.5	6.5	7	16	9.5	middle
173	sly-miR396a-5p_L+1	CTTCCACAGCTTTCTTGAACTG	up	1.63958	0.713328	0.15653	166.234	272.555	170.218	131.928	196.557	214.658	230.86	372.146	160.5	131.5	205	217	240	374.5	middle
174	PC-5p-144735_37	TCGCACACCAATATTAGCATC	up	2.14186	1.09886	0.157006	2.59408	5.55614	4.77247	3.00975	0	3.95683	6.25245	6.45914	4.5	3	0	4	6.5	6.5	low
175	sly-MIR390a-p3_1ss1TC	CATAGCGCTATCCATCCTGAG	up	2.51817	1.33238	0.157613	4.99754	12.5847	6.36329	0	8.62931	5.93525	14.4287	17.39	6	0	9	6	15	17.5	middle
176	PC-5p-150626_35	ACCAGCTTTTAAGACAATCCGAAC	up	3.13345	1.64775	0.158173	2.82813	8.8618	8.48439	0	0	11.8705	5.77149	8.94342	8	0	0	12	6	9	middle
177	gma-miR4995_L-2R+5	GCAGTGGCTTGGTTAAGGGAACCC	down	0.52278	-0.935723	0.159381	208.144	108.813	296.423	186.103	141.904	171.628	66.3721	88.4405	279.5	185.5	148	173.5	69	89	middle
178	gma-MIR5368-p5_2ss20TC23CT	CCTGGGATTGGCTTTGGGCCTTT	down	0.612749	-0.706632	0.159562	9320.62	5711.2	12275.9	8784.47	6901.53	8407.28	4012.15	4714.18	11575	8756	7198	8499	4171	4744	high
179	sbi-MIR398-p3_2ss5GA18AG	GGGGACGGACTGGGAACG	down	0.421724	-1.24563	0.160999	25.5445	10.7727	37.6495	25.0813	13.9028	9.89208	12.9858	9.44028	35.5	25	14.5	10	13.5	9.5	middle
180	PC-3p-146013_37	AATCACTTATGTAGGACCGGAAGA	up	2.37032	1.24508	0.161384	6.27986	14.8853	0	14.0455	4.79406	17.8057	14.4287	12.4214	0	14	5	18	15	12.5	middle
181	PC-3p-124798_44	TTTAATTCTGCATAAATCTCC	down	0.558055	-0.84152	0.162499	8.45202	4.71669	11.666	6.01951	7.6705	4.45144	7.21436	2.48428	11	6	8	4.5	7.5	2.5	middle
182	gma-MIR4995-p3_1ss19GC_3	GTGGCTTGGTTAAGGGAACCC	down	0.468964	-1.09245	0.162934	48.8231	22.8963	72.6476	43.1398	30.682	30.6655	22.124	15.8994	68.5	43	32	31	23	16	middle
183	gma-MIR4995-p5_1ss19GC_2	GTGGCTTGGTTAAGGGAACC	down	0.468964	-1.09245	0.162934	48.8231	22.8963	72.6476	43.1398	30.682	30.6655	22.124	15.8994	68.5	43	32	31	23	16	middle
184	gma-MIR4995-p3_1ss19GC_2	GTGGCTTGGTTAAGGGAACC	down	0.468964	-1.09245	0.162934	48.8231	22.8963	72.6476	43.1398	30.682	30.6655	22.124	15.8994	68.5	43	32	31	23	16	middle
185	gma-MIR4995-p3_1ss19GC_1	GTGGCTTGGTTAAGGGAAC	down	0.468964	-1.09245	0.162934	48.8231	22.8963	72.6476	43.1398	30.682	30.6655	22.124	15.8994	68.5	43	32	31	23	16	middle
186	gma-MIR4995-p5_1ss19GC_1	GTGGCTTGGTTAAGGGAAC	down	0.468964	-1.09245	0.162934	48.8231	22.8963	72.6476	43.1398	30.682	30.6655	22.124	15.8994	68.5	43	32	31	23	16	middle
187	gma-miR4995_L+4R-1	TCATAGGCAGTGGCTTGGTTAAGG	down	0.490205	-1.02854	0.164472	55.3583	27.1369	77.9504	52.1691	35.9555	48.4712	10.5811	22.3586	73.5	52	37.5	49	11	22.5	middle
188	PC-5p-179923_28	AACTGACACTAGCGGTATGAGGCA	down	0.325506	-1.61924	0.164631	7.09096	2.30815	9.54494	5.01626	6.71169	6.92446	0	0	9	5	7	7	0	0	low
189	gma-miR4995_L-2R+3	GCAGTGGCTTGGTTAAGGGAAC	down	0.517804	-0.949523	0.165628	161.028	83.3809	235.442	135.941	111.702	120.189	66.8531	63.1008	222	135.5	116.5	121.5	69.5	63.5	middle
190	PC-5p-1979_976	AAGTTTTACCGCTCTCCACTTTCA	up	1.3337	0.415429	0.165661	78.5639	104.78	66.2843	79.7585	89.649	115.737	79.358	119.246	62.5	79.5	93.5	117	82.5	120	middle
191	gma-miR6300	GTCGTTGTAGTATAGTGG	down	0.407358	-1.29563	0.166633	18.1378	7.38859	20.6807	25.5829	8.14991	7.41906	4.80957	9.93714	19.5	25.5	8.5	7.5	5	10	middle
192	nta-MIR396a-p3	TTCAATAAGGCTGTGGGAAGA	down	0.810497	-0.303122	0.167495	1538.98	1247.34	1706.42	1570.09	1340.42	1495.68	1035.98	1210.34	1609	1565	1398	1512	1077	1218	high
193	PC-3p-144149_37	AGGTCTCGCACAACTAATGTCAGT	down	0.459008	-1.12341	0.167634	9.30385	4.27054	10.0752	13.0423	4.79406	2.47302	2.88574	7.45285	9.5	13	5	2.5	3	7.5	middle
194	gma-MIR5368-p3_1ss19CT	TAGAATTCTAACCTTGTGTCAGGA	down	0.626582	-0.674425	0.168471	10417.5	6527.44	13172	10677.6	7402.99	9605.21	4201.64	5775.46	12420	10643	7721	9710	4368	5812	high
195	PC-3p-16651_284	CGGGAGTCTTGGCTTGAGGGTA	up	1.58451	0.664035	0.168757	49.3987	78.2727	22.8018	60.1951	65.1993	93.4802	83.2056	58.1323	21.5	60	68	94.5	86.5	58.5	middle
196	PC-3p-179814_28	AGCCGGTGGATGTATAATATATGC	up	3.05847	1.61281	0.170023	2.23723	6.84249	0	0	6.71169	4.94604	9.61915	5.96228	0	0	7	5	10	6	low
197	PC-3p-138887_39	TGGCACTCTCTAGAATGGTGGT	up	2.20483	1.14067	0.171064	4.00481	8.82992	5.30275	0	6.71169	4.94604	9.61915	11.9246	5	0	7	5	10	12	middle
198	nta-MIR168e-p3	TCCCGCCTTGCATCAACTGAAT	up	1.32745	0.408659	0.171712	878.811	1166.58	759.495	715.753	1161.19	1045.92	1326.48	1127.34	716.133	713.433	1211.07	1057.33	1379	1134.47	middle
199	nta-MIR168d-p3	TCCCGCCTTGCATCAACTGAAT	up	1.32745	0.408659	0.171712	878.811	1166.58	759.495	715.753	1161.19	1045.92	1326.48	1127.34	716.133	713.433	1211.07	1057.33	1379	1134.47	middle
200	nta-MIR168c-p3	TCCCGCCTTGCATCAACTGAAT	up	1.32745	0.408659	0.171712	878.811	1166.58	759.495	715.753	1161.19	1045.92	1326.48	1127.34	716.133	713.433	1211.07	1057.33	1379	1134.47	middle
201	nta-MIR168b-p3	TCCCGCCTTGCATCAACTGAAT	up	1.32745	0.408659	0.171712	878.811	1166.58	759.495	715.753	1161.19	1045.92	1326.48	1127.34	716.133	713.433	1211.07	1057.33	1379	1134.47	middle
202	nta-MIR168a-p3	TCCCGCCTTGCATCAACTGAAT	up	1.32745	0.408659	0.171712	878.811	1166.58	759.495	715.753	1161.19	1045.92	1326.48	1127.34	716.133	713.433	1211.07	1057.33	1379	1134.47	middle
203	bol-MIR9410-p5_2ss5TG18TA	CTTTGCAGACGACTTAAATA	down	0.331594	-1.59251	0.172431	23.1874	7.68882	31.8165	29.5959	8.14991	10.3867	7.21436	5.46543	30	29.5	8.5	10.5	7.5	5.5	middle
204	osa-miR156b-3p_L+1_3ss9-T14AT23CT	TGCTCACTTCTCTTTCTGTCAGT	down	0.488731	-1.03289	0.173119	9.47008	4.62832	11.666	10.0325	6.71169	5.93525	0	7.94971	11	10	7	6	0	8	middle
205	PC-5p-154453_34	AAACGAGGACGACCAAATAGGGCG	up	2.02813	1.02015	0.173568	3.71912	7.54286	6.36329	0	4.79406	7.91367	5.77149	8.94342	6	0	5	8	6	9	low
206	gma-miR4995_R+3	AGGCAGTGGCTTGGTTAAGGGAAC	down	0.580442	-0.784777	0.173828	153.845	89.2979	217.413	121.393	122.728	129.092	69.7388	69.0631	205	121	128	130.5	72.5	69.5	middle
207	PC-5p-11406_363	GATTGATGGGAGTCGTGGATTGAT	up	1.36447	0.448343	0.175397	50.953	69.5239	61.5118	49.1593	42.1878	83.0935	51.9434	73.5348	58	49	44	84	54	74	middle
208	nta-MIR397-p3	TCATCTGCGCTGCACTCAATCA	up	1.1709	0.227618	0.175551	89.2246	104.473	101.813	86.2796	79.5814	114.748	92.3438	106.327	96	86	83	116	96	107	middle
209	ath-miR396b-5p_R+2_1	TTCCACAGCTTTCTTGAACTTTC	up	2.22122	1.15135	0.1758	5.03145	11.176	7.42384	0	7.6705	14.8381	5.77149	12.9183	7	0	8	15	6	13	middle
210	stu-MIR8005a-p3_1ss5GA	GTTTAGGGTTTAGGGTTTAGGGTT	up	2.06883	1.04881	0.17683	8.2123	16.9899	0	15.0488	9.58813	14.8381	19.2383	16.8931	0	15	10	15	20	17	middle
211	PC-3p-39683_143	AGGCCTCACACAACTAGCATCAGT	up	1.53609	0.619264	0.177796	15.3871	23.6359	13.7871	16.5537	15.8204	25.2248	15.8716	29.8114	13	16.5	16.5	25.5	16.5	30	middle
212	osa-MIR2118e-p3_1ss13TA	GAAAAGAGAGTCAAAGAG	down	0.225493	-2.14884	0.178378	8.04258	1.81355	14.3174	5.01626	4.79406	5.44065	0	0	13.5	5	5	5.5	0	0	middle
213	ptc-miR397a_L-2R+2	ATTGAGTGCAGCGTTGATGAA	down	0.774481	-0.368698	0.179271	84.8834	65.7406	100.752	86.7813	67.1169	56.3849	68.2959	72.5411	95	86.5	70	57	71	73	middle
214	PC-3p-85784_68	TAGATTCAGAACCATCAAATT	down	0.367907	-1.44259	0.18026	8.35147	3.07256	11.666	10.0325	3.35584	0	6.7334	2.48428	11	10	3.5	0	7	2.5	middle
215	hbr-MIR6173-p5_2ss1TG17GA	GAAAGCTAGGGGAGCGAA	down	0.543449	-0.879785	0.180879	95.1366	51.7018	134.69	90.7943	59.9258	57.8687	49.5386	47.6983	127	90.5	62.5	58.5	51.5	48	middle
216	nta-MIR6152b-p5_1ss10AG	ATTCACGGCGTGAAATAGGGGATT	up	1.30418	0.383147	0.182968	137.833	179.759	98.6311	160.019	154.848	157.779	213.064	168.434	93	159.5	161.5	159.5	221.5	169.5	middle
217	PC-3p-546606_5	AGGTCAATAGGACGATGACACGTG	up	inf	inf	0.183506	0	3.30487	0	0	0	4.94604	0	4.96857	0	0	0	5	0	5	low
218	PC-3p-521829_6	AAACTGTGAGACAAAAAAGATGCC	up	inf	inf	0.183506	0	3.96584	0	0	0	5.93525	0	5.96228	0	0	0	6	0	6	low
219	PC-3p-310612_12	ACTAATGTCAGTTGTGTGTGAGGC	up	inf	inf	0.183506	0	3.96584	0	0	0	5.93525	0	5.96228	0	0	0	6	0	6	low
220	PC-5p-315142_12	ATGTCCGTCGTTATTAGTTTGGCC	up	inf	inf	0.183506	0	3.96584	0	0	0	5.93525	0	5.96228	0	0	0	6	0	6	low
221	PC-3p-401061_7	AGACGACATGGATATTTTTGGTAC	up	inf	inf	0.183506	0	4.62682	0	0	0	6.92446	0	6.956	0	0	0	7	0	7	low
222	PC-5p-363231_10	AAAAAAGTCTCTAGAGCTTACGCC	up	inf	inf	0.183583	0	3.25187	0	0	0	4.94604	4.80957	0	0	0	0	5	5	0	low
223	PC-3p-347993_10	ATTATCGTCTCTCGGTGCTACGTT	up	inf	inf	0.183583	0	3.25187	0	0	0	4.94604	4.80957	0	0	0	0	5	5	0	low
224	PC-3p-356804_10	AACATGTTATGCTGGAAGTTCACA	up	inf	inf	0.183583	0	3.25187	0	0	0	4.94604	4.80957	0	0	0	0	5	5	0	low
225	PC-5p-348502_10	AAGAATTATTTGCACTATCATGTT	up	inf	inf	0.183583	0	3.25187	0	0	0	4.94604	4.80957	0	0	0	0	5	5	0	low
226	PC-5p-557496_5	AAGGGTCGGGTCAAAAAACATGTA	up	inf	inf	0.183611	0	3.25938	0	0	0	0	4.80957	4.96857	0	0	0	0	5	5	low
227	PC-3p-344533_10	ACAGAGGATTATGATTGAAGGATC	up	inf	inf	0.183611	0	3.25938	0	0	0	0	4.80957	4.96857	0	0	0	0	5	5	low
228	PC-3p-150382_35	ACCGGGAACTGGACTTGTTTCACA	down	0.508769	-0.974917	0.184084	7.68769	3.91126	6.36329	9.02926	7.6705	0	5.77149	5.96228	6	9	8	0	6	6	low
229	PC-5p-334291_11	AAACTTCTTTATAACAGCCTCGTT	down	-inf	-inf	0.184179	3.68521	0	5.30275	0	5.75288	0	0	0	5	0	6	0	0	0	low
230	nta-MIR6152b-p5_2ss16TC18GA	ATTCACGGCATGAAACAAGGGATT	up	2.96411	1.5676	0.184271	0.883791	2.61965	2.65137	0	0	2.47302	2.40479	2.98114	2.5	0	0	2.5	2.5	3	low
231	nta-MIR6152b-p3_2ss16TC18GA	ATTCACGGCATGAAACAAGGGATT	up	2.96411	1.5676	0.184271	0.883791	2.61965	2.65137	0	0	2.47302	2.40479	2.98114	2.5	0	0	2.5	2.5	3	low
232	PC-5p-250550_17	TCTATGTTTGACAAGTGGAAT	up	inf	inf	0.184324	0	2.76182	0	0	0	3.95683	4.32862	0	0	0	0	4	4.5	0	low
233	ptc-miR171e_R+2_1ss21CT	TGATTGAGCCGTGCCAATATTTT	down	-inf	-inf	0.184538	3.3656	0	5.30275	0	4.79406	0	0	0	5	0	5	0	0	0	low
234	hbr-MIR6173-p3_1	GCTGTGCGTATCGACCCGTG	down	-inf	-inf	0.184538	2.01936	0	3.18165	0	2.87644	0	0	0	3	0	3	0	0	0	low
235	PC-3p-308773_12	ACTGGAAACTTTAGCTCTAGAACT	down	-inf	-inf	0.184538	4.03872	0	6.36329	0	5.75288	0	0	0	6	0	6	0	0	0	low
236	PC-5p-473015_6	AGTTATGTGAGGCTCCTTGTTGTC	down	-inf	-inf	0.184538	4.03872	0	6.36329	0	5.75288	0	0	0	6	0	6	0	0	0	low
237	PC-3p-345307_10	AGAGACCGGCCCGGGACCGTAACC	down	-inf	-inf	0.184538	3.3656	0	5.30275	0	4.79406	0	0	0	5	0	5	0	0	0	low
238	PC-3p-680797_5	TTTACTCTGTCAATGTATATAAC	down	-inf	-inf	0.184538	3.3656	0	5.30275	0	4.79406	0	0	0	5	0	5	0	0	0	low
239	PC-5p-357586_10	ATTCGATAGCCGGAAGAGTGTATA	down	-inf	-inf	0.184538	3.3656	0	5.30275	0	4.79406	0	0	0	5	0	5	0	0	0	low
240	sly-MIR396b-p3_1ss19GA	AAGCTGTGGGAAAAGATGACA	down	0.576983	-0.793399	0.184581	15.2826	8.81782	21.211	15.0488	9.58813	5.93525	10.5811	9.93714	20	15	10	6	11	10	middle
241	PC-5p-334700_11	AACGGTCCAGTATAATATGCTTGA	down	-inf	-inf	0.185407	3.58971	0	0	5.01626	5.75288	0	0	0	0	5	6	0	0	0	low
242	gma-miR4995_L+1R+3	TAGGCAGTGGCTTGGTTAAGGGAAC	down	0.517963	-0.94908	0.185535	105.369	54.577	147.416	106.846	61.8434	91.0072	24.5288	48.1951	139	106.5	64.5	92	25.5	48.5	middle
243	PC-5p-426366_7	ATAGCACGGTATTTCACCGCA	up	inf	inf	0.18577	0	4.29558	0	0	0	6.92446	0	5.96228	0	0	0	7	0	6	low
244	stu-MIR5303h-p5_2ss12TG24TC	ACTCTCCAAAAGTGTTGCCGCACC	up	inf	inf	0.185776	0	3.58002	0	0	0	0	5.77149	4.96857	0	0	0	0	6	5	low
245	PC-5p-440805_6	ATACTAGAGTTCGGTGCATCTGTG	up	inf	inf	0.185776	0	3.58002	0	0	0	0	5.77149	4.96857	0	0	0	0	6	5	low
246	PC-3p-452378_6	ATTGAAATACCAAGATACCGAGAT	up	inf	inf	0.185914	0	3.57251	0	0	0	4.94604	5.77149	0	0	0	0	5	6	0	low
247	PC-3p-309582_12	AAAGATACCTCATACAACTAGTCT	up	inf	inf	0.186174	0	7.93019	0	0	0	12.8597	0	10.9309	0	0	0	13	0	11	middle
248	nta-miR171b	TTGAGCCGCGCCAATATCACT	up	1.26686	0.341256	0.186353	615.757	780.077	640.041	456.479	750.75	779.991	718.069	842.172	603.5	455	783	788.5	746.5	847.5	middle
249	PC-3p-252142_17	GACCGCGGTTTCTCTGTATAAC	down	-inf	-inf	0.186537	2.92849	0	4.77247	4.01301	0	0	0	0	4.5	4	0	0	0	0	low
250	PC-5p-294893_13	TCTCATTGGTGATATCGTGACT	up	inf	inf	0.18685	0	2.11599	0	0	0	3.46223	2.88574	0	0	0	0	3.5	3	0	low
251	PC-3p-289777_13	AATCGAATACCGAACCGAAGTACC	up	inf	inf	0.18685	0	4.23198	0	0	0	6.92446	5.77149	0	0	0	0	7	6	0	low
252	mtr-miR171c	TGATTGAGCCGTGCCAATATT	up	inf	inf	0.187017	0	2.12125	0	0	0	0	2.88574	3.478	0	0	0	0	3	3.5	low
253	PC-3p-292422_13	ATACCTTACCCCTACATTGTGAGA	up	inf	inf	0.187017	0	4.24249	0	0	0	0	5.77149	6.956	0	0	0	0	6	7	low
254	PC-5p-321026_11	AACCTATGTTACTTGGACTCTCCA	up	inf	inf	0.187024	0	3.63611	0	0	0	4.94604	0	5.96228	0	0	0	5	0	6	low
255	nta-MIR6164b-p5	ACCTTTATGCAATGATTTATAGCC	up	1.19021	0.251215	0.187045	1110.95	1322.27	967.751	1119.13	1245.98	1422.98	1114.86	1428.96	912.5	1115.5	1299.5	1438.5	1159	1438	middle
256	PC-5p-289365_13	AAAGTATTTCGTGTTCATGCAGGA	down	-inf	-inf	0.187507	4.25855	0	0	7.02276	5.75288	0	0	0	0	7	6	0	0	0	low
257	PC-5p-169595_30	ATTTCATGCCACTGCCGTTACACA	up	2.28483	1.19208	0.188288	4.74576	10.8432	8.48439	0	5.75288	15.8273	5.77149	10.9309	8	0	6	16	6	11	middle
258	PC-5p-249931_17	TTTTCTTTCCGGTATAATGCT	down	-inf	-inf	0.188301	2.86924	0	4.77247	0	3.83525	0	0	0	4.5	0	4	0	0	0	low
259	PC-3p-531379_6	AAAGTTGGGTAACGTTGAGGGTGG	down	-inf	-inf	0.188696	3.60452	0	0	6.01951	4.79406	0	0	0	0	6	5	0	0	0	low
260	hbr-MIR6173-p5_3	GATTAGATACCCCAGTAGTCCT	down	0.651504	-0.618154	0.188854	45.5515	29.677	60.9816	41.6349	34.0378	40.5575	21.6431	26.8303	57.5	41.5	35.5	41	22.5	27	middle
261	hbr-MIR6173-p5_6	TTAGATACCCCAGTAGTCC	down	0.651504	-0.618154	0.188854	45.5515	29.677	60.9816	41.6349	34.0378	40.5575	21.6431	26.8303	57.5	41.5	35.5	41	22.5	27	middle
262	hbr-MIR6173-p5_7	TTAGATACCCCAGTAGTCCT	down	0.651504	-0.618154	0.188854	45.5515	29.677	60.9816	41.6349	34.0378	40.5575	21.6431	26.8303	57.5	41.5	35.5	41	22.5	27	middle
263	hbr-MIR6173-p5_1	CGCTGTGCGTATCGACCCGTG	down	0.651504	-0.618154	0.188854	45.5515	29.677	60.9816	41.6349	34.0378	40.5575	21.6431	26.8303	57.5	41.5	35.5	41	22.5	27	middle
264	hbr-MIR6173-p3_2	TGCGTATCGACCCGTGCA	down	0.651504	-0.618154	0.188854	45.5515	29.677	60.9816	41.6349	34.0378	40.5575	21.6431	26.8303	57.5	41.5	35.5	41	22.5	27	middle
265	hbr-MIR6173-p5_5	TGTGCGTATCGACCCGTG	down	0.651504	-0.618154	0.188854	45.5515	29.677	60.9816	41.6349	34.0378	40.5575	21.6431	26.8303	57.5	41.5	35.5	41	22.5	27	middle
266	hbr-MIR6173-p5_4	TGCGTATCGACCCGTGCA	down	0.651504	-0.618154	0.188854	45.5515	29.677	60.9816	41.6349	34.0378	40.5575	21.6431	26.8303	57.5	41.5	35.5	41	22.5	27	middle
267	hbr-MIR6173-p5_2	GAATGGGATTAGATACCCC	down	0.651504	-0.618154	0.188854	45.5515	29.677	60.9816	41.6349	34.0378	40.5575	21.6431	26.8303	57.5	41.5	35.5	41	22.5	27	middle
268	PC-5p-338762_11	TCCAAGGGTCTTTCCTCCAAG	down	-inf	-inf	0.189164	3.79318	0	6.36329	5.01626	0	0	0	0	6	5	0	0	0	0	low
269	PC-3p-227165_20	AAGAAAGCATCTGACATCCCT	down	-inf	-inf	0.189549	6.55503	0	0	11.0358	8.62931	0	0	0	0	11	9	0	0	0	middle
270	cst-MIR11334-p5_2ss9TG18TC_1	TAAGGAGTGTGTAACAAC	down	0.256667	-1.96203	0.189878	10.6185	2.72542	16.4385	12.5406	2.87644	0	8.17627	0	15.5	12.5	3	0	8.5	0	middle
271	cst-MIR11334-p5_2ss9TG18TC_2	TAAGGAGTGTGTAACAACT	down	0.256667	-1.96203	0.189878	10.6185	2.72542	16.4385	12.5406	2.87644	0	8.17627	0	15.5	12.5	3	0	8.5	0	middle
272	PC-3p-389561_8	TTTGAGGAGTTCGAGCAACATAGC	up	inf	inf	0.189998	0	4.55253	0	0	0	0	7.69532	5.96228	0	0	0	0	8	6	low
273	PC-3p-53084_110	ATGTCTCATACAACTAGTGTCAGT	down	0.707539	-0.499119	0.190844	21.2978	15.069	18.0293	18.0585	27.8056	12.8597	13.4668	18.8806	17	18	29	13	14	19	middle
274	gma-MIR4995-p3_2ss15GC20TC_1	CTTGGTTAAGGGAACCCACCGGA	down	0.538613	-0.892678	0.191292	114.916	61.8953	158.022	124.403	62.3228	73.2014	69.2579	43.2266	149	124	65	74	72	43.5	middle
275	gma-MIR4995-p3_2ss15GC20TC_2	CTTGGTTAAGGGAACCCACCGGAGC	down	0.538613	-0.892678	0.191292	114.916	61.8953	158.022	124.403	62.3228	73.2014	69.2579	43.2266	149	124	65	74	72	43.5	middle
276	PC-5p-282423_14	GAAACTCCGTCACATTATGCTGGA	up	inf	inf	0.191865	0	6.16491	0	0	0	7.91367	10.5811	0	0	0	0	8	11	0	middle
277	PC-5p-421971_7	CTATTGGCCAGGTTCACTCAGA	down	-inf	-inf	0.191904	1.95466	0	0	2.50813	3.35584	0	0	0	0	2.5	3.5	0	0	0	low
278	PC-3p-33143_168	AGTAAATAAAGGGTACGATTGAGC	up	1.36532	0.44924	0.19198	23.4676	32.0409	25.4532	19.0618	25.8879	39.5683	32.7051	23.8491	24	19	27	40	34	24	middle
279	PC-3p-436954_7	AAACAAGATAAGAATTTTCTAGCC	up	inf	inf	0.1929	0	3.89315	0	0	0	4.94604	6.7334	0	0	0	0	5	7	0	low
280	PC-3p-278043_14	ATTTGTACCTCTAACCAAACAAGG	up	inf	inf	0.193601	0	4.57373	0	0	0	0	5.77149	7.94971	0	0	0	0	6	8	low
281	gma-miR4995_L-2R+2	GCAGTGGCTTGGTTAAGGGAA	down	0.605357	-0.724143	0.194319	15.4298	9.34051	21.7413	13.0423	11.5058	13.3543	7.21436	7.45285	20.5	13	12	13.5	7.5	7.5	middle
282	PC-3p-136600_40	TCTTCTCATGGGGCAAGCGGG	up	2.15135	1.10525	0.194781	2.96122	6.37063	2.65137	0	6.23228	5.93525	7.21436	5.96228	2.5	0	6.5	6	7.5	6	low
283	mdm-MIR169g-p3_1ss21GT	CAAGTTGTCCCTGGCTACATTT	up	inf	inf	0.194903	0	3.96735	0	0	0	4.94604	0	6.956	0	0	0	5	0	7	low
284	lja-MIR11104-p5_1ss19GA	ATGGGTTTGGCTCGTTGGACCAGC	up	inf	inf	0.194903	0	1.98367	0	0	0	2.47302	0	3.478	0	0	0	2.5	0	3.5	low
285	PC-3p-318152_12	ATTCAGGATCTTAAAGCAACCGAG	up	inf	inf	0.194903	0	3.96735	0	0	0	4.94604	0	6.956	0	0	0	5	0	7	low
286	PC-5p-302557_12	TTAGGCTCCAAGAATCAAGATA	up	inf	inf	0.194903	0	3.96735	0	0	0	4.94604	0	6.956	0	0	0	5	0	7	low
287	csi-miR1515a	TCATTTTTGCGTGCAATGATCC	down	0.774071	-0.369462	0.195539	11.413	8.83451	10.6055	14.0455	9.58813	8.90287	8.65723	8.94342	10	14	10	9	9	9	middle
288	nta-miR159	TTTGGATTGAAGGGAGCTCTA	down	0.84168	-0.248656	0.196625	277205	233318	311609	239084	280921	267605	230152	202197	293819	238309	292988	270524	239264	203476	high
289	PC-3p-318504_12	AGGGGTTTCCAGAACCGTCGTGCC	up	inf	inf	0.196761	0	3.92186	0	0	0	0	4.80957	6.956	0	0	0	0	5	7	low
290	PC-5p-286224_13	TATGTTGCGCGGGACTCTCCG	down	-inf	-inf	0.196772	4.32442	0	5.30275	0	7.6705	0	0	0	5	0	8	0	0	0	low
291	PC-3p-60678_96	TGCTATTGCTCCTTTCTTTC	down	0.435404	-1.19957	0.199143	24.0108	10.4544	32.3467	30.0975	9.58813	11.8705	11.543	7.94971	30.5	30	10	12	12	8	middle
292	stu-miR171d-5p	AGATATTGGTGCGGTTCAATT	up	1.97694	0.983266	0.199272	12.6809	25.0694	11.666	11.0358	15.341	14.8381	37.5147	22.8554	11	11	16	15	39	23	middle
293	stu-miR171c-3p	TGATTGAGCCGTGTCAATATC	up	inf	inf	0.199489	0	4.41341	0	0	0	0	5.29053	7.94971	0	0	0	0	5.5	8	low
294	vvi-MIR156h-p5_2ss13GT22TC	AATGACAGAAGATAGAGAGCAC	down	-inf	-inf	0.20003	4.44292	0	5.30275	8.02601	0	0	0	0	5	8	0	0	0	0	low
295	stu-miR398a-3p	TATGTTCTCAGGTCGCCCCTG	down	0.705725	-0.502822	0.200157	183.734	129.666	225.367	169.55	156.286	77.1582	140.92	170.919	212.5	169	163	78	146.5	172	middle
296	nta-MIR6147-p3	GTGGGTATTGAAGATGTTATG	down	0.352873	-1.50278	0.200266	6.36054	2.24447	5.30275	8.02601	5.75288	0	6.7334	0	5	8	6	0	7	0	low
297	PC-3p-12397_345	AGGGCTGAACAATTGTGAAGGAGA	up	1.36843	0.452521	0.201058	50.5479	69.1713	43.4825	39.1268	69.0345	69.2446	55.7911	82.4782	41	39	72	70	58	83	middle
298	nta-MIR477a-p3	GAGGTCTTTCGAGTGAGAGTGG	up	inf	inf	0.201482	0	4.89145	0	0	0	8.90287	5.77149	0	0	0	0	9	6	0	low
299	PC-5p-376545_8	AACCCGTAGCTCGTGCTCTAGC	up	inf	inf	0.202154	0	4.21379	0	0	0	4.94604	7.69532	0	0	0	0	5	8	0	low
300	PC-3p-298296_13	AAAGAGCCTCATACAACTAGTGTA	up	inf	inf	0.202154	0	2.10689	0	0	0	2.47302	3.84766	0	0	0	0	2.5	4	0	low
301	peu-MIR2916-p5_2ss5AG20TG	GGGGGCTCGAAGACGATCAGATACC	down	0.578145	-0.790497	0.202209	4483.34	2592.02	6167.09	4692.21	2590.71	3472.12	1919.02	2384.91	5815	4677	2702	3510	1995	2400	high
302	mtr-MIR2592bj-p5_2ss12TC19AT_2	ATTCCCACTGTCCCTGTCTA	down	0.462271	-1.11319	0.202375	62.3115	28.8048	84.8439	75.2439	26.8468	31.1601	26.9336	28.3208	80	75	28	31.5	28	28.5	middle
303	mtr-MIR2592bj-p5_2ss12TC19AT_1	ATTCCCACTGTCCCTGTCT	down	0.462271	-1.11319	0.202375	62.3115	28.8048	84.8439	75.2439	26.8468	31.1601	26.9336	28.3208	80	75	28	31.5	28	28.5	middle
304	mtr-MIR2592bj-p3_2ss12TC19AT_1	ATTCCCACTGTCCCTGTCT	down	0.462271	-1.11319	0.202375	62.3115	28.8048	84.8439	75.2439	26.8468	31.1601	26.9336	28.3208	80	75	28	31.5	28	28.5	middle
305	mtr-MIR2592bj-p3_2ss12TC19AT_2	ATTCCCACTGTCCCTGTCTA	down	0.462271	-1.11319	0.202375	62.3115	28.8048	84.8439	75.2439	26.8468	31.1601	26.9336	28.3208	80	75	28	31.5	28	28.5	middle
306	cca-MIR156c-p5_2ss7CT17AC	AGAGCATTGAGAGGACCT	down	0.403677	-1.30873	0.203816	6.95981	2.80951	11.1358	3.51138	6.23228	3.95683	0	4.47171	10.5	3.5	6.5	4	0	4.5	middle
307	PC-5p-382125_8	ATTCACCACTGATACGGGCCGAGA	up	inf	inf	0.204789	0	4.29858	0	0	0	4.94604	0	7.94971	0	0	0	5	0	8	low
308	PC-5p-57597_101	TGTGAAGGAGAGTGGCTAGATC	down	0.720409	-0.473112	0.207104	10.8828	7.84005	9.01467	14.0455	9.58813	9.39748	8.65723	5.46543	8.5	14	10	9.5	9	5.5	middle
309	sly-miR396a-3p_1ss11GT	GTTCAATAAATCTGTGGGAAG	down	0.725959	-0.46204	0.207579	34.1914	24.8215	29.1651	44.6447	28.7644	22.7518	28.8574	22.8554	27.5	44.5	30	23	30	23	middle
310	lus-miR166a_L+2	AATCGGACCAGGCTTCATTCCCC	up	1.31753	0.397835	0.207802	1003.73	1322.44	1070.09	984.19	956.895	1355.22	1003.28	1608.82	1009	981	998	1370	1043	1619	middle
311	gma-MIR4995-p5_1ss20GC	AGTGGCTTGGTTAAGGGAAC	down	0.557157	-0.843844	0.208251	195.143	108.725	288.469	167.041	129.919	159.757	75.9913	90.428	272	166.5	135.5	161.5	79	91	middle
312	PC-5p-298790_13	TTTTGAAGGGTCCGCGCAATA	down	-inf	-inf	0.208275	4.27336	0	0	8.02601	4.79406	0	0	0	0	8	5	0	0	0	low
313	PC-3p-375241_8	AATGGCATGGATGGACCAAATGTG	down	-inf	-inf	0.208275	2.13668	0	0	4.01301	2.39703	0	0	0	0	4	2.5	0	0	0	low
314	stu-MIR8021-p5_2ss19TC20CT	AGGCTCAAACTCGAGACCCTTGGT	up	1.71178	0.775498	0.208634	10.3654	17.7432	10.6055	8.02601	12.4646	17.8057	10.5811	24.8428	10	8	13	18	11	25	middle
315	rgl-miR7972	TTGTCAGGCTTGTTATTCTCC	down	-inf	-inf	0.20918	2.25011	0	4.2422	2.50813	0	0	0	0	4	2.5	0	0	0	0	low
316	PC-5p-377005_8	ATTGCTCGGACTTTCCAAAATGTT	down	-inf	-inf	0.20918	4.50022	0	8.48439	5.01626	0	0	0	0	8	5	0	0	0	0	low
317	PC-5p-290883_13	AGGTATAGCGTCGTTTATTAAGGC	down	-inf	-inf	0.20918	4.50022	0	8.48439	5.01626	0	0	0	0	8	5	0	0	0	0	low
318	bol-MIR9410-p5_2ss4TG17TA_2	TTTGCAGACGACTTAAATA	down	0.622237	-0.684465	0.209702	27.3107	16.9937	36.0587	29.0943	16.7792	22.7518	17.7954	10.434	34	29	17.5	23	18.5	10.5	middle
319	bol-MIR9410-p3_2ss4TG17TA	TTTGCAGACGACTTAAATA	down	0.622237	-0.684465	0.209702	27.3107	16.9937	36.0587	29.0943	16.7792	22.7518	17.7954	10.434	34	29	17.5	23	18.5	10.5	middle
320	bol-MIR9410-p5_2ss4TG17TA_1	TTTGCAGACGACTTAAAT	down	0.622237	-0.684465	0.209702	27.3107	16.9937	36.0587	29.0943	16.7792	22.7518	17.7954	10.434	34	29	17.5	23	18.5	10.5	middle
321	PC-5p-277595_14	ATCTCCCGGGATAGTTGAAACATC	down	-inf	-inf	0.209779	4.77734	0	5.30275	9.02926	0	0	0	0	5	9	0	0	0	0	low
322	PC-5p-232412_19	AGGGCTGTTATTTAGGGATTAGTC	up	inf	inf	0.209977	0	6.2755	0	0	0	11.8705	0	6.956	0	0	0	12	0	7	middle
323	PC-5p-58829_99	CAAATAGCTCTGGACCCACAAG	up	1.99822	0.998712	0.210933	15.9304	31.8324	23.3321	11.0358	13.4234	49.4604	20.2002	25.8366	22	11	14	50	21	26	middle
324	PC-5p-207944_22	TTTCGCACCAGACCTCTTGATGGA	up	3.92939	1.9743	0.213191	2.43406	9.56438	0	2.50813	4.79406	9.89208	2.40479	16.3963	0	2.5	5	10	2.5	16.5	middle
325	PC-3p-296966_13	ATGGGTCCACAAAACTATGAAACA	down	-inf	-inf	0.21332	4.42615	0	8.48439	0	4.79406	0	0	0	8	0	5	0	0	0	low
326	PC-3p-253061_17	TTGATACTGTGACTCTTTTCT	up	inf	inf	0.213579	0	5.51445	0	0	0	0	10.5811	5.96228	0	0	0	0	11	6	middle
327	PC-3p-50013_116	ATTGAGCGGAAAGAATACAAA	down	0.657067	-0.605887	0.214624	19.5636	12.8546	24.9229	15.5504	18.2174	7.91367	19.7193	10.9309	23.5	15.5	19	8	20.5	11	middle
328	PC-3p-209730_22	GTGCCTCTGTCTTTCGACACG	up	inf	inf	0.214901	0	3.59071	0	0	0	6.92446	3.84766	0	0	0	0	7	4	0	low
329	PC-3p-118350_47	ATGGGCTAATTTTGCCTCCCCTAG	down	0.503882	-0.988841	0.216231	5.80064	2.92284	3.71192	6.01951	7.6705	0	5.29053	3.478	3.5	6	8	0	5.5	3.5	low
330	PC-5p-63560_92	TTATACTATGTTTGGTCGGTG	down	0.747389	-0.420069	0.216394	8.77688	6.55975	11.1358	7.52439	7.6705	7.91367	4.80957	6.956	10.5	7.5	8	8	5	7	middle
331	PC-3p-4766_598	GTAATTTCACAAGTCGGATCTGGG	up	1.27805	0.353943	0.216968	108.135	138.202	127.266	121.393	75.7462	161.241	121.201	132.164	120	121	79	163	126	133	middle
332	stu-MIR7985-p3_2ss17TC18CT	GCCTTCTGGGTCGAGCCTGTCGCA	up	1.90629	0.930771	0.217124	1.80226	3.43564	0	3.00975	2.39703	3.46223	3.3667	3.478	0	3	2.5	3.5	3.5	3.5	low
333	PC-3p-280253_14	CATGGGAGCGACAACGAAATTC	down	-inf	-inf	0.219322	4.60778	0	0	9.02926	4.79406	0	0	0	0	9	5	0	0	0	low
334	PC-3p-79210_74	ATCCCAGTTCCAAGCAGCACTACC	up	1.35874	0.442271	0.219583	6.39348	8.68709	7.95412	4.51463	6.71169	10.8813	6.7334	8.44657	7.5	4.5	7	11	7	8.5	middle
335	PC-5p-145629_37	TTACACAATCAGGTCACTTAAAAT	up	2.77653	1.47328	0.220542	1.59802	4.43695	0	0	4.79406	5.44065	2.40479	5.46543	0	0	5	5.5	2.5	5.5	low
336	hbr-MIR6173-p3_1ss4CT	CAGTGCTGTAGCTAACGCGTT	down	0.532997	-0.9078	0.221667	121.057	64.5232	181.884	109.856	71.4315	99.91	37.5147	56.1448	171.5	109.5	74.5	101	39	56.5	middle
337	mtr-miR159a_L+1R-1	CTTTGGATTGAAGGGAGCTCT	down	-inf	-inf	0.222455	3.29233	0	0	6.52114	3.35584	0	0	0	0	6.5	3.5	0	0	0	low
338	hbr-MIR6173-p3_2ss16GA18AT	AAAGCTAGGGGAGCGAAT	down	0.258995	-1.949	0.222919	14.3601	3.71918	26.5137	6.01951	10.5469	3.46223	7.69532	0	25	6	11	3.5	8	0	middle
339	stu-miR156h-3p_L+1_1ss6AG	TGCTCGCTGCTCTATCTGTCACC	up	2.16884	1.11693	0.22471	7.57759	16.4346	5.83302	13.5439	3.35584	7.91367	25.4907	15.8994	5.5	13.5	3.5	8	26.5	16	middle
340	nta-miR396b	TTCCACAGCTTTCTTGAACTT	down	0.849828	-0.234756	0.225694	21018	17861.7	22544.1	18008.5	22501.4	17772.6	20694.3	15118.2	21257	17950.2	23468	17966.5	21513.7	15213.8	high
341	eun-MIR530-p5_2ss3AT17CA	GATGAAGAACGTAGCGAA	down	-inf	-inf	0.226335	8.00205	0	7.95412	16.052	0	0	0	0	7.5	16	0	0	0	0	middle
342	sly-miR396a-5p_1ss21GA	TTCCACAGCTTTCTTGAACTA	up	1.19367	0.255401	0.22653	49.1483	58.6668	55.1486	38.1236	54.1729	59.8471	63.4864	52.6668	52	38	56.5	60.5	66	53	middle
343	PC-5p-172726_29	ACTTGAGCTGCTTCTTGCTGGATC	up	2.69215	1.42876	0.226856	2.55683	6.88339	0	0	7.6705	5.93525	5.77149	8.94342	0	0	8	6	6	9	low
344	PC-3p-608282_5	AAAAAGAGGCCTCACACGACTAGT	up	inf	inf	0.228794	0	2.45779	0	0	0	0	2.40479	4.96857	0	0	0	0	2.5	5	low
345	gma-MIR4995-p3_2ss14GC19TC_2	TTGGTTAAGGGAACCCACCGGAGC	down	0.572511	-0.804625	0.22893	84.0311	48.1087	114.539	85.778	51.7759	83.0935	26.4527	34.78	108	85.5	54	84	27.5	35	middle
346	gma-MIR4995-p3_2ss14GC19TC_1	TTGGTTAAGGGAACCCACCGGA	down	0.572511	-0.804625	0.22893	84.0311	48.1087	114.539	85.778	51.7759	83.0935	26.4527	34.78	108	85.5	54	84	27.5	35	middle
347	PC-5p-77738_75	CTTCACGGCCTTAAATTCTTT	down	0.688184	-0.539133	0.229857	14.7342	10.1399	15.9082	11.0358	17.2586	14.8381	9.61915	5.96228	15	11	18	15	10	6	middle
348	nta-miR6149a	TTGATACGCACCTGAATCGGC	up	1.17918	0.237779	0.230333	107634	126920	100472	94452.6	127979	109268	135066	136425	94735.5	94146.5	133476	110460	140414	137288	high
349	gma-MIR4995-p3_1ss18GC_1	TGGCTTGGTTAAGGGAACCC	down	0.326964	-1.6128	0.230921	15.0458	4.91946	27.044	8.02601	10.0675	7.91367	3.3667	3.478	25.5	8	10.5	8	3.5	3.5	middle
350	gma-MIR4995-p3_1ss18GC_2	TGGCTTGGTTAAGGGAACCCAC	down	0.326964	-1.6128	0.230921	15.0458	4.91946	27.044	8.02601	10.0675	7.91367	3.3667	3.478	25.5	8	10.5	8	3.5	3.5	middle
351	PC-3p-27941_193	AAAAAAGCCTCACTCAACTTGTGT	up	1.50237	0.587239	0.2313	63.1603	94.8901	38.1798	82.2666	69.0345	97.9316	62.5245	124.214	36	82	72	99	65	125	middle
352	peu-MIR2916-p3_2ss11CT17GC	GATGTTGCTTTTAGGACTCCGCC	down	0.554881	-0.849751	0.231543	7062.09	3918.62	10244.9	7216.39	3724.99	5183.45	2826.11	3746.3	9660	7193	3885	5240	2938	3770	high
353	hbr-MIR6173-p5_2ss20AG21GC	AGATACCCCAGTAGTCCTAGCC	down	0.674904	-0.567246	0.231995	76.7232	51.7808	104.464	67.2179	58.4876	72.2122	40.4004	42.7297	98.5	67	61	73	42	43	middle
354	osa-miR162a_R+2	TCGATAAACCTCTGCATCCAGTT	up	1.17537	0.233114	0.232007	109.223	128.377	112.418	97.3154	117.934	150.36	112.544	122.227	106	97	123	152	117	123	middle
355	nta-MIR172i-p5	GTAGCATCATCAAGATTCACA	down	0.285834	-1.80675	0.232224	6.55814	1.87454	9.68635	9.02926	0.958813	0	4.23242	1.3912	9.13333	9	1	0	4.4	1.4	low
356	nta-MIR172c-p5	GTAGCATCATCAAGATTCACA	down	0.285834	-1.80675	0.232224	6.55814	1.87454	9.68635	9.02926	0.958813	0	4.23242	1.3912	9.13333	9	1	0	4.4	1.4	low
357	nta-MIR172h-p5	GTAGCATCATCAAGATTCACA	down	0.285834	-1.80675	0.232224	6.55814	1.87454	9.68635	9.02926	0.958813	0	4.23242	1.3912	9.13333	9	1	0	4.4	1.4	low
358	nta-MIR172f-p3	GTAGCATCATCAAGATTCACA	down	0.285834	-1.80675	0.232224	6.55814	1.87454	9.68635	9.02926	0.958813	0	4.23242	1.3912	9.13333	9	1	0	4.4	1.4	low
359	PC-5p-93928_61	AAATACAAGACGCTATACCTTAAC	down	0.516091	-0.954303	0.232575	13.2523	6.8394	9.54494	11.0358	19.1763	0	10.5811	9.93714	9	11	20	0	11	10	middle
360	gma-MIR4995-p5_2ss16GC21TC	GCTTGGTTAAGGGAACCCACC	down	0.571341	-0.807575	0.234182	8.8299	5.04488	13.2569	6.52114	6.71169	2.96762	7.69532	4.47171	12.5	6.5	7	3	8	4.5	middle
361	PC-3p-138545_39	TTTTTGGACAGTCTGAATAAC	down	0.542062	-0.883471	0.234592	8.4181	4.56313	10.6055	6.01951	8.62931	0	6.7334	6.956	10	6	9	0	7	7	middle
362	nta-MIR6145d-p3	CAGTGTTAGTGTAACAATCC	up	1.47964	0.565249	0.234645	56.1496	83.0813	24.3926	70.2276	73.8286	65.2877	86.5723	97.384	23	70	77	66	90	98	middle
363	nta-miR168a_R+1	TCGCTTGGTGCAGGTCGGGACC	up	1.10283	0.141214	0.234784	3993.26	4403.89	4075.41	4220.41	3683.95	4113.52	4223.06	4875.09	3842.73	4206.73	3842.2	4158.4	4390.27	4905.93	high
364	PC-3p-67703_86	TGCTAGAAAGAAACGCCCGTT	up	1.29066	0.368114	0.235625	12.3867	15.987	10.6055	15.0488	11.5058	13.8489	20.2002	13.912	10	15	12	14	21	14	middle
365	nta-MIR6145c-p5	ATTGTTATATGTTGCACTGGCC	up	1.18834	0.248944	0.235912	8092.88	9617.07	9070.88	7230.43	7977.32	7879.04	10916.8	10055.4	8553	7207	8320	7965	11349	10119	high
366	gma-miR394a-5p_L+3	AATTTGGCATTCTGTCCACCTCC	up	2.64663	1.40416	0.236651	5.81879	15.4002	7.42384	10.0325	0	5.93525	14.4287	25.8366	7	10	0	6	15	26	middle
367	hbr-miR6173_L+1R-1	TAGCCGTAAACGATGGATAC	down	0.460733	-1.118	0.237341	93.1172	42.9022	153.78	64.2081	61.364	53.9118	37.0337	37.7611	145	64	64	54.5	38.5	38	middle
368	PC-5p-359346_10	ACTGGAGTTCCGGTATACTTTGCT	up	inf	inf	0.238526	0	5.23029	0	0	0	10.8813	4.80957	0	0	0	0	11	5	0	middle
369	nta-miR169a_1ss7AG	CAGCCAGGGATGACTTGCCGA	up	1.66231	0.733193	0.240608	11.6304	19.3334	5.51486	10.0039	19.3726	18.1826	13.3683	26.4493	5.2	9.97143	20.2048	18.381	13.8976	26.6167	middle
370	nta-miR169b_1ss7AG	CAGCCAGGGATGACTTGCCGA	up	1.66231	0.733193	0.240608	11.6304	19.3334	5.51486	10.0039	19.3726	18.1826	13.3683	26.4493	5.2	9.97143	20.2048	18.381	13.8976	26.6167	middle
371	PC-5p-67778_86	TGTGAAGAGAACTCATTTGAT	down	0.596297	-0.745898	0.24084	8.98541	5.35797	12.1963	8.52764	6.23228	4.45144	9.13819	2.48428	11.5	8.5	6.5	4.5	9.5	2.5	middle
372	mdm-miR408b	ACAGGGAAGAGGTAGAGCATG	down	0.381352	-1.3908	0.241341	8.6465	3.29736	6.36329	9.02926	10.5469	9.89208	0	0	6	9	11	10	0	0	middle
373	sly-miR1919c-5p_R+3	TGTCGCAGATGACTTTCGCCCCTT	up	3.02701	1.5979	0.243844	2.55683	7.73957	0	0	7.6705	11.8705	2.40479	8.94342	0	0	8	12	2.5	9	middle
374	PC-3p-174363_29	ACATCCCTTGGTTGAATGTGGCTC	up	1.80593	0.852745	0.243996	3.43967	6.21181	5.30275	5.01626	0	4.94604	6.7334	6.956	5	5	0	5	7	7	low
375	ath-miR8175_L+3	TTCGATCCCCGGCAACGGCGCCA	up	1.3334	0.415113	0.244425	10.6626	14.2175	6.89357	14.5471	10.5469	14.3435	15.3906	12.9183	6.5	14.5	11	14.5	16	13	middle
376	PC-3p-94301_61	AATCCCAGCCCCTCATTCATC	up	1.84106	0.88054	0.244926	5.0907	9.37231	7.42384	4.01301	3.83525	13.3543	4.32862	10.434	7	4	4	13.5	4.5	10.5	middle
377	nta-MIR169s-p5	TATCGGCAGGTCGTCCTTGGC	up	1.82257	0.865975	0.245449	6.04249	11.0129	8.13088	2.0065	7.99011	15.4976	5.45085	12.0902	7.66667	2	8.33333	15.6667	5.66667	12.1667	middle
378	nta-MIR169d-p3	TATCGGCAGGTCGTCCTTGGC	up	1.82257	0.865975	0.245449	6.04249	11.0129	8.13088	2.0065	7.99011	15.4976	5.45085	12.0902	7.66667	2	8.33333	15.6667	5.66667	12.1667	middle
379	nta-MIR169b-p5	TATCGGCAGGTCGTCCTTGGC	up	1.82257	0.865975	0.245449	6.04249	11.0129	8.13088	2.0065	7.99011	15.4976	5.45085	12.0902	7.66667	2	8.33333	15.6667	5.66667	12.1667	middle
380	nta-MIR169r-p3	TATCGGCAGGTCGTCCTTGGC	up	1.82257	0.865975	0.245449	6.04249	11.0129	8.13088	2.0065	7.99011	15.4976	5.45085	12.0902	7.66667	2	8.33333	15.6667	5.66667	12.1667	middle
381	PC-3p-43622_132	CGGGAGTCTTGGCTTGAGGA	up	1.61054	0.687543	0.245978	10.5238	16.949	3.71192	12.039	15.8204	13.8489	23.086	13.912	3.5	12	16.5	14	24	14	middle
382	bdi-MIR7756-p5_2ss15AC20AT	TTGGAGATGTTGGCCTTGATT	down	-inf	-inf	0.246532	2.74335	0	5.83302	0	2.39703	0	0	0	5.5	0	2.5	0	0	0	low
383	bra-MIR171a-p5_2ss5AG21CG	AGATGTTGGTGTGGTTCAATG	up	1.45741	0.543404	0.249093	9.95142	14.5033	7.42384	8.52764	13.9028	12.8597	19.7193	10.9309	7	8.5	14.5	13	20.5	11	middle
384	csi-miR160c-5p_R-1_1ss19CT	TGCCTGGCTCCCTGTATGTT	up	6.68298	2.74049	0.249531	0.799011	5.33977	0	0	2.39703	2.47302	11.062	2.48428	0	0	2.5	2.5	11.5	2.5	middle
385	PC-5p-28155_192	TGAAGAGAATGAAGCCTCGTG	down	0.715543	-0.482889	0.250012	38.866	27.8103	30.7559	33.1073	52.7347	24.7302	27.8955	30.8051	29	33	55	25	29	31	middle
386	PC-5p-155318_34	AAATTTCATAGCTTGAGGTATTGT	down	0.375739	-1.4122	0.251463	5.12012	1.92383	2.65137	5.51788	7.19109	0	5.77149	0	2.5	5.5	7.5	0	6	0	low
387	sly-miR396a-3p_L-1_1ss12CT	TTCAATAAAGTTGTGGGAAG	down	0.81268	-0.299241	0.251521	175.898	142.949	165.976	211.184	150.534	131.07	175.549	122.227	156.5	210.5	157	132.5	182.5	123	middle
388	PC-3p-34_72315	TTTGTCTTTCCGATACCTCCCA	up	1.1134	0.154976	0.252663	6187.03	6888.67	5649.01	6304.43	6607.66	7312.72	6034.57	7318.7	5326.5	6284	6891.5	7392.5	6273.5	7365	high
389	nta-miR5303a	AAAATGTGGCCGGATACGTGT	up	1.25479	0.327442	0.254206	148.468	186.295	129.387	153.497	162.519	234.442	165.449	158.994	122	153	169.5	237	172	160	middle
390	aly-miR170-5p_R+2	TATTGGCCTGGTTCACTCAGATT	up	1.50752	0.592173	0.254247	23.1562	34.9083	18.0293	14.0455	37.3937	30.6655	44.2481	29.8114	17	14	39	31	46	30	middle
391	gma-miR4995_L+2R+1	ATAGGCAGTGGCTTGGTTAAGGGA	down	0.592076	-0.756146	0.254572	197.395	116.873	285.818	184.598	121.769	187.455	69.2579	93.906	269.5	184	127	189.5	72	94.5	middle
392	PC-3p-205807_23	AAAGGTGGATCCAGAATTCAAACT	up	4.57861	2.19491	0.255764	2.55683	11.7067	0	0	7.6705	17.8057	17.3145	0	0	0	8	18	18	0	middle
393	PC-5p-73596_79	AAAGAATGGGAGCCGTAGGATT	up	1.36912	0.453252	0.256228	5.48104	7.50422	3.71192	6.01951	6.71169	5.44065	9.61915	7.45285	3.5	6	7	5.5	10	7.5	low
394	PC-3p-150760_35	AAGTTCGATCCGGAGAGAAGAGGG	down	0.392098	-1.35071	0.257546	8.40953	3.29736	8.48439	10.0325	6.71169	9.89208	0	0	8	10	7	10	0	0	middle
395	PC-3p-160_14988	CGGGAGTCTTGGCTTGAGGG	up	1.37797	0.462546	0.257782	1272.47	1753.42	760.414	1229.48	1827.5	1855.75	1727.12	1677.39	717	1225.5	1906	1876	1795.5	1688	high
396	PC-3p-48849_119	AAAAAGAGGCCTCACACAACTAGT	down	0.679283	-0.557915	0.258132	29.6551	20.1442	18.0293	32.104	38.8319	16.8165	18.2764	25.3397	17	32	40.5	17	19	25.5	middle
397	rgl-miR7972_R+1_1ss14TG	TTGTCAGGCTTGTGATTCTCCA	down	-inf	-inf	0.258874	5.25986	0	4.2422	11.5374	0	0	0	0	4	11.5	0	0	0	0	middle
398	PC-3p-75_39076	CTGTGGTCGTGAAGCACTGAC	down	0.781055	-0.356503	0.259181	7383.76	5767.12	8931.94	7515.36	5703.98	4187.32	6672.8	6441.25	8422	7491	5949	4233	6937	6482	high
399	stu-MIR7997a-p5_2ss11CT19TG	TCAAAAATGCTGTTGGGTGCGTGT	down	-inf	-inf	0.260044	3.1339	0	6.89357	2.50813	0	0	0	0	6.5	2.5	0	0	0	0	low
400	hbr-MIR6173-p3_1ss3CT_1	AGTGCTGTAGCTAACGCGT	down	0.567598	-0.817059	0.260512	49.9229	28.3361	76.3595	44.6447	28.7644	40.5575	23.086	21.3648	72	44.5	30	41	24	21.5	middle
401	hbr-MIR6173-p3_1ss3CT_2	AGTGCTGTAGCTAACGCGTT	down	0.567598	-0.817059	0.260512	49.9229	28.3361	76.3595	44.6447	28.7644	40.5575	23.086	21.3648	72	44.5	30	41	24	21.5	middle
402	hbr-MIR6173-p3_1ss3CT_3	AGTGCTGTAGCTAACGCGTTA	down	0.567598	-0.817059	0.260512	49.9229	28.3361	76.3595	44.6447	28.7644	40.5575	23.086	21.3648	72	44.5	30	41	24	21.5	middle
403	PC-5p-210139_22	TTGGCCCTCGATCCGAATGAA	down	0.394262	-1.34277	0.260617	3.65968	1.44287	2.65137	4.01301	4.31466	0	4.32862	0	2.5	4	4.5	0	4.5	0	low
404	gma-miR4995_L+2	ATAGGCAGTGGCTTGGTTAAGGG	down	0.553493	-0.853364	0.262003	87.9837	48.6983	135.75	80.2601	47.9406	68.2554	35.1099	42.7297	128	80	50	69	36.5	43	middle
405	PC-3p-233716_19	AAACTGAAATCAAACCAACCCGAC	up	2.55029	1.35066	0.262506	3.19604	8.15083	0	0	9.58813	8.90287	10.5811	4.96857	0	0	10	9	11	5	middle
406	gma-miR156a_R+1	TGACAGAAGAGAGTGAGCACT	up	1.61936	0.695424	0.262778	26.9338	43.6155	31.8165	23.5764	25.4085	32.6439	65.4102	32.7926	30	23.5	26.5	33	68	33	middle
407	gma-miR5368_L+6	GCCAAGGGACAGTCTCAGGTAGACA	down	0.484437	-1.04562	0.263121	15.8998	7.70247	25.9835	14.0455	7.6705	11.8705	5.77149	5.46543	24.5	14	8	12	6	5.5	middle
408	ptc-miR159a_1ss21AT	TTTGGATTGAAGGGAGCTCTT	down	0.847594	-0.238555	0.263547	1424.19	1207.13	1678.85	1290.68	1303.03	1358.68	1261.55	1001.17	1583	1286.5	1359	1373.5	1311.5	1007.5	high
409	hbr-MIR6173-p3_2ss19GA20CG	CCGTAAACGATGGATACTAG	down	0.398864	-1.32603	0.267812	3.7201	1.48381	4.77247	3.51138	2.87644	4.45144	0	0	4.5	3.5	3	4.5	0	0	low
410	PC-5p-151109_35	TTGAACAATTGGCAGTGCATC	up	2.88024	1.52619	0.268619	5.11367	14.7286	0	0	15.341	4.94604	15.3906	23.8491	0	0	16	5	16	24	middle
411	ppe-miR858_L+1	TCTCGTTGTCTGTTCGACCTTG	up	1.93415	0.951702	0.269748	2.03632	3.93855	3.71192	0	2.39703	2.96762	2.88574	5.96228	3.5	0	2.5	3	3	6	low
412	PC-3p-281140_14	AGCTCTAGAGCTGAAGTCTGAGGC	up	inf	inf	0.270201	0	6.61725	0	0	0	4.94604	0	14.9057	0	0	0	5	0	15	middle
413	gma-miR6300_R+6_2	GTCGTTGTAGTATAGTGGTGAGTA	down	0.678329	-0.559942	0.271176	8.43175	5.71951	8.48439	11.5374	5.27347	5.44065	6.25245	5.46543	8	11.5	5.5	5.5	6.5	5.5	middle
414	gma-miR6300_R+6_1	GTCGTTGTAGTATAGTGGTAAGTA	down	0.678329	-0.559942	0.271176	8.43175	5.71951	8.48439	11.5374	5.27347	5.44065	6.25245	5.46543	8	11.5	5.5	5.5	6.5	5.5	middle
415	PC-3p-51584_113	ATAATTTCACTAGTGGGATCTGGG	up	1.61651	0.692885	0.271734	15.8033	25.5463	21.211	7.02276	19.1763	37.5899	21.1621	17.8868	20	7	20	38	22	18	middle
416	hbr-MIR6173-p5_2ss23AG24GC_1	ATTAGATACCCCAGTAGTCCTAGC	down	0.708479	-0.497204	0.272727	90.0833	63.8221	110.297	82.7683	77.1844	97.437	41.3623	52.6668	104	82.5	80.5	98.5	43	53	middle
417	PC-5p-126100_44	TTTATTGAAGCTGTTCGCAGT	down	0.81191	-0.300609	0.272734	4.0397	3.27987	4.77247	3.51138	3.83525	3.95683	2.40479	3.478	4.5	3.5	4	4	2.5	3.5	low
418	aof-miR5139a_L+2	TCGAAACCTGGCTCTGATACCA	up	inf	inf	0.272759	0	4.58446	0	0	0	10.3867	3.3667	0	0	0	0	10.5	3.5	0	middle
419	PC-3p-49154_118	AGGATTTGACGCGCCACAGTATT	up	1.45265	0.538689	0.273132	103.763	150.732	101.813	75.2439	134.234	212.68	119.277	120.239	96	75	140	215	124	121	middle
420	PC-5p-218998_21	TATTGATGCGACTCAATCTGA	up	inf	inf	0.273692	0	3.38945	0	0	0	2.47302	7.69532	0	0	0	0	2.5	8	0	low
421	nta-MIR396b-p3	TCCAAGAAAGCTGTGGGAAA	down	0.824342	-0.278685	0.273848	1137.63	937.8	1245.08	1210.92	956.895	721.133	1157.18	935.085	1174	1207	998	729	1203	941	middle
422	gra-MIR8666-p3_2ss15TC22AT	TTGTGCTCCTCGGTCATTTGAT	down	0.604471	-0.726256	0.274039	17.1225	10.35	10.0752	23.0748	18.2174	6.42985	6.7334	17.8868	9.5	23	19	6.5	7	18	middle
423	hbr-MIR6173-p3_2ss22AG23GC_1	TTAGATACCCCAGTAGTCCTAGC	down	0.695183	-0.524535	0.27421	118.718	82.531	158.022	111.361	86.7725	119.694	53.8672	74.0317	149	111	90.5	121	56	74.5	middle
424	hbr-MIR6173-p3_2ss22AG23GC_2	TTAGATACCCCAGTAGTCCTAGCC	down	0.695183	-0.524535	0.27421	118.718	82.531	158.022	111.361	86.7725	119.694	53.8672	74.0317	149	111	90.5	121	56	74.5	middle
425	sly-miR164b-3p	CACGTGTTCTCCTTCTCCAAC	up	1.26709	0.341514	0.274872	9.02126	11.4307	9.01467	7.02276	11.0263	12.8597	12.9858	8.44657	8.5	7	11.5	13	13.5	8.5	middle
426	gma-MIR9724-p5_2ss16AC21TA	ACAATCCTCACCTCACAAGCAAGC	up	1.73886	0.798141	0.276007	2.35592	4.09662	3.71192	0	3.35584	4.45144	3.3667	4.47171	3.5	0	3.5	4.5	3.5	4.5	low
427	gma-miR172k	TGAATCTTGATGATGCTGCAT	down	0.796417	-0.328405	0.276685	239.995	191.136	245.517	213.191	261.276	127.608	206.812	238.988	231.5	212.5	272.5	129	215	240.5	middle
428	PC-3p-207224_23	AGTTTTACCCGTGGGACAAGCGAG	up	3.8896	1.95962	0.278541	2.0065	7.80449	0	6.01951	0	11.8705	11.543	0	0	6	0	12	12	0	middle
429	hbr-MIR6173-p3_1ss23AG	ATTAGATACCCCAGTAGTCCTAG	down	0.569607	-0.811962	0.280874	11.171	6.36308	16.9688	5.51788	11.0263	7.41906	7.69532	3.97486	16	5.5	11.5	7.5	8	4	middle
430	osa-MIR5083-p3_1ss20GA	AATGGATCCTTCTGAGCCTA	down	0.591706	-0.757048	0.282325	215.773	127.674	205.747	325.555	116.016	142.941	132.263	107.818	194	324.5	121	144.5	137.5	108.5	middle
431	PC-3p-91084_63	ACTGTCATTAGTTGTGTGAGACCT	down	0.81642	-0.292617	0.284856	18.8279	15.3715	21.211	17.0553	18.2174	10.8813	16.3525	18.8806	20	17	19	11	17	19	middle
432	stu-miR3627-5p_1ss5AT	TCGCTGGAGAGATGGCACTTAG	up	3.89504	1.96164	0.284997	0.836043	3.25642	0	2.50813	0	5.44065	4.32862	0	0	2.5	0	5.5	4.5	0	low
433	gma-miR6300_R+1	GTCGTTGTAGTATAGTGGT	down	0.674255	-0.568634	0.285769	16.5269	11.1434	16.4385	23.0748	10.0675	11.8705	9.13819	12.4214	15.5	23	10.5	12	9.5	12.5	middle
434	stu-MIR5303j-p5_2ss10GT17CT	ATTCAAATTTCTGCCCTA	down	0.249174	-2.00477	0.286265	3.96994	0.989208	6.89357	5.01626	0	2.96762	0	0	6.5	5	0	3	0	0	low
435	ptc-miR167e_1ss21GT	TGAAGCTGCCAGCATGATCTT	down	0.875475	-0.191862	0.287224	373.611	327.087	396.645	331.073	393.113	364.029	266.45	350.781	374	330	410	368	277	353	middle
436	PC-3p-115002_49	ATTGAACTCGGAAAGCATATGGAC	up	1.82943	0.871393	0.288475	6.27595	11.4814	6.36329	0	12.4646	10.8813	8.65723	14.9057	6	0	13	11	9	15	middle
437	nta-MIR6158a-p3	TTACTTTGGCCAGAGTTTGAGC	down	0.84772	-0.23834	0.289186	98.3717	83.3917	85.3742	102.833	106.908	74.6852	72.1436	103.346	80.5	102.5	111.5	75.5	75	104	middle
438	PC-3p-143682_37	AAACGAGGCATACATGGCATGAAG	up	1.85655	0.892622	0.290257	4.24373	7.87869	0	6.01951	6.71169	11.8705	4.80957	6.956	0	6	7	12	5	7	middle
439	gma-miR5368_L+2R+2	AGGGACAGTCTCAGGTAGACAGT	down	0.479919	-1.05914	0.29049	35.3662	16.9729	54.6183	36.6187	14.8616	35.6115	2.88574	12.4214	51.5	36.5	15.5	36	3	12.5	middle
440	stu-MIR6022-p5	AAACCTTATGAACCTAACGCGACT	down	0.869491	-0.201757	0.290907	270.001	234.764	292.712	270.878	246.415	201.798	220.278	282.215	276	270	257	204	229	284	middle
441	nta-miR6025e	TGCCAATTATAGAGATGACATC	up	4.4673	2.1594	0.291537	1.59802	7.13884	0	0	4.79406	0	13.4668	7.94971	0	0	5	0	14	8	middle
442	PC-5p-224408_20	TTTGGATTGGATGCTCAGATT	down	0.252741	-1.98427	0.294263	7.86349	1.98743	9.54494	14.0455	0	0	0	5.96228	9	14	0	0	0	6	middle
443	stu-miR8036-3p_1ss2AT	TTTGTCTTTCCGATGCCTCCCA	up	1.10772	0.147593	0.295366	2237.71	2478.76	1961.49	2310.99	2440.66	2629.32	2198.46	2608.5	1849.5	2303.5	2545.5	2658	2285.5	2625	high
444	PC-3p-169422_30	ATCTTATCGGTTCGCTTATCGGTT	up	2.3925	1.25852	0.296751	2.87644	6.88189	0	0	8.62931	6.92446	5.77149	7.94971	0	0	9	7	6	8	low
445	ath-miR8175_L+3_1ss5AG	TTCGGTCCCCGGCAACGGCGCCA	down	0.589268	-0.763003	0.296756	3.86294	2.27631	4.2422	3.51138	3.83525	3.46223	3.3667	0	4	3.5	4	3.5	3.5	0	low
446	PC-5p-108976_52	ATGGACTCGGGATAGTTTTGG	up	1.5712	0.651864	0.297293	10.7719	16.9248	13.7871	7.02276	11.5058	15.8273	25.0098	9.93714	13	7	12	16	26	10	middle
447	PC-5p-34171_164	TTTGATGGTTCTGAATCTATA	down	0.836699	-0.257219	0.297481	37.1265	31.0637	38.1798	29.0943	44.1054	32.1493	32.2241	28.8177	36	29	46	32.5	33.5	29	middle
448	PC-3p-120816_46	AAGATTGTGCCAACTTTAGGTGTC	up	1.83089	0.872548	0.297695	7.90169	14.4671	11.666	12.039	0	14.8381	7.69532	20.868	11	12	0	15	8	21	middle
449	ptc-MIR168b-p3	TGGATCCCGCCTTGCATCAAC	up	1.82523	0.868081	0.298039	4.67698	8.53657	9.01467	5.01626	0	7.91367	5.77149	11.9246	8.5	5	0	8	6	12	middle
450	ppe-miR159_L+1	GTTTGGATTGAAGGGAGCTCTA	down	0.708875	-0.496396	0.300469	13.4047	9.50229	10.6055	19.0618	10.5469	8.90287	8.17627	11.4277	10	19	11	9	8.5	11.5	middle
451	ath-miR170-5p_R+1	TATTGGCCTGGTTCACTCAGAT	up	1.82267	0.866055	0.303691	5.26725	9.60047	3.18165	3.51138	9.10872	4.45144	14.9097	9.44028	3	3.5	9.5	4.5	15.5	9.5	middle
452	PC-5p-294394_13	AGATGATGTTCTTGGAGCTTTCCC	down	0.280662	-1.83309	0.303905	2.9505	0.828095	0	5.01626	3.83525	0	0	2.48428	0	5	4	0	0	2.5	low
453	PC-5p-161258_32	CATCGAAGGGGCGTAAGGGATTG	down	0.403748	-1.30847	0.304133	6.97346	2.81552	9.01467	9.02926	2.87644	0	0	8.44657	8.5	9	3	0	0	8.5	low
454	nta-MIR6162-p3	CAAGGGCTTCCATTTTTCTGA	down	0.845546	-0.242044	0.306208	108.62	91.8435	88.0256	109.354	128.481	100.899	98.1153	76.516	83	109	134	102	102	77	middle
455	gma-miR5368_L+3R+2	AAGGGACAGTCTCAGGTAGACAGT	down	0.436473	-1.19604	0.307188	30.6218	13.3656	51.9669	24.078	15.8204	32.6439	0	7.45285	49	24	16.5	33	0	7.5	middle
456	nta-miR168d	TCGCTTGGTGCAGGTCGGGAA	up	1.12845	0.174338	0.30735	2063.4	2328.43	2218.03	1714.21	2257.96	2093.56	2307.49	2584.25	2091.4	1708.65	2354.95	2116.4	2398.85	2600.6	high
457	PC-3p-60854_96	TCCATCTGTCCCTAAATCGTT	up	1.31328	0.393177	0.307572	14.9819	19.6755	17.4991	13.5439	13.9028	26.214	14.4287	18.3837	16.5	13.5	14.5	26.5	15	18.5	middle
458	bra-miR156b-3p_L+1	TGCTCACTCTCTATCTGTCACC	up	1.46595	0.551837	0.30759	61.9785	90.8575	53.0275	63.8737	69.0345	62.6499	132.744	77.1784	50	63.6667	72	63.3333	138	77.6667	middle
459	nta-MIR156f-p3	TGCTCACTCTCTATCTGTCACC	up	1.46595	0.551837	0.30759	61.9785	90.8575	53.0275	63.8737	69.0345	62.6499	132.744	77.1784	50	63.6667	72	63.3333	138	77.6667	middle
460	nta-MIR156b-p3	TGCTCACTCTCTATCTGTCACC	up	1.46595	0.551837	0.30759	61.9785	90.8575	53.0275	63.8737	69.0345	62.6499	132.744	77.1784	50	63.6667	72	63.3333	138	77.6667	middle
461	hbr-MIR6173-p5_2ss23AG24GC_2	ATTAGATACCCCAGTAGTCCTAGCC	down	0.737494	-0.439296	0.30947	147.813	109.011	185.596	138.95	118.893	161.736	79.8389	85.4594	175	138.5	124	163.5	83	86	middle
462	hbr-MIR6173-p3_2ss23AG24GC	ATTAGATACCCCAGTAGTCCTAGCC	down	0.737494	-0.439296	0.30947	147.813	109.011	185.596	138.95	118.893	161.736	79.8389	85.4594	175	138.5	124	163.5	83	86	middle
463	nta-MIR5303c-p3_2ss19TA23TC	ATCCGACACGGGTGCGGCAACACT	up	1.25587	0.32869	0.310251	165.07	207.307	102.873	188.11	204.227	209.712	215.95	196.258	97	187.5	213	212	224.5	197.5	middle
464	nta-MIR5303a-p3_2ss19TA23TC	ATCCGACACGGGTGCGGCAACACT	up	1.25587	0.32869	0.310251	165.07	207.307	102.873	188.11	204.227	209.712	215.95	196.258	97	187.5	213	212	224.5	197.5	middle
465	PC-3p-79769_73	TTGAGCGGAAAGAATACAAAC	down	0.638756	-0.646662	0.311115	7.36282	4.70305	6.89357	7.52439	7.6705	2.96762	8.65723	2.48428	6.5	7.5	8	3	9	2.5	low
466	PC-5p-436885_7	AGGCCCAGAGTGGACAGTATCACT	down	0.275555	-1.85959	0.314271	4.07264	1.12223	7.42384	0	4.79406	0	3.3667	0	7	0	5	0	3.5	0	low
467	PC-3p-61497_95	GAAGAACATGATGCTGACGGGCCA	up	1.22258	0.289931	0.314434	15.0028	18.3421	10.6055	19.0618	15.341	17.8057	16.3525	20.868	10	19	16	18	17	21	middle
468	lja-MIR11069-p3_2ss7TG18AT	TAAGGTGTTGGGTTAAGT	down	0.302283	-1.72603	0.314643	3.27246	0.989208	5.30275	4.51463	0	2.96762	0	0	5	4.5	0	3	0	0	low
469	lja-MIR11069-p5_2ss7TG18AT	TAAGGTGTTGGGTTAAGT	down	0.302283	-1.72603	0.314643	3.27246	0.989208	5.30275	4.51463	0	2.96762	0	0	5	4.5	0	3	0	0	low
470	PC-5p-2824_793	TTATTGTCGATTATACCAACA	down	0.606687	-0.720976	0.315669	81.9591	49.7235	72.1173	123.902	49.8583	25.7194	83.2056	40.2454	68	123.5	52	26	86.5	40.5	middle
471	nta-miR399a	CGCCAAAGGAGAGCTGCCCTG	up	3.24882	1.69991	0.315986	0.286643	0.931252	0	0.85993	0	0	1.37416	1.41959	0	0.857143	0	0	1.42857	1.42857	low
472	PC-5p-44848_129	TTCATTCCTTGGCAGTTTACAT	up	1.24391	0.314879	0.317426	18.9503	23.5724	12.7266	22.0715	22.0527	28.687	21.1621	20.868	12	22	23	29	22	21	middle
473	ptc-miR6478_R+1_1ss21GA	CCGACCTTAGCTCAGTTGGTAG	down	0.373304	-1.42158	0.318459	9.59423	3.58156	18.5596	3.51138	6.71169	2.47302	5.29053	2.98114	17.5	3.5	7	2.5	5.5	3	middle
474	PC-5p-333329_11	AACTGATGCTAGTTGTGTGAGGCC	up	2.31392	1.21034	0.319325	2.1211	4.90806	6.36329	0	0	4.94604	4.80957	4.96857	6	0	0	5	5	5	low
475	PC-3p-4783_596	AAAAAAGGAATATGGACTGGTACT	down	0.914129	-0.129531	0.320315	84.7565	77.4783	77.9504	84.2731	92.046	67.7608	83.6866	80.9877	73.5	84	96	68.5	87	81.5	middle
476	mdm-MIR166e-p5	ATGTTGTCTGGTTCGAGATCT	down	0.540177	-0.888496	0.321151	11.4154	6.16632	14.8477	5.01626	14.3822	0	11.543	6.956	14	5	15	0	12	7	middle
477	PC-5p-41846_137	TTGCTCGTGTTGGATGTAAGTGATC	up	1.24723	0.318733	0.32285	45.6549	56.9424	56.2091	48.1561	32.5996	44.5144	56.753	69.56	53	48	34	45	59	70	middle
478	gma-MIR10423-p3_1ss3AC	CTCTCAATGAAAGCACCA	up	2.40447	1.26572	0.325562	1.75782	4.22664	0	0	5.27347	3.46223	6.7334	2.48428	0	0	5.5	3.5	7	2.5	low
479	gma-MIR10423-p5_1ss3AC	CTCTCAATGAAAGCACCA	up	2.40447	1.26572	0.325562	1.75782	4.22664	0	0	5.27347	3.46223	6.7334	2.48428	0	0	5.5	3.5	7	2.5	low
480	PC-5p-36594_154	TGCAATTAGGTACTGTCTTTGCT	up	1.21982	0.286667	0.326457	94.0533	114.728	71.0568	90.2926	120.81	123.651	92.3438	128.189	67	90	126	125	96	129	middle
481	nta-MIR6164a-p3_2ss6TC21TC	AAACTCCGTGCCCAGTCAAACAGG	up	1.29048	0.367905	0.331527	2207.85	2849.18	1886.19	2453.95	2283.41	3281.2	1843.99	3422.35	1778.5	2446	2381.5	3317	1917	3444	high
482	nta-MIR6164b-p3_2ss21TC22GA	AAACTCCGTGCCCAGTCAAACAGG	up	1.29048	0.367905	0.331527	2207.85	2849.18	1886.19	2453.95	2283.41	3281.2	1843.99	3422.35	1778.5	2446	2381.5	3317	1917	3444	high
483	nta-miR172c	AGAATCTTGATGATGCTGCAT	down	0.861622	-0.214872	0.331848	157.07	135.335	170.95	155.456	144.804	104.197	162.357	139.451	161.19	154.952	151.024	105.333	168.786	140.333	middle
484	nta-miR172d	AGAATCTTGATGATGCTGCAT	down	0.861622	-0.214872	0.331848	157.07	135.335	170.95	155.456	144.804	104.197	162.357	139.451	161.19	154.952	151.024	105.333	168.786	140.333	middle
485	PC-3p-166312_31	TTTCTTCCAAAACTTAGTGCCC	up	2.36076	1.23925	0.332103	2.07743	4.90431	0	0	6.23228	7.41906	4.80957	2.48428	0	0	6.5	7.5	5	2.5	low
486	osa-miR171a	TGATTGAGCCGCGCCAATATC	up	1.21948	0.286265	0.334681	6.18593	7.54361	5.30275	7.02276	6.23228	7.41906	5.77149	9.44028	5	7	6.5	7.5	6	9.5	low
487	nta-miR396a	TTCCACAGCTTTCTTGAACTG	up	1.44947	0.535523	0.33548	29094	42170.8	25684.4	21364.9	40232.7	30486.4	33890.8	62135.3	24218	21295.7	41961	30819	35232.7	62528.3	high
488	osa-MIR2118e-p3_2ss13TA19CT	GAAAAGAGAGTCAAAGAGT	down	0.461176	-1.11661	0.335799	12.0347	5.55013	21.211	11.5374	3.35584	7.91367	6.25245	2.48428	20	11.5	3.5	8	6.5	2.5	middle
489	PC-5p-3651_689	TTGTGATATGGAGCACTAGCCA	down	0.867093	-0.205742	0.337338	61.1605	53.0318	67.8751	55.6805	59.9258	48.4712	65.4102	45.214	64	55.5	62.5	49	68	45.5	middle
490	nta-MIR156g-p3	TCATTTGTGCTCTCTATGCTTC	up	1.09058	0.125092	0.33774	73.3467	79.9902	68.5822	78.588	72.8698	90.0179	73.1055	76.8472	64.6667	78.3333	76	91	76	77.3333	middle
491	PC-5p-340912_11	AGGACTGCGTACATACTATTCTCC	up	3.51342	1.81288	0.338488	1.59802	5.61452	0	0	4.79406	10.8813	0	5.96228	0	0	5	11	0	6	middle
492	nta-miR169t_R-1_1ss8GT	TAGCCAATGATGACTTGCCT	up	2.42774	1.27962	0.33941	4.47446	10.8628	0	0	13.4234	9.89208	4.80957	17.8868	0	0	14	10	5	18	middle
493	nta-MIR6164a-p5_1ss21AG	TTTTTAGTCCGTGCCAAAAAGAAT	up	1.19853	0.261272	0.344297	394.228	472.496	294.302	379.731	508.65	504.002	503.081	410.404	277.5	378.5	530.5	509.5	523	413	middle
494	PC-3p-116117_48	TGGGCTGTCCTTTTTACACCA	up	1.25778	0.330885	0.345198	31.2594	39.3176	39.2403	19.0618	35.4761	46.4928	32.7051	38.7548	37	19	37	47	34	39	middle
495	cas-MIR5139-p3_2ss10AG18TC	GAAACTCTGGTGGAGGCC	down	0.498731	-1.00367	0.34571	8.61904	4.29858	7.95412	14.5471	3.35584	4.94604	0	7.94971	7.5	14.5	3.5	5	0	8	middle
496	ptc-miR159a_1ss21AG	TTTGGATTGAAGGGAGCTCTG	down	0.858887	-0.21946	0.347169	64.8568	55.7046	60.9816	61.1983	72.3904	64.7931	61.0816	41.2391	57.5	61	75.5	65.5	63.5	41.5	middle
497	PC-5p-181143_27	ACCAAATAAGGCGTCCCGTGCAAT	up	3.23945	1.69575	0.347198	2.1211	6.8712	6.36329	0	0	0	7.69532	12.9183	6	0	0	0	8	13	middle
498	PC-5p-30359_181	TTTGTATGCCCCATCCGAGTT	down	0.818517	-0.288916	0.349209	74.9085	61.3139	63.6329	65.2114	95.8813	64.2985	48.0957	71.5474	60	65	100	65	50	72	middle
499	gma-miR6300_R+5_2	GTCGTTGTAGTATAGTGGTGAGT	down	0.462327	-1.11301	0.350145	56.4167	26.083	36.0587	106.345	26.8468	29.6762	33.667	14.9057	34	106	28	30	35	15	middle
500	gma-miR6300_R+5_1	GTCGTTGTAGTATAGTGGTAAGT	down	0.462327	-1.11301	0.350145	56.4167	26.083	36.0587	106.345	26.8468	29.6762	33.667	14.9057	34	106	28	30	35	15	middle
501	nta-MIR6145b-p3	CAGTGCTCGTGTAATAATAAC	up	1.27772	0.353568	0.350328	62.5301	79.8957	49.8458	79.2569	58.4876	60.3417	105.811	73.5348	47	79	61	61	110	74	middle
502	nta-miR171c	TGATTGAGCCGTGCCAATATC	up	1.2787	0.354675	0.350413	4301.14	5499.86	3959.03	4494.07	4450.33	4004.31	5115.94	7379.32	3733	4479.5	4641.5	4048	5318.5	7426	high
503	PC-3p-49097_118	TCCTAGAGTACGTAAAGCTCC	down	0.827542	-0.273096	0.350607	36.0882	29.8644	34.9981	30.5992	42.6672	33.1385	20.6812	35.7737	33	30.5	44.5	33.5	21.5	36	middle
504	mtr-MIR4414a-p5_2ss7CA18GA	CAGCTGATGACTCGTTGATTC	down	0.27665	-1.85387	0.354262	16.522	4.57082	0	15.0488	34.5173	8.90287	4.80957	0	0	15	36	9	5	0	middle
505	PC-3p-274674_14	TGCATGAATAAATATCAAGGA	down	0.340043	-1.55621	0.355047	7.54347	2.56511	0	13.0423	9.58813	0	7.69532	0	0	13	10	0	8	0	middle
506	nta-miR482d	TTCCCGACTCCCCCCATACCAC	up	1.18581	0.245869	0.356505	15822.8	18762.8	13531.5	15705.9	18230.9	22666.7	14481.6	19139.9	12759	15655	19014	22914	15055	19261	high
507	PC-5p-337209_11	ATAACTGACTCTAGTTGTATGAGA	up	4.83202	2.27263	0.356857	1.67209	8.07955	0	5.01626	0	0	18.2764	5.96228	0	5	0	0	19	6	middle
508	stu-miR8031_R-2_1ss7AG	TTAGACGCCTCAACTAAGACT	up	1.89474	0.921999	0.357092	6.05809	11.4785	9.54494	0	8.62931	19.7842	7.69532	6.956	9	0	9	20	8	7	middle
509	vvi-miR3630-3p_L-1_2ss2TA22CA	ATGGGAATCTCTCTGATGCAA	down	0.600652	-0.7354	0.359349	12.734	7.64868	14.8477	18.5602	4.79406	8.90287	11.062	2.98114	14	18.5	5	9	11.5	3	middle
510	PC-5p-43141_133	TAAATATTGGGCCTGCTCTAT	down	0.771744	-0.373805	0.359654	33.7546	26.05	34.9981	24.078	42.1878	36.6007	20.6812	20.868	33	24	44	37	21.5	21	middle
511	stu-miR162a-5p_L+1	TGGAGGCAGCGGTTCATCGATC	down	0.869689	-0.201429	0.363104	57.3772	49.9003	48.255	69.2244	54.6523	44.5144	49.5386	55.648	45.5	69	57	45	51.5	56	middle
512	nta-MIR162b-p5	TGGAGGCAGCGGTTCATCGATC	down	0.869689	-0.201429	0.363104	57.3772	49.9003	48.255	69.2244	54.6523	44.5144	49.5386	55.648	45.5	69	57	45	51.5	56	middle
513	nta-miR6025a	TACCAACAATTGAGATAACATC	up	1.20894	0.27374	0.363194	2257.24	2728.86	2226.09	2367.67	2177.94	1959.13	3326.3	2901.15	2099	2360	2271.5	1980.5	3458	2919.5	high
514	stu-miR391-3p_L+1	AGCATCATACTCCTGCATATT	down	0.359297	-1.47675	0.363458	4.46202	1.60319	6.36329	7.02276	0	0	4.80957	0	6	7	0	0	5	0	low
515	aqc-miR482a_2ss5GA20AG	TCTTACCGACTCCTCCCATGCC	up	1.23793	0.307924	0.365773	24.3316	30.1206	33.4073	17.0553	22.5321	26.7086	28.3765	35.2768	31.5	17	23.5	27	29.5	35.5	middle
516	nta-miR164c	TGGAGAAGCAGGGCACATGCT	down	0.694697	-0.525545	0.368356	27.4678	19.0818	22.2715	37.1203	23.0115	15.8273	9.61915	31.7988	21	37	24	16	10	32	middle
517	ath-miR8175_L+1_1ss3AG	CGGTCCCCGGCAACGGCGCCA	down	0.596666	-0.745004	0.368882	8.15852	4.86792	4.2422	13.0423	7.19109	3.46223	8.65723	2.48428	4	13	7.5	3.5	9	2.5	middle
518	nta-MIR479a-p3	TGAGCCGGACCAATATCACTC	down	0.704977	-0.504351	0.369012	156.736	110.495	123.024	110.358	236.827	97.9316	119.277	114.277	116	110	247	99	124	115	middle
519	nta-MIR156c-p3_1ss22TC	TGCTCACTTCTCTTGCTGTCACC	up	1.24422	0.315244	0.369587	3228.27	4016.69	3513.6	3405.04	2766.17	3388.04	3282.05	5379.97	3313	3394	2885	3425	3412	5414	high
520	nta-miR408	TGCACTGCCTCTTCCCTGGCT	down	0.758127	-0.399488	0.370092	1365.62	1035.31	1818.84	1425.62	852.384	793.345	1045.6	1266.99	1715	1421	889	802	1087	1275	high
521	stu-miR384-5p_L+1	ATTGGCATTCTGTCCACCTCC	up	1.21748	0.283895	0.370121	84.1302	102.427	82.1926	86.7813	83.4167	78.6421	132.744	95.8934	77.5	86.5	87	79.5	138	96.5	middle
522	gma-miR6300_R+3	GTCGTTGTAGTATAGTGGTGA	down	0.3432	-1.54288	0.370446	4.32346	1.48381	7.95412	5.01626	0	4.45144	0	0	7.5	5	0	4.5	0	0	low
523	mes-miR166i_L-1	TGGACCAGGCTTCATTCCCC	down	0.322527	-1.63251	0.371526	3.57823	1.15408	3.71192	7.02276	0	3.46223	0	0	3.5	7	0	3.5	0	0	low
524	PC-3p-180202_28	ATATTCGTTGCGCCTTTGAATACA	down	0.467657	-1.09648	0.37296	6.34573	2.96762	5.30275	7.02276	6.71169	8.90287	0	0	5	7	7	9	0	0	low
525	nta-miR6148a_L+1	CTACGTCGATCGATTGTTCTTA	down	0.369492	-1.43638	0.373535	4.46202	1.64868	6.36329	7.02276	0	4.94604	0	0	6	7	0	5	0	0	low
526	PC-3p-8846_423	TCATATACCTGGTCAAGGTGTT	up	1.85277	0.889686	0.374882	29.6916	55.0118	30.2256	40.6317	18.2174	27.2032	99.0772	38.7548	28.5	40.5	19	27.5	103	39	middle
527	PC-3p-295733_13	TTAAAAATGCTCTGGTGCTTT	down	0.282941	-1.82143	0.375839	5.82694	1.64868	0	5.01626	12.4646	4.94604	0	0	0	5	13	5	0	0	middle
528	stu-MIR8021-p3_2ss16GA23TG	AACTCGAGACCTCTGATTAAGAGA	down	0.360593	-1.47156	0.375913	2.29648	0.828095	0	4.01301	2.87644	0	0	2.48428	0	4	3	0	0	2.5	low
529	PC-5p-232986_19	ATGCGACCCGTAGACCTGTTCTGC	up	2.72267	1.44502	0.377477	1.67209	4.55253	0	5.01626	0	0	7.69532	5.96228	0	5	0	0	8	6	low
530	ptc-miR162a_R+1_2	TCGATAAACCTCTGCATCCAGT	up	1.2418	0.312432	0.37758	25.074	31.1369	23.8624	23.0748	28.285	30.1709	40.8814	22.3586	22.5	23	29.5	30.5	42.5	22.5	middle
531	PC-3p-54822_106	ACGTGGGCTGGACTGGGCTAACCC	down	0.664102	-0.590524	0.377624	21.3088	14.1512	26.5137	22.0715	15.341	25.7194	4.80957	11.9246	25	22	16	26	5	12	middle
532	cme-miR160a_L+2	AATGCCTGGCTCCCTGTATGCCA	up	1.34919	0.432095	0.377694	19.8025	26.7173	18.5596	13.0423	27.8056	20.2788	37.5147	22.3586	17.5	13	29	20.5	39	22.5	middle
533	osa-miR160e-5p_L+2_1ss23GA	AATGCCTGGCTCCCTGTATGCCA	up	1.34919	0.432095	0.377694	19.8025	26.7173	18.5596	13.0423	27.8056	20.2788	37.5147	22.3586	17.5	13	29	20.5	39	22.5	middle
534	csi-miR160c-5p_R-1	TGCCTGGCTCCCTGTATGCT	up	1.70859	0.77281	0.37891	23.0258	39.3418	14.3174	24.078	30.682	14.8381	64.9292	38.258	13.5	24	32	15	67.5	38.5	middle
535	PC-5p-229257_19	AGCCCGCATCCGAAACTATTTACA	up	2.73535	1.45172	0.379827	1.67209	4.57373	0	5.01626	0	0	5.77149	7.94971	0	5	0	0	6	8	low
536	gma-MIR6300-p5_2	ATAGTGGTAAGTATTCCCGCC	down	0.563606	-0.82724	0.380061	17.7467	10.0021	6.36329	30.0975	16.7792	6.92446	8.17627	14.9057	6	30	17.5	7	8.5	15	middle
537	gma-MIR6300-p3_3	GTATAGTGGTAAGTATTCCCGCC	down	0.563606	-0.82724	0.380061	17.7467	10.0021	6.36329	30.0975	16.7792	6.92446	8.17627	14.9057	6	30	17.5	7	8.5	15	middle
538	gma-MIR6300-p5_1	AGTATAGTGGTAAGTATTCCCGCC	down	0.563606	-0.82724	0.380061	17.7467	10.0021	6.36329	30.0975	16.7792	6.92446	8.17627	14.9057	6	30	17.5	7	8.5	15	middle
539	gma-MIR6300-p3_2	ATAGTGGTAAGTATTCCCGCC	down	0.563606	-0.82724	0.380061	17.7467	10.0021	6.36329	30.0975	16.7792	6.92446	8.17627	14.9057	6	30	17.5	7	8.5	15	middle
540	gma-MIR6300-p3_1	AGTATAGTGGTAAGTATTCCCGCC	down	0.563606	-0.82724	0.380061	17.7467	10.0021	6.36329	30.0975	16.7792	6.92446	8.17627	14.9057	6	30	17.5	7	8.5	15	middle
541	ptc-miR166a_1ss2CT	TTGGACCAGGCTTCATTCCCC	up	1.10967	0.150135	0.382876	218.691	242.676	191.959	260.845	203.268	259.173	230.86	237.994	181	260	212	262	240	239.5	middle
542	mes-miR166i	TTGGACCAGGCTTCATTCCCC	up	1.10967	0.150135	0.382876	218.691	242.676	191.959	260.845	203.268	259.173	230.86	237.994	181	260	212	262	240	239.5	middle
543	PC-5p-39029_146	TTCGTTCCCCATTTCTCCCATC	up	1.21744	0.28385	0.383347	17.2509	21.0019	18.0293	14.5471	19.1763	25.2248	14.4287	23.3523	17	14.5	20	25.5	15	23.5	middle
544	PC-3p-16921_281	ATCTGACACGTATCCGGCAACATT	up	1.21751	0.283933	0.383744	56.576	68.8818	45.6036	53.1723	70.9521	50.4496	84.6485	71.5474	43	53	74	51	88	72	middle
545	PC-5p-42211_136	ATGGCCATCAAACACATTATCTT	down	0.802105	-0.318137	0.383831	28.1814	22.6045	29.6954	26.0845	28.7644	32.6439	18.2764	16.8931	28	26	30	33	19	17	middle
546	fve-miR408_R+1_2ss19GT20CT	TGCACTGCCTCTTCCCTGTTTT	up	2.6176	1.38824	0.385218	1.76758	4.62682	5.30275	0	0	6.92446	0	6.956	5	0	0	7	0	7	low
547	PC-5p-13054_333	CATCGGCGTATGCACCACTGG	up	1.26076	0.334291	0.386454	89.4435	112.767	74.2384	74.2406	119.852	148.381	86.5723	103.346	70	74	125	150	90	104	middle
548	stu-miR477a-5p_1ss12AT	CCTCTCCCTCATGGGCTTCTC	up	6.19491	2.63108	0.386759	0.799011	4.9498	0	0	2.39703	12.3651	0	2.48428	0	0	2.5	12.5	0	2.5	middle
549	cme-miR171b_1ss19AT	TTGAGCCGTGCCAATATCTCG	up	1.18453	0.244319	0.38764	431.681	511.341	372.783	397.789	524.471	380.845	556.949	596.228	351.5	396.5	547	385	579	600	middle
550	PC-5p-59574_98	TAATAATTCTCCTCCTTGGCC	up	1.36916	0.453287	0.387977	13.6651	18.7096	10.6055	15.0488	15.341	14.8381	13.4668	27.824	10	15	16	15	14	28	middle
551	PC-5p-36704_154	TTTTGGATTGGATGCTCAGAT	down	0.696043	-0.522751	0.388639	30.904	21.5105	43.4825	29.0943	20.1351	7.91367	30.7813	25.8366	41	29	21	8	32	26	middle
552	PC-5p-366_4541	ACCCTCTTTTCTTTCCGGTATT	up	1.17267	0.229796	0.388745	1727.99	2026.36	1531.96	1815.89	1836.13	2297.93	1485.68	2295.48	1444.5	1810	1915	2323	1544.5	2310	high
553	PC-3p-291815_13	AAGACGTCGTGTCCTGAAGTTTGA	down	0.377058	-1.40714	0.389591	5.24698	1.97842	0	9.02926	6.71169	5.93525	0	0	0	9	7	6	0	0	low
554	PC-3p-44050_131	TATCTTTAAGTTTGGTAGTGC	up	1.35454	0.437799	0.391517	18.3282	24.8262	16.9688	14.0455	23.9703	33.6331	26.9336	13.912	16	14	25	34	28	14	middle
555	PC-3p-222228_20	AACTGACACACTTTAGCTCTAGAG	down	0.333593	-1.58384	0.39237	4.94219	1.64868	0	10.0325	4.79406	4.94604	0	0	0	10	5	5	0	0	middle
556	PC-5p-349378_10	AGGTGATGTGGCACCTCTCTTAGG	down	0.335112	-1.57728	0.393615	2.4711	0.828095	0	5.01626	2.39703	0	0	2.48428	0	5	2.5	0	0	2.5	low
557	mtr-miR171b	TGATTGAGCCGCGTCAATATC	up	1.27869	0.354666	0.39396	18.8351	24.0843	17.4991	25.5829	13.4234	18.795	21.1621	32.2957	16.5	25.5	14	19	22	32.5	middle
558	gma-miR5368_L+4R+1	CAAGGGACAGTCTCAGGTAGACAG	down	0.515495	-0.955969	0.394621	16.3198	8.41278	22.2715	18.0585	8.62931	22.2572	0	2.98114	21	18	9	22.5	0	3	middle
559	hbr-MIR6173-p3_2ss21AG22TC	TGCGTATCGACCCGTGCAGTGC	down	0.629474	-0.66778	0.395062	74.1488	46.6748	116.13	73.2374	33.079	73.696	22.605	43.7234	109.5	73	34.5	74.5	23.5	44	middle
560	hbr-miR6173_L-1R+1	GCCGTAAACGATGGATACTA	down	0.567057	-0.818434	0.39597	21.0743	11.9504	37.6495	14.5471	11.0263	18.795	10.1001	6.956	35.5	14.5	11.5	19	10.5	7	middle
561	PC-3p-151665_35	AAAGGAGCCTCACACAACTAATGT	up	2.83853	1.50514	0.396489	3.68521	10.4606	5.30275	0	5.75288	21.7626	9.61915	0	5	0	6	22	10	0	middle
562	nta-miR164a	TGGAGAAGCAGGGCACGTGCA	up	1.11057	0.151297	0.397812	21767.2	24174	20123.9	19382.8	25794.9	22539.1	22815.7	27167.1	18975	19320	26903	22785	23719	27339	high
563	PC-5p-242121_18	AAGGGATGTTATTTAGAGATTAGT	down	0.381249	-1.39119	0.398692	4.32442	1.64868	5.30275	0	7.6705	4.94604	0	0	5	0	8	5	0	0	low
564	gma-MIR4995-p5_1	CTCATAGGCAGTGGCTTGGT	down	0.659391	-0.600794	0.398983	13.655	9.00397	21.211	13.0423	6.71169	13.3543	7.69532	5.96228	20	13	7	13.5	8	6	middle
565	gma-MIR4995-p5_2	TCATAGGCAGTGGCTTGGTTAA	down	0.659391	-0.600794	0.398983	13.655	9.00397	21.211	13.0423	6.71169	13.3543	7.69532	5.96228	20	13	7	13.5	8	6	middle
566	mdm-miR10986	TGGCACCAAAGTCACCACCCG	up	1.57481	0.655175	0.400791	4.79644	7.55346	6.36329	8.02601	0	7.91367	4.80957	9.93714	6	8	0	8	5	10	low
567	gma-MIR4995-p5_1ss14GC	TTGGTTAAGGGAACCCAC	down	0.357804	-1.48276	0.401042	2.30389	0.82434	0	4.51463	2.39703	2.47302	0	0	0	4.5	2.5	2.5	0	0	low
568	hbr-MIR6173-p5_2ss24AG25GC	GATTAGATACCCCAGTAGTCCTAGC	down	0.742377	-0.429777	0.401339	34.2894	25.4557	43.4825	31.1008	28.285	40.5575	13.9478	21.8617	41	31	29.5	41	14.5	22	middle
569	PC-3p-22213_230	ATAAGTACCCCCTAACCTATGACC	up	1.27758	0.353414	0.40138	44.3838	56.7039	29.6954	41.1333	62.3228	74.1906	44.2481	51.6731	28	41	65	75	46	52	middle
570	nta-MIR6144-p3	CTTGTTGAAGAAGTTTCCATC	up	1.1034	0.14195	0.401583	4474.59	4937.25	4551.88	4048.12	4823.79	4109.17	5462.71	5239.85	4292	4035	5031	4154	5679	5273	high
571	nta-miR397_R+1	ATTGAGTGCAGCGTTGATGTC	up	1.60976	0.686843	0.402782	15.2277	24.5128	22.2715	9.02926	14.3822	7.91367	28.8574	36.7674	21	9	15	8	30	37	middle
572	PC-3p-9673_402	TTATATGTTCTTGCAATTCTT	down	0.683609	-0.548757	0.405562	82.1695	56.1718	92.2678	105.341	48.8994	26.7086	99.0772	42.7297	87	105	51	27	103	43	middle
573	PC-3p-26265_203	TTGGAGCAGATTTGCACGTTT	down	0.775535	-0.366736	0.408927	21.1712	16.419	25.4532	15.0488	23.0115	13.8489	11.062	24.346	24	15	24	14	11.5	24.5	middle
574	nta-miR160d	TGCCTGGCTCCCTGCATGCCA	up	1.13425	0.181735	0.409353	242.155	274.664	224.836	198.644	302.985	268.075	287.612	268.303	212	198	316	271	299	270	middle
575	PC-3p-222557_20	CAATCACTTATATAGGACCCGGAGA	up	1.5439	0.62658	0.409816	3.90932	6.03559	0	5.01626	6.71169	4.94604	7.69532	5.46543	0	5	7	5	8	5.5	low
576	nta-miR160a	TGCCTGGCTCCCTGTATGCCA	up	1.28424	0.360917	0.410204	3396.89	4362.42	2436.97	3479.95	4273.75	2950.64	5969.32	4167.3	2297.83	3468.67	4457.33	2982.83	6205.67	4193.67	high
577	stu-MIR5303i-p5_2ss12TG24AG	AAAATGTTGTCGCACCCGTGTCGG	up	1.52302	0.606937	0.411508	3.76433	5.73315	0	6.01951	5.27347	6.92446	4.80957	5.46543	0	6	5.5	7	5	5.5	low
578	ptc-miR482a.1_L+5R-1_1ss14TG	TCTTGCCTACTCCGCCCATTC	down	0.864716	-0.209701	0.413375	28.4471	24.5986	30.2256	32.104	23.0115	28.1924	18.2764	27.3271	28.5	32	24	28.5	19	27.5	middle
579	csi-MIR160c-p5_2ss18GT19CT	TGCCTGGCTCCCTGTATTTT	up	1.58804	0.667246	0.413428	33.1547	52.651	14.8477	27.0878	57.5288	36.6007	86.5723	34.78	14	27	60	37	90	35	middle
580	PC-3p-254357_17	TGTGCCCATGGGGCAAGCGGG	down	0.408547	-1.29143	0.413615	3.92413	1.60319	0	6.01951	5.75288	0	4.80957	0	0	6	6	0	5	0	low
581	lja-MIR11097b-p5_2ss12GA23AT	TTTACACCGTCAGTGCATAGAATT	down	0.40435	-1.30632	0.413672	3.17189	1.28255	4.2422	0	5.27347	0	3.84766	0	4	0	5.5	0	4	0	low
582	lja-MIR11097b-p3_2ss12GA23AT_2	TTTACACCGTCAGTGCATAGAATT	down	0.40435	-1.30632	0.413672	3.17189	1.28255	4.2422	0	5.27347	0	3.84766	0	4	0	5.5	0	4	0	low
583	PC-3p-144649_37	CGATCCAGGCCTTCCATTTTTCCC	up	1.52151	0.605504	0.414004	10.1685	15.4715	11.666	14.0455	4.79406	21.7626	5.77149	18.8806	11	14	5	22	6	19	middle
584	mtr-MIR171c-p3	TTGAGCCGTGCCAATATTT	up	1.54435	0.627004	0.415453	2.11446	3.26547	0	2.50813	3.83525	2.96762	3.84766	2.98114	0	2.5	4	3	4	3	low
585	gma-MIR9724-p5_1ss24CT	AATCCTCACCTCAAAAGCTAGCTT	down	0.429478	-1.21935	0.415517	5.30018	2.27631	5.83302	0	10.0675	3.46223	3.3667	0	5.5	0	10.5	3.5	3.5	0	middle
586	PC-5p-2620_829	TCCTTCAGCTGTTGTTCAGCCC	up	1.27323	0.348492	0.417489	131.807	167.821	81.6623	113.367	200.392	157.284	169.297	176.881	77	113	209	159	176	178	middle
587	ath-miR8175_L+5	GGTTCGATCCCCGGCAACGGCGCCA	up	2.6159	1.38731	0.418471	0.883791	2.31191	2.65137	0	0	4.45144	0	2.48428	2.5	0	0	4.5	0	2.5	low
588	nta-MIR6021-p3	CATCACAGTTCACTCCTTCCC	up	1.07762	0.107848	0.418826	4809.69	5183.02	5007.91	4542.72	4878.44	5393.16	4474.83	5681.06	4722	4528	5088	5452	4652	5717	high
589	nta-MIR166c-p5	GGAATGCTGTCTGGTTCGAAA	down	0.497545	-1.0071	0.419009	15.4666	7.69532	16.9688	15.0488	14.3822	0	23.086	0	16	15	15	0	24	0	middle
590	PC-3p-49915_116	AGATTCCTTGGAGGAAAAGAC	up	1.30574	0.384871	0.419103	16.5922	21.6652	8.48439	23.0748	18.2174	24.7302	14.4287	25.8366	8	23	19	25	15	26	middle
591	PC-5p-169062_30	AACCGACACTAGTTCTGCGAGACT	down	0.620091	-0.689449	0.419437	14.1347	8.76482	5.30275	15.0488	22.0527	5.93525	15.3906	4.96857	5	15	23	6	16	5	middle
592	nta-miR6024	TTTTAGCCAGAGTTGTTTTCCC	up	1.08174	0.11336	0.420682	3155.9	3413.88	3074.53	2982.67	3410.5	3000.27	3391.71	3849.65	2899	2973	3557	3033	3526	3874	high
593	gma-miR166h-5p_R+1	GGAATGTTGTTTGGCTCGAGGT	down	0.405169	-1.3034	0.422522	4.88294	1.97842	0	6.01951	8.62931	5.93525	0	0	0	6	9	6	0	0	low
594	ssl-MIR171a-p3	TATTTGATTGAGCCGTGCCAA	up	inf	inf	0.42265	0	1.60319	0	0	0	0	4.80957	0	0	0	0	0	5	0	low
595	stu-MIR319b-p5	AGCTCCTTTCAGGCCAAGACC	up	inf	inf	0.42265	0	2.24447	0	0	0	0	6.7334	0	0	0	0	0	7	0	low
596	stu-miR167a-3p_L+4_1ss18CT	ATCAGATCATGTGGCAGTCTCACC	up	inf	inf	0.42265	0	1.64868	0	0	0	4.94604	0	0	0	0	0	5	0	0	low
597	bdi-MIR171e-p3	TTGAGCCGTGCCAATATCTCT	down	-inf	-inf	0.42265	0.883791	0	2.65137	0	0	0	0	0	2.5	0	0	0	0	0	low
598	sly-miR390a-5p_R+1_1ss19AG	AAGCTCAGGAGGGATAGCGCCT	up	inf	inf	0.42265	0	1.92383	0	0	0	0	5.77149	0	0	0	0	0	6	0	low
599	osa-miR390-5p_R+1	AAGCTCAGGAGGGATAGCGCCT	up	inf	inf	0.42265	0	1.92383	0	0	0	0	5.77149	0	0	0	0	0	6	0	low
600	rgl-miR7972_2ss14TG21CT	TTGTCAGGCTTGTGATTCTCT	up	inf	inf	0.42265	0	2.63789	0	0	0	7.91367	0	0	0	0	0	8	0	0	low
601	osa-miR160a-5p_R+2_1ss21AT	TGCCTGGCTCCCTGTATGCCTCT	up	inf	inf	0.42265	0	1.64868	0	0	0	4.94604	0	0	0	0	0	5	0	0	low
602	aof-MIR166b-p3_1ss18CA	TCGGACCAGGCTTCATTATT	up	inf	inf	0.42265	0	2.24447	0	0	0	0	6.7334	0	0	0	0	0	7	0	low
603	stu-MIR395f-p5_1ss13AG	GTTCCCTTGACCGCTTCATGA	up	inf	inf	0.42265	0	1.64868	0	0	0	4.94604	0	0	0	0	0	5	0	0	low
604	stu-miR477a-5p	CCTCTCCCTCAAGGGCTTCTC	up	inf	inf	0.42265	0	2.14328	0	0	0	6.42985	0	0	0	0	0	6.5	0	0	low
605	gma-MIR6300-p3_1ss12AG	AGTATAGTGGTGAGTATTCCCGCC	down	-inf	-inf	0.42265	2.0065	0	0	6.01951	0	0	0	0	0	6	0	0	0	0	low
606	gma-miR6300_R+2_2	GTCGTTGTAGTATAGTGGTG	down	-inf	-inf	0.42265	2.34092	0	0	7.02276	0	0	0	0	0	7	0	0	0	0	low
607	gma-miR6300_R+2_1	GTCGTTGTAGTATAGTGGTA	down	-inf	-inf	0.42265	2.34092	0	0	7.02276	0	0	0	0	0	7	0	0	0	0	low
608	rgl-miR7972_R+3_1ss14TG	TTGTCAGGCTTGTGATTCTCCTTC	down	-inf	-inf	0.42265	1.00325	0	0	3.00975	0	0	0	0	0	3	0	0	0	0	low
609	sly-MIR7981d-p5_1ss8TC	ATAAGTTCAGGAGGTAATAGGACC	down	-inf	-inf	0.42265	1.76758	0	5.30275	0	0	0	0	0	5	0	0	0	0	0	low
610	sly-MIR9479-p3_2ss22GA24TG	TTTAAGTGGAGAATGGTAGAGAGG	down	-inf	-inf	0.42265	1.76758	0	5.30275	0	0	0	0	0	5	0	0	0	0	0	low
611	sly-MIR9479-p5_2ss22GA24TG	TTTAAGTGGAGAATGGTAGAGAGG	down	-inf	-inf	0.42265	1.76758	0	5.30275	0	0	0	0	0	5	0	0	0	0	0	low
612	cme-miR156a_1ss1TC	CGACAGAAGAGAGTGAGCAC	up	inf	inf	0.42265	0	2.56511	0	0	0	0	7.69532	0	0	0	0	0	8	0	low
613	aof-miR168b_L+1_1ss22CT	CTCGCTTGGTGCAGGTCGGGTT	up	inf	inf	0.42265	0	1.64868	0	0	0	4.94604	0	0	0	0	0	5	0	0	low
614	bdi-miR444c	TGCAGTTGTTGTCTCAAGCTT	up	inf	inf	0.42265	0	4.48894	0	0	0	0	13.4668	0	0	0	0	0	14	0	middle
615	sly-miR482a_L+3	ATCTTTCCAATTCCACCCATTCCTA	up	inf	inf	0.42265	0	1.64868	0	0	0	4.94604	0	0	0	0	0	5	0	0	low
616	gra-miR482d_R-2_1ss12CA	TTTCCTATGCCACCCATTCC	down	-inf	-inf	0.42265	1.76758	0	5.30275	0	0	0	0	0	5	0	0	0	0	0	low
617	ata-miR528-5p	TGGAAGGGGCATGCAGAGGAG	up	inf	inf	0.42265	0	3.20638	0	0	0	0	9.61915	0	0	0	0	0	10	0	low
618	csi-miR536-3p_1ss20TA	TGGTGCCACGCTGTGTGCGAC	down	-inf	-inf	0.42265	0.836043	0	0	2.50813	0	0	0	0	0	2.5	0	0	0	0	low
619	mdm-miR1511	ACCTAGCTCTGATACCATGAA	up	inf	inf	0.42265	0	2.96762	0	0	0	8.90287	0	0	0	0	0	9	0	0	low
620	mtr-miR2111a-5p_R+1_1ss21AT	TAATCTGCATCCTGAGGTTTTT	up	inf	inf	0.42265	0	2.30815	0	0	0	6.92446	0	0	0	0	0	7	0	0	low
621	osa-miR2118o_1ss1CT	TTCCTGATGCCTCCCAAGCCTA	up	inf	inf	0.42265	0	4.1683	0	0	0	0	12.5049	0	0	0	0	0	13	0	middle
622	ata-miR2118b-5p	TTCCCGATGCCTCCCATTCCTA	up	inf	inf	0.42265	0	7.37468	0	0	0	0	22.124	0	0	0	0	0	23	0	middle
623	zma-miR2275b-3p_1ss22AG	TTCAGTTTCCTCTAATATCTCG	up	inf	inf	0.42265	0	5.45085	0	0	0	0	16.3525	0	0	0	0	0	17	0	middle
624	osa-miR2275d	CTTGTTTTTCTCCAATATCTCA	up	inf	inf	0.42265	0	4.80957	0	0	0	0	14.4287	0	0	0	0	0	15	0	middle
625	gma-miR4995_L+1R+2_1ss7GA	TAGGCAATGGCTTGGTTAAGGGAA	up	inf	inf	0.42265	0	1.64868	0	0	0	4.94604	0	0	0	0	0	5	0	0	low
626	osa-miR5497	CAGAATATCTGGGACGAGCAT	up	inf	inf	0.42265	0	3.20638	0	0	0	0	9.61915	0	0	0	0	0	10	0	low
627	osa-miR5509	TAGGCATTTTCTCTTGGCATG	up	inf	inf	0.42265	0	2.56511	0	0	0	0	7.69532	0	0	0	0	0	8	0	low
628	osa-miR5538_R+2	ACTGAACTCAATCACTTGCTGCCG	down	-inf	-inf	0.42265	1.67209	0	0	5.01626	0	0	0	0	0	5	0	0	0	0	low
629	osa-miR5793	CGAGGACGAGATACAGTGCAG	up	inf	inf	0.42265	0	1.60319	0	0	0	0	4.80957	0	0	0	0	0	5	0	low
630	osa-miR5796	TCATTCAGGATTGAAGCCGCC	up	inf	inf	0.42265	0	2.24447	0	0	0	0	6.7334	0	0	0	0	0	7	0	low
631	osa-miR5818	TCGAACTAGAAGGGCCAGGTT	up	inf	inf	0.42265	0	2.24447	0	0	0	0	6.7334	0	0	0	0	0	7	0	low
632	sly-miR10533_L+1R+1_1ss17GA	ATCTTATGAATTCTAGATCTTCTT	up	inf	inf	0.42265	0	2.24447	0	0	0	0	6.7334	0	0	0	0	0	7	0	low
633	PC-3p-449386_6	AACTGTGGTCCTCAGAGGGA	down	-inf	-inf	0.42265	1.00325	0	0	3.00975	0	0	0	0	0	3	0	0	0	0	low
634	PC-5p-385124_8	TCCCTCTTGAGGACCACAGATT	down	-inf	-inf	0.42265	2.67534	0	0	8.02601	0	0	0	0	0	8	0	0	0	0	low
635	PC-5p-746285_5	TATGCATGGTCTTTTCTTTCAAAA	down	-inf	-inf	0.42265	0.836043	0	0	2.50813	0	0	0	0	0	2.5	0	0	0	0	low
636	PC-3p-716680_5	ATTTTTGAATGGAAGGCCCATGTGT	up	inf	inf	0.42265	0	0.801596	0	0	0	0	2.40479	0	0	0	0	0	2.5	0	low
637	PC-3p-411347_7	TTCTTTTTATTGGACTGCTCA	down	-inf	-inf	0.42265	1.23731	0	3.71192	0	0	0	0	0	3.5	0	0	0	0	0	low
638	PC-5p-681191_5	TGAAAGAGAAGATGCAGGATAC	down	-inf	-inf	0.42265	0.836043	0	0	2.50813	0	0	0	0	0	2.5	0	0	0	0	low
639	PC-3p-376979_8	TGGAAATCAAGAATATAAAGC	down	-inf	-inf	0.42265	1.33767	0	0	4.01301	0	0	0	0	0	4	0	0	0	0	low
640	PC-5p-516273_6	ATACGGAGAAACGCGGTAGAG	up	inf	inf	0.42265	0	0.961915	0	0	0	0	2.88574	0	0	0	0	0	3	0	low
641	PC-5p-697344_5	AACTGACATTAGTTGTGCGAGACC	up	inf	inf	0.42265	0	1.60319	0	0	0	0	4.80957	0	0	0	0	0	5	0	low
642	PC-5p-546196_5	TATTTTGTTTGTATGCCCCATCCG	down	-inf	-inf	0.42265	1.76758	0	5.30275	0	0	0	0	0	5	0	0	0	0	0	low
643	PC-3p-561102_5	ACCCTACACTTCTCTCAACTACA	up	inf	inf	0.42265	0	1.60319	0	0	0	0	4.80957	0	0	0	0	0	5	0	low
644	PC-5p-410416_7	CTTCGGTCAAGATCTTCCATC	down	-inf	-inf	0.42265	2.34092	0	0	7.02276	0	0	0	0	0	7	0	0	0	0	low
645	PC-3p-554535_5	TCCAAATGACTGACATTATC	down	-inf	-inf	0.42265	1.76758	0	5.30275	0	0	0	0	0	5	0	0	0	0	0	low
646	PC-3p-721918_5	ACTACCTAATTTCTAAATAACAGC	up	inf	inf	0.42265	0	1.60319	0	0	0	0	4.80957	0	0	0	0	0	5	0	low
647	PC-3p-437810_7	TTACATTCAAGGCGAGTAAAC	up	inf	inf	0.42265	0	2.30815	0	0	0	6.92446	0	0	0	0	0	7	0	0	low
648	PC-5p-376942_8	ACATTAGTTGTGTGAGGCTCTTT	down	-inf	-inf	0.42265	2.67534	0	0	8.02601	0	0	0	0	0	8	0	0	0	0	low
649	PC-5p-394558_8	CTTGATATTTATTCCTGCAAT	up	inf	inf	0.42265	0	2.56511	0	0	0	0	7.69532	0	0	0	0	0	8	0	low
650	PC-5p-364313_10	AAAAATCTCTTTGAACACAATATT	up	inf	inf	0.42265	0	1.60319	0	0	0	0	4.80957	0	0	0	0	0	5	0	low
651	PC-5p-355917_10	AATGTAAAAGTGTGGTAGATTAGC	up	inf	inf	0.42265	0	1.60319	0	0	0	0	4.80957	0	0	0	0	0	5	0	low
652	PC-5p-496284_6	ATTTCATGCCACTACCGTTACACA	down	-inf	-inf	0.42265	1.83929	0	0	5.51788	0	0	0	0	0	5.5	0	0	0	0	low
653	PC-5p-540207_5	AAGAGAAGATGCAGGATACAA	down	-inf	-inf	0.42265	0.836043	0	0	2.50813	0	0	0	0	0	2.5	0	0	0	0	low
654	PC-5p-714549_5	TCCGTTTGTATTCTTTCCGCT	down	-inf	-inf	0.42265	0.883791	0	2.65137	0	0	0	0	0	2.5	0	0	0	0	0	low
655	PC-5p-572607_5	ATGCCCCCACCAGAAACTATTTAC	up	inf	inf	0.42265	0	1.64868	0	0	0	4.94604	0	0	0	0	0	5	0	0	low
656	PC-3p-488416_6	TGTAAATAGTTTCTGATGCGGGCT	up	inf	inf	0.42265	0	1.97842	0	0	0	5.93525	0	0	0	0	0	6	0	0	low
657	PC-3p-752626_5	CGAACTCACCGATACAAAGGTT	up	inf	inf	0.42265	0	1.60319	0	0	0	0	4.80957	0	0	0	0	0	5	0	low
658	PC-5p-691387_5	AGCGTGGGGGACATATGGAATACC	up	inf	inf	0.42265	0	1.60319	0	0	0	0	4.80957	0	0	0	0	0	5	0	low
659	PC-5p-390918_8	AGCGTTAATCGGGAAGAAAGAACT	up	inf	inf	0.42265	0	2.56511	0	0	0	0	7.69532	0	0	0	0	0	8	0	low
660	PC-5p-443247_6	ATGTTATGCTGGAACTCCAATATA	up	inf	inf	0.42265	0	1.92383	0	0	0	0	5.77149	0	0	0	0	0	6	0	low
661	PC-5p-460309_6	ACAAAATATATGATCTTTAGTTAC	down	-inf	-inf	0.42265	4.01301	0	0	12.039	0	0	0	0	0	12	0	0	0	0	middle
662	PC-3p-701406_5	AACTAATGACCGTATATTTTGTTG	up	inf	inf	0.42265	0	1.60319	0	0	0	0	4.80957	0	0	0	0	0	5	0	low
663	PC-5p-654008_5	GTGCCTCACACAACTGACACTAGT	up	inf	inf	0.42265	0	1.64868	0	0	0	4.94604	0	0	0	0	0	5	0	0	low
664	PC-5p-655685_5	TTATTTAAACAGAGGGACACGTGT	down	-inf	-inf	0.42265	1.76758	0	5.30275	0	0	0	0	0	5	0	0	0	0	0	low
665	PC-5p-485288_6	TATCGGCAAGTCTGACACAAG	up	inf	inf	0.42265	0	1.92383	0	0	0	0	5.77149	0	0	0	0	0	6	0	low
666	PC-3p-538611_6	TAATATATTAGTTGAATTTT	up	inf	inf	0.42265	0	1.92383	0	0	0	0	5.77149	0	0	0	0	0	6	0	low
667	PC-5p-733653_5	TTTTCGTGGTCGGAAAGGCATACC	up	inf	inf	0.42265	0	1.60319	0	0	0	0	4.80957	0	0	0	0	0	5	0	low
668	PC-3p-292184_13	TTACATGGCTGAAAAGTGACC	up	inf	inf	0.42265	0	4.1683	0	0	0	0	12.5049	0	0	0	0	0	13	0	middle
669	PC-5p-535875_6	ACCGGAACTCCAGTATAATATGCT	up	inf	inf	0.42265	0	1.92383	0	0	0	0	5.77149	0	0	0	0	0	6	0	low
670	PC-3p-364351_10	AAGGTATAGCACGGTGAATAACTA	up	inf	inf	0.42265	0	3.29736	0	0	0	9.89208	0	0	0	0	0	10	0	0	low
671	PC-5p-473213_6	AAGGTTCAAATCCTCGATCCGCCT	down	-inf	-inf	0.42265	2.0065	0	0	6.01951	0	0	0	0	0	6	0	0	0	0	low
672	PC-3p-719191_5	TTCGATCTACTCCCTACATCT	down	-inf	-inf	0.42265	1.76758	0	5.30275	0	0	0	0	0	5	0	0	0	0	0	low
673	PC-5p-519052_6	ATACTCATCTTGTGGATATCTTGG	up	inf	inf	0.42265	0	1.97842	0	0	0	5.93525	0	0	0	0	0	6	0	0	low
674	PC-3p-385210_8	AGACATGTTTTTTGACCCGACCCA	up	inf	inf	0.42265	0	2.63789	0	0	0	7.91367	0	0	0	0	0	8	0	0	low
675	PC-3p-419453_7	AATCCTCGCCCTCCATTTTTC	down	-inf	-inf	0.42265	4.2422	0	12.7266	0	0	0	0	0	12	0	0	0	0	0	middle
676	PC-5p-328551_11	AAAGTTATGTTGCACGGACTCTTC	up	inf	inf	0.42265	0	3.52702	0	0	0	0	10.5811	0	0	0	0	0	11	0	middle
677	PC-3p-586735_5	AGGCCTCATACAACTATTGTCAGT	up	inf	inf	0.42265	0	3.20638	0	0	0	0	9.61915	0	0	0	0	0	10	0	low
678	PC-5p-328196_11	ATTTAAGATAATTTAACCCCGCCC	up	inf	inf	0.42265	0	3.6271	0	0	0	10.8813	0	0	0	0	0	11	0	0	middle
679	PC-5p-390595_8	TATTAAAGCAATTCGCAGTAC	up	inf	inf	0.42265	0	4.28657	0	0	0	12.8597	0	0	0	0	0	13	0	0	middle
680	PC-3p-625479_5	AGACTTAAGTTCAGCAGCAATATC	up	inf	inf	0.42265	0	1.64868	0	0	0	4.94604	0	0	0	0	0	5	0	0	low
681	PC-5p-494365_6	TATTAAAGCAATTCGCAGTACTAT	up	inf	inf	0.42265	0	1.97842	0	0	0	5.93525	0	0	0	0	0	6	0	0	low
682	PC-5p-469429_6	ATAGCCATTGTACTGGAGTTT	up	inf	inf	0.42265	0	3.52702	0	0	0	0	10.5811	0	0	0	0	0	11	0	middle
683	PC-5p-291068_13	AATTTCGGAAGAATTTTTATCAAC	up	inf	inf	0.42265	0	4.1683	0	0	0	0	12.5049	0	0	0	0	0	13	0	middle
684	PC-3p-432095_7	ATAACGGTAGGGATAAACTTGACC	up	inf	inf	0.42265	0	2.30815	0	0	0	6.92446	0	0	0	0	0	7	0	0	low
685	PC-5p-496669_6	AAAACCTCTCTGTAACAACCTCGT	up	inf	inf	0.42265	0	3.95683	0	0	0	11.8705	0	0	0	0	0	12	0	0	middle
686	PC-3p-551973_5	ATTCGAACTCTAGTGTATTATGCT	up	inf	inf	0.42265	0	1.60319	0	0	0	0	4.80957	0	0	0	0	0	5	0	low
687	PC-5p-502914_6	ATTTCATGGCACTACCGTTATACA	down	-inf	-inf	0.42265	3.00975	0	0	9.02926	0	0	0	0	0	9	0	0	0	0	low
688	PC-5p-234140_19	TACTACGTTTCTTCATCGTCT	up	2.58591	1.37067	0.42597	0.883791	2.28541	2.65137	0	0	4.45144	2.40479	0	2.5	0	0	4.5	2.5	0	low
689	PC-5p-301197_12	AAGAGCTATGTTGCGCGGACCCTC	down	0.420139	-1.25106	0.426359	3.92413	1.64868	0	6.01951	5.75288	4.94604	0	0	0	6	6	5	0	0	low
690	stu-miR166b_L+1_1ss21TC	ATCGGACCAGGCTTCATTCCCC	up	1.14603	0.196645	0.426858	1639.3	1878.68	1674.08	1302.22	1941.6	2262.32	1605.92	1767.82	1578.5	1298	2025	2287	1669.5	1779	high
691	ptc-miR168a-3p_L+3	AATCCCGCCTTGCATCAACTGAAT	up	2.7361	1.45212	0.428984	1.91763	5.24681	0	0	5.75288	0	4.80957	10.9309	0	0	6	0	5	11	middle
692	PC-5p-201912_23	AGGGCCGACCTGAGAACATATGTA	down	0.352594	-1.50392	0.429701	2.80551	0.989208	0	6.01951	2.39703	2.96762	0	0	0	6	2.5	3	0	0	low
693	gma-miR5368_L+3R+1	AAGGGACAGTCTCAGGTAGACAG	down	0.546889	-0.870679	0.430304	9.61216	5.25679	17.4991	7.02276	4.31466	10.8813	2.40479	2.48428	16.5	7	4.5	11	2.5	2.5	middle
694	PC-3p-137898_39	ATTTCCCTCTTGAGAAGTTTGGCC	up	1.56347	0.644752	0.431252	4.99754	7.8135	6.36329	0	8.62931	5.93525	11.543	5.96228	6	0	9	6	12	6	middle
695	ptc-miR6478_1ss21GA	CCGACCTTAGCTCAGTTGGTA	down	0.772953	-0.371547	0.432094	17.0414	13.1722	19.6202	18.5602	12.944	9.89208	20.6812	8.94342	18.5	18.5	13.5	10	21.5	9	middle
696	PC-3p-15226_302	TATACCGTCAACCAAACATAGCAT	up	1.22895	0.297431	0.432805	41.5205	51.0268	39.7706	52.6707	32.1202	65.2877	34.6289	53.1637	37.5	52.5	33.5	66	36	53.5	middle
697	rgl-MIR7972-p3_1ss11TG	TCAGGCTTGTGATTCTCCTTC	down	0.817179	-0.291276	0.433496	184.534	150.797	246.047	146.475	161.081	166.187	179.878	106.327	232	146	168	168	187	107	middle
698	mdm-miR171g_L+1	CTGATTGAGCCGTGCCAATATC	up	1.34107	0.423388	0.43352	59.1454	79.3183	43.4825	80.2601	53.6935	51.4388	69.2579	117.258	41	80	56	52	72	118	middle
699	rgl-MIR5141-p3_1ss2GA	AACGGCAGACCCGACGCGACTGAC	up	1.30059	0.379161	0.433584	39.2573	51.0574	24.3926	30.0975	63.2816	49.4604	49.0576	54.6543	23	30	66	50	51	55	middle
700	PC-3p-313370_12	TTTGGAATCATCTCATCACTT	up	2.33915	1.22598	0.434478	1.67209	3.91126	0	5.01626	0	0	5.77149	5.96228	0	5	0	0	6	6	low
701	nta-miR477a	ACTCTCCCTCAAGGGCTTCTG	up	8.75523	3.13014	0.435646	3.19604	27.9821	0	0	9.58813	79.1367	4.80957	0	0	0	10	80	5	0	middle
702	stu-MIR5303h-p5_2ss5TA17TC	AAAAATGTTGCCGCACCCGTGTCG	up	1.68778	0.755124	0.438044	3.47435	5.86392	0	8.02601	2.39703	5.44065	8.17627	3.97486	0	8	2.5	5.5	8.5	4	low
703	PC-3p-16684_284	TTTCCTATGCCACCCATTCCTG	down	0.363824	-1.45869	0.439462	71.135	25.8806	165.446	22.0715	25.8879	42.536	20.2002	14.9057	156	22	27	43	21	15	middle
704	PC-3p-3899_666	AAGTTCTTCTCATGGGGCAAGCGG	up	1.18638	0.246566	0.442455	134.834	159.964	88.5558	173.563	142.384	131.565	179.397	168.931	83.5	173	148.5	133	186.5	170	middle
705	PC-3p-206548_23	ATAAAATGACTCGGATGGGGC	up	2.32971	1.22015	0.443607	2.23723	5.21209	0	0	6.71169	8.90287	6.7334	0	0	0	7	9	7	0	low
706	PC-3p-187810_26	AGTGTGGCTACATTTTGGAGA	down	0.51428	-0.959374	0.444697	7.05276	3.6271	7.42384	7.02276	6.71169	10.8813	0	0	7	7	7	11	0	0	middle
707	fve-miR156a	TTGACAGAAGAGAGTGAGCAC	up	1.12482	0.169691	0.44522	13.9563	15.6982	13.7871	17.0553	11.0263	17.3111	15.8716	13.912	13	17	11.5	17.5	16.5	14	middle
708	ptc-miR156a_L+1	TTGACAGAAGAGAGTGAGCAC	up	1.12482	0.169691	0.44522	13.9563	15.6982	13.7871	17.0553	11.0263	17.3111	15.8716	13.912	13	17	11.5	17.5	16.5	14	middle
709	sly-miR171f	TATTGGCCTGGTTCACTCAGA	up	1.14063	0.189835	0.447366	7332.36	8363.54	6475.71	6063.65	9457.73	8332.1	9182.44	7576.07	6106	6044	9864	8423	9546	7624	high
710	nta-miR6157_L+2R+1_1ss23GA	AATGGTAGACGTAGGATTTGAAAAC	down	0.434643	-1.2021	0.44765	3.79318	1.64868	6.36329	5.01626	0	4.94604	0	0	6	5	0	5	0	0	low
711	PC-5p-152051_35	GGAGGTGTCGAAAGATATAGT	up	2.8132	1.49221	0.448214	4.59296	12.9209	0	8.02601	5.75288	0	29.8194	8.94342	0	8	6	0	31	9	middle
712	PC-3p-67071_87	TTGGAAAAGTTAAGGGATGAT	up	1.41407	0.499853	0.448566	6.001	8.48583	11.1358	3.51138	3.35584	6.42985	10.5811	8.44657	10.5	3.5	3.5	6.5	11	8.5	middle
713	PC-3p-57204_102	ATGTCGAGATTTGTTACACCGAGT	up	1.1982	0.260872	0.452351	18.6435	22.3387	15.9082	16.052	23.9703	18.3004	29.3384	19.3774	15	16	25	18.5	30.5	19.5	middle
714	gma-MIR4995-p3_1ss1AG	GACTCATAGGCAGTGGCTT	down	0.518246	-0.948292	0.453816	5.40816	2.80276	6.89357	5.01626	4.31466	8.40827	0	0	6.5	5	4.5	8.5	0	0	low
715	PC-3p-104265_55	AAGATAAATGTGTTTGCTGGCCAT	up	1.60204	0.679911	0.454141	8.25518	13.2251	11.666	3.51138	9.58813	2.96762	16.8335	19.8743	11	3.5	10	3	17.5	20	middle
716	PC-3p-272579_15	TACGCTACCTCCTCGTCCTCCGGC	up	1.96065	0.97133	0.454431	3.34417	6.55674	0	10.0325	0	9.89208	4.80957	4.96857	0	10	0	10	5	5	middle
717	gma-miR156e	CTGACAGAAGATAGAGAGCAC	down	0.761821	-0.392477	0.457074	14.3373	10.9224	14.3174	20.065	8.62931	6.42985	14.9097	11.4277	13.5	20	9	6.5	15.5	11.5	middle
718	osa-miR5083_R+2	AGACTACAATTATCTGATCAAA	down	0.528806	-0.919191	0.457099	12.3992	6.55674	6.36329	25.0813	5.75288	9.89208	4.80957	4.96857	6	25	6	10	5	5	middle
719	PC-5p-466111_6	ATCAAGGCAGTTGGGGGAACAACA	down	0.444772	-1.16886	0.458588	3.60452	1.60319	0	6.01951	4.79406	0	4.80957	0	0	6	5	0	5	0	low
720	ptc-miR408-3p_L-1R+2	TGCACTGCCTCTTCCCTGGCTT	down	0.813325	-0.298097	0.458967	379.37	308.551	502.7	383.242	252.168	250.27	280.879	394.504	474	382	263	253	292	397	middle
721	stu-miR7997c_2ss3AG17TC	ATGTTGCTCGGACTCTCCAAAAAT	down	0.665803	-0.586833	0.459058	7.44448	4.95655	10.6055	5.01626	6.71169	7.91367	0	6.956	10	5	7	8	0	7	middle
722	nta-MIR6158a-p5	TTCGATTTGTACGAAGGGCATG	down	0.879406	-0.185398	0.461149	111.521	98.0725	92.2678	101.83	140.466	91.0072	105.33	97.8808	87	101.5	146.5	92	109.5	98.5	middle
723	nta-MIR6158b-p5	TTCGATTTGTACGAAGGGCATG	down	0.879406	-0.185398	0.461149	111.521	98.0725	92.2678	101.83	140.466	91.0072	105.33	97.8808	87	101.5	146.5	92	109.5	98.5	middle
724	ptc-miR156l_2ss6AG13GA	TTGACGGAAGATAGAGAGCAC	down	0.451458	-1.14734	0.461636	5.32671	2.40479	7.95412	8.02601	0	0	7.21436	0	7.5	8	0	0	7.5	0	low
725	stu-MIR7997a-p5_2ss2GA18CT	GAACTCTTCAAAAATGCTGTTGGG	down	0.559825	-0.836953	0.461699	5.31306	2.97438	10.0752	2.50813	3.35584	4.45144	0	4.47171	9.5	2.5	3.5	4.5	0	4.5	middle
726	PC-3p-234688_19	TGTTCCAGGGTCGAAACTATC	down	0.453334	-1.14135	0.464837	4.24373	1.92383	0	6.01951	6.71169	0	5.77149	0	0	6	7	0	6	0	low
727	mtr-miR399l	TGCCAAAGGAGAGTTGCCCTG	down	0.451757	-1.14638	0.465466	2.12927	0.961915	0	3.51138	2.87644	0	2.88574	0	0	3.5	3	0	3	0	low
728	PC-5p-200151_24	TAAGTTCGTGTCCGAGAAAAT	down	0.526808	-0.924651	0.466534	7.40433	3.90066	11.666	0	10.5469	0	6.7334	4.96857	11	0	11	0	7	5	middle
729	PC-3p-61342_95	TAATTCCATGAATCCTCTAAC	down	0.564668	-0.824525	0.467841	12.4044	7.00435	3.71192	9.53089	23.9703	7.41906	9.61915	3.97486	3.5	9.5	25	7.5	10	4	middle
730	PC-3p-201036_24	AAAAGAGCTCCATACAACTAGTGT	up	2.23947	1.16316	0.468704	1.23731	2.77091	3.71192	0	0	4.94604	3.3667	0	3.5	0	0	5	3.5	0	low
731	PC-5p-86157_67	TGCTGCTTGGAACTGGGATTG	up	1.30621	0.385388	0.469588	5.26219	6.87354	8.48439	2.50813	4.79406	5.44065	6.7334	8.44657	8	2.5	5	5.5	7	8.5	low
732	aqc-MIR482c-p3_2ss16GT20AC	GATGATGATGATGATTATGCTGAT	up	1.36737	0.451409	0.470117	6.06433	8.29221	7.42384	5.01626	5.75288	7.41906	12.9858	4.47171	7	5	6	7.5	13.5	4.5	middle
733	sly-miR394-5p_L+1	CTTGGCATTCTGTCCACCTCC	up	1.15015	0.201824	0.470262	84.1308	96.7631	72.1173	97.817	82.4579	74.6852	121.201	94.4028	68	97.5	86	75.5	126	95	middle
734	mes-miR319h_L-1	TTGGACTGAAGGGAGCTCCT	down	0.71569	-0.482593	0.47195	179.214	128.262	129.387	175.903	232.352	57.3741	235.99	91.4217	122	175.333	242.333	58	245.333	92	middle
735	stu-miR319b	TTGGACTGAAGGGAGCTCCT	down	0.71569	-0.482593	0.47195	179.214	128.262	129.387	175.903	232.352	57.3741	235.99	91.4217	122	175.333	242.333	58	245.333	92	middle
736	PC-5p-124840_44	ATGAAGATTTTGAACCCACTTGAC	up	1.44877	0.534828	0.472775	2.93569	4.25314	0	4.01301	4.79406	3.46223	4.32862	4.96857	0	4	5	3.5	4.5	5	low
737	gma-miR6300_R+7_1	GTCGTTGTAGTATAGTGGTAAGTAT	down	0.432813	-1.20819	0.474638	4.58148	1.98292	3.71192	10.0325	0	2.96762	0	2.98114	3.5	10	0	3	0	3	middle
738	gma-miR6300_R+7_2	GTCGTTGTAGTATAGTGGTGAGTAT	down	0.432813	-1.20819	0.474638	4.58148	1.98292	3.71192	10.0325	0	2.96762	0	2.98114	3.5	10	0	3	0	3	middle
739	nta-miR6025c	TCAATTGAGATGACATCTAGT	up	1.96064	0.971324	0.475604	385.321	755.475	299.075	577.873	279.014	172.122	1576.58	517.725	282	576	291	174	1639	521	middle
740	nta-miR6154a	TGGGTCTCCTGGAGAAAGGTC	down	0.708539	-0.497081	0.475803	76.4735	54.1845	85.9045	101.328	42.1878	33.6331	98.1153	30.8051	81	101	44	34	102	31	middle
741	nta-miR482a	TTTCCAATTCCACCCATTCCTA	up	1.38258	0.467363	0.476237	4956.51	6852.76	3628.67	3587.13	7653.72	10620.6	3997.24	5940.42	3421.5	3575.5	7982.5	10736.5	4155.5	5978	high
742	stu-miR171c-3p_2ss9CT14TC	TGATTGAGTCGTGCCAATATC	up	2.02997	1.02146	0.477303	7.45267	15.1287	5.30275	17.0553	0	4.94604	9.13819	31.302	5	17	0	5	9.5	31.5	middle
743	PC-5p-227722_20	TGCCCCTGTCGTTAAACTTTTGGC	up	2.28474	1.19203	0.477339	1.00325	2.29217	0	3.00975	0	0	2.40479	4.47171	0	3	0	0	2.5	4.5	low
744	PC-5p-242546_18	AACTGACACTAGTTGTATGGAGCT	down	0.466089	-1.10132	0.478856	4.1276	1.92383	6.36329	6.01951	0	0	5.77149	0	6	6	0	0	6	0	low
745	nta-miR1919	GAGCGAGTCATCTGTGACAGG	up	1.37693	0.461457	0.478981	135.259	186.242	102.343	194.129	109.305	104.361	293.384	160.982	96.5	193.5	114	105.5	305	162	middle
746	PC-5p-61571_95	TTTTGCACCTCTTCTTTTGTA	up	1.1288	0.174796	0.480531	14.802	16.7086	18.0293	11.0358	15.341	16.8165	14.4287	18.8806	17	11	16	17	15	19	middle
747	PC-5p-23243_223	CTGTTATGTACTCGGAGCACT	down	0.90138	-0.149793	0.481018	47.9214	43.1954	46.6642	49.1593	47.9406	33.6331	43.2862	52.6668	44	49	50	34	45	53	middle
748	ptc-miR6478_R+2_1ss21GA	CCGACCTTAGCTCAGTTGGTAGA	down	0.837515	-0.255813	0.483718	22.9524	19.223	28.6348	20.5667	19.6557	15.3327	26.9336	15.4026	27	20.5	20.5	15.5	28	15.5	middle
749	ppe-miR1511-3p_L+1R-4	AACCTGGCTCTGATACCA	down	0.880598	-0.183445	0.484275	73.36	64.6007	66.8146	68.8899	84.3755	66.6067	80.1596	47.0358	63	68.6667	88	67.3333	83.3333	47.3333	middle
750	aof-miR5139a_L-2	AACCTGGCTCTGATACCA	down	0.880598	-0.183445	0.484275	73.36	64.6007	66.8146	68.8899	84.3755	66.6067	80.1596	47.0358	63	68.6667	88	67.3333	83.3333	47.3333	middle
751	aof-miR5139b_L-3	AACCTGGCTCTGATACCA	down	0.880598	-0.183445	0.484275	73.36	64.6007	66.8146	68.8899	84.3755	66.6067	80.1596	47.0358	63	68.6667	88	67.3333	83.3333	47.3333	middle
752	PC-5p-82761_70	ACTCGAACTCTTCAAAAATGCTGT	down	0.69593	-0.522986	0.484829	15.8201	11.0097	18.0293	15.0488	14.3822	22.2572	4.80957	5.96228	17	15	15	22.5	5	6	middle
753	PC-3p-205081_23	AAGGTATAGCGCGATGAATAACCC	up	2.13621	1.09505	0.485969	1.23731	2.64315	3.71192	0	0	4.45144	0	3.478	3.5	0	0	4.5	0	3.5	low
754	ath-miR169a-3p_L+1_1ss9TG	TGGCAAGTGGTCCTTGGCTAC	up	1.41747	0.503315	0.486975	11.816	16.7488	5.30275	9.53089	20.6145	25.2248	9.61915	15.4026	5	9.5	21.5	25.5	10	15.5	middle
755	PC-3p-157219_33	TCGCGTCTTCCTTTTCACACG	up	1.51714	0.601352	0.487286	5.60283	8.50027	5.30275	0	11.5058	10.8813	8.65723	5.96228	5	0	12	11	9	6	middle
756	PC-5p-86158_67	AATCCTGTAATGAGCGCAAACTCT	up	1.92198	0.942593	0.487946	10.1003	19.4126	0	13.0423	17.2586	10.8813	40.4004	6.956	0	13	18	11	42	7	middle
757	PC-5p-75336_77	TCAGTGATCTTTTCTCCATGTAAT	down	0.816757	-0.292021	0.488653	26.1683	21.3731	23.3321	22.5732	32.5996	27.6978	25.4907	10.9309	22	22.5	34	28	26.5	11	middle
758	cst-MIR11334-p5_2ss8TG17TC	AAGGAGTGTGTAACAACT	down	0.463515	-1.10931	0.492469	3.45877	1.60319	6.36329	4.01301	0	0	4.80957	0	6	4	0	0	5	0	low
759	PC-5p-89536_65	TTGCTTTATATTCTTGATTTC	down	0.5333	-0.906982	0.492586	11.7241	6.25245	8.48439	18.0585	8.62931	0	18.7573	0	8	18	9	0	19.5	0	middle
760	nta-MIR159-p5	AGCTGCTGACCTATGGATTCC	up	1.13686	0.18505	0.495023	1474.08	1675.82	1159.18	1325.3	1937.76	1863.67	1629.48	1534.29	1093	1321	2021	1884	1694	1544	high
761	PC-3p-177377_28	ACGTTTTAACTTGTGCCCCTTTGC	down	0.48038	-1.05775	0.495629	6.2058	2.98114	0	9.02926	9.58813	0	0	8.94342	0	9	10	0	0	9	low
762	PC-5p-351929_10	AACTGGTGAACTTCAGCTCTAGGT	down	0.481497	-1.0544	0.496901	3.43967	1.65619	5.30275	5.01626	0	0	0	4.96857	5	5	0	0	0	5	low
763	PC-3p-234711_19	AGCGTGGGGGACATGTGGAATACC	up	2.14233	1.09918	0.497001	2.0065	4.29858	0	6.01951	0	4.94604	0	7.94971	0	6	0	5	0	8	low
764	osa-miR5083_L+1R+2	CAGACTACAATTATCTGATCAAT	down	0.824892	-0.277723	0.49739	146.366	120.736	114.539	205.667	118.893	110.791	150.059	101.359	108	205	124	112	156	102	middle
765	gma-miR403a_1ss21GT	TTAGATTCACGCACAAACTTT	down	0.763896	-0.388551	0.498107	79.1446	60.4582	82.7228	94.3056	60.4052	25.7194	101.001	54.6543	78	94	63	26	105	55	middle
766	PC-3p-432909_7	AATGTCTCGTACAACTAGTGTCAG	down	0.472379	-1.08198	0.500756	4.07264	1.92383	7.42384	0	4.79406	0	5.77149	0	7	0	5	0	6	0	low
767	PC-3p-148531_36	AAAGCTTAGCCCAATAACTCCACA	up	1.81324	0.858572	0.502821	2.07743	3.76688	0	0	6.23228	3.46223	3.3667	4.47171	0	0	6.5	3.5	3.5	4.5	low
768	nta-miR479b	CGTGATATTTGTTTGGCTCATC	up	2.06751	1.0479	0.503935	2.55683	5.28629	0	0	7.6705	8.90287	0	6.956	0	0	8	9	0	7	low
769	ptc-miR167e_R+1	TGAAGCTGCCAGCATGATCTGC	down	0.892134	-0.164668	0.504167	48.9354	43.6569	50.3761	55.6805	40.7495	53.4172	43.7671	33.7863	47.5	55.5	42.5	54	45.5	34	middle
770	stu-MIR6026-p3_1ss11AC	CTAGAGTTGTCTTGCCAAGTC	up	1.17094	0.227671	0.50608	4.74245	5.55314	5.83302	5.51788	2.87644	5.93525	6.25245	4.47171	5.5	5.5	3	6	6.5	4.5	low
771	PC-5p-42349_136	TTATACCTTGTTTGATTGGAG	up	1.23237	0.30143	0.506682	10.9709	13.5201	14.3174	8.52764	10.0675	9.39748	19.2383	11.9246	13.5	8.5	10.5	9.5	20	12	middle
772	PC-3p-359533_10	CCAGAGTACCGACTGCGAGTT	up	2.03964	1.02831	0.5071	1.59802	3.25938	0	0	4.79406	0	4.80957	4.96857	0	0	5	0	5	5	low
773	PC-5p-113091_50	ATTGTCCGCTTTAGGCCTAGGTCC	down	0.706126	-0.502003	0.509859	9.67742	6.83348	9.54494	7.02276	12.4646	10.8813	9.61915	0	9	7	13	11	10	0	middle
774	PC-5p-17749_272	TGGTTGAGTAGAATTGTAGGGT	up	1.30038	0.37893	0.510151	20.5349	26.7031	20.6807	25.5829	15.341	14.8381	24.5288	40.7423	19.5	25.5	16	15	25.5	41	middle
775	PC-3p-5681_544	ACCCCTTGCCTCTTCGATGTG	up	1.16729	0.223158	0.510165	42.7486	49.8999	50.3761	37.1203	40.7495	54.4065	33.1861	62.1071	47.5	37	42.5	55	34.5	62.5	middle
776	ath-miR8175_L+4_1ss6AG	GTTCGGTCCCCGGCAACGGCGCCA	up	2.02538	1.01819	0.512792	1.76758	3.58002	5.30275	0	0	0	5.77149	4.96857	5	0	0	0	6	5	low
777	PC-3p-340575_11	CTTTCTACCATACTATTTATTC	down	0.520408	-0.942286	0.514399	3.12435	1.62594	6.36329	3.00975	0	2.47302	2.40479	0	6	3	0	2.5	2.5	0	low
778	PC-5p-81067_72	TGAGTTCGTGGAAATCACCTGC	up	1.15029	0.201991	0.515042	5.54886	6.38278	5.83302	6.01951	4.79406	8.40827	5.77149	4.96857	5.5	6	5	8.5	6	5	low
779	PC-3p-238241_18	AATGGTCAAGGGGTTCAAAACTTT	up	2.04516	1.03222	0.515535	1.91763	3.92186	0	0	5.75288	0	4.80957	6.956	0	0	6	0	5	7	low
780	ptc-miR162a_R+1_1	TCGATAAACCTCTGCATCCAGA	up	1.12424	0.168956	0.515615	28.1313	31.6265	21.7413	29.0943	33.5584	37.5899	25.4907	31.7988	20.5	29	35	38	26.5	32	middle
781	tcc-miR162_R+1	TCGATAAACCTCTGCATCCAGA	up	1.12424	0.168956	0.515615	28.1313	31.6265	21.7413	29.0943	33.5584	37.5899	25.4907	31.7988	20.5	29	35	38	26.5	32	middle
782	nta-MIR6153-p3	GTAGTGAAAATGGTTCTAAAT	down	0.719535	-0.474863	0.516064	25.2095	18.1391	24.3926	31.1008	20.1351	11.8705	35.5908	6.956	23	31	21	12	37	7	middle
783	nta-miR482b-5p	AGTGGGTGGAGTGGTAAGATA	down	0.906101	-0.142257	0.517257	23.4294	21.2294	23.3321	21.0683	25.8879	23.741	24.0479	15.8994	22	21	27	24	25	16	middle
784	osa-miR160e-5p	TGCCTGGCTCCCTGTATGCCG	up	1.81959	0.86361	0.518509	5.60283	10.1948	5.30275	0	11.5058	7.41906	20.6812	2.48428	5	0	12	7.5	21.5	2.5	middle
785	PC-3p-141774_38	TTTAATATCATTAATCATAAGGGT	up	1.82568	0.868435	0.519289	2.22146	4.05568	2.65137	4.01301	0	0	7.69532	4.47171	2.5	4	0	0	8	4.5	low
786	ptc-miR6478_R-2	CCGACCTTAGCTCAGTTGG	down	0.852955	-0.229458	0.52194	13.9785	11.923	13.7871	18.5602	9.58813	12.3651	13.4668	9.93714	13	18.5	10	12.5	14	10	middle
787	gma-miR166a-3p_1ss17TC	TCGGACCAGGCTTCATCCCCC	up	1.04042	0.0571726	0.522153	277.963	289.199	263.016	289.94	280.932	314.568	284.727	268.303	248	289	293	318	296	270	middle
788	PC-5p-47067_123	ACCGTCCATTTGATTGCTGCATCC	down	0.827181	-0.273725	0.524037	73.5513	60.8403	53.0275	61.1983	106.428	60.3417	61.5625	60.6165	50	61	111	61	64	61	middle
789	nta-MIR6152a-p5	AGATTATTGTATTCGACTGTATTC	up	1.13351	0.180794	0.526861	215.524	244.299	159.082	204.162	283.329	277.473	231.34	224.082	150	203.5	295.5	280.5	240.5	225.5	middle
790	mes-MIR319g-p5	ATCTGCCGACTCATTCATTCA	up	4.25577	2.08942	0.527268	1.27842	5.44065	0	0	3.83525	16.3219	0	0	0	0	4	16.5	0	0	middle
791	gma-miR2111a_2ss2TC21GC	GCCCTTGGGATGCAGATTACC	up	1.28157	0.357917	0.529499	11.0471	14.1576	14.8477	12.5406	5.75288	11.8705	21.1621	9.44028	14	12.5	6	12	22	9.5	middle
792	PC-5p-24038_217	TGTTTGCTTGTTCCCCGGTTT	down	0.899676	-0.152523	0.53026	26.2414	23.6087	24.9229	24.078	29.7232	29.1816	17.7954	23.8491	23.5	24	31	29.5	18.5	24	middle
793	mtr-miR159a_L+1	CTTTGGATTGAAGGGAGCTCTA	down	0.910185	-0.135769	0.530515	323.301	294.263	380.207	336.089	253.606	313.579	261.16	308.051	358.5	335	264.5	317	271.5	310	middle
794	nta-miR390b	AAGCTCAGGAGGGATAGCGCC	up	1.33262	0.414268	0.530551	549.909	732.82	450.733	660.14	538.853	390.737	1197.58	610.14	425	658	562	395	1245	614	middle
795	PC-5p-342411_11	ATGCCGCTGCCGTTACACATTTGG	down	0.507181	-0.979429	0.531031	3.79318	1.92383	6.36329	5.01626	0	0	5.77149	0	6	5	0	0	6	0	low
796	PC-5p-306315_12	TAATAATTGACTGCATAGCGC	down	0.507181	-0.979429	0.531031	3.79318	1.92383	6.36329	5.01626	0	0	5.77149	0	6	5	0	0	6	0	low
797	PC-3p-322135_11	TGTATCCTGCATCTTCTCTTT	down	0.509747	-0.972146	0.53122	1.88704	0.961915	2.65137	3.00975	0	0	2.88574	0	2.5	3	0	0	3	0	low
798	PC-3p-159703_33	AATCACATGTAATAGGCTGGATCC	down	0.681178	-0.553896	0.531483	9.45916	6.44337	4.2422	14.5471	9.58813	10.3867	0	8.94342	4	14.5	10	10.5	0	9	middle
799	osa-MIR169e-p5_2ss15AG22GC	TGTAGCCAAGGATGGCTTGCCC	up	1.33174	0.413308	0.532355	10.8202	14.4096	5.30275	7.02276	20.1351	17.8057	12.5049	12.9183	5	7	21	18	13	13	middle
800	PC-5p-52359_111	TGTATGTTGCTTTTCTTGCCGA	up	1.37275	0.45707	0.533609	16.3848	22.4923	8.48439	9.02926	31.6408	22.7518	29.8194	14.9057	8	9	33	23	31	15	middle
801	PC-5p-145561_37	AAATTCTGAGTTGTTAGGGCC	down	0.5932	-0.75341	0.536511	3.84501	2.28086	5.30275	0	6.23228	3.95683	2.88574	0	5	0	6.5	4	3	0	low
802	nta-miR168a	TCGCTTGGTGCAGGTCGGGAC	down	0.936031	-0.0953716	0.537499	1225.67	1147.26	1134.5	1261.57	1280.93	1077.64	1348.14	1016.01	1069.73	1257.48	1335.95	1089.4	1401.52	1022.43	middle
803	ptc-miR166a_L+3_1ss23CT	CTCTCGGACCAGGCTTCATTCCTC	up	1.95325	0.965878	0.538253	1.33767	2.6128	0	4.01301	0	0	3.3667	4.47171	0	4	0	0	3.5	4.5	low
804	PC-3p-48277_120	ATACCTCATACAACTAGTGTCAGT	up	1.37475	0.459168	0.538631	18.9226	26.0138	9.54494	27.0878	20.1351	38.5791	8.65723	30.8051	9	27	21	39	9	31	middle
805	PC-5p-182569_27	ACCAACCCGGCCTATGTACACCCT	up	1.94178	0.957377	0.538931	3.00975	5.84427	0	9.02926	0	7.91367	9.61915	0	0	9	0	8	10	0	low
806	PC-5p-119955_47	ACCACCCCTATACCTTCTTACACC	up	1.20152	0.264866	0.541716	7.09096	8.51997	9.54494	5.01626	6.71169	11.8705	6.7334	6.956	9	5	7	12	7	7	middle
807	nta-miR398_L+2R-2	TATGTGTTCTCAGGTCGCCCC	down	0.821186	-0.284219	0.544289	484.862	398.162	685.115	487.58	281.891	336.331	373.223	484.932	646	486	294	340	388	488	middle
808	PC-5p-222597_20	AAATCTATGTTGCTCGAACTCTCC	up	1.92004	0.94114	0.544746	1.11861	2.14779	0	0	3.35584	3.46223	0	2.98114	0	0	3.5	3.5	0	3	low
809	stu-miR6026-3p_L-1_1ss18AC	TCTTGGCTAGAGTTGTCTTGC	up	1.11707	0.159722	0.546525	1536.46	1716.34	1667.18	1333.32	1608.89	1510.03	1442.39	2196.6	1572	1329	1678	1526.5	1499.5	2210.5	high
810	nta-MIR319a-p5	TTGCTGCCGACTCATTCATCCA	up	2.83403	1.50286	0.547315	20.6683	58.5747	0	36.1171	25.8879	163.219	12.5049	0	0	36	27	165	13	0	middle
811	PC-3p-184369_27	ACGTCCGGGCGTTCGGGGCATACG	down	0.581966	-0.780994	0.547346	5.69171	3.31238	5.30275	6.01951	5.75288	0	0	9.93714	5	6	6	0	0	10	low
812	sly-miR391_2ss10AG17GA	ACGCAGGAGGGATGATACTGGA	up	1.14216	0.19177	0.548425	29.6972	33.9191	37.1192	26.0845	25.8879	27.6978	44.2481	29.8114	35	26	27	28	46	30	middle
813	PC-3p-31383_176	TTTTCTGAAACTTAGTTCCCC	down	0.82129	-0.284037	0.549478	48.6019	39.9163	72.1173	40.1301	33.5584	32.6439	40.4004	46.7045	68	40	35	33	42	47	middle
814	gma-miR5368_L+4	CAAGGGACAGTCTCAGGTAGACA	down	0.624255	-0.679794	0.550221	13.1806	8.22808	16.9688	22.5732	0	10.3867	3.3667	10.9309	16	22.5	0	10.5	3.5	11	middle
815	PC-5p-278117_14	ACAAATCACACCAACCCGATGATC	up	3.56053	1.83209	0.55168	1.76758	6.29352	5.30275	0	0	0	0	18.8806	5	0	0	0	0	19	middle
816	stu-miR398b-3p_L-1R+1	TGTGTTCTCAGGTCACCCCTT	up	1.14779	0.198861	0.552653	53.5963	61.5174	54.088	38.6252	68.0757	67.2662	44.2481	73.038	51	38.5	71	68	46	73.5	middle
817	nta-miR390a	AAGCTCAGGAGGGATAGCACC	up	1.58826	0.667444	0.553754	570.748	906.495	308.62	777.52	626.105	429.316	1843.99	446.177	291	775	653	434	1917	449	high
818	sly-miR319a_L-1R+2	TTGGACTGAAGGGAGCTCCTT	down	0.849979	-0.234501	0.554187	489.861	416.372	456.566	343.446	669.571	351.169	532.259	365.687	430.5	342.333	698.333	355	553.333	368	middle
819	PC-3p-77476_75	AAAAAGAGGCCTCACACAACTAGC	up	1.25537	0.328115	0.558342	5.47051	6.86753	4.77247	3.00975	8.62931	9.39748	6.7334	4.47171	4.5	3	9	9.5	7	4.5	low
820	ath-miR829-3p.1_2ss15AT23AT	AGCTCTGATACCAATTGATGGATT	down	0.888304	-0.170875	0.558363	3.49988	3.10895	2.65137	4.01301	3.83525	3.95683	2.88574	2.48428	2.5	4	4	4	3	2.5	low
821	csi-miR156i-5p_L+4_1ss20TG	GATCTTGACAGAAGATAGAGAGCAC	up	1.7449	0.803146	0.558898	7.70231	13.4398	2.65137	18.0585	2.39703	2.96762	27.4146	9.93714	2.5	18	2.5	3	28.5	10	middle
822	PC-5p-2229_913	TAGCACTGCGTTATAGATTTTT	up	1.17363	0.230976	0.560289	179.417	210.569	119.842	224.728	193.68	136.511	260.679	234.516	113	224	202	138	271	236	middle
823	stu-miR166a-3p_L+3R+1	ATTTCGGACCAGGCTTCATTCCCCT	down	0.531958	-0.910615	0.561528	3.71912	1.97842	6.36329	0	4.79406	5.93525	0	0	6	0	5	6	0	0	low
824	PC-3p-188930_26	ATGGATGGGCCAAATGTGTAACGG	down	0.536971	-0.897084	0.56275	5.55178	2.98114	0	8.02601	8.62931	0	0	8.94342	0	8	9	0	0	9	low
825	PC-3p-222319_20	TCTTGTTCAGTTGTTACCCTCTTC	up	1.71665	0.779598	0.563568	2.56659	4.40595	5.30275	0	2.39703	8.40827	4.80957	0	5	0	2.5	8.5	5	0	low
826	nta-miR390a_R+1	AAGCTCAGGAGGGATAGCACCT	up	1.38173	0.466477	0.563615	8.57148	11.8435	9.01467	9.02926	7.6705	8.90287	21.1621	5.46543	8.5	9	8	9	22	5.5	middle
827	PC-3p-88035_66	ATCCAAGGCCTTTCATTTTTCTAT	up	1.38056	0.465252	0.564206	19.2153	26.5278	21.211	0	36.4349	31.6547	23.086	24.8428	20	0	38	32	24	25	middle
828	nta-miR169q_R-1_1ss7AG	CAGCCAGGGATGACTTGCCG	up	1.56614	0.647214	0.565202	1.34735	2.11014	0	1.57654	2.46552	0.706577	1.649	3.97486	0	1.57143	2.57143	0.714286	1.71429	4	low
829	PC-3p-333352_11	AAACTTCAGAACGTCGTGTCCTGA	down	0.539299	-0.890843	0.565595	3.68521	1.98743	5.30275	0	5.75288	0	0	5.96228	5	0	6	0	0	6	low
830	nta-MIR408-p5	ACAGGGACGAGGTAGAGCATG	down	0.800612	-0.320824	0.568026	111.278	89.0904	164.385	102.332	67.1169	55.3957	83.6866	128.189	155	102	70	56	87	129	middle
831	nta-miR6146a	TTTGTCCAATGAAACACTTATC	down	0.764765	-0.386912	0.56978	1508.59	1153.72	1688.92	1887.62	949.225	522.302	2106.11	832.732	1592.5	1881.5	990	528	2189.5	838	high
832	PC-3p-265633_15	ATCCCGTCCCGTCCCGCCTATCCC	up	1.83973	0.879493	0.570278	1.76758	3.25187	5.30275	0	0	4.94604	4.80957	0	5	0	0	5	5	0	low
833	ptc-miR156l_R+2_1ss13GA	TTGACAGAAGATAGAGAGCACAT	down	0.652625	-0.615673	0.572671	10.1136	6.60038	12.7266	8.02601	9.58813	2.96762	16.8335	0	12	8	10	3	17.5	0	middle
834	sly-miR168b-3p_R+1	CCCGCCTTGCATCAACTGAATA	down	0.544333	-0.877439	0.576669	6.66338	3.6271	8.48439	0	11.5058	10.8813	0	0	8	0	12	11	0	0	middle
835	nta-miR167d	TGAAGCTGCCAGCATGATCTA	down	0.917702	-0.123902	0.582997	12596.3	11559.6	14603.8	10764.1	12420.9	12770.2	8903.24	13005.5	13770	10729.2	12954.5	12909.5	9255.75	13087.8	high
836	fve-MIR171g-p5	TGATGTTGGAATGGCTCAATC	down	0.865399	-0.208563	0.583045	40.8394	35.3424	48.7853	41.1333	32.5996	33.6331	49.5386	22.8554	46	41	34	34	51.5	23	middle
837	nta-miR319a_R-1	TTGGACTGAAGGGAGCTCCC	down	0.849891	-0.23465	0.583124	1610.28	1368.56	1032.97	1515.41	2282.45	1441.28	1540.03	1124.39	974	1510.5	2380.5	1457	1601	1131.5	high
838	PC-5p-80817_72	TTTCCCCCTTCATTTCTATCC	up	1.44667	0.53274	0.583207	12.0651	17.4543	13.7871	8.02601	14.3822	10.8813	7.69532	33.7863	13	8	15	11	8	34	middle
839	PC-5p-226746_20	AGAAATCATGCCTGCTAAGTC	down	0.80938	-0.305111	0.58442	3.63746	2.94409	2.65137	2.50813	5.75288	3.46223	2.88574	2.48428	2.5	2.5	6	3.5	3	2.5	low
840	gra-MIR166d-p3	CGGACCAGGCTTCATTCCCA	down	0.747396	-0.420056	0.584648	3.03957	2.27176	3.71192	3.00975	2.39703	2.96762	3.84766	0	3.5	3	2.5	3	4	0	low
841	nta-miR6020a-5p	AAATGTTTTTCGAGTATCTTC	down	0.811512	-0.301316	0.585375	318.188	258.214	321.346	420.362	212.856	145.414	414.585	214.642	303	419	222	147	431	216	middle
842	PC-3p-88797_65	ATTTGAGTGCGACAGGGTGGGTGT	up	1.19311	0.254724	0.585463	4.9383	5.89193	7.42384	4.51463	2.87644	4.45144	5.77149	7.45285	7	4.5	3	4.5	6	7.5	low
843	PC-5p-252812_17	AACATCCCTTAACTTTTCCAAACT	up	1.78949	0.839549	0.590881	2.0065	3.59062	0	6.01951	0	0	4.80957	5.96228	0	6	0	0	5	6	low
844	PC-3p-247748_17	AAACTTGAAGTTCTGCCCATGAAG	up	1.78949	0.839549	0.590881	2.0065	3.59062	0	6.01951	0	0	4.80957	5.96228	0	6	0	0	5	6	low
845	aof-MIR5139b-p5_2ss19GT24CA	AACCTGGCTCTGATACCATTGATA	up	1.34669	0.42942	0.591831	4.87048	6.55904	5.30275	4.51463	4.79406	11.8705	4.32862	3.478	5	4.5	5	12	4.5	3.5	middle
846	PC-5p-323417_11	TGATGAGTTAGGGCTAAGGTC	up	2.8425	1.50716	0.592162	0.958813	2.72542	0	0	2.87644	0	8.17627	0	0	0	3	0	8.5	0	low
847	PC-3p-342445_11	AAGAAGCCTCACACAACTTGCGTC	up	1.785	0.835924	0.592415	2.0065	3.58161	0	6.01951	0	5.93525	4.80957	0	0	6	0	6	5	0	low
848	nta-miR6145c_L+1	CCAGTGCACATATAACAGTAA	up	1.71239	0.776008	0.593213	10.7968	18.4884	5.30275	27.0878	0	0	35.5908	19.8743	5	27	0	0	37	20	middle
849	cas-MIR11592-p3_2ss22AC24CG	AACCGAACCGAACCGAACCGACCG	up	1.80326	0.85061	0.593795	1.17046	2.11065	0	3.51138	0	0	3.84766	2.48428	0	3.5	0	0	4	2.5	low
850	cas-MIR11592-p5_2ss22AC24CG	AACCGAACCGAACCGAACCGACCG	up	1.80326	0.85061	0.593795	1.17046	2.11065	0	3.51138	0	0	3.84766	2.48428	0	3.5	0	0	4	2.5	low
851	PC-5p-15806_294	TTTGTATGCCCCATCCGAGTTATT	up	1.1076	0.147441	0.594025	141.806	157.064	126.205	174.566	124.646	152.338	124.087	194.768	119	174	130	154	129	196	middle
852	PC-5p-103969_55	TGAGCAGTCCAATAAAAAGAA	up	1.1825	0.241842	0.594766	4.14863	4.90576	3.18165	3.51138	5.75288	2.96762	5.29053	6.45914	3	3.5	6	3	5.5	6.5	low
853	PC-5p-2832_791	TTGTGATATGGAGCACTAGCC	up	1.11747	0.160232	0.598656	102.265	114.278	103.934	109.856	93.0048	92.9856	152.463	97.384	98	109.5	97	94	158.5	98	middle
854	PC-5p-17212_277	ATACTTTGTCTATCGGACTGC	down	0.864983	-0.209257	0.600171	163.638	141.544	162.264	146.475	182.174	211.691	111.582	101.359	153	146	190	214	116	102	middle
855	PC-5p-263846_16	TTGTTCTGACAATGTCTTGGA	up	1.58631	0.665677	0.601155	3.28082	5.20441	2.65137	0	7.19109	0	8.65723	6.956	2.5	0	7.5	0	9	7	low
856	nta-MIR6146a-p3	TCAGTGTTCACTGGACAAAGA	down	0.745631	-0.423466	0.601499	126.469	94.2994	136.811	173.563	69.0345	29.6762	185.65	67.5725	129	173	72	30	193	68	middle
857	stu-miR7122-5p_1ss18TG	TTATACAGAGAAACCGCGGTCG	up	1.07076	0.0986354	0.604895	6091.22	6522.23	5222.67	5608.68	7442.3	7061.96	6241.86	6262.88	4924.5	5590.5	7762	7139	6489	6302.5	high
858	PC-3p-95770_60	AGAGTCCAAGCAACATAGAGC	down	0.815426	-0.294373	0.605359	12.0585	9.83282	8.48439	19.0618	8.62931	12.8597	7.69532	8.94342	8	19	9	13	8	9	middle
859	PC-3p-161793_32	CTAATGCTCATGTTACAATTC	down	0.554687	-0.850255	0.606641	3.46832	1.92383	6.89357	3.51138	0	0	5.77149	0	6.5	3.5	0	0	6	0	low
860	mtr-MIR7696b-p3_2ss6GC17AG	TTTTTCAATTATGAGAGCT	down	0.848154	-0.237602	0.607447	8.45805	7.17373	4.77247	10.5341	10.0675	4.94604	9.61915	6.956	4.5	10.5	10.5	5	10	7	middle
861	mtr-MIR7696b-p5_2ss6GC17AG	TTTTTCAATTATGAGAGCT	down	0.848154	-0.237602	0.607447	8.45805	7.17373	4.77247	10.5341	10.0675	4.94604	9.61915	6.956	4.5	10.5	10.5	5	10	7	middle
862	gma-miR171e_L+2	AATGATTGAGCCGTGCCAATATC	up	1.37605	0.460535	0.610858	22.8411	31.4305	24.9229	21.0683	22.5321	18.3004	15.8716	60.1197	23.5	21	23.5	18.5	16.5	60.5	middle
863	bdi-miR160f_L+2	CATGCCTGGCTCCCTGTATGCC	up	2.60841	1.38317	0.611174	0.799011	2.08415	0	0	2.39703	0	6.25245	0	0	0	2.5	0	6.5	0	low
864	mtr-miR171e-5p	CGATGTTGGTGAGGTTCAATC	down	0.900033	-0.15195	0.611608	24.693	22.2246	23.3321	20.065	30.682	15.8273	25.0098	25.8366	22	20	32	16	26	26	middle
865	PC-5p-138111_39	CCTCAAAAGATCAACGACATC	down	0.737341	-0.439596	0.612578	7.4932	5.52505	11.666	6.01951	4.79406	0	9.61915	6.956	11	6	5	0	10	7	middle
866	PC-3p-166145_31	ATTATGAGGTGGACTGGGCTGGCC	up	1.41144	0.497169	0.612977	6.74797	9.52437	7.42384	8.02601	4.79406	18.795	4.80957	4.96857	7	8	5	19	5	5	middle
867	nta-miR6021	TTGGAAGAGGCTGCTATTGGA	down	0.941177	-0.0874625	0.613364	24566.3	23121.3	28029.3	22740.7	22929	23900.3	19354.7	26108.8	26429	22667	23914	24161	20121	26274	high
868	PC-3p-175758_29	TTTTTCTCCGTTAGGTTGTTCATC	up	1.52806	0.611699	0.615179	3.34962	5.11842	3.18165	3.51138	3.35584	10.3867	0	4.96857	3	3.5	3.5	10.5	0	5	middle
869	PC-3p-166636_31	AAGACACCACTGTTACGCGGCGCC	down	0.609071	-0.715318	0.617321	4.35073	2.6499	2.65137	7.52439	2.87644	0	0	7.94971	2.5	7.5	3	0	0	8	low
870	rgl-miR7972_L+1_2ss15TG22CT	TTTGTCAGGCTTGTGATTCTCT	down	0.762474	-0.39124	0.617727	6.88535	5.2499	2.65137	6.01951	11.9852	4.94604	3.84766	6.956	2.5	6	12.5	5	4	7	middle
871	stu-MIR5303d-p5_1ss7TC	TCGGATCCTCCAAAAATACACT	down	0.669031	-0.579855	0.61831	5.35105	3.58002	7.42384	0	8.62931	0	5.77149	4.96857	7	0	9	0	6	5	low
872	nta-miR166a	TCGGACCAGGCTTCATTCCCC	up	1.03245	0.0460715	0.618473	112013	115648	116437	105187	114415	124418	105071	117454	109789	104846	119330	125775	109231	118197	high
873	PC-3p-177686_28	ATATATGACTTGAACCCGCACGCT	up	1.19977	0.262754	0.620835	5.69814	6.83644	6.89357	3.00975	7.19109	5.44065	10.1001	4.96857	6.5	3	7.5	5.5	10.5	5	middle
874	stu-miR167a-5p_L+2	AATGAAGCTGCCAGCATGATCTA	up	1.17593	0.233796	0.622071	54.0855	63.6005	60.4513	47.1528	54.6523	88.0395	32.7051	70.0568	57	47	57	89	34	70.5	middle
875	stu-MIR5303i-p5_2ss13TG24GA	AAAAATGTTGTCGCACCCGTGTCA	down	0.562651	-0.829687	0.622704	4.12096	2.31867	0	8.52764	3.83525	0	0	6.956	0	8.5	4	0	0	7	low
876	PC-3p-158481_33	TGATTGTCCTCTATATATTCC	down	0.696675	-0.521442	0.6228	4.23244	2.94863	7.42384	0	5.27347	3.95683	2.40479	2.48428	7	0	5.5	4	2.5	2.5	low
877	stu-MIR5303i-p5_1ss13TG	AAAAATGTTGTCGCACCCGTGTCG	up	1.17743	0.235641	0.623426	3.48506	4.10342	2.65137	3.00975	4.79406	3.46223	2.88574	5.96228	2.5	3	5	3.5	3	6	low
878	osa-miR5072_L-4_1ss13GA	TCCCCAGCAGAGTCGCCA	down	0.890351	-0.167554	0.62379	42.0901	37.475	45.6036	46.1496	34.5173	36.6007	50.9815	24.8428	43	46	36	37	53	25	middle
879	osa-miR530-5p_R+1_1ss20AC_2	TGCATTTGCACCTGCACCTCT	down	0.869867	-0.201134	0.624899	15.2865	13.2972	12.7266	12.039	21.0939	14.8381	8.65723	16.3963	12	12	22	15	9	16.5	middle
880	osa-miR530-5p_R+1_1ss20AC_1	TGCATTTGCACCTGCACCTCC	down	0.869867	-0.201134	0.624899	15.2865	13.2972	12.7266	12.039	21.0939	14.8381	8.65723	16.3963	12	12	22	15	9	16.5	middle
881	PC-5p-358284_10	AATTATTTCTGATAGGCCCTCAGC	down	0.590512	-0.759963	0.625879	3.3656	1.98743	5.30275	0	4.79406	0	0	5.96228	5	0	5	0	0	6	low
882	osa-miR5077_L-1_1ss5GA	TTCACGTCGGGTTCACCA	down	0.923939	-0.11413	0.628368	247.137	228.34	267.258	227.738	246.415	287.86	220.278	176.881	252	227	257	291	229	178	middle
883	ptc-miR169a_R+3	CAGCCAAGGATGACTTGCCGACTC	down	0.711299	-0.491472	0.628849	6.19839	4.40891	0	8.52764	10.0675	2.96762	5.29053	4.96857	0	8.5	10.5	3	5.5	5	middle
884	PC-5p-254701_16	ATAATACGCACGCCGCGCGGGGC	down	0.412271	-1.27833	0.629054	3.88868	1.60319	11.666	0	0	0	4.80957	0	11	0	0	0	5	0	middle
885	PC-5p-202224_23	TTATTTTAGTTTCGGGAAAGTACT	down	0.588792	-0.764169	0.629287	2.99513	1.76351	3.71192	0	5.27347	0	5.29053	0	3.5	0	5.5	0	5.5	0	low
886	PC-5p-281501_14	TTTTGCCCCTGGAACATAGGT	down	0.590424	-0.760177	0.629349	3.90932	2.30815	0	5.01626	6.71169	6.92446	0	0	0	5	7	7	0	0	low
887	PC-3p-313278_12	ATCGAAACCAAATCAACCCGACAT	up	2.40776	1.26769	0.630967	1.59802	3.84766	0	0	4.79406	0	11.543	0	0	0	5	0	12	0	middle
888	PC-3p-75618_77	TGTTCTTCAGCTGCAAGTTCT	down	0.825177	-0.277224	0.632459	23.0124	18.9893	21.211	19.0618	28.7644	6.92446	19.2383	30.8051	20	19	30	7	20	31	middle
889	nta-MIR6154a-p5	CCTTACTCCAGGTAGATCCACC	up	1.29515	0.373114	0.634228	53.9362	69.8552	38.1798	85.2764	38.3525	30.6655	119.277	59.6228	36	85	40	31	124	60	middle
890	stu-miR393-5p_R-1	TCCAAAGGGATCGCATTGATC	down	0.835059	-0.26005	0.634587	52.6124	43.9345	62.0421	52.1691	43.626	16.3219	68.7769	46.7045	58.5	52	45.5	16.5	71.5	47	middle
891	PC-3p-266108_15	AAACCTGCCCCGCACCCGCACCCG	up	2.35242	1.23415	0.637122	2.67534	6.29352	0	8.02601	0	0	0	18.8806	0	8	0	0	0	19	middle
892	PC-5p-40405_141	TAGAGGCACTGTAACCGTAAG	down	0.844803	-0.243313	0.63878	43.0579	36.3755	57.2697	43.1398	28.7644	20.7734	32.7051	55.648	54	43	30	21	34	56	middle
893	nta-miR6153	TAGGACCATATTCACTATTTG	down	0.865146	-0.208984	0.640005	482.881	417.763	454.976	548.779	444.889	265.108	648.33	339.85	429	547	464	268	674	342	middle
894	ppe-miR394a_L+2	ATTTGGCATTCTGTCCACCTCC	up	1.45066	0.536713	0.641711	1.6828	2.44118	2.65137	0	2.39703	3.95683	3.3667	0	2.5	0	2.5	4	3.5	0	low
895	gma-MIR6300-p5_5	TATAGTGGTAAGTATTCCCGCC	down	0.595499	-0.747829	0.642918	7.13072	4.24634	0	17.5569	3.83525	4.45144	4.80957	3.478	0	17.5	4	4.5	5	3.5	middle
896	gma-MIR6300-p5_4	TAGTGGTAAGTATTCCCGCC	down	0.595499	-0.747829	0.642918	7.13072	4.24634	0	17.5569	3.83525	4.45144	4.80957	3.478	0	17.5	4	4.5	5	3.5	middle
897	gma-MIR6300-p5_6	TGTAGTATAGTGGTAAGTATTCCC	down	0.595499	-0.747829	0.642918	7.13072	4.24634	0	17.5569	3.83525	4.45144	4.80957	3.478	0	17.5	4	4.5	5	3.5	middle
898	gma-MIR6300-p5_3	GTGGTAAGTATTCCCGCC	down	0.595499	-0.747829	0.642918	7.13072	4.24634	0	17.5569	3.83525	4.45144	4.80957	3.478	0	17.5	4	4.5	5	3.5	middle
899	PC-5p-165209_31	TTTATTAAAGTTGTTCGCAGT	up	1.5449	0.627518	0.643023	4.01301	6.19971	0	12.039	0	5.93525	7.69532	4.96857	0	12	0	6	8	5	middle
900	aof-miR5139a_L+1R+3_1ss3AT	AGTAACCTGGCTCTGATACCAATT	up	1.64708	0.71991	0.644566	1.00325	1.65244	0	3.00975	0	2.47302	0	2.48428	0	3	0	2.5	0	2.5	low
901	PC-5p-448165_6	AGCTCATGCCCGAAAGTATTTACA	down	0.607756	-0.718436	0.645369	3.27011	1.98743	0	5.01626	4.79406	0	0	5.96228	0	5	5	0	0	6	low
902	PC-3p-3192_742	TTTGCCGGAATGAAATGAGTGTTT	up	1.09987	0.137339	0.645647	78.3504	86.1756	71.5871	86.2796	77.1844	58.8579	107.253	92.4154	67.5	86	80.5	59.5	111.5	93	middle
903	stu-miR1919-5p_R+2_1ss12AG	TGTCGCAGATGGCTTTCGCCCTT	up	2.26974	1.18253	0.646965	0.799011	1.81355	0	0	2.39703	5.44065	0	0	0	0	2.5	5.5	0	0	low
904	PC-3p-14364_314	AAAGTGGATAGAGGTAAAACTTGC	up	1.21223	0.277663	0.647102	53.9306	65.3762	53.5577	73.2374	34.9967	38.0845	103.887	54.1574	50.5	73	36.5	38.5	108	54.5	middle
905	PC-3p-79896_73	AGGAAAATCGTGCGGGTTTGGCCC	down	0.912744	-0.131717	0.647783	14.3869	13.1316	12.7266	16.052	14.3822	14.8381	8.65723	15.8994	12	16	15	15	9	16	middle
906	PC-5p-181700_27	TTGTAGTCCAAAAAGCTCCTAG	up	1.44974	0.53579	0.648033	3.60452	5.22561	0	6.01951	4.79406	0	6.7334	8.94342	0	6	5	0	7	9	low
907	PC-3p-145764_37	AGACTAATCTCTAAATAGCATCCC	up	1.32102	0.401651	0.648294	5.18773	6.85309	0	5.01626	10.5469	4.94604	8.65723	6.956	0	5	11	5	9	7	middle
908	PC-3p-252037_17	AGCTCTAGAACTGAAGTTTTTGAT	up	2.23856	1.16257	0.650895	1.76758	3.95683	5.30275	0	0	11.8705	0	0	5	0	0	12	0	0	middle
909	nta-miR171a	TATTGGTGCGGTTCAATGAGA	up	1.06481	0.0906008	0.651321	457.74	487.408	493.155	365.184	514.882	557.913	479.995	424.316	465	364	537	564	499	427	middle
910	PC-3p-212252_22	ATATGTGGATCTAGGATTTAAATT	up	1.63547	0.709703	0.652969	2.82813	4.62532	8.48439	0	0	7.91367	0	5.96228	8	0	0	8	0	6	low
911	ath-miR396b-5p_R+2_2	TTCCACAGCTTTCTTGAACTTTT	down	0.908983	-0.137675	0.654602	53.5445	48.671	55.1486	43.6414	61.8434	65.2877	37.9956	42.7297	52	43.5	64.5	66	39.5	43	middle
912	sly-miR396b_R+2	TTCCACAGCTTTCTTGAACTTTT	down	0.908983	-0.137675	0.654602	53.5445	48.671	55.1486	43.6414	61.8434	65.2877	37.9956	42.7297	52	43.5	64.5	66	39.5	43	middle
913	stu-miR156f-3p_L+2R-1_2ss22AC23TC	TGCTCACTTCTCTTTCTGTCACC	up	1.10585	0.145152	0.654718	737.816	815.912	832.531	751.937	628.981	767.626	593.982	1086.13	785	749.5	656	776	617.5	1093	middle
914	PC-3p-645365_5	AAAAGAGGCCTCACACAACTAAGT	down	0.453498	-1.14083	0.655256	1.76758	0.801596	5.30275	0	0	0	2.40479	0	5	0	0	0	2.5	0	low
915	sly-miR403-3p_2ss1CT17GA	TTAGATTCACGCACAAACTCG	down	0.860127	-0.217378	0.655443	2203.14	1894.98	2181.55	2837.2	1590.67	1244.92	2927.59	1512.43	2057	2828	1659	1258.5	3043.5	1522	high
916	stu-miR166b_R+1_1ss20TC	TCGGACCAGGCTTCATTCCCCA	down	0.947359	-0.0780175	0.65649	208.414	197.443	233.851	177.576	213.815	193.885	226.531	171.912	220.5	177	223	196	235.5	173	middle
917	PC-5p-504542_6	TGGGGCCCACTAGTTTTTCTT	up	2.1692	1.11717	0.660099	1.67209	3.6271	0	5.01626	0	10.8813	0	0	0	5	0	11	0	0	middle
918	PC-5p-148968_36	ATTGTGACATGAAGCACTAGCT	up	1.7444	0.802734	0.660586	3.59733	6.27519	4.77247	6.01951	0	2.47302	16.3525	0	4.5	6	0	2.5	17	0	middle
919	PC-3p-91516_63	TAATCATACTCCTCCATTTGCC	up	1.22448	0.292163	0.661143	9.34067	11.4374	5.30275	15.0488	7.6705	4.94604	13.4668	15.8994	5	15	8	5	14	16	middle
920	PC-3p-230828_19	ATAAAATCTGAACCAACCCGACCT	down	0.463032	-1.11082	0.661416	4.15485	1.92383	0	0	12.4646	0	5.77149	0	0	0	13	0	6	0	middle
921	PC-5p-116781_48	ATTTCATGTCACTGTCGTTACACA	up	1.14427	0.194432	0.661461	7.45501	8.53057	9.54494	8.02601	4.79406	11.8705	5.77149	7.94971	9	8	5	12	6	8	middle
922	sly-MIR396a-p5_1ss3GT	TTTTGTACTTTTCCACAGCTT	down	0.879542	-0.185175	0.661778	19.6787	17.3083	20.1504	12.039	26.8468	19.7842	19.7193	12.4214	19	12	28	20	20.5	12.5	middle
923	nta-miR482b-3p	TCTTGCCAATGCCATCCATTCC	up	1.06068	0.0849844	0.661862	5277.64	5597.87	4776.71	4916.94	6139.28	5573.2	4707.61	6512.8	4504	4901	6403	5634	4894	6554	high
924	mdm-miR535d	TGACGACGAGAGAGAGCACGC	up	1.32528	0.4063	0.661926	5.44617	7.21772	5.30275	11.0358	0	10.8813	4.80957	5.96228	5	11	0	11	5	6	middle
925	PC-3p-112822_50	CACGGGCGCAACAACACTTTT	up	1.28729	0.364342	0.662924	13.4543	17.3196	28.6348	5.01626	6.71169	15.8273	19.2383	16.8931	27	5	7	16	20	17	middle
926	PC-5p-265666_15	AGCCTTTGTGTCGTGAGTTCAAT	up	1.66055	0.731662	0.662988	3.18165	5.28329	9.54494	0	0	10.8813	0	4.96857	9	0	0	11	0	5	middle
927	nta-miR156f	TGACAGAAGAGAATGAGCAC	up	1.3244	0.405334	0.663913	88.0604	116.627	100.752	96.3121	67.1169	63.3093	228.936	57.6354	95	96	70	64	238	58	middle
928	PC-3p-244474_18	TCGAGTATCTGATGTGGCCAC	down	0.623445	-0.681666	0.666414	3.71912	2.31867	6.36329	0	4.79406	0	0	6.956	6	0	5	0	0	7	low
929	stu-miR166b_R+1	TCGGACCAGGCTTCATTCCTCT	down	0.973495	-0.0387551	0.671907	541.75	527.391	581.181	496.108	547.961	564.343	517.991	499.838	548	494.5	571.5	570.5	538.5	503	middle
930	gma-miR156b_L+1R-1	TTGACAGAAGAGAGAGAGCAC	up	1.58273	0.662414	0.672634	1.43822	2.27631	0	0	4.31466	3.46223	3.3667	0	0	0	4.5	3.5	3.5	0	low
931	mtr-miR319a-3p_R+1	TTGGACTGAAGGGAGCTCCCA	up	1.46086	0.54682	0.672863	2.76848	4.04437	0	3.51138	4.79406	3.95683	8.17627	0	0	3.5	5	4	8.5	0	low
932	PC-3p-117133_48	TGAAGGTAGTAGGTTAGCATT	down	0.74013	-0.434148	0.673277	9.15905	6.77889	13.7871	6.01951	7.6705	4.94604	15.3906	0	13	6	8	5	16	0	middle
933	PC-5p-173502_29	ATTATTTTCGCATCCTGGTAG	down	0.802099	-0.318147	0.673884	2.67865	2.14854	2.65137	2.50813	2.87644	2.96762	0	3.478	2.5	2.5	3	3	0	3.5	low
934	gma-miR403a_R-1	TTAGATTCACGCACAAACTT	down	0.793975	-0.332835	0.674507	15.5177	12.3206	23.3321	15.5504	7.6705	7.91367	23.086	5.96228	22	15.5	8	8	24	6	middle
935	ptc-miR169v_L+2R-1_1ss17TA	TGTAGCCAAGGATGACATGCCC	up	1.32718	0.408365	0.674961	54.0651	71.7541	28.6348	28.091	105.469	125.629	24.0479	65.5851	27	28	110	127	25	66	middle
936	PC-3p-110888_51	TTGGTACTCTTGGAAAGTCGT	up	1.21148	0.276775	0.676397	3.79726	4.60032	2.65137	2.50813	6.23228	6.92446	2.40479	4.47171	2.5	2.5	6.5	7	2.5	4.5	low
937	PC-3p-115032_49	TCAAAATCACCACCCTACCATA	up	1.31573	0.395867	0.676658	12.8162	16.8627	6.36329	10.0325	22.0527	14.8381	30.7813	4.96857	6	10	23	15	32	5	middle
938	PC-3p-220627_20	ATCGGCTCGATTATCGGTTTACCC	down	0.635128	-0.654881	0.676711	4.03872	2.56511	6.36329	0	5.75288	0	7.69532	0	6	0	6	0	8	0	low
939	PC-3p-110493_51	AAATCATAATGCAGTTCTAGC	down	0.800137	-0.321681	0.677664	9.34925	7.48068	7.42384	11.0358	9.58813	0	12.5049	9.93714	7	11	10	0	13	10	middle
940	PC-3p-87777_66	TTGTCCTAAGAGAGGTACCACATT	down	0.855768	-0.224709	0.679128	14.1605	12.1181	13.7871	20.065	8.62931	6.92446	11.543	17.8868	13	20	9	7	12	18	middle
941	stu-miR393-5p_R-1_1ss21CT	TCCAAAGGGATCGCATTGATT	down	0.857125	-0.222422	0.683985	24.8024	21.2588	31.2862	21.0683	22.0527	7.91367	23.5669	32.2957	29.5	21	23	8	24.5	32.5	middle
942	ptc-miR393a-5p_1ss21CT	TCCAAAGGGATCGCATTGATT	down	0.857125	-0.222422	0.683985	24.8024	21.2588	31.2862	21.0683	22.0527	7.91367	23.5669	32.2957	29.5	21	23	8	24.5	32.5	middle
943	PC-3p-193954_25	TCTCGGACGCGAACTTAGGAT	up	1.41997	0.505865	0.685188	5.28323	7.50205	5.30275	0	10.5469	13.8489	8.65723	0	5	0	11	14	9	0	middle
944	PC-5p-184462_27	AGAGATTGTAACACTCATATTGTT	up	1.40792	0.493562	0.686791	3.71912	5.23621	6.36329	0	4.79406	0	5.77149	9.93714	6	0	5	0	6	10	low
945	nta-MIR6160-p3_1ss12TC	AACTCTAAGGGCATATATGGACCA	up	1.03097	0.0440037	0.687711	935.85	964.834	883.437	1012.28	911.831	992.176	860.914	1041.41	833	1009	951	1003	895	1048	middle
946	PC-3p-282785_14	TGAGGGATAGAAGCTGGATCA	down	0.503887	-0.988828	0.688165	3.18165	1.60319	9.54494	0	0	0	4.80957	0	9	0	0	0	5	0	low
947	ptc-miR6478_R+4_1ss21GA	CCGACCTTAGCTCAGTTGGTAGAGC	down	0.730472	-0.453099	0.688529	2.23101	1.62969	3.18165	3.51138	0	0	2.40479	2.48428	3	3.5	0	0	2.5	2.5	low
948	PC-5p-18015_269	TAAGGGACCCAAAATTACTAGT	up	1.05794	0.0812612	0.689003	110.849	117.272	127.266	110.358	94.9225	125.629	131.782	94.4028	120	110	99	127	137	95	middle
949	PC-3p-136395_40	AGGTCTCACACAACTAGCGTCAGT	down	0.742814	-0.428928	0.689099	10.6004	7.8741	11.666	0	20.1351	7.91367	5.77149	9.93714	11	0	21	8	6	10	middle
950	PC-3p-76655_76	TTTTATAGATTCAGAACCATC	down	0.751819	-0.411542	0.690527	20.8165	15.6502	23.3321	28.091	11.0263	7.91367	36.5528	2.48428	22	28	11.5	8	38	2.5	middle
951	cme-MIR164d-p3	CATGTGCCCCTCTTCTCCATC	up	1.09331	0.128698	0.693541	37.1366	40.6017	29.6954	48.1561	33.5584	52.428	35.5908	33.7863	28	48	35	53	37	34	middle
952	ath-miR159c_R+1_1ss20CA	TTTGGATTGAAGGGAGCTCATT	up	1.60227	0.680121	0.695709	1.91763	3.07256	0	0	5.75288	0	6.7334	2.48428	0	0	6	0	7	2.5	low
953	PC-3p-586_2714	TTTGCATAAAATTCGCGCACC	up	1.22093	0.287982	0.696903	253.132	309.057	196.202	333.08	230.115	107.329	525.205	294.636	185	332	240	108.5	546	296.5	middle
954	PC-5p-198519_24	ATTTAAGAATTAGCCAGTGCGTCC	down	0.717238	-0.479477	0.698444	2.30389	1.65244	0	4.51463	2.39703	2.47302	0	2.48428	0	4.5	2.5	2.5	0	2.5	low
955	osa-miR164c_R+1_1ss21AT	TGGAGAAGCAGGGTACGTGCTC	down	0.935005	-0.0969547	0.698545	65.9242	61.6394	75.299	59.1918	63.2816	44.5144	66.3721	74.0317	71	59	66	45	69	74.5	middle
956	ptc-miR167a_R+2_1	TGAAGCTGCCAGCATGATCTAAC	up	1.55927	0.640874	0.699399	3.18165	4.96106	9.54494	0	0	4.94604	0	9.93714	9	0	0	5	0	10	low
957	ptc-miR167a_R+2_2	TGAAGCTGCCAGCATGATCTATC	up	1.55927	0.640874	0.699399	3.18165	4.96106	9.54494	0	0	4.94604	0	9.93714	9	0	0	5	0	10	low
958	mdm-MIR10986-p5_2ss5CG19CA	TTGGGACCAAAGTCACCAAC	up	1.91759	0.939297	0.699831	0.836043	1.60319	0	2.50813	0	0	4.80957	0	0	2.5	0	0	5	0	low
959	PC-5p-268364_15	TATGAGCCCGAGATTCTGCAG	up	1.91759	0.939297	0.699831	1.67209	3.20638	0	5.01626	0	0	9.61915	0	0	5	0	0	10	0	low
960	PC-5p-264657_15	AATGATAGAATATCAAGTTTTAGC	up	1.91759	0.939297	0.699831	0.836043	1.60319	0	2.50813	0	0	4.80957	0	0	2.5	0	0	5	0	low
961	PC-3p-92738_62	ATCTGTAGAATTGCATATAGATGT	down	0.756279	-0.403009	0.700373	8.24565	6.23602	12.1963	12.5406	0	2.96762	4.80957	10.9309	11.5	12.5	0	3	5	11	middle
962	nta-miR6155	TAAGGTTGCCTTGCTCTTGCA	up	1.04924	0.0693409	0.700902	24268.5	25463.4	26100.1	19260.4	27445.1	27580.1	23326.4	25483.8	24610	19198	28624	27881	24250	25645	high
963	ptc-miR6478_R-1	CCGACCTTAGCTCAGTTGGT	down	0.857231	-0.222244	0.703053	17.6563	15.1355	18.0293	9.53089	25.4085	15.3327	22.124	7.94971	17	9.5	26.5	15.5	23	8	middle
964	ptc-miR393a-3p_2ss7CT20TC	ATCATGTTATCCCTTTGGACT	down	0.874257	-0.193871	0.703881	70.8641	61.9534	47.1944	54.1756	111.222	59.3525	65.8912	60.6165	44.5	54	116	60	68.5	61	middle
965	ptc-miR159d_R-1	CTTGGATTGAAGGGAGCTCC	down	0.964188	-0.0526131	0.705843	145.91	140.685	142.644	168.045	127.043	138.489	139.478	144.089	134.5	167.5	132.5	140	145	145	middle
966	PC-3p-68177_86	TTGATCCACGCCTTCCATTTG	down	0.896656	-0.157374	0.707007	16.1144	14.449	19.0899	11.0358	18.2174	19.7842	8.65723	14.9057	18	11	19	20	9	15	middle
967	stu-miR167c-3p_2ss10CT11GT	GGTCATGCTTTGACAGCCTCACT	down	0.532665	-0.908699	0.707275	1.50488	0.801596	0	4.51463	0	0	2.40479	0	0	4.5	0	0	2.5	0	low
968	ath-miR390b-3p_1ss20CT	CGCTATCCATCCTGAGTTCT	up	1.1809	0.239886	0.7079	55.289	65.2908	43.4825	57.1853	65.1993	45.5036	110.62	39.7486	41	57	68	46	115	40	middle
969	mtr-miR156e_R+2	TTGACAGAAGATAGAGAGCACCT	up	1.12434	0.169074	0.70845	14.7638	16.5995	15.9082	13.0423	15.341	11.8705	25.0098	12.9183	15	13	16	12	26	13	middle
970	PC-5p-198635_24	AGGTTTTGAACTCTCTTGAGCACT	up	1.34557	0.428219	0.708842	3.43967	4.62832	5.30275	5.01626	0	5.93525	0	7.94971	5	5	0	6	0	8	low
971	ptc-miR166n_2ss1TA21TC	ACGGACCAGGCTTCATTCCTC	up	1.05442	0.0764494	0.710066	1068.3	1126.43	1198.42	923.493	1082.98	1337.9	922.476	1118.92	1130	920.5	1129.5	1352.5	959	1126	middle
972	stu-miR166b_1ss1TA	ACGGACCAGGCTTCATTCCTC	up	1.05442	0.0764494	0.710066	1068.3	1126.43	1198.42	923.493	1082.98	1337.9	922.476	1118.92	1130	920.5	1129.5	1352.5	959	1126	middle
973	PC-5p-10152_390	AAAAATGTCGCCATACTCGTG	down	0.914731	-0.128581	0.711136	40.7585	37.283	36.5889	29.5959	56.0905	32.1493	38.9575	40.7423	34.5	29.5	58.5	32.5	40.5	41	middle
974	nta-MIR164a-p3	CATGTGCCTGTCTTCCCCATC	up	1.14889	0.200246	0.711787	62.7468	72.0894	66.8146	57.1853	64.2404	88.0395	28.8574	99.3714	63	57	67	89	30	100	middle
975	PC-3p-129526_42	ACCCGGGGAACAAGCAAACAG	up	1.27498	0.350472	0.711994	4.58556	5.84648	0	7.52439	6.23228	2.96762	10.1001	4.47171	0	7.5	6.5	3	10.5	4.5	middle
976	PC-3p-273975_15	TCCTCAATACGTGCTACTTGC	down	0.540204	-0.888425	0.712309	4.15485	2.24447	0	0	12.4646	0	6.7334	0	0	0	13	0	7	0	middle
977	ptc-miR2111a_R-1	TAATCTGCATCCTGAGGTTT	up	1.06199	0.0867735	0.713016	41.3312	43.8935	42.422	34.1106	47.4612	38.0845	39.4385	54.1574	40	34	49.5	38.5	41	54.5	middle
978	stu-miR172d-3p	GGAATCTTGATGATGCTGCAG	down	0.87735	-0.188775	0.713228	66.2227	58.1005	75.299	36.1171	87.252	47.9766	41.3623	84.9625	71	36	91	48.5	43	85.5	middle
979	sbi-MIR5385-p3_2ss9CT19GC	CTCACCACTAACCCCACCCCT	down	0.874092	-0.194143	0.71475	13.2268	11.5614	6.89357	15.0488	17.738	7.91367	16.8335	9.93714	6.5	15	18.5	8	17.5	10	middle
980	sbi-MIR5385-p5_2ss9CT19GC	CTCACCACTAACCCCACCCCT	down	0.874092	-0.194143	0.71475	13.2268	11.5614	6.89357	15.0488	17.738	7.91367	16.8335	9.93714	6.5	15	18.5	8	17.5	10	middle
981	PC-3p-92637_62	CGGGAGTCTTGGCTTGAGGGA	up	1.27784	0.353705	0.714966	7.88529	10.0761	0	14.5471	9.10872	4.45144	16.8335	8.94342	0	14.5	9.5	4.5	17.5	9	middle
982	PC-5p-370932_9	TGCTGTCGATTTTCATCGAAA	down	0.547779	-0.868334	0.717376	3.00975	1.64868	0	9.02926	0	4.94604	0	0	0	9	0	5	0	0	low
983	ptc-miR393a-3p_1ss20TC	ATCATGCTATCCCTTTGGACT	up	1.18687	0.247161	0.718006	23.2632	27.6103	20.6807	15.5504	33.5584	20.2788	46.6529	15.8994	19.5	15.5	35	20.5	48.5	16	middle
984	PC-3p-130883_42	AAGCCTCGCACAACTAGTATCAGT	up	1.30466	0.383678	0.718988	13.6846	17.8538	21.211	15.0488	4.79406	21.7626	0	31.7988	20	15	5	22	0	32	middle
985	nta-MIR6024-p5	AGAAACAACACTTGCTAAAAGA	up	1.16348	0.21845	0.720743	30.6443	35.6542	13.7871	54.1756	23.9703	38.5791	35.5908	32.7926	13	54	25	39	37	33	middle
986	sly-miR164a-5p_1ss21AT	TGGAGAAGCAGGGCACGTGCT	up	1.09582	0.132015	0.723006	97.2177	106.533	74.2384	81.2634	136.151	133.049	83.2056	103.346	70	81	142	134.5	86.5	104	middle
987	PC-5p-249029_17	AAATGCTGGTGCTTCCTATCT	up	1.70939	0.773481	0.72392	4.24373	7.25419	0	6.01951	6.71169	21.7626	0	0	0	6	7	22	0	0	middle
988	mtr-miR166a_1ss21CA	TCGGACCAGGCTTCATTCCCA	up	1.19662	0.258967	0.725161	705.168	843.819	665.495	536.74	913.269	811.645	1437.1	282.712	627.5	535	952.5	820.5	1494	284.5	middle
989	PC-5p-98704_58	AGAAAAATGGGAGCCGTTGGATTA	up	1.30642	0.385624	0.72525	8.34171	10.8978	6.36329	10.0325	8.62931	21.7626	0	10.9309	6	10	9	22	0	11	middle
990	PC-3p-59943_97	TAGTCAAGGAAGGTCTACTCT	down	0.822741	-0.28149	0.725291	27.6011	22.7085	20.1504	29.0943	33.5584	28.687	39.4385	0	19	29	35	29	41	0	middle
991	PC-5p-123503_45	AACACTTGACCAGGTATATGAGG	up	1.21598	0.282115	0.727177	6.8536	8.33381	3.18165	13.5439	3.83525	4.45144	9.61915	10.9309	3	13.5	4	4.5	10	11	middle
992	vvi-miR3630-3p_L-1_1ss2TA	ATGGGAATCTCTCTGATGCAC	down	0.852181	-0.230768	0.727493	33.1827	28.2777	27.044	56.6837	15.8204	30.1709	29.8194	24.8428	25.5	56.5	16.5	30.5	31	25	middle
993	nta-miR6146b	TTTGTCCAATGAAATACTTATC	down	0.82753	-0.273116	0.72856	11747.4	9721.3	11661.3	16781.9	6798.94	3863.85	18649.1	6650.93	10995.5	16727.5	7091	3906	19387.5	6693	high
994	PC-5p-169298_30	AGAGTTGGCTGAATATGTTTC	down	0.720688	-0.472553	0.729163	8.15967	5.88058	5.30275	0	19.1763	4.94604	6.7334	5.96228	5	0	20	5	7	6	middle
995	sly-miR394-5p_R+1	TTGGCATTCTGTCCACCTCCT	down	0.956602	-0.0640089	0.730044	89.056	85.1912	94.9191	89.791	82.4579	77.1582	103.887	74.5285	89.5	89.5	86	78	108	75	middle
996	bcy-miR156	TTTGACAGAAGATAGAGAGCAC	up	1.75779	0.813767	0.731537	1.00325	1.76351	0	3.00975	0	0	5.29053	0	0	3	0	0	5.5	0	low
997	PC-3p-153987_34	AAGAATTTAAGATTAATAAATAGT	up	1.75779	0.813767	0.731537	4.01301	7.05404	0	12.039	0	0	21.1621	0	0	12	0	0	22	0	middle
998	PC-5p-235345_19	TTTCCTCAATGACAGTCATTTACT	up	1.67203	0.741597	0.732252	2.17916	3.64362	3.18165	0	3.35584	0	0	10.9309	3	0	3.5	0	0	11	middle
999	bdi-miR530a_2ss8GA20AC	TGCATTTACACCTGCACCTCC	up	1.12334	0.167798	0.734881	34.5388	38.7989	34.9981	23.0748	45.5436	45.9982	19.7193	50.6794	33	23	47.5	46.5	20.5	51	middle
1000	PC-3p-227164_20	ACGGGCTGGGCTGTGCTAGCCACC	up	1.4552	0.541216	0.735834	2.67534	3.89315	0	8.02601	0	4.94604	6.7334	0	0	8	0	5	7	0	low
1001	PC-3p-45_58472	TCAATGCGTCAGTCAACGTCC	down	0.947996	-0.0770465	0.737444	10294.1	9758.76	10756.1	10319.4	9806.74	7292.44	12056.6	9927.2	10142	10286	10228	7372	12534	9990	high
1002	PC-5p-119_19608	TATTGTGGTGTCGGATCCTCC	up	1.11652	0.159007	0.737949	3203.16	3576.39	3217.71	2172.04	4219.73	5140.92	2236.45	3351.8	3034	2165	4401	5197	2325	3373	high
1003	osa-MIR5149-p5_2ss15TA18TG	TTTCCTTTTCCTTTATTGTCTT	up	1.45214	0.538185	0.738534	3.35584	4.87317	0	0	10.0675	0	8.65723	5.96228	0	0	10.5	0	9	6	middle
1004	PC-5p-369304_9	ATCTTGTTTGGTTGGAGGTATAAA	up	1.72583	0.787294	0.738617	1.67209	2.88574	0	5.01626	0	0	8.65723	0	0	5	0	0	9	0	low
1005	PC-5p-278144_14	TGGAACTCCAGTATATTATGATGC	up	1.72583	0.787294	0.738617	1.67209	2.88574	0	5.01626	0	0	8.65723	0	0	5	0	0	9	0	low
1006	PC-5p-176279_28	AAATTTTGAACCCCCTTAACCACT	up	1.44497	0.531041	0.738697	3.88868	5.61903	11.666	0	0	7.91367	0	8.94342	11	0	0	8	0	9	middle
1007	stu-miR167b-3p_L+3	TCAGATCATGTGGCAGCATCACC	up	1.04801	0.0676481	0.739338	207.77	217.745	205.747	205.667	211.898	166.187	236.631	250.416	194	205	221	168	246	252	middle
1008	PC-3p-47151_123	GCTATTGCTCCTTTCTTTTC	down	0.894188	-0.16135	0.739662	56.8661	50.849	49.8458	85.2764	35.4761	59.3525	36.5528	56.6417	47	85	37	60	38	57	middle
1009	nta-MIR6150-p5	TTGTTTGATCGTCTTGGCCAAG	down	0.862755	-0.212976	0.740158	214.372	184.951	117.721	215.699	309.696	62.3201	251.06	241.472	111	215	323	63	261	243	middle
1010	gma-miR156r_L+2_2ss3CT23TC	AATTGACAGAAGATAGAGAGCAC	up	1.07561	0.105156	0.740161	26.4065	28.4031	25.4532	34.1106	19.6557	21.7626	34.6289	28.8177	24	34	20.5	22	36	29	middle
1011	stu-miR1919-5p_R+2	TGTCGCAGATGACTTTCGCCCTT	up	1.04165	0.0588643	0.740855	15880.1	16541.4	16208.4	15631.7	15800.3	17653.9	13131.6	18838.8	15283	15581	16479	17846.5	13651.5	18958	high
1012	hex-MIR390b-p5_1ss21GA	TAAGAAGAATAAGCTCAGGAA	down	0.813416	-0.297934	0.742489	9.93759	8.0834	5.83302	11.0358	12.944	4.45144	17.3145	2.48428	5.5	11	13.5	4.5	18	2.5	middle
1013	gma-miR4995_L-2	GCAGTGGCTTGGTTAAGGG	down	0.695913	-0.523021	0.746413	2.07335	1.44287	3.71192	2.50813	0	0	4.32862	0	3.5	2.5	0	0	4.5	0	low
1014	nta-MIR6145a-p3	CGGTGCTCATGTGAAGGTGAC	up	1.18691	0.247208	0.74657	189.241	224.612	158.022	287.933	121.769	142.446	398.233	133.158	149	287	127	144	414	134	middle
1015	osa-MIR5538-p3_2ss21AT22AT	ATCACTTGCTGCCGTTACTCTTCA	down	0.591601	-0.757303	0.746803	1.67209	0.989208	0	5.01626	0	2.96762	0	0	0	5	0	3	0	0	low
1016	osa-MIR5538-p5_2ss21AT22AT	ATCACTTGCTGCCGTTACTCTTCA	down	0.591601	-0.757303	0.746803	1.67209	0.989208	0	5.01626	0	2.96762	0	0	0	5	0	3	0	0	low
1017	PC-3p-192169_25	AAGACCGGGCATAGTTCGAGAAGG	down	0.77729	-0.363476	0.746956	4.67793	3.63611	6.36329	0	7.6705	4.94604	0	5.96228	6	0	8	5	0	6	low
1018	PC-5p-132246_41	TTTTTGAAGGATCCGAGCAAC	down	0.774746	-0.368204	0.747382	7.54347	5.84427	0	13.0423	9.58813	7.91367	9.61915	0	0	13	10	8	10	0	middle
1019	PC-3p-285562_14	ATGCCTCACACAACTAGCGTTAGT	up	1.68656	0.754088	0.747691	0.883791	1.49057	2.65137	0	0	0	0	4.47171	2.5	0	0	0	0	4.5	low
1020	PC-5p-133380_41	AAGTTTTGAACCCCCTTGACCACT	down	0.763387	-0.389514	0.749184	11.1589	8.51855	6.36329	6.01951	21.0939	19.7842	5.77149	0	6	6	22	20	6	0	middle
1021	PC-5p-145230_37	AGGTATTGAACTCCCTTGACCACT	down	0.833781	-0.262259	0.749519	3.31785	2.76637	2.65137	2.50813	4.79406	4.45144	3.84766	0	2.5	2.5	5	4.5	4	0	low
1022	sly-miR390a-3p_1ss21AT	CGCTATCCATCCTGAGTTTTT	up	1.07755	0.107752	0.750319	12.1781	13.1225	9.54494	14.0455	12.944	17.3111	9.13819	12.9183	9	14	13.5	17.5	9.5	13	middle
1023	stu-miR390-3p_2ss12TC21AT	CGCTATCCATCCTGAGTTTTT	up	1.07755	0.107752	0.750319	12.1781	13.1225	9.54494	14.0455	12.944	17.3111	9.13819	12.9183	9	14	13.5	17.5	9.5	13	middle
1024	PC-3p-212189_22	AAGAGGCCTCACACAACTAGCATC	up	1.42672	0.512703	0.753052	1.50488	2.14704	0	4.51463	0	3.95683	0	2.48428	0	4.5	0	4	0	2.5	low
1025	PC-3p-200975_24	AATAAATGCGCCACAAAATAGATT	down	0.778608	-0.36103	0.755231	12.3064	9.58187	14.8477	22.0715	0	15.8273	0	12.9183	14	22	0	16	0	13	middle
1026	nta-MIR6163-p3	TGATTAACTTGGAAGTACTGCC	down	0.88257	-0.180217	0.756649	119.008	105.033	119.842	159.517	77.6638	53.4172	170.259	91.4217	113	159	81	54	177	92	middle
1027	PC-5p-139197_39	AGGAGGGATTTGGGGAGCTGTT	down	0.834881	-0.260357	0.757702	6.98923	5.83517	6.36329	5.01626	9.58813	6.92446	10.5811	0	6	5	10	7	11	0	middle
1028	PC-3p-323014_11	ATCCCGTCCATCAAACATAGTATA	up	1.64334	0.716628	0.758184	2.0065	3.29736	0	6.01951	0	9.89208	0	0	0	6	0	10	0	0	low
1029	PC-5p-138510_39	TATAGTTATATGTAGCACTAGC	up	1.56646	0.647504	0.758497	4.91257	7.69532	0	8.02601	6.71169	0	23.086	0	0	8	7	0	24	0	middle
1030	PC-3p-27474_196	TGACTTAGCAGGCATGATTTC	down	0.921918	-0.117289	0.759209	22.9841	21.1895	29.1651	21.5699	18.2174	24.7302	12.5049	26.3334	27.5	21.5	19	25	13	26.5	middle
1031	PC-3p-39038_145	TCAGCAGGATTACTGGACTGC	down	0.826347	-0.27518	0.76091	13.1169	10.8391	11.1358	20.065	8.14991	5.44065	22.605	4.47171	10.5	20	8.5	5.5	23.5	4.5	middle
1032	PC-3p-110812_51	AAGTGATTTCATGAACTCATC	up	1.29303	0.370751	0.761587	7.26868	9.39858	7.42384	0	14.3822	10.8813	17.3145	0	7	0	15	11	18	0	middle
1033	stu-miR166b_R-1	TCGGACCAGGCTTCATTCCT	down	0.960964	-0.0574461	0.762096	556.941	535.2	557.849	471.528	641.446	546.043	608.411	451.146	526	470	669	552	632.5	454	middle
1034	PC-3p-97662_59	TTTATACCACCAACCAAACATAGT	up	1.23605	0.305741	0.762334	4.33592	5.35943	2.65137	6.52114	3.83525	0	9.61915	6.45914	2.5	6.5	4	0	10	6.5	low
1035	PC-5p-241497_18	CTTAAATCTATCCCGTGTTTG	up	1.62124	0.697102	0.763761	2.23723	3.6271	0	0	6.71169	10.8813	0	0	0	0	7	11	0	0	middle
1036	stu-miR398a-3p_1ss21GT	TATGTTCTCAGGTCGCCCCTT	up	1.29662	0.374759	0.764808	2.25011	2.91754	4.2422	2.50813	0	0	5.77149	2.98114	4	2.5	0	0	6	3	low
1037	ptc-miR167a_R+1	TGAAGCTGCCAGCATGATCTAC	up	1.07591	0.105562	0.765166	120.541	129.692	138.402	93.3024	129.919	162.23	81.7627	145.082	130.5	93	135.5	164	85	146	middle
1038	gma-MIR9724-p3_2ss14AG24CT	AATCCTCACCTCAGAAGCTAGCTT	down	0.619058	-0.691853	0.765272	1.33767	0.828095	0	4.01301	0	0	0	2.48428	0	4	0	0	0	2.5	low
1039	gma-MIR9724-p5_2ss14AG24CT	AATCCTCACCTCAGAAGCTAGCTT	down	0.619058	-0.691853	0.765272	1.33767	0.828095	0	4.01301	0	0	0	2.48428	0	4	0	0	0	2.5	low
1040	PC-5p-294637_13	ATTGATCACTTATTGTGGACGGGA	down	0.619058	-0.691853	0.765272	2.67534	1.65619	0	8.02601	0	0	0	4.96857	0	8	0	0	0	5	low
1041	dpr-miR160	TGCCTGGCTCCTTGTATGCCA	up	1.39235	0.477522	0.765434	1.17046	1.62969	0	3.51138	0	0	2.40479	2.48428	0	3.5	0	0	2.5	2.5	low
1042	gma-MIR9724-p5_1ss16AT	ACAATCCTCACCTCATAAGCTAGC	down	0.841436	-0.249074	0.765631	4.9118	4.13296	6.36329	5.01626	3.35584	4.94604	0	7.45285	6	5	3.5	5	0	7.5	low
1043	nta-MIR169m-p3_1ss18AG	AGAGTGGATTGCAGCCAGGGA	up	1.33947	0.421664	0.767639	4.47446	5.99341	0	0	13.4234	6.92446	4.80957	6.2462	0	0	14	7	5	6.28571	middle
1044	stu-miR393-5p	TCCAAAGGGATCGCATTGATCC	up	1.17135	0.228177	0.767911	418.28	489.954	432.174	541.254	281.412	115.243	820.994	533.624	407.5	539.5	293.5	116.5	853.5	537	middle
1045	nta-miR6144	TGGCAACTTCTTCATCATGCC	up	1.10184	0.139909	0.768833	1100.12	1212.15	994.795	1224.97	1080.58	784.442	990.772	1861.23	938	1221	1127	793	1030	1873	high
1046	PC-3p-216251_21	AACTTCCAATGCGCACTACGTCCC	down	0.798582	-0.324488	0.769837	4.89775	3.91126	0	7.02276	7.6705	0	5.77149	5.96228	0	7	8	0	6	6	low
1047	PC-3p-161575_32	TCGATCCACGCCTTCCATTTGTCT	down	0.851224	-0.232389	0.771033	8.39901	7.14944	9.54494	7.02276	8.62931	0	12.5049	8.94342	9	7	9	0	13	9	middle
1048	stu-MIR5303i-p5_2ss12TG23GA	AAAATGTTGTCGCACCCGTGTCA	down	0.630314	-0.665858	0.772834	1.83929	1.15933	0	5.51788	0	0	0	3.478	0	5.5	0	0	0	3.5	low
1049	sly-miR171e	TTGAGCCGCGTCAATATCTCT	up	1.12282	0.167132	0.774955	17.4158	19.5549	13.7871	24.078	14.3822	7.91367	27.8955	22.8554	13	24	15	8	29	23	middle
1050	ptc-miR164a_R+3	TGGAGAAGCAGGGCACGTGCATTT	up	1.5776	0.657735	0.775224	0.836043	1.31894	0	2.50813	0	3.95683	0	0	0	2.5	0	4	0	0	low
1051	PC-3p-184096_27	TTACAATACCTTAAGTTCTGAAAT	up	1.3712	0.455442	0.777211	7.35718	10.0882	0	22.0715	0	0	16.3525	13.912	0	22	0	0	17	14	middle
1052	nta-miR172a_R-1	AGAATCTTGATGATGCTGCA	up	1.52111	0.605126	0.778124	2.39536	3.64362	0	1.43322	5.75288	0	0	10.9309	0	1.42857	6	0	0	11	middle
1053	PC-5p-60847_96	TCCCTTTGTATTCTTTCCGCT	down	0.925957	-0.110982	0.781795	8.28481	7.67138	11.666	5.51788	7.6705	7.91367	9.13819	5.96228	11	5.5	8	8	9.5	6	middle
1054	rgl-miR7972_2ss14TG18CT	TTGTCAGGCTTGTGATTTTCC	down	0.958246	-0.0615318	0.782248	26.6111	25.5	32.877	21.0683	25.8879	26.214	26.9336	23.3523	31	21	27	26.5	28	23.5	middle
1055	nta-MIR398-p5	GGGGCAATCTGAGATCACATG	down	0.852755	-0.229796	0.782438	11.8301	10.0882	12.7266	16.052	6.71169	0	16.3525	13.912	12	16	7	0	17	14	middle
1056	nta-MIR166f-p5	GAATGTTGTCTGGCTCGAAGC	up	1.03816	0.0540334	0.783039	67.7233	70.3079	66.5495	79.8588	56.7617	59.0063	75.7989	76.1185	62.75	79.6	59.2	59.65	78.8	76.6	middle
1057	nta-MIR166b-p5	GAATGTTGTCTGGCTCGAAGC	up	1.03816	0.0540334	0.783039	67.7233	70.3079	66.5495	79.8588	56.7617	59.0063	75.7989	76.1185	62.75	79.6	59.2	59.65	78.8	76.6	middle
1058	nta-miR162a	TCGATAAACCTCTGCATCCAG	up	1.03014	0.0428455	0.783215	13992.6	14414.4	15170.6	11533.4	15273.9	15779.4	13808.3	13655.6	14304.5	11496	15930	15951.5	14355	13742	high
1059	gma-MIR4379-p5_2ss1CA18AG	ATCAACCCCAAAAGCTAGCTCAAG	up	1.25563	0.328406	0.783663	3.29156	4.13296	6.36329	3.51138	0	4.94604	0	7.45285	6	3.5	0	5	0	7.5	low
1060	gma-MIR4379-p3_2ss1CA18AG	ATCAACCCCAAAAGCTAGCTCAAG	up	1.25563	0.328406	0.783663	3.29156	4.13296	6.36329	3.51138	0	4.94604	0	7.45285	6	3.5	0	5	0	7.5	low
1061	PC-3p-308137_12	AGGATCTGACACGAGTGCGGCTAC	down	0.647855	-0.626257	0.784598	2.47461	1.60319	7.42384	0	0	0	4.80957	0	7	0	0	0	5	0	low
1062	PC-5p-304561_12	AAGGCTGCTATTTAGAGATTACTC	down	0.647855	-0.626257	0.784598	2.47461	1.60319	7.42384	0	0	0	4.80957	0	7	0	0	0	5	0	low
1063	PC-3p-34952_160	TCCCTTTGGACCAGGTGCTCC	up	1.07493	0.104236	0.784923	25.5018	27.4125	28.6348	20.065	27.8056	33.6331	32.7051	15.8994	27	20	29	34	34	16	middle
1064	PC-5p-145447_37	TATTGCTACATGTAGCACTGGC	down	0.798964	-0.323798	0.787566	3.43967	2.74817	5.30275	5.01626	0	2.47302	5.77149	0	5	5	0	2.5	6	0	low
1065	nta-MIR6019a-p3	ACATTTACACGTACCTTGTATG	up	1.08361	0.11584	0.787645	43.6973	47.3507	37.6495	53.1723	40.2701	24.7302	58.1958	59.126	35.5	53	42	25	60.5	59.5	middle
1066	nta-MIR6019b-p3	ACATTTACACGTACCTTGTATG	up	1.08361	0.11584	0.787645	43.6973	47.3507	37.6495	53.1723	40.2701	24.7302	58.1958	59.126	35.5	53	42	25	60.5	59.5	middle
1067	PC-5p-42394_135	TTGTAACATGGAGCACTAGCC	down	0.895898	-0.158594	0.788499	23.6352	21.1748	33.9376	12.039	24.9291	10.8813	30.7813	21.8617	32	12	26	11	32	22	middle
1068	PC-5p-60298_97	ATGAAGCGTGGGGGACATATGGGA	up	1.07031	0.0980335	0.788833	20.0935	21.5063	18.0293	23.0748	19.1763	20.2788	14.4287	29.8114	17	23	20	20.5	15	30	middle
1069	PC-3p-236471_18	TTCTCCACGTCTATTCTATCC	up	1.22744	0.295657	0.788984	2.69248	3.30487	4.2422	0	3.83525	4.94604	0	4.96857	4	0	4	5	0	5	low
1070	mdm-miR482b	TCTTTCCTATCCCTCCCATTCC	up	1.25785	0.330963	0.790372	4.42615	5.56745	8.48439	0	4.79406	0	5.77149	10.9309	8	0	5	0	6	11	middle
1071	nta-miR6145f_L+1	TATCGTAACATATAGCACTAGC	down	0.868645	-0.203162	0.790911	599.93	521.126	607.695	850.757	341.337	238.399	981.153	343.825	573	848	356	241	1020	346	middle
1072	nta-MIR6145e-p3	CCGTGCTCATGTGACAATCC	down	0.931835	-0.101854	0.794833	30.4401	28.3652	37.1192	33.1073	21.0939	18.795	38.4766	27.824	35	33	22	19	40	28	middle
1073	PC-3p-266710_15	CAAAAGTTTAACGGCAGGGGCACC	up	1.50485	0.589622	0.795737	1.91763	2.88574	0	0	5.75288	0	8.65723	0	0	0	6	0	9	0	low
1074	PC-3p-271098_15	ATTACATTTTGGAGAGTCCGCGCA	up	1.50485	0.589622	0.795737	1.91763	2.88574	0	0	5.75288	0	8.65723	0	0	0	6	0	9	0	low
1075	ptc-miR166a_L+2R-1	CTTCGGACCAGGCTTCATTCCC	up	1.09591	0.132126	0.795955	12.2218	13.394	15.9082	14.0455	6.71169	18.3004	14.4287	7.45285	15	14	7	18.5	15	7.5	middle
1076	PC-5p-287127_13	ATGCTAGAGTTCCAACATAATATG	up	1.49917	0.584163	0.797418	1.76758	2.6499	5.30275	0	0	0	0	7.94971	5	0	0	0	0	8	low
1077	nta-MIR160a-p3	TATGAGGAGCCAAGCATATCC	up	1.0552	0.07751	0.798252	116.4	122.824	86.4348	109.354	153.41	99.4154	127.454	141.604	81.5	109	160	100.5	132.5	142.5	middle
1078	nta-MIR160b-p3	TATGAGGAGCCAAGCATATCC	up	1.0552	0.07751	0.798252	116.4	122.824	86.4348	109.354	153.41	99.4154	127.454	141.604	81.5	109	160	100.5	132.5	142.5	middle
1079	PC-5p-108057_53	ATAGTGACACAAAGTATTAGCC	up	1.26439	0.338437	0.79837	3.82903	4.84137	3.18165	3.51138	4.79406	0	11.543	2.98114	3	3.5	5	0	12	3	middle
1080	PC-3p-308581_12	AAAACTAGTGTGAGTTGTATGAGA	down	0.669272	-0.579336	0.798908	2.47461	1.65619	7.42384	0	0	0	0	4.96857	7	0	0	0	0	5	low
1081	PC-3p-292070_13	AAAATGTCCTGGAGCTCGAGTTTT	up	1.49237	0.577607	0.799443	0.883791	1.31894	2.65137	0	0	3.95683	0	0	2.5	0	0	4	0	0	low
1082	nta-MIR6020b-p3	AGATACTCGAAAAACATTTAC	down	0.856108	-0.224135	0.799884	523.405	448.091	506.942	756.452	306.82	137.5	919.59	287.183	478	754	320	139	956	289	middle
1083	lus-MIR164c-p3	CATGTGCCCATCTTCCCCATC	up	1.16407	0.219178	0.801684	7.63155	8.88367	5.30275	7.52439	10.0675	4.45144	4.80957	17.39	5	7.5	10.5	4.5	5	17.5	middle
1084	lus-MIR164c-p5	CATGTGCCCATCTTCCCCATC	up	1.16407	0.219178	0.801684	7.63155	8.88367	5.30275	7.52439	10.0675	4.45144	4.80957	17.39	5	7.5	10.5	4.5	5	17.5	middle
1085	nta-miR6148b_R+2	TGTGTTAATCGTTTGTTCTCAAC	down	0.911062	-0.13438	0.801768	10.7844	9.82522	9.54494	17.0553	5.75288	10.8813	8.65723	9.93714	9	17	6	11	9	10	middle
1086	nta-MIR6161d-p3_2ss19AG24AG	AATATACTGGAGTTTGGAGCACCG	up	1.07535	0.104809	0.801908	95.0967	102.262	69.9962	98.3187	116.975	89.0287	146.211	71.5474	66	98	122	90	152	72	middle
1087	PC-5p-98454_58	AAATCAACCGGCAAGTCTTCC	up	1.25431	0.326893	0.803348	6.80879	8.54033	18.0293	0	2.39703	5.44065	5.77149	14.4089	17	0	2.5	5.5	6	14.5	middle
1088	PC-3p-270715_15	AGGGATCGGCCCGGGATCGGGATC	up	1.479	0.564625	0.803475	2.0065	2.96762	0	6.01951	0	8.90287	0	0	0	6	0	9	0	0	low
1089	PC-3p-91775_63	AAGAGGCCTCACACAACTAGCGTC	down	0.905528	-0.143169	0.805668	5.44186	4.92776	3.18165	4.51463	8.62931	5.93525	2.88574	5.96228	3	4.5	9	6	3	6	low
1090	nta-MIR6152b-p3	AATCAATTAACATAATAGACTCCT	down	0.909991	-0.136075	0.808363	17.8508	16.244	13.7871	21.0683	18.6968	10.3867	27.4146	10.9309	13	21	19.5	10.5	28.5	11	middle
1091	nta-MIR6152a-p3	AATCAATTAACATAATAGACTCCT	down	0.909991	-0.136075	0.808363	17.8508	16.244	13.7871	21.0683	18.6968	10.3867	27.4146	10.9309	13	21	19.5	10.5	28.5	11	middle
1092	PC-3p-166156_31	ATTACAATACCTGAAGTTTTGAAA	up	1.20755	0.272087	0.808559	4.59296	5.54625	0	8.02601	5.75288	0	7.69532	8.94342	0	8	6	0	8	9	low
1093	ath-miR157a-3p_1ss10CT	GCTCTCTAGTCTTCTGTCATC	up	1.12358	0.168105	0.808912	454.055	510.168	448.612	536.74	376.813	322.482	911.895	296.127	423	535	393	326	948	298	middle
1094	PC-5p-301783_12	ACTGATCCTGAAATAAGTTATCCC	down	0.684855	-0.546129	0.809271	2.34092	1.60319	0	7.02276	0	0	4.80957	0	0	7	0	0	5	0	low
1095	PC-5p-69354_84	TATTTTGTGGGGCATTTGTTTACT	down	0.830939	-0.267185	0.811092	16.2878	13.5342	18.0293	25.0813	5.75288	30.6655	0	9.93714	17	25	6	31	0	10	middle
1096	nta-miR6019a	TACAGGTGACTTGTAAATGTTT	down	0.921105	-0.118563	0.811879	776.598	715.328	757.762	910.451	661.581	458.993	1152.37	534.618	714.5	907.5	690	464	1198	538	middle
1097	nta-MIR6157-p3	TTTAAATCCTAGTCTTCCATT	up	1.13468	0.182289	0.812156	29.7408	33.7464	18.0293	27.0878	44.1054	22.7518	60.6006	17.8868	17	27	46	23	63	18	middle
1098	PC-3p-309055_12	CAGTGCTCATGTTACAATCC	up	1.44438	0.530452	0.81423	0.799011	1.15408	0	0	2.39703	3.46223	0	0	0	0	2.5	3.5	0	0	low
1099	PC-3p-315035_12	ATCAATTATCCGACCTGACCCATA	up	1.44438	0.530452	0.81423	1.59802	2.30815	0	0	4.79406	6.92446	0	0	0	0	5	7	0	0	low
1100	PC-3p-317190_12	ACTAGTGTCAGAGTTGTATGAGAC	up	1.44438	0.530452	0.81423	1.59802	2.30815	0	0	4.79406	6.92446	0	0	0	0	5	7	0	0	low
1101	ptc-miR403a_R-3	TTAGATTCACGCACAAAC	up	1.4382	0.52426	0.8162	2.0065	2.88574	0	6.01951	0	0	8.65723	0	0	6	0	0	9	0	low
1102	PC-5p-160716_32	AGGTGCGTGTCAGATACTCCAAAA	up	1.13834	0.186928	0.816863	4.88294	5.55844	0	6.01951	8.62931	5.93525	5.77149	4.96857	0	6	9	6	6	5	low
1103	cas-MIR11592-p5_1ss12AG	AACCGAACCGAGCCGAACCGAACC	down	0.770395	-0.376329	0.816879	1.71983	1.32495	2.65137	2.50813	0	0	0	3.97486	2.5	2.5	0	0	0	4	low
1104	cas-MIR11592-p3_1ss12AG	AACCGAACCGAGCCGAACCGAACC	down	0.770395	-0.376329	0.816879	1.71983	1.32495	2.65137	2.50813	0	0	0	3.97486	2.5	2.5	0	0	0	4	low
1105	nta-MIR6025b-p5	TGTTATCTCAGTGTTGGCATG	up	1.01984	0.0283398	0.816903	261.8	266.994	261.69	231.751	291.958	289.343	251.781	259.856	246.75	231	304.5	292.5	261.75	261.5	middle
1106	nta-MIR6025e-p5	TGTTATCTCAGTGTTGGCATG	up	1.01984	0.0283398	0.816903	261.8	266.994	261.69	231.751	291.958	289.343	251.781	259.856	246.75	231	304.5	292.5	261.75	261.5	middle
1107	nta-MIR6025d-p3	TGTTATCTCAGTGTTGGCATG	up	1.01984	0.0283398	0.816903	261.8	266.994	261.69	231.751	291.958	289.343	251.781	259.856	246.75	231	304.5	292.5	261.75	261.5	middle
1108	nta-MIR6025a-p3	TGTTATCTCAGTGTTGGCATG	up	1.01984	0.0283398	0.816903	261.8	266.994	261.69	231.751	291.958	289.343	251.781	259.856	246.75	231	304.5	292.5	261.75	261.5	middle
1109	nta-MIR166g-p5_1ss19TA	AGAATGTTGTCTGGTTCGAGA	up	1.15264	0.20494	0.817633	11.8005	13.6017	12.7266	14.0455	8.62931	8.90287	26.9336	4.96857	12	14	9	9	28	5	middle
1110	cas-miR11592_L+4R+1_1ss23AC	AACCGAACCGAACCGAACCGAACC	up	1.19564	0.257785	0.818313	4.70211	5.62203	3.18165	8.52764	2.39703	5.93525	0	10.9309	3	8.5	2.5	6	0	11	middle
1111	stu-miR166b	TCGGACCAGGCTTCATTCCTC	up	1.02301	0.0328211	0.819115	100437	102748	106139	89665.1	105506	118119	95716.3	94407.8	100079	89374.5	110038	119408	99506	95005	high
1112	PC-3p-389995_8	CCCCTTGCCTCTTCGATGTG	down	0.702735	-0.508947	0.821099	1.41407	0.993714	4.2422	0	0	0	0	2.98114	4	0	0	0	0	3	low
1113	mdm-miR2118a	CTACCGATGCCACTAAGTCCCA	down	0.707495	-0.499208	0.824235	2.34092	1.65619	0	7.02276	0	0	0	4.96857	0	7	0	0	0	5	low
1114	csi-miR167b-5p_R+1	TGAAGCTGCCAGCATGATCTTT	up	1.06911	0.096412	0.824461	12.1765	13.018	13.1508	11.5374	11.8413	19.6358	9.28248	10.1359	12.4	11.5	12.35	19.85	9.65	10.2	middle
1115	gma-miR408a-3p_L-1R+4	TGCACTGCCTCTTCCCTGGCTTTT	down	0.929371	-0.105674	0.824696	15.4503	14.3591	16.9688	17.5569	11.8254	7.7488	13.4668	21.8617	16	17.5	12.3333	7.83333	14	22	middle
1116	mdm-miR408a_L-1R+4	TGCACTGCCTCTTCCCTGGCTTTT	down	0.929371	-0.105674	0.824696	15.4503	14.3591	16.9688	17.5569	11.8254	7.7488	13.4668	21.8617	16	17.5	12.3333	7.83333	14	22	middle
1117	PC-5p-443_3777	ACGCTAACTGGCGCATTGAGC	down	0.941724	-0.0866241	0.825586	1672.6	1575.13	1647.03	2025.56	1345.21	1225.63	2287.43	1212.33	1553	2019	1403	1239	2378	1220	high
1118	PC-3p-107637_53	AAGCGCTTACGTCGGCAGGACATT	down	0.932167	-0.10134	0.826233	18.2733	17.0338	20.1504	25.0813	9.58813	13.8489	15.3906	21.8617	19	25	10	14	16	22	middle
1119	nta-miR6145d	ATTGTTACATGTAACACTGGC	down	0.894106	-0.161483	0.830373	2634.22	2355.27	2776.52	3406.04	1720.11	1001.57	4490.7	1573.55	2618	3395	1794	1012.5	4668.5	1583.5	high
1120	PC-5p-242463_18	ATCGGTCCAGTATAATACGCTAGA	down	0.747092	-0.420642	0.830682	4.79406	3.58161	0	0	14.3822	5.93525	4.80957	0	0	0	15	6	5	0	middle
1121	stu-miR166b_R-2_1ss19CT	TCGGACCAGGCTTCATTCT	down	0.975782	-0.0353687	0.830818	271.041	264.477	308.09	232.253	272.782	267.086	295.308	231.038	290.5	231.5	284.5	270	307	232.5	middle
1122	ath-miR159b-3p_R+2	TTTGGATTGAAGGGAGCTCTTCC	down	0.719098	-0.47574	0.831855	1.33767	0.961915	0	4.01301	0	0	2.88574	0	0	4	0	0	3	0	low
1123	ath-miR165a-3p_R-1_1ss19CT	TCGGACCAGGCTTCATCCTC	down	0.719098	-0.47574	0.831855	2.67534	1.92383	0	8.02601	0	0	5.77149	0	0	8	0	0	6	0	low
1124	PC-3p-283021_14	AAAAGAGCCTCACACAACTAATGT	up	1.26358	0.337516	0.83693	2.87644	3.63461	0	0	8.62931	5.93525	0	4.96857	0	0	9	6	0	5	low
1125	nta-MIR390c-p3	CGCTATCCATCCTGAGTTTCA	down	0.848849	-0.23642	0.839037	7.25195	6.15581	12.7266	9.02926	0	6.92446	11.543	0	12	9	0	7	12	0	middle
1126	nta-MIR827-p5	TTTGTTGATGGTCATCTATTC	down	0.857496	-0.221798	0.841932	27.0851	23.2253	30.7559	36.1171	14.3822	5.93525	55.7911	7.94971	29	36	15	6	58	8	middle
1127	PC-5p-301961_12	ATGCGCGTACAGTTGAACTACCCT	down	0.736929	-0.440402	0.843493	2.23723	1.64868	0	0	6.71169	4.94604	0	0	0	0	7	5	0	0	low
1128	nta-miR6162_L+1R-1	TAGAAAAATGGTAGCCATTGG	down	0.811204	-0.301863	0.844127	7.96132	6.45825	19.0899	0	4.79406	4.94604	14.4287	0	18	0	5	5	15	0	middle
1129	nta-miR394	TTGGCATTCTGTCCACCTCC	up	1.04271	0.0603395	0.844984	33893.6	35341.2	34486.9	32930.7	34263.2	26407.9	48020.7	31595.1	32518	32824	35735	26696	49922	31795	high
1130	ath-miR159c_R+2_1ss20CT	TTTGGATTGAAGGGAGCTCTTTT	down	0.957119	-0.0632291	0.845001	504.19	482.57	484.671	520.688	507.212	672.662	422.281	352.768	457	519	529	680	439	355	middle
1131	aof-miR393a_1ss22CT	TCCAAAGGGATCGCATTGATTT	down	0.906999	-0.140827	0.845709	15.1123	13.7068	22.2715	12.039	11.0263	2.47302	18.2764	20.3711	21	12	11.5	2.5	19	20.5	middle
1132	csi-miR393b-5p_L-1R+1_1ss22CT	TCCAAAGGGATCGCATTGATTT	down	0.906999	-0.140827	0.845709	15.1123	13.7068	22.2715	12.039	11.0263	2.47302	18.2764	20.3711	21	12	11.5	2.5	19	20.5	middle
1133	PC-5p-534118_6	TTATCTATGTTGTGCGGACTCTCC	down	0.863621	-0.211529	0.847296	3.77408	3.25938	5.30275	6.01951	0	0	4.80957	4.96857	5	6	0	0	5	5	low
1134	PC-5p-279709_14	AAGCACCAACCACCAAGGTCCACT	down	0.74287	-0.428819	0.847348	2.67534	1.98743	0	8.02601	0	0	0	5.96228	0	8	0	0	0	6	low
1135	PC-5p-302875_12	TGAGAGACCGACAACATTCAA	up	1.34232	0.424724	0.848716	1.67209	2.24447	0	5.01626	0	0	6.7334	0	0	5	0	0	7	0	low
1136	nta-miR6145e_R+1	ATTGTTACATGTAGCACTGGCT	down	0.982903	-0.024879	0.849365	4619.54	4540.56	4717.32	4372.17	4769.13	4060.21	5231.37	4330.11	4448	4358	4974	4104.5	5438.5	4357.5	high
1137	PC-3p-297860_13	ATGTAAATAATTTCGGGCACGAGC	down	0.806667	-0.309954	0.850401	3.27011	2.63789	0	5.01626	4.79406	7.91367	0	0	0	5	5	8	0	0	low
1138	PC-3p-67636_86	TCGATCCATGACTTCCATTTGTCC	down	0.96252	-0.0551122	0.851408	29.6311	28.5205	25.9835	24.078	38.8319	31.6547	22.605	31.302	24.5	24	40.5	32	23.5	31.5	middle
1139	stu-miR167a-5p_L+2R+1	AATGAAGCTGCCAGCATGATCTAA	up	1.12139	0.165283	0.852686	11.6395	13.0524	9.54494	10.0325	15.341	20.7734	0	18.3837	9	10	16	21	0	18.5	middle
1140	nta-miR6020a-3p	AGATACTCAGCAAAACATTTAC	down	0.953712	-0.0683751	0.854289	135.256	128.996	114.539	167.543	123.687	105.845	182.764	98.3777	108	167	129	107	190	99	middle
1141	PC-5p-154868_34	ACAATACCCTACCCAGACCCCACT	down	0.979133	-0.0304238	0.85619	5.6769	5.55844	5.30275	5.01626	6.71169	5.93525	5.77149	4.96857	5	5	7	6	6	5	low
1142	PC-3p-193323_25	TTCCGCATAAATCTCCAAGTT	down	0.853577	-0.228407	0.857304	4.03209	3.44169	0	2.50813	9.58813	2.96762	2.88574	4.47171	0	2.5	10	3	3	4.5	low
1143	han-miR156a_L+2	AATGACAGAAGAGAGTGAGCAC	up	1.31835	0.398729	0.857455	2.67534	3.52702	0	8.02601	0	0	10.5811	0	0	8	0	0	11	0	middle
1144	nta-miR6147	TGACATCTTCAAAACCCACTA	down	0.96483	-0.0516536	0.858976	429.876	414.757	311.801	472.531	505.294	314.568	493.462	436.24	294	471	527	318	513	439	middle
1145	ath-MIR8176-p3_1ss11GA	TGCTTACCGAATTTCTTACATTT	down	0.875675	-0.191533	0.861343	1.88704	1.65244	2.65137	3.00975	0	2.47302	0	2.48428	2.5	3	0	2.5	0	2.5	low
1146	nta-MIR6025c-p5	CCTGGATGTAATCTCAATTGT	up	1.0422	0.0596342	0.863004	227.911	237.529	232.26	256.832	194.639	188.939	331.861	191.787	219	256	203	191	345	193	middle
1147	lus-miR159b_R+2_1ss21CA	TTTGGATTGAAGGGAGCTCTATT	down	0.978396	-0.031509	0.865312	298.937	292.479	341.497	241.784	313.532	302.698	319.356	255.384	322	241	327	306	332	257	middle
1148	PC-3p-154057_34	AAAGAGGCCTTACACAACTAGTGT	down	0.878012	-0.187688	0.865367	6.02417	5.28929	8.48439	0	9.58813	6.92446	0	8.94342	8	0	10	7	0	9	low
1149	PC-3p-102215_56	ATCCCAGCCCTTCATTCATCAGG	up	1.18851	0.249153	0.869072	9.74566	11.5828	21.211	8.02601	0	6.92446	0	27.824	20	8	0	7	0	28	middle
1150	PC-3p-524776_6	AAGCCTCATACAACTAGTCTCAGT	down	0.777277	-0.3635	0.869448	2.1211	1.64868	6.36329	0	0	4.94604	0	0	6	0	0	5	0	0	low
1151	PC-3p-338178_11	ATACCTCATATAACTAGTGTCAGT	down	0.777277	-0.3635	0.869448	2.1211	1.64868	6.36329	0	0	4.94604	0	0	6	0	0	5	0	0	low
1152	PC-3p-54362_107	AATCATTCTTCTTAGTCTGCC	down	0.923289	-0.115146	0.873642	25.3346	23.3911	27.5743	11.0358	37.3937	34.6223	6.7334	28.8177	26	11	39	35	7	29	middle
1153	PC-3p-262613_16	ACTGTTACTGTATAGCGCCAGGTA	up	1.27349	0.348789	0.874505	1.17046	1.49057	0	3.51138	0	0	0	4.47171	0	3.5	0	0	0	4.5	low
1154	ppe-miR858_1ss4GA	CTCATTGTCTGTTCGACCTTG	up	1.05837	0.0818413	0.875257	8.96748	9.49089	13.2569	5.01626	8.62931	5.93525	9.61915	12.9183	12.5	5	9	6	10	13	middle
1155	PC-3p-304586_12	CCGGAATGAAATGAGTGTTTC	up	1.2698	0.344596	0.875951	0.883791	1.12223	2.65137	0	0	0	3.3667	0	2.5	0	0	0	3.5	0	low
1156	mes-MIR319h-p5	AGAGCTTCCTTCAGCCCACTC	down	0.888441	-0.170652	0.877412	2.19612	1.95112	3.71192	0	2.87644	2.96762	2.88574	0	3.5	0	3	3	3	0	low
1157	nta-miR156a	TGACAGAAGAGAGTGAGCAC	up	1.06816	0.095121	0.879741	1170.97	1250.78	1357.36	1236.81	918.734	757.14	2160.27	834.918	1279.87	1232.8	958.2	765.4	2245.8	840.2	high
1158	bra-miR168b-5p_R+1	TCGCTTGGTGCAGGTCGGGACA	down	0.973416	-0.0388712	0.881412	11.756	11.4435	12.7266	11.0358	11.5058	7.91367	12.5049	13.912	12	11	12	8	13	14	middle
1159	nta-MIR6156-p5	AATAGGACATCTTCAACACTC	down	0.798998	-0.323737	0.883178	2.0065	1.60319	0	6.01951	0	0	4.80957	0	0	6	0	0	5	0	low
1160	bdi-MIR2118a-p5_2ss4TA19TC	CTTACCGATGCCTCCCATCCC	down	0.798998	-0.323737	0.883178	1.00325	0.801596	0	3.00975	0	0	2.40479	0	0	3	0	0	2.5	0	low
1161	bdi-MIR2118a-p3_2ss4TA19TC	CTTACCGATGCCTCCCATCCC	down	0.798998	-0.323737	0.883178	1.00325	0.801596	0	3.00975	0	0	2.40479	0	0	3	0	0	2.5	0	low
1162	PC-5p-45805_126	TTTCATCAACATGCATGCCTGGCA	down	0.930627	-0.103725	0.883776	28.2781	26.3164	14.8477	43.1398	26.8468	43.5252	10.5811	24.8428	14	43	28	44	11	25	middle
1163	PC-3p-390531_8	TTACCTCATACAACTAGTGTCAGT	up	1.24931	0.321128	0.884085	2.1211	2.6499	6.36329	0	0	0	0	7.94971	6	0	0	0	0	8	low
1164	osa-MIR5149-p5_2ss14TA17TG	TTCCTTTTCCTTTATTGTCTTT	up	1.11448	0.156376	0.886498	8.19358	9.13161	6.36329	0	18.2174	3.46223	12.5049	11.4277	6	0	19	3.5	13	11.5	middle
1165	osa-MIR5149-p3_2ss14TA17TG	TTCCTTTTCCTTTATTGTCTTT	up	1.11448	0.156376	0.886498	8.19358	9.13161	6.36329	0	18.2174	3.46223	12.5049	11.4277	6	0	19	3.5	13	11.5	middle
1166	PC-5p-91699_63	TTTAGACACTTAAACTCAGCC	up	1.07883	0.109462	0.887012	10.8498	11.7051	5.30275	9.02926	18.2174	4.94604	19.2383	10.9309	5	9	19	5	20	11	middle
1167	PC-5p-326879_11	ACAAATATGATAAACCGATAACCG	up	1.23804	0.30806	0.888643	1.59802	1.97842	0	0	4.79406	5.93525	0	0	0	0	5	6	0	0	low
1168	PC-5p-325592_11	TTAAACTCACGAATTCTACTCGCT	up	1.23804	0.30806	0.888643	1.59802	1.97842	0	0	4.79406	5.93525	0	0	0	0	5	6	0	0	low
1169	aly-miR167a-5p_R+2	TGAAGCTGCCAGCATGATCTATT	down	0.967884	-0.0470941	0.889821	73.4795	71.1197	74.3975	74.9931	71.048	71.2395	45.0336	97.0858	70.15	74.75	74.1	72.0167	46.8167	97.7	middle
1170	PC-3p-55846_104	TTGGTATCAATCAACAATAAAA	down	0.896992	-0.156833	0.890216	14.5953	13.0918	10.0752	25.0813	8.62931	0	29.3384	9.93714	9.5	25	9	0	30.5	10	middle
1171	PC-5p-8141_445	TATGTCTTGCGAACAATTGCT	down	0.981405	-0.0270795	0.89117	37.9056	37.2008	44.5431	35.6154	33.5584	40.0629	30.3003	41.2391	42	35.5	35	40.5	31.5	41.5	middle
1172	PC-3p-218230_21	ATTCGTCCTCATAAAGTGTGTAAC	down	0.838171	-0.254683	0.891864	3.88868	3.25938	11.666	0	0	0	4.80957	4.96857	11	0	0	0	5	5	middle
1173	mtr-miR166b_2ss20TC21AG	TCGGACCAGGCTTCATTCCCG	up	1.03819	0.0540703	0.893515	17.1465	17.8013	25.4532	13.0423	12.944	15.3327	20.6812	17.39	24	13	13.5	15.5	21.5	17.5	middle
1174	gma-miR166h-3p_L-2R+2	TCGGACCAGGCTTCATTCCCG	up	1.03819	0.0540703	0.893515	17.1465	17.8013	25.4532	13.0423	12.944	15.3327	20.6812	17.39	24	13	13.5	15.5	21.5	17.5	middle
1175	PC-3p-333721_11	ACCGATGTGGGACAAAAATTTGCC	down	0.821668	-0.283372	0.897305	2.0065	1.64868	0	6.01951	0	4.94604	0	0	0	6	0	5	0	0	low
1176	nta-MIR166e-p5	GGAATGTTGTCTGGCTCGAGG	up	1.02298	0.0327756	0.897644	634.939	649.529	523.204	696.19	685.423	485.108	791.463	672.016	493.333	693.933	714.867	490.4	822.8	676.267	middle
1177	nta-MIR166a-p5	GGAATGTTGTCTGGCTCGAGG	up	1.02298	0.0327756	0.897644	634.939	649.529	523.204	696.19	685.423	485.108	791.463	672.016	493.333	693.933	714.867	490.4	822.8	676.267	middle
1178	nta-MIR166d-p5	GGAATGTTGTCTGGCTCGAGG	up	1.02298	0.0327756	0.897644	634.939	649.529	523.204	696.19	685.423	485.108	791.463	672.016	493.333	693.933	714.867	490.4	822.8	676.267	middle
1179	nta-MIR319b-p5	AGAGCTTCCTTCAGTCCACTC	up	1.14885	0.200191	0.897771	7.99011	9.17944	0	0	23.9703	13.8489	6.7334	6.956	0	0	25	14	7	7	middle
1180	nta-miR827	TTAGATGAACATCAACAAACA	up	1.09671	0.133182	0.899027	304.256	333.681	300.135	453.47	159.163	136.511	721.436	143.095	283	452	166	138	750	144	middle
1181	PC-3p-66257_88	TATCTATTCCTTTTCCTGAAC	up	1.03405	0.0483006	0.899334	12.7022	13.1346	13.2569	9.02926	15.8204	16.3219	8.17627	14.9057	12.5	9	16.5	16.5	8.5	15	middle
1182	PC-3p-328168_11	AAAGCATTTTTGGAGGATCCGAGC	down	0.825411	-0.276815	0.899617	2.0065	1.65619	0	6.01951	0	0	0	4.96857	0	6	0	0	0	5	low
1183	nta-MIR156j-p3	GCTCTCTATGCTTCTGTCATC	up	1.08069	0.111955	0.902459	221.191	239.039	195.318	303.818	164.436	99.4154	487.691	130.011	184.167	302.833	171.5	100.5	507	130.833	middle
1184	stu-miR156d-3p_R-1	GCTCTCTATGCTTCTGTCATC	up	1.08069	0.111955	0.902459	221.191	239.039	195.318	303.818	164.436	99.4154	487.691	130.011	184.167	302.833	171.5	100.5	507	130.833	middle
1185	PC-3p-323959_11	ATGACTAATCTCTAAATAGCATCC	up	1.20388	0.267694	0.90284	1.59802	1.92383	0	0	4.79406	0	5.77149	0	0	0	5	0	6	0	low
1186	stu-MIR7985-p3_2ss13CT17GA	GAGCTCGTCGCATCGGACTTGCCT	up	1.20365	0.267418	0.902938	0.958813	1.15408	0	0	2.87644	3.46223	0	0	0	0	3	3.5	0	0	low
1187	stu-MIR7985-p5_2ss13CT17GA	GAGCTCGTCGCATCGGACTTGCCT	up	1.20365	0.267418	0.902938	0.958813	1.15408	0	0	2.87644	3.46223	0	0	0	0	3	3.5	0	0	low
1188	PC-5p-497694_6	AATGCTTTGAGCACTTGGGTTTGC	up	1.20365	0.267418	0.902938	1.91763	2.30815	0	0	5.75288	6.92446	0	0	0	0	6	7	0	0	low
1189	PC-5p-219471_21	TATGTTACTCGAACTCTTCAACA	up	1.16868	0.224884	0.903877	2.39822	2.80276	3.18165	4.01301	0	8.40827	0	0	3	4	0	8.5	0	0	low
1190	stu-miR156f-5p_L-1R+1	TGACAGAAGAGAGTGAGCAT	down	0.909317	-0.137146	0.90449	2.32201	2.11144	2.65137	0	4.31466	2.96762	3.3667	0	2.5	0	4.5	3	3.5	0	low
1191	PC-5p-124025_45	TGGCAGAATAAGAAGAAAGAT	down	0.923495	-0.114824	0.906104	10.5244	9.71922	16.9688	5.01626	9.58813	10.8813	18.2764	0	16	5	10	11	19	0	middle
1192	PC-5p-200176_24	ATCGGTCCAGCATAATATGATAGA	up	1.16318	0.218078	0.906419	3.68521	4.28657	5.30275	0	5.75288	12.8597	0	0	5	0	6	13	0	0	middle
1193	nta-MIR479b-p3	TGAGCCGAACCAATATCACTC	down	0.96834	-0.0464151	0.906705	26.7124	25.8667	26.5137	20.065	33.5584	16.8165	25.0098	35.7737	25	20	35	17	26	36	middle
1194	PC-3p-355664_10	TACGGTTACAGTGCCTCTATC	down	0.873685	-0.194815	0.907763	3.77408	3.29736	5.30275	6.01951	0	9.89208	0	0	5	6	0	10	0	0	low
1195	PC-5p-17915_270	AAAAACTTTTTAGAAATTTGTTCA	down	0.928157	-0.107559	0.910518	46.1846	42.8666	23.3321	90.2926	24.9291	19.7842	75.0293	33.7863	22	90	26	20	78	34	middle
1196	PC-3p-61071_96	TTAGGACCAAAAAGATGCCCGAAG	down	0.96863	-0.0459829	0.91125	16.2286	15.7195	18.0293	21.0683	9.58813	20.7734	13.4668	12.9183	17	21	10	21	14	13	middle
1197	stu-miR482c_2ss6TG22AG	TTTCCGATTCCACCCATGCCAG	up	1.0173	0.0247444	0.913091	1107.91	1127.08	924.269	1115.62	1283.85	1368.57	934.981	1077.68	871.5	1112	1339	1383.5	972	1084.5	middle
1198	PC-3p-297283_13	ATTTTGCCCTGCCCTGTCCTGTCC	down	0.848994	-0.236174	0.91404	2.34092	1.98743	0	7.02276	0	0	0	5.96228	0	7	0	0	0	6	low
1199	stu-MIR7997c-p3_1ss11CT	TTTGGAGAGTTCGAGCAACAT	up	1.01559	0.0223207	0.916355	295.197	299.799	278.924	253.823	352.843	356.115	278.955	264.328	263	253	368	360	290	266	middle
1200	nta-miR6156	TTGAAGATGTTCTATTTCTGT	up	1.17044	0.227052	0.917299	1.91763	2.24447	0	0	5.75288	0	6.7334	0	0	0	6	0	7	0	low
1201	PC-3p-167038_31	TCTCGTTGAAATCTAGCTACC	down	0.921724	-0.117593	0.918344	4.25659	3.9234	3.18165	0	9.58813	2.47302	4.32862	4.96857	3	0	10	2.5	4.5	5	low
1202	nta-MIR169t-p3	TGGCAAGCATCTTTGGCGACT	down	0.958557	-0.0610634	0.918544	12.0016	11.5042	12.7266	6.01951	17.2586	16.8165	5.77149	11.9246	12	6	18	17	6	12	middle
1203	nta-MIR6149b-p3	CGATCTGGGTTCGTATCAAAC	up	1.0434	0.0612932	0.919131	700.945	731.366	468.763	503.632	1130.44	1090.11	511.739	592.253	442	502	1179	1102	532	596	middle
1204	PC-3p-327039_11	ATACCATCAACCAAACATAGTATA	down	0.859751	-0.218009	0.920536	1.91763	1.64868	0	0	5.75288	4.94604	0	0	0	0	6	5	0	0	low
1205	nta-miR6151a	TGAATGTGAGGCATTGGATTGA	down	0.93702	-0.093848	0.921665	2.17104	2.03431	4.03009	2.48305	0	1.58273	1.53906	2.98114	3.8	2.475	0	1.6	1.6	3	low
1206	nta-miR395a	CTGAAGTGTTTGGGGGAACTC	up	1.08235	0.114173	0.921671	2.55588	2.76637	2.65137	5.01626	0	4.45144	3.84766	0	2.5	5	0	4.5	4	0	low
1207	stu-MIR8021-p3_2ss21AG22TA	ACTCGAGACCTCTGGTTAAGGAAG	up	1.05931	0.083121	0.92198	3.53593	3.74564	4.2422	3.00975	3.35584	0	5.77149	5.46543	4	3	3.5	0	6	5.5	low
1208	PC-3p-209312_22	AAAAAGAGGTCTCACACAACTAGT	up	1.12676	0.172186	0.925416	2.49877	2.81552	3.18165	0	4.31466	0	0	8.44657	3	0	4.5	0	0	8.5	low
1209	cme-miR530b_R+1	TGCATTTGCACCTACACCTTC	up	1.01717	0.024559	0.925961	69.2559	70.4449	81.6623	76.2471	49.8583	82.1043	58.6768	70.5537	77	76	52	83	61	71	middle
1210	PC-3p-534147_6	TAGGAGCCTTTTGGACTGCAA	up	1.15056	0.202332	0.926164	1.67209	1.92383	0	5.01626	0	0	5.77149	0	0	5	0	0	6	0	low
1211	PC-5p-526060_6	GAGAACTTGCAGCTGAAGAACAGA	up	1.15056	0.202332	0.926164	1.67209	1.92383	0	5.01626	0	0	5.77149	0	0	5	0	0	6	0	low
1212	PC-3p-292322_13	AATAAAGCGACACGTGGAGCAGAA	up	1.15034	0.202055	0.926264	2.0065	2.30815	0	6.01951	0	6.92446	0	0	0	6	0	7	0	0	low
1213	PC-3p-143089_38	AGGTCTCCCACAACTAATGTCAGT	down	0.933381	-0.0994623	0.92959	7.08472	6.61274	11.666	0	9.58813	7.91367	0	11.9246	11	0	10	8	0	12	middle
1214	PC-3p-80372_72	TGAGTGAACCTGGCCAATATC	down	0.954522	-0.0671495	0.929616	6.1608	5.88062	11.1358	3.51138	3.83525	8.40827	6.25245	2.98114	10.5	3.5	4	8.5	6.5	3	middle
1215	PC-5p-116812_48	ACGGTTTGTGGATGGACTTGAGCA	up	1.05516	0.0774611	0.930143	8.6465	9.12344	6.36329	9.02926	10.5469	15.8273	11.543	0	6	9	11	16	12	0	middle
1216	bra-miR168b-3p_L+2	CTCCCGCCTTGCATCAACTGAAT	up	1.07018	0.0978488	0.930857	4.88294	5.22561	0	6.01951	8.62931	0	6.7334	8.94342	0	6	9	0	7	9	low
1217	PC-5p-269092_15	TTTTTGCACGTTTAACAAAGT	down	0.877831	-0.187985	0.931332	2.55683	2.24447	0	0	7.6705	0	6.7334	0	0	0	8	0	7	0	low
1218	PC-5p-182563_27	AGGGCTATGTTGCTCGGACTCTCC	up	1.0685	0.0955856	0.933964	4.24373	4.53442	0	6.01951	6.71169	4.94604	8.65723	0	0	6	7	5	9	0	low
1219	PC-3p-119888_47	AGGCCTCATACAACTAGTGTCAGT	up	1.01195	0.0171382	0.934258	7.7407	7.8332	8.48439	8.02601	6.71169	6.92446	9.61915	6.956	8	8	7	7	10	7	low
1220	stu-miR167a-5p_R+1	TGAAGCTGCCAGCATGATCTAT	up	1.01899	0.0271441	0.936516	371.305	378.357	435.355	285.927	392.634	494.604	254.907	385.561	410.5	285	409.5	500	265	388	middle
1221	PC-3p-266678_15	TTGTTCCGTATGCTTTGTTCC	up	1.12686	0.172308	0.936995	2.34092	2.63789	0	7.02276	0	7.91367	0	0	0	7	0	8	0	0	low
1222	htu-MIR160a-p5	TGCCTGGCTCCCTGTATGCCT	up	1.03358	0.0476472	0.937163	37.9748	39.2499	27.044	24.078	62.8022	36.1061	55.3101	26.3334	25.5	24	65.5	36.5	57.5	26.5	middle
1223	bdi-miR160f_R+1	TGCCTGGCTCCCTGTATGCCT	up	1.03358	0.0476472	0.937163	37.9748	39.2499	27.044	24.078	62.8022	36.1061	55.3101	26.3334	25.5	24	65.5	36.5	57.5	26.5	middle
1224	ata-miR166c-3p_R+2	TCGGACCAGGCTTCATTCCTTTT	up	1.01311	0.0187969	0.937553	113.619	115.109	101.282	105.341	134.234	143.93	100.039	101.359	95.5	105	140	145.5	104	102	middle
1225	nta-MIR6146b-p3	TAAGTGTTCATTGGACAAAGA	down	0.949978	-0.0740333	0.938112	156.34	148.52	172.87	213.693	82.4579	41.5467	313.584	90.428	163	213	86	42	326	91	middle
1226	PC-5p-339381_11	TGGCTAGATCTAACACTCGAG	up	1.12438	0.169125	0.938147	1.76758	1.98743	5.30275	0	0	0	0	5.96228	5	0	0	0	0	6	low
1227	PC-3p-90349_64	TGTTCATGTTATAATTCTCGC	down	0.97597	-0.0350917	0.938877	5.34346	5.21505	3.71192	7.52439	4.79406	3.46223	7.21436	4.96857	3.5	7.5	5	3.5	7.5	5	low
1228	gma-MIR156g-p3_1ss1TC	CTGTGCTCTCTATCTTCTGTC	up	1.0852	0.117957	0.940084	2.55683	2.77467	0	0	7.6705	2.47302	3.3667	2.48428	0	0	8	2.5	3.5	2.5	low
1229	gma-miR6300_R+4_2	GTCGTTGTAGTATAGTGGTGAG	up	1.02968	0.0422019	0.940219	9.05498	9.32377	6.36329	15.0488	5.75288	6.92446	9.61915	11.4277	6	15	6	7	10	11.5	middle
1230	gma-miR6300_R+4_1	GTCGTTGTAGTATAGTGGTAAG	up	1.02968	0.0422019	0.940219	9.05498	9.32377	6.36329	15.0488	5.75288	6.92446	9.61915	11.4277	6	15	6	7	10	11.5	middle
1231	PC-3p-293963_13	TAAGGATAATCTAACTAAGTA	up	1.1186	0.16169	0.94084	2.0065	2.24447	0	6.01951	0	0	6.7334	0	0	6	0	0	7	0	low
1232	aof-MIR5139a-p3	AACCTGGCTCTGATACCAATTGTT	up	1.03141	0.0446136	0.940912	4.13908	4.26908	2.65137	4.01301	5.75288	6.92446	2.40479	3.478	2.5	4	6	7	2.5	3.5	low
1233	PC-5p-98259_58	TAGTGCCACAATACCTGACGTTAT	up	1.0566	0.079434	0.943174	5.04724	5.33293	5.83302	4.51463	4.79406	0	12.0239	3.97486	5.5	4.5	5	0	12.5	4	middle
1234	hex-MIR390a-p5_1ss21GT	TAAGAAGAATAAGCTCAGGAT	up	1.04835	0.0681248	0.94509	106.249	111.386	74.2384	140.957	103.552	52.9226	239.998	41.2391	70	140.5	108	53.5	249.5	41.5	middle
1235	hex-MIR390b-p3_1ss21GT	TAAGAAGAATAAGCTCAGGAT	up	1.04835	0.0681248	0.94509	106.249	111.386	74.2384	140.957	103.552	52.9226	239.998	41.2391	70	140.5	108	53.5	249.5	41.5	middle
1236	stu-miR7997c_L-3_1ss13CT	TTGCTCGGATTCTTCAAAAAT	up	1.01759	0.0251534	0.945118	27.6225	28.1083	25.4532	19.0618	38.3525	32.6439	29.8194	21.8617	24	19	40	33	31	22	middle
1237	nta-MIR6149a-p3	CGGTTTGGGTTCGTATCAAAC	down	0.94133	-0.0872273	0.945233	16.4737	15.5072	10.6055	32.104	6.71169	0	35.5908	10.9309	10	32	7	0	37	11	middle
1238	PC-3p-317009_12	AAACTTCAACTCTAGAGCTAAAGC	down	0.906997	-0.140831	0.948414	2.1211	1.92383	6.36329	0	0	0	5.77149	0	6	0	0	0	6	0	low
1239	PC-5p-357323_10	AGAATTTATGGGATTTTTGAGACG	down	0.906997	-0.140831	0.948414	1.76758	1.60319	5.30275	0	0	0	4.80957	0	5	0	0	0	5	0	low
1240	PC-5p-111352_51	TAAAAAATGCCGCGGTTGCGT	up	1.02007	0.0286724	0.948895	8.32261	8.48967	5.30275	11.0358	8.62931	10.8813	9.61915	4.96857	5	11	9	11	10	5	middle
1241	stu-miR6026-3p_2ss3CT18AC	TTTTTGGCTAGAGTTGTCTTGC	up	1.01447	0.0207297	0.949192	94.4181	95.7846	88.0256	78.2536	116.975	63.8039	106.292	117.258	83	78	122	64.5	110.5	118	middle
1242	nta-miR6151g	TGAGTGTGAGGCGTTGGATTGA	down	0.992131	-0.0113973	0.949712	110.045	109.18	123.024	89.4984	117.614	121.013	95.2296	111.296	116	89.2083	122.667	122.333	99	112	middle
1243	PC-5p-167628_31	TACGAAGGGGACTCCAGTTGG	down	0.953006	-0.0694431	0.951181	5.20255	4.95806	0	6.01951	9.58813	6.92446	0	7.94971	0	6	10	7	0	8	low
1244	PC-3p-231943_19	AATGTGTGAGACAAAAAGAGGCCT	up	1.0508	0.071488	0.952245	4.67793	4.91557	6.36329	0	7.6705	0	4.80957	9.93714	6	0	8	0	5	10	low
1245	PC-5p-235651_19	TTCTCATTGGTGATATCGTGA	down	0.956748	-0.0637897	0.955336	2.07335	1.98367	3.71192	2.50813	0	2.47302	0	3.478	3.5	2.5	0	2.5	0	3.5	low
1246	nta-miR6145a	CATTTTCACATGTAGCACTGAC	up	1.02271	0.0323923	0.955374	336.411	344.049	289.53	489.587	230.115	264.119	544.444	223.586	273	488	240	267	566	225	middle
1247	PC-5p-82960_70	TTTATTAAAGCAATTCGCAGT	up	1.02268	0.0323533	0.955766	5.73829	5.86843	5.83302	8.02601	3.35584	2.47302	8.17627	6.956	5.5	8	3.5	2.5	8.5	7	low
1248	nta-miR156g_L+1	TTGACAGAAGATAGAGAGCAC	up	1.01969	0.0281319	0.956523	7844.57	7999.04	8273.08	8951.18	6309.47	5132.18	12841.9	6023.06	7800.75	8922.17	6580.5	5188.17	13350.3	6061.17	high
1249	bdi-miR169b_R+1_1ss20GC	TAGCCAAGGATGACTTGCCCGG	down	0.96143	-0.0567468	0.95887	18.9767	18.2448	11.666	4.51463	40.7495	32.1493	8.17627	14.4089	11	4.5	42.5	32.5	8.5	14.5	middle
1250	nta-MIR6145f-p3	CAGTGCTCATGCTACGATATC	up	1.00636	0.00914078	0.95916	1375.55	1384.29	1300.23	1295.2	1531.22	1357.19	1161.03	1634.66	1226	1291	1597	1372	1207	1645	high
1251	rgl-miR7972_1ss14TG	TTGTCAGGCTTGTGATTCTCC	up	1.01041	0.0149454	0.959749	7812.03	7893.38	10327.6	7263.54	5844.92	6651.44	8073.35	8955.35	9738	7240	6096	6724	8393	9012	high
1252	PC-3p-343470_10	TCGGGTCGGGTCGAATTGGGT	down	0.932732	-0.100465	0.963136	1.76758	1.64868	5.30275	0	0	4.94604	0	0	5	0	0	5	0	0	low
1253	PC-3p-591689_5	AAACTTTAGCTCTAGATTTGAAGT	down	0.932732	-0.100465	0.963136	1.76758	1.64868	5.30275	0	0	4.94604	0	0	5	0	0	5	0	0	low
1254	stu-MIR8005a-p5_1ss1GT	TTTAGGGTTTAGGGTTTAGGG	up	1.00847	0.0121617	0.964721	97.8422	98.6704	76.3595	97.3154	119.852	74.1906	113.506	108.315	72	97	125	75	118	109	middle
1255	PC-5p-63790_92	TCGTCATATGTAACACTGGCT	down	0.987659	-0.0179149	0.964997	15.2144	15.0266	9.54494	14.0455	22.0527	12.8597	17.3145	14.9057	9	14	23	13	18	15	middle
1256	PC-5p-292321_13	TTTTAACCTCACCCTAGCCACAGT	down	0.949014	-0.0754988	0.965192	4.39224	4.1683	7.42384	0	5.75288	0	12.5049	0	7	0	6	0	13	0	middle
1257	PC-3p-144466_37	ATACCAGTGTCACGTAGGATTGGA	down	0.96391	-0.0530299	0.965205	6.17617	5.95327	0	7.02276	11.5058	5.93525	0	11.9246	0	7	12	6	0	12	middle
1258	nta-MIR167e-p3	GATCATGTAGCAGCATCACC	down	0.984626	-0.0223526	0.965239	186.885	184.012	134.69	243.79	182.174	91.0072	272.222	188.806	127	243	190	92	283	190	middle
1259	PC-5p-90126_64	TTAAAACATGCGCTATACCTTAAC	down	0.974422	-0.0373816	0.96537	12.4143	12.0968	13.7871	10.0325	13.4234	0	14.4287	21.8617	13	10	14	0	15	22	middle
1260	nta-miR6145b_L+2R-1	TATTATCATACGTAGCACTAGC	up	1.01446	0.0207143	0.965439	123.8	125.59	130.448	136.442	104.511	76.169	195.269	105.334	123	136	109	77	203	106	middle
1261	PC-3p-733932_5	ACCTTAGACCTAACTCATCACAAA	down	0.93698	-0.0939091	0.965534	0.883791	0.828095	2.65137	0	0	0	0	2.48428	2.5	0	0	0	0	2.5	low
1262	PC-3p-313590_12	TCAGGTATTGTGGCGTTATAC	down	0.93698	-0.0939091	0.965534	1.06055	0.993714	3.18165	0	0	0	0	2.98114	3	0	0	0	0	3	low
1263	PC-5p-619155_5	ATTTCATGCCACTGTCGTTACACA	down	0.93698	-0.0939091	0.965534	1.76758	1.65619	5.30275	0	0	0	0	4.96857	5	0	0	0	0	5	low
1264	PC-3p-708652_5	ATTTTTTGGAGAGTTCGTGCAACA	down	0.93698	-0.0939091	0.965534	1.76758	1.65619	5.30275	0	0	0	0	4.96857	5	0	0	0	0	5	low
1265	PC-5p-304492_12	AGTTGGTCCATATATGCCCTTGCA	down	0.93698	-0.0939091	0.965534	2.1211	1.98743	6.36329	0	0	0	0	5.96228	6	0	0	0	0	6	low
1266	nta-miR479a	CGTGATATTGGTTTGGCTCATC	up	1.05816	0.0815618	0.970054	2.1211	2.24447	6.36329	0	0	0	6.7334	0	6	0	0	0	7	0	low
1267	stu-MIR8021-p3_2ss5TC17GA	AAACCCGAGACCTCTGATTAAGA	up	1.05816	0.0815618	0.970054	1.06055	1.12223	3.18165	0	0	0	3.3667	0	3	0	0	0	3.5	0	low
1268	PC-5p-122030_46	ATTGTGACATGAAGCACTAGC	down	0.975474	-0.0358254	0.974689	10.7604	10.4965	17.4991	9.02926	5.75288	2.47302	24.0479	4.96857	16.5	9	6	2.5	25	5	middle
1269	stu-MIR8021-p5_2ss23AG24TA	AAACTCGAGACCTCTGGTTAAGGA	down	0.958797	-0.0607026	0.977701	1.17046	1.12223	0	3.51138	0	0	3.3667	0	0	3.5	0	0	3.5	0	low
1270	stu-MIR8021-p3_2ss23AG24TA	AAACTCGAGACCTCTGGTTAAGGA	down	0.958797	-0.0607026	0.977701	1.17046	1.12223	0	3.51138	0	0	3.3667	0	0	3.5	0	0	3.5	0	low
1271	PC-5p-259470_16	AACTCTCCCTTGATGAATGATGTA	down	0.958797	-0.0607026	0.977701	1.33767	1.28255	0	4.01301	0	0	3.84766	0	0	4	0	0	4	0	low
1272	PC-3p-101231_57	TCGATCGCCATAATCAATTAA	down	0.977219	-0.0332469	0.978421	13.3552	13.051	15.9082	15.0488	9.10872	2.47302	32.7051	3.97486	15	15	9.5	2.5	34	4	middle
1273	PC-3p-153057_34	AAAAGAGGCCTCACACAACTAGTA	up	1.01988	0.0283997	0.98059	6.47943	6.60824	12.7266	0	6.71169	10.8813	0	8.94342	12	0	7	11	0	9	middle
1274	PC-3p-25534_207	AAGACTTGAGCCTGTACTTGTGAT	down	0.99151	-0.0123001	0.980618	33.3074	33.0246	19.6202	27.0878	53.2141	28.687	35.1099	35.2768	18.5	27	55.5	29	36.5	35.5	middle
1275	PC-3p-78405_74	AATCCTAGCCCTCCATTTGTC	down	0.989611	-0.0150671	0.981602	12.3021	12.1743	11.666	7.02276	18.2174	18.795	4.80957	12.9183	11	7	19	19	5	13	middle
1276	PC-5p-66415_88	CAGTGTTTCATGCATCACAAGA	down	0.992145	-0.0113778	0.982378	19.8288	19.6731	16.9688	29.0943	13.4234	13.8489	16.3525	28.8177	16	29	14	14	17	29	middle
1277	mtr-miR172b_L+1	AAGAATCTTGATGATGCTGCAT	up	1.0317	0.0450253	0.983455	1.91763	1.97842	0	0	5.75288	5.93525	0	0	0	0	6	6	0	0	low
1278	PC-5p-544650_5	ATGGGTTGTATTTGGGCTACTCAA	up	1.0317	0.0450253	0.983455	1.59802	1.64868	0	0	4.79406	4.94604	0	0	0	0	5	5	0	0	low
1279	stu-MIR5303d-p3_2ss5AG20AG	AAATGCACTACTTTTGGAGGATCC	down	0.990212	-0.0141913	0.983529	34.6713	34.332	39.2403	12.039	52.7347	15.8273	38.4766	48.692	37	12	55	16	40	49	middle
1280	ath-miR396b-3p_2ss2CT20AG	GTTCAAGAAAGCTGTGGGAGA	up	1.01367	0.0195827	0.986489	2.25011	2.28086	4.2422	2.50813	0	3.95683	2.88574	0	4	2.5	0	4	3	0	low
1281	PC-3p-3219_739	TGTCTACTAAAATGGAACGAG	down	0.988384	-0.0168568	0.986884	61.3419	60.6294	57.7999	89.791	36.4349	13.3543	132.263	36.2706	54.5	89.5	38	13.5	137.5	36.5	middle
1282	cme-MIR160c-p5_2ss13AG17AG	AGCCATGCATGTGTAAGT	down	0.987856	-0.0176267	0.987154	3.61643	3.57251	5.83302	5.01626	0	4.94604	5.77149	0	5.5	5	0	5	6	0	low
1283	PC-5p-123691_45	ATAATGTCAGTCATTTGGAGT	up	1.01097	0.015742	0.988137	7.35756	7.43828	7.42384	6.01951	8.62931	0	16.3525	5.96228	7	6	9	0	17	6	middle
1284	nta-MIR167d-p3	ATTAGATCATGTGGTAGCTTCACC	down	0.998703	-0.00187227	0.990871	461.339	460.741	461.339	504.636	418.042	426.349	543.482	412.391	435	503	436	431	565	415	middle
1285	sly-MIR319c-p5_1ss9AC	AGCTGCCGCCTCATTCATCCA	up	1.00476	0.0068485	0.991416	18.6106	18.6991	12.1963	11.0358	32.5996	21.7626	13.4668	20.868	11.5	11	34	22	14	21	middle
1286	PC-3p-644862_5	TCCTATCCTTCCATTTTATCCGAA	down	0.986002	-0.0203373	0.992525	0.836043	0.82434	0	2.50813	0	2.47302	0	0	0	2.5	0	2.5	0	0	low
1287	PC-5p-358686_10	ACATTTCGCTAAGGGACTTCGTGT	down	0.986002	-0.0203373	0.992525	1.67209	1.64868	0	5.01626	0	4.94604	0	0	0	5	0	5	0	0	low
1288	PC-3p-624977_5	TTCCGTTTTATCTAGTTCACTTAA	down	0.986002	-0.0203373	0.992525	1.67209	1.64868	0	5.01626	0	4.94604	0	0	0	5	0	5	0	0	low
1289	PC-5p-352143_10	ATATATACTGGAGTTTGGAGCACC	down	0.990493	-0.0137811	0.994934	1.67209	1.65619	0	5.01626	0	0	0	4.96857	0	5	0	0	0	5	low
1290	PC-5p-362905_10	ATTTTCGAACTTAGGACACGATGT	up	1.00324	0.00465998	0.998287	1.59802	1.60319	0	0	4.79406	0	4.80957	0	0	0	5	0	5	0	low
1291	nta-MIR6160-p5	ATATGGGCCAACTGTGTAACTCTA	up	1.0001	0.000141357	0.998368	256.991	257.016	250.29	260.845	259.838	262.14	236.631	272.278	236	260	271	265	246	274	middle
