# Supplementary material for: Small RNA and Degradome Sequencing Reveal Important MicroRNA Function in Nicotiana tabacum Response to Bemisia tabaci
Source: MDPI journal article supplement (doi:10.3390/genes13020361), 2022-02-17
Supplement: s1 [file Supplementary Data S4. Degradome sequencing results_20220216.xlsx]

## Sheet: Sheet1
SiteID	Query	Transcript	gene_id	gene_name	Description	GO	KEGG	TStop	TSlice	MFEratio	AllenScore	Structure	Sequence	DegradomeRawReads	DegradomeNormReads	DegradomeCategory	DegradomePval	Tplot_file_path
XM_016578619.1:1549	nta-miR166a	XM_016578619.1	107760551	LOC107760551	PREDICTED: homeobox-leucine zipper protein ATHB-15-like isoform X1 [Nicotiana tabacum]	GO:0003677(DNA binding);GO:0003700(transcription factor activity, sequence-specific DNA binding);GO:0005634(nucleus);GO:0006351(transcription, DNA-templated);GO:0006355(regulation of transcription, DNA-templated);GO:0008289(lipid binding);GO:0009855(determination of bilateral symmetry);GO:0009887(organ morphogenesis);GO:0009965(leaf morphogenesis);GO:0010014(meristem initiation);GO:0010073(merist…	NA	1558	1549	0.85941	3	..((((((((((((((((((.&.))))))))))))))))))..	CUGGAAUGAAGCCUGGUCCGG&UCGGACCAGGCUUCAUUCCCC	51	4910.46	0	0.000289548	Output/DS_TL/cleaveLand_result/t_plot/nta-miR166a_XM_016578619.1_1549_TPlot.pdf
XM_016582024.1:1066	nta-miR171b	XM_016582024.1	107763537	LOC107763537	PREDICTED: scarecrow-like protein 6 isoform X1 [Nicotiana tabacum]	GO:0003700(transcription factor activity, sequence-specific DNA binding);GO:0005634(nucleus);GO:0006355(regulation of transcription, DNA-templated);GO:0030154(cell differentiation);GO:0043565(sequence-specific DNA binding);GO:0043565(sequence-specific DNA binding)	04075(Plant hormone signal transduction);04075(Plant hormone signal transduction)	1075	1066	0.918782	2	..(((((((((((((((((((&)))))))))))))))))))..	AAUGAUAUUGGCGCGGCUCAA&UUGAGCCGCGCCAAUAUCACU	6	577.701	0	0.000289548	Output/DS_TL/cleaveLand_result/t_plot/nta-miR171b_XM_016582024.1_1066_TPlot.pdf
XM_016612746.1:527	nta-miR168d	XM_016612746.1	MSTRG.19192	LOC107790785	PREDICTED: protein argonaute 1-like isoform X2 [Nicotiana tabacum]	GO:0005515(protein binding);GO:0005515(protein binding)	NA	536	527	0.800915	6	..(((((.(((((((((((..&..))))))))))).)))))..	UACCCGAGCUGCACCAAGCAA&UCGCUUGGUGCAGGUCGGGAA	66	6354.71	0	0.000289548	Output/DS_TL/cleaveLand_result/t_plot/nta-miR168d_XM_016612746.1_527_TPlot.pdf
XM_016624148.1:161	nta-miR6019a	XM_016624148.1	107800887	LOC107800887	PREDICTED: TMV resistance protein N-like isoform X1 [Nicotiana sylvestris]	GO:0005515(protein binding)	03040(Spliceosome);04141(Protein processing in endoplasmic reticulum);04144(Endocytosis)	170	161	1	1	((((((((((((((((((((((&))))))))))))))))))))))	AAACAUUUACGAGUCACCUGUA&UACAGGUGACUUGUAAAUGUUU	81	7798.96	0	0.000289548	Output/DS_TL/cleaveLand_result/t_plot/nta-miR6019a_XM_016624148.1_161_TPlot.pdf
XM_016625653.1:3425	nta-miR162a	XM_016625653.1	MSTRG.22768	LOC107802196	PREDICTED: endoribonuclease Dicer homolog 1 [Nicotiana tabacum]	GO:0003723(RNA binding);GO:0004525(ribonuclease III activity);GO:0005634(nucleus);GO:0005737(cytoplasm);GO:0016442(RISC complex);GO:0030422(production of siRNA involved in RNA interference)	03008(Ribosome biogenesis in eukaryotes)	3435	3425	0.944	2	((((((((((((((.(((((((&)))))))-))))))))))))))	CUGGAUGCAGAGGUAUUAUCGA&UCGAUAA-ACCUCUGCAUCCAG	38	3658.77	0	0.000289548	Output/DS_TL/cleaveLand_result/t_plot/nta-miR162a_XM_016625653.1_3425_TPlot.pdf
XM_016649509.1:1279	nta-miR394	XM_016649509.1	107822920	LOC107822920	PREDICTED: F-box only protein 6-like [Nicotiana tabacum]	GO:0004842(ubiquitin-protein transferase activity);GO:0010305(leaf vascular tissue pattern formation);GO:0010928(regulation of auxin mediated signaling pathway);GO:0019005(SCF ubiquitin ligase complex);GO:0031146(SCF-dependent proteasomal ubiquitin-dependent protein catabolic process);GO:0060776(simple leaf morphogenesis)	NA	1288	1279	0.875	1	((((((.(((((((((((((&))))))))))))).))))))	GGAGGUUGACAGAAUGCCAA&UUGGCAUUCUGUCCACCUCC	108	10398.6	0	0.000289548	Output/DS_TL/cleaveLand_result/t_plot/nta-miR394_XM_016649509.1_1279_TPlot.pdf
XM_016659412.1:607	nta-miR6024	XM_016659412.1	107831631	LOC107831631	PREDICTED: putative disease resistance protein RGA3, partial [Nicotiana sylvestris]	GO:0005515(protein binding);GO:0005524(ATP binding);GO:0005576(extracellular region);GO:0006952(defense response);GO:0043531(ADP binding)	03040(Spliceosome)	616	607	1	1	((((((((((((((((((((((&))))))))))))))))))))))	GGGAAAACAACUCUGGCUAAGA&UUUUAGCCAGAGUUGUUUUCCC	17	1636.82	0	0.000289548	Output/DS_TL/cleaveLand_result/t_plot/nta-miR6024_XM_016659412.1_607_TPlot.pdf
XR_001643794.1:1460	nta-miR160a	XR_001643794.1	107766885	LOC107766885	PREDICTED: auxin response factor 17 [Nicotiana tomentosiformis]	GO:0000987(core promoter proximal region sequence-specific DNA binding);GO:0003700(transcription factor activity, sequence-specific DNA binding);GO:0005634(nucleus);GO:0006351(transcription, DNA-templated);GO:0006355(regulation of transcription, DNA-templated);GO:0009555(pollen development);GO:0009653(anatomical structure morphogenesis);GO:0009734(auxin-activated signaling pathway);GO:0010208(pol…	04075(Plant hormone signal transduction);04075(Plant hormone signal transduction)	1469	1460	1	1.5	.((((((((((((((((((((&)))))))))))))))))))).	GGGCAUGCAGGGAGCCAGGCA&UGCCUGGCUCCCUGUAUGCCA	65	6258.42	0	0.000289548	Output/DS_TL/cleaveLand_result/t_plot/nta-miR160a_XR_001643794.1_1460_TPlot.pdf
XR_001655580.1:267	nta-miR6149a	XR_001655580.1	107819001	LOC107819001	PREDICTED: F-box/kelch-repeat protein At3g06240-like [Nicotiana attenuata]	GO:0003674(molecular_function);GO:0005634(nucleus);GO:0008150(biological_process)	00970(Aminoacyl-tRNA biosynthesis)	276	267	0.889744	1	(((.(((((((((((((((((&))))))))))))))))).)))	GCCAAUUCAGGUGCGUAUCAA&UUGAUACGCACCUGAAUCGGC	47	4525.32	0	0.000289548	Output/DS_TL/cleaveLand_result/t_plot/nta-miR6149a_XR_001655580.1_267_TPlot.pdf
XM_016640390.1:684	nta-miR6147	XM_016640390.1	107814885	LOC107814885	PREDICTED: putative late blight resistance protein homolog R1C-3 [Nicotiana tabacum]	GO:0005524(ATP binding);GO:0005575(cellular_component);GO:0006952(defense response);GO:0043531(ADP binding)	04626(Plant-pathogen interaction)	693	684	0.911504	2.5	(((((((((((((.(((((((&))))))).)))))))))))))	UGGUGGGUUUUGACGAUGUCA&UGACAUCUUCAAAACCCACUA	2	192.567	1	0.000411288	Output/DS_TL/cleaveLand_result/t_plot/nta-miR6147_XM_016640390.1_684_TPlot.pdf
MSTRG.3125.3:2731	nta-miR172a_R-1	MSTRG.3125.3	MSTRG.3125	LOC107814784	PREDICTED: ethylene-responsive transcription factor RAP2-7-like isoform X2 [Nicotiana tabacum]	GO:0003677(DNA binding);GO:0003700(transcription factor activity, sequence-specific DNA binding);GO:0005634(nucleus);GO:0006351(transcription, DNA-templated);GO:0006355(regulation of transcription, DNA-templated);GO:0009908(flower development);GO:0010073(meristem maintenance);GO:0010093(specification of floral organ identity);GO:0019953(sexual reproduction);GO:0030154(cell differentiation);GO:004…	04075(Plant hormone signal transduction);04075(Plant hormone signal transduction)	2740	2731	1	1	((((((((((((((((((((&))))))))))))))))))))	UGCAGCAUCAUCAGGAUUCU&AGAAUCUUGAUGAUGCUGCA	14	1347.97	0	0.000579012	Output/DS_TL/cleaveLand_result/t_plot/nta-miR172a_R-1_MSTRG.3125.3_2731_TPlot.pdf
XM_016579417.1:4780	nta-miR6019a	XM_016579417.1	107761218	LOC107761218	PREDICTED: LOW QUALITY PROTEIN: uncharacterized protein LOC107761218, partial [Nicotiana tabacum]	GO:0005515(protein binding)	03040(Spliceosome);04141(Protein processing in endoplasmic reticulum);04144(Endocytosis)	4789	4780	1	1	((((((((((((((((((((((&))))))))))))))))))))))	AAACAUUUACGAGUCACCUGUA&UACAGGUGACUUGUAAAUGUUU	70	6739.84	0	0.000579012	Output/DS_TL/cleaveLand_result/t_plot/nta-miR6019a_XM_016579417.1_4780_TPlot.pdf
XM_016581150.1:813	nta-miR164c	XM_016581150.1	MSTRG.1024	LOC107762763	PREDICTED: NAC domain-containing protein 21/22-like [Nicotiana tabacum]	GO:0003677(DNA binding);GO:0003700(transcription factor activity, sequence-specific DNA binding);GO:0005634(nucleus);GO:0006351(transcription, DNA-templated);GO:0006355(regulation of transcription, DNA-templated);GO:0007275(multicellular organism development);GO:0009734(auxin-activated signaling pathway);GO:0010072(primary shoot apical meristem specification);GO:0048527(lateral root development)	03018(RNA degradation)	822	813	0.927739	1	((((.((((((((((((((((&)))))))))))))))).))))	AGCAAGUGCCCUGCUUCUCCA&UGGAGAAGCAGGGCACAUGCU	5	481.417	0	0.000579012	Output/DS_TL/cleaveLand_result/t_plot/nta-miR164c_XM_016581150.1_813_TPlot.pdf
XM_016585764.1:1461	nta-miR160d	XM_016585764.1	107766885	LOC107766885	PREDICTED: auxin response factor 17 [Nicotiana tomentosiformis]	GO:0000987(core promoter proximal region sequence-specific DNA binding);GO:0003700(transcription factor activity, sequence-specific DNA binding);GO:0005634(nucleus);GO:0006351(transcription, DNA-templated);GO:0006355(regulation of transcription, DNA-templated);GO:0009555(pollen development);GO:0009653(anatomical structure morphogenesis);GO:0009734(auxin-activated signaling pathway);GO:0010208(pol…	04075(Plant hormone signal transduction);04075(Plant hormone signal transduction)	1470	1461	1	1	.((((((((((((((((((((&)))))))))))))))))))).	GGGCAUGCAGGGAGCCAGGCA&UGCCUGGCUCCCUGCAUGCCA	73	7028.69	0	0.000579012	Output/DS_TL/cleaveLand_result/t_plot/nta-miR160d_XM_016585764.1_1461_TPlot.pdf
XM_016599515.1:1358	nta-miR159	XM_016599515.1	107779158	LOC107779158	PREDICTED: transcription factor GAMYB-like isoform X1 [Nicotiana tabacum]	GO:0003677(DNA binding);GO:0003700(transcription factor activity, sequence-specific DNA binding);GO:0005634(nucleus);GO:0006355(regulation of transcription, DNA-templated);GO:0009723(response to ethylene);GO:0009740(gibberellic acid mediated signaling pathway);GO:0009751(response to salicylic acid);GO:0043068(positive regulation of programmed cell death);GO:0045893(positive regulation of transcri…	04626(Plant-pathogen interaction);04626(Plant-pathogen interaction)	1367	1358	0.917808	2.5	((((((((((((((.((((((&)))))).))))))))))))))	UGGAGCUCCCUUCACUCCAAA&UUUGGAUUGAAGGGAGCUCUA	3	288.85	0	0.000579012	Output/DS_TL/cleaveLand_result/t_plot/nta-miR159_XM_016599515.1_1358_TPlot.pdf
XM_016603412.1:3601	nta-miR6025e	XM_016603412.1	107782528	LOC107782528	PREDICTED: uncharacterized protein LOC107782528, partial [Nicotiana tabacum]	GO:0005524(ATP binding);GO:0006952(defense response);GO:0043531(ADP binding)	04626(Plant-pathogen interaction)	3610	3601	0.807365	5	(((((((((((.((.(((((((&))))))).)).)))))))))))	GAUGUCAUCUCAAUCGUUGGCA&UGCCAAUUAUAGAGAUGACAUC	13	1251.68	0	0.000579012	Output/DS_TL/cleaveLand_result/t_plot/nta-miR6025e_XM_016603412.1_3601_TPlot.pdf
XM_016603592.1:1500	nta-miR166a	XM_016603592.1	107782674	LOC107782674	PREDICTED: homeobox-leucine zipper protein ATHB-15-like isoform X1 [Nicotiana tomentosiformis]	GO:0003677(DNA binding);GO:0003700(transcription factor activity, sequence-specific DNA binding);GO:0005634(nucleus);GO:0006351(transcription, DNA-templated);GO:0006355(regulation of transcription, DNA-templated);GO:0008289(lipid binding);GO:0009855(determination of bilateral symmetry);GO:0009887(organ morphogenesis);GO:0009965(leaf morphogenesis);GO:0010014(meristem initiation);GO:0010073(merist…	NA	1509	1500	0.85941	3	..((((((((((((((((((.&.))))))))))))))))))..	CUGGAAUGAAGCCUGGUCCGG&UCGGACCAGGCUUCAUUCCCC	53	5103.02	0	0.000579012	Output/DS_TL/cleaveLand_result/t_plot/nta-miR166a_XM_016603592.1_1500_TPlot.pdf
XM_016612747.1:527	nta-miR168a	XM_016612747.1	#N/A	#N/A	#N/A	#N/A	#N/A	536	527	0.786344	5	((.(((((.(((((((((((..&..))))))))))).)))))-))	GUACCCGAGCUGCACCAAGCAA&UCGCUUGGUGCAGGUCGGG-AC	54	5199.31	0	0.000579012	Output/DS_TL/cleaveLand_result/t_plot/nta-miR168a_XM_016612747.1_527_TPlot.pdf
XM_016631827.1:1384	nta-miR171b	XM_016631827.1	MSTRG.24455	LOC107807449	PREDICTED: scarecrow-like protein 22 [Nicotiana tabacum]	GO:0003700(transcription factor activity, sequence-specific DNA binding);GO:0005634(nucleus);GO:0006355(regulation of transcription, DNA-templated);GO:0030154(cell differentiation);GO:0043565(sequence-specific DNA binding)	04075(Plant hormone signal transduction)	1393	1384	0.918782	2	..(((((((((((((((((((&)))))))))))))))))))..	AAUGAUAUUGGCGCGGCUCAA&UUGAGCCGCGCCAAUAUCACU	14	1347.97	0	0.000579012	Output/DS_TL/cleaveLand_result/t_plot/nta-miR171b_XM_016631827.1_1384_TPlot.pdf
XM_016655250.1:1487	nta-miR160a	XM_016655250.1	107828000	LOC107828000	PREDICTED: auxin response factor 18-like [Nicotiana tabacum]	GO:0003677(DNA binding);GO:0003700(transcription factor activity, sequence-specific DNA binding);GO:0005634(nucleus);GO:0006351(transcription, DNA-templated);GO:0006355(regulation of transcription, DNA-templated);GO:0007389(pattern specification process);GO:0009734(auxin-activated signaling pathway);GO:0009738(abscisic acid-activated signaling pathway);GO:0009743(response to carbohydrate);GO:0010…	04075(Plant hormone signal transduction);04075(Plant hormone signal transduction)	1496	1487	1	1	.((((((((((((((((((((&)))))))))))))))))))).	AGGCAUACAGGGAGCCAGGCA&UGCCUGGCUCCCUGUAUGCCA	36	3466.2	0	0.000579012	Output/DS_TL/cleaveLand_result/t_plot/nta-miR160a_XM_016655250.1_1487_TPlot.pdf
XM_016589328.1:1020	nta-miR159	XM_016589328.1	107770063	LOC107770063	PREDICTED: transcription factor GAMYB-like, partial [Nicotiana tabacum]	GO:0003677(DNA binding);GO:0003700(transcription factor activity, sequence-specific DNA binding);GO:0005634(nucleus);GO:0006355(regulation of transcription, DNA-templated);GO:0009723(response to ethylene);GO:0009740(gibberellic acid mediated signaling pathway);GO:0009751(response to salicylic acid);GO:0043068(positive regulation of programmed cell death);GO:0045893(positive regulation of transcri…	04626(Plant-pathogen interaction)	1029	1020	0.917808	2.5	((((((((((((((.((((((&)))))).))))))))))))))	UGGAGCUCCCUUCACUCCAAA&UUUGGAUUGAAGGGAGCUCUA	13	1251.68	0	0.000868392	Output/DS_TL/cleaveLand_result/t_plot/nta-miR159_XM_016589328.1_1020_TPlot.pdf
XM_016617541.1:306	nta-miR6025a	XM_016617541.1	107794982	LOC107794982	PREDICTED: putative late blight resistance protein homolog R1A-10 [Nicotiana tabacum]	GO:0005524(ATP binding);GO:0005634(nucleus);GO:0005737(cytoplasm);GO:0005886(plasma membrane);GO:0006952(defense response);GO:0009626(plant-type hypersensitive response);GO:0009814(defense response, incompatible interaction);GO:0043531(ADP binding)	04626(Plant-pathogen interaction)	315	306	0.963077	4	((((((((((((((((((((..&..))))))))))))))))))))	GAUGUUAUCUCGAUUGUUGGAA&UACCAACAAUUGAGAUAACAUC	167	16079.3	0	0.000868392	Output/DS_TL/cleaveLand_result/t_plot/nta-miR6025a_XM_016617541.1_306_TPlot.pdf
XM_016618037.1:1379	nta-miR169a_1ss7AG	XM_016618037.1	MSTRG.20705	LOC107795403	PREDICTED: nuclear transcription factor Y subunit A-3-like [Nicotiana tabacum]	GO:0003677(DNA binding);GO:0003700(transcription factor activity, sequence-specific DNA binding);GO:0005634(nucleus);GO:0006351(transcription, DNA-templated);GO:0006355(regulation of transcription, DNA-templated);GO:0016602(CCAAT-binding factor complex);GO:0016602(CCAAT-binding factor complex)	00970(Aminoacyl-tRNA biosynthesis);00970(Aminoacyl-tRNA biosynthesis)	1388	1379	0.763098	3.5	(((((((.((((((((((((.&.)))))))))))).)))))))	UCGGCAGUUCAUCCUUGGCUA&CAGCCAGGGAUGACUUGCCGA	12	1155.4	0	0.000868392	Output/DS_TL/cleaveLand_result/t_plot/nta-miR169a_1ss7AG_XM_016618037.1_1379_TPlot.pdf
XM_016627031.1:1429	nta-miR172a_R-1	XM_016627031.1	107803338	LOC107803338	PREDICTED: ethylene-responsive transcription factor RAP2-7-like isoform X2 [Nicotiana tabacum]	GO:0003677(DNA binding);GO:0003700(transcription factor activity, sequence-specific DNA binding);GO:0005634(nucleus);GO:0006351(transcription, DNA-templated);GO:0006355(regulation of transcription, DNA-templated);GO:0009908(flower development);GO:0010073(meristem maintenance);GO:0010093(specification of floral organ identity);GO:0019953(sexual reproduction);GO:0030154(cell differentiation);GO:004…	04075(Plant hormone signal transduction);04075(Plant hormone signal transduction)	1438	1429	1	2	(((((((((((((((((((.&.)))))))))))))))))))	UGCAGCAUCAUCAGGAUUCG&AGAAUCUUGAUGAUGCUGCA	7	673.984	0	0.000868392	Output/DS_TL/cleaveLand_result/t_plot/nta-miR172a_R-1_XM_016627031.1_1429_TPlot.pdf
XM_016630482.1:527	nta-miR168a	XM_016630482.1	MSTRG.24089	LOC107806342	PREDICTED: protein argonaute 1-like isoform X1 [Nicotiana tabacum]	GO:0005515(protein binding);GO:0005515(protein binding)	NA	536	527	0.786344	5	((.(((((.(((((((((((..&..))))))))))).)))))-))	GUACCCGAGCUGCACCAAGCAA&UCGCUUGGUGCAGGUCGGG-AC	47	4525.32	0	0.000868392	Output/DS_TL/cleaveLand_result/t_plot/nta-miR168a_XM_016630482.1_527_TPlot.pdf
XM_016641934.1:2164	nta-miR160d	XM_016641934.1	107816234	LOC107816234	PREDICTED: auxin response factor 18-like isoform X1 [Nicotiana tabacum]	GO:0003677(DNA binding);GO:0003700(transcription factor activity, sequence-specific DNA binding);GO:0005634(nucleus);GO:0006351(transcription, DNA-templated);GO:0006355(regulation of transcription, DNA-templated);GO:0007389(pattern specification process);GO:0009733(response to auxin);GO:0009734(auxin-activated signaling pathway);GO:0035198(miRNA binding);GO:0048829(root cap development);GO:005130…	04075(Plant hormone signal transduction);04075(Plant hormone signal transduction)	2173	2164	1	0	(((((((((((((((((((((&)))))))))))))))))))))	UGGCAUGCAGGGAGCCAGGCA&UGCCUGGCUCCCUGCAUGCCA	21	2021.95	0	0.000868392	Output/DS_TL/cleaveLand_result/t_plot/nta-miR160d_XM_016641934.1_2164_TPlot.pdf
XM_016643130.1:1546	nta-miR166a	XM_016643130.1	107817328	LOC107817328	PREDICTED: homeobox-leucine zipper protein ATHB-15-like [Nicotiana tabacum]	GO:0003677(DNA binding);GO:0003700(transcription factor activity, sequence-specific DNA binding);GO:0005634(nucleus);GO:0006351(transcription, DNA-templated);GO:0006355(regulation of transcription, DNA-templated);GO:0008289(lipid binding);GO:0009855(determination of bilateral symmetry);GO:0009887(organ morphogenesis);GO:0009965(leaf morphogenesis);GO:0010014(meristem initiation);GO:0010073(merist…	NA	1555	1546	0.85941	3	..((((((((((((((((((.&.))))))))))))))))))..	CUGGAAUGAAGCCUGGUCCGG&UCGGACCAGGCUUCAUUCCCC	43	4140.19	0	0.000868392	Output/DS_TL/cleaveLand_result/t_plot/nta-miR166a_XM_016643130.1_1546_TPlot.pdf
XM_016644582.1:161	nta-miR6019a	XM_016644582.1	#N/A	#N/A	#N/A	#N/A	#N/A	170	161	1	1	((((((((((((((((((((((&))))))))))))))))))))))	AAACAUUUACGAGUCACCUGUA&UACAGGUGACUUGUAAAUGUUU	69	6643.56	0	0.000868392	Output/DS_TL/cleaveLand_result/t_plot/nta-miR6019a_XM_016644582.1_161_TPlot.pdf
XM_016578617.1:1549	nta-miR166a	XM_016578617.1	107760551	LOC107760551	PREDICTED: homeobox-leucine zipper protein ATHB-15-like isoform X1 [Nicotiana tabacum]	GO:0003677(DNA binding);GO:0003700(transcription factor activity, sequence-specific DNA binding);GO:0005634(nucleus);GO:0006351(transcription, DNA-templated);GO:0006355(regulation of transcription, DNA-templated);GO:0008289(lipid binding);GO:0009855(determination of bilateral symmetry);GO:0009887(organ morphogenesis);GO:0009965(leaf morphogenesis);GO:0010014(meristem initiation);GO:0010073(merist…	NA	1558	1549	0.85941	3	..((((((((((((((((((.&.))))))))))))))))))..	CUGGAAUGAAGCCUGGUCCGG&UCGGACCAGGCUUCAUUCCCC	45	4332.76	0	0.00115769	Output/DS_TL/cleaveLand_result/t_plot/nta-miR166a_XM_016578617.1_1549_TPlot.pdf
XM_016599465.1:232	nta-miR6149a	XM_016599465.1	107779123	LOC107779123	PREDICTED: F-box/kelch-repeat protein At3g23880-like [Nicotiana tabacum]	GO:0004842(ubiquitin-protein transferase activity);GO:0019005(SCF ubiquitin ligase complex);GO:0031146(SCF-dependent proteasomal ubiquitin-dependent protein catabolic process);GO:0031146(SCF-dependent proteasomal ubiquitin-dependent protein catabolic process)	00970(Aminoacyl-tRNA biosynthesis);00970(Aminoacyl-tRNA biosynthesis)	241	232	0.838462	3	..(((((((((((((((((((&)))))))))))))))))))..	UACGAUUCAGGUGUGUAUCAA&UUGAUACGCACCUGAAUCGGC	6	577.701	0	0.00115769	Output/DS_TL/cleaveLand_result/t_plot/nta-miR6149a_XM_016599465.1_232_TPlot.pdf
XM_016612555.1:1351	nta-miR159	XM_016612555.1	#N/A	#N/A	#N/A	#N/A	#N/A	1360	1351	0.90411	3.5	.(((((((((((((.((((((&)))))).))))))))))))).	AGGAGCUCCCUUCACUCCAAA&UUUGGAUUGAAGGGAGCUCUA	7	673.984	0	0.00115769	Output/DS_TL/cleaveLand_result/t_plot/nta-miR159_XM_016612555.1_1351_TPlot.pdf
XM_016630483.1:527	nta-miR168d	XM_016630483.1	MSTRG.24089	LOC107806342	PREDICTED: protein argonaute 1-like isoform X1 [Nicotiana tabacum]	GO:0005515(protein binding);GO:0005515(protein binding)	NA	536	527	0.800915	6	..(((((.(((((((((((..&..))))))))))).)))))..	UACCCGAGCUGCACCAAGCAA&UCGCUUGGUGCAGGUCGGGAA	55	5295.59	0	0.00115769	Output/DS_TL/cleaveLand_result/t_plot/nta-miR168d_XM_016630483.1_527_TPlot.pdf
XM_016631828.1:1234	nta-miR171b	XM_016631828.1	107807450	LOC107807450	PREDICTED: scarecrow-like protein 6 [Nicotiana tabacum]	GO:0003700(transcription factor activity, sequence-specific DNA binding);GO:0005634(nucleus);GO:0006355(regulation of transcription, DNA-templated);GO:0030154(cell differentiation);GO:0043565(sequence-specific DNA binding)	04075(Plant hormone signal transduction)	1243	1234	0.918782	2	..(((((((((((((((((((&)))))))))))))))))))..	AAUGAUAUUGGCGCGGCUCAA&UUGAGCCGCGCCAAUAUCACU	11	1059.12	0	0.00115769	Output/DS_TL/cleaveLand_result/t_plot/nta-miR171b_XM_016631828.1_1234_TPlot.pdf
XR_001643055.1:1237	nta-miR171c	XR_001643055.1	#N/A	#N/A	#N/A	#N/A	#N/A	1246	1237	1	1	(((((((((((((((((((((&)))))))))))))))))))))	GAUAUUGGCGCGGCUCAAUCA&UGAUUGAGCCGUGCCAAUAUC	6	577.701	0	0.00115769	Output/DS_TL/cleaveLand_result/t_plot/nta-miR171c_XR_001643055.1_1237_TPlot.pdf
XR_001643507.1:1455	nta-miR160d	XR_001643507.1	107765789	LOC107765789	PREDICTED: auxin response factor 17 [Nicotiana sylvestris]	GO:0000987(core promoter proximal region sequence-specific DNA binding);GO:0003700(transcription factor activity, sequence-specific DNA binding);GO:0005634(nucleus);GO:0006351(transcription, DNA-templated);GO:0006355(regulation of transcription, DNA-templated);GO:0009555(pollen development);GO:0009653(anatomical structure morphogenesis);GO:0009734(auxin-activated signaling pathway);GO:0010208(pol…	04075(Plant hormone signal transduction);04075(Plant hormone signal transduction)	1464	1455	1	1	.((((((((((((((((((((&)))))))))))))))))))).	GGGCAUGCAGGGAGCCAGGCA&UGCCUGGCUCCCUGCAUGCCA	56	5391.87	0	0.00115769	Output/DS_TL/cleaveLand_result/t_plot/nta-miR160d_XR_001643507.1_1455_TPlot.pdf
XM_016582022.1:1311	nta-miR171b	XM_016582022.1	107763536	LOC107763536	PREDICTED: scarecrow-like protein 6 isoform X2 [Nicotiana tabacum]	GO:0003700(transcription factor activity, sequence-specific DNA binding);GO:0005634(nucleus);GO:0006355(regulation of transcription, DNA-templated);GO:0030154(cell differentiation);GO:0043565(sequence-specific DNA binding);GO:0043565(sequence-specific DNA binding)	04075(Plant hormone signal transduction);04075(Plant hormone signal transduction)	1320	1311	0.918782	2	..(((((((((((((((((((&)))))))))))))))))))..	AAUGAUAUUGGCGCGGCUCAA&UUGAGCCGCGCCAAUAUCACU	10	962.835	1	0.00123336	Output/DS_TL/cleaveLand_result/t_plot/nta-miR171b_XM_016582022.1_1311_TPlot.pdf
XM_016619769.1:1782	nta-miR172c	XM_016619769.1	MSTRG.21143	LOC107796949	PREDICTED: ethylene-responsive transcription factor RAP2-7-like isoform X1 [Nicotiana tabacum]	GO:0003677(DNA binding);GO:0003700(transcription factor activity, sequence-specific DNA binding);GO:0005634(nucleus);GO:0006351(transcription, DNA-templated);GO:0006355(regulation of transcription, DNA-templated);GO:0009908(flower development);GO:0010073(meristem maintenance);GO:0010093(specification of floral organ identity);GO:0019953(sexual reproduction);GO:0030154(cell differentiation);GO:004…	NA	1791	1782	0.997085	2	.((((((((((((((((((((&)))))))))))))))))))).	CUGCAGCAUCAUCAGGAUUCU&AGAAUCUUGAUGAUGCUGCAU	5	481.417	1	0.00123336	Output/DS_TL/cleaveLand_result/t_plot/nta-miR172c_XM_016619769.1_1782_TPlot.pdf
XM_016612548.1:1507	nta-miR159	XM_016612548.1	107790595	LOC107790595	PREDICTED: transcription factor GAMYB-like [Nicotiana sylvestris]	GO:0003677(DNA binding);GO:0003700(transcription factor activity, sequence-specific DNA binding);GO:0005634(nucleus);GO:0006355(regulation of transcription, DNA-templated);GO:0006355(regulation of transcription, DNA-templated)	04626(Plant-pathogen interaction);04626(Plant-pathogen interaction)	1516	1507	0.90411	3.5	.(((((((((((((.((((((&)))))).))))))))))))).	AGGAGCUCCCUUCACUCCAAA&UUUGGAUUGAAGGGAGCUCUA	7	673.984	0	0.0014469	Output/DS_TL/cleaveLand_result/t_plot/nta-miR159_XM_016612548.1_1507_TPlot.pdf
XM_016612745.1:527	nta-miR168d	XM_016612745.1	MSTRG.19192	LOC107790785	PREDICTED: protein argonaute 1-like isoform X2 [Nicotiana tabacum]	GO:0005515(protein binding);GO:0005515(protein binding)	NA	536	527	0.800915	6	..(((((.(((((((((((..&..))))))))))).)))))..	UACCCGAGCUGCACCAAGCAA&UCGCUUGGUGCAGGUCGGGAA	52	5006.74	0	0.0014469	Output/DS_TL/cleaveLand_result/t_plot/nta-miR168d_XM_016612745.1_527_TPlot.pdf
XM_016618038.1:2283	nta-miR169a_1ss7AG	XM_016618038.1	MSTRG.20705	LOC107795403	PREDICTED: nuclear transcription factor Y subunit A-3-like [Nicotiana tabacum]	GO:0003677(DNA binding);GO:0003700(transcription factor activity, sequence-specific DNA binding);GO:0005634(nucleus);GO:0006351(transcription, DNA-templated);GO:0006355(regulation of transcription, DNA-templated);GO:0016602(CCAAT-binding factor complex);GO:0016602(CCAAT-binding factor complex)	00970(Aminoacyl-tRNA biosynthesis);00970(Aminoacyl-tRNA biosynthesis)	2292	2283	0.763098	3.5	(((((((.((((((((((((.&.)))))))))))).)))))))	UCGGCAGUUCAUCCUUGGCUA&CAGCCAGGGAUGACUUGCCGA	9	866.551	0	0.0014469	Output/DS_TL/cleaveLand_result/t_plot/nta-miR169a_1ss7AG_XM_016618038.1_2283_TPlot.pdf
XM_016640134.1:1908	nta-miR160d	XM_016640134.1	107814687	LOC107814687	PREDICTED: auxin response factor 18-like isoform X1 [Nicotiana tabacum]	GO:0003677(DNA binding);GO:0003700(transcription factor activity, sequence-specific DNA binding);GO:0005634(nucleus);GO:0006351(transcription, DNA-templated);GO:0006355(regulation of transcription, DNA-templated);GO:0007389(pattern specification process);GO:0009734(auxin-activated signaling pathway);GO:0009738(abscisic acid-activated signaling pathway);GO:0009743(response to carbohydrate);GO:0010…	04075(Plant hormone signal transduction);04075(Plant hormone signal transduction)	1917	1908	1	0	(((((((((((((((((((((&)))))))))))))))))))))	UGGCAUGCAGGGAGCCAGGCA&UGCCUGGCUCCCUGCAUGCCA	46	4429.04	0	0.0014469	Output/DS_TL/cleaveLand_result/t_plot/nta-miR160d_XM_016640134.1_1908_TPlot.pdf
XM_016644581.1:162	nta-miR6019a	XM_016644581.1	MSTRG.4361	LOC107818550	PREDICTED: TMV resistance protein N-like [Nicotiana sylvestris]	GO:0005515(protein binding);GO:0005515(protein binding)	03040(Spliceosome);04141(Protein processing in endoplasmic reticulum);04144(Endocytosis);04144(Endocytosis)	171	162	1	1	((((((((((((((((((((((&))))))))))))))))))))))	AAACAUUUACGAGUCACCUGUA&UACAGGUGACUUGUAAAUGUUU	92	8858.08	0	0.0014469	Output/DS_TL/cleaveLand_result/t_plot/nta-miR6019a_XM_016644581.1_162_TPlot.pdf
XM_016657470.1:1526	nta-miR166a	XM_016657470.1	107829997	LOC107829997	PREDICTED: homeobox-leucine zipper protein ATHB-15-like [Nicotiana sylvestris]	GO:0003677(DNA binding);GO:0003700(transcription factor activity, sequence-specific DNA binding);GO:0005634(nucleus);GO:0006351(transcription, DNA-templated);GO:0006355(regulation of transcription, DNA-templated);GO:0008289(lipid binding);GO:0009855(determination of bilateral symmetry);GO:0009887(organ morphogenesis);GO:0009965(leaf morphogenesis);GO:0010014(meristem initiation);GO:0010073(merist…	NA	1535	1526	0.85941	3	..((((((((((((((((((.&.))))))))))))))))))..	CUGGAAUGAAGCCUGGUCCGG&UCGGACCAGGCUUCAUUCCCC	43	4140.19	0	0.0014469	Output/DS_TL/cleaveLand_result/t_plot/nta-miR166a_XM_016657470.1_1526_TPlot.pdf
XR_001643051.1:1234	nta-miR171b	XR_001643051.1	107763537	LOC107763537	PREDICTED: scarecrow-like protein 6 isoform X1 [Nicotiana tabacum]	GO:0003700(transcription factor activity, sequence-specific DNA binding);GO:0005634(nucleus);GO:0006355(regulation of transcription, DNA-templated);GO:0030154(cell differentiation);GO:0043565(sequence-specific DNA binding);GO:0043565(sequence-specific DNA binding)	04075(Plant hormone signal transduction);04075(Plant hormone signal transduction)	1243	1234	0.918782	2	..(((((((((((((((((((&)))))))))))))))))))..	AAUGAUAUUGGCGCGGCUCAA&UUGAGCCGCGCCAAUAUCACU	10	962.835	0	0.0014469	Output/DS_TL/cleaveLand_result/t_plot/nta-miR171b_XR_001643051.1_1234_TPlot.pdf
MSTRG.24455.2:1436	nta-miR171c	MSTRG.24455.2	MSTRG.24455	LOC107807449	PREDICTED: scarecrow-like protein 22 [Nicotiana tabacum]	GO:0003700(transcription factor activity, sequence-specific DNA binding);GO:0005634(nucleus);GO:0006355(regulation of transcription, DNA-templated);GO:0030154(cell differentiation);GO:0043565(sequence-specific DNA binding)	04075(Plant hormone signal transduction)	1445	1436	1	1	(((((((((((((((((((((&)))))))))))))))))))))	GAUAUUGGCGCGGCUCAAUCA&UGAUUGAGCCGUGCCAAUAUC	16	1540.54	0	0.00173603	Output/DS_TL/cleaveLand_result/t_plot/nta-miR171c_MSTRG.24455.2_1436_TPlot.pdf
XM_016578618.1:1448	nta-miR166a	XM_016578618.1	107760551	LOC107760551	PREDICTED: homeobox-leucine zipper protein ATHB-15-like isoform X1 [Nicotiana tabacum]	GO:0003677(DNA binding);GO:0003700(transcription factor activity, sequence-specific DNA binding);GO:0005634(nucleus);GO:0006351(transcription, DNA-templated);GO:0006355(regulation of transcription, DNA-templated);GO:0008289(lipid binding);GO:0009855(determination of bilateral symmetry);GO:0009887(organ morphogenesis);GO:0009965(leaf morphogenesis);GO:0010014(meristem initiation);GO:0010073(merist…	NA	1457	1448	0.85941	3	..((((((((((((((((((.&.))))))))))))))))))..	CUGGAAUGAAGCCUGGUCCGG&UCGGACCAGGCUUCAUUCCCC	47	4525.32	0	0.00173603	Output/DS_TL/cleaveLand_result/t_plot/nta-miR166a_XM_016578618.1_1448_TPlot.pdf
XM_016584484.1:1455	nta-miR160d	XM_016584484.1	107765789	LOC107765789	PREDICTED: auxin response factor 17 [Nicotiana sylvestris]	GO:0000987(core promoter proximal region sequence-specific DNA binding);GO:0003700(transcription factor activity, sequence-specific DNA binding);GO:0005634(nucleus);GO:0006351(transcription, DNA-templated);GO:0006355(regulation of transcription, DNA-templated);GO:0009555(pollen development);GO:0009653(anatomical structure morphogenesis);GO:0009734(auxin-activated signaling pathway);GO:0010208(pol…	04075(Plant hormone signal transduction);04075(Plant hormone signal transduction)	1464	1455	1	1	.((((((((((((((((((((&)))))))))))))))))))).	GGGCAUGCAGGGAGCCAGGCA&UGCCUGGCUCCCUGCAUGCCA	59	5680.72	0	0.00173603	Output/DS_TL/cleaveLand_result/t_plot/nta-miR160d_XM_016584484.1_1455_TPlot.pdf
XM_016624149.1:161	nta-miR6019a	XM_016624149.1	#N/A	#N/A	#N/A	#N/A	#N/A	170	161	1	1	((((((((((((((((((((((&))))))))))))))))))))))	AAACAUUUACGAGUCACCUGUA&UACAGGUGACUUGUAAAUGUUU	86	8280.38	0	0.00173603	Output/DS_TL/cleaveLand_result/t_plot/nta-miR6019a_XM_016624149.1_161_TPlot.pdf
XM_016630480.1:527	nta-miR168a	XM_016630480.1	MSTRG.24089	LOC107806342	PREDICTED: protein argonaute 1-like isoform X1 [Nicotiana tabacum]	GO:0005515(protein binding);GO:0005515(protein binding)	NA	536	527	0.786344	5	((.(((((.(((((((((((..&..))))))))))).)))))-))	GUACCCGAGCUGCACCAAGCAA&UCGCUUGGUGCAGGUCGGG-AC	48	4621.61	0	0.00173603	Output/DS_TL/cleaveLand_result/t_plot/nta-miR168a_XM_016630480.1_527_TPlot.pdf
XM_016640504.1:1752	nta-miR482b-3p	XM_016640504.1	107814998	LOC107814998	PREDICTED: disease susceptibility protein LOV1-like [Nicotiana sylvestris]	GO:0005524(ATP binding);GO:0005575(cellular_component);GO:0006952(defense response);GO:0043531(ADP binding)	04626(Plant-pathogen interaction)	1761	1752	0.910194	3	((((((((((((((.(((((((&))))))).))))))))))))))	GGGAUGGGUGGCAUCGGCAAGA&UCUUGCCAAUGCCAUCCAUUCC	33	3177.35	0	0.00173603	Output/DS_TL/cleaveLand_result/t_plot/nta-miR482b-3p_XM_016640504.1_1752_TPlot.pdf
XM_016649111.1:1686	nta-miR159	XM_016649111.1	107822559	LOC107822559	PREDICTED: transcription factor GAMYB-like [Nicotiana tabacum]	GO:0003677(DNA binding);GO:0003700(transcription factor activity, sequence-specific DNA binding);GO:0005634(nucleus);GO:0006355(regulation of transcription, DNA-templated)	04626(Plant-pathogen interaction)	1695	1686	0.90411	3	.(((((((((((((.((((((&)))))).))))))))))))).	AAGAGCUCCCUUCACUCCAAA&UUUGGAUUGAAGGGAGCUCUA	8	770.268	0	0.00173603	Output/DS_TL/cleaveLand_result/t_plot/nta-miR159_XM_016649111.1_1686_TPlot.pdf
XR_001645368.1:294	nta-miR6149a	XR_001645368.1	107773796	LOC107773796	PREDICTED: F-box/kelch-repeat protein At3g06240-like [Nicotiana tomentosiformis]	GO:0003674(molecular_function);GO:0005634(nucleus);GO:0008150(biological_process)	00970(Aminoacyl-tRNA biosynthesis)	303	294	0.820513	1.5	(((.(((((((((((((((((&))))))))))))))))).)))	GUCAAUUCAGGUGCGUAUCAA&UUGAUACGCACCUGAAUCGGC	8	770.268	0	0.00173603	Output/DS_TL/cleaveLand_result/t_plot/nta-miR6149a_XR_001645368.1_294_TPlot.pdf
XM_016582020.1:1395	nta-miR171b	XM_016582020.1	107763536	LOC107763536	PREDICTED: scarecrow-like protein 6 isoform X2 [Nicotiana tabacum]	GO:0003700(transcription factor activity, sequence-specific DNA binding);GO:0005634(nucleus);GO:0006355(regulation of transcription, DNA-templated);GO:0030154(cell differentiation);GO:0043565(sequence-specific DNA binding);GO:0043565(sequence-specific DNA binding)	04075(Plant hormone signal transduction);04075(Plant hormone signal transduction)	1404	1395	0.918782	2	..(((((((((((((((((((&)))))))))))))))))))..	AAUGAUAUUGGCGCGGCUCAA&UUGAGCCGCGCCAAUAUCACU	20	1925.67	0	0.00202508	Output/DS_TL/cleaveLand_result/t_plot/nta-miR171b_XM_016582020.1_1395_TPlot.pdf
XM_016588874.1:887	nta-miR396b	XM_016588874.1	107769640	LOC107769640	PREDICTED: growth-regulating factor 8-like [Nicotiana tabacum]	GO:0005524(ATP binding);GO:0005634(nucleus);GO:0006351(transcription, DNA-templated);GO:0006355(regulation of transcription, DNA-templated);GO:0009941(chloroplast envelope);GO:0048366(leaf development)	NA	897	887	0.874251	4	..(((((((((((.((((((((&))))))))-)))))))))))..	CCGUUCAAGAAAGCCUGUGGAA&UUCCACAG-CUUUCUUGAACUU	16	1540.54	0	0.00202508	Output/DS_TL/cleaveLand_result/t_plot/nta-miR396b_XM_016588874.1_887_TPlot.pdf
XM_016602462.1:1586	nta-miR160a	XM_016602462.1	107781721	LOC107781721	PREDICTED: auxin response factor 16-like [Nicotiana tomentosiformis]	GO:0003677(DNA binding);GO:0003700(transcription factor activity, sequence-specific DNA binding);GO:0005634(nucleus);GO:0006351(transcription, DNA-templated);GO:0006355(regulation of transcription, DNA-templated);GO:0007389(pattern specification process);GO:0009733(response to auxin);GO:0009734(auxin-activated signaling pathway);GO:0035198(miRNA binding);GO:0048829(root cap development);GO:005130…	04075(Plant hormone signal transduction)	1595	1586	1	1	.((((((((((((((((((((&)))))))))))))))))))).	AGGCAUACAGGGAGCCAGGCA&UGCCUGGCUCCCUGUAUGCCA	22	2118.24	0	0.00202508	Output/DS_TL/cleaveLand_result/t_plot/nta-miR160a_XM_016602462.1_1586_TPlot.pdf
XM_016603593.1:1462	nta-miR166a	XM_016603593.1	107782674	LOC107782674	PREDICTED: homeobox-leucine zipper protein ATHB-15-like isoform X1 [Nicotiana tomentosiformis]	GO:0003677(DNA binding);GO:0003700(transcription factor activity, sequence-specific DNA binding);GO:0005634(nucleus);GO:0006351(transcription, DNA-templated);GO:0006355(regulation of transcription, DNA-templated);GO:0008289(lipid binding);GO:0009855(determination of bilateral symmetry);GO:0009887(organ morphogenesis);GO:0009965(leaf morphogenesis);GO:0010014(meristem initiation);GO:0010073(merist…	NA	1471	1462	0.85941	3	..((((((((((((((((((.&.))))))))))))))))))..	CUGGAAUGAAGCCUGGUCCGG&UCGGACCAGGCUUCAUUCCCC	40	3851.34	0	0.00202508	Output/DS_TL/cleaveLand_result/t_plot/nta-miR166a_XM_016603593.1_1462_TPlot.pdf
XM_016612561.1:1475	nta-miR159	XM_016612561.1	107790595	LOC107790595	PREDICTED: transcription factor GAMYB-like [Nicotiana sylvestris]	GO:0003677(DNA binding);GO:0003700(transcription factor activity, sequence-specific DNA binding);GO:0005634(nucleus);GO:0006355(regulation of transcription, DNA-templated);GO:0006355(regulation of transcription, DNA-templated)	04626(Plant-pathogen interaction);04626(Plant-pathogen interaction)	1484	1475	0.90411	3.5	.(((((((((((((.((((((&)))))).))))))))))))).	AGGAGCUCCCUUCACUCCAAA&UUUGGAUUGAAGGGAGCUCUA	10	962.835	0	0.00202508	Output/DS_TL/cleaveLand_result/t_plot/nta-miR159_XM_016612561.1_1475_TPlot.pdf
XM_016618963.1:787	nta-miR6151g	XM_016618963.1	MSTRG.20934	LOC107796219	PREDICTED: uncharacterized protein LOC107796219 isoform X2 [Nicotiana tabacum]	GO:0003676(nucleic acid binding);GO:0005634(nucleus);GO:0008270(zinc ion binding);GO:0008270(zinc ion binding)	NA	796	787	0.759124	5.5	.((((((.((((((((((((((&)))))))))))))).)))))).	GCGAUCCUACGCUUCAUGCUCA&UGAGUGUGAGGCGUUGGAUUGA	12	1155.4	0	0.00202508	Output/DS_TL/cleaveLand_result/t_plot/nta-miR6151g_XM_016618963.1_787_TPlot.pdf
XM_016619768.1:1780	nta-miR172c	XM_016619768.1	MSTRG.21143	LOC107796949	PREDICTED: ethylene-responsive transcription factor RAP2-7-like isoform X1 [Nicotiana tabacum]	GO:0003677(DNA binding);GO:0003700(transcription factor activity, sequence-specific DNA binding);GO:0005634(nucleus);GO:0006351(transcription, DNA-templated);GO:0006355(regulation of transcription, DNA-templated);GO:0009908(flower development);GO:0010073(meristem maintenance);GO:0010093(specification of floral organ identity);GO:0019953(sexual reproduction);GO:0030154(cell differentiation);GO:004…	NA	1789	1780	0.997085	2	.((((((((((((((((((((&)))))))))))))))))))).	CUGCAGCAUCAUCAGGAUUCU&AGAAUCUUGAUGAUGCUGCAU	16	1540.54	0	0.00202508	Output/DS_TL/cleaveLand_result/t_plot/nta-miR172c_XM_016619768.1_1780_TPlot.pdf
XM_016640136.1:1853	nta-miR160d	XM_016640136.1	107814687	LOC107814687	PREDICTED: auxin response factor 18-like isoform X1 [Nicotiana tabacum]	GO:0003677(DNA binding);GO:0003700(transcription factor activity, sequence-specific DNA binding);GO:0005634(nucleus);GO:0006351(transcription, DNA-templated);GO:0006355(regulation of transcription, DNA-templated);GO:0007389(pattern specification process);GO:0009734(auxin-activated signaling pathway);GO:0009738(abscisic acid-activated signaling pathway);GO:0009743(response to carbohydrate);GO:0010…	04075(Plant hormone signal transduction);04075(Plant hormone signal transduction)	1862	1853	1	0	(((((((((((((((((((((&)))))))))))))))))))))	UGGCAUGCAGGGAGCCAGGCA&UGCCUGGCUCCCUGCAUGCCA	39	3755.05	0	0.00202508	Output/DS_TL/cleaveLand_result/t_plot/nta-miR160d_XM_016640136.1_1853_TPlot.pdf
XM_016644580.1:162	nta-miR6019a	XM_016644580.1	MSTRG.4361	LOC107818550	PREDICTED: TMV resistance protein N-like [Nicotiana sylvestris]	GO:0005515(protein binding);GO:0005515(protein binding)	03040(Spliceosome);04141(Protein processing in endoplasmic reticulum);04144(Endocytosis);04144(Endocytosis)	171	162	1	1	((((((((((((((((((((((&))))))))))))))))))))))	AAACAUUUACGAGUCACCUGUA&UACAGGUGACUUGUAAAUGUUU	77	7413.83	0	0.00202508	Output/DS_TL/cleaveLand_result/t_plot/nta-miR6019a_XM_016644580.1_162_TPlot.pdf
XM_016590746.1:576	nta-miR168d	XM_016590746.1	MSTRG.12855	LOC107771391	PREDICTED: protein argonaute 1-like [Nicotiana tabacum]	GO:0005515(protein binding)	NA	585	576	0.798627	6	..(((((.(((((((((((..&..))))))))))).)))))..	CACCCGAGCUGCACCAAGCUA&UCGCUUGGUGCAGGUCGGGAA	33	3177.35	0	0.00231404	Output/DS_TL/cleaveLand_result/t_plot/nta-miR168d_XM_016590746.1_576_TPlot.pdf
XM_016612569.1:1318	nta-miR159	XM_016612569.1	#N/A	#N/A	#N/A	#N/A	#N/A	1327	1318	0.90411	3.5	.(((((((((((((.((((((&)))))).))))))))))))).	AGGAGCUCCCUUCACUCCAAA&UUUGGAUUGAAGGGAGCUCUA	13	1251.68	0	0.00231404	Output/DS_TL/cleaveLand_result/t_plot/nta-miR159_XM_016612569.1_1318_TPlot.pdf
XM_016640135.1:1644	nta-miR160d	XM_016640135.1	#N/A	#N/A	#N/A	#N/A	#N/A	1653	1644	1	0	(((((((((((((((((((((&)))))))))))))))))))))	UGGCAUGCAGGGAGCCAGGCA&UGCCUGGCUCCCUGCAUGCCA	37	3562.49	0	0.00231404	Output/DS_TL/cleaveLand_result/t_plot/nta-miR160d_XM_016640135.1_1644_TPlot.pdf
XM_016642435.1:401	nta-miR396b	XM_016642435.1	107816694	LOC107816694	PREDICTED: growth-regulating factor 1-like [Nicotiana tomentosiformis]	GO:0005524(ATP binding);GO:0005634(nucleus);GO:0006351(transcription, DNA-templated);GO:0006355(regulation of transcription, DNA-templated);GO:0048366(leaf development)	NA	411	401	0.874251	4	..(((((((((((.((((((((&))))))))-)))))))))))..	CCGUUCAAGAAAGCCUGUGGAA&UUCCACAG-CUUUCUUGAACUU	5	481.417	0	0.00231404	Output/DS_TL/cleaveLand_result/t_plot/nta-miR396b_XM_016642435.1_401_TPlot.pdf
XM_016649481.1:1067	nta-miR166a	XM_016649481.1	MSTRG.5736	LOC107822894	PREDICTED: homeobox-leucine zipper protein REVOLUTA-like [Nicotiana tabacum]	GO:0003677(DNA binding);GO:0003700(transcription factor activity, sequence-specific DNA binding);GO:0005634(nucleus);GO:0006351(transcription, DNA-templated);GO:0006355(regulation of transcription, DNA-templated);GO:0008289(lipid binding);GO:0009855(determination of bilateral symmetry);GO:0009944(polarity specification of adaxial/abaxial axis);GO:0009956(radial pattern formation);GO:0010014(meris…	NA	1076	1067	0.848073	3.5	..((((((((((((((((((.&.))))))))))))))))))..	CUGGGAUGAAGCCUGGUCCGG&UCGGACCAGGCUUCAUUCCCC	75	7221.26	0	0.00231404	Output/DS_TL/cleaveLand_result/t_plot/nta-miR166a_XM_016649481.1_1067_TPlot.pdf
XM_016649820.1:907	nta-miR156g_L+1	XM_016649820.1	107823216	LOC107823216	PREDICTED: squamosa promoter-binding-like protein 9 [Nicotiana tabacum]	GO:0003677(DNA binding);GO:0003700(transcription factor activity, sequence-specific DNA binding);GO:0005634(nucleus);GO:0006351(transcription, DNA-templated);GO:0006355(regulation of transcription, DNA-templated);GO:0008361(regulation of cell size);GO:0010228(vegetative to reproductive phase transition of meristem);GO:0042127(regulation of cell proliferation);GO:0046872(metal ion binding);GO:0048…	NA	916	907	0.928375	2	(((((((((.(((((((((((&))))))))))).)))))))))	GUGCUCUCUCUCUUCUGUCAA&UUGACAGAAGAUAGAGAGCAC	25	2407.09	0	0.00231404	Output/DS_TL/cleaveLand_result/t_plot/nta-miR156g_L+1_XM_016649820.1_907_TPlot.pdf
XM_016649220.1:1498	nta-miR156g_L+1	XM_016649220.1	107822648	LOC107822648	PREDICTED: squamosa promoter-binding-like protein 12 isoform X3 [Nicotiana tabacum]	GO:0003677(DNA binding);GO:0003700(transcription factor activity, sequence-specific DNA binding);GO:0005634(nucleus);GO:0006351(transcription, DNA-templated);GO:0006355(regulation of transcription, DNA-templated);GO:0044212(transcription regulatory region DNA binding);GO:0046872(metal ion binding);GO:0048510(regulation of timing of transition from vegetative to reproductive phase);GO:0048653(anth…	01210(2-Oxocarboxylic acid metabolism);01230(Biosynthesis of amino acids);00220(Arginine biosynthesis);00220(Arginine biosynthesis)	1507	1498	0.931129	2	(((((((((.(((((((((((&))))))))))).)))))))))	GUGCUCUCUCUCUUCUGUCAA&UUGACAGAAGAUAGAGAGCAC	2	192.567	1	0.00246519	Output/DS_TL/cleaveLand_result/t_plot/nta-miR156g_L+1_XM_016649220.1_1498_TPlot.pdf
XM_016598140.1:100	nta-miR408	XM_016598140.1	MSTRG.15134	LOC107777966	PREDICTED: basic blue protein-like [Nicotiana tabacum]	GO:0046658(anchored component of plasma membrane)	NA	109	100	0.822616	3	((((((((((((.((((((((&)))))))).))))))))))))	GGUCAGGGAAGAAGCAGUGCA&UGCACUGCCUCUUCCCUGGCU	169	16271.9	0	0.00260291	Output/DS_TL/cleaveLand_result/t_plot/nta-miR408_XM_016598140.1_100_TPlot.pdf
XM_016620081.1:2188	nta-miR160d	XM_016620081.1	107797209	LOC107797209	PREDICTED: auxin response factor 18-like isoform X1 [Nicotiana tabacum]	GO:0003677(DNA binding);GO:0003700(transcription factor activity, sequence-specific DNA binding);GO:0005634(nucleus);GO:0006351(transcription, DNA-templated);GO:0006355(regulation of transcription, DNA-templated);GO:0007389(pattern specification process);GO:0009733(response to auxin);GO:0009734(auxin-activated signaling pathway);GO:0035198(miRNA binding);GO:0048829(root cap development);GO:005130…	04075(Plant hormone signal transduction);04075(Plant hormone signal transduction)	2197	2188	1	0	(((((((((((((((((((((&)))))))))))))))))))))	UGGCAUGCAGGGAGCCAGGCA&UGCCUGGCUCCCUGCAUGCCA	15	1444.25	0	0.00260291	Output/DS_TL/cleaveLand_result/t_plot/nta-miR160d_XM_016620081.1_2188_TPlot.pdf
XM_016643476.1:653	nta-miR156g_L+1	XM_016643476.1	107817617	LOC107817617	PREDICTED: squamosa promoter-binding-like protein 9 [Nicotiana tabacum]	NA	NA	662	653	0.928375	2	(((((((((.(((((((((((&))))))))))).)))))))))	GUGCUCUCUCUCUUCUGUCAA&UUGACAGAAGAUAGAGAGCAC	41	3947.62	0	0.00260291	Output/DS_TL/cleaveLand_result/t_plot/nta-miR156g_L+1_XM_016643476.1_653_TPlot.pdf
XM_016649482.1:738	nta-miR166a	XM_016649482.1	MSTRG.5736	LOC107822894	PREDICTED: homeobox-leucine zipper protein REVOLUTA-like [Nicotiana tabacum]	GO:0003677(DNA binding);GO:0003700(transcription factor activity, sequence-specific DNA binding);GO:0005634(nucleus);GO:0006351(transcription, DNA-templated);GO:0006355(regulation of transcription, DNA-templated);GO:0008289(lipid binding);GO:0009855(determination of bilateral symmetry);GO:0009944(polarity specification of adaxial/abaxial axis);GO:0009956(radial pattern formation);GO:0010014(meris…	NA	747	738	0.848073	3.5	..((((((((((((((((((.&.))))))))))))))))))..	CUGGGAUGAAGCCUGGUCCGG&UCGGACCAGGCUUCAUUCCCC	74	7124.98	0	0.00260291	Output/DS_TL/cleaveLand_result/t_plot/nta-miR166a_XM_016649482.1_738_TPlot.pdf
XM_016649915.1:821	nta-miR396b	XM_016649915.1	107823287	LOC107823287	PREDICTED: growth-regulating factor 8-like [Nicotiana tabacum]	GO:0005524(ATP binding);GO:0005634(nucleus);GO:0006351(transcription, DNA-templated);GO:0006355(regulation of transcription, DNA-templated);GO:0009941(chloroplast envelope);GO:0048366(leaf development)	NA	831	821	0.874251	4	..(((((((((((.((((((((&))))))))-)))))))))))..	CCGUUCAAGAAAGCCUGUGGAA&UUCCACAG-CUUUCUUGAACUU	22	2118.24	0	0.00260291	Output/DS_TL/cleaveLand_result/t_plot/nta-miR396b_XM_016649915.1_821_TPlot.pdf
XM_016655249.1:1508	nta-miR160a	XM_016655249.1	107828000	LOC107828000	PREDICTED: auxin response factor 18-like [Nicotiana tabacum]	GO:0003677(DNA binding);GO:0003700(transcription factor activity, sequence-specific DNA binding);GO:0005634(nucleus);GO:0006351(transcription, DNA-templated);GO:0006355(regulation of transcription, DNA-templated);GO:0007389(pattern specification process);GO:0009734(auxin-activated signaling pathway);GO:0009738(abscisic acid-activated signaling pathway);GO:0009743(response to carbohydrate);GO:0010…	04075(Plant hormone signal transduction);04075(Plant hormone signal transduction)	1517	1508	1	1	.((((((((((((((((((((&)))))))))))))))))))).	AGGCAUACAGGGAGCCAGGCA&UGCCUGGCUCCCUGUAUGCCA	40	3851.34	0	0.00260291	Output/DS_TL/cleaveLand_result/t_plot/nta-miR160a_XM_016655249.1_1508_TPlot.pdf
XM_016611294.1:649	nta-miR168a	XM_016611294.1	#N/A	#N/A	#N/A	#N/A	#N/A	658	649	0.768722	6	..(((((.(((((((((((..&..))))))))))).)))))..	CACCCGAGCUGCACCAAGCUA&UCGCUUGGUGCAGGUCGGGAC	23	2214.52	1	0.00287547	Output/DS_TL/cleaveLand_result/t_plot/nta-miR168a_XM_016611294.1_649_TPlot.pdf
XM_016589545.1:100	nta-miR408	XM_016589545.1	MSTRG.12500	LOC107770257	PREDICTED: basic blue protein-like [Nicotiana sylvestris]	GO:0046658(anchored component of plasma membrane)	NA	109	100	0.822616	3	((((((((((((.((((((((&)))))))).))))))))))))	GGUCAGGGAAGAAGCAGUGCA&UGCACUGCCUCUUCCCUGGCU	25	2407.09	0	0.00289171	Output/DS_TL/cleaveLand_result/t_plot/nta-miR408_XM_016589545.1_100_TPlot.pdf
XM_016599233.1:1758	nta-miR172c	XM_016599233.1	MSTRG.15422	LOC107778909	PREDICTED: ethylene-responsive transcription factor RAP2-7-like isoform X1 [Nicotiana tabacum]	GO:0010227(floral organ abscission);GO:0048316(seed development);GO:0048461(flower structural organization);GO:0080187(floral organ senescence);GO:0080187(floral organ senescence)	NA	1767	1758	0.997085	2	.((((((((((((((((((((&)))))))))))))))))))).	CUGCAGCAUCAUCAGGAUUCU&AGAAUCUUGAUGAUGCUGCAU	6	577.701	0	0.00289171	Output/DS_TL/cleaveLand_result/t_plot/nta-miR172c_XM_016599233.1_1758_TPlot.pdf
XM_016629135.1:1728	nta-miR159	XM_016629135.1	107805141	LOC107805141	PREDICTED: transcription factor GAMYB-like isoform X1 [Nicotiana tabacum]	GO:0003677(DNA binding);GO:0003700(transcription factor activity, sequence-specific DNA binding);GO:0005634(nucleus);GO:0006355(regulation of transcription, DNA-templated);GO:0009723(response to ethylene);GO:0009740(gibberellic acid mediated signaling pathway);GO:0009751(response to salicylic acid);GO:0043068(positive regulation of programmed cell death);GO:0045893(positive regulation of transcri…	04626(Plant-pathogen interaction);04626(Plant-pathogen interaction)	1737	1728	0.871233	4	..((((((((((((.((((((&)))))).))))))))))))..	UCGAGCUCCCUUCACUCCAAA&UUUGGAUUGAAGGGAGCUCUA	24	2310.8	0	0.00289171	Output/DS_TL/cleaveLand_result/t_plot/nta-miR159_XM_016629135.1_1728_TPlot.pdf
XM_016641933.1:2161	nta-miR160d	XM_016641933.1	107816234	LOC107816234	PREDICTED: auxin response factor 18-like isoform X1 [Nicotiana tabacum]	GO:0003677(DNA binding);GO:0003700(transcription factor activity, sequence-specific DNA binding);GO:0005634(nucleus);GO:0006351(transcription, DNA-templated);GO:0006355(regulation of transcription, DNA-templated);GO:0007389(pattern specification process);GO:0009733(response to auxin);GO:0009734(auxin-activated signaling pathway);GO:0035198(miRNA binding);GO:0048829(root cap development);GO:005130…	04075(Plant hormone signal transduction);04075(Plant hormone signal transduction)	2170	2161	1	0	(((((((((((((((((((((&)))))))))))))))))))))	UGGCAUGCAGGGAGCCAGGCA&UGCCUGGCUCCCUGCAUGCCA	27	2599.65	0	0.00289171	Output/DS_TL/cleaveLand_result/t_plot/nta-miR160d_XM_016641933.1_2161_TPlot.pdf
XM_016642884.1:1185	nta-miR156g_L+1	XM_016642884.1	107817110	LOC107817110	PREDICTED: squamosa promoter-binding-like protein 9 [Nicotiana tabacum]	NA	NA	1194	1185	0.928375	2	(((((((((.(((((((((((&))))))))))).)))))))))	GUGCUCUCUCUCUUCUGUCAA&UUGACAGAAGAUAGAGAGCAC	28	2695.94	0	0.00289171	Output/DS_TL/cleaveLand_result/t_plot/nta-miR156g_L+1_XM_016642884.1_1185_TPlot.pdf
XR_001643053.1:1234	nta-miR171b	XR_001643053.1	107763537	LOC107763537	PREDICTED: scarecrow-like protein 6 isoform X1 [Nicotiana tabacum]	GO:0003700(transcription factor activity, sequence-specific DNA binding);GO:0005634(nucleus);GO:0006355(regulation of transcription, DNA-templated);GO:0030154(cell differentiation);GO:0043565(sequence-specific DNA binding);GO:0043565(sequence-specific DNA binding)	04075(Plant hormone signal transduction);04075(Plant hormone signal transduction)	1243	1234	0.918782	2	..(((((((((((((((((((&)))))))))))))))))))..	AAUGAUAUUGGCGCGGCUCAA&UUGAGCCGCGCCAAUAUCACU	8	770.268	0	0.00289171	Output/DS_TL/cleaveLand_result/t_plot/nta-miR171b_XR_001643053.1_1234_TPlot.pdf
MSTRG.14136.2:3311	nta-miR167d	MSTRG.14136.2	MSTRG.14136	LOC107774783	PREDICTED: auxin response factor 6-like isoform X3 [Nicotiana tomentosiformis]	GO:0003677(DNA binding);GO:0003700(transcription factor activity, sequence-specific DNA binding);GO:0005515(protein binding);GO:0005634(nucleus);GO:0006351(transcription, DNA-templated);GO:0006355(regulation of transcription, DNA-templated);GO:0009733(response to auxin);GO:0009734(auxin-activated signaling pathway);GO:0009908(flower development)	04075(Plant hormone signal transduction)	3320	3311	0.796915	5	.((((((.(((((((((((..&..))))))))))).)))))).	GAGAUCAGGCUGGCAGCUUGU&UGAAGCUGCCAGCAUGAUCUA	36	3466.2	0	0.00318042	Output/DS_TL/cleaveLand_result/t_plot/nta-miR167d_MSTRG.14136.2_3311_TPlot.pdf
XM_016582023.1:1234	nta-miR171b	XM_016582023.1	107763537	LOC107763537	PREDICTED: scarecrow-like protein 6 isoform X1 [Nicotiana tabacum]	GO:0003700(transcription factor activity, sequence-specific DNA binding);GO:0005634(nucleus);GO:0006355(regulation of transcription, DNA-templated);GO:0030154(cell differentiation);GO:0043565(sequence-specific DNA binding);GO:0043565(sequence-specific DNA binding)	04075(Plant hormone signal transduction);04075(Plant hormone signal transduction)	1243	1234	0.918782	2	..(((((((((((((((((((&)))))))))))))))))))..	AAUGAUAUUGGCGCGGCUCAA&UUGAGCCGCGCCAAUAUCACU	5	481.417	0	0.00318042	Output/DS_TL/cleaveLand_result/t_plot/nta-miR171b_XM_016582023.1_1234_TPlot.pdf
XM_016586695.1:14	nta-miR160d	XM_016586695.1	107767633	LOC107767633	PREDICTED: auxin response factor 18-like isoform X1 [Nicotiana tomentosiformis]	GO:0003677(DNA binding);GO:0003700(transcription factor activity, sequence-specific DNA binding);GO:0005634(nucleus);GO:0006351(transcription, DNA-templated);GO:0006355(regulation of transcription, DNA-templated);GO:0007389(pattern specification process);GO:0009733(response to auxin);GO:0009734(auxin-activated signaling pathway);GO:0035198(miRNA binding);GO:0048829(root cap development);GO:005130…	04075(Plant hormone signal transduction)	23	14	1	0	(((((((((((((((((((((&)))))))))))))))))))))	UGGCAUGCAGGGAGCCAGGCA&UGCCUGGCUCCCUGCAUGCCA	66	6354.71	0	0.00318042	Output/DS_TL/cleaveLand_result/t_plot/nta-miR160d_XM_016586695.1_14_TPlot.pdf
XM_016629136.1:1696	nta-miR159	XM_016629136.1	107805141	LOC107805141	PREDICTED: transcription factor GAMYB-like isoform X1 [Nicotiana tabacum]	GO:0003677(DNA binding);GO:0003700(transcription factor activity, sequence-specific DNA binding);GO:0005634(nucleus);GO:0006355(regulation of transcription, DNA-templated);GO:0009723(response to ethylene);GO:0009740(gibberellic acid mediated signaling pathway);GO:0009751(response to salicylic acid);GO:0043068(positive regulation of programmed cell death);GO:0045893(positive regulation of transcri…	04626(Plant-pathogen interaction);04626(Plant-pathogen interaction)	1705	1696	0.871233	4	..((((((((((((.((((((&)))))).))))))))))))..	UCGAGCUCCCUUCACUCCAAA&UUUGGAUUGAAGGGAGCUCUA	21	2021.95	0	0.00318042	Output/DS_TL/cleaveLand_result/t_plot/nta-miR159_XM_016629136.1_1696_TPlot.pdf
XM_016582022.1:1314	nta-miR171c	XM_016582022.1	107763536	LOC107763536	PREDICTED: scarecrow-like protein 6 isoform X2 [Nicotiana tabacum]	GO:0003700(transcription factor activity, sequence-specific DNA binding);GO:0005634(nucleus);GO:0006355(regulation of transcription, DNA-templated);GO:0030154(cell differentiation);GO:0043565(sequence-specific DNA binding);GO:0043565(sequence-specific DNA binding)	04075(Plant hormone signal transduction);04075(Plant hormone signal transduction)	1323	1314	1	1	(((((((((((((((((((((&)))))))))))))))))))))	GAUAUUGGCGCGGCUCAAUCA&UGAUUGAGCCGUGCCAAUAUC	10	962.835	1	0.00328557	Output/DS_TL/cleaveLand_result/t_plot/nta-miR171c_XM_016582022.1_1314_TPlot.pdf
XM_016612340.1:154	nta-miR6149a	XM_016612340.1	107790412	LOC107790412	PREDICTED: F-box/kelch-repeat protein At3g06240-like [Nicotiana tabacum]	GO:0004842(ubiquitin-protein transferase activity);GO:0019005(SCF ubiquitin ligase complex);GO:0031146(SCF-dependent proteasomal ubiquitin-dependent protein catabolic process)	00970(Aminoacyl-tRNA biosynthesis)	163	154	0.774359	2	(((.((.((((((((((((((&)))))))))))))).)).)))	GCCAAUCCAGGUGCGUAUCAA&UUGAUACGCACCUGAAUCGGC	12	1155.4	1	0.00328557	Output/DS_TL/cleaveLand_result/t_plot/nta-miR6149a_XM_016612340.1_154_TPlot.pdf
XR_001643054.1:1234	nta-miR171b	XR_001643054.1	#N/A	#N/A	#N/A	#N/A	#N/A	1243	1234	0.918782	2	..(((((((((((((((((((&)))))))))))))))))))..	AAUGAUAUUGGCGCGGCUCAA&UUGAGCCGCGCCAAUAUCACU	5	481.417	1	0.00328557	Output/DS_TL/cleaveLand_result/t_plot/nta-miR171b_XR_001643054.1_1234_TPlot.pdf
XM_016578298.1:74	nta-miR396b	XM_016578298.1	107760271	LOC107760271	PREDICTED: growth-regulating factor 1-like [Nicotiana sylvestris]	GO:0005515(protein binding);GO:0005524(ATP binding);GO:0005634(nucleus);GO:0006351(transcription, DNA-templated);GO:0006355(regulation of transcription, DNA-templated);GO:0009624(response to nematode);GO:0048364(root development);GO:0048366(leaf development);GO:0061062(regulation of nematode larval development)	NA	84	74	0.874251	4	..(((((((((((.((((((((&))))))))-)))))))))))..	UCGUUCAAGAAAGCCUGUGGAA&UUCCACAG-CUUUCUUGAACUU	124	11939.1	0	0.00346905	Output/DS_TL/cleaveLand_result/t_plot/nta-miR396b_XM_016578298.1_74_TPlot.pdf
XM_016580372.1:2580	nta-miR167d	XM_016580372.1	MSTRG.9972	LOC107762058	PREDICTED: auxin response factor 6-like isoform X2 [Nicotiana tabacum]	GO:0003677(DNA binding);GO:0003700(transcription factor activity, sequence-specific DNA binding);GO:0005515(protein binding);GO:0005634(nucleus);GO:0006351(transcription, DNA-templated);GO:0006355(regulation of transcription, DNA-templated);GO:0009733(response to auxin);GO:0009734(auxin-activated signaling pathway);GO:0009908(flower development);GO:0009908(flower development)	04075(Plant hormone signal transduction);04075(Plant hormone signal transduction)	2589	2580	0.796915	5	.((((((.(((((((((((..&..))))))))))).)))))).	GAGAUCAGGCUGGCAGCUUGU&UGAAGCUGCCAGCAUGAUCUA	8	770.268	0	0.00346905	Output/DS_TL/cleaveLand_result/t_plot/nta-miR167d_XM_016580372.1_2580_TPlot.pdf
XM_016616723.1:1692	nta-miR166a	XM_016616723.1	MSTRG.20326	LOC107794244	PREDICTED: homeobox-leucine zipper protein REVOLUTA-like [Nicotiana tabacum]	GO:0003677(DNA binding);GO:0003700(transcription factor activity, sequence-specific DNA binding);GO:0005634(nucleus);GO:0006351(transcription, DNA-templated);GO:0006355(regulation of transcription, DNA-templated);GO:0008289(lipid binding);GO:0009855(determination of bilateral symmetry);GO:0009944(polarity specification of adaxial/abaxial axis);GO:0009956(radial pattern formation);GO:0010014(meris…	NA	1701	1692	0.848073	3.5	..((((((((((((((((((.&.))))))))))))))))))..	CUGGGAUGAAGCCUGGUCCGG&UCGGACCAGGCUUCAUUCCCC	73	7028.69	0	0.00346905	Output/DS_TL/cleaveLand_result/t_plot/nta-miR166a_XM_016616723.1_1692_TPlot.pdf
XM_016620080.1:2185	nta-miR160d	XM_016620080.1	107797209	LOC107797209	PREDICTED: auxin response factor 18-like isoform X1 [Nicotiana tabacum]	GO:0003677(DNA binding);GO:0003700(transcription factor activity, sequence-specific DNA binding);GO:0005634(nucleus);GO:0006351(transcription, DNA-templated);GO:0006355(regulation of transcription, DNA-templated);GO:0007389(pattern specification process);GO:0009733(response to auxin);GO:0009734(auxin-activated signaling pathway);GO:0035198(miRNA binding);GO:0048829(root cap development);GO:005130…	04075(Plant hormone signal transduction);04075(Plant hormone signal transduction)	2194	2185	1	0	(((((((((((((((((((((&)))))))))))))))))))))	UGGCAUGCAGGGAGCCAGGCA&UGCCUGGCUCCCUGCAUGCCA	20	1925.67	0	0.00346905	Output/DS_TL/cleaveLand_result/t_plot/nta-miR160d_XM_016620080.1_2185_TPlot.pdf
XM_016629134.1:1728	nta-miR159	XM_016629134.1	#N/A	#N/A	#N/A	#N/A	#N/A	1737	1728	0.871233	4	..((((((((((((.((((((&)))))).))))))))))))..	UCGAGCUCCCUUCACUCCAAA&UUUGGAUUGAAGGGAGCUCUA	22	2118.24	0	0.00346905	Output/DS_TL/cleaveLand_result/t_plot/nta-miR159_XM_016629134.1_1728_TPlot.pdf
XM_016644157.1:1444	nta-miR172a_R-1	XM_016644157.1	107818199	LOC107818199	PREDICTED: floral homeotic protein APETALA 2-like isoform X1 [Nicotiana tabacum]	GO:0010227(floral organ abscission);GO:0048316(seed development);GO:0048461(flower structural organization);GO:0080187(floral organ senescence);GO:0080187(floral organ senescence)	04075(Plant hormone signal transduction);04075(Plant hormone signal transduction)	1453	1444	1	2	(((((((((((((((((((.&.)))))))))))))))))))	UGCAGCAUCAUCAGGAUUCG&AGAAUCUUGAUGAUGCUGCA	9	866.551	0	0.00346905	Output/DS_TL/cleaveLand_result/t_plot/nta-miR172a_R-1_XM_016644157.1_1444_TPlot.pdf
XR_001653016.1:634	nta-miR390a	XR_001653016.1	MSTRG.24574	LOC107807831	0	NA	NA	643	634	0.78972	4	..((.((((((((((((((((.&.))))))))))))))))-))..	CUUGUCUAUCCCUCCUGAGCUA&AAGCUCAGGAGGGAUAG-CACC	17	1636.82	0	0.00346905	Output/DS_TL/cleaveLand_result/t_plot/nta-miR390a_XR_001653016.1_634_TPlot.pdf
XR_001643052.1:1234	nta-miR171b	XR_001643052.1	107763537	LOC107763537	PREDICTED: scarecrow-like protein 6 isoform X1 [Nicotiana tabacum]	GO:0003700(transcription factor activity, sequence-specific DNA binding);GO:0005634(nucleus);GO:0006355(regulation of transcription, DNA-templated);GO:0030154(cell differentiation);GO:0043565(sequence-specific DNA binding);GO:0043565(sequence-specific DNA binding)	04075(Plant hormone signal transduction);04075(Plant hormone signal transduction)	1243	1234	0.918782	2	..(((((((((((((((((((&)))))))))))))))))))..	AAUGAUAUUGGCGCGGCUCAA&UUGAGCCGCGCCAAUAUCACU	6	577.701	1	0.00369551	Output/DS_TL/cleaveLand_result/t_plot/nta-miR171b_XR_001643052.1_1234_TPlot.pdf
MSTRG.22803.1:1744	nta-miR171b	MSTRG.22803.1	MSTRG.22803	LOC107802311	0	NA	NA	1753	1744	0.908629	1	((.((((((((((((((((((&)))))))))))))))))).))	AGGGAUAUUGGCGCGGCUCAA&UUGAGCCGCGCCAAUAUCACU	13	1251.68	0	0.00375759	Output/DS_TL/cleaveLand_result/t_plot/nta-miR171b_MSTRG.22803.1_1744_TPlot.pdf
XM_016638344.1:855	nta-miR396b	XM_016638344.1	MSTRG.26163	LOC107813130	PREDICTED: growth-regulating factor 3-like [Nicotiana tabacum]	GO:0005524(ATP binding);GO:0005634(nucleus);GO:0006351(transcription, DNA-templated);GO:0006355(regulation of transcription, DNA-templated);GO:0008285(negative regulation of cell proliferation);GO:0009624(response to nematode);GO:0044212(transcription regulatory region DNA binding);GO:0048364(root development);GO:0048366(leaf development);GO:0061062(regulation of nematode larval development)	NA	865	855	0.874251	4	..(((((((((((.((((((((&))))))))-)))))))))))..	CCGUUCAAGAAAGCCUGUGGAA&UUCCACAG-CUUUCUUGAACUU	134	12902	0	0.00375759	Output/DS_TL/cleaveLand_result/t_plot/nta-miR396b_XM_016638344.1_855_TPlot.pdf
XM_016642363.1:121	nta-miR159	XM_016642363.1	107816633	LOC107816633	PREDICTED: transcription factor GAMYB-like [Nicotiana tomentosiformis]	GO:0003677(DNA binding);GO:0003700(transcription factor activity, sequence-specific DNA binding);GO:0005634(nucleus);GO:0006355(regulation of transcription, DNA-templated);GO:0048235(pollen sperm cell differentiation)	04626(Plant-pathogen interaction)	130	121	0.841096	3.5	(((((((((.(((((((((((&))))))))))).)))))))))	UGGAGCUCCAUUCGAUCCAAA&UUUGGAUUGAAGGGAGCUCUA	5	481.417	0	0.00375759	Output/DS_TL/cleaveLand_result/t_plot/nta-miR159_XM_016642363.1_121_TPlot.pdf
XM_016655248.1:1929	nta-miR160a	XM_016655248.1	107828000	LOC107828000	PREDICTED: auxin response factor 18-like [Nicotiana tabacum]	GO:0003677(DNA binding);GO:0003700(transcription factor activity, sequence-specific DNA binding);GO:0005634(nucleus);GO:0006351(transcription, DNA-templated);GO:0006355(regulation of transcription, DNA-templated);GO:0007389(pattern specification process);GO:0009734(auxin-activated signaling pathway);GO:0009738(abscisic acid-activated signaling pathway);GO:0009743(response to carbohydrate);GO:0010…	04075(Plant hormone signal transduction);04075(Plant hormone signal transduction)	1938	1929	1	1	.((((((((((((((((((((&)))))))))))))))))))).	AGGCAUACAGGGAGCCAGGCA&UGCCUGGCUCCCUGUAUGCCA	25	2407.09	0	0.00375759	Output/DS_TL/cleaveLand_result/t_plot/nta-miR160a_XM_016655248.1_1929_TPlot.pdf
XR_001645035.1:571	nta-miR390a	XR_001645035.1	107772280	LOC107772280	0	NA	NA	580	571	0.78972	4	..((.((((((((((((((((.&.))))))))))))))))-))..	CUUGUCUAUCCCUCCUGAGCUA&AAGCUCAGGAGGGAUAG-CACC	209	20123.2	0	0.00375759	Output/DS_TL/cleaveLand_result/t_plot/nta-miR390a_XR_001645035.1_571_TPlot.pdf
XM_016579418.1:257	nta-miR6020b	XM_016579418.1	MSTRG.9672	LOC107761220	PREDICTED: TMV resistance protein N-like [Nicotiana tabacum]	GO:0005515(protein binding)	03040(Spliceosome);04141(Protein processing in endoplasmic reticulum);04144(Endocytosis)	266	257	0.849673	1	(((((((.(((((((((((((&))))))))))))).)))))))	GAAGAUAAUCGAAGAACAUUU&AAAUGUUCUUCGAGUAUCUUC	50	4814.17	0	0.00404605	Output/DS_TL/cleaveLand_result/t_plot/nta-miR6020b_XM_016579418.1_257_TPlot.pdf
XM_016584328.1:925	nta-miR164a	XM_016584328.1	107765662	LOC107765662	PREDICTED: NAC domain-containing protein 100 isoform X1 [Nicotiana sylvestris]	GO:0003677(DNA binding);GO:0003700(transcription factor activity, sequence-specific DNA binding);GO:0005634(nucleus);GO:0006351(transcription, DNA-templated);GO:0006355(regulation of transcription, DNA-templated);GO:0007275(multicellular organism development);GO:0007275(multicellular organism development)	03018(RNA degradation);03018(RNA degradation)	934	925	0.769752	4	.(.(((((((.(((((((((((&))))))))))).)))))))-).	AGCCACGUGCACUGCUUCUCCA&UGGAGAAGCAGGGCACGUG-CA	4	385.134	0	0.00404605	Output/DS_TL/cleaveLand_result/t_plot/nta-miR164a_XM_016584328.1_925_TPlot.pdf
XM_016594427.1:3113	nta-miR167d	XM_016594427.1	MSTRG.14136	LOC107774783	PREDICTED: auxin response factor 6-like isoform X3 [Nicotiana tomentosiformis]	GO:0003677(DNA binding);GO:0003700(transcription factor activity, sequence-specific DNA binding);GO:0005515(protein binding);GO:0005634(nucleus);GO:0006351(transcription, DNA-templated);GO:0006355(regulation of transcription, DNA-templated);GO:0009733(response to auxin);GO:0009734(auxin-activated signaling pathway);GO:0009908(flower development)	04075(Plant hormone signal transduction)	3122	3113	0.796915	5	.((((((.(((((((((((..&..))))))))))).)))))).	GAGAUCAGGCUGGCAGCUUGU&UGAAGCUGCCAGCAUGAUCUA	32	3081.07	0	0.00404605	Output/DS_TL/cleaveLand_result/t_plot/nta-miR167d_XM_016594427.1_3113_TPlot.pdf
XM_016622319.1:609	nta-miR396b	XM_016622319.1	107799231	LOC107799231	PREDICTED: growth-regulating factor 9 [Nicotiana tomentosiformis]	GO:0005634(nucleus);GO:0048366(leaf development)	NA	619	609	0.874251	4	..((((((((((((.(((((((&)))))))-))))))))))))..	UCGUUCAAGAAAGCUUGUGGAA&UUCCACA-GCUUUCUUGAACUU	6	577.701	0	0.00404605	Output/DS_TL/cleaveLand_result/t_plot/nta-miR396b_XM_016622319.1_609_TPlot.pdf
XM_016625781.1:1718	nta-miR171b	XM_016625781.1	#N/A	#N/A	#N/A	#N/A	#N/A	1727	1718	0.908629	1	((.((((((((((((((((((&)))))))))))))))))).))	AGGGAUAUUGGCGCGGCUCAA&UUGAGCCGCGCCAAUAUCACU	12	1155.4	0	0.00404605	Output/DS_TL/cleaveLand_result/t_plot/nta-miR171b_XM_016625781.1_1718_TPlot.pdf
XM_016587224.1:993	nta-miR166a	XM_016587224.1	107768119	LOC107768119	PREDICTED: homeobox-leucine zipper protein ATHB-15-like [Nicotiana tomentosiformis]	GO:0003677(DNA binding);GO:0003700(transcription factor activity, sequence-specific DNA binding);GO:0005634(nucleus);GO:0006351(transcription, DNA-templated);GO:0006355(regulation of transcription, DNA-templated);GO:0008289(lipid binding);GO:0009855(determination of bilateral symmetry);GO:0009887(organ morphogenesis);GO:0009965(leaf morphogenesis);GO:0010014(meristem initiation);GO:0010073(merist…	NA	1002	993	0.848073	3.5	..((((((((((((((((((.&.))))))))))))))))))..	CUGGGAUGAAGCCUGGUCCGG&UCGGACCAGGCUUCAUUCCCC	5	481.417	1	0.00410528	Output/DS_TL/cleaveLand_result/t_plot/nta-miR166a_XM_016587224.1_993_TPlot.pdf
XM_016592247.1:421	nta-miR396b	XM_016592247.1	107772772	LOC107772772	PREDICTED: growth-regulating factor 1-like [Nicotiana tomentosiformis]	GO:0005524(ATP binding);GO:0005634(nucleus);GO:0006351(transcription, DNA-templated);GO:0006355(regulation of transcription, DNA-templated);GO:0048366(leaf development)	NA	431	421	0.874251	4	..(((((((((((.((((((((&))))))))-)))))))))))..	CCGUUCAAGAAAGCCUGUGGAA&UUCCACAG-CUUUCUUGAACUU	3	288.85	1	0.00410528	Output/DS_TL/cleaveLand_result/t_plot/nta-miR396b_XM_016592247.1_421_TPlot.pdf
MSTRG.9672.2:255	nta-miR6020b	MSTRG.9672.2	MSTRG.9672	LOC107761220	PREDICTED: TMV resistance protein N-like [Nicotiana tabacum]	GO:0005515(protein binding)	03040(Spliceosome);04141(Protein processing in endoplasmic reticulum);04144(Endocytosis)	264	255	0.849673	1	(((((((.(((((((((((((&))))))))))))).)))))))	GAAGAUAAUCGAAGAACAUUU&AAAUGUUCUUCGAGUAUCUUC	51	4910.46	0	0.00433443	Output/DS_TL/cleaveLand_result/t_plot/nta-miR6020b_MSTRG.9672.2_255_TPlot.pdf
XM_016635528.1:1694	nta-miR171b	XM_016635528.1	107810717	LOC107810717	PREDICTED: scarecrow-like protein 22 [Nicotiana tabacum]	GO:0003700(transcription factor activity, sequence-specific DNA binding);GO:0005634(nucleus);GO:0006355(regulation of transcription, DNA-templated);GO:0010492(maintenance of shoot apical meristem identity);GO:0043565(sequence-specific DNA binding);GO:0048768(root hair cell tip growth);GO:0051301(cell division)	04075(Plant hormone signal transduction)	1703	1694	0.908629	1	((.((((((((((((((((((&)))))))))))))))))).))	AGGGAUAUUGGCGCGGCUCAA&UUGAGCCGCGCCAAUAUCACU	15	1444.25	0	0.00433443	Output/DS_TL/cleaveLand_result/t_plot/nta-miR171b_XM_016635528.1_1694_TPlot.pdf
XM_016580371.1:2583	nta-miR167d	XM_016580371.1	MSTRG.9972	LOC107762058	PREDICTED: auxin response factor 6-like isoform X2 [Nicotiana tabacum]	GO:0003677(DNA binding);GO:0003700(transcription factor activity, sequence-specific DNA binding);GO:0005515(protein binding);GO:0005634(nucleus);GO:0006351(transcription, DNA-templated);GO:0006355(regulation of transcription, DNA-templated);GO:0009733(response to auxin);GO:0009734(auxin-activated signaling pathway);GO:0009908(flower development);GO:0009908(flower development)	04075(Plant hormone signal transduction);04075(Plant hormone signal transduction)	2592	2583	0.796915	5	.((((((.(((((((((((..&..))))))))))).)))))).	GAGAUCAGGCUGGCAGCUUGU&UGAAGCUGCCAGCAUGAUCUA	15	1444.25	0	0.00462272	Output/DS_TL/cleaveLand_result/t_plot/nta-miR167d_XM_016580371.1_2583_TPlot.pdf
XM_016592446.1:140	nta-miR160a	XM_016592446.1	107772993	LOC107772993	PREDICTED: auxin response factor 16-like [Nicotiana sylvestris]	GO:0003677(DNA binding);GO:0003700(transcription factor activity, sequence-specific DNA binding);GO:0005634(nucleus);GO:0006351(transcription, DNA-templated);GO:0006355(regulation of transcription, DNA-templated);GO:0007389(pattern specification process);GO:0009733(response to auxin);GO:0009734(auxin-activated signaling pathway);GO:0035198(miRNA binding);GO:0048829(root cap development);GO:005130…	04075(Plant hormone signal transduction)	149	140	1	1	.((((((((((((((((((((&)))))))))))))))))))).	AGGCAUACAGGGAGCCAGGCA&UGCCUGGCUCCCUGUAUGCCA	9	866.551	0	0.00462272	Output/DS_TL/cleaveLand_result/t_plot/nta-miR160a_XM_016592446.1_140_TPlot.pdf
XM_016605496.1:1629	nta-miR172c	XM_016605496.1	107784366	LOC107784366	PREDICTED: AP2-like ethylene-responsive transcription factor TOE3 isoform X1 [Nicotiana tabacum]	GO:0003677(DNA binding);GO:0003700(transcription factor activity, sequence-specific DNA binding);GO:0005634(nucleus);GO:0006351(transcription, DNA-templated);GO:0006355(regulation of transcription, DNA-templated);GO:0009908(flower development);GO:0010073(meristem maintenance);GO:0010093(specification of floral organ identity);GO:0019953(sexual reproduction);GO:0030154(cell differentiation);GO:004…	NA	1638	1629	0.997085	2	.((((((((((((((((((((&)))))))))))))))))))).	CUGCAGCAUCAUCAGGAUUCU&AGAAUCUUGAUGAUGCUGCAU	3	288.85	0	0.00462272	Output/DS_TL/cleaveLand_result/t_plot/nta-miR172c_XM_016605496.1_1629_TPlot.pdf
XM_016611152.1:990	nta-miR164a	XM_016611152.1	107789352	LOC107789352	PREDICTED: NAC domain-containing protein 100-like [Nicotiana tabacum]	GO:0003677(DNA binding);GO:0003700(transcription factor activity, sequence-specific DNA binding);GO:0005634(nucleus);GO:0006351(transcription, DNA-templated);GO:0006355(regulation of transcription, DNA-templated);GO:0007275(multicellular organism development)	03018(RNA degradation)	999	990	0.769752	4	.(.(((((((.(((((((((((&))))))))))).)))))))-).	AGUCACGUGCACUGCUUCUCCA&UGGAGAAGCAGGGCACGUG-CA	6	577.701	0	0.00462272	Output/DS_TL/cleaveLand_result/t_plot/nta-miR164a_XM_016611152.1_990_TPlot.pdf
XM_016625782.1:1708	nta-miR171b	XM_016625782.1	#N/A	#N/A	#N/A	#N/A	#N/A	1717	1708	0.908629	1	((.((((((((((((((((((&)))))))))))))))))).))	AGGGAUAUUGGCGCGGCUCAA&UUGAGCCGCGCCAAUAUCACU	25	2407.09	0	0.00462272	Output/DS_TL/cleaveLand_result/t_plot/nta-miR171b_XM_016625782.1_1708_TPlot.pdf
XM_016577663.1:893	nta-miR171c	XM_016577663.1	MSTRG.9198	LOC107759671	PREDICTED: scarecrow-like protein 15 [Nicotiana tabacum]	GO:0003700(transcription factor activity, sequence-specific DNA binding);GO:0005634(nucleus);GO:0006355(regulation of transcription, DNA-templated);GO:0030154(cell differentiation);GO:0043565(sequence-specific DNA binding);GO:0048831(regulation of shoot system development)	04075(Plant hormone signal transduction)	902	893	0.938667	1	((((.((((((((((((((((&)))))))))))))))).))))	GAUACUGGCACGGCUCAAUCA&UGAUUGAGCCGUGCCAAUAUC	50	4814.17	0	0.00491093	Output/DS_TL/cleaveLand_result/t_plot/nta-miR171c_XM_016577663.1_893_TPlot.pdf
XM_016584434.1:740	nta-miR171b	XM_016584434.1	107765749	LOC107765749	PREDICTED: nodulation-signaling pathway 2 protein-like [Nicotiana tabacum]	GO:0003700(transcription factor activity, sequence-specific DNA binding);GO:0005634(nucleus);GO:0006355(regulation of transcription, DNA-templated);GO:0043565(sequence-specific DNA binding)	04075(Plant hormone signal transduction)	749	740	0.835025	3	((((((((((((.((((((((&)))))))).))))))))))))	AGUGAUAUUGGUUCGGCUCAA&UUGAGCCGCGCCAAUAUCACU	7	673.984	0	0.00491093	Output/DS_TL/cleaveLand_result/t_plot/nta-miR171b_XM_016584434.1_740_TPlot.pdf
XM_016644129.1:541	nta-miR168d	XM_016644129.1	MSTRG.4248	LOC107818184	PREDICTED: probable calcium-binding protein CML36 [Nicotiana tomentosiformis]	GO:0005509(calcium ion binding);GO:0005515(protein binding);GO:0005886(plasma membrane);GO:0050832(defense response to fungus)	04626(Plant-pathogen interaction)	550	541	0.73913	6	..(((((((--((((((((((&))))))))))..)))))))..	GACCCGACC--CACCAAGCGA&UCGCUUGGUGCAGGUCGGGAA	162	15597.9	0	0.00491093	Output/DS_TL/cleaveLand_result/t_plot/nta-miR168d_XM_016644129.1_541_TPlot.pdf
XM_016644149.1:1489	nta-miR172a_R-1	XM_016644149.1	107818199	LOC107818199	PREDICTED: floral homeotic protein APETALA 2-like isoform X1 [Nicotiana tabacum]	GO:0010227(floral organ abscission);GO:0048316(seed development);GO:0048461(flower structural organization);GO:0080187(floral organ senescence);GO:0080187(floral organ senescence)	04075(Plant hormone signal transduction);04075(Plant hormone signal transduction)	1498	1489	1	2	(((((((((((((((((((.&.)))))))))))))))))))	UGCAGCAUCAUCAGGAUUCG&AGAAUCUUGAUGAUGCUGCA	7	673.984	0	0.00491093	Output/DS_TL/cleaveLand_result/t_plot/nta-miR172a_R-1_XM_016644149.1_1489_TPlot.pdf
XM_016605494.1:1674	nta-miR172c	XM_016605494.1	107784366	LOC107784366	PREDICTED: AP2-like ethylene-responsive transcription factor TOE3 isoform X1 [Nicotiana tabacum]	GO:0003677(DNA binding);GO:0003700(transcription factor activity, sequence-specific DNA binding);GO:0005634(nucleus);GO:0006351(transcription, DNA-templated);GO:0006355(regulation of transcription, DNA-templated);GO:0009908(flower development);GO:0010073(meristem maintenance);GO:0010093(specification of floral organ identity);GO:0019953(sexual reproduction);GO:0030154(cell differentiation);GO:004…	NA	1683	1674	0.997085	2	.((((((((((((((((((((&)))))))))))))))))))).	CUGCAGCAUCAUCAGGAUUCU&AGAAUCUUGAUGAUGCUGCAU	3	288.85	1	0.00492431	Output/DS_TL/cleaveLand_result/t_plot/nta-miR172c_XM_016605494.1_1674_TPlot.pdf
XR_001643054.1:1237	nta-miR171c	XR_001643054.1	#N/A	#N/A	#N/A	#N/A	#N/A	1246	1237	1	1	(((((((((((((((((((((&)))))))))))))))))))))	GAUAUUGGCGCGGCUCAAUCA&UGAUUGAGCCGUGCCAAUAUC	5	481.417	1	0.00492431	Output/DS_TL/cleaveLand_result/t_plot/nta-miR171c_XR_001643054.1_1237_TPlot.pdf
XM_016609388.1:2300	nta-miR167d	XM_016609388.1	MSTRG.18251	LOC107787782	PREDICTED: auxin response factor 8-like [Nicotiana sylvestris]	GO:0003677(DNA binding);GO:0003700(transcription factor activity, sequence-specific DNA binding);GO:0005634(nucleus);GO:0006351(transcription, DNA-templated);GO:0006355(regulation of transcription, DNA-templated);GO:0009733(response to auxin);GO:0009734(auxin-activated signaling pathway);GO:0009908(flower development)	04075(Plant hormone signal transduction)	2309	2300	0.794344	5	.((((((.(((((((((((..&..))))))))))).)))))).	AAGAUCAGGCUGGCAGCUUGU&UGAAGCUGCCAGCAUGAUCUA	22	2118.24	0	0.00519905	Output/DS_TL/cleaveLand_result/t_plot/nta-miR167d_XM_016609388.1_2300_TPlot.pdf
XM_016617605.1:608	nta-miR396b	XM_016617605.1	107795016	LOC107795016	PREDICTED: growth-regulating factor 9 isoform X2 [Nicotiana sylvestris]	GO:0005634(nucleus);GO:0048366(leaf development);GO:0048366(leaf development)	NA	618	608	0.874251	4	..((((((((((((.(((((((&)))))))-))))))))))))..	UCGUUCAAGAAAGCUUGUGGAA&UUCCACA-GCUUUCUUGAACUU	9	866.551	0	0.00519905	Output/DS_TL/cleaveLand_result/t_plot/nta-miR396b_XM_016617605.1_608_TPlot.pdf
XM_016640246.1:1891	nta-miR172c	XM_016640246.1	MSTRG.3125	LOC107814784	PREDICTED: ethylene-responsive transcription factor RAP2-7-like isoform X2 [Nicotiana tabacum]	GO:0003677(DNA binding);GO:0003700(transcription factor activity, sequence-specific DNA binding);GO:0005634(nucleus);GO:0006351(transcription, DNA-templated);GO:0006355(regulation of transcription, DNA-templated);GO:0009908(flower development);GO:0010073(meristem maintenance);GO:0010093(specification of floral organ identity);GO:0019953(sexual reproduction);GO:0030154(cell differentiation);GO:004…	04075(Plant hormone signal transduction);04075(Plant hormone signal transduction)	1900	1891	0.997085	2	.((((((((((((((((((((&)))))))))))))))))))).	CUGCAGCAUCAUCAGGAUUCU&AGAAUCUUGAUGAUGCUGCAU	10	962.835	1	0.00533358	Output/DS_TL/cleaveLand_result/t_plot/nta-miR172c_XM_016640246.1_1891_TPlot.pdf
XR_001643052.1:1237	nta-miR171c	XR_001643052.1	107763537	LOC107763537	PREDICTED: scarecrow-like protein 6 isoform X1 [Nicotiana tabacum]	GO:0003700(transcription factor activity, sequence-specific DNA binding);GO:0005634(nucleus);GO:0006355(regulation of transcription, DNA-templated);GO:0030154(cell differentiation);GO:0043565(sequence-specific DNA binding);GO:0043565(sequence-specific DNA binding)	04075(Plant hormone signal transduction);04075(Plant hormone signal transduction)	1246	1237	1	1	(((((((((((((((((((((&)))))))))))))))))))))	GAUAUUGGCGCGGCUCAAUCA&UGAUUGAGCCGUGCCAAUAUC	6	577.701	1	0.00533358	Output/DS_TL/cleaveLand_result/t_plot/nta-miR171c_XR_001643052.1_1237_TPlot.pdf
XM_016632892.1:1133	nta-miR396b	XM_016632892.1	MSTRG.24755	LOC107808379	PREDICTED: growth-regulating factor 1-like [Nicotiana sylvestris]	GO:0005515(protein binding);GO:0005524(ATP binding);GO:0005634(nucleus);GO:0006351(transcription, DNA-templated);GO:0006355(regulation of transcription, DNA-templated);GO:0009624(response to nematode);GO:0048364(root development);GO:0048366(leaf development);GO:0061062(regulation of nematode larval development)	NA	1143	1133	0.874251	4	..(((((((((((.((((((((&))))))))-)))))))))))..	UCGUUCAAGAAAGCCUGUGGAA&UUCCACAG-CUUUCUUGAACUU	76	7317.54	0	0.0054871	Output/DS_TL/cleaveLand_result/t_plot/nta-miR396b_XM_016632892.1_1133_TPlot.pdf
XM_016639982.1:2897	nta-miR167d	XM_016639982.1	107814545	LOC107814545	PREDICTED: auxin response factor 8-like [Nicotiana tabacum]	GO:0003677(DNA binding);GO:0003700(transcription factor activity, sequence-specific DNA binding);GO:0005634(nucleus);GO:0006351(transcription, DNA-templated);GO:0006355(regulation of transcription, DNA-templated);GO:0009733(response to auxin);GO:0009734(auxin-activated signaling pathway);GO:0009908(flower development)	04075(Plant hormone signal transduction)	2906	2897	0.794344	5	.((((((.(((((((((((..&..))))))))))).)))))).	AAGAUCAGGCUGGCAGCUUGU&UGAAGCUGCCAGCAUGAUCUA	20	1925.67	0	0.0054871	Output/DS_TL/cleaveLand_result/t_plot/nta-miR167d_XM_016639982.1_2897_TPlot.pdf
XM_016637923.1:3061	nta-miR167d	XM_016637923.1	MSTRG.26046	LOC107812758	PREDICTED: auxin response factor 8-like isoform X2 [Nicotiana tabacum]	GO:0003677(DNA binding);GO:0003700(transcription factor activity, sequence-specific DNA binding);GO:0005634(nucleus);GO:0006351(transcription, DNA-templated);GO:0006355(regulation of transcription, DNA-templated);GO:0009733(response to auxin);GO:0009734(auxin-activated signaling pathway);GO:0009908(flower development);GO:0009908(flower development)	04075(Plant hormone signal transduction);04075(Plant hormone signal transduction)	3070	3061	0.794344	5	.((((((.(((((((((((..&..))))))))))).)))))).	AAGAUCAGGCUGGCAGCUUGU&UGAAGCUGCCAGCAUGAUCUA	7	673.984	0	0.00577506	Output/DS_TL/cleaveLand_result/t_plot/nta-miR167d_XM_016637923.1_3061_TPlot.pdf
XM_016583362.1:1176	nta-miR396b	XM_016583362.1	MSTRG.10899	LOC107764760	PREDICTED: growth-regulating factor 1-like [Nicotiana tabacum]	GO:0005515(protein binding);GO:0005524(ATP binding);GO:0005634(nucleus);GO:0006351(transcription, DNA-templated);GO:0006355(regulation of transcription, DNA-templated);GO:0009624(response to nematode);GO:0048364(root development);GO:0048366(leaf development);GO:0061062(regulation of nematode larval development)	NA	1186	1176	0.874251	4	..(((((((((((.((((((((&))))))))-)))))))))))..	UCGUUCAAGAAAGCCUGUGGAA&UUCCACAG-CUUUCUUGAACUU	85	8184.09	0	0.00606293	Output/DS_TL/cleaveLand_result/t_plot/nta-miR396b_XM_016583362.1_1176_TPlot.pdf
XM_016602806.1:1828	nta-miR156g_L+1	XM_016602806.1	107781982	LOC107781982	PREDICTED: squamosa promoter-binding-like protein 2 [Nicotiana sylvestris]	GO:0003677(DNA binding);GO:0003700(transcription factor activity, sequence-specific DNA binding);GO:0005634(nucleus);GO:0006351(transcription, DNA-templated);GO:0006355(regulation of transcription, DNA-templated);GO:0044212(transcription regulatory region DNA binding);GO:0046872(metal ion binding);GO:0048510(regulation of timing of transition from vegetative to reproductive phase);GO:0048653(anth…	NA	1837	1828	0.922865	2	(((((((((.(((((((((((&))))))))))).)))))))))	GUGCUCUCUCUCUUCUGUCAA&UUGACAGAAGAUAGAGAGCAC	5	481.417	0	0.00606293	Output/DS_TL/cleaveLand_result/t_plot/nta-miR156g_L+1_XM_016602806.1_1828_TPlot.pdf
XM_016637925.1:2956	nta-miR167d	XM_016637925.1	MSTRG.26046	LOC107812758	PREDICTED: auxin response factor 8-like isoform X2 [Nicotiana tabacum]	GO:0003677(DNA binding);GO:0003700(transcription factor activity, sequence-specific DNA binding);GO:0005634(nucleus);GO:0006351(transcription, DNA-templated);GO:0006355(regulation of transcription, DNA-templated);GO:0009733(response to auxin);GO:0009734(auxin-activated signaling pathway);GO:0009908(flower development);GO:0009908(flower development)	04075(Plant hormone signal transduction);04075(Plant hormone signal transduction)	2965	2956	0.794344	5	.((((((.(((((((((((..&..))))))))))).)))))).	AAGAUCAGGCUGGCAGCUUGU&UGAAGCUGCCAGCAUGAUCUA	7	673.984	0	0.00606293	Output/DS_TL/cleaveLand_result/t_plot/nta-miR167d_XM_016637925.1_2956_TPlot.pdf
XM_016646177.1:1402	nta-miR166a	XM_016646177.1	MSTRG.4815	LOC107819982	PREDICTED: homeobox-leucine zipper protein ATHB-14-like isoform X2 [Nicotiana tomentosiformis]	GO:0003677(DNA binding);GO:0003700(transcription factor activity, sequence-specific DNA binding);GO:0005634(nucleus);GO:0006351(transcription, DNA-templated);GO:0006355(regulation of transcription, DNA-templated);GO:0008289(lipid binding);GO:0009855(determination of bilateral symmetry);GO:0009944(polarity specification of adaxial/abaxial axis);GO:0009955(adaxial/abaxial pattern specification);GO:…	NA	1411	1402	0.848073	3.5	..((((((((((((((((((.&.))))))))))))))))))..	UUGGGAUGAAGCCUGGUCCGG&UCGGACCAGGCUUCAUUCCCC	4	385.134	1	0.0061516	Output/DS_TL/cleaveLand_result/t_plot/nta-miR166a_XM_016646177.1_1402_TPlot.pdf
XM_016578083.1:1550	nta-miR160a	XM_016578083.1	107760064	LOC107760064	PREDICTED: auxin response factor 18-like isoform X2 [Nicotiana tabacum]	GO:0003677(DNA binding);GO:0003700(transcription factor activity, sequence-specific DNA binding);GO:0005634(nucleus);GO:0006351(transcription, DNA-templated);GO:0006355(regulation of transcription, DNA-templated);GO:0007389(pattern specification process);GO:0009734(auxin-activated signaling pathway);GO:0009738(abscisic acid-activated signaling pathway);GO:0009743(response to carbohydrate);GO:0010…	04075(Plant hormone signal transduction);04075(Plant hormone signal transduction)	1559	1550	0.859031	3	.(((((((((.((((((((((&)))))))))).))))))))).	AGGCAUACAGAGAGCCAGGCA&UGCCUGGCUCCCUGUAUGCCA	5	481.417	0	0.00635072	Output/DS_TL/cleaveLand_result/t_plot/nta-miR160a_XM_016578083.1_1550_TPlot.pdf
XM_016626963.1:1503	nta-miR156f	XM_016626963.1	107803280	LOC107803280	PREDICTED: squamosa promoter-binding-like protein 16 [Nicotiana tabacum]	GO:0003677(DNA binding);GO:0003700(transcription factor activity, sequence-specific DNA binding);GO:0005634(nucleus);GO:0006351(transcription, DNA-templated);GO:0006355(regulation of transcription, DNA-templated);GO:0046872(metal ion binding);GO:0048653(anther development);GO:0048653(anther development)	NA	1512	1503	0.902579	2	((((((..((((((((((((&))))))))))))..))))))	GUGCUCUCUCUCUUCUGUCA&UGACAGAAGAGAAUGAGCAC	4	385.134	0	0.00635072	Output/DS_TL/cleaveLand_result/t_plot/nta-miR156f_XM_016626963.1_1503_TPlot.pdf
XM_016627032.1:1384	nta-miR172a_R-1	XM_016627032.1	107803338	LOC107803338	PREDICTED: ethylene-responsive transcription factor RAP2-7-like isoform X2 [Nicotiana tabacum]	GO:0003677(DNA binding);GO:0003700(transcription factor activity, sequence-specific DNA binding);GO:0005634(nucleus);GO:0006351(transcription, DNA-templated);GO:0006355(regulation of transcription, DNA-templated);GO:0009908(flower development);GO:0010073(meristem maintenance);GO:0010093(specification of floral organ identity);GO:0019953(sexual reproduction);GO:0030154(cell differentiation);GO:004…	04075(Plant hormone signal transduction);04075(Plant hormone signal transduction)	1393	1384	1	2	(((((((((((((((((((.&.)))))))))))))))))))	UGCAGCAUCAUCAGGAUUCG&AGAAUCUUGAUGAUGCUGCA	4	385.134	1	0.00656035	Output/DS_TL/cleaveLand_result/t_plot/nta-miR172a_R-1_XM_016627032.1_1384_TPlot.pdf
XM_016647822.1:1367	nta-miR166a	XM_016647822.1	MSTRG.5270	LOC107821381	homeobox-leucine zipper protein ATHB-14-like [Nicotiana sylvestris]	GO:0003677(DNA binding);GO:0003700(transcription factor activity, sequence-specific DNA binding);GO:0005634(nucleus);GO:0006351(transcription, DNA-templated);GO:0006355(regulation of transcription, DNA-templated);GO:0008289(lipid binding);GO:0009855(determination of bilateral symmetry);GO:0009944(polarity specification of adaxial/abaxial axis);GO:0009955(adaxial/abaxial pattern specification);GO:…	NA	1376	1367	0.848073	3.5	..((((((((((((((((((.&.))))))))))))))))))..	UUGGGAUGAAGCCUGGUCCGG&UCGGACCAGGCUUCAUUCCCC	3	288.85	1	0.00656035	Output/DS_TL/cleaveLand_result/t_plot/nta-miR166a_XM_016647822.1_1367_TPlot.pdf
XM_016588078.1:1269	nta-miR156f	XM_016588078.1	MSTRG.12091	LOC107768912	teosinte glume architecture 1-like [Nicotiana tabacum]	GO:0003677(DNA binding);GO:0003700(transcription factor activity, sequence-specific DNA binding);GO:0005634(nucleus);GO:0006351(transcription, DNA-templated);GO:0006355(regulation of transcription, DNA-templated);GO:0046872(metal ion binding);GO:0048653(anther development);GO:0048653(anther development)	NA	1278	1269	0.902579	2	((((((..((((((((((((&))))))))))))..))))))	GUGCUCUCUCUCUUCUGUCA&UGACAGAAGAGAAUGAGCAC	5	481.417	0	0.00663843	Output/DS_TL/cleaveLand_result/t_plot/nta-miR156f_XM_016588078.1_1269_TPlot.pdf
XM_016590029.1:835	nta-miR396b	XM_016590029.1	MSTRG.12636	LOC107770693	PREDICTED: growth-regulating factor 3-like [Nicotiana sylvestris]	GO:0005524(ATP binding);GO:0005634(nucleus);GO:0006351(transcription, DNA-templated);GO:0006355(regulation of transcription, DNA-templated);GO:0008285(negative regulation of cell proliferation);GO:0009624(response to nematode);GO:0044212(transcription regulatory region DNA binding);GO:0048364(root development);GO:0048366(leaf development);GO:0061062(regulation of nematode larval development)	NA	845	835	0.874251	4	..(((((((((((.((((((((&))))))))-)))))))))))..	CCGUUCAAGAAAGCCUGUGGAA&UUCCACAG-CUUUCUUGAACUU	14	1347.97	0	0.00663843	Output/DS_TL/cleaveLand_result/t_plot/nta-miR396b_XM_016590029.1_835_TPlot.pdf
XM_016616659.1:1718	nta-miR160a	XM_016616659.1	107794188	LOC107794188	PREDICTED: auxin response factor 18-like [Nicotiana tabacum]	GO:0003677(DNA binding);GO:0003700(transcription factor activity, sequence-specific DNA binding);GO:0005634(nucleus);GO:0006351(transcription, DNA-templated);GO:0006355(regulation of transcription, DNA-templated);GO:0007389(pattern specification process);GO:0009734(auxin-activated signaling pathway);GO:0009738(abscisic acid-activated signaling pathway);GO:0009743(response to carbohydrate);GO:0010…	04075(Plant hormone signal transduction);04075(Plant hormone signal transduction)	1727	1718	0.859031	3	.(((((((((.((((((((((&)))))))))).))))))))).	AGGCAUACAGAGAGCCAGGCA&UGCCUGGCUCCCUGUAUGCCA	8	770.268	0	0.00663843	Output/DS_TL/cleaveLand_result/t_plot/nta-miR160a_XM_016616659.1_1718_TPlot.pdf
XM_016637924.1:3053	nta-miR167d	XM_016637924.1	MSTRG.26046	LOC107812758	PREDICTED: auxin response factor 8-like isoform X2 [Nicotiana tabacum]	GO:0003677(DNA binding);GO:0003700(transcription factor activity, sequence-specific DNA binding);GO:0005634(nucleus);GO:0006351(transcription, DNA-templated);GO:0006355(regulation of transcription, DNA-templated);GO:0009733(response to auxin);GO:0009734(auxin-activated signaling pathway);GO:0009908(flower development);GO:0009908(flower development)	04075(Plant hormone signal transduction);04075(Plant hormone signal transduction)	3062	3053	0.794344	5	.((((((.(((((((((((..&..))))))))))).)))))).	AAGAUCAGGCUGGCAGCUUGU&UGAAGCUGCCAGCAUGAUCUA	11	1059.12	0	0.00663843	Output/DS_TL/cleaveLand_result/t_plot/nta-miR167d_XM_016637924.1_3053_TPlot.pdf
XM_016578084.1:1468	nta-miR160a	XM_016578084.1	107760064	LOC107760064	PREDICTED: auxin response factor 18-like isoform X2 [Nicotiana tabacum]	GO:0003677(DNA binding);GO:0003700(transcription factor activity, sequence-specific DNA binding);GO:0005634(nucleus);GO:0006351(transcription, DNA-templated);GO:0006355(regulation of transcription, DNA-templated);GO:0007389(pattern specification process);GO:0009734(auxin-activated signaling pathway);GO:0009738(abscisic acid-activated signaling pathway);GO:0009743(response to carbohydrate);GO:0010…	04075(Plant hormone signal transduction);04075(Plant hormone signal transduction)	1477	1468	0.859031	3	.(((((((((.((((((((((&)))))))))).))))))))).	AGGCAUACAGAGAGCCAGGCA&UGCCUGGCUCCCUGUAUGCCA	6	577.701	0	0.00692606	Output/DS_TL/cleaveLand_result/t_plot/nta-miR160a_XM_016578084.1_1468_TPlot.pdf
XM_016617679.1:608	nta-miR396b	XM_016617679.1	107795016	LOC107795016	PREDICTED: growth-regulating factor 9 isoform X2 [Nicotiana sylvestris]	GO:0005634(nucleus);GO:0048366(leaf development);GO:0048366(leaf development)	NA	618	608	0.874251	4	..((((((((((((.(((((((&)))))))-))))))))))))..	UCGUUCAAGAAAGCUUGUGGAA&UUCCACA-GCUUUCUUGAACUU	7	673.984	0	0.00692606	Output/DS_TL/cleaveLand_result/t_plot/nta-miR396b_XM_016617679.1_608_TPlot.pdf
XM_016578081.1:1555	nta-miR160a	XM_016578081.1	107760064	LOC107760064	PREDICTED: auxin response factor 18-like isoform X2 [Nicotiana tabacum]	GO:0003677(DNA binding);GO:0003700(transcription factor activity, sequence-specific DNA binding);GO:0005634(nucleus);GO:0006351(transcription, DNA-templated);GO:0006355(regulation of transcription, DNA-templated);GO:0007389(pattern specification process);GO:0009734(auxin-activated signaling pathway);GO:0009738(abscisic acid-activated signaling pathway);GO:0009743(response to carbohydrate);GO:0010…	04075(Plant hormone signal transduction);04075(Plant hormone signal transduction)	1564	1555	0.859031	3	.(((((((((.((((((((((&)))))))))).))))))))).	AGGCAUACAGAGAGCCAGGCA&UGCCUGGCUCCCUGUAUGCCA	5	481.417	0	0.0072136	Output/DS_TL/cleaveLand_result/t_plot/nta-miR160a_XM_016578081.1_1555_TPlot.pdf
XM_016629060.1:1595	nta-miR6025a	XM_016629060.1	107805080	LOC107805080	PREDICTED: G-type lectin S-receptor-like serine/threonine-protein kinase CES101 isoform X3 [Nicotiana tomentosiformis]	GO:0004674(protein serine/threonine kinase activity);GO:0005886(plasma membrane);GO:0006468(protein phosphorylation);GO:0006952(defense response);GO:0009506(plasmodesma)	00520(Amino sugar and nucleotide sugar metabolism)	1604	1595	0.824615	4	((((((((((((((..((((((&))))))..))))))))))))))	GAUGUUAUCUCAAUGCUUGGUA&UACCAACAAUUGAGAUAACAUC	15	1444.25	0	0.0072136	Output/DS_TL/cleaveLand_result/t_plot/nta-miR6025a_XM_016629060.1_1595_TPlot.pdf
XM_016657318.1:1741	nta-miR167d	XM_016657318.1	MSTRG.8049	LOC107829853	PREDICTED: auxin response factor 8-like [Nicotiana tabacum]	GO:0003677(DNA binding);GO:0003700(transcription factor activity, sequence-specific DNA binding);GO:0005634(nucleus);GO:0006351(transcription, DNA-templated);GO:0006355(regulation of transcription, DNA-templated);GO:0009733(response to auxin);GO:0009734(auxin-activated signaling pathway);GO:0009908(flower development)	04075(Plant hormone signal transduction)	1750	1741	0.794344	5	.((((((.(((((((((((..&..))))))))))).)))))).	AAGAUCAGGCUGGCAGCUUGU&UGAAGCUGCCAGCAUGAUCUA	65	6258.42	0	0.0072136	Output/DS_TL/cleaveLand_result/t_plot/nta-miR167d_XM_016657318.1_1741_TPlot.pdf
XM_016583599.1:1783	nta-MIR398-p5	XM_016583599.1	107765023	LOC107765023	PREDICTED: receptor-like serine/threonine-protein kinase NCRK isoform X1 [Nicotiana tabacum]	GO:0004674(protein serine/threonine kinase activity);GO:0005524(ATP binding);GO:0005768(endosome);GO:0005886(plasma membrane);GO:0006468(protein phosphorylation);GO:0010008(endosome membrane);GO:0010089(xylem development);GO:0012505(endomembrane system);GO:0016021(integral component of membrane);GO:0016301(kinase activity);GO:0031902(late endosome membrane);GO:0051020(GTPase binding);GO:0051020(G…	04626(Plant-pathogen interaction);04626(Plant-pathogen interaction)	1793	1783	0.721805	7	((((((((((((((.(((((..&..)))))-))))))))))))))	CGUGUGGUCUUAGAGUUGCCAG&GGGGCAA-UCUGAGAUCACAUG	2	192.567	1	0.00737737	Output/DS_TL/cleaveLand_result/t_plot/nta-MIR398-p5_XM_016583599.1_1783_TPlot.pdf
XM_016582129.1:1148	nta-miR396b	XM_016582129.1	107763641	LOC107763641	PREDICTED: growth-regulating factor 1-like [Nicotiana tabacum]	GO:0005515(protein binding);GO:0005524(ATP binding);GO:0005634(nucleus);GO:0006351(transcription, DNA-templated);GO:0006355(regulation of transcription, DNA-templated);GO:0009624(response to nematode);GO:0048364(root development);GO:0048366(leaf development);GO:0061062(regulation of nematode larval development)	NA	1158	1148	0.874251	4	..(((((((((((.((((((((&))))))))-)))))))))))..	UCGUUCAAGAAAGCCUGUGGAA&UUCCACAG-CUUUCUUGAACUU	60	5777.01	0	0.00750106	Output/DS_TL/cleaveLand_result/t_plot/nta-miR396b_XM_016582129.1_1148_TPlot.pdf
XM_016616657.1:1848	nta-miR160a	XM_016616657.1	107794188	LOC107794188	PREDICTED: auxin response factor 18-like [Nicotiana tabacum]	GO:0003677(DNA binding);GO:0003700(transcription factor activity, sequence-specific DNA binding);GO:0005634(nucleus);GO:0006351(transcription, DNA-templated);GO:0006355(regulation of transcription, DNA-templated);GO:0007389(pattern specification process);GO:0009734(auxin-activated signaling pathway);GO:0009738(abscisic acid-activated signaling pathway);GO:0009743(response to carbohydrate);GO:0010…	04075(Plant hormone signal transduction);04075(Plant hormone signal transduction)	1857	1848	0.859031	3	.(((((((((.((((((((((&)))))))))).))))))))).	AGGCAUACAGAGAGCCAGGCA&UGCCUGGCUCCCUGUAUGCCA	4	385.134	0	0.00750106	Output/DS_TL/cleaveLand_result/t_plot/nta-miR160a_XM_016616657.1_1848_TPlot.pdf
XM_016602798.1:2549	nta-miR156g_L+1	XM_016602798.1	107781982	LOC107781982	PREDICTED: squamosa promoter-binding-like protein 2 [Nicotiana sylvestris]	GO:0003677(DNA binding);GO:0003700(transcription factor activity, sequence-specific DNA binding);GO:0005634(nucleus);GO:0006351(transcription, DNA-templated);GO:0006355(regulation of transcription, DNA-templated);GO:0044212(transcription regulatory region DNA binding);GO:0046872(metal ion binding);GO:0048510(regulation of timing of transition from vegetative to reproductive phase);GO:0048653(anth…	NA	2558	2549	0.922865	2	(((((((((.(((((((((((&))))))))))).)))))))))	GUGCUCUCUCUCUUCUGUCAA&UUGACAGAAGAUAGAGAGCAC	2	192.567	0	0.00807573	Output/DS_TL/cleaveLand_result/t_plot/nta-miR156g_L+1_XM_016602798.1_2549_TPlot.pdf
MSTRG.9031.1:94	nta-miR172a_R-1	MSTRG.9031.1	MSTRG.9031	.	0	NA	NA	103	94	0.993976	2	(((((((((((((((((((.&.)))))))))))))))))))	UGCAGCAUCAUCAGGAUUCC&AGAAUCUUGAUGAUGCUGCA	14	1347.97	0	0.00836294	Output/DS_TL/cleaveLand_result/t_plot/nta-miR172a_R-1_MSTRG.9031.1_94_TPlot.pdf
XM_016616660.1:1609	nta-miR160a	XM_016616660.1	107794188	LOC107794188	PREDICTED: auxin response factor 18-like [Nicotiana tabacum]	GO:0003677(DNA binding);GO:0003700(transcription factor activity, sequence-specific DNA binding);GO:0005634(nucleus);GO:0006351(transcription, DNA-templated);GO:0006355(regulation of transcription, DNA-templated);GO:0007389(pattern specification process);GO:0009734(auxin-activated signaling pathway);GO:0009738(abscisic acid-activated signaling pathway);GO:0009743(response to carbohydrate);GO:0010…	04075(Plant hormone signal transduction);04075(Plant hormone signal transduction)	1618	1609	0.859031	3	.(((((((((.((((((((((&)))))))))).))))))))).	AGGCAUACAGAGAGCCAGGCA&UGCCUGGCUCCCUGUAUGCCA	5	481.417	0	0.00836294	Output/DS_TL/cleaveLand_result/t_plot/nta-miR160a_XM_016616660.1_1609_TPlot.pdf
XM_016633965.1:1019	nta-miR169q_R-1_1ss7AG	XM_016633965.1	MSTRG.25029	LOC107809359	PREDICTED: nuclear transcription factor Y subunit A-7-like [Nicotiana tabacum]	GO:0003677(DNA binding);GO:0003700(transcription factor activity, sequence-specific DNA binding);GO:0005634(nucleus);GO:0006351(transcription, DNA-templated);GO:0006355(regulation of transcription, DNA-templated);GO:0016602(CCAAT-binding factor complex);GO:0016602(CCAAT-binding factor complex)	00970(Aminoacyl-tRNA biosynthesis);00970(Aminoacyl-tRNA biosynthesis)	1028	1019	0.747619	6.5	(((((((....((((((((((((.&.))))))))))))----)))))))	CGGCAGGCAACUCAUCCUUGGCUU&CAGCCAGGGAUGA----CUUGCCG	6	577.701	0	0.00836294	Output/DS_TL/cleaveLand_result/t_plot/nta-miR169q_R-1_1ss7AG_XM_016633965.1_1019_TPlot.pdf
XM_016616661.1:1495	nta-miR160a	XM_016616661.1	107794188	LOC107794188	PREDICTED: auxin response factor 18-like [Nicotiana tabacum]	GO:0003677(DNA binding);GO:0003700(transcription factor activity, sequence-specific DNA binding);GO:0005634(nucleus);GO:0006351(transcription, DNA-templated);GO:0006355(regulation of transcription, DNA-templated);GO:0007389(pattern specification process);GO:0009734(auxin-activated signaling pathway);GO:0009738(abscisic acid-activated signaling pathway);GO:0009743(response to carbohydrate);GO:0010…	04075(Plant hormone signal transduction);04075(Plant hormone signal transduction)	1504	1495	0.859031	3	.(((((((((.((((((((((&)))))))))).))))))))).	AGGCAUACAGAGAGCCAGGCA&UGCCUGGCUCCCUGUAUGCCA	3	288.85	0	0.00865007	Output/DS_TL/cleaveLand_result/t_plot/nta-miR160a_XM_016616661.1_1495_TPlot.pdf
XM_016616658.1:1762	nta-miR160a	XM_016616658.1	107794188	LOC107794188	PREDICTED: auxin response factor 18-like [Nicotiana tabacum]	GO:0003677(DNA binding);GO:0003700(transcription factor activity, sequence-specific DNA binding);GO:0005634(nucleus);GO:0006351(transcription, DNA-templated);GO:0006355(regulation of transcription, DNA-templated);GO:0007389(pattern specification process);GO:0009734(auxin-activated signaling pathway);GO:0009738(abscisic acid-activated signaling pathway);GO:0009743(response to carbohydrate);GO:0010…	04075(Plant hormone signal transduction);04075(Plant hormone signal transduction)	1771	1762	0.859031	3	.(((((((((.((((((((((&)))))))))).))))))))).	AGGCAUACAGAGAGCCAGGCA&UGCCUGGCUCCCUGUAUGCCA	9	866.551	0	0.00893711	Output/DS_TL/cleaveLand_result/t_plot/nta-miR160a_XM_016616658.1_1762_TPlot.pdf
XM_016626966.1:1506	nta-miR156f	XM_016626966.1	107803280	LOC107803280	PREDICTED: squamosa promoter-binding-like protein 16 [Nicotiana tabacum]	GO:0003677(DNA binding);GO:0003700(transcription factor activity, sequence-specific DNA binding);GO:0005634(nucleus);GO:0006351(transcription, DNA-templated);GO:0006355(regulation of transcription, DNA-templated);GO:0046872(metal ion binding);GO:0048653(anther development);GO:0048653(anther development)	NA	1515	1506	0.902579	2	((((((..((((((((((((&))))))))))))..))))))	GUGCUCUCUCUCUUCUGUCA&UGACAGAAGAGAAUGAGCAC	3	288.85	0	0.00893711	Output/DS_TL/cleaveLand_result/t_plot/nta-miR156f_XM_016626966.1_1506_TPlot.pdf
XM_016578085.1:1620	nta-miR160a	XM_016578085.1	107760064	LOC107760064	PREDICTED: auxin response factor 18-like isoform X2 [Nicotiana tabacum]	GO:0003677(DNA binding);GO:0003700(transcription factor activity, sequence-specific DNA binding);GO:0005634(nucleus);GO:0006351(transcription, DNA-templated);GO:0006355(regulation of transcription, DNA-templated);GO:0007389(pattern specification process);GO:0009734(auxin-activated signaling pathway);GO:0009738(abscisic acid-activated signaling pathway);GO:0009743(response to carbohydrate);GO:0010…	04075(Plant hormone signal transduction);04075(Plant hormone signal transduction)	1629	1620	0.859031	3	.(((((((((.((((((((((&)))))))))).))))))))).	AGGCAUACAGAGAGCCAGGCA&UGCCUGGCUCCCUGUAUGCCA	4	385.134	0	0.00922407	Output/DS_TL/cleaveLand_result/t_plot/nta-miR160a_XM_016578085.1_1620_TPlot.pdf
XM_016603172.1:570	nta-miR396b	XM_016603172.1	107782296	LOC107782296	PREDICTED: growth-regulating factor 4-like isoform X1 [Nicotiana tabacum]	GO:0005524(ATP binding);GO:0005634(nucleus);GO:0006351(transcription, DNA-templated);GO:0006355(regulation of transcription, DNA-templated);GO:0048366(leaf development);GO:0048366(leaf development)	NA	580	570	0.868263	4	..((((((((((((.(((((((&)))))))-))))))))))))..	CCGUUCAAGAAAGCAUGUGGAA&UUCCACA-GCUUUCUUGAACUU	5	481.417	0	0.00951095	Output/DS_TL/cleaveLand_result/t_plot/nta-miR396b_XM_016603172.1_570_TPlot.pdf
XR_001654099.1:1492	nta-miR172a_R-1	XR_001654099.1	MSTRG.25919	LOC107812324	PREDICTED: AP2-like ethylene-responsive transcription factor TOE3 [Nicotiana sylvestris]	GO:0010227(floral organ abscission);GO:0048316(seed development);GO:0048461(flower structural organization);GO:0080187(floral organ senescence)	04075(Plant hormone signal transduction)	1501	1492	0.993976	2	(((((((((((((((((((.&.)))))))))))))))))))	UGCAGCAUCAUCAGGAUUCC&AGAAUCUUGAUGAUGCUGCA	19	1829.39	0	0.00979774	Output/DS_TL/cleaveLand_result/t_plot/nta-miR172a_R-1_XR_001654099.1_1492_TPlot.pdf
XM_016588077.1:1972	nta-miR156a	XM_016588077.1	MSTRG.12091	LOC107768912	teosinte glume architecture 1-like [Nicotiana tabacum]	GO:0003677(DNA binding);GO:0003700(transcription factor activity, sequence-specific DNA binding);GO:0005634(nucleus);GO:0006351(transcription, DNA-templated);GO:0006355(regulation of transcription, DNA-templated);GO:0046872(metal ion binding);GO:0048653(anther development);GO:0048653(anther development)	NA	1981	1972	0.932796	1	((((((.(((((((((((((&))))))))))))).))))))	GUGCUCUCUCUCUUCUGUCA&UGACAGAAGAGAGUGAGCAC	3	288.85	1	0.00982438	Output/DS_TL/cleaveLand_result/t_plot/nta-miR156a_XM_016588077.1_1972_TPlot.pdf
XM_016626372.1:861	nta-miR396b	XM_016626372.1	107802800	LOC107802800	PREDICTED: growth-regulating factor 4-like isoform X2 [Nicotiana tomentosiformis]	GO:0005524(ATP binding);GO:0005634(nucleus);GO:0006351(transcription, DNA-templated);GO:0006355(regulation of transcription, DNA-templated);GO:0048366(leaf development);GO:0048366(leaf development)	NA	871	861	0.868263	4	..(((((((((((.((((((((&))))))))-)))))))))))..	CCGUUCAAGAAAGCCUGUGGAA&UUCCACAG-CUUUCUUGAACUU	7	673.984	0	0.0100845	Output/DS_TL/cleaveLand_result/t_plot/nta-miR396b_XM_016626372.1_861_TPlot.pdf
XM_016652122.1:561	nta-miR396b	XM_016652122.1	#N/A	#N/A	#N/A	#N/A	#N/A	571	561	0.868263	4	..(((((((((((.((((((((&))))))))-)))))))))))..	CCGUUCAAGAAAGCCUGUGGAA&UUCCACAG-CUUUCUUGAACUU	3	288.85	0	0.0103711	Output/DS_TL/cleaveLand_result/t_plot/nta-miR396b_XM_016652122.1_561_TPlot.pdf
XM_016652120.1:624	nta-miR396b	XM_016652120.1	107825286	LOC107825286	PREDICTED: growth-regulating factor 4-like [Nicotiana tabacum]	GO:0005524(ATP binding);GO:0005634(nucleus);GO:0006351(transcription, DNA-templated);GO:0006355(regulation of transcription, DNA-templated);GO:0048366(leaf development);GO:0048366(leaf development)	NA	634	624	0.868263	4	..(((((((((((.((((((((&))))))))-)))))))))))..	CCGUUCAAGAAAGCCUGUGGAA&UUCCACAG-CUUUCUUGAACUU	7	673.984	0	0.0106576	Output/DS_TL/cleaveLand_result/t_plot/nta-miR396b_XM_016652120.1_624_TPlot.pdf
XM_016633962.1:1075	nta-miR169q_R-1_1ss7AG	XM_016633962.1	MSTRG.25029	LOC107809359	PREDICTED: nuclear transcription factor Y subunit A-7-like [Nicotiana tabacum]	GO:0003677(DNA binding);GO:0003700(transcription factor activity, sequence-specific DNA binding);GO:0005634(nucleus);GO:0006351(transcription, DNA-templated);GO:0006355(regulation of transcription, DNA-templated);GO:0016602(CCAAT-binding factor complex);GO:0016602(CCAAT-binding factor complex)	00970(Aminoacyl-tRNA biosynthesis);00970(Aminoacyl-tRNA biosynthesis)	1084	1075	0.747619	6.5	(((((((....((((((((((((.&.))))))))))))----)))))))	CGGCAGGCAACUCAUCCUUGGCUU&CAGCCAGGGAUGA----CUUGCCG	4	385.134	1	0.0110456	Output/DS_TL/cleaveLand_result/t_plot/nta-miR169q_R-1_1ss7AG_XM_016633962.1_1075_TPlot.pdf
MSTRG.7965.2:1770	nta-miR6154a	MSTRG.7965.2	MSTRG.7965	.	0	NA	NA	1779	1770	0.798595	6	((((((.(((((((((((((.&.))))))))))))).))))))	GGCCUUCUUCCGGGGGGCCCG&UGGGUCUCCUGGAGAAAGGUC	15	1444.25	3	0.0112021	Output/DS_TL/cleaveLand_result/t_plot/nta-miR6154a_MSTRG.7965.2_1770_TPlot.pdf
XM_016601791.1:388	nta-MIR482c-p5	XM_016601791.1	MSTRG.16157	LOC107781147	PREDICTED: putative cytochrome c oxidase subunit 5b-like [Nicotiana tabacum]	GO:0004129(cytochrome-c oxidase activity);GO:0005739(mitochondrion);GO:0005740(mitochondrial envelope);GO:0005743(mitochondrial inner membrane);GO:0008270(zinc ion binding);GO:0009535(chloroplast thylakoid membrane);GO:0046872(metal ion binding);GO:0050897(cobalt ion binding)	00190(Oxidative phosphorylation)	397	388	0.811594	6.5	((((((((((((((.(.((((&)))).).))))))))))))))	GCUUUCCAACCCGCGGUUCCU&GGGAUUGGUGGGUUGGAAAGC	3	288.85	3	0.0112021	Output/DS_TL/cleaveLand_result/t_plot/nta-MIR482c-p5_XM_016601791.1_388_TPlot.pdf
XM_016627479.1:121	nta-miR6149a	XM_016627479.1	107803715	LOC107803715	PREDICTED: F-box/kelch-repeat protein At3g06240-like, partial [Nicotiana tabacum]	GO:0004842(ubiquitin-protein transferase activity);GO:0019005(SCF ubiquitin ligase complex);GO:0031146(SCF-dependent proteasomal ubiquitin-dependent protein catabolic process)	00970(Aminoacyl-tRNA biosynthesis)	130	121	0.838462	3	..(((((((((((((((((((&)))))))))))))))))))..	UACGAUUCAGGUGUGUAUCAA&UUGAUACGCACCUGAAUCGGC	8	770.268	3	0.0112021	Output/DS_TL/cleaveLand_result/t_plot/nta-miR6149a_XM_016627479.1_121_TPlot.pdf
XM_016630732.1:894	nta-miR156a	XM_016630732.1	107806562	LOC107806562	PREDICTED: squamosa promoter-binding-like protein 7 isoform X2 [Nicotiana sylvestris]	GO:0003677(DNA binding);GO:0003700(transcription factor activity, sequence-specific DNA binding);GO:0005634(nucleus);GO:0006351(transcription, DNA-templated);GO:0006355(regulation of transcription, DNA-templated);GO:0046872(metal ion binding);GO:0048510(regulation of timing of transition from vegetative to reproductive phase)	04075(Plant hormone signal transduction)	903	894	1	0	((((((((((((((((((((&))))))))))))))))))))	GUGCUCACUCUCUUCUGUCA&UGACAGAAGAGAGUGAGCAC	2	192.567	3	0.0112021	Output/DS_TL/cleaveLand_result/t_plot/nta-miR156a_XM_016630732.1_894_TPlot.pdf
XM_016638052.1:1447	nta-miR396b	XM_016638052.1	107812877	LOC107812877	PREDICTED: growth-regulating factor 5-like isoform X2 [Nicotiana sylvestris]	GO:0005524(ATP binding);GO:0005634(nucleus);GO:0006351(transcription, DNA-templated);GO:0006355(regulation of transcription, DNA-templated);GO:0048366(leaf development);GO:0048366(leaf development)	NA	1457	1447	0.868263	4	..((((((((((((.(((((((&)))))))-))))))))))))..	CCGUUCAAGAAAGCAUGUGGAA&UUCCACA-GCUUUCUUGAACUU	10	962.835	0	0.0112305	Output/DS_TL/cleaveLand_result/t_plot/nta-miR396b_XM_016638052.1_1447_TPlot.pdf
XM_016578082.1:1508	nta-miR160a	XM_016578082.1	107760064	LOC107760064	PREDICTED: auxin response factor 18-like isoform X2 [Nicotiana tabacum]	GO:0003677(DNA binding);GO:0003700(transcription factor activity, sequence-specific DNA binding);GO:0005634(nucleus);GO:0006351(transcription, DNA-templated);GO:0006355(regulation of transcription, DNA-templated);GO:0007389(pattern specification process);GO:0009734(auxin-activated signaling pathway);GO:0009738(abscisic acid-activated signaling pathway);GO:0009743(response to carbohydrate);GO:0010…	04075(Plant hormone signal transduction);04075(Plant hormone signal transduction)	1517	1508	0.859031	3	.(((((((((.((((((((((&)))))))))).))))))))).	AGGCAUACAGAGAGCCAGGCA&UGCCUGGCUCCCUGUAUGCCA	3	288.85	1	0.0114524	Output/DS_TL/cleaveLand_result/t_plot/nta-miR160a_XM_016578082.1_1508_TPlot.pdf
XM_016652124.1:620	nta-miR396b	XM_016652124.1	107825286	LOC107825286	PREDICTED: growth-regulating factor 4-like [Nicotiana tabacum]	GO:0005524(ATP binding);GO:0005634(nucleus);GO:0006351(transcription, DNA-templated);GO:0006355(regulation of transcription, DNA-templated);GO:0048366(leaf development);GO:0048366(leaf development)	NA	630	620	0.868263	4	..(((((((((((.((((((((&))))))))-)))))))))))..	CCGUUCAAGAAAGCCUGUGGAA&UUCCACAG-CUUUCUUGAACUU	4	385.134	0	0.0115168	Output/DS_TL/cleaveLand_result/t_plot/nta-miR396b_XM_016652124.1_620_TPlot.pdf
XM_016652121.1:620	nta-miR396b	XM_016652121.1	107825286	LOC107825286	PREDICTED: growth-regulating factor 4-like [Nicotiana tabacum]	GO:0005524(ATP binding);GO:0005634(nucleus);GO:0006351(transcription, DNA-templated);GO:0006355(regulation of transcription, DNA-templated);GO:0048366(leaf development);GO:0048366(leaf development)	NA	630	620	0.868263	4	..(((((((((((.((((((((&))))))))-)))))))))))..	CCGUUCAAGAAAGCCUGUGGAA&UUCCACAG-CUUUCUUGAACUU	3	288.85	0	0.011803	Output/DS_TL/cleaveLand_result/t_plot/nta-miR396b_XM_016652121.1_620_TPlot.pdf
XM_016622245.1:177	nta-miR396b	XM_016622245.1	107799160	LOC107799160	PREDICTED: growth-regulating factor 5-like [Nicotiana tabacum]	GO:0005634(nucleus);GO:0009739(response to gibberellin);GO:0030912(response to deep water)	NA	187	177	0.868263	4	..(((((((((((.((((((((&))))))))-)))))))))))..	CCGUUCAAGAAAGCCUGUGGAA&UUCCACAG-CUUUCUUGAACUU	8	770.268	0	0.0120891	Output/DS_TL/cleaveLand_result/t_plot/nta-miR396b_XM_016622245.1_177_TPlot.pdf
XM_016588081.1:1078	nta-miR156g_L+1	XM_016588081.1	MSTRG.12091	LOC107768912	teosinte glume architecture 1-like [Nicotiana tabacum]	GO:0003677(DNA binding);GO:0003700(transcription factor activity, sequence-specific DNA binding);GO:0005634(nucleus);GO:0006351(transcription, DNA-templated);GO:0006355(regulation of transcription, DNA-templated);GO:0046872(metal ion binding);GO:0048653(anther development);GO:0048653(anther development)	NA	1087	1078	0.906336	3	(((((((((.((((((((((.&.)))))))))).)))))))))	GUGCUCUCUCUCUUCUGUCAU&UUGACAGAAGAUAGAGAGCAC	4	385.134	0	0.0123752	Output/DS_TL/cleaveLand_result/t_plot/nta-miR156g_L+1_XM_016588081.1_1078_TPlot.pdf
XM_016598217.1:1420	nta-miR156a	XM_016598217.1	107778036	LOC107778036	squamosa promoter-binding-like protein 6 [Nicotiana tabacum]	GO:0003677(DNA binding);GO:0003700(transcription factor activity, sequence-specific DNA binding);GO:0005634(nucleus);GO:0006351(transcription, DNA-templated);GO:0006355(regulation of transcription, DNA-templated);GO:0010468(regulation of gene expression);GO:0042742(defense response to bacterium);GO:0046872(metal ion binding)	NA	1429	1420	0.930108	1	((((((.(((((((((((((&))))))))))))).))))))	GUGCUCUCUCUCUUCUGUCA&UGACAGAAGAGAGUGAGCAC	9	866.551	0	0.0123752	Output/DS_TL/cleaveLand_result/t_plot/nta-miR156a_XM_016598217.1_1420_TPlot.pdf
XM_016608085.1:1919	nta-miR169a_1ss7AG	XM_016608085.1	107786581	LOC107786581	PREDICTED: uncharacterized protein LOC107786581 isoform X2 [Nicotiana tabacum]	GO:0016787(hydrolase activity);GO:0016787(hydrolase activity)	NA	1928	1919	0.701595	5.5	.((((((.(((((((((((((.&.)))))))))))))-)))))).	CUGGCAAUGUUAUUCCUGGCUA&CAGCCAGGGAUGAC-UUGCCGA	4	385.134	0	0.0126611	Output/DS_TL/cleaveLand_result/t_plot/nta-miR169a_1ss7AG_XM_016608085.1_1919_TPlot.pdf
XM_016652123.1:618	nta-miR396b	XM_016652123.1	#N/A	#N/A	#N/A	#N/A	#N/A	628	618	0.868263	4	..(((((((((((.((((((((&))))))))-)))))))))))..	CCGUUCAAGAAAGCCUGUGGAA&UUCCACAG-CUUUCUUGAACUU	6	577.701	0	0.0126611	Output/DS_TL/cleaveLand_result/t_plot/nta-miR396b_XM_016652123.1_618_TPlot.pdf
MSTRG.1980.1:317	nta-miR827	MSTRG.1980.1	MSTRG.1980	.	0	NA	NA	326	317	0.897959	2	((((((((((((.((((((((&)))))))).))))))))))))	UGUUUGUUGAUGCUCAUCUAA&UUAGAUGAACAUCAACAAACA	2	192.567	2	0.012713	Output/DS_TL/cleaveLand_result/t_plot/nta-miR827_MSTRG.1980.1_317_TPlot.pdf
XM_016599514.1:970	nta-miR159	XM_016599514.1	107779158	LOC107779158	PREDICTED: transcription factor GAMYB-like isoform X1 [Nicotiana tabacum]	GO:0003677(DNA binding);GO:0003700(transcription factor activity, sequence-specific DNA binding);GO:0005634(nucleus);GO:0006355(regulation of transcription, DNA-templated);GO:0009723(response to ethylene);GO:0009740(gibberellic acid mediated signaling pathway);GO:0009751(response to salicylic acid);GO:0043068(positive regulation of programmed cell death);GO:0045893(positive regulation of transcri…	04626(Plant-pathogen interaction);04626(Plant-pathogen interaction)	979	970	0.917808	2.5	((((((((((((((.((((((&)))))).))))))))))))))	UGGAGCUCCCUUCACUCCAAA&UUUGGAUUGAAGGGAGCUCUA	2	192.567	2	0.012713	Output/DS_TL/cleaveLand_result/t_plot/nta-miR159_XM_016599514.1_970_TPlot.pdf
XM_016605063.1:792	nta-miR164c	XM_016605063.1	107784013	LOC107784013	PREDICTED: NAC domain-containing protein 21/22-like isoform X2 [Nicotiana tomentosiformis]	GO:0003677(DNA binding);GO:0003700(transcription factor activity, sequence-specific DNA binding);GO:0005634(nucleus);GO:0006351(transcription, DNA-templated);GO:0006355(regulation of transcription, DNA-templated);GO:0007275(multicellular organism development);GO:0009734(auxin-activated signaling pathway);GO:0010072(primary shoot apical meristem specification);GO:0048527(lateral root development);…	03018(RNA degradation);03018(RNA degradation)	801	792	0.927739	1	((((.((((((((((((((((&)))))))))))))))).))))	AGCAAGUGCCCUGCUUCUCCA&UGGAGAAGCAGGGCACAUGCU	2	192.567	2	0.012713	Output/DS_TL/cleaveLand_result/t_plot/nta-miR164c_XM_016605063.1_792_TPlot.pdf
XM_016625782.1:1711	nta-miR171c	XM_016625782.1	#N/A	#N/A	#N/A	#N/A	#N/A	1720	1711	1	1	(((((((((((((((((((((&)))))))))))))))))))))	GAUAUUGGCGCGGCUCAAUCA&UGAUUGAGCCGUGCCAAUAUC	5	481.417	2	0.012713	Output/DS_TL/cleaveLand_result/t_plot/nta-miR171c_XM_016625782.1_1711_TPlot.pdf
XM_016645923.1:1827	nta-miR172a_R-1	XM_016645923.1	MSTRG.4757	LOC107819773	PREDICTED: AP2-like ethylene-responsive transcription factor TOE3 isoform X3 [Nicotiana sylvestris]	GO:0003677(DNA binding);GO:0003700(transcription factor activity, sequence-specific DNA binding);GO:0005634(nucleus);GO:0006351(transcription, DNA-templated);GO:0006355(regulation of transcription, DNA-templated);GO:0009908(flower development);GO:0010073(meristem maintenance);GO:0010093(specification of floral organ identity);GO:0019953(sexual reproduction);GO:0030154(cell differentiation);GO:004…	04075(Plant hormone signal transduction);04075(Plant hormone signal transduction)	1836	1827	1	1	((((((((((((((((((((&))))))))))))))))))))	UGCAGCAUCAUCAGGAUUCU&AGAAUCUUGAUGAUGCUGCA	10	962.835	2	0.012713	Output/DS_TL/cleaveLand_result/t_plot/nta-miR172a_R-1_XM_016645923.1_1827_TPlot.pdf
XR_001642347.1:285	nta-MIR396c-p3	XR_001642347.1	107760167	LOC107760167	0	NA	NA	294	285	0.944615	0.5	((((((((((((((((((((&))))))))))))))))))))	UUUUCCACAGCUUUCUUGAA&UUCAAGAAAGCUGUGGGAAA	3	288.85	2	0.012713	Output/DS_TL/cleaveLand_result/t_plot/nta-MIR396c-p3_XR_001642347.1_285_TPlot.pdf
XR_001651410.1:575	nta-miR6020a-5p	XR_001651410.1	107800403	LOC107800403	PREDICTED: TMV resistance protein N-like [Nicotiana sylvestris]	GO:0005515(protein binding);GO:0005515(protein binding)	03040(Spliceosome);04141(Protein processing in endoplasmic reticulum);04144(Endocytosis);04144(Endocytosis)	584	575	1	1	(((((((((((((((((((((&)))))))))))))))))))))	GAAGAUACUCGGAAAACAUUU&AAAUGUUUUUCGAGUAUCUUC	2	192.567	2	0.012713	Output/DS_TL/cleaveLand_result/t_plot/nta-miR6020a-5p_XR_001651410.1_575_TPlot.pdf
XR_001657833.1:574	nta-MIR6146b-p3	XR_001657833.1	107829087	LOC107829087	0	NA	NA	584	574	0.879365	3	.((((((((((((.((((((((&))))))))-)))))))))))).	GCUUUGUCCAAUGAAACACUUA&UAAGUGUU-CAUUGGACAAAGA	3	288.85	2	0.012713	Output/DS_TL/cleaveLand_result/t_plot/nta-MIR6146b-p3_XR_001657833.1_574_TPlot.pdf
XM_016638050.1:847	nta-miR396b	XM_016638050.1	107812877	LOC107812877	PREDICTED: growth-regulating factor 5-like isoform X2 [Nicotiana sylvestris]	GO:0005524(ATP binding);GO:0005634(nucleus);GO:0006351(transcription, DNA-templated);GO:0006355(regulation of transcription, DNA-templated);GO:0048366(leaf development);GO:0048366(leaf development)	NA	857	847	0.868263	4	..((((((((((((.(((((((&)))))))-))))))))))))..	CCGUUCAAGAAAGCAUGUGGAA&UUCCACA-GCUUUCUUGAACUU	5	481.417	0	0.012947	Output/DS_TL/cleaveLand_result/t_plot/nta-miR396b_XM_016638050.1_847_TPlot.pdf
XM_016616527.1:1308	nta-miR167d	XM_016616527.1	107794072	LOC107794072	PREDICTED: MATE efflux family protein 5-like [Nicotiana sylvestris]	GO:0006855(drug transmembrane transport);GO:0015238(drug transmembrane transporter activity)	NA	1317	1308	0.773779	3.5	.(((-(.((((((((((((((&)))))))))))))).).))).	AGGA-CUUGCUGGCAGCUUCA&UGAAGCUGCCAGCAUGAUCUA	5	481.417	1	0.0130777	Output/DS_TL/cleaveLand_result/t_plot/nta-miR167d_XM_016616527.1_1308_TPlot.pdf
XM_016588079.1:1273	nta-miR156g_L+1	XM_016588079.1	MSTRG.12091	LOC107768912	teosinte glume architecture 1-like [Nicotiana tabacum]	GO:0003677(DNA binding);GO:0003700(transcription factor activity, sequence-specific DNA binding);GO:0005634(nucleus);GO:0006351(transcription, DNA-templated);GO:0006355(regulation of transcription, DNA-templated);GO:0046872(metal ion binding);GO:0048653(anther development);GO:0048653(anther development)	NA	1282	1273	0.906336	3	(((((((((.((((((((((.&.)))))))))).)))))))))	GUGCUCUCUCUCUUCUGUCAU&UUGACAGAAGAUAGAGAGCAC	4	385.134	0	0.0132328	Output/DS_TL/cleaveLand_result/t_plot/nta-miR156g_L+1_XM_016588079.1_1273_TPlot.pdf
XM_016638051.1:675	nta-miR396b	XM_016638051.1	#N/A	#N/A	#N/A	#N/A	#N/A	685	675	0.868263	4	..((((((((((((.(((((((&)))))))-))))))))))))..	CCGUUCAAGAAAGCAUGUGGAA&UUCCACA-GCUUUCUUGAACUU	5	481.417	0	0.0132328	Output/DS_TL/cleaveLand_result/t_plot/nta-miR396b_XM_016638051.1_675_TPlot.pdf
XM_016647076.1:1431	nta-miR156a	XM_016647076.1	107820735	LOC107820735	PREDICTED: squamosa promoter-binding-like protein 6 [Nicotiana sylvestris]	GO:0003677(DNA binding);GO:0003700(transcription factor activity, sequence-specific DNA binding);GO:0005634(nucleus);GO:0006351(transcription, DNA-templated);GO:0006355(regulation of transcription, DNA-templated);GO:0010468(regulation of gene expression);GO:0042742(defense response to bacterium);GO:0046872(metal ion binding)	NA	1440	1431	0.930108	1	((((((.(((((((((((((&))))))))))))).))))))	GUGCUCUCUCUCUUCUGUCA&UGACAGAAGAGAGUGAGCAC	16	1540.54	0	0.0132328	Output/DS_TL/cleaveLand_result/t_plot/nta-miR156a_XM_016647076.1_1431_TPlot.pdf
XM_016656719.1:2000	nta-miR319a_R-1	XM_016656719.1	MSTRG.7846	LOC107829243	PREDICTED: transcription factor TCP2-like [Nicotiana tabacum]	GO:0003677(DNA binding);GO:0003700(transcription factor activity, sequence-specific DNA binding);GO:0005515(protein binding);GO:0005634(nucleus);GO:0006351(transcription, DNA-templated);GO:0006355(regulation of transcription, DNA-templated);GO:0009637(response to blue light);GO:0009965(leaf morphogenesis);GO:0030154(cell differentiation);GO:0045962(positive regulation of development, heterochroni…	NA	2009	2000	0.769231	2.5	(((((.-(((((((((((((&)))))))))))))..)))))	GGGGGA-CCCUUCAGUCCAA&UUGGACUGAAGGGAGCUCCC	18	1733.1	0	0.0135185	Output/DS_TL/cleaveLand_result/t_plot/nta-miR319a_R-1_XM_016656719.1_2000_TPlot.pdf
XM_016626964.1:1175	nta-miR156g_L+1	XM_016626964.1	107803280	LOC107803280	PREDICTED: squamosa promoter-binding-like protein 16 [Nicotiana tabacum]	GO:0003677(DNA binding);GO:0003700(transcription factor activity, sequence-specific DNA binding);GO:0005634(nucleus);GO:0006351(transcription, DNA-templated);GO:0006355(regulation of transcription, DNA-templated);GO:0046872(metal ion binding);GO:0048653(anther development);GO:0048653(anther development)	NA	1184	1175	0.906336	3	(((((((((.((((((((((.&.)))))))))).)))))))))	GUGCUCUCUCUCUUCUGUCAU&UUGACAGAAGAUAGAGAGCAC	3	288.85	0	0.0140897	Output/DS_TL/cleaveLand_result/t_plot/nta-miR156g_L+1_XM_016626964.1_1175_TPlot.pdf
XM_016611687.1:1643	nta-miR156f	XM_016611687.1	107789814	LOC107789814	squamosa promoter-binding-like protein 6 [Nicotiana tabacum]	GO:0003677(DNA binding);GO:0003700(transcription factor activity, sequence-specific DNA binding);GO:0005634(nucleus);GO:0006351(transcription, DNA-templated);GO:0006355(regulation of transcription, DNA-templated);GO:0010468(regulation of gene expression);GO:0042742(defense response to bacterium);GO:0046872(metal ion binding)	NA	1652	1643	0.893983	2	((((((..((((((((((((&))))))))))))..))))))	GUGCUCUCUCUCUUCUGUCA&UGACAGAAGAGAAUGAGCAC	9	866.551	0	0.0143752	Output/DS_TL/cleaveLand_result/t_plot/nta-miR156f_XM_016611687.1_1643_TPlot.pdf
XM_016594406.1:1616	nta-miR156f	XM_016594406.1	107774760	LOC107774760	squamosa promoter-binding-like protein 6 [Nicotiana tabacum]	GO:0003677(DNA binding);GO:0003700(transcription factor activity, sequence-specific DNA binding);GO:0005634(nucleus);GO:0006351(transcription, DNA-templated);GO:0006355(regulation of transcription, DNA-templated);GO:0010468(regulation of gene expression);GO:0042742(defense response to bacterium);GO:0046872(metal ion binding);GO:0046872(metal ion binding)	NA	1625	1616	0.893983	2	((((((..((((((((((((&))))))))))))..))))))	GUGCUCUCUCUCUUCUGUCA&UGACAGAAGAGAAUGAGCAC	16	1540.54	0	0.0146606	Output/DS_TL/cleaveLand_result/t_plot/nta-miR156f_XM_016594406.1_1616_TPlot.pdf
XM_016640548.1:1371	nta-miR399a	XM_016640548.1	107815042	LOC107815042	PREDICTED: nuclear transcription factor Y subunit A-10-like isoform X4 [Nicotiana tabacum]	GO:0003677(DNA binding);GO:0003700(transcription factor activity, sequence-specific DNA binding);GO:0005634(nucleus);GO:0006351(transcription, DNA-templated);GO:0006355(regulation of transcription, DNA-templated);GO:0009567(double fertilization forming a zygote and endosperm);GO:0016602(CCAAT-binding factor complex);GO:0016602(CCAAT-binding factor complex)	NA	1379	1371	0.696231	7	.((((((((((.(((-(((((.&.))))).)))-)))))))))).	UGGGGCAGUUCAUCC-UUGGCU&CGCCAAAGGA-GAGCUGCCCUG	19	1829.39	0	0.0146606	Output/DS_TL/cleaveLand_result/t_plot/nta-miR399a_XM_016640548.1_1371_TPlot.pdf
XM_016589183.1:372	nta-MIR166g-p5_1ss19TA	XM_016589183.1	107769925	LOC107769925	PREDICTED: uncharacterized protein LOC107769925 [Nicotiana tabacum]	GO:0000209(protein polyubiquitination);GO:0042787(protein ubiquitination involved in ubiquitin-dependent protein catabolic process);GO:0043161(proteasome-mediated ubiquitin-dependent protein catabolic process);GO:0061630(ubiquitin protein ligase activity)	03013(RNA transport)	381	372	0.707865	5	((.((((((((((((((((.((&)).))))))))))))))))-))	UCAUCGGACUAGACAACGUGCU&AGAAUGUUGUCUGGUUCGA-GA	7	673.984	0	0.0149459	Output/DS_TL/cleaveLand_result/t_plot/nta-MIR166g-p5_1ss19TA_XM_016589183.1_372_TPlot.pdf
XM_016594405.1:1616	nta-miR156f	XM_016594405.1	107774760	LOC107774760	squamosa promoter-binding-like protein 6 [Nicotiana tabacum]	GO:0003677(DNA binding);GO:0003700(transcription factor activity, sequence-specific DNA binding);GO:0005634(nucleus);GO:0006351(transcription, DNA-templated);GO:0006355(regulation of transcription, DNA-templated);GO:0010468(regulation of gene expression);GO:0042742(defense response to bacterium);GO:0046872(metal ion binding);GO:0046872(metal ion binding)	NA	1625	1616	0.893983	2	((((((..((((((((((((&))))))))))))..))))))	GUGCUCUCUCUCUUCUGUCA&UGACAGAAGAGAAUGAGCAC	12	1155.4	0	0.0149459	Output/DS_TL/cleaveLand_result/t_plot/nta-miR156f_XM_016594405.1_1616_TPlot.pdf
XR_001647084.1:716	nta-miR6145a	XR_001647084.1	107781826	LOC107781826	PREDICTED: uncharacterized protein LOC107769872 [Nicotiana tabacum]	GO:0003674(molecular_function);GO:0005634(nucleus);GO:0008150(biological_process);GO:0008150(biological_process)	NA	725	716	0.718663	5	(((((((((-(.(((((((((.&.))))))))).).)))))))))	GUCAGUGCU-CUUGUGAAAGUU&CAUUUUCACAUGUAGCACUGAC	2	192.567	1	0.0151056	Output/DS_TL/cleaveLand_result/t_plot/nta-miR6145a_XR_001647084.1_716_TPlot.pdf
XM_016640549.1:1377	nta-miR399a	XM_016640549.1	107815042	LOC107815042	PREDICTED: nuclear transcription factor Y subunit A-10-like isoform X4 [Nicotiana tabacum]	GO:0003677(DNA binding);GO:0003700(transcription factor activity, sequence-specific DNA binding);GO:0005634(nucleus);GO:0006351(transcription, DNA-templated);GO:0006355(regulation of transcription, DNA-templated);GO:0009567(double fertilization forming a zygote and endosperm);GO:0016602(CCAAT-binding factor complex);GO:0016602(CCAAT-binding factor complex)	NA	1385	1377	0.696231	7	.((((((((((.(((-(((((.&.))))).)))-)))))))))).	UGGGGCAGUUCAUCC-UUGGCU&CGCCAAAGGA-GAGCUGCCCUG	8	770.268	0	0.0152311	Output/DS_TL/cleaveLand_result/t_plot/nta-miR399a_XM_016640549.1_1377_TPlot.pdf
XM_016596543.1:1484	nta-miR159	XM_016596543.1	107776631	LOC107776631	PREDICTED: uncharacterized protein LOC107776631 [Nicotiana tabacum]	NA	04144(Endocytosis)	1493	1484	0.767123	3.5	((((((.((((((((.(((((&))))).)))))))).))))))	UGGAGCCCCCUUCAAACCAAA&UUUGGAUUGAAGGGAGCUCUA	13	1251.68	0	0.0155162	Output/DS_TL/cleaveLand_result/t_plot/nta-miR159_XM_016596543.1_1484_TPlot.pdf
MSTRG.24915.1:1328	nta-miR399a	MSTRG.24915.1	MSTRG.24915	LOC107808910	PREDICTED: nuclear transcription factor Y subunit A-10-like [Nicotiana tabacum]	GO:0003677(DNA binding);GO:0003700(transcription factor activity, sequence-specific DNA binding);GO:0005634(nucleus);GO:0006351(transcription, DNA-templated);GO:0006355(regulation of transcription, DNA-templated);GO:0009567(double fertilization forming a zygote and endosperm);GO:0016602(CCAAT-binding factor complex)	NA	1336	1328	0.696231	7	.((((((((((.(((-(((((.&.))))).)))-)))))))))).	UGGGGCAGUUCAUCC-UUGGCU&CGCCAAAGGA-GAGCUGCCCUG	9	866.551	0	0.0160862	Output/DS_TL/cleaveLand_result/t_plot/nta-miR399a_MSTRG.24915.1_1328_TPlot.pdf
XM_016640550.1:1357	nta-miR399a	XM_016640550.1	107815042	LOC107815042	PREDICTED: nuclear transcription factor Y subunit A-10-like isoform X4 [Nicotiana tabacum]	GO:0003677(DNA binding);GO:0003700(transcription factor activity, sequence-specific DNA binding);GO:0005634(nucleus);GO:0006351(transcription, DNA-templated);GO:0006355(regulation of transcription, DNA-templated);GO:0009567(double fertilization forming a zygote and endosperm);GO:0016602(CCAAT-binding factor complex);GO:0016602(CCAAT-binding factor complex)	NA	1365	1357	0.696231	7	.((((((((((.(((-(((((.&.))))).)))-)))))))))).	UGGGGCAGUUCAUCC-UUGGCU&CGCCAAAGGA-GAGCUGCCCUG	11	1059.12	0	0.0163711	Output/DS_TL/cleaveLand_result/t_plot/nta-miR399a_XM_016640550.1_1357_TPlot.pdf
XM_016640551.1:1314	nta-miR399a	XM_016640551.1	107815042	LOC107815042	PREDICTED: nuclear transcription factor Y subunit A-10-like isoform X4 [Nicotiana tabacum]	GO:0003677(DNA binding);GO:0003700(transcription factor activity, sequence-specific DNA binding);GO:0005634(nucleus);GO:0006351(transcription, DNA-templated);GO:0006355(regulation of transcription, DNA-templated);GO:0009567(double fertilization forming a zygote and endosperm);GO:0016602(CCAAT-binding factor complex);GO:0016602(CCAAT-binding factor complex)	NA	1322	1314	0.696231	7	.((((((((((.(((-(((((.&.))))).)))-)))))))))).	UGGGGCAGUUCAUCC-UUGGCU&CGCCAAAGGA-GAGCUGCCCUG	13	1251.68	0	0.0166559	Output/DS_TL/cleaveLand_result/t_plot/nta-miR399a_XM_016640551.1_1314_TPlot.pdf
XM_016586032.1:508	nta-miR398_L+2R-2	XM_016586032.1	MSTRG.11570	LOC107767110	PREDICTED: tubulin-folding cofactor B-like [Nicotiana tomentosiformis]	GO:0005515(protein binding);GO:0005634(nucleus);GO:0005737(cytoplasm);GO:0005829(cytosol);GO:0007021(tubulin complex assembly);GO:0009524(phragmoplast);GO:0009793(embryo development ending in seed dormancy);GO:0051301(cell division);GO:0051301(cell division)	NA	517	508	0.683333	5.5	((.((.((((((((((((((((.&.))))))))))))))))-))-))	GGAGGUUGGCUUGAGGACACAUC&UAUGUGUUCUCAGGUCG-CC-CC	3	288.85	0	0.0172253	Output/DS_TL/cleaveLand_result/t_plot/nta-miR398_L+2R-2_XM_016586032.1_508_TPlot.pdf
XM_016640552.1:1301	nta-miR399a	XM_016640552.1	107815042	LOC107815042	PREDICTED: nuclear transcription factor Y subunit A-10-like isoform X4 [Nicotiana tabacum]	GO:0003677(DNA binding);GO:0003700(transcription factor activity, sequence-specific DNA binding);GO:0005634(nucleus);GO:0006351(transcription, DNA-templated);GO:0006355(regulation of transcription, DNA-templated);GO:0009567(double fertilization forming a zygote and endosperm);GO:0016602(CCAAT-binding factor complex);GO:0016602(CCAAT-binding factor complex)	NA	1309	1301	0.696231	7	.((((((((((.(((-(((((.&.))))).)))-)))))))))).	UGGGGCAGUUCAUCC-UUGGCU&CGCCAAAGGA-GAGCUGCCCUG	11	1059.12	0	0.0172253	Output/DS_TL/cleaveLand_result/t_plot/nta-miR399a_XM_016640552.1_1301_TPlot.pdf
XM_016603166.1:654	nta-miR396b	XM_016603166.1	107782296	LOC107782296	PREDICTED: growth-regulating factor 4-like isoform X1 [Nicotiana tabacum]	GO:0005524(ATP binding);GO:0005634(nucleus);GO:0006351(transcription, DNA-templated);GO:0006355(regulation of transcription, DNA-templated);GO:0048366(leaf development);GO:0048366(leaf development)	NA	664	654	0.868263	4	..((((((((((((.(((((((&)))))))-))))))))))))..	CCGUUCAAGAAAGCAUGUGGAA&UUCCACA-GCUUUCUUGAACUU	3	288.85	1	0.0175335	Output/DS_TL/cleaveLand_result/t_plot/nta-miR396b_XM_016603166.1_654_TPlot.pdf
XM_016590259.1:1792	nta-miR156a	XM_016590259.1	107770932	LOC107770932	squamosa promoter-binding-like protein 6 [Nicotiana tabacum]	GO:0003677(DNA binding);GO:0003700(transcription factor activity, sequence-specific DNA binding);GO:0005634(nucleus);GO:0006351(transcription, DNA-templated);GO:0006355(regulation of transcription, DNA-templated);GO:0010468(regulation of gene expression);GO:0042742(defense response to bacterium);GO:0046872(metal ion binding)	NA	1801	1792	0.846774	2	.(((((.(((((((((((((&))))))))))))).))))).	AUGCUCUCUCUCUUCUGUCA&UGACAGAAGAGAGUGAGCAC	24	2310.8	0	0.0177943	Output/DS_TL/cleaveLand_result/t_plot/nta-miR156a_XM_016590259.1_1792_TPlot.pdf
XM_016588077.1:1973	nta-miR156g_L+1	XM_016588077.1	MSTRG.12091	LOC107768912	teosinte glume architecture 1-like [Nicotiana tabacum]	GO:0003677(DNA binding);GO:0003700(transcription factor activity, sequence-specific DNA binding);GO:0005634(nucleus);GO:0006351(transcription, DNA-templated);GO:0006355(regulation of transcription, DNA-templated);GO:0046872(metal ion binding);GO:0048653(anther development);GO:0048653(anther development)	NA	1982	1973	0.906336	3	(((((((((.((((((((((.&.)))))))))).)))))))))	GUGCUCUCUCUCUUCUGUCAU&UUGACAGAAGAUAGAGAGCAC	3	288.85	1	0.0179376	Output/DS_TL/cleaveLand_result/t_plot/nta-miR156g_L+1_XM_016588077.1_1973_TPlot.pdf
XM_016640008.1:1758	nta-miR156a	XM_016640008.1	107814567	LOC107814567	squamosa promoter-binding-like protein 6 [Nicotiana tabacum]	GO:0003677(DNA binding);GO:0003700(transcription factor activity, sequence-specific DNA binding);GO:0005634(nucleus);GO:0006351(transcription, DNA-templated);GO:0006355(regulation of transcription, DNA-templated);GO:0010468(regulation of gene expression);GO:0042742(defense response to bacterium);GO:0046872(metal ion binding)	NA	1767	1758	0.846774	2	.(((((.(((((((((((((&))))))))))))).))))).	AUGCUCUCUCUCUUCUGUCA&UGACAGAAGAGAGUGAGCAC	24	2310.8	0	0.0180787	Output/DS_TL/cleaveLand_result/t_plot/nta-miR156a_XM_016640008.1_1758_TPlot.pdf
XM_016610544.1:825	nta-MIR156c-p3_1ss22TC	XM_016610544.1	MSTRG.18589	LOC107788815	PREDICTED: ATG8-interacting protein 1 isoform X2 [Nicotiana tabacum]	GO:0005515(protein binding);GO:0005622(intracellular);GO:0005623(cell);GO:0005634(nucleus);GO:0005783(endoplasmic reticulum);GO:0005789(endoplasmic reticulum membrane);GO:0005829(cytosol);GO:0009570(chloroplast stroma);GO:0016021(integral component of membrane);GO:0031969(chloroplast membrane);GO:0043231(intracellular membrane-bounded organelle);GO:0071211(protein targeting to vacuole involved in…	NA	833	825	0.692135	6.5	.((((((((((((.(((((-(((&))).))))).)))))))))))).	CGUGGCAGCAAGAAAGGUG-GCA&UGCUCACUUCUCUUGCUGUCACC	3	288.85	1	0.0219692	Output/DS_TL/cleaveLand_result/t_plot/nta-MIR156c-p3_1ss22TC_XM_016610544.1_825_TPlot.pdf
XM_016584434.1:739	nta-MIR479a-p3	XM_016584434.1	107765749	LOC107765749	PREDICTED: nodulation-signaling pathway 2 protein-like [Nicotiana tabacum]	GO:0003700(transcription factor activity, sequence-specific DNA binding);GO:0005634(nucleus);GO:0006355(regulation of transcription, DNA-templated);GO:0043565(sequence-specific DNA binding)	04075(Plant hormone signal transduction)	748	739	0.975	1	(((((((((((((((((((((&)))))))))))))))))))))	GAGUGAUAUUGGUUCGGCUCA&UGAGCCGGACCAAUAUCACUC	1	96.2835	4	0.0219914	Output/DS_TL/cleaveLand_result/t_plot/nta-MIR479a-p3_XM_016584434.1_739_TPlot.pdf
XM_016594191.1:396	nta-miR6148b_R+2	XM_016594191.1	MSTRG.14084	LOC107774603	PREDICTED: DAG protein, chloroplastic-like [Nicotiana tabacum]	GO:0005515(protein binding);GO:0009507(chloroplast);GO:0009570(chloroplast stroma);GO:0009941(chloroplast envelope);GO:1900865(chloroplast RNA modification)	00561(Glycerolipid metabolism);00564(Glycerophospholipid metabolism)	405	396	0.833819	6.5	...(((((((((((((((((((.&.)))))))))))))))))))...	CUAGAGAACAGAUGAUUGACACU&UGUGUUAAUCGUUUGUUCUCAAC	1	96.2835	4	0.0219914	Output/DS_TL/cleaveLand_result/t_plot/nta-miR6148b_R+2_XM_016594191.1_396_TPlot.pdf
XM_016604664.1:320	nta-MIR6163-p3	XM_016604664.1	MSTRG.16980	LOC107783659	PREDICTED: rRNA biogenesis protein RRP5-like [Nicotiana tomentosiformis]	GO:0003723(RNA binding);GO:0005730(nucleolus);GO:0032040(small-subunit processome)	NA	330	320	0.833787	6.5	((((((((((((((((.((((..&..))))-))))))))))))))))	GGCAGUGCUUCCAAGUCUGAUAA&UGAUUA-ACUUGGAAGUACUGCC	1	96.2835	4	0.0219914	Output/DS_TL/cleaveLand_result/t_plot/nta-MIR6163-p3_XM_016604664.1_320_TPlot.pdf
XM_016609233.1:3154	nta-miR169t_R-1_1ss8GT	XM_016609233.1	MSTRG.18214	LOC107787638	PREDICTED: ABC transporter C family member 14-like [Nicotiana tabacum]	GO:0000325(plant-type vacuole);GO:0005524(ATP binding);GO:0005773(vacuole);GO:0005774(vacuolar membrane);GO:0005794(Golgi apparatus);GO:0005886(plasma membrane);GO:0008559(xenobiotic-transporting ATPase activity);GO:0016021(integral component of membrane);GO:0042626(ATPase activity, coupled to transmembrane movement of substances);GO:0042626(ATPase activity, coupled to transmembrane movement of s…	02010(ABC transporters);02010(ABC transporters)	3163	3154	0.827195	4.5	.(((((((.(((((((((((&))))))))))).))))))).	UGGCAAGUGAUUAUUGGCUG&UAGCCAAUGAUGACUUGCCU	1	96.2835	4	0.0219914	Output/DS_TL/cleaveLand_result/t_plot/nta-miR169t_R-1_1ss8GT_XM_016609233.1_3154_TPlot.pdf
XM_016628298.1:1296	nta-miR1446	XM_016628298.1	MSTRG.23463	LOC107804413	PREDICTED: heavy metal-associated isoprenylated plant protein 3-like [Nicotiana tabacum]	GO:0005737(cytoplasm);GO:0030001(metal ion transport);GO:0046914(transition metal ion binding);GO:0046916(cellular transition metal ion homeostasis)	NA	1305	1296	0.862233	2.5	..((((((((((((((((((((&))))))))))))))))))))..	UCUCAUUGAGGGAGAGAGUUCA&UGAACUCUCUCCCUCAAUGGCU	1	96.2835	4	0.0219914	Output/DS_TL/cleaveLand_result/t_plot/nta-miR1446_XM_016628298.1_1296_TPlot.pdf
XM_016659425.1:695	nta-miR482d	XM_016659425.1	107831644	LOC107831644	PREDICTED: disease resistance protein TAO1-like [Nicotiana tabacum]	GO:0005737(cytoplasm);GO:0006952(defense response);GO:0007165(signal transduction);GO:0009506(plasmodesma);GO:0009507(chloroplast);GO:0016021(integral component of membrane);GO:0043531(ADP binding)	03040(Spliceosome);04141(Protein processing in endoplasmic reticulum);04144(Endocytosis)	704	695	0.828092	3	.(((.(((((((((((((((((&))))))))))))))))).))).	AUGGAAUGGGGGGAGUUGGGAA&UUCCCGACUCCCCCCAUACCAC	1	96.2835	4	0.0219914	Output/DS_TL/cleaveLand_result/t_plot/nta-miR482d_XM_016659425.1_695_TPlot.pdf
XR_001642430.1:527	nta-miR6151f	XR_001642430.1	MSTRG.9482	LOC107760575	PREDICTED: uncharacterized protein LOC104117374 [Nicotiana tomentosiformis]	GO:0003674(molecular_function);GO:0008150(biological_process);GO:0008150(biological_process)	NA	537	527	0.715365	6	((((-(((((((((((..(((((&)))))-.))))))))))).))))	UCGG-CCAAUGCCUCAGAACUCA&UGAGU-GUGAGGCAUUGGAUUGA	5	481.417	1	0.0239788	Output/DS_TL/cleaveLand_result/t_plot/nta-miR6151f_XR_001642430.1_527_TPlot.pdf
XM_016608290.1:1738	nta-miR319a_R-1	XM_016608290.1	MSTRG.17943	LOC107786783	PREDICTED: transcription factor TCP4-like [Nicotiana tomentosiformis]	GO:0003677(DNA binding);GO:0003700(transcription factor activity, sequence-specific DNA binding);GO:0005515(protein binding);GO:0005634(nucleus);GO:0006351(transcription, DNA-templated);GO:0006355(regulation of transcription, DNA-templated);GO:0009793(embryo development ending in seed dormancy);GO:0009965(leaf morphogenesis);GO:0030154(cell differentiation);GO:0045962(positive regulation of devel…	NA	1747	1738	0.742788	4	.((((..(((((((((((((&)))))))))))))..)))).	AGGGGACCCCUUCAGUCCAG&UUGGACUGAAGGGAGCUCCC	6	577.701	0	0.0243147	Output/DS_TL/cleaveLand_result/t_plot/nta-miR319a_R-1_XM_016608290.1_1738_TPlot.pdf
XM_016608291.1:1741	nta-miR319a_R-1	XM_016608291.1	MSTRG.17943	LOC107786783	PREDICTED: transcription factor TCP4-like [Nicotiana tomentosiformis]	GO:0003677(DNA binding);GO:0003700(transcription factor activity, sequence-specific DNA binding);GO:0005515(protein binding);GO:0005634(nucleus);GO:0006351(transcription, DNA-templated);GO:0006355(regulation of transcription, DNA-templated);GO:0009793(embryo development ending in seed dormancy);GO:0009965(leaf morphogenesis);GO:0030154(cell differentiation);GO:0045962(positive regulation of devel…	NA	1750	1741	0.742788	4	.((((..(((((((((((((&)))))))))))))..)))).	AGGGGACCCCUUCAGUCCAG&UUGGACUGAAGGGAGCUCCC	7	673.984	0	0.0248796	Output/DS_TL/cleaveLand_result/t_plot/nta-miR319a_R-1_XM_016608291.1_1741_TPlot.pdf
XM_016597768.1:185	nta-miR319a_R-1	XM_016597768.1	MSTRG.15043	LOC107777682	PREDICTED: transcription factor PCF7-like [Nicotiana attenuata];PREDICTED: transcription factor TCP4-like [Nicotiana tabacum]	GO:0003677(DNA binding);GO:0003700(transcription factor activity, sequence-specific DNA binding);GO:0005515(protein binding);GO:0005634(nucleus);GO:0006351(transcription, DNA-templated);GO:0006355(regulation of transcription, DNA-templated);GO:0009793(embryo development ending in seed dormancy);GO:0009965(leaf morphogenesis);GO:0030154(cell differentiation);GO:0045962(positive regulation of devel…	NA	194	185	0.742788	4	.((((..(((((((((((((&)))))))))))))..)))).	AGGGGACCCCUUCAGUCCAG&UUGGACUGAAGGGAGCUCCC	3	288.85	0	0.0251619	Output/DS_TL/cleaveLand_result/t_plot/nta-miR319a_R-1_XM_016597768.1_185_TPlot.pdf
MSTRG.62.1:232	nta-miR390b	MSTRG.62.1	MSTRG.62	.	0	NA	NA	241	232	0.900677	1.5	((((.((((((((((((((((&)))))))))))))))).))))	GGUGGUAUCCCUCCUGAGCUU&AAGCUCAGGAGGGAUAGCGCC	9	866.551	2	0.0252645	Output/DS_TL/cleaveLand_result/t_plot/nta-miR390b_MSTRG.62.1_232_TPlot.pdf
XM_016582023.1:1237	nta-miR171c	XM_016582023.1	107763537	LOC107763537	PREDICTED: scarecrow-like protein 6 isoform X1 [Nicotiana tabacum]	GO:0003700(transcription factor activity, sequence-specific DNA binding);GO:0005634(nucleus);GO:0006355(regulation of transcription, DNA-templated);GO:0030154(cell differentiation);GO:0043565(sequence-specific DNA binding);GO:0043565(sequence-specific DNA binding)	04075(Plant hormone signal transduction);04075(Plant hormone signal transduction)	1246	1237	1	1	(((((((((((((((((((((&)))))))))))))))))))))	GAUAUUGGCGCGGCUCAAUCA&UGAUUGAGCCGUGCCAAUAUC	3	288.85	2	0.0252645	Output/DS_TL/cleaveLand_result/t_plot/nta-miR171c_XM_016582023.1_1237_TPlot.pdf
XM_016602755.1:585	nta-miR6145d	XM_016602755.1	MSTRG.16431	LOC107781937	PREDICTED: external alternative NAD(P)H-ubiquinone oxidoreductase B2, mitochondrial-like [Nicotiana tabacum]	GO:0003954(NADH dehydrogenase activity);GO:0005509(calcium ion binding);GO:0005739(mitochondrion);GO:0005743(mitochondrial inner membrane);GO:0005777(peroxisome)	00190(Oxidative phosphorylation)	594	585	0.846386	7	(((.((((((((((((((((..&..))))))))))))))))-)))	GCCAAGUGUUACGUGUGGCACA&AUUGUUACAUGUAACACU-GGC	2	192.567	2	0.0252645	Output/DS_TL/cleaveLand_result/t_plot/nta-miR6145d_XM_016602755.1_585_TPlot.pdf
XM_016630899.1:625	nta-miR396b	XM_016630899.1	107806689	LOC107806689	PREDICTED: uncharacterized protein LOC104087137 isoform X2 [Nicotiana tomentosiformis]	GO:0003674(molecular_function);GO:0005739(mitochondrion);GO:0008150(biological_process);GO:0008150(biological_process)	NA	634	625	0.793413	6	...((((((((((((((((..&..))))))))))))))))...	GUUUUCAAGAAAGCUGUGGCA&UUCCACAGCUUUCUUGAACUU	5	481.417	0	0.0260085	Output/DS_TL/cleaveLand_result/t_plot/nta-miR396b_XM_016630899.1_625_TPlot.pdf
XM_016630900.1:625	nta-miR396b	XM_016630900.1	107806689	LOC107806689	PREDICTED: uncharacterized protein LOC104087137 isoform X2 [Nicotiana tomentosiformis]	GO:0003674(molecular_function);GO:0005739(mitochondrion);GO:0008150(biological_process);GO:0008150(biological_process)	NA	634	625	0.793413	6	...((((((((((((((((..&..))))))))))))))))...	GUUUUCAAGAAAGCUGUGGCA&UUCCACAGCUUUCUUGAACUU	6	577.701	0	0.0265724	Output/DS_TL/cleaveLand_result/t_plot/nta-miR396b_XM_016630900.1_625_TPlot.pdf
XM_016599569.1:740	nta-MIR6153-p3	XM_016599569.1	107779198	LOC107779198	PREDICTED: protein YIF1B isoform X1 [Solanum lycopersicum]	GO:0003674(molecular_function);GO:0008150(biological_process);GO:0016021(integral component of membrane);GO:0016021(integral component of membrane)	NA	749	740	0.745645	7	...((((((((((.(((((((&))))))).))))))))))...	AUAUGGAGCCAUUCUUACUAC&GUAGUGAAAAUGGUUCUAAAU	2	192.567	1	0.0267854	Output/DS_TL/cleaveLand_result/t_plot/nta-MIR6153-p3_XM_016599569.1_740_TPlot.pdf
XM_016651467.1:634	nta-miR396b	XM_016651467.1	107824668	LOC107824668	PREDICTED: uncharacterized protein LOC107824668 isoform X1 [Nicotiana tabacum]	GO:0003674(molecular_function);GO:0005739(mitochondrion);GO:0008150(biological_process);GO:0008150(biological_process)	NA	643	634	0.793413	6	...((((((((((((((((..&..))))))))))))))))...	GUUUUCAAGAAAGCUGUGGCA&UUCCACAGCUUUCUUGAACUU	3	288.85	0	0.0268543	Output/DS_TL/cleaveLand_result/t_plot/nta-miR396b_XM_016651467.1_634_TPlot.pdf
XM_016660176.1:1120	nta-miR169a_1ss7AG	XM_016660176.1	MSTRG.8795	LOC107832352	PREDICTED: nuclear transcription factor Y subunit A-1-like [Nicotiana tabacum]	GO:0003677(DNA binding);GO:0003700(transcription factor activity, sequence-specific DNA binding);GO:0005634(nucleus);GO:0006351(transcription, DNA-templated);GO:0006355(regulation of transcription, DNA-templated);GO:0009793(embryo development ending in seed dormancy);GO:0010262(somatic embryogenesis);GO:0016602(CCAAT-binding factor complex);GO:0048316(seed development);GO:0048510(regulation of ti…	00970(Aminoacyl-tRNA biosynthesis);00970(Aminoacyl-tRNA biosynthesis)	1129	1120	0.671982	5	.((((((.((((((((((((.&.)))))))))))).)))))).	GCGGCAAAUCAUUCUUGGCUU&CAGCCAGGGAUGACUUGCCGA	20	1925.67	0	0.0268543	Output/DS_TL/cleaveLand_result/t_plot/nta-miR169a_1ss7AG_XM_016660176.1_1120_TPlot.pdf
XM_016651468.1:634	nta-miR396b	XM_016651468.1	107824668	LOC107824668	PREDICTED: uncharacterized protein LOC107824668 isoform X1 [Nicotiana tabacum]	GO:0003674(molecular_function);GO:0005739(mitochondrion);GO:0008150(biological_process);GO:0008150(biological_process)	NA	643	634	0.793413	6	...((((((((((((((((..&..))))))))))))))))...	GUUUUCAAGAAAGCUGUGGCA&UUCCACAGCUUUCUUGAACUU	3	288.85	0	0.0271361	Output/DS_TL/cleaveLand_result/t_plot/nta-miR396b_XM_016651468.1_634_TPlot.pdf
XM_016660175.1:1235	nta-miR169a_1ss7AG	XM_016660175.1	MSTRG.8795	LOC107832352	PREDICTED: nuclear transcription factor Y subunit A-1-like [Nicotiana tabacum]	GO:0003677(DNA binding);GO:0003700(transcription factor activity, sequence-specific DNA binding);GO:0005634(nucleus);GO:0006351(transcription, DNA-templated);GO:0006355(regulation of transcription, DNA-templated);GO:0009793(embryo development ending in seed dormancy);GO:0010262(somatic embryogenesis);GO:0016602(CCAAT-binding factor complex);GO:0048316(seed development);GO:0048510(regulation of ti…	00970(Aminoacyl-tRNA biosynthesis);00970(Aminoacyl-tRNA biosynthesis)	1244	1235	0.671982	5	.((((((.((((((((((((.&.)))))))))))).)))))).	GCGGCAAAUCAUUCUUGGCUU&CAGCCAGGGAUGACUUGCCGA	30	2888.5	0	0.0274177	Output/DS_TL/cleaveLand_result/t_plot/nta-miR169a_1ss7AG_XM_016660175.1_1235_TPlot.pdf
XM_016614321.1:1226	nta-miR169a_1ss7AG	XM_016614321.1	MSTRG.19622	LOC107792129	PREDICTED: nuclear transcription factor Y subunit A-1-like [Nicotiana sylvestris]	GO:0003677(DNA binding);GO:0003700(transcription factor activity, sequence-specific DNA binding);GO:0005634(nucleus);GO:0006351(transcription, DNA-templated);GO:0006355(regulation of transcription, DNA-templated);GO:0009793(embryo development ending in seed dormancy);GO:0010262(somatic embryogenesis);GO:0016602(CCAAT-binding factor complex);GO:0048316(seed development);GO:0048510(regulation of ti…	00970(Aminoacyl-tRNA biosynthesis)	1235	1226	0.671982	5	.((((((.((((((((((((.&.)))))))))))).)))))).	GCGGCAAAUCAUUCUUGGCUU&CAGCCAGGGAUGACUUGCCGA	26	2503.37	0	0.0276994	Output/DS_TL/cleaveLand_result/t_plot/nta-miR169a_1ss7AG_XM_016614321.1_1226_TPlot.pdf
XM_016600847.1:598	nta-miR6025e	XM_016600847.1	107780321	LOC107780321	PREDICTED: putative late blight resistance protein homolog R1A-10 [Nicotiana tabacum]	GO:0005524(ATP binding);GO:0005886(plasma membrane);GO:0006952(defense response);GO:0043531(ADP binding)	04626(Plant-pathogen interaction)	607	598	0.696884	6	((.(((((((((((.(((((.(&).))))).))))))))))).))	GAAGUCAUCUCUAUUGUUGGGA&UGCCAAUUAUAGAGAUGACAUC	2	192.567	1	0.0283855	Output/DS_TL/cleaveLand_result/t_plot/nta-miR6025e_XM_016600847.1_598_TPlot.pdf
XM_016589684.1:355	nta-MIR160b-p3	XM_016589684.1	MSTRG.12546	LOC107770380	PREDICTED: clavaminate synthase-like protein At3g21360 [Nicotiana sylvestris]	GO:0005634(nucleus);GO:0016491(oxidoreductase activity);GO:0046872(metal ion binding);GO:0055114(oxidation-reduction process)	NA	364	355	0.664083	7	((((.(((((--((((((((((&))))))))))..)))))-))))	GGGUGGUGCU--GCUCCUCGUA&UAUGAGGAGCCAAGCAU-AUCC	8	770.268	0	0.0285437	Output/DS_TL/cleaveLand_result/t_plot/nta-MIR160b-p3_XM_016589684.1_355_TPlot.pdf
XM_016636821.1:313	nta-miR6149a	XM_016636821.1	107811826	LOC107811826	PREDICTED: putative F-box protein At2g19630 isoform X2 [Nicotiana tabacum]	NA	NA	322	313	0.666667	5	..((((.(((((((((.((((&)))).))))))))).))))..	UGCGAUCCAGGUGCGUUUCAA&UUGAUACGCACCUGAAUCGGC	4	385.134	1	0.0303819	Output/DS_TL/cleaveLand_result/t_plot/nta-miR6149a_XM_016636821.1_313_TPlot.pdf
XM_016609595.1:189	nta-MIR172a-p5	XM_016609595.1	107787966	LOC107787966	PREDICTED: calmodulin-like protein 1 [Nicotiana tabacum]	GO:0005509(calcium ion binding)	04626(Plant-pathogen interaction)	198	189	0.728291	7	..((((((((((((((.(((.&.))).))))))))))))))..	CAGAAUCUUGAAGGUGGUGUG&UGCAGCAUCUUCAAGAUUCAC	5	481.417	0	0.0307917	Output/DS_TL/cleaveLand_result/t_plot/nta-MIR172a-p5_XM_016609595.1_189_TPlot.pdf
XM_016628906.1:77	nta-miR6162_L+1R-1	XM_016628906.1	MSTRG.23627	LOC107804952	PREDICTED: uncharacterized protein LOC104118307 [Nicotiana tomentosiformis]	GO:0004801(sedoheptulose-7-phosphate:D-glyceraldehyde-3-phosphate glyceronetransferase activity);GO:0005739(mitochondrion);GO:0005829(cytosol);GO:0005975(carbohydrate metabolic process);GO:0006098(pentose-phosphate shunt);GO:0009507(chloroplast);GO:0009536(plastid);GO:0009570(chloroplast stroma);GO:0009809(lignin biosynthetic process);GO:0033587(shikimate biosynthetic process);GO:0046686(response…	01200(Carbon metabolism);01230(Biosynthesis of amino acids);00030(Pentose phosphate pathway)	84	77	0.682779	6	..((((((((((((--(((((&)))))..))))))))))))..	AAAAUGGCUACCAU--UUCUA&UAGAAAAAUGGUAGCCAUUGG	6	577.701	1	0.0323742	Output/DS_TL/cleaveLand_result/t_plot/nta-miR6162_L+1R-1_XM_016628906.1_77_TPlot.pdf
XM_016654301.1:471	nta-miR396b	XM_016654301.1	MSTRG.7157	LOC107827209	PREDICTED: cyclic phosphodiesterase-like isoform X1 [Nicotiana sylvestris]	GO:0004112(cyclic-nucleotide phosphodiesterase activity);GO:0005737(cytoplasm);GO:0006388(tRNA splicing, via endonucleolytic cleavage and ligation)	NA	482	471	0.775449	5.5	((((((((((((((.((((.((.&.))-))))-))))))))))))))	AGGUUCAAGAAAGCUUGUGAGAU&UUC-CACA-GCUUUCUUGAACUU	13	1251.68	0	0.0369469	Output/DS_TL/cleaveLand_result/t_plot/nta-miR396b_XM_016654301.1_471_TPlot.pdf
XM_016599464.1:231	nta-miR6149a	XM_016599464.1	107779123	LOC107779123	PREDICTED: F-box/kelch-repeat protein At3g23880-like [Nicotiana tabacum]	GO:0004842(ubiquitin-protein transferase activity);GO:0019005(SCF ubiquitin ligase complex);GO:0031146(SCF-dependent proteasomal ubiquitin-dependent protein catabolic process);GO:0031146(SCF-dependent proteasomal ubiquitin-dependent protein catabolic process)	00970(Aminoacyl-tRNA biosynthesis);00970(Aminoacyl-tRNA biosynthesis)	240	231	0.838462	3	..(((((((((((((((((((&)))))))))))))))))))..	UACGAUUCAGGUGUGUAUCAA&UUGAUACGCACCUGAAUCGGC	2	192.567	2	0.0376563	Output/DS_TL/cleaveLand_result/t_plot/nta-miR6149a_XM_016599464.1_231_TPlot.pdf
XM_016605700.1:1479	nta-MIR479b-p3	XM_016605700.1	MSTRG.17279	LOC107784554	PREDICTED: scopoletin glucosyltransferase-like [Nicotiana tabacum]	GO:0042802(identical protein binding);GO:0050275(scopoletin glucosyltransferase activity)	00906(Carotenoid biosynthesis)	1488	1479	0.843085	3.5	(((.((((((((((((((((((&))))))))))))))))))-)))	GGGUUGGUGUUGGUUCGGUUCA&UGAGCCGAACCAAUAUCA-CUC	4	385.134	2	0.0376563	Output/DS_TL/cleaveLand_result/t_plot/nta-MIR479b-p3_XM_016605700.1_1479_TPlot.pdf
XM_016611621.1:270	nta-miR6020a-5p	XM_016611621.1	#N/A	#N/A	#N/A	#N/A	#N/A	279	270	1	1	(((((((((((((((((((((&)))))))))))))))))))))	GAAGAUACUCGGAAAACAUUU&AAAUGUUUUUCGAGUAUCUUC	2	192.567	2	0.0376563	Output/DS_TL/cleaveLand_result/t_plot/nta-miR6020a-5p_XM_016611621.1_270_TPlot.pdf
XM_016618962.1:784	nta-miR6151g	XM_016618962.1	MSTRG.20934	LOC107796219	PREDICTED: uncharacterized protein LOC107796219 isoform X2 [Nicotiana tabacum]	GO:0003676(nucleic acid binding);GO:0005634(nucleus);GO:0008270(zinc ion binding);GO:0008270(zinc ion binding)	NA	793	784	0.759124	5.5	.((((((.((((((((((((((&)))))))))))))).)))))).	GCGAUCCUACGCUUCAUGCUCA&UGAGUGUGAGGCGUUGGAUUGA	15	1444.25	2	0.0376563	Output/DS_TL/cleaveLand_result/t_plot/nta-miR6151g_XM_016618962.1_784_TPlot.pdf
XM_016635528.1:1697	nta-miR171c	XM_016635528.1	107810717	LOC107810717	PREDICTED: scarecrow-like protein 22 [Nicotiana tabacum]	GO:0003700(transcription factor activity, sequence-specific DNA binding);GO:0005634(nucleus);GO:0006355(regulation of transcription, DNA-templated);GO:0010492(maintenance of shoot apical meristem identity);GO:0043565(sequence-specific DNA binding);GO:0048768(root hair cell tip growth);GO:0051301(cell division)	04075(Plant hormone signal transduction)	1706	1697	1	1	(((((((((((((((((((((&)))))))))))))))))))))	GAUAUUGGCGCGGCUCAAUCA&UGAUUGAGCCGUGCCAAUAUC	8	770.268	2	0.0376563	Output/DS_TL/cleaveLand_result/t_plot/nta-miR171c_XM_016635528.1_1697_TPlot.pdf
XM_016642792.1:578	nta-miR6145f_L+1	XM_016642792.1	107817026	LOC107817026	PREDICTED: serine/threonine-protein phosphatase 7 long form homolog, partial [Nicotiana tabacum]	GO:0005634(nucleus);GO:0008150(biological_process);GO:0008483(transaminase activity)	00520(Amino sugar and nucleotide sugar metabolism)	587	578	0.787356	7	((((.(((((((((((((((...&...)))))))))))))))-))))	GCUAGGUGCUAUAUGUUAUGGAU&UAUCGUAACAUAUAGCAC-UAGC	3	288.85	2	0.0376563	Output/DS_TL/cleaveLand_result/t_plot/nta-miR6145f_L+1_XM_016642792.1_578_TPlot.pdf
XM_016643897.1:322	nta-miR827	XM_016643897.1	MSTRG.4187	LOC107817998	PREDICTED: SPX domain-containing membrane protein At4g22990-like isoform X1 [Nicotiana sylvestris]	GO:0005622(intracellular);GO:0005623(cell);GO:0006817(phosphate ion transport);GO:0009705(plant-type vacuole membrane);GO:0016021(integral component of membrane);GO:0055085(transmembrane transport)	NA	331	322	0.877551	3	((((((((((((.((((((((&)))))))).))))))))))))	UGUUUGUUGGUGCUCAUCUAA&UUAGAUGAACAUCAACAAACA	4	385.134	2	0.0376563	Output/DS_TL/cleaveLand_result/t_plot/nta-miR827_XM_016643897.1_322_TPlot.pdf
XM_016613884.1:963	nta-MIR6161c-p3_1ss7AG	XM_016613884.1	MSTRG.19499	LOC107791752	PREDICTED: 2-isopropylmalate synthase B [Nicotiana sylvestris]	GO:0003852(2-isopropylmalate synthase activity);GO:0009098(leucine biosynthetic process);GO:0009507(chloroplast);GO:0009941(chloroplast envelope);GO:0016829(lyase activity)	01210(2-Oxocarboxylic acid metabolism);01230(Biosynthesis of amino acids);00620(Pyruvate metabolism);00290(Valine, leucine and isoleucine biosynthesis)	972	963	0.764835	6.5	.(((((((---(((((((((((((&)))))))))))))...))))))).	AGCUGGAG---CAUGCGCAGGUGC&GCACCUGUGUAUGAACUUCCAGCA	2	192.567	3	0.0386613	Output/DS_TL/cleaveLand_result/t_plot/nta-MIR6161c-p3_1ss7AG_XM_016613884.1_963_TPlot.pdf
XM_016613337.1:1569	nta-miR479b	XM_016613337.1	107791298	LOC107791298	0	NA	NA	1578	1569	0.784703	6.5	....((((((((((((((((((&))))))))))))))))))....	AUUAAGCCAGACAGGUAUCACG&CGUGAUAUUUGUUUGGCUCAUC	1	96.2835	4	0.0434992	Output/DS_TL/cleaveLand_result/t_plot/nta-miR479b_XM_016613337.1_1569_TPlot.pdf
XM_016628138.1:1829	nta-MIR398-p5	XM_016628138.1	107804274	LOC107804274	PREDICTED: receptor-like serine/threonine-protein kinase NCRK isoform X1 [Nicotiana tabacum]	GO:0004674(protein serine/threonine kinase activity);GO:0005524(ATP binding);GO:0005768(endosome);GO:0005886(plasma membrane);GO:0006468(protein phosphorylation);GO:0010008(endosome membrane);GO:0010089(xylem development);GO:0012505(endomembrane system);GO:0016021(integral component of membrane);GO:0016301(kinase activity);GO:0031902(late endosome membrane);GO:0051020(GTPase binding);GO:0051020(G…	04626(Plant-pathogen interaction);04626(Plant-pathogen interaction)	1839	1829	0.776942	6	((((((((((((((.(((((..&..)))))-))))))))))))))	CGUGUGGUCUCAGAGUUGCCAG&GGGGCAA-UCUGAGAUCACAUG	1	96.2835	4	0.0434992	Output/DS_TL/cleaveLand_result/t_plot/nta-MIR398-p5_XM_016628138.1_1829_TPlot.pdf
XM_016643549.1:810	nta-MIR6152a-p3	XM_016643549.1	MSTRG.4093	LOC107817685	PREDICTED: protein DGCR14 [Nicotiana sylvestris]	GO:0003674(molecular_function);GO:0005634(nucleus);GO:0008150(biological_process)	NA	819	810	0.818731	7	(((((..(((((((((((((((..&..)))))))))))))))..)))))	GGGAGGAUGUUAUGUUGAUUGAGG&AAUCAAUUAACAUAAUAGACUCCU	1	96.2835	4	0.0434992	Output/DS_TL/cleaveLand_result/t_plot/nta-MIR6152a-p3_XM_016643549.1_810_TPlot.pdf
XM_016660074.1:1560	nta-MIR6021-p3	XM_016660074.1	MSTRG.8763	LOC107832255	PREDICTED: uncharacterized protein LOC107832255 isoform X2 [Nicotiana tabacum]	GO:0003674(molecular_function);GO:0008150(biological_process);GO:0008150(biological_process)	NA	1570	1560	0.795455	7	((((((((((((((((..((((&))))-.))))))))))))))))	GGGGAGGGGUGGAUUGGGGAUG&CAUC-ACAGUUCACUCCUUCCC	1	96.2835	4	0.0434992	Output/DS_TL/cleaveLand_result/t_plot/nta-MIR6021-p3_XM_016660074.1_1560_TPlot.pdf
XM_016579417.1:95	nta-miR6019a	XM_016579417.1	107761218	LOC107761218	PREDICTED: LOW QUALITY PROTEIN: uncharacterized protein LOC107761218, partial [Nicotiana tabacum]	GO:0005515(protein binding)	03040(Spliceosome);04141(Protein processing in endoplasmic reticulum);04144(Endocytosis)	104	95	1	2	((((((((((((((((((((((&))))))))))))))))))))))	AAACAUUUACAGGUCGCCUGUA&UACAGGUGACUUGUAAAUGUUU	10	962.835	2	0.0498907	Output/DS_TL/cleaveLand_result/t_plot/nta-miR6019a_XM_016579417.1_95_TPlot.pdf
XM_016600705.1:1446	nta-miR169a_1ss7AG	XM_016600705.1	MSTRG.15841	LOC107780177	PREDICTED: nuclear transcription factor Y subunit A-3-like isoform X1 [Nicotiana tabacum]	GO:0003677(DNA binding);GO:0003700(transcription factor activity, sequence-specific DNA binding);GO:0005634(nucleus);GO:0006351(transcription, DNA-templated);GO:0006355(regulation of transcription, DNA-templated);GO:0016602(CCAAT-binding factor complex);GO:0016602(CCAAT-binding factor complex)	00970(Aminoacyl-tRNA biosynthesis);00970(Aminoacyl-tRNA biosynthesis)	1455	1446	0.763098	3.5	(((((((.((((((((((((.&.)))))))))))).)))))))	UCGGCAGUUCAUCCUUGGCUA&CAGCCAGGGAUGACUUGCCGA	2	192.567	2	0.0498907	Output/DS_TL/cleaveLand_result/t_plot/nta-miR169a_1ss7AG_XM_016600705.1_1446_TPlot.pdf
XM_016606945.1:2170	nta-MIR6149a-p3	XM_016606945.1	MSTRG.17583	LOC107785602	PREDICTED: heat shock protein 81-1-like [Nicotiana sylvestris]	GO:0005524(ATP binding);GO:0005739(mitochondrion);GO:0005774(vacuolar membrane);GO:0005829(cytosol);GO:0006457(protein folding);GO:0009408(response to heat);GO:0009414(response to water deprivation);GO:0009507(chloroplast);GO:0009536(plastid);GO:0009570(chloroplast stroma);GO:0009651(response to salt stress);GO:0009704(de-etiolation);GO:0009793(embryo development ending in seed dormancy);GO:00099…	04141(Protein processing in endoplasmic reticulum);04626(Plant-pathogen interaction)	2179	2170	0.759207	5.5	..((((((.(((((((((((.&.))))))))))).))))))..	GGUUGAUGAGAGCCCAAACCU&CGGUUUGGGUUCGUAUCAAAC	4	385.134	2	0.0498907	Output/DS_TL/cleaveLand_result/t_plot/nta-MIR6149a-p3_XM_016606945.1_2170_TPlot.pdf
XM_016624148.1:147	nta-miR6020a-5p	XM_016624148.1	107800887	LOC107800887	PREDICTED: TMV resistance protein N-like isoform X1 [Nicotiana sylvestris]	GO:0005515(protein binding)	03040(Spliceosome);04141(Protein processing in endoplasmic reticulum);04144(Endocytosis)	156	147	1	1	(((((((((((((((((((((&)))))))))))))))))))))	GAAGAUACUCGGAAAACAUUU&AAAUGUUUUUCGAGUAUCUUC	2	192.567	2	0.0498907	Output/DS_TL/cleaveLand_result/t_plot/nta-miR6020a-5p_XM_016624148.1_147_TPlot.pdf
XM_016624337.1:942	nta-miR6156	XM_016624337.1	107801070	LOC107801070	PREDICTED: cytochrome P450 724B1-like [Nicotiana tabacum]	GO:0004497(monooxygenase activity);GO:0007275(multicellular organism development);GO:0010268(brassinosteroid homeostasis);GO:0016125(sterol metabolic process);GO:0016132(brassinosteroid biosynthetic process)	00905(Brassinosteroid biosynthesis)	951	942	0.858108	4	.((((((((((((((((((((&)))))))))))))))))))).	CUAGAAGUAGAAUAUCUUCGA&UUGAAGAUGUUCUAUUUCUGU	2	192.567	2	0.0498907	Output/DS_TL/cleaveLand_result/t_plot/nta-miR6156_XM_016624337.1_942_TPlot.pdf
XR_001656222.1:525	nta-miR397_R+1	XR_001656222.1	107821743	LOC107821743	PREDICTED: uncharacterized protein LOC104120237 isoform X3 [Nicotiana tomentosiformis]	GO:0005737(cytoplasm);GO:0008757(S-adenosylmethionine-dependent methyltransferase activity);GO:0032259(methylation);GO:0032259(methylation)	NA	534	525	0.673854	7	(((((.(.(((((((((.(((&))).))))))))).).)))))	GGCAUGAUUGCUGCACUGGGU&AUUGAGUGCAGCGUUGAUGUC	2	192.567	0	0.0546314	Output/DS_TL/cleaveLand_result/t_plot/nta-miR397_R+1_XR_001656222.1_525_TPlot.pdf
XM_016653065.1:822	nta-miR159	XM_016653065.1	MSTRG.6795	LOC107826117	PREDICTED: uncharacterized protein LOC107826117 [Nicotiana tabacum]	GO:0003674(molecular_function);GO:0005737(cytoplasm);GO:0008150(biological_process)	NA	831	822	0.684932	5	.(((((..(((((.(((((((&))))))).)))))..))))).	AAGAGCGGCCUUCUAUCCAAA&UUUGGAUUGAAGGGAGCUCUA	76	7317.54	0	0.0559993	Output/DS_TL/cleaveLand_result/t_plot/nta-miR159_XM_016653065.1_822_TPlot.pdf
XM_016621711.1:1420	nta-miR169q_R-1_1ss7AG	XM_016621711.1	MSTRG.21651	LOC107798684	PREDICTED: dentin sialophosphoprotein-like [Nicotiana tabacum]	GO:0003674(molecular_function);GO:0005634(nucleus);GO:0005768(endosome);GO:0005794(Golgi apparatus);GO:0005802(trans-Golgi network);GO:0008150(biological_process);GO:0016021(integral component of membrane)	NA	1429	1420	0.654762	5	(((--((((.((((((((((&)))))))))).))))..)))	CGG--AGUCUUCUCUGGCUG&CAGCCAGGGAUGACUUGCCG	16	1540.54	0	0.0584565	Output/DS_TL/cleaveLand_result/t_plot/nta-miR169q_R-1_1ss7AG_XM_016621711.1_1420_TPlot.pdf
XM_016624857.1:959	nta-MIR166b-p5	XM_016624857.1	MSTRG.22553	LOC107801519	RecName: Full=S-adenosylmethionine decarboxylase proenzyme; Short=AdoMetDC; Short=SAMDC; Contains: RecName: Full=S-adenosylmethionine decarboxylase alpha chain; Contains: RecName: Full=S-adenosylmethionine decarboxylase beta chain; Flags: Precursor	GO:0004014(adenosylmethionine decarboxylase activity);GO:0005829(cytosol);GO:0006597(spermine biosynthetic process);GO:0008295(spermidine biosynthetic process)	00270(Cysteine and methionine metabolism);00330(Arginine and proline metabolism)	967	959	0.726804	5.5	((((((((((((((((-((((&)))).))))))))))))))))	GUUUCGAGCCAGAUGA-GUUC&GAAUGUUGUCUGGCUCGAAGC	2	192.567	3	0.0600786	Output/DS_TL/cleaveLand_result/t_plot/nta-MIR166b-p5_XM_016624857.1_959_TPlot.pdf
MSTRG.20934.1:798	nta-miR6151g	MSTRG.20934.1	MSTRG.20934	LOC107796219	PREDICTED: uncharacterized protein LOC107796219 isoform X2 [Nicotiana tabacum]	GO:0003676(nucleic acid binding);GO:0005634(nucleus);GO:0008270(zinc ion binding);GO:0008270(zinc ion binding)	NA	807	798	0.759124	5.5	.((((((.((((((((((((((&)))))))))))))).)))))).	GCGAUCCUACGCUUCAUGCUCA&UGAGUGUGAGGCGUUGGAUUGA	13	1251.68	2	0.0619694	Output/DS_TL/cleaveLand_result/t_plot/nta-miR6151g_MSTRG.20934.1_798_TPlot.pdf
XM_016625781.1:1721	nta-miR171c	XM_016625781.1	#N/A	#N/A	#N/A	#N/A	#N/A	1730	1721	1	1	(((((((((((((((((((((&)))))))))))))))))))))	GAUAUUGGCGCGGCUCAAUCA&UGAUUGAGCCGUGCCAAUAUC	9	866.551	2	0.0619694	Output/DS_TL/cleaveLand_result/t_plot/nta-miR171c_XM_016625781.1_1721_TPlot.pdf
XR_001654688.1:294	nta-MIR479a-p3	XR_001654688.1	107815058	LOC107815058	0	NA	NA	304	294	0.765	7	((((((((((((.(((((((..&..)))))))-))))))))))))	GAGUGGUGUUGGAUCCGGUUAU&UGAGCCGGA-CCAAUAUCACUC	2	192.567	2	0.0619694	Output/DS_TL/cleaveLand_result/t_plot/nta-MIR479a-p3_XR_001654688.1_294_TPlot.pdf
XM_016601974.1:2097	nta-MIR156j-p3	XM_016601974.1	107781288	LOC107781288	PREDICTED: uncharacterized protein LOC107781288 isoform X2 [Nicotiana tabacum]	GO:0004519(endonuclease activity);GO:0005634(nucleus);GO:0005777(peroxisome);GO:0010468(regulation of gene expression);GO:0010468(regulation of gene expression)	NA	2105	2097	0.713911	6	(((((((..(((((((-((((&)))).)))))))..)))))))	GAUGACACUGGCGUAG-GAGC&GCUCUCUAUGCUUCUGUCAUC	3	288.85	1	0.0644703	Output/DS_TL/cleaveLand_result/t_plot/nta-MIR156j-p3_XM_016601974.1_2097_TPlot.pdf
XM_016600436.1:588	nta-MIR167e-p3	XM_016600436.1	MSTRG.15760	LOC107779933	PREDICTED: photosystem I reaction center subunit II, chloroplastic-like [Nicotiana sylvestris]	GO:0005515(protein binding)	00195(Photosynthesis)	598	588	0.815718	5.5	(((((((((((((.(((((..&..)))))-)))))))))))))	GGUGGUGCUGCUAUCAUGAGA&GAUCAUG-UAGCAGCAUCACC	1	96.2835	4	0.064534	Output/DS_TL/cleaveLand_result/t_plot/nta-MIR167e-p3_XM_016600436.1_588_TPlot.pdf
XM_016605062.1:795	nta-miR164c	XM_016605062.1	107784013	LOC107784013	PREDICTED: NAC domain-containing protein 21/22-like isoform X2 [Nicotiana tomentosiformis]	GO:0003677(DNA binding);GO:0003700(transcription factor activity, sequence-specific DNA binding);GO:0005634(nucleus);GO:0006351(transcription, DNA-templated);GO:0006355(regulation of transcription, DNA-templated);GO:0007275(multicellular organism development);GO:0009734(auxin-activated signaling pathway);GO:0010072(primary shoot apical meristem specification);GO:0048527(lateral root development);…	03018(RNA degradation);03018(RNA degradation)	804	795	0.927739	1	((((.((((((((((((((((&)))))))))))))))).))))	AGCAAGUGCCCUGCUUCUCCA&UGGAGAAGCAGGGCACAUGCU	1	96.2835	4	0.064534	Output/DS_TL/cleaveLand_result/t_plot/nta-miR164c_XM_016605062.1_795_TPlot.pdf
XM_016606697.1:1107	nta-miR396b	XM_016606697.1	MSTRG.17516	LOC107785397	PREDICTED: BOI-related E3 ubiquitin-protein ligase 1-like isoform X1 [Nicotiana tabacum]	GO:0004842(ubiquitin-protein transferase activity);GO:0005634(nucleus);GO:0005737(cytoplasm);GO:0008270(zinc ion binding);GO:0016567(protein ubiquitination);GO:0031347(regulation of defense response);GO:0031347(regulation of defense response)	NA	1116	1107	0.883234	4.5	((((((((((((((((.(((.&.))).))))))))))))))))	AAGUUCAGGAAGGCUGCGGAG&UUCCACAGCUUUCUUGAACUU	1	96.2835	4	0.064534	Output/DS_TL/cleaveLand_result/t_plot/nta-miR396b_XM_016606697.1_1107_TPlot.pdf
XM_016623136.1:807	nta-MIR6152a-p3	XM_016623136.1	MSTRG.22065	LOC107799995	PREDICTED: protein DGCR14-like [Nicotiana tabacum]	GO:0003674(molecular_function);GO:0005634(nucleus);GO:0008150(biological_process)	NA	816	807	0.818731	6.5	(((((..(((((((((((((((..&..)))))))))))))))..)))))	AGGAGGAUGUUAUGUUGAUUGAGG&AAUCAAUUAACAUAAUAGACUCCU	1	96.2835	4	0.064534	Output/DS_TL/cleaveLand_result/t_plot/nta-MIR6152a-p3_XM_016623136.1_807_TPlot.pdf
XM_016640486.1:928	nta-MIR6025c-p5	XM_016640486.1	107814984	LOC107814984	PREDICTED: ELMO domain-containing protein A isoform X1 [Nicotiana tomentosiformis]	GO:0003674(molecular_function);GO:0005737(cytoplasm);GO:0005737(cytoplasm)	NA	937	928	0.650746	6	((((((((((-((((((((..&..)))))))).))))))))))	AUGAUUGAGA-UACAUCCAAU&CCUGGAUGUAAUCUCAAUUGU	2	192.567	0	0.0684911	Output/DS_TL/cleaveLand_result/t_plot/nta-MIR6025c-p5_XM_016640486.1_928_TPlot.pdf
MSTRG.1422.2:180	nta-MIR6161b-p5_1ss20TC	MSTRG.1422.2	MSTRG.1422	LOC107775135	PREDICTED: photosystem I reaction center subunit VI-2, chloroplastic-like [Nicotiana sylvestris]	GO:0003674(molecular_function);GO:0009507(chloroplast);GO:0009534(chloroplast thylakoid);GO:0009535(chloroplast thylakoid membrane);GO:0009538(photosystem I reaction center);GO:0009579(thylakoid);GO:0009735(response to cytokinin);GO:0010287(plastoglobule);GO:0015979(photosynthesis);GO:0016020(membrane);GO:0016021(integral component of membrane)	00195(Photosynthesis)	189	180	0.671171	6.5	((((((-((((((.((((((((((&)))))))))).)))))).))))))	GGCUGG-UUCUGUGGUAGCAAAGU&AUUUUGCUGCAACAGAGACCGGUC	2	192.567	3	0.0706077	Output/DS_TL/cleaveLand_result/t_plot/nta-MIR6161b-p5_1ss20TC_MSTRG.1422.2_180_TPlot.pdf
XR_001657394.1:289	nta-miR6148a_L+1	XR_001657394.1	MSTRG.7074	LOC107826973	0	NA	NA	299	289	0.774286	5	((((.((((((((((((((.(((&)))-)))))))))))))).))))	UGAGUGCAAUCGAUCGAUGUUAG&CUA-CGUCGAUCGAUUGUUCUUA	2	192.567	3	0.0706077	Output/DS_TL/cleaveLand_result/t_plot/nta-miR6148a_L+1_XR_001657394.1_289_TPlot.pdf
XM_016585709.1:1370	nta-miR169q_R-1_1ss7AG	XM_016585709.1	107766835	LOC107766835	PREDICTED: nuclear transcription factor Y subunit A-3-like [Nicotiana tabacum]	GO:0003677(DNA binding);GO:0003700(transcription factor activity, sequence-specific DNA binding);GO:0005634(nucleus);GO:0006351(transcription, DNA-templated);GO:0006355(regulation of transcription, DNA-templated);GO:0016602(CCAAT-binding factor complex)	00970(Aminoacyl-tRNA biosynthesis)	1379	1370	0.77381	3.5	(((.(((((((((((((((.&.))))))))))))))).)))	UGGGAAGUCAUCCUUGGCUA&CAGCCAGGGAUGACUUGCCG	2	192.567	2	0.0738947	Output/DS_TL/cleaveLand_result/t_plot/nta-miR169q_R-1_1ss7AG_XM_016585709.1_1370_TPlot.pdf
XM_016620653.1:2337	nta-MIR6021-p3	XM_016620653.1	MSTRG.21371	LOC107797732	PREDICTED: 5-methyltetrahydropteroyltriglutamate--homocysteine methyltransferase [Nicotiana tomentosiformis]	GO:0003871(5-methyltetrahydropteroyltriglutamate-homocysteine S-methyltransferase activity);GO:0005576(extracellular region);GO:0005829(cytosol);GO:0008705(methionine synthase activity);GO:0050667(homocysteine metabolic process);GO:0050667(homocysteine metabolic process)	01230(Biosynthesis of amino acids);00270(Cysteine and methionine metabolism);00450(Selenocompound metabolism);00450(Selenocompound metabolism)	2346	2337	0.767677	5.5	(((((((((((((.(.(((((&))))).).)))))))))))))	GGGAGGGAGUGAAGUAUGGUG&CAUCACAGUUCACUCCUUCCC	2	192.567	2	0.0738947	Output/DS_TL/cleaveLand_result/t_plot/nta-MIR6021-p3_XM_016620653.1_2337_TPlot.pdf
XM_016650522.1:1233	nta-miR1446	XM_016650522.1	MSTRG.6043	LOC107823813	PREDICTED: heavy metal-associated isoprenylated plant protein 3-like [Nicotiana tabacum]	GO:0005737(cytoplasm);GO:0030001(metal ion transport);GO:0046914(transition metal ion binding);GO:0046916(cellular transition metal ion homeostasis)	NA	1242	1233	0.771496	5.5	.(((....((((((((((((((((&))))))))))))))))--..))).	CGUCUCACUGAGGGAGAGAGUUCA&UGAACUCUCUCCCUCA--AUGGCU	6	577.701	2	0.0738947	Output/DS_TL/cleaveLand_result/t_plot/nta-miR1446_XM_016650522.1_1233_TPlot.pdf
XR_001643055.1:1234	nta-miR171b	XR_001643055.1	#N/A	#N/A	#N/A	#N/A	#N/A	1243	1234	0.918782	2	..(((((((((((((((((((&)))))))))))))))))))..	AAUGAUAUUGGCGCGGCUCAA&UUGAGCCGCGCCAAUAUCACU	3	288.85	2	0.0738947	Output/DS_TL/cleaveLand_result/t_plot/nta-miR171b_XR_001643055.1_1234_TPlot.pdf
XR_001654432.1:483	nta-miR6025a	XR_001654432.1	107813818	LOC107813818	PREDICTED: putative late blight resistance protein homolog R1A-10 [Nicotiana tabacum]	GO:0005524(ATP binding);GO:0006952(defense response);GO:0009506(plasmodesma);GO:0043531(ADP binding);GO:0005634(nucleus);GO:0005737(cytoplasm);GO:0005886(plasma membrane);GO:0009626(plant-type hypersensitive response);GO:0009814(defense response, incompatible interaction);GO:0009814(defense response, incompatible interaction)	04626(Plant-pathogen interaction);04626(Plant-pathogen interaction)	492	483	0.892308	3.5	...(((((((((((((((((((&)))))))))))))))))))...	AACGUUGUCUCAAUUGUUGGUA&UACCAACAAUUGAGAUAACAUC	2	192.567	2	0.0738947	Output/DS_TL/cleaveLand_result/t_plot/nta-miR6025a_XR_001654432.1_483_TPlot.pdf
XM_016634077.1:846	nta-miR482b-3p	XM_016634077.1	107809438	LOC107809438	PREDICTED: putative late blight resistance protein homolog R1B-14 [Nicotiana tabacum]	GO:0005524(ATP binding);GO:0006952(defense response);GO:0043531(ADP binding)	04626(Plant-pathogen interaction)	855	846	0.871359	2.5	((.(((((((((((((((((((&))))))))))))))))))).))	GGUAUGGGUGGUAUUGGCAAGA&UCUUGCCAAUGCCAUCCAUUCC	2	192.567	3	0.0758279	Output/DS_TL/cleaveLand_result/t_plot/nta-miR482b-3p_XM_016634077.1_846_TPlot.pdf
XM_016631822.1:1023	nta-miR6024	XM_016631822.1	107807435	LOC107807435	PREDICTED: putative pentatricopeptide repeat-containing protein At5g09950 [Nicotiana sylvestris]	GO:0003674(molecular_function);GO:0005739(mitochondrion);GO:0008270(zinc ion binding);GO:0009451(RNA modification);GO:0009451(RNA modification)	00500(Starch and sucrose metabolism);00500(Starch and sucrose metabolism)	1032	1023	0.67036	6.5	...(((((((((.((((((((((&))))))))))-)))))))))...	GCUGAAGCAGCUACUGGCUAAAA&UUUUAGCCAG-AGUUGUUUUCCC	2	192.567	1	0.0759449	Output/DS_TL/cleaveLand_result/t_plot/nta-miR6024_XM_016631822.1_1023_TPlot.pdf
XM_016607673.1:987	nta-miR164a	XM_016607673.1	107786226	LOC107786226	PREDICTED: NAC domain-containing protein 100-like [Nicotiana tomentosiformis]	GO:0003677(DNA binding);GO:0003700(transcription factor activity, sequence-specific DNA binding);GO:0005634(nucleus);GO:0006351(transcription, DNA-templated);GO:0006355(regulation of transcription, DNA-templated);GO:0007275(multicellular organism development)	03018(RNA degradation)	996	987	0.769752	4	.(.(((((((.(((((((((((&))))))))))).)))))))-).	AGUCACGUGCACUGCUUCUCCA&UGGAGAAGCAGGGCACGUG-CA	2	192.567	3	0.0810188	Output/DS_TL/cleaveLand_result/t_plot/nta-miR164a_XM_016607673.1_987_TPlot.pdf
XM_016613372.1:1104	nta-MIR319b-p5	XM_016613372.1	MSTRG.19371	LOC107791333	PREDICTED: 6-phosphogluconate dehydrogenase, decarboxylating 2, chloroplastic-like [Nicotiana tabacum]	GO:0004616(phosphogluconate dehydrogenase (decarboxylating) activity);GO:0005515(protein binding);GO:0005737(cytoplasm);GO:0005739(mitochondrion);GO:0005829(cytosol);GO:0008114(phosphogluconate 2-dehydrogenase activity);GO:0009051(pentose-phosphate shunt, oxidative branch);GO:0009506(plasmodesma);GO:0009507(chloroplast);GO:0009536(plastid);GO:0009570(chloroplast stroma);GO:0009744(response to suc…	01200(Carbon metabolism);00030(Pentose phosphate pathway);00480(Glutathione metabolism)	1113	1104	0.794554	5.5	(((((((((((((((((..(.&.)..)))))))))))))))))	GAGUGGAUUGAAGGAAGAGCG&AGAGCUUCCUUCAGUCCACUC	2	192.567	3	0.0810188	Output/DS_TL/cleaveLand_result/t_plot/nta-MIR319b-p5_XM_016613372.1_1104_TPlot.pdf
XM_016644339.1:233	nta-MIR396b-p3	XM_016644339.1	MSTRG.4294	LOC107818343	PREDICTED: dnaJ-related protein SCJ1 isoform X2 [Nicotiana sylvestris]	GO:0005737(cytoplasm);GO:0006457(protein folding);GO:0006457(protein folding)	04141(Protein processing in endoplasmic reticulum);04141(Protein processing in endoplasmic reticulum)	242	233	0.681034	5	(((((((.((((((((((((.&.))))))))))))-)))))))	UUUUCCGUCGGUUUUCUUGGC&UCCAAGAAAGCUG-UGGGAAA	2	192.567	1	0.0835164	Output/DS_TL/cleaveLand_result/t_plot/nta-MIR396b-p3_XM_016644339.1_233_TPlot.pdf
XM_016582172.1:1187	nta-miR396b	XM_016582172.1	107763685	LOC107763685	PREDICTED: GPI ethanolamine phosphate transferase 2-like, partial [Nicotiana tabacum]	GO:0006506(GPI anchor biosynthetic process);GO:0030176(integral component of endoplasmic reticulum membrane);GO:0051267(CP2 mannose-ethanolamine phosphotransferase activity)	00563(Glycosylphosphatidylinositol(GPI)-anchor biosynthesis)	1196	1187	0.742515	6	..(((.(((((((((((((((.&.)))))))))))))))-)))..	ACGUUGCGGGAAAGUUGUGGAU&UUCCACAGCUUUCUUG-AACUU	5	481.417	1	0.0838933	Output/DS_TL/cleaveLand_result/t_plot/nta-miR396b_XM_016582172.1_1187_TPlot.pdf
XM_016627474.1:229	nta-miR395a	XM_016627474.1	107803708	LOC107803708	PREDICTED: low affinity sulfate transporter 3-like [Nicotiana sylvestris]	GO:0005887(integral component of plasma membrane);GO:0015116(sulfate transmembrane transporter activity)	NA	238	229	0.823529	2.5	.(((((((((((((((((((.&.))))))))))))))))))).	CAGUUCUCCCAAACACUUCAA&CUGAAGUGUUUGGGGGAACUC	1	96.2835	4	0.0851062	Output/DS_TL/cleaveLand_result/t_plot/nta-miR395a_XM_016627474.1_229_TPlot.pdf
XR_001647852.1:1107	nta-miR396b	XR_001647852.1	MSTRG.17516	LOC107785397	PREDICTED: BOI-related E3 ubiquitin-protein ligase 1-like isoform X1 [Nicotiana tabacum]	GO:0004842(ubiquitin-protein transferase activity);GO:0005634(nucleus);GO:0005737(cytoplasm);GO:0008270(zinc ion binding);GO:0016567(protein ubiquitination);GO:0031347(regulation of defense response);GO:0031347(regulation of defense response)	NA	1116	1107	0.883234	4.5	((((((((((((((((.(((.&.))).))))))))))))))))	AAGUUCAGGAAGGCUGCGGAG&UUCCACAGCUUUCUUGAACUU	1	96.2835	4	0.0851062	Output/DS_TL/cleaveLand_result/t_plot/nta-miR396b_XR_001647852.1_1107_TPlot.pdf
MSTRG.22803.1:1747	nta-miR171c	MSTRG.22803.1	MSTRG.22803	LOC107802311	0	NA	NA	1756	1747	1	1	(((((((((((((((((((((&)))))))))))))))))))))	GAUAUUGGCGCGGCUCAAUCA&UGAUUGAGCCGUGCCAAUAUC	10	962.835	2	0.0856683	Output/DS_TL/cleaveLand_result/t_plot/nta-miR171c_MSTRG.22803.1_1747_TPlot.pdf
XM_016579417.1:4766	nta-miR6020a-5p	XM_016579417.1	107761218	LOC107761218	PREDICTED: LOW QUALITY PROTEIN: uncharacterized protein LOC107761218, partial [Nicotiana tabacum]	GO:0005515(protein binding)	03040(Spliceosome);04141(Protein processing in endoplasmic reticulum);04144(Endocytosis)	4775	4766	1	1	(((((((((((((((((((((&)))))))))))))))))))))	GAAGAUACUCGGAAAACAUUU&AAAUGUUUUUCGAGUAUCUUC	4	385.134	2	0.0856683	Output/DS_TL/cleaveLand_result/t_plot/nta-miR6020a-5p_XM_016579417.1_4766_TPlot.pdf
XM_016585775.1:612	nta-miR390a_R+1	XM_016585775.1	MSTRG.11507	LOC107766888	PREDICTED: oxygen-dependent coproporphyrinogen-III oxidase, chloroplastic [Nicotiana tomentosiformis]	GO:0042803(protein homodimerization activity);GO:0042803(protein homodimerization activity)	00860(Porphyrin and chlorophyll metabolism);00860(Porphyrin and chlorophyll metabolism)	622	612	0.772523	4.5	.((((((((.(((((((.(((((&)))))-))))))).)))))))).	UGGUGUUAUGCCUCCUGAAGCUU&AAGCU-CAGGAGGGAUAGCACCU	2	192.567	2	0.0856683	Output/DS_TL/cleaveLand_result/t_plot/nta-miR390a_R+1_XM_016585775.1_612_TPlot.pdf
XM_016605824.1:407	nta-miR6024	XM_016605824.1	107784671	LOC107784671	PREDICTED: putative late blight resistance protein homolog R1B-12 [Nicotiana tabacum]	GO:0005524(ATP binding);GO:0005634(nucleus);GO:0005737(cytoplasm);GO:0005886(plasma membrane);GO:0006952(defense response);GO:0009626(plant-type hypersensitive response);GO:0009814(defense response, incompatible interaction);GO:0043531(ADP binding);GO:0043531(ADP binding)	04626(Plant-pathogen interaction);04626(Plant-pathogen interaction)	416	407	0.789474	3	((.(((((((((((((((((((&))))))))))))))))))).))	GGCAAAACAACUUUGGCUAGAA&UUUUAGCCAGAGUUGUUUUCCC	5	481.417	2	0.0856683	Output/DS_TL/cleaveLand_result/t_plot/nta-miR6024_XM_016605824.1_407_TPlot.pdf
XM_016618596.1:739	nta-MIR167a-p3	XM_016618596.1	MSTRG.20832	LOC107795891	protochlorophyllide reductase, chloroplastic-like [Nicotiana tabacum]	GO:0009507(chloroplast);GO:0009534(chloroplast thylakoid);GO:0009723(response to ethylene);GO:0009941(chloroplast envelope);GO:0015979(photosynthesis);GO:0015995(chlorophyll biosynthetic process);GO:0016491(oxidoreductase activity);GO:0016630(protochlorophyllide reductase activity);GO:0055114(oxidation-reduction process)	00860(Porphyrin and chlorophyll metabolism)	748	739	0.821918	5	...(..(((((((((((((((&)))))))))))))))..)...	AAGGUUGCUGCUAGAUGACCU&AGGUCAUCUAGCAGCUUCAAU	3	288.85	2	0.0856683	Output/DS_TL/cleaveLand_result/t_plot/nta-MIR167a-p3_XM_016618596.1_739_TPlot.pdf
XM_016629402.1:3990	nta-MIR6145d-p3	XM_016629402.1	MSTRG.252	LOC107805347	PREDICTED: exportin-1-like isoform X2 [Nicotiana sylvestris]	GO:0000059(protein import into nucleus, docking);GO:0004872(receptor activity);GO:0005515(protein binding);GO:0005634(nucleus);GO:0005643(nuclear pore);GO:0005737(cytoplasm);GO:0005829(cytosol);GO:0006611(protein export from nucleus);GO:0008536(Ran GTPase binding);GO:0008565(protein transporter activity);GO:0009408(response to heat);GO:0009553(embryo sac development);GO:0009555(pollen development…	03013(RNA transport);03008(Ribosome biogenesis in eukaryotes)	3999	3990	0.813291	7	((((((((((((((((((..&..))))))))))))))))))	GGAUUGUUGCAUUGACAUAA&CAGUGUUAGUGUAACAAUCC	2	192.567	2	0.0856683	Output/DS_TL/cleaveLand_result/t_plot/nta-MIR6145d-p3_XM_016629402.1_3990_TPlot.pdf
XM_016635927.1:328	nta-miR827	XM_016635927.1	107811072	LOC107811072	PREDICTED: SPX domain-containing membrane protein At4g22990-like isoform X1 [Nicotiana tabacum]	GO:0005622(intracellular);GO:0005623(cell);GO:0006817(phosphate ion transport);GO:0009705(plant-type vacuole membrane);GO:0016021(integral component of membrane);GO:0055085(transmembrane transport);GO:0055085(transmembrane transport)	NA	337	328	0.823129	3	((((((((((((.((((((((&)))))))).))))))))))))	UGUUUGUUGAUGCUUAUCUAA&UUAGAUGAACAUCAACAAACA	2	192.567	2	0.0856683	Output/DS_TL/cleaveLand_result/t_plot/nta-miR827_XM_016635927.1_328_TPlot.pdf
XM_016640663.1:234	nta-miR6020b	XM_016640663.1	107815146	LOC107815146	PREDICTED: TMV resistance protein N-like [Nicotiana tabacum]	GO:0005515(protein binding);GO:0005515(protein binding)	03040(Spliceosome);04141(Protein processing in endoplasmic reticulum);04144(Endocytosis);04144(Endocytosis)	243	234	0.937908	1	((.((((((((((((((((((&)))))))))))))))))).))	GAUGAUACUCGAAGAACAUUU&AAAUGUUCUUCGAGUAUCUUC	4	385.134	2	0.0856683	Output/DS_TL/cleaveLand_result/t_plot/nta-miR6020b_XM_016640663.1_234_TPlot.pdf
XM_016642155.1:102	nta-miR394	XM_016642155.1	MSTRG.3683	LOC107816435	PREDICTED: glycine-rich protein 2 [Nicotiana tomentosiformis]	GO:0003676(nucleic acid binding);GO:0003690(double-stranded DNA binding);GO:0003697(single-stranded DNA binding);GO:0003729(mRNA binding);GO:0005634(nucleus);GO:0005730(nucleolus);GO:0005737(cytoplasm);GO:0005829(cytosol);GO:0005886(plasma membrane);GO:0006355(regulation of transcription, DNA-templated);GO:0008270(zinc ion binding);GO:0009269(response to desiccation);GO:0009409(response to cold);…	03013(RNA transport)	111	102	0.767857	5	((((.((((((((((.(((((&))))).))))))))))-))))	GGAGAGUGGACAGAGGGCUAA&UUGGCAUUCUGUCCAC-CUCC	3	288.85	3	0.0861805	Output/DS_TL/cleaveLand_result/t_plot/nta-miR394_XM_016642155.1_102_TPlot.pdf
XM_016654585.1:2193	nta-MIR6021-p3	XM_016654585.1	MSTRG.7239	LOC107827442	PREDICTED: 5-methyltetrahydropteroyltriglutamate--homocysteine methyltransferase [Nicotiana tabacum]	GO:0003871(5-methyltetrahydropteroyltriglutamate-homocysteine S-methyltransferase activity);GO:0005576(extracellular region);GO:0005829(cytosol);GO:0008705(methionine synthase activity);GO:0050667(homocysteine metabolic process)	01230(Biosynthesis of amino acids);00270(Cysteine and methionine metabolism);00450(Selenocompound metabolism)	2202	2193	0.744949	6	(((((((((((((.(.(((((&))))).).)))))))))))))	GGGAGGGGGUGAAGUAUGGUG&CAUCACAGUUCACUCCUUCCC	2	192.567	3	0.0861805	Output/DS_TL/cleaveLand_result/t_plot/nta-MIR6021-p3_XM_016654585.1_2193_TPlot.pdf
XM_016610355.1:1700	nta-miR482b-5p	XM_016610355.1	MSTRG.18532	LOC107788658	PREDICTED: callose synthase 9-like, partial [Nicotiana tabacum]	GO:0000148(1,3-beta-D-glucan synthase complex);GO:0003843(1,3-beta-D-glucan synthase activity);GO:0005886(plasma membrane)	00500(Starch and sucrose metabolism)	1710	1700	0.686375	6	.((((((.(((((.((((((((&))))))))-))))).)))))).	CAUCUUAGCAUUCAUACCCACU&AGUGGGUG-GAGUGGUAAGAUA	6	577.701	1	0.0940123	Output/DS_TL/cleaveLand_result/t_plot/nta-miR482b-5p_XM_016610355.1_1700_TPlot.pdf
XM_016577582.1:239	nta-MIR156j-p3	XM_016577582.1	MSTRG.9172	LOC107759606	PREDICTED: uncharacterized protein LOC107759606 [Nicotiana tabacum]	GO:0003674(molecular_function);GO:0008150(biological_process);GO:0009507(chloroplast)	NA	248	239	0.677165	6.5	(((((-((((((..(((((((&)))))))..)))))).)))))	GAUGA-GGAAGUGGAGAGAGC&GCUCUCUAUGCUUCUGUCAUC	10	962.835	0	0.0945555	Output/DS_TL/cleaveLand_result/t_plot/nta-MIR156j-p3_XM_016577582.1_239_TPlot.pdf
XM_016603899.1:194	nta-MIR482c-p5	XM_016603899.1	#N/A	#N/A	#N/A	#N/A	#N/A	202	194	0.657005	6.5	((-(((((((.(((((-(((((&))))).)))))-))))))).))	GC-UUCCAGCGCCACC-AUCUC&GGGAUUGGUGG-GUUGGAAAGC	2	192.567	0	0.0963891	Output/DS_TL/cleaveLand_result/t_plot/nta-MIR482c-p5_XM_016603899.1_194_TPlot.pdf
XM_016609388.1:2301	nta-miR167a_L+1R-1	XM_016609388.1	MSTRG.18251	LOC107787782	PREDICTED: auxin response factor 8-like [Nicotiana sylvestris]	GO:0003677(DNA binding);GO:0003700(transcription factor activity, sequence-specific DNA binding);GO:0005634(nucleus);GO:0006351(transcription, DNA-templated);GO:0006355(regulation of transcription, DNA-templated);GO:0009733(response to auxin);GO:0009734(auxin-activated signaling pathway);GO:0009908(flower development)	04075(Plant hormone signal transduction)	2310	2301	0.752427	7	.((((((.(((((((((((...&...))))))))))).)))))).	AAGAUCAGGCUGGCAGCUUGUA&UUGAAGCUGCCAGCAUGAUCUG	2	192.567	3	0.0964172	Output/DS_TL/cleaveLand_result/t_plot/nta-miR167a_L+1R-1_XM_016609388.1_2301_TPlot.pdf
MSTRG.14605.1:48	nta-MIR6160-p3_1ss12TC	MSTRG.14605.1	MSTRG.14605	.	0	NA	NA	58	48	0.718676	5.5	.((((((((-(((((((((((.(((&)))-))))))))))).)))))))).	AGGUCUGUG-AUGCCCUUAGAUGUU&AAC-UCUAAGGGCAUAUAUGGACCA	144	13864.8	2	0.0972922	Output/DS_TL/cleaveLand_result/t_plot/nta-MIR6160-p3_1ss12TC_MSTRG.14605.1_48_TPlot.pdf
XM_016641125.1:391	nta-miR390a	XM_016641125.1	MSTRG.3378	LOC107815524	PREDICTED: oxygen-dependent coproporphyrinogen-III oxidase, chloroplastic [Nicotiana sylvestris]	GO:0042803(protein homodimerization activity)	00860(Porphyrin and chlorophyll metabolism)	401	391	0.792056	3.5	((((((((.(((((((.(((((&)))))-))))))).))))))))	GGUGUUAUGCCUCCUGAAGCUU&AAGCU-CAGGAGGGAUAGCACC	2	192.567	2	0.0972922	Output/DS_TL/cleaveLand_result/t_plot/nta-miR390a_XM_016641125.1_391_TPlot.pdf
XM_016644499.1:992	nta-miR399a	XM_016644499.1	MSTRG.4338	LOC107818475	PREDICTED: probable ubiquitin-conjugating enzyme E2 24 [Nicotiana tabacum]	GO:0005737(cytoplasm);GO:0031625(ubiquitin protein ligase binding);GO:0061630(ubiquitin protein ligase activity);GO:0061630(ubiquitin protein ligase activity)	04120(Ubiquitin mediated proteolysis);04120(Ubiquitin mediated proteolysis)	1001	992	0.758315	3.5	(((((((..(((((((((((.&.)))))))))))..)))))))	UAGGGCAAAUCUCCUUUGGCA&CGCCAAAGGAGAGCUGCCCUG	3	288.85	2	0.0972922	Output/DS_TL/cleaveLand_result/t_plot/nta-miR399a_XM_016644499.1_992_TPlot.pdf
XM_016652412.1:773	nta-MIR167c-p3	XM_016652412.1	MSTRG.6586	LOC107825540	PREDICTED: protochlorophyllide reductase, chloroplastic-like isoform X1 [Nicotiana tomentosiformis]	GO:0005515(protein binding);GO:0009507(chloroplast);GO:0009534(chloroplast thylakoid);GO:0009535(chloroplast thylakoid membrane);GO:0009707(chloroplast outer membrane);GO:0009723(response to ethylene);GO:0009941(chloroplast envelope);GO:0015979(photosynthesis);GO:0015995(chlorophyll biosynthetic process);GO:0016020(membrane);GO:0016491(oxidoreductase activity);GO:0016630(protochlorophyllide reduc…	00860(Porphyrin and chlorophyll metabolism);00860(Porphyrin and chlorophyll metabolism)	782	773	0.821918	5	...(..(((((((((((((((&)))))))))))))))..)...	AAGGUUGCUGCUAGAUGACCU&AGGUCAUCUAGCAGCUUCAAU	2	192.567	2	0.0972922	Output/DS_TL/cleaveLand_result/t_plot/nta-MIR167c-p3_XM_016652412.1_773_TPlot.pdf
XR_001654433.1:483	nta-miR6025a	XR_001654433.1	107813818	LOC107813818	PREDICTED: putative late blight resistance protein homolog R1A-10 [Nicotiana tabacum]	GO:0005524(ATP binding);GO:0006952(defense response);GO:0009506(plasmodesma);GO:0043531(ADP binding);GO:0005634(nucleus);GO:0005737(cytoplasm);GO:0005886(plasma membrane);GO:0009626(plant-type hypersensitive response);GO:0009814(defense response, incompatible interaction);GO:0009814(defense response, incompatible interaction)	04626(Plant-pathogen interaction);04626(Plant-pathogen interaction)	492	483	0.892308	3.5	...(((((((((((((((((((&)))))))))))))))))))...	AACGUUGUCUCAAUUGUUGGUA&UACCAACAAUUGAGAUAACAUC	2	192.567	2	0.0972922	Output/DS_TL/cleaveLand_result/t_plot/nta-miR6025a_XR_001654433.1_483_TPlot.pdf
XM_016629079.1:633	nta-miR390b	XM_016629079.1	MSTRG.23679	LOC107805098	PREDICTED: photosystem II 22 kDa protein, chloroplastic-like [Nicotiana tabacum]	GO:0009507(chloroplast);GO:0009517(PSII associated light-harvesting complex II);GO:0009523(photosystem II);GO:0009534(chloroplast thylakoid);GO:0009535(chloroplast thylakoid membrane);GO:0009579(thylakoid);GO:0010027(thylakoid membrane organization);GO:0010196(nonphotochemical quenching);GO:0015979(photosynthesis);GO:0016020(membrane);GO:0016021(integral component of membrane);GO:0016168(chloroph…	00195(Photosynthesis)	641	633	0.747178	6.5	(((.(((((((((((((-((..&..)).)))))))))))))-)))	GGCUGUUAUCCCUCCUG-GCAA&AAGCUCAGGAGGGAUAGC-GCC	2	192.567	3	0.101492	Output/DS_TL/cleaveLand_result/t_plot/nta-miR390b_XM_016629079.1_633_TPlot.pdf
XM_016579639.1:2778	nta-miR172a_R-1	XM_016579639.1	107761409	LOC107761409	PREDICTED: calmodulin-binding transcription activator 4-like, partial [Nicotiana tabacum]	GO:0001077(transcriptional activator activity, RNA polymerase II core promoter proximal region sequence-specific binding);GO:0005634(nucleus);GO:0043565(sequence-specific DNA binding);GO:0045944(positive regulation of transcription from RNA polymerase II promoter)	NA	2786	2778	0.686747	7	.((((((...(((((-(((((((&))))))).)))))---)))))).	GGCAGCAAUAUCAUC-GGAUUCU&AGAAUCUUGAUGA---UGCUGCA	11	1059.12	0	0.104465	Output/DS_TL/cleaveLand_result/t_plot/nta-miR172a_R-1_XM_016579639.1_2778_TPlot.pdf
XM_016585793.1:417	nta-miR6021	XM_016585793.1	MSTRG.1150	LOC107766900	PREDICTED: LRR receptor-like serine/threonine-protein kinase FLS2 [Nicotiana tabacum]	GO:0006952(defense response);GO:0007165(signal transduction);GO:0016020(membrane);GO:0016021(integral component of membrane)	04626(Plant-pathogen interaction)	426	417	0.875969	3	.((((((((((((((((((((&)))))))))))))))))))).	CCCAAUAGUAGCCUUUUCCAG&UUGGAAGAGGCUGCUAUUGGA	1	96.2835	4	0.105226	Output/DS_TL/cleaveLand_result/t_plot/nta-miR6021_XM_016585793.1_417_TPlot.pdf
XM_016595684.1:3320	nta-miR477a	XM_016595684.1	MSTRG.14485	LOC107775885	PREDICTED: NF-X1-type zinc finger protein NFXL1 [Nicotiana sylvestris]	GO:0000122(negative regulation of transcription from RNA polymerase II promoter);GO:0000977(RNA polymerase II regulatory region sequence-specific DNA binding);GO:0001078(transcriptional repressor activity, RNA polymerase II core promoter proximal region sequence-specific binding);GO:0005634(nucleus);GO:0006366(transcription from RNA polymerase II promoter)	NA	3329	3320	0.839623	7	(((((((((...((((((((((((&))))))))))))---)))))))))	CAGGAGCCUCAUUUGAGGGAGAGU&ACUCUCCCUCAA---GGGCUUCUG	1	96.2835	4	0.105226	Output/DS_TL/cleaveLand_result/t_plot/nta-miR477a_XM_016595684.1_3320_TPlot.pdf
XM_016606698.1:1107	nta-miR396b	XM_016606698.1	MSTRG.17516	LOC107785397	PREDICTED: BOI-related E3 ubiquitin-protein ligase 1-like isoform X1 [Nicotiana tabacum]	GO:0004842(ubiquitin-protein transferase activity);GO:0005634(nucleus);GO:0005737(cytoplasm);GO:0008270(zinc ion binding);GO:0016567(protein ubiquitination);GO:0031347(regulation of defense response);GO:0031347(regulation of defense response)	NA	1116	1107	0.883234	4.5	((((((((((((((((.(((.&.))).))))))))))))))))	AAGUUCAGGAAGGCUGCGGAG&UUCCACAGCUUUCUUGAACUU	1	96.2835	4	0.105226	Output/DS_TL/cleaveLand_result/t_plot/nta-miR396b_XM_016606698.1_1107_TPlot.pdf
XM_016611618.1:270	nta-miR6020a-5p	XM_016611618.1	107789752	LOC107789752	PREDICTED: TMV resistance protein N-like [Nicotiana tabacum]	GO:0005515(protein binding);GO:0005515(protein binding)	03040(Spliceosome);04141(Protein processing in endoplasmic reticulum);04144(Endocytosis);04144(Endocytosis)	279	270	1	1	(((((((((((((((((((((&)))))))))))))))))))))	GAAGAUACUCGGAAAACAUUU&AAAUGUUUUUCGAGUAUCUUC	1	96.2835	4	0.105226	Output/DS_TL/cleaveLand_result/t_plot/nta-miR6020a-5p_XM_016611618.1_270_TPlot.pdf
XM_016615797.1:384	nta-miR6025b	XM_016615797.1	107793445	LOC107793445	PREDICTED: peroxisomal nicotinamide adenine dinucleotide carrier-like [Nicotiana tabacum]	GO:0003735(structural constituent of ribosome);GO:0006412(translation);GO:0006412(translation)	04146(Peroxisome);04146(Peroxisome)	392	384	0.846774	3.5	((((((((((((((-(((((((&))))))).))))))))))))))	GAUGUUAUCUCAGU-GUUGGCA&UGCCAACUAUUGAGAUGACAUC	1	96.2835	4	0.105226	Output/DS_TL/cleaveLand_result/t_plot/nta-miR6025b_XM_016615797.1_384_TPlot.pdf
XM_016618329.1:1465	nta-MIR167e-p3	XM_016618329.1	MSTRG.20761	LOC107795655	PREDICTED: NADH dehydrogenase [ubiquinone] flavoprotein 1, mitochondrial-like [Nicotiana tabacum]	GO:0003954(NADH dehydrogenase activity);GO:0009060(aerobic respiration);GO:0010181(FMN binding);GO:0051287(NAD binding);GO:0051539(4 iron, 4 sulfur cluster binding)	00190(Oxidative phosphorylation)	1474	1465	0.804878	6	((((((((((((((.(((.(&).))).))))))))))))))	GGUGAUGCUGCUGCUUGGCC&GAUCAUGUAGCAGCAUCACC	1	96.2835	4	0.105226	Output/DS_TL/cleaveLand_result/t_plot/nta-MIR167e-p3_XM_016618329.1_1465_TPlot.pdf
XM_016623629.1:974	nta-miR6145b_L+2R-1	XM_016623629.1	MSTRG.22209	LOC107800462	PREDICTED: adenosylhomocysteinase-like [Nicotiana tomentosiformis]	GO:0004013(adenosylhomocysteinase activity);GO:0005829(cytosol);GO:0033353(S-adenosylmethionine cycle)	00270(Cysteine and methionine metabolism)	983	974	0.764368	6	((((((((-(((((((((.(((&))).))))))))).))))))))	GCUGGUGC-ACGUGUGAUCGUG&UAUUAUCAUACGUAGCACUAGC	1	96.2835	4	0.105226	Output/DS_TL/cleaveLand_result/t_plot/nta-miR6145b_L+2R-1_XM_016623629.1_974_TPlot.pdf
MSTRG.18795.2:641	nta-miR168d	MSTRG.18795.2	MSTRG.18795	LOC107789474	0	NA	NA	650	641	0.798627	6	..(((((.(((((((((((..&..))))))))))).)))))..	CACCCGAGCUGCACCAAGCUA&UCGCUUGGUGCAGGUCGGGAA	15	1444.25	2	0.108768	Output/DS_TL/cleaveLand_result/t_plot/nta-miR168d_MSTRG.18795.2_641_TPlot.pdf
XM_016577864.1:1229	nta-MIR390c-p3	XM_016577864.1	MSTRG.9261	LOC107759852	PREDICTED: BTB/POZ domain-containing protein At1g30440-like [Nicotiana tabacum]	GO:0004871(signal transducer activity);GO:0005886(plasma membrane);GO:0009416(response to light stimulus);GO:0016567(protein ubiquitination)	00902(Monoterpenoid biosynthesis)	1238	1229	0.797333	3.5	(((((.(.((((((((((((.&.)))))))))))).).)))))	UGAAAGUGGGGAUGGAUAGCA&CGCUAUCCAUCCUGAGUUUCA	6	577.701	2	0.108768	Output/DS_TL/cleaveLand_result/t_plot/nta-MIR390c-p3_XM_016577864.1_1229_TPlot.pdf
XM_016582020.1:1398	nta-miR171c	XM_016582020.1	107763536	LOC107763536	PREDICTED: scarecrow-like protein 6 isoform X2 [Nicotiana tabacum]	GO:0003700(transcription factor activity, sequence-specific DNA binding);GO:0005634(nucleus);GO:0006355(regulation of transcription, DNA-templated);GO:0030154(cell differentiation);GO:0043565(sequence-specific DNA binding);GO:0043565(sequence-specific DNA binding)	04075(Plant hormone signal transduction);04075(Plant hormone signal transduction)	1407	1398	1	1	(((((((((((((((((((((&)))))))))))))))))))))	GAUAUUGGCGCGGCUCAAUCA&UGAUUGAGCCGUGCCAAUAUC	12	1155.4	2	0.108768	Output/DS_TL/cleaveLand_result/t_plot/nta-miR171c_XM_016582020.1_1398_TPlot.pdf
XM_016636435.1:1129	nta-miR399a	XM_016636435.1	MSTRG.25683	LOC107811493	PREDICTED: probable ubiquitin-conjugating enzyme E2 24 [Nicotiana tabacum]	GO:0005737(cytoplasm);GO:0031625(ubiquitin protein ligase binding);GO:0061630(ubiquitin protein ligase activity);GO:0061630(ubiquitin protein ligase activity)	04120(Ubiquitin mediated proteolysis);04120(Ubiquitin mediated proteolysis)	1138	1129	0.758315	3.5	(((((((..(((((((((((.&.)))))))))))..)))))))	UAGGGCAAAUCUCCUUUGGCA&CGCCAAAGGAGAGCUGCCCUG	2	192.567	2	0.108768	Output/DS_TL/cleaveLand_result/t_plot/nta-miR399a_XM_016636435.1_1129_TPlot.pdf
XM_016645099.1:116	nta-MIR6163-p3	XM_016645099.1	MSTRG.4517	LOC107819024	PREDICTED: uncharacterized protein LOC104092355 [Nicotiana tomentosiformis]	GO:0003674(molecular_function);GO:0008150(biological_process);GO:0016021(integral component of membrane)	NA	125	116	0.708447	5	((.((.(((((((((((.((((((&)))))).)))))))))))-))-))	GGUCGUGUGCUUCCAAGCUAAUCA&UGAUUAACUUGGAAGUAC-UG-CC	4	385.134	2	0.108768	Output/DS_TL/cleaveLand_result/t_plot/nta-MIR6163-p3_XM_016645099.1_116_TPlot.pdf
XM_016645922.1:1872	nta-miR172c	XM_016645922.1	MSTRG.4757	LOC107819773	PREDICTED: AP2-like ethylene-responsive transcription factor TOE3 isoform X3 [Nicotiana sylvestris]	GO:0003677(DNA binding);GO:0003700(transcription factor activity, sequence-specific DNA binding);GO:0005634(nucleus);GO:0006351(transcription, DNA-templated);GO:0006355(regulation of transcription, DNA-templated);GO:0009908(flower development);GO:0010073(meristem maintenance);GO:0010093(specification of floral organ identity);GO:0019953(sexual reproduction);GO:0030154(cell differentiation);GO:004…	04075(Plant hormone signal transduction);04075(Plant hormone signal transduction)	1881	1872	0.997085	2	.((((((((((((((((((((&)))))))))))))))))))).	CUGCAGCAUCAUCAGGAUUCU&AGAAUCUUGAUGAUGCUGCAU	9	866.551	2	0.108768	Output/DS_TL/cleaveLand_result/t_plot/nta-miR172c_XM_016645922.1_1872_TPlot.pdf
XM_016620632.1:1910	nta-miR172c	XM_016620632.1	107797717	LOC107797717	PREDICTED: liprin-alpha-2-like isoform X2 [Nicotiana tabacum]	GO:0003674(molecular_function);GO:0005737(cytoplasm);GO:0009793(embryo development ending in seed dormancy);GO:0009793(embryo development ending in seed dormancy)	NA	1919	1910	0.6793	4	((((.(.((.(((((((((((((&)))))))))))))-))-).))))	AUGCUGACAUUCAUCGAGAUUCU&AGAAUCUUGAUGA-UG-CUGCAU	2	192.567	1	0.110995	Output/DS_TL/cleaveLand_result/t_plot/nta-miR172c_XM_016620632.1_1910_TPlot.pdf
XM_016638440.1:498	nta-miR168d	XM_016638440.1	MSTRG.26187	LOC107813208	PREDICTED: probable calcium-binding protein CML36 [Nicotiana sylvestris]	GO:0005509(calcium ion binding);GO:0005515(protein binding);GO:0005886(plasma membrane);GO:0050832(defense response to fungus)	04626(Plant-pathogen interaction)	507	498	0.729977	7	..(((((((--((((((((((&))))))))))..)))))))..	GACCCGACC--CGCCAAGCGA&UCGCUUGGUGCAGGUCGGGAA	3	288.85	3	0.111558	Output/DS_TL/cleaveLand_result/t_plot/nta-miR168d_XM_016638440.1_498_TPlot.pdf
XM_016657318.1:1742	nta-miR167a_L+1R-1	XM_016657318.1	MSTRG.8049	LOC107829853	PREDICTED: auxin response factor 8-like [Nicotiana tabacum]	GO:0003677(DNA binding);GO:0003700(transcription factor activity, sequence-specific DNA binding);GO:0005634(nucleus);GO:0006351(transcription, DNA-templated);GO:0006355(regulation of transcription, DNA-templated);GO:0009733(response to auxin);GO:0009734(auxin-activated signaling pathway);GO:0009908(flower development)	04075(Plant hormone signal transduction)	1751	1742	0.752427	7	.((((((.(((((((((((...&...))))))))))).)))))).	AAGAUCAGGCUGGCAGCUUGUA&UUGAAGCUGCCAGCAUGAUCUG	2	192.567	3	0.111558	Output/DS_TL/cleaveLand_result/t_plot/nta-miR167a_L+1R-1_XM_016657318.1_1742_TPlot.pdf
XM_016611760.1:258	nta-MIR156j-p3	XM_016611760.1	MSTRG.18920	LOC107789885	PREDICTED: universal stress protein A-like protein [Nicotiana sylvestris]	GO:0005737(cytoplasm);GO:0006950(response to stress);GO:0016787(hydrolase activity);GO:0016787(hydrolase activity)	NA	267	258	0.682415	6	(.(((((((((((.(((((((&))))))).))))))))))).)	GUUGACGGAAGUGAAGAGAGU&GCUCUCUAUGCUUCUGUCAUC	2	192.567	1	0.114645	Output/DS_TL/cleaveLand_result/t_plot/nta-MIR156j-p3_XM_016611760.1_258_TPlot.pdf
XM_016644130.1:640	nta-MIR6161c-p3_1ss7AG	XM_016644130.1	MSTRG.433	LOC107818180	PREDICTED: threonine dehydratase biosynthetic, chloroplastic-like [Nicotiana tabacum]	GO:0004794(L-threonine ammonia-lyase activity);GO:0005737(cytoplasm);GO:0009097(isoleucine biosynthetic process);GO:0030170(pyridoxal phosphate binding)	01200(Carbon metabolism);01230(Biosynthesis of amino acids);00260(Glycine, serine and threonine metabolism);00290(Valine, leucine and isoleucine biosynthesis)	650	640	0.698901	6.5	.(((((((.-((((((((.((((((&))))))-))))))))..))))))).	AGCUGGAAA-UCAUGCACAAGGUGU&GCACCU-GUGUAUGAACUUCCAGCA	2	192.567	3	0.116548	Output/DS_TL/cleaveLand_result/t_plot/nta-MIR6161c-p3_1ss7AG_XM_016644130.1_640_TPlot.pdf
XM_016649266.1:539	nta-MIR6162-p3	XM_016649266.1	MSTRG.5678	LOC107822705	PREDICTED: probable plastid-lipid-associated protein 4, chloroplastic [Nicotiana tabacum]	GO:0005198(structural molecule activity);GO:0008150(biological_process);GO:0009507(chloroplast);GO:0009534(chloroplast thylakoid);GO:0009535(chloroplast thylakoid membrane);GO:0010287(plastoglobule)	NA	548	539	0.694286	7	...((((((((((((((((((&))))))))))))))))))...	AAUGGAAAGUGGGAGCUUUUG&CAAGGGCUUCCAUUUUUCUGA	4	385.134	0	0.118105	Output/DS_TL/cleaveLand_result/t_plot/nta-MIR6162-p3_XM_016649266.1_539_TPlot.pdf
XM_016582024.1:1069	nta-miR171c	XM_016582024.1	107763537	LOC107763537	PREDICTED: scarecrow-like protein 6 isoform X1 [Nicotiana tabacum]	GO:0003700(transcription factor activity, sequence-specific DNA binding);GO:0005634(nucleus);GO:0006355(regulation of transcription, DNA-templated);GO:0030154(cell differentiation);GO:0043565(sequence-specific DNA binding);GO:0043565(sequence-specific DNA binding)	04075(Plant hormone signal transduction);04075(Plant hormone signal transduction)	1078	1069	1	1	(((((((((((((((((((((&)))))))))))))))))))))	GAUAUUGGCGCGGCUCAAUCA&UGAUUGAGCCGUGCCAAUAUC	4	385.134	2	0.120099	Output/DS_TL/cleaveLand_result/t_plot/nta-miR171c_XM_016582024.1_1069_TPlot.pdf
XM_016624529.1:356	nta-miR6161d_L+3	XM_016624529.1	MSTRG.22472	LOC107801244	PREDICTED: polyribonucleotide nucleotidyltransferase 1, chloroplastic-like [Nicotiana tabacum]	GO:0000175(3'-5'-exoribonuclease activity);GO:0003676(nucleic acid binding);GO:0003723(RNA binding);GO:0004654(polyribonucleotide nucleotidyltransferase activity);GO:0006364(rRNA processing);GO:0006397(mRNA processing);GO:0006401(RNA catabolic process);GO:0006402(mRNA catabolic process);GO:0008033(tRNA processing);GO:0009507(chloroplast);GO:0009570(chloroplast stroma);GO:0010323(negative regulati…	00230(Purine metabolism);00240(Pyrimidine metabolism);03018(RNA degradation)	365	356	0.740957	7	.(((....(((((((((((((((.&.)))))))))))))))....))).	UGUGGGUAGUGCUGGAGUUCAAGC&ACUUGAACUCCAGCAUAUUAUACU	2	192.567	2	0.120099	Output/DS_TL/cleaveLand_result/t_plot/nta-miR6161d_L+3_XM_016624529.1_356_TPlot.pdf
XM_016636436.1:1200	nta-miR399a	XM_016636436.1	MSTRG.25683	LOC107811493	PREDICTED: probable ubiquitin-conjugating enzyme E2 24 [Nicotiana tabacum]	GO:0005737(cytoplasm);GO:0031625(ubiquitin protein ligase binding);GO:0061630(ubiquitin protein ligase activity);GO:0061630(ubiquitin protein ligase activity)	04120(Ubiquitin mediated proteolysis);04120(Ubiquitin mediated proteolysis)	1209	1200	0.758315	3.5	(((((((..(((((((((((.&.)))))))))))..)))))))	UAGGGCAAAUCUCCUUUGGCA&CGCCAAAGGAGAGCUGCCCUG	3	288.85	2	0.120099	Output/DS_TL/cleaveLand_result/t_plot/nta-miR399a_XM_016636436.1_1200_TPlot.pdf
XM_016657348.1:1670	nta-MIR166b-p5	XM_016657348.1	MSTRG.8057	LOC107829878	PREDICTED: lysophospholipid acyltransferase LPEAT1 isoform X1 [Nicotiana sylvestris]	GO:0005634(nucleus);GO:0005783(endoplasmic reticulum);GO:0005789(endoplasmic reticulum membrane);GO:0006644(phospholipid metabolic process);GO:0008654(phospholipid biosynthetic process);GO:0016021(integral component of membrane);GO:0016746(transferase activity, transferring acyl groups);GO:0050200(plasmalogen synthase activity);GO:0050200(plasmalogen synthase activity)	00564(Glycerophospholipid metabolism);00565(Ether lipid metabolism);00565(Ether lipid metabolism)	1680	1670	0.726804	5.5	(((((.((((((((((((.((((&))))-))))))))))))-)))))	GCUUCUGAGCUAGACAACUGUUU&GAAU-GUUGUCUGGCUC-GAAGC	3	288.85	2	0.120099	Output/DS_TL/cleaveLand_result/t_plot/nta-MIR166b-p5_XM_016657348.1_1670_TPlot.pdf
XM_016607274.1:615	nta-MIR319b-p5	XM_016607274.1	MSTRG.17665	LOC107785877	PREDICTED: delta(24)-sterol reductase isoform X1 [Nicotiana tabacum]	GO:0008202(steroid metabolic process);GO:0008202(steroid metabolic process)	00100(Steroid biosynthesis);00100(Steroid biosynthesis)	624	615	0.772277	4.5	....(((((((((((((((((&)))))))))))))))))....	UACGGGAUUGAAGGAAGCUCU&AGAGCUUCCUUCAGUCCACUC	2	192.567	3	0.12151	Output/DS_TL/cleaveLand_result/t_plot/nta-MIR319b-p5_XM_016607274.1_615_TPlot.pdf
XM_016622259.1:454	nta-MIR169s-p5	XM_016622259.1	MSTRG.21799	LOC107799172	PREDICTED: LIM domain-containing protein WLIM1-like isoform X1 [Nicotiana tomentosiformis]	GO:0003700(transcription factor activity, sequence-specific DNA binding);GO:0005737(cytoplasm);GO:0005856(cytoskeleton);GO:0005886(plasma membrane);GO:0008270(zinc ion binding);GO:0051015(actin filament binding);GO:0051017(actin filament bundle assembly)	NA	463	454	0.737931	6.5	((((((((..(((((((((((.&.)))))))))))-.))))))))	GCCAGGGAAAGAUCUGCUGAUC&UAUCGGCAGGUC-GUCCUUGGC	2	192.567	3	0.12151	Output/DS_TL/cleaveLand_result/t_plot/nta-MIR169s-p5_XM_016622259.1_454_TPlot.pdf
MSTRG.4389.1:567	nta-miR477a	MSTRG.4389.1	MSTRG.4389	.	0	NA	NA	576	567	0.839623	7	(((((((((...((((((((((((&))))))))))))---)))))))))	CAGGAGCCUCAUUUGAGGGAGAGU&ACUCUCCCUCAA---GGGCUUCUG	1	96.2835	4	0.124903	Output/DS_TL/cleaveLand_result/t_plot/nta-miR477a_MSTRG.4389.1_567_TPlot.pdf
XM_016577300.1:1538	nta-miR172c	XM_016577300.1	107759353	LOC107759353	PREDICTED: AP2-like ethylene-responsive transcription factor TOE3 isoform X1 [Nicotiana tabacum]	GO:0003677(DNA binding);GO:0003700(transcription factor activity, sequence-specific DNA binding);GO:0005634(nucleus);GO:0006351(transcription, DNA-templated);GO:0006355(regulation of transcription, DNA-templated);GO:0009908(flower development);GO:0010073(meristem maintenance);GO:0010093(specification of floral organ identity);GO:0019953(sexual reproduction);GO:0030154(cell differentiation);GO:004…	NA	1547	1538	0.997085	2	.((((((((((((((((((((&)))))))))))))))))))).	CUGCAGCAUCAUCAGGAUUCU&AGAAUCUUGAUGAUGCUGCAU	1	96.2835	4	0.124903	Output/DS_TL/cleaveLand_result/t_plot/nta-miR172c_XM_016577300.1_1538_TPlot.pdf
XM_016600702.1:1604	nta-miR169a_1ss7AG	XM_016600702.1	MSTRG.15841	LOC107780177	PREDICTED: nuclear transcription factor Y subunit A-3-like isoform X1 [Nicotiana tabacum]	GO:0003677(DNA binding);GO:0003700(transcription factor activity, sequence-specific DNA binding);GO:0005634(nucleus);GO:0006351(transcription, DNA-templated);GO:0006355(regulation of transcription, DNA-templated);GO:0016602(CCAAT-binding factor complex);GO:0016602(CCAAT-binding factor complex)	00970(Aminoacyl-tRNA biosynthesis);00970(Aminoacyl-tRNA biosynthesis)	1613	1604	0.763098	3.5	(((((((.((((((((((((.&.)))))))))))).)))))))	UCGGCAGUUCAUCCUUGGCUA&CAGCCAGGGAUGACUUGCCGA	1	96.2835	4	0.124903	Output/DS_TL/cleaveLand_result/t_plot/nta-miR169a_1ss7AG_XM_016600702.1_1604_TPlot.pdf
XM_016608410.1:644	nta-MIR6154a-p5	XM_016608410.1	107786895	LOC107786895	PREDICTED: uncharacterized protein LOC107786895 [Nicotiana tabacum]	GO:0009507(chloroplast);GO:0009534(chloroplast thylakoid);GO:0016491(oxidoreductase activity);GO:0055114(oxidation-reduction process)	NA	654	644	0.730415	7	(((((.(((((((..((((((((.&.))))))))-.)))))))-)))))	GGUGGAAUCUACCCAGGAGUGAGC&CCUUACUCC-AGGUAGAU-CCACC	1	96.2835	4	0.124903	Output/DS_TL/cleaveLand_result/t_plot/nta-MIR6154a-p5_XM_016608410.1_644_TPlot.pdf
XM_016615848.1:198	nta-miR164a	XM_016615848.1	107793475	LOC107793475	PREDICTED: poly(rC)-binding protein 1 isoform X1 [Nicotiana sylvestris]	GO:0003676(nucleic acid binding);GO:0003723(RNA binding);GO:0003723(RNA binding)	NA	207	198	0.817156	3.5	.(((((-(((((((((((((.&.))))))))))))).))))).	GGCACG-GUCCUGCUUCUCCU&UGGAGAAGCAGGGCACGUGCA	1	96.2835	4	0.124903	Output/DS_TL/cleaveLand_result/t_plot/nta-miR164a_XM_016615848.1_198_TPlot.pdf
XM_016635925.1:327	nta-miR827	XM_016635925.1	107811072	LOC107811072	PREDICTED: SPX domain-containing membrane protein At4g22990-like isoform X1 [Nicotiana tabacum]	GO:0005622(intracellular);GO:0005623(cell);GO:0006817(phosphate ion transport);GO:0009705(plant-type vacuole membrane);GO:0016021(integral component of membrane);GO:0055085(transmembrane transport);GO:0055085(transmembrane transport)	NA	336	327	0.823129	3	((((((((((((.((((((((&)))))))).))))))))))))	UGUUUGUUGAUGCUUAUCUAA&UUAGAUGAACAUCAACAAACA	1	96.2835	4	0.124903	Output/DS_TL/cleaveLand_result/t_plot/nta-miR827_XM_016635925.1_327_TPlot.pdf
XM_016636913.1:829	nta-miR396b	XM_016636913.1	107811923	LOC107811923	PREDICTED: BOI-related E3 ubiquitin-protein ligase 1-like isoform X1 [Nicotiana attenuata]	GO:0004842(ubiquitin-protein transferase activity);GO:0005634(nucleus);GO:0005737(cytoplasm);GO:0008270(zinc ion binding);GO:0016567(protein ubiquitination);GO:0031347(regulation of defense response)	NA	838	829	0.883234	4.5	((((((((((((((((.(((.&.))).))))))))))))))))	AAGUUCAGGAAGGCUGCGGAG&UUCCACAGCUUUCUUGAACUU	1	96.2835	4	0.124903	Output/DS_TL/cleaveLand_result/t_plot/nta-miR396b_XM_016636913.1_829_TPlot.pdf
XM_016640664.1:234	nta-miR6020b	XM_016640664.1	107815146	LOC107815146	PREDICTED: TMV resistance protein N-like [Nicotiana tabacum]	GO:0005515(protein binding);GO:0005515(protein binding)	03040(Spliceosome);04141(Protein processing in endoplasmic reticulum);04144(Endocytosis);04144(Endocytosis)	243	234	0.937908	1	((.((((((((((((((((((&)))))))))))))))))).))	GAUGAUACUCGAAGAACAUUU&AAAUGUUCUUCGAGUAUCUUC	1	96.2835	4	0.124903	Output/DS_TL/cleaveLand_result/t_plot/nta-miR6020b_XM_016640664.1_234_TPlot.pdf
XM_016652411.1:736	nta-MIR167a-p3	XM_016652411.1	MSTRG.6586	LOC107825540	PREDICTED: protochlorophyllide reductase, chloroplastic-like isoform X1 [Nicotiana tomentosiformis]	GO:0005515(protein binding);GO:0009507(chloroplast);GO:0009534(chloroplast thylakoid);GO:0009535(chloroplast thylakoid membrane);GO:0009707(chloroplast outer membrane);GO:0009723(response to ethylene);GO:0009941(chloroplast envelope);GO:0015979(photosynthesis);GO:0015995(chlorophyll biosynthetic process);GO:0016020(membrane);GO:0016491(oxidoreductase activity);GO:0016630(protochlorophyllide reduc…	00860(Porphyrin and chlorophyll metabolism);00860(Porphyrin and chlorophyll metabolism)	745	736	0.821918	5	...(..(((((((((((((((&)))))))))))))))..)...	AAGGUUGCUGCUAGAUGACCU&AGGUCAUCUAGCAGCUUCAAU	1	96.2835	4	0.124903	Output/DS_TL/cleaveLand_result/t_plot/nta-MIR167a-p3_XM_016652411.1_736_TPlot.pdf
XR_001652766.1:165	nta-miR6151g	XR_001652766.1	107806825	LOC107806825	0	NA	NA	174	165	0.717762	5.5	((((((.(((((((((.(.((((&)))).).)))))))))-))))))	UCAGUCACAACGCCUCCCUCUCA&UGAGUGUGAGGCGUUG-GAUUGA	3	288.85	3	0.126444	Output/DS_TL/cleaveLand_result/t_plot/nta-miR6151g_XR_001652766.1_165_TPlot.pdf
XM_016587618.1:3385	nta-MIR397-p3	XM_016587618.1	107768490	LOC107768490	PREDICTED: indole-3-acetaldehyde oxidase-like [Nicotiana sylvestris]	GO:0004854(xanthine dehydrogenase activity);GO:0005829(cytosol);GO:0009115(xanthine catabolic process);GO:0016903(oxidoreductase activity, acting on the aldehyde or oxo group of donors);GO:0050660(flavin adenine dinucleotide binding)	00906(Carotenoid biosynthesis)	3394	3385	0.72155	7	....((((.(((((((((((((&))))))))))))).))))....	UCUAUGAGCGCAGUGCAGGUGA&UCAUCUGCGCUGCACUCAAUCA	7	673.984	2	0.131285	Output/DS_TL/cleaveLand_result/t_plot/nta-MIR397-p3_XM_016587618.1_3385_TPlot.pdf
XM_016598965.1:704	nta-miR482b-5p	XM_016598965.1	MSTRG.15359	LOC107778680	PREDICTED: aspartate aminotransferase, cytoplasmic [Nicotiana tomentosiformis]	GO:0004069(L-aspartate:2-oxoglutarate aminotransferase activity);GO:0030170(pyridoxal phosphate binding);GO:0042802(identical protein binding)	01200(Carbon metabolism);01210(2-Oxocarboxylic acid metabolism);01230(Biosynthesis of amino acids);00710(Carbon fixation in photosynthetic organisms);00250(Alanine, aspartate and glutamate metabolism);00270(Cysteine and methionine metabolism);00220(Arginine biosynthesis);00330(Arginine and proline metabolism);00350(Tyrosine metabolism);00360(Phenylalanine metabolism);00400(Phenylalanine, tyrosine…	713	704	0.809769	6	.(((((((((((.((((((((&)))))))).))))))))))).	GAUCUUGCUGCUGCACCCGCU&AGUGGGUGGAGUGGUAAGAUA	4	385.134	2	0.131285	Output/DS_TL/cleaveLand_result/t_plot/nta-miR482b-5p_XM_016598965.1_704_TPlot.pdf
XM_016600206.1:288	nta-MIR6144-p3	XM_016600206.1	MSTRG.15699	LOC107779725	PREDICTED: phospholipase D alpha 1 [Nicotiana tomentosiformis]	GO:0034638(phosphatidylcholine catabolic process);GO:0034638(phosphatidylcholine catabolic process)	00564(Glycerophospholipid metabolism);00565(Ether lipid metabolism);04144(Endocytosis);04144(Endocytosis)	297	288	0.857585	3.5	(((((..((((((((((((((&))))))))))))))..)))))	GGUGGCCACUUCUUCAGCAAG&CUUGUUGAAGAAGUUUCCAUC	2	192.567	2	0.131285	Output/DS_TL/cleaveLand_result/t_plot/nta-MIR6144-p3_XM_016600206.1_288_TPlot.pdf
XM_016605493.1:1674	nta-miR172c	XM_016605493.1	107784366	LOC107784366	PREDICTED: AP2-like ethylene-responsive transcription factor TOE3 isoform X1 [Nicotiana tabacum]	GO:0003677(DNA binding);GO:0003700(transcription factor activity, sequence-specific DNA binding);GO:0005634(nucleus);GO:0006351(transcription, DNA-templated);GO:0006355(regulation of transcription, DNA-templated);GO:0009908(flower development);GO:0010073(meristem maintenance);GO:0010093(specification of floral organ identity);GO:0019953(sexual reproduction);GO:0030154(cell differentiation);GO:004…	NA	1683	1674	0.997085	2	.((((((((((((((((((((&)))))))))))))))))))).	CUGCAGCAUCAUCAGGAUUCU&AGAAUCUUGAUGAUGCUGCAU	2	192.567	2	0.131285	Output/DS_TL/cleaveLand_result/t_plot/nta-miR172c_XM_016605493.1_1674_TPlot.pdf
XM_016646178.1:1398	nta-miR166a	XM_016646178.1	MSTRG.4815	LOC107819982	PREDICTED: homeobox-leucine zipper protein ATHB-14-like isoform X2 [Nicotiana tomentosiformis]	GO:0003677(DNA binding);GO:0003700(transcription factor activity, sequence-specific DNA binding);GO:0005634(nucleus);GO:0006351(transcription, DNA-templated);GO:0006355(regulation of transcription, DNA-templated);GO:0008289(lipid binding);GO:0009855(determination of bilateral symmetry);GO:0009944(polarity specification of adaxial/abaxial axis);GO:0009955(adaxial/abaxial pattern specification);GO:…	NA	1407	1398	0.848073	3.5	..((((((((((((((((((.&.))))))))))))))))))..	UUGGGAUGAAGCCUGGUCCGG&UCGGACCAGGCUUCAUUCCCC	2	192.567	2	0.131285	Output/DS_TL/cleaveLand_result/t_plot/nta-miR166a_XM_016646178.1_1398_TPlot.pdf
XR_001643053.1:1237	nta-miR171c	XR_001643053.1	107763537	LOC107763537	PREDICTED: scarecrow-like protein 6 isoform X1 [Nicotiana tabacum]	GO:0003700(transcription factor activity, sequence-specific DNA binding);GO:0005634(nucleus);GO:0006355(regulation of transcription, DNA-templated);GO:0030154(cell differentiation);GO:0043565(sequence-specific DNA binding);GO:0043565(sequence-specific DNA binding)	04075(Plant hormone signal transduction);04075(Plant hormone signal transduction)	1246	1237	1	1	(((((((((((((((((((((&)))))))))))))))))))))	GAUAUUGGCGCGGCUCAAUCA&UGAUUGAGCCGUGCCAAUAUC	3	288.85	2	0.131285	Output/DS_TL/cleaveLand_result/t_plot/nta-miR171c_XR_001643053.1_1237_TPlot.pdf
MSTRG.19641.1:734	nta-MIR167e-p3	MSTRG.19641.1	MSTRG.19641	TRNAL-AAG	0	NA	NA	742	734	0.780488	4	((((((((((((((-(((((&))))).))))))))))))))	GGUGGUGUUGUUAC-UGAUC&GAUCAUGUAGCAGCAUCACC	2	192.567	3	0.131351	Output/DS_TL/cleaveLand_result/t_plot/nta-MIR167e-p3_MSTRG.19641.1_734_TPlot.pdf
XM_016628525.1:701	nta-MIR6161c-p3_1ss7AG	XM_016628525.1	MSTRG.23517	LOC107804602	PREDICTED: threonine dehydratase biosynthetic, chloroplastic [Nicotiana tomentosiformis]	GO:0004794(L-threonine ammonia-lyase activity);GO:0005737(cytoplasm);GO:0009097(isoleucine biosynthetic process);GO:0030170(pyridoxal phosphate binding)	01200(Carbon metabolism);01230(Biosynthesis of amino acids);00260(Glycine, serine and threonine metabolism);00290(Valine, leucine and isoleucine biosynthesis)	711	701	0.698901	6.5	.(((((((.-((((((((.((((((&))))))-))))))))..))))))).	AGCUGGAAA-UCAUGCACAAGGUGU&GCACCU-GUGUAUGAACUUCCAGCA	2	192.567	3	0.131351	Output/DS_TL/cleaveLand_result/t_plot/nta-MIR6161c-p3_1ss7AG_XM_016628525.1_701_TPlot.pdf
XM_016660648.1:1232	nta-MIR827-p5	XM_016660648.1	MSTRG.875	LOC107832769	PREDICTED: ruBisCO large subunit-binding protein subunit alpha-like [Nicotiana tabacum]	GO:0005524(ATP binding);GO:0005739(mitochondrion);GO:0005829(cytosol);GO:0006457(protein folding);GO:0009507(chloroplast);GO:0009570(chloroplast stroma);GO:0009579(thylakoid);GO:0009658(chloroplast organization);GO:0009793(embryo development ending in seed dormancy);GO:0009941(chloroplast envelope);GO:0016020(membrane);GO:0022626(cytosolic ribosome);GO:0042026(protein refolding);GO:0048046(apopla…	03018(RNA degradation)	1241	1232	0.780952	4	(((-(((((((((((((((((&))))))))))))))))).)))	GAA-AGGUGACCAUUAGCAAG&UUUGUUGAUGGUCAUCUAUUC	5	481.417	3	0.131351	Output/DS_TL/cleaveLand_result/t_plot/nta-MIR827-p5_XM_016660648.1_1232_TPlot.pdf
XM_016614755.1:82	nta-MIR6158b-p3	XM_016614755.1	MSTRG.19747	LOC107792531	PREDICTED: 60S ribosomal protein L31 [Nicotiana tomentosiformis]	GO:0002181(cytoplasmic translation);GO:0003735(structural constituent of ribosome);GO:0022625(cytosolic large ribosomal subunit)	03010(Ribosome)	91	82	0.683652	6	.(((((.((.(((((((((((((&)))))))))))))-)).))))).	UCUCCACUGUUCGGCCCGCUCGG&UUGAGCGGGUCGG-CACUGGAGU	3	288.85	3	0.13623	Output/DS_TL/cleaveLand_result/t_plot/nta-MIR6158b-p3_XM_016614755.1_82_TPlot.pdf
XM_016591354.1:81	nta-MIR6158b-p3	XM_016591354.1	MSTRG.1316	LOC107771890	PREDICTED: 60S ribosomal protein L31 [Nicotiana tomentosiformis]	GO:0002181(cytoplasmic translation);GO:0003735(structural constituent of ribosome);GO:0022625(cytosolic large ribosomal subunit)	03010(Ribosome)	90	81	0.683652	6	.(((((.((.(((((((((((((&)))))))))))))-)).))))).	UCUCCACUGUUCGGCCCGCUCGG&UUGAGCGGGUCGG-CACUGGAGU	5	481.417	3	0.141082	Output/DS_TL/cleaveLand_result/t_plot/nta-MIR6158b-p3_XM_016591354.1_81_TPlot.pdf
XM_016620378.1:386	nta-MIR6164b-p5	XM_016620378.1	MSTRG.21299	LOC107797479	PREDICTED: GDP-mannose 3,5-epimerase 1 [Nicotiana tomentosiformis]	GO:0003824(catalytic activity);GO:0005737(cytoplasm);GO:0005829(cytosol);GO:0009225(nucleotide-sugar metabolic process);GO:0019853(L-ascorbic acid biosynthetic process);GO:0047918(GDP-mannose 3,5-epimerase activity);GO:0051287(NAD binding);GO:0051287(NAD binding)	00053(Ascorbate and aldarate metabolism);00520(Amino sugar and nucleotide sugar metabolism);00520(Amino sugar and nucleotide sugar metabolism)	395	386	0.686649	5.5	((((((((((.(((((.(((((((&))))))).))))).))))))))))	GGUUAUGGAUAAUUGCUUGAAGGU&ACCUUUAUGCAAUGAUUUAUAGCC	2	192.567	3	0.141082	Output/DS_TL/cleaveLand_result/t_plot/nta-MIR6164b-p5_XM_016620378.1_386_TPlot.pdf
MSTRG.14136.2:3312	nta-miR167a_L+1R-1	MSTRG.14136.2	MSTRG.14136	LOC107774783	PREDICTED: auxin response factor 6-like isoform X3 [Nicotiana tomentosiformis]	GO:0003677(DNA binding);GO:0003700(transcription factor activity, sequence-specific DNA binding);GO:0005515(protein binding);GO:0005634(nucleus);GO:0006351(transcription, DNA-templated);GO:0006355(regulation of transcription, DNA-templated);GO:0009733(response to auxin);GO:0009734(auxin-activated signaling pathway);GO:0009908(flower development)	04075(Plant hormone signal transduction)	3321	3312	0.754854	7	.((((((.(((((((((((...&...))))))))))).)))))).	GAGAUCAGGCUGGCAGCUUGUA&UUGAAGCUGCCAGCAUGAUCUG	2	192.567	2	0.142329	Output/DS_TL/cleaveLand_result/t_plot/nta-miR167a_L+1R-1_MSTRG.14136.2_3312_TPlot.pdf
MSTRG.24455.2:1433	nta-miR171b	MSTRG.24455.2	MSTRG.24455	LOC107807449	PREDICTED: scarecrow-like protein 22 [Nicotiana tabacum]	GO:0003700(transcription factor activity, sequence-specific DNA binding);GO:0005634(nucleus);GO:0006355(regulation of transcription, DNA-templated);GO:0030154(cell differentiation);GO:0043565(sequence-specific DNA binding)	04075(Plant hormone signal transduction)	1442	1433	0.918782	2	..(((((((((((((((((((&)))))))))))))))))))..	AAUGAUAUUGGCGCGGCUCAA&UUGAGCCGCGCCAAUAUCACU	10	962.835	2	0.142329	Output/DS_TL/cleaveLand_result/t_plot/nta-miR171b_MSTRG.24455.2_1433_TPlot.pdf
XM_016584329.1:822	nta-miR164a	XM_016584329.1	107765662	LOC107765662	PREDICTED: NAC domain-containing protein 100 isoform X1 [Nicotiana sylvestris]	GO:0003677(DNA binding);GO:0003700(transcription factor activity, sequence-specific DNA binding);GO:0005634(nucleus);GO:0006351(transcription, DNA-templated);GO:0006355(regulation of transcription, DNA-templated);GO:0007275(multicellular organism development);GO:0007275(multicellular organism development)	03018(RNA degradation);03018(RNA degradation)	831	822	0.769752	4	.(.(((((((.(((((((((((&))))))))))).)))))))-).	AGCCACGUGCACUGCUUCUCCA&UGGAGAAGCAGGGCACGUG-CA	2	192.567	2	0.142329	Output/DS_TL/cleaveLand_result/t_plot/nta-miR164a_XM_016584329.1_822_TPlot.pdf
XM_016602757.1:611	nta-MIR6149a-p3	XM_016602757.1	107781938	LOC107781938	PREDICTED: uncharacterized protein LOC107781938 [Nicotiana tabacum]	GO:0003674(molecular_function);GO:0008150(biological_process);GO:0009507(chloroplast);GO:0016021(integral component of membrane)	NA	621	611	0.74221	5	((((((.((((((.(((((((.&.)))))))-)))))).))))))	GUUUGACACGGACUCCAAACCC&CGGUUUGG-GUUCGUAUCAAAC	3	288.85	2	0.142329	Output/DS_TL/cleaveLand_result/t_plot/nta-MIR6149a-p3_XM_016602757.1_611_TPlot.pdf
XM_016605825.1:407	nta-miR6024	XM_016605825.1	107784671	LOC107784671	PREDICTED: putative late blight resistance protein homolog R1B-12 [Nicotiana tabacum]	GO:0005524(ATP binding);GO:0005634(nucleus);GO:0005737(cytoplasm);GO:0005886(plasma membrane);GO:0006952(defense response);GO:0009626(plant-type hypersensitive response);GO:0009814(defense response, incompatible interaction);GO:0043531(ADP binding);GO:0043531(ADP binding)	04626(Plant-pathogen interaction);04626(Plant-pathogen interaction)	416	407	0.789474	3	((.(((((((((((((((((((&))))))))))))))))))).))	GGCAAAACAACUUUGGCUAGAA&UUUUAGCCAGAGUUGUUUUCCC	3	288.85	2	0.142329	Output/DS_TL/cleaveLand_result/t_plot/nta-miR6024_XM_016605825.1_407_TPlot.pdf
XM_016624149.1:147	nta-miR6020a-5p	XM_016624149.1	#N/A	#N/A	#N/A	#N/A	#N/A	156	147	1	1	(((((((((((((((((((((&)))))))))))))))))))))	GAAGAUACUCGGAAAACAUUU&AAAUGUUUUUCGAGUAUCUUC	3	288.85	2	0.142329	Output/DS_TL/cleaveLand_result/t_plot/nta-miR6020a-5p_XM_016624149.1_147_TPlot.pdf
XM_016636437.1:1145	nta-miR399a	XM_016636437.1	MSTRG.25683	LOC107811493	PREDICTED: probable ubiquitin-conjugating enzyme E2 24 [Nicotiana tabacum]	GO:0005737(cytoplasm);GO:0031625(ubiquitin protein ligase binding);GO:0061630(ubiquitin protein ligase activity);GO:0061630(ubiquitin protein ligase activity)	04120(Ubiquitin mediated proteolysis);04120(Ubiquitin mediated proteolysis)	1154	1145	0.758315	3.5	(((((((..(((((((((((.&.)))))))))))..)))))))	UAGGGCAAAUCUCCUUUGGCA&CGCCAAAGGAGAGCUGCCCUG	2	192.567	2	0.142329	Output/DS_TL/cleaveLand_result/t_plot/nta-miR399a_XM_016636437.1_1145_TPlot.pdf
XM_016643521.1:1047	nta-MIR166f-p5	XM_016643521.1	MSTRG.4083	LOC107817653	hypothetical protein CICLE_v10013834mg [Citrus clementina];PREDICTED: S-adenosylmethionine decarboxylase proenzyme-like [Nicotiana tabacum]	GO:0004014(adenosylmethionine decarboxylase activity);GO:0005829(cytosol);GO:0006597(spermine biosynthetic process);GO:0008295(spermidine biosynthetic process);GO:0008295(spermidine biosynthetic process)	00270(Cysteine and methionine metabolism);00330(Arginine and proline metabolism);00330(Arginine and proline metabolism)	1055	1047	0.726804	5.5	((((((((((((((((-((((&)))).))))))))))))))))	GUUUCGAGCCAGAUGA-GUUC&GAAUGUUGUCUGGCUCGAAGC	4	385.134	2	0.142329	Output/DS_TL/cleaveLand_result/t_plot/nta-MIR166f-p5_XM_016643521.1_1047_TPlot.pdf
XR_001658459.1:305	nta-MIR6160-p3_1ss12TC	XR_001658459.1	MSTRG.840	LOC107831913	hypothetical protein GLYMA_13G015300 [Glycine max]	NA	NA	315	305	0.718676	5.5	.((((((((-(((((((((((.(((&)))-))))))))))).)))))))).	AGGUCUGUG-AUGCCCUUAGAUGUU&AAC-UCUAAGGGCAUAUAUGGACCA	142	13672.3	2	0.142329	Output/DS_TL/cleaveLand_result/t_plot/nta-MIR6160-p3_1ss12TC_XR_001658459.1_305_TPlot.pdf
MSTRG.4350.1:559	nta-MIR6160-p3_1ss12TC	MSTRG.4350.1	MSTRG.4350	.	0	NA	NA	569	559	0.718676	5.5	.((((((((-(((((((((((.(((&)))-))))))))))).)))))))).	AGGUCUGUG-AUGCCCUUAGAUGUU&AAC-UCUAAGGGCAUAUAUGGACCA	1	96.2835	4	0.144148	Output/DS_TL/cleaveLand_result/t_plot/nta-MIR6160-p3_1ss12TC_MSTRG.4350.1_559_TPlot.pdf
XM_016601950.1:1536	nta-miR164c	XM_016601950.1	107781265	LOC107781265	PREDICTED: uncharacterized protein LOC107781265 [Nicotiana tabacum]	GO:0016787(hydrolase activity)	NA	1545	1536	0.846154	3.5	(((((((((((.(((((((((&))))))))).)))))))))))	GGCAUGUGCCCAGCUUCUUCA&UGGAGAAGCAGGGCACAUGCU	1	96.2835	4	0.144148	Output/DS_TL/cleaveLand_result/t_plot/nta-miR164c_XM_016601950.1_1536_TPlot.pdf
XM_016605157.1:138	nta-miR6149a	XM_016605157.1	107784091	LOC107784091	PREDICTED: F-box protein CPR30-like [Nicotiana sylvestris]	GO:0003674(molecular_function);GO:0005634(nucleus);GO:0008150(biological_process)	00970(Aminoacyl-tRNA biosynthesis)	147	138	0.779487	3	(((-(((.((((((((((((((&))))))))))))))-))).)))	GCC-AUUACAGGUGCGUGUCAA&UUGAUACGCACCUG-AAUCGGC	1	96.2835	4	0.144148	Output/DS_TL/cleaveLand_result/t_plot/nta-miR6149a_XM_016605157.1_138_TPlot.pdf
XM_016628136.1:2221	nta-MIR398-p5	XM_016628136.1	107804274	LOC107804274	PREDICTED: receptor-like serine/threonine-protein kinase NCRK isoform X1 [Nicotiana tabacum]	GO:0004674(protein serine/threonine kinase activity);GO:0005524(ATP binding);GO:0005768(endosome);GO:0005886(plasma membrane);GO:0006468(protein phosphorylation);GO:0010008(endosome membrane);GO:0010089(xylem development);GO:0012505(endomembrane system);GO:0016021(integral component of membrane);GO:0016301(kinase activity);GO:0031902(late endosome membrane);GO:0051020(GTPase binding);GO:0051020(G…	04626(Plant-pathogen interaction);04626(Plant-pathogen interaction)	2231	2221	0.776942	6	((((((((((((((.(((((..&..)))))-))))))))))))))	CGUGUGGUCUCAGAGUUGCCAG&GGGGCAA-UCUGAGAUCACAUG	1	96.2835	4	0.144148	Output/DS_TL/cleaveLand_result/t_plot/nta-MIR398-p5_XM_016628136.1_2221_TPlot.pdf
XM_016649213.1:1531	nta-miR156g_L+1	XM_016649213.1	107822648	LOC107822648	PREDICTED: squamosa promoter-binding-like protein 12 isoform X3 [Nicotiana tabacum]	GO:0003677(DNA binding);GO:0003700(transcription factor activity, sequence-specific DNA binding);GO:0005634(nucleus);GO:0006351(transcription, DNA-templated);GO:0006355(regulation of transcription, DNA-templated);GO:0044212(transcription regulatory region DNA binding);GO:0046872(metal ion binding);GO:0048510(regulation of timing of transition from vegetative to reproductive phase);GO:0048653(anth…	01210(2-Oxocarboxylic acid metabolism);01230(Biosynthesis of amino acids);00220(Arginine biosynthesis);00220(Arginine biosynthesis)	1540	1531	0.931129	2	(((((((((.(((((((((((&))))))))))).)))))))))	GUGCUCUCUCUCUUCUGUCAA&UUGACAGAAGAUAGAGAGCAC	1	96.2835	4	0.144148	Output/DS_TL/cleaveLand_result/t_plot/nta-miR156g_L+1_XM_016649213.1_1531_TPlot.pdf
XM_016620379.1:359	nta-MIR6164b-p5	XM_016620379.1	MSTRG.21299	LOC107797479	PREDICTED: GDP-mannose 3,5-epimerase 1 [Nicotiana tomentosiformis]	GO:0003824(catalytic activity);GO:0005737(cytoplasm);GO:0005829(cytosol);GO:0009225(nucleotide-sugar metabolic process);GO:0019853(L-ascorbic acid biosynthetic process);GO:0047918(GDP-mannose 3,5-epimerase activity);GO:0051287(NAD binding);GO:0051287(NAD binding)	00053(Ascorbate and aldarate metabolism);00520(Amino sugar and nucleotide sugar metabolism);00520(Amino sugar and nucleotide sugar metabolism)	368	359	0.686649	5.5	((((((((((.(((((.(((((((&))))))).))))).))))))))))	GGUUAUGGAUAAUUGCUUGAAGGU&ACCUUUAUGCAAUGAUUUAUAGCC	2	192.567	3	0.145906	Output/DS_TL/cleaveLand_result/t_plot/nta-MIR6164b-p5_XM_016620379.1_359_TPlot.pdf
MSTRG.21232.1:334	nta-MIR6160-p3_1ss12TC	MSTRG.21232.1	MSTRG.21232	.	0	NA	NA	344	334	0.718676	5.5	.((((((((-(((((((((((.(((&)))-))))))))))).)))))))).	AGGUCUGUG-AUGCCCUUAGAUGUU&AAC-UCUAAGGGCAUAUAUGGACCA	149	14346.2	2	0.153233	Output/DS_TL/cleaveLand_result/t_plot/nta-MIR6160-p3_1ss12TC_MSTRG.21232.1_334_TPlot.pdf
XM_016580048.1:3105	nta-miR167d	XM_016580048.1	MSTRG.9878	LOC107761773	PREDICTED: auxin response factor 6-like isoform X2 [Nicotiana tabacum]	GO:0003677(DNA binding);GO:0003700(transcription factor activity, sequence-specific DNA binding);GO:0005515(protein binding);GO:0005634(nucleus);GO:0006351(transcription, DNA-templated);GO:0006355(regulation of transcription, DNA-templated);GO:0009733(response to auxin);GO:0009734(auxin-activated signaling pathway);GO:0009908(flower development);GO:0009908(flower development)	04075(Plant hormone signal transduction);04075(Plant hormone signal transduction)	3114	3105	0.796915	5	.((((((.(((((((((((..&..))))))))))).)))))).	GAGAUCAGGCUGGCAGCUUGU&UGAAGCUGCCAGCAUGAUCUA	2	192.567	2	0.153233	Output/DS_TL/cleaveLand_result/t_plot/nta-miR167d_XM_016580048.1_3105_TPlot.pdf
XM_016644581.1:148	nta-miR6020a-5p	XM_016644581.1	MSTRG.4361	LOC107818550	PREDICTED: TMV resistance protein N-like [Nicotiana sylvestris]	GO:0005515(protein binding);GO:0005515(protein binding)	03040(Spliceosome);04141(Protein processing in endoplasmic reticulum);04144(Endocytosis);04144(Endocytosis)	157	148	1	1	(((((((((((((((((((((&)))))))))))))))))))))	GAAGAUACUCGGAAAACAUUU&AAAUGUUUUUCGAGUAUCUUC	3	288.85	2	0.153233	Output/DS_TL/cleaveLand_result/t_plot/nta-miR6020a-5p_XM_016644581.1_148_TPlot.pdf
XM_016647821.1:1371	nta-miR166a	XM_016647821.1	MSTRG.5270	LOC107821381	homeobox-leucine zipper protein ATHB-14-like [Nicotiana sylvestris]	GO:0003677(DNA binding);GO:0003700(transcription factor activity, sequence-specific DNA binding);GO:0005634(nucleus);GO:0006351(transcription, DNA-templated);GO:0006355(regulation of transcription, DNA-templated);GO:0008289(lipid binding);GO:0009855(determination of bilateral symmetry);GO:0009944(polarity specification of adaxial/abaxial axis);GO:0009955(adaxial/abaxial pattern specification);GO:…	NA	1380	1371	0.848073	3.5	..((((((((((((((((((.&.))))))))))))))))))..	UUGGGAUGAAGCCUGGUCCGG&UCGGACCAGGCUUCAUUCCCC	3	288.85	2	0.153233	Output/DS_TL/cleaveLand_result/t_plot/nta-miR166a_XM_016647821.1_1371_TPlot.pdf
MSTRG.13553.1:509	nta-miR6020a-5p	MSTRG.13553.1	MSTRG.13553	.	0	NA	NA	518	509	0.688172	4.5	.((((..((((((((((((((((&))))))))))))))))--)))).	AAGGAACUACUUGAAAAACAUUU&AAAUGUUUUUCGAGUA--UCUUC	7	673.984	1	0.153467	Output/DS_TL/cleaveLand_result/t_plot/nta-miR6020a-5p_MSTRG.13553.1_509_TPlot.pdf
MSTRG.3803.2:257	nta-MIR167c-p3	MSTRG.3803.2	MSTRG.3803	LOC107816805	PREDICTED: glycine-rich cell wall structural protein 1.8-like [Nicotiana tabacum]	NA	NA	265	257	0.794521	6.5	..(((((((((-((((((((.&.)))))))).)))))))))..	UAUGGAGCUGC-AGGUGACCA&AGGUCAUCUAGCAGCUUCAAU	2	192.567	3	0.155474	Output/DS_TL/cleaveLand_result/t_plot/nta-MIR167c-p3_MSTRG.3803.2_257_TPlot.pdf
XM_016593283.1:901	nta-miR6145e_R+1	XM_016593283.1	MSTRG.1377	LOC107773854	PREDICTED: surfeit locus protein 2-like [Nicotiana tabacum]	GO:0003674(molecular_function);GO:0005634(nucleus);GO:0008150(biological_process)	NA	909	901	0.731183	5	((.(((((((((((((-((((((&)))))).)))))))))))))-))	AGACCAGUGCUACAUG-AAUGAU&AUUGUUACAUGUAGCACUGG-CU	2	192.567	3	0.155474	Output/DS_TL/cleaveLand_result/t_plot/nta-miR6145e_R+1_XM_016593283.1_901_TPlot.pdf
MSTRG.23832.2:3377	nta-miR396b	MSTRG.23832.2	MSTRG.23832	LOC107805552	PREDICTED: cellulose synthase-like protein D3 [Nicotiana tomentosiformis]	GO:0000271(polysaccharide biosynthetic process);GO:0005768(endosome);GO:0005794(Golgi apparatus);GO:0005802(trans-Golgi network);GO:0005886(plasma membrane);GO:0009409(response to cold);GO:0009832(plant-type cell wall biogenesis);GO:0016757(transferase activity, transferring glycosyl groups);GO:0016759(cellulose synthase activity);GO:0016760(cellulose synthase (UDP-forming) activity);GO:0030173(i…	00500(Starch and sucrose metabolism);00520(Amino sugar and nucleotide sugar metabolism)	3386	3377	0.706587	6.5	(((((.(((-(((((((((((&))))))))))).))).)))))	GAGUUGGAG-GAGUUGUGGAG&UUCCACAGCUUUCUUGAACUU	3	288.85	1	0.159712	Output/DS_TL/cleaveLand_result/t_plot/nta-miR396b_MSTRG.23832.2_3377_TPlot.pdf
XM_016638002.1:712	nta-MIR827-p5	XM_016638002.1	MSTRG.26071	LOC107812832	PREDICTED: GDP-L-galactose phosphorylase 1-like [Nicotiana tomentosiformis]	GO:0005737(cytoplasm);GO:0006006(glucose metabolic process);GO:0080048(GDP-D-glucose phosphorylase activity)	00053(Ascorbate and aldarate metabolism)	721	712	0.761905	7	(((((((..(((((((((((((&)))))))))))))-.)))))))	GAAUGGGAGGAUCGUCAGCAGA&UUUGUUGAUGGUC-AUCUAUUC	2	192.567	3	0.160217	Output/DS_TL/cleaveLand_result/t_plot/nta-MIR827-p5_XM_016638002.1_712_TPlot.pdf
XM_016652969.1:284	nta-MIR167a-p3	XM_016652969.1	#N/A	#N/A	#N/A	#N/A	#N/A	292	284	0.794521	6.5	..(((((((((-((((((((.&.)))))))).)))))))))..	UAUGGAGCUGC-AGGUGACCA&AGGUCAUCUAGCAGCUUCAAU	2	192.567	3	0.160217	Output/DS_TL/cleaveLand_result/t_plot/nta-MIR167a-p3_XM_016652969.1_284_TPlot.pdf
XM_016579675.1:393	nta-MIR396c-p3	XM_016579675.1	MSTRG.9743	LOC107761457	PREDICTED: peroxisome biogenesis factor 10-like [Nicotiana sylvestris]	GO:0005829(cytosol);GO:0008270(zinc ion binding);GO:0061630(ubiquitin protein ligase activity);GO:0071215(cellular response to abscisic acid stimulus);GO:1902584(positive regulation of response to water deprivation)	NA	402	393	0.849231	4.5	((((((((((((((((((..&..))))))))))))))))))	UUUCCUACGGCUUUCUUGCU&UUCAAGAAAGCUGUGGGAAA	1	96.2835	4	0.162969	Output/DS_TL/cleaveLand_result/t_plot/nta-MIR396c-p3_XM_016579675.1_393_TPlot.pdf
XM_016589110.1:385	nta-miR169t_R-1_1ss8GT	XM_016589110.1	MSTRG.12379	LOC107769853	PREDICTED: cleavage and polyadenylation specificity factor subunit 3-II [Nicotiana sylvestris]	GO:0043161(proteasome-mediated ubiquitin-dependent protein catabolic process);GO:0061630(ubiquitin protein ligase activity)	03013(RNA transport)	394	385	0.789802	7	((((.....(((((((((((((((&)))))))))))))))----.))))	GGGCCCGUCAGUCAUCGUUGGCUG&UAGCCAAUGAUGACU----UGCCU	1	96.2835	4	0.162969	Output/DS_TL/cleaveLand_result/t_plot/nta-miR169t_R-1_1ss8GT_XM_016589110.1_385_TPlot.pdf
XM_016608054.1:895	nta-miR394	XM_016608054.1	MSTRG.17866	LOC107786562	PREDICTED: eukaryotic translation initiation factor 3 subunit I-like [Nicotiana tomentosiformis]	GO:0000166(nucleotide binding);GO:0001731(formation of translation preinitiation complex);GO:0003743(translation initiation factor activity);GO:0005737(cytoplasm);GO:0005852(eukaryotic translation initiation factor 3 complex);GO:0006446(regulation of translational initiation);GO:0009506(plasmodesma);GO:0016282(eukaryotic 43S preinitiation complex);GO:0033290(eukaryotic 48S preinitiation complex);…	03013(RNA transport)	904	895	0.813776	7	((((((((.(((((((((..&..))))))))).))))))))	GGAGGUGGUCAGGAUGCUUC&UUGGCAUUCUGUCCACCUCC	1	96.2835	4	0.162969	Output/DS_TL/cleaveLand_result/t_plot/nta-miR394_XM_016608054.1_895_TPlot.pdf
XM_016635962.1:2151	nta-MIR6021-p3	XM_016635962.1	MSTRG.25568	LOC107811094	PREDICTED: 5-methyltetrahydropteroyltriglutamate--homocysteine methyltransferase-like [Nicotiana sylvestris]	GO:0003871(5-methyltetrahydropteroyltriglutamate-homocysteine S-methyltransferase activity);GO:0005576(extracellular region);GO:0005829(cytosol);GO:0008705(methionine synthase activity);GO:0050667(homocysteine metabolic process);GO:0050667(homocysteine metabolic process)	01230(Biosynthesis of amino acids);00270(Cysteine and methionine metabolism);00450(Selenocompound metabolism);00450(Selenocompound metabolism)	2160	2151	0.767677	5.5	(((((((((((((.(.(((((&))))).).)))))))))))))	GGGAGGGAGUGAAGUAUGGUG&CAUCACAGUUCACUCCUUCCC	1	96.2835	4	0.162969	Output/DS_TL/cleaveLand_result/t_plot/nta-MIR6021-p3_XM_016635962.1_2151_TPlot.pdf
XM_016656555.1:557	nta-MIR6161c-p3_1ss7AG	XM_016656555.1	MSTRG.7794	LOC107829116	PREDICTED: lanC-like protein GCL2 [Nicotiana sylvestris]	GO:0003824(catalytic activity);GO:0019898(extrinsic component of membrane);GO:0046872(metal ion binding)	NA	567	557	0.751648	7	.(((((-(((((((((((.((((((&))))))-))))))))))).))))).	AGCUGG-GGUUUGUGCACUAGGUGC&GCACCU-GUGUAUGAACUUCCAGCA	1	96.2835	4	0.162969	Output/DS_TL/cleaveLand_result/t_plot/nta-MIR6161c-p3_1ss7AG_XM_016656555.1_557_TPlot.pdf
XM_016599562.1:395	nta-miR395a	XM_016599562.1	107779193	LOC107779193	PREDICTED: phosphoinositide phosphatase SAC2 isoform X1 [Nicotiana tomentosiformis]	GO:0004439(phosphatidylinositol-4,5-bisphosphate 5-phosphatase activity);GO:0005634(nucleus);GO:0005774(vacuolar membrane);GO:0007033(vacuole organization);GO:0036092(phosphatidylinositol-3-phosphate biosynthetic process);GO:0042578(phosphoric ester hydrolase activity);GO:0042578(phosphoric ester hydrolase activity)	03010(Ribosome);03010(Ribosome)	404	395	0.772379	5	((((((((((((.((((((((&)))))))).))))))))))))	GAGUUCUUCCGAUCGCUUCAG&CUGAAGUGUUUGGGGGAACUC	2	192.567	2	0.163998	Output/DS_TL/cleaveLand_result/t_plot/nta-miR395a_XM_016599562.1_395_TPlot.pdf
XM_016604257.1:2661	nta-miR479b	XM_016604257.1	MSTRG.16846	LOC107783281	PREDICTED: uncharacterized protein LOC107783281 [Nicotiana tabacum]	GO:0000070(mitotic sister chromatid segregation);GO:0000212(meiotic spindle organization);GO:0003674(molecular_function);GO:0005634(nucleus);GO:0009793(embryo development ending in seed dormancy);GO:0010789(meiotic sister chromatid cohesion involved in meiosis I);GO:0045132(meiotic chromosome segregation)	NA	2670	2661	0.750708	7	((.((((((((((((((((((.&.)))))))))))))))))).))	GGAGAGCCAGACAGAUGUUAUC&CGUGAUAUUUGUUUGGCUCAUC	3	288.85	2	0.163998	Output/DS_TL/cleaveLand_result/t_plot/nta-miR479b_XM_016604257.1_2661_TPlot.pdf
XM_016616158.1:939	nta-miR6149a	XM_016616158.1	MSTRG.20156	LOC107793743	PREDICTED: endoribonuclease Dicer homolog 1 [Nicotiana sylvestris]	GO:0003723(RNA binding);GO:0004525(ribonuclease III activity);GO:0005634(nucleus);GO:0005737(cytoplasm);GO:0016442(RISC complex);GO:0030422(production of siRNA involved in RNA interference)	03008(Ribosome biogenesis in eukaryotes)	948	939	0.741026	5	.(((((((((((.(((((((.&.))))))).))))))))))).	ACCGAUUCAGGUUCGUAUCGU&UUGAUACGCACCUGAAUCGGC	2	192.567	2	0.163998	Output/DS_TL/cleaveLand_result/t_plot/nta-miR6149a_XM_016616158.1_939_TPlot.pdf
XM_016632624.1:1028	nta-miR166a	XM_016632624.1	MSTRG.24677	LOC107808135	PREDICTED: homeobox-leucine zipper protein ATHB-15-like [Nicotiana tabacum]	GO:0003677(DNA binding);GO:0003700(transcription factor activity, sequence-specific DNA binding);GO:0005634(nucleus);GO:0006351(transcription, DNA-templated);GO:0006355(regulation of transcription, DNA-templated);GO:0008289(lipid binding);GO:0009855(determination of bilateral symmetry);GO:0009887(organ morphogenesis);GO:0009965(leaf morphogenesis);GO:0010014(meristem initiation);GO:0010073(merist…	NA	1037	1028	0.848073	3.5	..((((((((((((((((((.&.))))))))))))))))))..	CUGGGAUGAAGCCUGGUCCGG&UCGGACCAGGCUUCAUUCCCC	4	385.134	2	0.163998	Output/DS_TL/cleaveLand_result/t_plot/nta-miR166a_XM_016632624.1_1028_TPlot.pdf
XM_016633118.1:737	nta-MIR6025b-p5	XM_016633118.1	MSTRG.24814	LOC107808597	PREDICTED: GATA transcription factor 8-like [Nicotiana tomentosiformis]	GO:0000977(RNA polymerase II regulatory region sequence-specific DNA binding);GO:0001085(RNA polymerase II transcription factor binding);GO:0001228(transcriptional activator activity, RNA polymerase II transcription regulatory region sequence-specific binding);GO:0003682(chromatin binding);GO:0005634(nucleus);GO:0005667(transcription factor complex);GO:0030154(cell differentiation)	NA	748	737	0.764045	6.5	.(((((((((((..(((((((((&)))))))))--))))))))))).	AAUGCCAGCAUUGCGAGAUAACA&UGUUAUCUC--AGUGUUGGCAUG	4	385.134	2	0.163998	Output/DS_TL/cleaveLand_result/t_plot/nta-MIR6025b-p5_XM_016633118.1_737_TPlot.pdf
XM_016641178.1:460	nta-MIR6149b-p3	XM_016641178.1	MSTRG.3399	LOC107815568	PREDICTED: pentatricopeptide repeat-containing protein At5g25630-like isoform X1 [Nicotiana tabacum]	GO:0004672(protein kinase activity);GO:0005524(ATP binding);GO:0005739(mitochondrion);GO:0006468(protein phosphorylation);GO:0006468(protein phosphorylation)	NA	469	460	0.722222	6	...(((((((((((((((((.&.)))))))))))))))))...	AAAUGGUAUGAAUCCAGAUCC&CGAUCUGGGUUCGUAUCAAAC	2	192.567	2	0.163998	Output/DS_TL/cleaveLand_result/t_plot/nta-MIR6149b-p3_XM_016641178.1_460_TPlot.pdf
XR_001643051.1:1237	nta-miR171c	XR_001643051.1	107763537	LOC107763537	PREDICTED: scarecrow-like protein 6 isoform X1 [Nicotiana tabacum]	GO:0003700(transcription factor activity, sequence-specific DNA binding);GO:0005634(nucleus);GO:0006355(regulation of transcription, DNA-templated);GO:0030154(cell differentiation);GO:0043565(sequence-specific DNA binding);GO:0043565(sequence-specific DNA binding)	04075(Plant hormone signal transduction);04075(Plant hormone signal transduction)	1246	1237	1	1	(((((((((((((((((((((&)))))))))))))))))))))	GAUAUUGGCGCGGCUCAAUCA&UGAUUGAGCCGUGCCAAUAUC	7	673.984	2	0.163998	Output/DS_TL/cleaveLand_result/t_plot/nta-miR171c_XR_001643051.1_1237_TPlot.pdf
XM_016640586.1:1387	nta-MIR477a-p3	XM_016640586.1	MSTRG.3210	LOC107815070	PREDICTED: D-glycerate 3-kinase, chloroplastic [Nicotiana sylvestris]	GO:0004849(uridine kinase activity);GO:0005829(cytosol);GO:0006206(pyrimidine nucleobase metabolic process);GO:0043097(pyrimidine nucleoside salvage)	01200(Carbon metabolism);00630(Glyoxylate and dicarboxylate metabolism);00561(Glycerolipid metabolism);00260(Glycine, serine and threonine metabolism)	1396	1387	0.721698	5	((((.(((.((((.((((((((((&))))))))))-))))-))).))))	CCACACUCUACUCAGAAGGACCUC&GAGGUCUUUC-GAGU-GAGAGUGG	2	192.567	3	0.164934	Output/DS_TL/cleaveLand_result/t_plot/nta-MIR477a-p3_XM_016640586.1_1387_TPlot.pdf
XM_016652970.1:273	nta-MIR167a-p3	XM_016652970.1	MSTRG.6757	LOC107826033	PREDICTED: glycine-rich cell wall structural protein 1.8-like [Nicotiana tabacum]	NA	NA	281	273	0.794521	6.5	..(((((((((-((((((((.&.)))))))).)))))))))..	UAUGGAGCUGC-AGGUGACCA&AGGUCAUCUAGCAGCUUCAAU	2	192.567	3	0.169624	Output/DS_TL/cleaveLand_result/t_plot/nta-MIR167a-p3_XM_016652970.1_273_TPlot.pdf
XM_016589248.1:1660	nta-miR396b	XM_016589248.1	107769992	LOC107769992	PREDICTED: heat shock 70 kDa protein 8-like [Nicotiana tabacum]	GO:0005524(ATP binding);GO:0005737(cytoplasm);GO:0006457(protein folding);GO:0009408(response to heat);GO:0009644(response to high light intensity);GO:0042542(response to hydrogen peroxide);GO:0042542(response to hydrogen peroxide)	03040(Spliceosome);04141(Protein processing in endoplasmic reticulum);04144(Endocytosis);04144(Endocytosis)	1669	1660	0.676647	4.5	((((..(((((((.((((((((&)))))))).)))))))-.))))	AGGUGACAAGAAAACUGUGGAA&UUCCACAGCUUUCUUG-AACUU	5	481.417	0	0.174213	Output/DS_TL/cleaveLand_result/t_plot/nta-miR396b_XM_016589248.1_1660_TPlot.pdf
XM_016615984.1:1099	nta-MIR6163-p5_1ss20AG	XM_016615984.1	MSTRG.20110	LOC107793600	PREDICTED: sphinganine C4-monooxygenase 1-like [Nicotiana tomentosiformis]	GO:0000170(sphingosine hydroxylase activity);GO:0003824(catalytic activity);GO:0005506(iron ion binding);GO:0005783(endoplasmic reticulum);GO:0005789(endoplasmic reticulum membrane);GO:0005794(Golgi apparatus);GO:0006633(fatty acid biosynthetic process);GO:0009640(photomorphogenesis);GO:0016021(integral component of membrane);GO:0016491(oxidoreductase activity);GO:0046520(sphingoid biosynthetic p…	00600(Sphingolipid metabolism)	1108	1099	0.694517	5.5	..((.((((((((((((((((.&.)))))))))))))))).))..	UCUUGGAACGUACAUGCCAUAC&UUAUGGCAUGUACGUUUGGGUC	2	192.567	3	0.174288	Output/DS_TL/cleaveLand_result/t_plot/nta-MIR6163-p5_1ss20AG_XM_016615984.1_1099_TPlot.pdf
XM_016598974.1:1956	nta-MIR6162-p3	XM_016598974.1	MSTRG.15361	LOC107778685	PREDICTED: protein CROWDED NUCLEI 1-like [Nicotiana tabacum]	GO:0000789(cytoplasmic chromatin);GO:0005515(protein binding);GO:0005634(nucleus);GO:0005635(nuclear envelope);GO:0005652(nuclear lamina);GO:0005654(nucleoplasm);GO:0005829(cytosol);GO:0006997(nucleus organization);GO:0031965(nuclear membrane);GO:0034399(nuclear periphery);GO:0097298(regulation of nucleus size)	01210(2-Oxocarboxylic acid metabolism);01230(Biosynthesis of amino acids);00270(Cysteine and methionine metabolism);00280(Valine, leucine and isoleucine degradation);00290(Valine, leucine and isoleucine biosynthesis);00770(Pantothenate and CoA biosynthesis)	1965	1956	0.834286	6	(((((((((..(((((((((((.&.)))))))))))--)))))))))	UCAGAGAGAGUUGGAAGCCCUUA&CAAGGGCUUCCA--UUUUUCUGA	3	288.85	2	0.174626	Output/DS_TL/cleaveLand_result/t_plot/nta-MIR6162-p3_XM_016598974.1_1956_TPlot.pdf
XM_016631827.1:1387	nta-miR171c	XM_016631827.1	MSTRG.24455	LOC107807449	PREDICTED: scarecrow-like protein 22 [Nicotiana tabacum]	GO:0003700(transcription factor activity, sequence-specific DNA binding);GO:0005634(nucleus);GO:0006355(regulation of transcription, DNA-templated);GO:0030154(cell differentiation);GO:0043565(sequence-specific DNA binding)	04075(Plant hormone signal transduction)	1396	1387	1	1	(((((((((((((((((((((&)))))))))))))))))))))	GAUAUUGGCGCGGCUCAAUCA&UGAUUGAGCCGUGCCAAUAUC	11	1059.12	2	0.174626	Output/DS_TL/cleaveLand_result/t_plot/nta-miR171c_XM_016631827.1_1387_TPlot.pdf
XM_016640247.1:1844	nta-miR172c	XM_016640247.1	MSTRG.3125	LOC107814784	PREDICTED: ethylene-responsive transcription factor RAP2-7-like isoform X2 [Nicotiana tabacum]	GO:0003677(DNA binding);GO:0003700(transcription factor activity, sequence-specific DNA binding);GO:0005634(nucleus);GO:0006351(transcription, DNA-templated);GO:0006355(regulation of transcription, DNA-templated);GO:0009908(flower development);GO:0010073(meristem maintenance);GO:0010093(specification of floral organ identity);GO:0019953(sexual reproduction);GO:0030154(cell differentiation);GO:004…	04075(Plant hormone signal transduction);04075(Plant hormone signal transduction)	1853	1844	0.997085	2	.((((((((((((((((((((&)))))))))))))))))))).	CUGCAGCAUCAUCAGGAUUCU&AGAAUCUUGAUGAUGCUGCAU	9	866.551	2	0.174626	Output/DS_TL/cleaveLand_result/t_plot/nta-miR172c_XM_016640247.1_1844_TPlot.pdf
XR_001651240.1:360	nta-miR6151g	XR_001651240.1	MSTRG.22026	LOC107799871	0	NA	NA	370	360	0.737226	6.5	(((((((((((((((.((.((((&)))).))-)))))))))))))))	UCAAUCCAGCGCCUCUAUCCUUA&UGAGUGU-GAGGCGUUGGAUUGA	6	577.701	2	0.174626	Output/DS_TL/cleaveLand_result/t_plot/nta-miR6151g_XR_001651240.1_360_TPlot.pdf
XM_016654476.1:1386	nta-miR477a	XM_016654476.1	MSTRG.7209	LOC107827359	PREDICTED: elongation factor 1-gamma 2-like isoform X1 [Nicotiana sylvestris]	GO:0003746(translation elongation factor activity);GO:0004364(glutathione transferase activity);GO:0005634(nucleus);GO:0005737(cytoplasm);GO:0006749(glutathione metabolic process);GO:0006749(glutathione metabolic process)	00970(Aminoacyl-tRNA biosynthesis);00970(Aminoacyl-tRNA biosynthesis)	1395	1386	0.761792	6.5	...((((((.(((((((((((.&.)))))))))))-))))))...	UAUGAGCCCUUUGAGGGAGAGG&ACUCUCCCUCAA-GGGCUUCUG	2	192.567	3	0.178926	Output/DS_TL/cleaveLand_result/t_plot/nta-miR477a_XM_016654476.1_1386_TPlot.pdf
XM_016587480.1:2193	nta-MIR6021-p3	XM_016587480.1	MSTRG.11929	LOC107768359	PREDICTED: 5-methyltetrahydropteroyltriglutamate--homocysteine methyltransferase-like [Nicotiana tabacum]	GO:0003871(5-methyltetrahydropteroyltriglutamate-homocysteine S-methyltransferase activity);GO:0005576(extracellular region);GO:0005829(cytosol);GO:0008705(methionine synthase activity);GO:0050667(homocysteine metabolic process);GO:0050667(homocysteine metabolic process)	01230(Biosynthesis of amino acids);00270(Cysteine and methionine metabolism);00450(Selenocompound metabolism);00450(Selenocompound metabolism)	2202	2193	0.767677	5.5	(((((((((((((.(.(((((&))))).).)))))))))))))	GGGAGGGAGUGAAGUAUGGUG&CAUCACAGUUCACUCCUUCCC	1	96.2835	4	0.181377	Output/DS_TL/cleaveLand_result/t_plot/nta-MIR6021-p3_XM_016587480.1_2193_TPlot.pdf
XM_016614653.1:676	nta-miR396a	XM_016614653.1	MSTRG.19726	LOC107792443	PREDICTED: uncharacterized protein LOC107792443 [Nicotiana tabacum]	GO:0003674(molecular_function);GO:0005739(mitochondrion);GO:0005773(vacuole);GO:0008150(biological_process);GO:0009507(chloroplast);GO:0009536(plastid);GO:0016021(integral component of membrane)	NA	685	676	0.834758	5	((((.((((((((((((((((&)))))))))))))))).))))	CGGUACAAGGGAGCUGUGGGG&UUCCACAGCUUUCUUGAACUG	1	96.2835	4	0.181377	Output/DS_TL/cleaveLand_result/t_plot/nta-miR396a_XM_016614653.1_676_TPlot.pdf
XM_016616276.1:331	nta-MIR6152b-p5_1ss10AG	XM_016616276.1	107793820	LOC107793820	PREDICTED: ABC transporter A family member 7-like isoform X1 [Nicotiana sylvestris]	GO:0006869(lipid transport);GO:0042626(ATPase activity, coupled to transmembrane movement of substances);GO:0043231(intracellular membrane-bounded organelle);GO:0043231(intracellular membrane-bounded organelle)	02010(ABC transporters);02010(ABC transporters)	340	331	0.733491	6	..(((((.(((((((((((((((.&.))))))))))))))).)))))..	UCUCCCCAAUUUCGUGCCGUGAAG&AUUCACGGCGUGAAAUAGGGGAUU	1	96.2835	4	0.181377	Output/DS_TL/cleaveLand_result/t_plot/nta-MIR6152b-p5_1ss10AG_XM_016616276.1_331_TPlot.pdf
XM_016626429.1:454	nta-miR395a	XM_016626429.1	MSTRG.2301	LOC107802851	PREDICTED: ATP sulfurylase 1, chloroplastic-like [Nicotiana sylvestris]	GO:0000103(sulfate assimilation);GO:0004020(adenylylsulfate kinase activity)	00920(Sulfur metabolism);00230(Purine metabolism);00450(Selenocompound metabolism);00261(Monobactam biosynthesis)	463	454	0.797954	3.5	((((((((((((((.(((((.&.))))).))))))))))))))	GAGUUCCUCCAAACUCUUCAU&CUGAAGUGUUUGGGGGAACUC	1	96.2835	4	0.181377	Output/DS_TL/cleaveLand_result/t_plot/nta-miR395a_XM_016626429.1_454_TPlot.pdf
XM_016626326.1:1082	nta-MIR6156-p5	XM_016626326.1	MSTRG.22956	LOC107802770	PREDICTED: cell division cycle and apoptosis regulator protein 1-like [Nicotiana tabacum]	GO:0005509(calcium ion binding);GO:0005515(protein binding);GO:0005634(nucleus);GO:0005737(cytoplasm);GO:0005829(cytosol);GO:0006355(regulation of transcription, DNA-templated);GO:0009793(embryo development ending in seed dormancy);GO:0055078(sodium ion homeostasis)	NA	1091	1082	0.718101	6	(((.(((((((((((((.(((.&.))).)))))))))))))-)))	GAGCUGUUGAGGAUGUCAUGUG&AAUAGGACAUCUUCAACA-CUC	2	192.567	3	0.183538	Output/DS_TL/cleaveLand_result/t_plot/nta-MIR6156-p5_XM_016626326.1_1082_TPlot.pdf
XM_016598812.1:767	nta-miR390b	XM_016598812.1	MSTRG.15317	LOC107778533	PREDICTED: photosystem II 22 kDa protein, chloroplastic [Nicotiana sylvestris]	GO:0009507(chloroplast);GO:0009517(PSII associated light-harvesting complex II);GO:0009523(photosystem II);GO:0009534(chloroplast thylakoid);GO:0009535(chloroplast thylakoid membrane);GO:0009579(thylakoid);GO:0010027(thylakoid membrane organization);GO:0010196(nonphotochemical quenching);GO:0015979(photosynthesis);GO:0016020(membrane);GO:0016021(integral component of membrane);GO:0016168(chloroph…	00195(Photosynthesis)	775	767	0.747178	6.5	(((.(((((((((((((-((..&..)).)))))))))))))-)))	GGCUGUUAUCCCUCCUG-GCAA&AAGCUCAGGAGGGAUAGC-GCC	5	481.417	2	0.185119	Output/DS_TL/cleaveLand_result/t_plot/nta-miR390b_XM_016598812.1_767_TPlot.pdf
XM_016631233.1:618	nta-miR398_L+2R-2	XM_016631233.1	MSTRG.24282	LOC107806960	PREDICTED: superoxide dismutase [Cu-Zn], chloroplastic [Nicotiana tabacum]	GO:0004784(superoxide dismutase activity);GO:0005507(copper ion binding);GO:0005737(cytoplasm);GO:0008270(zinc ion binding);GO:0019430(removal of superoxide radicals)	04146(Peroxisome)	626	618	0.728571	4.5	.((((((((((((((-(((((&))))).)))))))))))))).	CGGGUGACCUGGGAA-ACAUA&UAUGUGUUCUCAGGUCGCCCC	11	1059.12	2	0.185119	Output/DS_TL/cleaveLand_result/t_plot/nta-miR398_L+2R-2_XM_016631233.1_618_TPlot.pdf
XM_016631828.1:1237	nta-miR171c	XM_016631828.1	107807450	LOC107807450	PREDICTED: scarecrow-like protein 6 [Nicotiana tabacum]	GO:0003700(transcription factor activity, sequence-specific DNA binding);GO:0005634(nucleus);GO:0006355(regulation of transcription, DNA-templated);GO:0030154(cell differentiation);GO:0043565(sequence-specific DNA binding)	04075(Plant hormone signal transduction)	1246	1237	1	1	(((((((((((((((((((((&)))))))))))))))))))))	GAUAUUGGCGCGGCUCAAUCA&UGAUUGAGCCGUGCCAAUAUC	5	481.417	2	0.185119	Output/DS_TL/cleaveLand_result/t_plot/nta-miR171c_XM_016631828.1_1237_TPlot.pdf
XR_001650696.1:2190	nta-miR168a_R+1	XR_001650696.1	MSTRG.21295	LOC107797466	PREDICTED: stromal 70 kDa heat shock-related protein, chloroplastic [Nicotiana sylvestris]	GO:0005515(protein binding);GO:0005524(ATP binding);GO:0005622(intracellular);GO:0005623(cell);GO:0005634(nucleus);GO:0005739(mitochondrion);GO:0006457(protein folding);GO:0009408(response to heat);GO:0009409(response to cold);GO:0009507(chloroplast);GO:0009532(plastid stroma);GO:0009570(chloroplast stroma);GO:0009579(thylakoid);GO:0009941(chloroplast envelope);GO:0016032(viral process);GO:004503…	03040(Spliceosome);04141(Protein processing in endoplasmic reticulum);04144(Endocytosis)	2199	2190	0.724846	6	(((.((((.((((((((.(((((&))))).))))))))-)))).)))	GGUGCUGGUCCUGCACCUGGCGA&UCGCUUGGUGCAGG-UCGGGACC	5	481.417	2	0.185119	Output/DS_TL/cleaveLand_result/t_plot/nta-miR168a_R+1_XR_001650696.1_2190_TPlot.pdf
XR_001657212.1:824	nta-MIR397-p3	XR_001657212.1	MSTRG.6806	LOC107826148	PREDICTED: BAHD acyltransferase DCR [Nicotiana tomentosiformis]	GO:0005737(cytoplasm);GO:0005829(cytosol);GO:0009793(embryo development ending in seed dormancy);GO:0010090(trichome morphogenesis);GO:0010143(cutin biosynthetic process);GO:0016740(transferase activity);GO:0016747(transferase activity, transferring acyl groups other than amino-acyl groups);GO:0051179(localization)	00940(Phenylpropanoid biosynthesis);00945(Stilbenoid, diarylheptanoid and gingerol biosynthesis);00941(Flavonoid biosynthesis)	833	824	0.692494	7	..(((((((..((((((.((((((&)))))).))))))--)))))))..	CAAUUGAGUUCGCAGCGGGGAUGA&UCAUCUGCGCUGC--ACUCAAUCA	7	673.984	2	0.185119	Output/DS_TL/cleaveLand_result/t_plot/nta-MIR397-p3_XR_001657212.1_824_TPlot.pdf
XM_016576790.1:497	nta-miR6025b	XM_016576790.1	MSTRG.878	LOC107758939	binding partner of acd11 1, partial [Nicotiana attenuata]	GO:0000166(nucleotide binding);GO:0003676(nucleic acid binding)	NA	507	497	0.758065	5	(((((((((((.((((.(((((((&)))))))-))))-)))))))))))	GAUGUUGUCUCAAAUAUGUUGGCA&UGCCAAC-UAUU-GAGAUGACAUC	2	192.567	3	0.188124	Output/DS_TL/cleaveLand_result/t_plot/nta-miR6025b_XM_016576790.1_497_TPlot.pdf
XM_016645477.1:591	nta-MIR390c-p3	XM_016645477.1	MSTRG.4622	LOC107819369	PREDICTED: PGR5-like protein 1A, chloroplastic [Nicotiana tabacum]	GO:0005515(protein binding);GO:0009507(chloroplast);GO:0009534(chloroplast thylakoid);GO:0009535(chloroplast thylakoid membrane);GO:0009579(thylakoid);GO:0009773(photosynthetic electron transport in photosystem I);GO:0015979(photosynthesis);GO:0016021(integral component of membrane);GO:0016730(oxidoreductase activity, acting on iron-sulfur proteins as donors);GO:0042802(identical protein binding)	NA	600	591	0.752	4.5	(((((((((.((((((((((.&.)))))))))).)))))))))	UGAAACUUAAGAUGGAUGGCA&CGCUAUCCAUCCUGAGUUUCA	4	385.134	3	0.192684	Output/DS_TL/cleaveLand_result/t_plot/nta-MIR390c-p3_XM_016645477.1_591_TPlot.pdf
MSTRG.10921.2:190	nta-miR6019a	MSTRG.10921.2	MSTRG.10921	.	0	NA	NA	199	190	0.833333	7	.((((((((((((((((((...&...)))))))))))))))))).	CAACAUUUACAGGUCACCUAUU&UACAGGUGACUUGUAAAUGUUU	3	288.85	2	0.195478	Output/DS_TL/cleaveLand_result/t_plot/nta-miR6019a_MSTRG.10921.2_190_TPlot.pdf
XM_016599234.1:1755	nta-miR172c	XM_016599234.1	MSTRG.15422	LOC107778909	PREDICTED: ethylene-responsive transcription factor RAP2-7-like isoform X1 [Nicotiana tabacum]	GO:0010227(floral organ abscission);GO:0048316(seed development);GO:0048461(flower structural organization);GO:0080187(floral organ senescence);GO:0080187(floral organ senescence)	NA	1764	1755	0.997085	2	.((((((((((((((((((((&)))))))))))))))))))).	CUGCAGCAUCAUCAGGAUUCU&AGAAUCUUGAUGAUGCUGCAU	4	385.134	2	0.195478	Output/DS_TL/cleaveLand_result/t_plot/nta-miR172c_XM_016599234.1_1755_TPlot.pdf
XM_016602340.1:525	nta-miR396b	XM_016602340.1	MSTRG.16316	LOC107781604	low-temperature-induced cysteine proteinase-like precursor [Nicotiana tabacum]	GO:0004197(cysteine-type endopeptidase activity);GO:0005615(extracellular space);GO:0005764(lysosome);GO:0051603(proteolysis involved in cellular protein catabolic process)	04145(Phagosome)	534	525	0.874251	3.5	(((.(((((((((((((((((&))))))))))))))))).)))	AGGAUCAAGGAAGCUGUGGGA&UUCCACAGCUUUCUUGAACUU	7	673.984	2	0.195478	Output/DS_TL/cleaveLand_result/t_plot/nta-miR396b_XM_016602340.1_525_TPlot.pdf
XM_016643476.1:652	nta-miR156f	XM_016643476.1	107817617	LOC107817617	PREDICTED: squamosa promoter-binding-like protein 9 [Nicotiana tabacum]	NA	NA	661	652	0.905444	2	((((((..((((((((((((&))))))))))))..))))))	GUGCUCUCUCUCUUCUGUCA&UGACAGAAGAGAAUGAGCAC	15	1444.25	2	0.195478	Output/DS_TL/cleaveLand_result/t_plot/nta-miR156f_XM_016643476.1_652_TPlot.pdf
XM_016647076.1:1432	nta-miR156g_L+1	XM_016647076.1	107820735	LOC107820735	PREDICTED: squamosa promoter-binding-like protein 6 [Nicotiana sylvestris]	GO:0003677(DNA binding);GO:0003700(transcription factor activity, sequence-specific DNA binding);GO:0005634(nucleus);GO:0006351(transcription, DNA-templated);GO:0006355(regulation of transcription, DNA-templated);GO:0010468(regulation of gene expression);GO:0042742(defense response to bacterium);GO:0046872(metal ion binding)	NA	1441	1432	0.909091	2.5	(((((((((.(((((((((((&))))))))))).)))))))))	GUGCUCUCUCUCUUCUGUCAG&UUGACAGAAGAUAGAGAGCAC	2	192.567	3	0.197219	Output/DS_TL/cleaveLand_result/t_plot/nta-miR156g_L+1_XM_016647076.1_1432_TPlot.pdf
MSTRG.22955.2:634	nta-MIR6147-p3	MSTRG.22955.2	MSTRG.22955	LOC107802760	PREDICTED: aldehyde dehydrogenase [Nicotiana tomentosiformis]	GO:0004028(3-chloroallyl aldehyde dehydrogenase activity);GO:0004029(aldehyde dehydrogenase (NAD) activity)	00010(Glycolysis / Gluconeogenesis);00040(Pentose and glucuronate interconversions);00053(Ascorbate and aldarate metabolism);00620(Pyruvate metabolism);00071(Fatty acid degradation);00561(Glycerolipid metabolism);00280(Valine, leucine and isoleucine degradation);00310(Lysine degradation);00330(Arginine and proline metabolism);00340(Histidine metabolism);00380(Tryptophan metabolism);00410(beta-Ala…	643	634	0.781818	7	((...(((((((((((((((((&)))))))))))))))))-..))	CAGCUACAUCUUCAGUGCUCGC&GUGGGUAUUGAAGAUGU-UAUG	1	96.2835	4	0.19938	Output/DS_TL/cleaveLand_result/t_plot/nta-MIR6147-p3_MSTRG.22955.2_634_TPlot.pdf
XM_016611620.1:270	nta-miR6020a-5p	XM_016611620.1	107789752	LOC107789752	PREDICTED: TMV resistance protein N-like [Nicotiana tabacum]	GO:0005515(protein binding);GO:0005515(protein binding)	03040(Spliceosome);04141(Protein processing in endoplasmic reticulum);04144(Endocytosis);04144(Endocytosis)	279	270	1	1	(((((((((((((((((((((&)))))))))))))))))))))	GAAGAUACUCGGAAAACAUUU&AAAUGUUUUUCGAGUAUCUUC	1	96.2835	4	0.19938	Output/DS_TL/cleaveLand_result/t_plot/nta-miR6020a-5p_XM_016611620.1_270_TPlot.pdf
XM_016620655.1:2189	nta-MIR6021-p3	XM_016620655.1	MSTRG.21371	LOC107797732	PREDICTED: 5-methyltetrahydropteroyltriglutamate--homocysteine methyltransferase [Nicotiana tomentosiformis]	GO:0003871(5-methyltetrahydropteroyltriglutamate-homocysteine S-methyltransferase activity);GO:0005576(extracellular region);GO:0005829(cytosol);GO:0008705(methionine synthase activity);GO:0050667(homocysteine metabolic process);GO:0050667(homocysteine metabolic process)	01230(Biosynthesis of amino acids);00270(Cysteine and methionine metabolism);00450(Selenocompound metabolism);00450(Selenocompound metabolism)	2198	2189	0.767677	5.5	(((((((((((((.(.(((((&))))).).)))))))))))))	GGGAGGGAGUGAAGUAUGGUG&CAUCACAGUUCACUCCUUCCC	1	96.2835	4	0.19938	Output/DS_TL/cleaveLand_result/t_plot/nta-MIR6021-p3_XM_016620655.1_2189_TPlot.pdf
XM_016625206.1:620	nta-MIR6156-p5	XM_016625206.1	MSTRG.22662	LOC107801816	PREDICTED: uncharacterized protein At4g19900-like [Nicotiana tabacum]	NA	00603(Glycosphingolipid biosynthesis - globo series)	629	620	0.753709	5	((((((((((((((.((((((&)))))).))))))))))))))	GAGUGUUGAAGAUGCUUUGUU&AAUAGGACAUCUUCAACACUC	1	96.2835	4	0.19938	Output/DS_TL/cleaveLand_result/t_plot/nta-MIR6156-p5_XM_016625206.1_620_TPlot.pdf
XM_016632756.1:933	nta-miR6145e_R+1	XM_016632756.1	MSTRG.262	LOC107808222	PREDICTED: COBRA-like protein 4 [Nicotiana tabacum]	GO:0005774(vacuolar membrane);GO:0005886(plasma membrane);GO:0009834(plant-type secondary cell wall biogenesis);GO:0010215(cellulose microfibril organization);GO:0016049(cell growth);GO:0031225(anchored component of membrane)	NA	941	933	0.782258	6	((((((((((((.((((-((((.&.)))).))))-))))))))))))	AGCCAGUGCUGCAAUGU-ACAAA&AUUGUUACAU-GUAGCACUGGCU	1	96.2835	4	0.19938	Output/DS_TL/cleaveLand_result/t_plot/nta-miR6145e_R+1_XM_016632756.1_933_TPlot.pdf
XM_016639126.1:484	nta-miR6025a	XM_016639126.1	107813818	LOC107813818	PREDICTED: putative late blight resistance protein homolog R1A-10 [Nicotiana tabacum]	GO:0005524(ATP binding);GO:0006952(defense response);GO:0009506(plasmodesma);GO:0043531(ADP binding);GO:0005634(nucleus);GO:0005737(cytoplasm);GO:0005886(plasma membrane);GO:0009626(plant-type hypersensitive response);GO:0009814(defense response, incompatible interaction);GO:0009814(defense response, incompatible interaction)	04626(Plant-pathogen interaction);04626(Plant-pathogen interaction)	493	484	0.892308	3.5	...(((((((((((((((((((&)))))))))))))))))))...	AACGUUGUCUCAAUUGUUGGUA&UACCAACAAUUGAGAUAACAUC	1	96.2835	4	0.19938	Output/DS_TL/cleaveLand_result/t_plot/nta-miR6025a_XM_016639126.1_484_TPlot.pdf
XR_001649821.1:331	nta-MIR6152b-p5_1ss10AG	XR_001649821.1	107793820	LOC107793820	PREDICTED: ABC transporter A family member 7-like isoform X1 [Nicotiana sylvestris]	GO:0006869(lipid transport);GO:0042626(ATPase activity, coupled to transmembrane movement of substances);GO:0043231(intracellular membrane-bounded organelle);GO:0043231(intracellular membrane-bounded organelle)	02010(ABC transporters);02010(ABC transporters)	340	331	0.733491	6	..(((((.(((((((((((((((.&.))))))))))))))).)))))..	UCUCCCCAAUUUCGUGCCGUGAAG&AUUCACGGCGUGAAAUAGGGGAUU	1	96.2835	4	0.19938	Output/DS_TL/cleaveLand_result/t_plot/nta-MIR6152b-p5_1ss10AG_XR_001649821.1_331_TPlot.pdf
XR_001656447.1:215	nta-MIR160a-p3	XR_001656447.1	107822678	LOC107822678	0	NA	NA	224	215	0.770026	4.5	(((-((((((((((.((((((&)))))).)))))))))).)))	GGA-AUGCUUGGCUGCUCGUG&UAUGAGGAGCCAAGCAUAUCC	1	96.2835	4	0.19938	Output/DS_TL/cleaveLand_result/t_plot/nta-MIR160a-p3_XR_001656447.1_215_TPlot.pdf
XM_016591576.1:1807	nta-MIR6162-p3	XM_016591576.1	MSTRG.13080	LOC107772087	PREDICTED: protein CROWDED NUCLEI 1-like isoform X2 [Nicotiana tomentosiformis]	GO:0000789(cytoplasmic chromatin);GO:0005515(protein binding);GO:0005634(nucleus);GO:0005635(nuclear envelope);GO:0005652(nuclear lamina);GO:0005654(nucleoplasm);GO:0005829(cytosol);GO:0006997(nucleus organization);GO:0031965(nuclear membrane);GO:0034399(nuclear periphery);GO:0097298(regulation of nucleus size);GO:0097298(regulation of nucleus size)	01210(2-Oxocarboxylic acid metabolism);01230(Biosynthesis of amino acids);00270(Cysteine and methionine metabolism);00280(Valine, leucine and isoleucine degradation);00290(Valine, leucine and isoleucine biosynthesis);00770(Pantothenate and CoA biosynthesis);00770(Pantothenate and CoA biosynthesis)	1816	1807	0.834286	6	(((((((((..(((((((((((.&.)))))))))))--)))))))))	UCAGAGAGAGUUGGAAGCCCUUA&CAAGGGCUUCCA--UUUUUCUGA	2	192.567	2	0.205706	Output/DS_TL/cleaveLand_result/t_plot/nta-MIR6162-p3_XM_016591576.1_1807_TPlot.pdf
XM_016602710.1:806	nta-miR6151a	XM_016602710.1	MSTRG.16418	LOC107781891	PREDICTED: bifunctional UDP-glucose 4-epimerase and UDP-xylose 4-epimerase 1 [Nicotiana sylvestris]	GO:0003978(UDP-glucose 4-epimerase activity);GO:0005794(Golgi apparatus);GO:0005829(cytosol);GO:0005886(plasma membrane);GO:0006012(galactose metabolic process);GO:0033358(UDP-L-arabinose biosynthetic process);GO:0045227(capsule polysaccharide biosynthetic process);GO:0046369(galactose biosynthetic process);GO:0046983(protein dimerization activity);GO:0050373(UDP-arabinose 4-epimerase activity);G…	00052(Galactose metabolism);00520(Amino sugar and nucleotide sugar metabolism)	815	806	0.778075	3.5	.((((((.((((((((((((((&)))))))))))))).)))))).	ACAAUCUUAUGCCUUACAUUCA&UGAAUGUGAGGCAUUGGAUUGA	3	288.85	2	0.205706	Output/DS_TL/cleaveLand_result/t_plot/nta-miR6151a_XM_016602710.1_806_TPlot.pdf
XM_016637679.1:94	nta-miR6025a	XM_016637679.1	107812541	LOC107812541	PREDICTED: putative late blight resistance protein homolog R1A-10, partial [Nicotiana tabacum]	GO:0005524(ATP binding);GO:0006952(defense response);GO:0043531(ADP binding)	04626(Plant-pathogen interaction)	103	94	0.827692	5	((.(((((((((((((((((..&..))))))))))))))))).))	GACGUUAUCUCGAUUGUUGGAA&UACCAACAAUUGAGAUAACAUC	11	1059.12	2	0.205706	Output/DS_TL/cleaveLand_result/t_plot/nta-miR6025a_XM_016637679.1_94_TPlot.pdf
XM_016642884.1:1184	nta-miR156f	XM_016642884.1	107817110	LOC107817110	PREDICTED: squamosa promoter-binding-like protein 9 [Nicotiana tabacum]	NA	NA	1193	1184	0.905444	2	((((((..((((((((((((&))))))))))))..))))))	GUGCUCUCUCUCUUCUGUCA&UGACAGAAGAGAAUGAGCAC	14	1347.97	2	0.205706	Output/DS_TL/cleaveLand_result/t_plot/nta-miR156f_XM_016642884.1_1184_TPlot.pdf
XM_016646008.1:743	nta-MIR156g-p3	XM_016646008.1	MSTRG.4778	LOC107819855	PREDICTED: transmembrane emp24 domain-containing protein p24delta3-like [Nicotiana tomentosiformis]	GO:0005789(endoplasmic reticulum membrane);GO:0006886(intracellular protein transport);GO:0008320(protein transmembrane transporter activity);GO:0015031(protein transport);GO:0016020(membrane);GO:0016021(integral component of membrane);GO:0016192(vesicle-mediated transport)	NA	752	743	0.818919	4.5	(((((((((((.((((.((((((&)))))).))))-)))))))))))	GAAGCAUAGGGAAGCAGAAAUGA&UCAUUUGUGCU-CUCUAUGCUUC	3	288.85	2	0.205706	Output/DS_TL/cleaveLand_result/t_plot/nta-MIR156g-p3_XM_016646008.1_743_TPlot.pdf
XM_016577028.1:1305	nta-MIR6150-p5	XM_016577028.1	MSTRG.9024	LOC107759156	PREDICTED: vacuolar-sorting receptor 1-like [Nicotiana sylvestris]	GO:0000139(Golgi membrane);GO:0005509(calcium ion binding);GO:0005515(protein binding);GO:0005576(extracellular region);GO:0005622(intracellular);GO:0005623(cell);GO:0005770(late endosome);GO:0005783(endoplasmic reticulum);GO:0005794(Golgi apparatus);GO:0005802(trans-Golgi network);GO:0005886(plasma membrane);GO:0005887(integral component of plasma membrane);GO:0006623(protein targeting to vacuol…	NA	1313	1305	0.69496	5.5	(((((((..((((-(((((((.&.))))))).))))..)))))))	CUUGGCUUUGACG-UCAAACAG&UUGUUUGAUCGUCUUGGCCAAG	2	192.567	3	0.21067	Output/DS_TL/cleaveLand_result/t_plot/nta-MIR6150-p5_XM_016577028.1_1305_TPlot.pdf
XM_016581597.1:488	nta-MIR167e-p3	XM_016581597.1	MSTRG.10303	LOC107763149	PREDICTED: photosystem I reaction center subunit II, chloroplastic [Nicotiana tomentosiformis]	GO:0003674(molecular_function);GO:0009507(chloroplast);GO:0009534(chloroplast thylakoid);GO:0009535(chloroplast thylakoid membrane);GO:0009538(photosystem I reaction center);GO:0009579(thylakoid);GO:0009941(chloroplast envelope);GO:0015979(photosynthesis);GO:0016020(membrane)	00195(Photosynthesis)	498	488	0.764228	6.5	(((((((((((((.(((((..&..)))))-)))))))))))))	GGUGGUGCUGCUAUUAUGAGG&GAUCAUG-UAGCAGCAUCACC	5	481.417	3	0.21067	Output/DS_TL/cleaveLand_result/t_plot/nta-MIR167e-p3_XM_016581597.1_488_TPlot.pdf
XM_016594394.1:815	nta-MIR168e-p3	XM_016594394.1	MSTRG.14132	LOC107774751	PREDICTED: protein CYPRO4-like [Nicotiana tabacum]	GO:0003674(molecular_function);GO:0005737(cytoplasm)	NA	824	815	0.677262	6	..((((.((((((((.((((((&)))))).)))))))).))))..	AAUCAGAUGAUGCAAUGUGGGA&UCCCGCCUUGCAUCAACUGAAU	2	192.567	3	0.215104	Output/DS_TL/cleaveLand_result/t_plot/nta-MIR168e-p3_XM_016594394.1_815_TPlot.pdf
XM_016612143.1:573	nta-MIR319b-p5	XM_016612143.1	MSTRG.19008	LOC107790238	PREDICTED: delta(24)-sterol reductase-like [Nicotiana tabacum]	GO:0008202(steroid metabolic process)	00100(Steroid biosynthesis)	582	573	0.772277	4.5	....(((((((((((((((((&)))))))))))))))))....	UACGGGAUUGAAGGAAGCUCU&AGAGCUUCCUUCAGUCCACUC	11	1059.12	2	0.215804	Output/DS_TL/cleaveLand_result/t_plot/nta-MIR319b-p5_XM_016612143.1_573_TPlot.pdf
XM_016578592.1:2505	nta-MIR6145c-p5	XM_016578592.1	MSTRG.9469	LOC107760529	PREDICTED: mediator of RNA polymerase II transcription subunit 23 [Nicotiana tomentosiformis]	GO:0003674(molecular_function);GO:0005634(nucleus);GO:0006351(transcription, DNA-templated);GO:0006355(regulation of transcription, DNA-templated);GO:0016592(mediator complex)	NA	2514	2505	0.786885	7	(((((((((.(((((.((((((.&.)))))).)))))-)))))))))	GGCCAGUGCAAGCGUCUAGCAAA&AUUGUUAUAUGUU-GCACUGGCC	1	96.2835	4	0.216986	Output/DS_TL/cleaveLand_result/t_plot/nta-MIR6145c-p5_XM_016578592.1_2505_TPlot.pdf
XM_016584330.1:720	nta-miR164a	XM_016584330.1	107765662	LOC107765662	PREDICTED: NAC domain-containing protein 100 isoform X1 [Nicotiana sylvestris]	GO:0003677(DNA binding);GO:0003700(transcription factor activity, sequence-specific DNA binding);GO:0005634(nucleus);GO:0006351(transcription, DNA-templated);GO:0006355(regulation of transcription, DNA-templated);GO:0007275(multicellular organism development);GO:0007275(multicellular organism development)	03018(RNA degradation);03018(RNA degradation)	729	720	0.769752	4	.(.(((((((.(((((((((((&))))))))))).)))))))-).	AGCCACGUGCACUGCUUCUCCA&UGGAGAAGCAGGGCACGUG-CA	1	96.2835	4	0.216986	Output/DS_TL/cleaveLand_result/t_plot/nta-miR164a_XM_016584330.1_720_TPlot.pdf
XM_016591494.1:1064	nta-miR396b	XM_016591494.1	107772002	LOC107772002	PREDICTED: growth-regulating factor 3-like isoform X1 [Nicotiana tabacum]	GO:0005524(ATP binding);GO:0005634(nucleus);GO:0006351(transcription, DNA-templated);GO:0006355(regulation of transcription, DNA-templated);GO:0010114(response to red light);GO:0010218(response to far red light);GO:0048366(leaf development);GO:0080167(response to karrikin);GO:0080167(response to karrikin)	NA	1074	1064	0.874251	4	..((((((((((((.(((((((&)))))))-))))))))))))..	CCGUUCAAGAAAGCAUGUGGAA&UUCCACA-GCUUUCUUGAACUU	1	96.2835	4	0.216986	Output/DS_TL/cleaveLand_result/t_plot/nta-miR396b_XM_016591494.1_1064_TPlot.pdf
XM_016591574.1:1936	nta-MIR6162-p3	XM_016591574.1	#N/A	#N/A	#N/A	#N/A	#N/A	1945	1936	0.834286	6	(((((((((..(((((((((((.&.)))))))))))--)))))))))	UCAGAGAGAGUUGGAAGCCCUUA&CAAGGGCUUCCA--UUUUUCUGA	1	96.2835	4	0.216986	Output/DS_TL/cleaveLand_result/t_plot/nta-MIR6162-p3_XM_016591574.1_1936_TPlot.pdf
XM_016634436.1:938	nta-miR156g_L+1	XM_016634436.1	107809759	LOC107809759	PREDICTED: squamosa promoter-binding-like protein 9 [Nicotiana tabacum]	GO:0003677(DNA binding);GO:0003700(transcription factor activity, sequence-specific DNA binding);GO:0005634(nucleus);GO:0005737(cytoplasm);GO:0006351(transcription, DNA-templated);GO:0006355(regulation of transcription, DNA-templated);GO:0010228(vegetative to reproductive phase transition of meristem);GO:0046872(metal ion binding);GO:0048366(leaf development);GO:0048653(anther development);GO:200…	04075(Plant hormone signal transduction)	947	938	0.928375	2	(((((((((.(((((((((((&))))))))))).)))))))))	GUGCUCUCUCUCUUCUGUCAA&UUGACAGAAGAUAGAGAGCAC	1	96.2835	4	0.216986	Output/DS_TL/cleaveLand_result/t_plot/nta-miR156g_L+1_XM_016634436.1_938_TPlot.pdf
XM_016611231.1:1307	nta-MIR408-p5	XM_016611231.1	MSTRG.18779	LOC107789425	PREDICTED: auxin response factor 2-like isoform X2 [Nicotiana tabacum]	GO:0003677(DNA binding);GO:0003700(transcription factor activity, sequence-specific DNA binding);GO:0005515(protein binding);GO:0005634(nucleus);GO:0006351(transcription, DNA-templated);GO:0006355(regulation of transcription, DNA-templated);GO:0008285(negative regulation of cell proliferation);GO:0009734(auxin-activated signaling pathway);GO:0009737(response to abscisic acid);GO:0009911(positive …	04075(Plant hormone signal transduction);04075(Plant hormone signal transduction)	1317	1307	0.711905	7	.((((((((.(((((((.((((.&.))))-)))))))-)))))))).	AAUGUUCUGCCCUCGUCUCCUGA&ACAGG-GACGAGG-UAGAGCAUG	2	192.567	2	0.225774	Output/DS_TL/cleaveLand_result/t_plot/nta-MIR408-p5_XM_016611231.1_1307_TPlot.pdf
XM_016649820.1:906	nta-miR156f	XM_016649820.1	107823216	LOC107823216	PREDICTED: squamosa promoter-binding-like protein 9 [Nicotiana tabacum]	GO:0003677(DNA binding);GO:0003700(transcription factor activity, sequence-specific DNA binding);GO:0005634(nucleus);GO:0006351(transcription, DNA-templated);GO:0006355(regulation of transcription, DNA-templated);GO:0008361(regulation of cell size);GO:0010228(vegetative to reproductive phase transition of meristem);GO:0042127(regulation of cell proliferation);GO:0046872(metal ion binding);GO:0048…	NA	915	906	0.905444	2	((((((..((((((((((((&))))))))))))..))))))	GUGCUCUCUCUCUUCUGUCA&UGACAGAAGAGAAUGAGCAC	5	481.417	2	0.225774	Output/DS_TL/cleaveLand_result/t_plot/nta-miR156f_XM_016649820.1_906_TPlot.pdf
XM_016655676.1:103	nta-MIR6145a-p3	XM_016655676.1	MSTRG.7566	LOC107828389	PREDICTED: 60S ribosomal protein L27a-3-like [Nicotiana tabacum]	GO:0003735(structural constituent of ribosome);GO:0022625(cytosolic large ribosomal subunit)	03010(Ribosome)	112	103	0.682927	6.5	((.(((---((((((((((((&))))))))))))...))).))	GUGGCC---ACGUGAGCGCCG&CGGUGCUCAUGUGAAGGUGAC	2	192.567	3	0.228255	Output/DS_TL/cleaveLand_result/t_plot/nta-MIR6145a-p3_XM_016655676.1_103_TPlot.pdf
XM_016578417.1:342	nta-miR396b	XM_016578417.1	107760378	LOC107760378	PREDICTED: putative B3 domain-containing protein At5g35780 [Nicotiana tabacum]	NA	NA	351	342	0.862275	4	....(((((((((((((((((&)))))))))))))))))....	AUGAUCAAGAAAGCUGUGGAA&UUCCACAGCUUUCUUGAACUU	2	192.567	3	0.23259	Output/DS_TL/cleaveLand_result/t_plot/nta-miR396b_XM_016578417.1_342_TPlot.pdf
XM_016613043.1:4743	nta-MIR6162-p3	XM_016613043.1	107791053	LOC107791053	PREDICTED: uncharacterized protein LOC104234829 isoform X3 [Nicotiana sylvestris]	GO:0003674(molecular_function);GO:0005634(nucleus);GO:0005773(vacuole);GO:0005829(cytosol);GO:0005886(plasma membrane);GO:0008150(biological_process);GO:0016021(integral component of membrane);GO:0016021(integral component of membrane)	NA	4752	4743	0.834286	4.5	.(((((((((((((((((((.&.))))))))))))))))))).	ACAGAGAAAUGGAGGCUCUUA&CAAGGGCUUCCAUUUUUCUGA	1	96.2835	4	0.234206	Output/DS_TL/cleaveLand_result/t_plot/nta-MIR6162-p3_XM_016613043.1_4743_TPlot.pdf
XM_016616854.1:276	nta-MIR156c-p3_1ss22TC	XM_016616854.1	107794372	LOC107794372	PREDICTED: cytokinin riboside 5'-monophosphate phosphoribohydrolase LOG3 isoform X2 [Nicotiana tabacum]	GO:0005634(nucleus);GO:0005829(cytosol);GO:0009691(cytokinin biosynthetic process);GO:0016799(hydrolase activity, hydrolyzing N-glycosyl compounds);GO:0016799(hydrolase activity, hydrolyzing N-glycosyl compounds)	NA	287	276	0.739326	7	(((((..(((((((((((((((..(((&)))--)))))))))))))))--)))))	GGUGAAACAGUAGGAGAAGUGAAGGCA&UGC--UCACUUCUCUUGCUG--UCACC	1	96.2835	4	0.234206	Output/DS_TL/cleaveLand_result/t_plot/nta-MIR156c-p3_1ss22TC_XM_016616854.1_276_TPlot.pdf
XM_016642552.1:1261	nta-MIR6154a-p5	XM_016642552.1	MSTRG.3803	LOC107816805	PREDICTED: glycine-rich cell wall structural protein 1.8-like [Nicotiana tabacum]	NA	NA	1269	1261	0.702765	7	((((((..((((.((((((-((((&)))).))))))-))))-.))))))	GGUGGAGCCUACGCUGGAG-GAGG&CCUUACUCCAG-GUAG-AUCCACC	1	96.2835	4	0.234206	Output/DS_TL/cleaveLand_result/t_plot/nta-MIR6154a-p5_XM_016642552.1_1261_TPlot.pdf
XM_016588082.1:1924	nta-miR156f	XM_016588082.1	MSTRG.12091	LOC107768912	teosinte glume architecture 1-like [Nicotiana tabacum]	GO:0003677(DNA binding);GO:0003700(transcription factor activity, sequence-specific DNA binding);GO:0005634(nucleus);GO:0006351(transcription, DNA-templated);GO:0006355(regulation of transcription, DNA-templated);GO:0046872(metal ion binding);GO:0048653(anther development);GO:0048653(anther development)	NA	1933	1924	0.902579	2	((((((..((((((((((((&))))))))))))..))))))	GUGCUCUCUCUCUUCUGUCA&UGACAGAAGAGAAUGAGCAC	2	192.567	2	0.235616	Output/DS_TL/cleaveLand_result/t_plot/nta-miR156f_XM_016588082.1_1924_TPlot.pdf
XM_016621386.1:1267	nta-miR6151f	XM_016621386.1	107798403	LOC107798403	PREDICTED: cleavage stimulation factor subunit 77-like isoform X4 [Nicotiana tabacum]	GO:0003729(mRNA binding);GO:0005634(nucleus);GO:0006379(mRNA cleavage);GO:0031123(RNA 3'-end processing);GO:0031123(RNA 3'-end processing)	03015(mRNA surveillance pathway);03015(mRNA surveillance pathway)	1277	1267	0.75063	6.5	(.((((((((((((((.((((..&..))))-)))))))))))))).)	UGGAUCCAAUGCCUCAGCACUGU&UGAGUG-UGAGGCAUUGGAUUGA	2	192.567	2	0.235616	Output/DS_TL/cleaveLand_result/t_plot/nta-miR6151f_XM_016621386.1_1267_TPlot.pdf
XM_016638837.1:950	nta-MIR6150-p5	XM_016638837.1	MSTRG.2751	LOC107813556	PREDICTED: uncharacterized hydrolase YugF-like [Nicotiana tabacum]	GO:0016787(hydrolase activity)	NA	959	950	0.718833	6.5	...(((.(((((((((((((((&))))))))))))))).)))...	UGGGGUGAAGACGAUCAGAUAA&UUGUUUGAUCGUCUUGGCCAAG	9	866.551	2	0.235616	Output/DS_TL/cleaveLand_result/t_plot/nta-MIR6150-p5_XM_016638837.1_950_TPlot.pdf
XM_016629967.1:289	nta-MIR6158b-p3	XM_016629967.1	MSTRG.23941	LOC107805871	PREDICTED: uncharacterized protein LOC104232681 [Nicotiana sylvestris]	GO:0003674(molecular_function);GO:0005886(plasma membrane);GO:0008150(biological_process);GO:0016021(integral component of membrane)	NA	298	289	0.653928	7	....(((((((-((((((((((&)))))))))).)))))))....	AUGGCAGUGCC-ACCUGCUCAA&UUGAGCGGGUCGGCACUGGAGU	2	192.567	3	0.2369	Output/DS_TL/cleaveLand_result/t_plot/nta-MIR6158b-p3_XM_016629967.1_289_TPlot.pdf
XM_016589246.1:1629	nta-miR396b	XM_016589246.1	107769992	LOC107769992	PREDICTED: heat shock 70 kDa protein 8-like [Nicotiana tabacum]	GO:0005524(ATP binding);GO:0005737(cytoplasm);GO:0006457(protein folding);GO:0009408(response to heat);GO:0009644(response to high light intensity);GO:0042542(response to hydrogen peroxide);GO:0042542(response to hydrogen peroxide)	03040(Spliceosome);04141(Protein processing in endoplasmic reticulum);04144(Endocytosis);04144(Endocytosis)	1638	1629	0.676647	4.5	((((..(((((((.((((((((&)))))))).)))))))-.))))	AGGUGACAAGAAAACUGUGGAA&UUCCACAGCUUUCUUG-AACUU	3	288.85	1	0.237456	Output/DS_TL/cleaveLand_result/t_plot/nta-miR396b_XM_016589246.1_1629_TPlot.pdf
MSTRG.11281.1:437	nta-miR390a	MSTRG.11281.1	MSTRG.11281	LOC107766079	PREDICTED: WRKY transcription factor WRKY24-like [Nicotiana tomentosiformis]	GO:0003700(transcription factor activity, sequence-specific DNA binding);GO:0005515(protein binding);GO:0005634(nucleus);GO:0006351(transcription, DNA-templated);GO:0006355(regulation of transcription, DNA-templated);GO:0006970(response to osmotic stress);GO:0009408(response to heat);GO:0009409(response to cold);GO:0009414(response to water deprivation);GO:0009651(response to salt stress);GO:0010…	04626(Plant-pathogen interaction)	445	437	0.71028	4.5	..((((((((((((((-((((&)))).))))))))))))))..	UUUGCUAUUCCUCCUG-GCUU&AAGCUCAGGAGGGAUAGCACC	2	192.567	3	0.241187	Output/DS_TL/cleaveLand_result/t_plot/nta-miR390a_MSTRG.11281.1_437_TPlot.pdf
XM_016583566.1:194	nta-MIR169m-p3_1ss18AG	XM_016583566.1	MSTRG.10973	LOC107764993	PREDICTED: uncharacterized protein LOC107764993 [Nicotiana tabacum]	GO:0003674(molecular_function);GO:0008150(biological_process);GO:0016021(integral component of membrane)	NA	203	194	0.670534	5.5	(((.(((((-((((((((((((&)))))))))))).)))))-)))	UCCUUUGGC-GCAGUCUGCUCU&AGAGUGGAUUGCAGCCAG-GGA	2	192.567	3	0.241187	Output/DS_TL/cleaveLand_result/t_plot/nta-MIR169m-p3_1ss18AG_XM_016583566.1_194_TPlot.pdf
XM_016589247.1:1644	nta-miR396b	XM_016589247.1	107769992	LOC107769992	PREDICTED: heat shock 70 kDa protein 8-like [Nicotiana tabacum]	GO:0005524(ATP binding);GO:0005737(cytoplasm);GO:0006457(protein folding);GO:0009408(response to heat);GO:0009644(response to high light intensity);GO:0042542(response to hydrogen peroxide);GO:0042542(response to hydrogen peroxide)	03040(Spliceosome);04141(Protein processing in endoplasmic reticulum);04144(Endocytosis);04144(Endocytosis)	1653	1644	0.676647	4.5	((((..(((((((.((((((((&)))))))).)))))))-.))))	AGGUGACAAGAAAACUGUGGAA&UUCCACAGCUUUCUUG-AACUU	3	288.85	1	0.244637	Output/DS_TL/cleaveLand_result/t_plot/nta-miR396b_XM_016589247.1_1644_TPlot.pdf
XM_016592762.1:826	nta-miR6146b	XM_016592762.1	MSTRG.13621	LOC107773337	PREDICTED: CLP protease regulatory subunit CLPX1, mitochondrial-like, partial [Nicotiana tabacum]	GO:0004176(ATP-dependent peptidase activity);GO:0005524(ATP binding);GO:0005759(mitochondrial matrix);GO:0006508(proteolysis);GO:0030163(protein catabolic process)	NA	835	826	0.733555	6	(((((((...(((((((((((.&.)))))))))))...)))))))	GAUAAGUUUGUUAUUGGACAGG&UUUGUCCAAUGAAAUACUUAUC	4	385.134	2	0.245334	Output/DS_TL/cleaveLand_result/t_plot/nta-miR6146b_XM_016592762.1_826_TPlot.pdf
XM_016632769.1:1367	nta-miR160d	XM_016632769.1	107808261	LOC107808261	PREDICTED: heat stress transcription factor B-2b-like [Nicotiana tabacum]	GO:0005634(nucleus);GO:0005634(nucleus)	NA	1376	1367	0.763713	6	.(((.(((.((((((((((((.&.)))))))))))).)))-))).	GGGUGAUGGGGGGAGCCGGGCU&UGCCUGGCUCCCUGCAU-GCCA	2	192.567	2	0.245334	Output/DS_TL/cleaveLand_result/t_plot/nta-miR160d_XM_016632769.1_1367_TPlot.pdf
XM_016635552.1:1294	nta-MIR6158b-p5	XM_016635552.1	MSTRG.25446	LOC107810741	PREDICTED: transcription factor VOZ1-like [Nicotiana sylvestris]	GO:0005515(protein binding);GO:0005634(nucleus);GO:0005737(cytoplasm);GO:0006351(transcription, DNA-templated);GO:0009585(red, far-red light phototransduction);GO:0043565(sequence-specific DNA binding);GO:0045893(positive regulation of transcription, DNA-templated);GO:0046872(metal ion binding);GO:0048574(long-day photoperiodism, flowering);GO:0048578(positive regulation of long-day photoperiodis…	NA	1303	1294	0.671123	6.5	.(((((((--((((((((((((&))))))))))))..))))))).	UGUGCCCU--GUACAGAUUGGA&UUCGAUUUGUACGAAGGGCAUG	2	192.567	2	0.245334	Output/DS_TL/cleaveLand_result/t_plot/nta-MIR6158b-p5_XM_016635552.1_1294_TPlot.pdf
XM_016638928.1:405	nta-miR169t_R-1_1ss8GT	XM_016638928.1	MSTRG.2779	LOC107813647	PREDICTED: zinc finger A20 and AN1 domain-containing stress-associated protein 8-like [Nicotiana tabacum]	GO:0003677(DNA binding);GO:0005634(nucleus);GO:0008150(biological_process);GO:0008270(zinc ion binding);GO:0008270(zinc ion binding)	NA	414	405	0.776204	5.5	((((.((((((((((((((.&.)))))))))))))).))))	GGGCCAGUCGUUGUUGGCUC&UAGCCAAUGAUGACUUGCCU	2	192.567	2	0.245334	Output/DS_TL/cleaveLand_result/t_plot/nta-miR169t_R-1_1ss8GT_XM_016638928.1_405_TPlot.pdf
XM_016654505.1:10587	nta-MIR6144-p3	XM_016654505.1	MSTRG.7221	LOC107827382	PREDICTED: titin-like isoform X8 [Nicotiana tabacum]	NA	NA	10596	10587	0.835913	5.5	((((((((((..(((((((((&)))))))))..))))))))))	GGUGGAAACUGAUUCAACAGG&CUUGUUGAAGAAGUUUCCAUC	2	192.567	2	0.245334	Output/DS_TL/cleaveLand_result/t_plot/nta-MIR6144-p3_XM_016654505.1_10587_TPlot.pdf
XM_016626967.1:1178	nta-miR156g_L+1	XM_016626967.1	107803280	LOC107803280	PREDICTED: squamosa promoter-binding-like protein 16 [Nicotiana tabacum]	GO:0003677(DNA binding);GO:0003700(transcription factor activity, sequence-specific DNA binding);GO:0005634(nucleus);GO:0006351(transcription, DNA-templated);GO:0006355(regulation of transcription, DNA-templated);GO:0046872(metal ion binding);GO:0048653(anther development);GO:0048653(anther development)	NA	1187	1178	0.906336	3	(((((((((.((((((((((.&.)))))))))).)))))))))	GUGCUCUCUCUCUUCUGUCAU&UUGACAGAAGAUAGAGAGCAC	2	192.567	3	0.245449	Output/DS_TL/cleaveLand_result/t_plot/nta-miR156g_L+1_XM_016626967.1_1178_TPlot.pdf
XM_016636903.1:409	nta-miR390a	XM_016636903.1	MSTRG.25802	LOC107811911	PREDICTED: probable WRKY transcription factor 33 [Nicotiana tabacum]	GO:0003700(transcription factor activity, sequence-specific DNA binding);GO:0005515(protein binding);GO:0005634(nucleus);GO:0006351(transcription, DNA-templated);GO:0006355(regulation of transcription, DNA-templated);GO:0006970(response to osmotic stress);GO:0009408(response to heat);GO:0009409(response to cold);GO:0009414(response to water deprivation);GO:0009651(response to salt stress);GO:0010…	04626(Plant-pathogen interaction)	417	409	0.71028	4.5	..((((((((((((((-((((&)))).))))))))))))))..	UUUGCUAUUCCUCCUG-GCUU&AAGCUCAGGAGGGAUAGCACC	2	192.567	3	0.245449	Output/DS_TL/cleaveLand_result/t_plot/nta-miR390a_XM_016636903.1_409_TPlot.pdf
XM_016594406.1:1617	nta-miR156g_L+1	XM_016594406.1	107774760	LOC107774760	squamosa promoter-binding-like protein 6 [Nicotiana tabacum]	GO:0003677(DNA binding);GO:0003700(transcription factor activity, sequence-specific DNA binding);GO:0005634(nucleus);GO:0006351(transcription, DNA-templated);GO:0006355(regulation of transcription, DNA-templated);GO:0010468(regulation of gene expression);GO:0042742(defense response to bacterium);GO:0046872(metal ion binding);GO:0046872(metal ion binding)	NA	1626	1617	0.898072	3	(((((((((.((((((((((.&.)))))))))).)))))))))	GUGCUCUCUCUCUUCUGUCAU&UUGACAGAAGAUAGAGAGCAC	2	192.567	3	0.249687	Output/DS_TL/cleaveLand_result/t_plot/nta-miR156g_L+1_XM_016594406.1_1617_TPlot.pdf
MSTRG.21371.1:2427	nta-MIR6021-p3	MSTRG.21371.1	MSTRG.21371	LOC107797732	PREDICTED: 5-methyltetrahydropteroyltriglutamate--homocysteine methyltransferase [Nicotiana tomentosiformis]	GO:0003871(5-methyltetrahydropteroyltriglutamate-homocysteine S-methyltransferase activity);GO:0005576(extracellular region);GO:0005829(cytosol);GO:0008705(methionine synthase activity);GO:0050667(homocysteine metabolic process);GO:0050667(homocysteine metabolic process)	01230(Biosynthesis of amino acids);00270(Cysteine and methionine metabolism);00450(Selenocompound metabolism);00450(Selenocompound metabolism)	2436	2427	0.767677	5.5	(((((((((((((.(.(((((&))))).).)))))))))))))	GGGAGGGAGUGAAGUAUGGUG&CAUCACAGUUCACUCCUUCCC	1	96.2835	4	0.251047	Output/DS_TL/cleaveLand_result/t_plot/nta-MIR6021-p3_MSTRG.21371.1_2427_TPlot.pdf
XM_016578044.1:2005	nta-MIR6160-p5	XM_016578044.1	MSTRG.9318	LOC107760026	PREDICTED: probable inactive purple acid phosphatase 2 [Nicotiana tomentosiformis]	GO:0003993(acid phosphatase activity);GO:0004722(protein serine/threonine phosphatase activity);GO:0005515(protein binding);GO:0005576(extracellular region);GO:0005622(intracellular);GO:0005623(cell);GO:0005737(cytoplasm);GO:0005739(mitochondrion);GO:0005740(mitochondrial envelope);GO:0005768(endosome);GO:0005794(Golgi apparatus);GO:0005802(trans-Golgi network);GO:0006109(regulation of carbohydra…	NA	2015	2005	0.683333	7	..(((((((((((((.(((((((((&)))))))))-)))))))))))))..	AUGGGUUACAUAGUUGGGUUCAUAU&AUAUGGGCC-AACUGUGUAACUCUA	1	96.2835	4	0.251047	Output/DS_TL/cleaveLand_result/t_plot/nta-MIR6160-p5_XM_016578044.1_2005_TPlot.pdf
XM_016580371.1:2584	nta-miR167a_L+1R-1	XM_016580371.1	MSTRG.9972	LOC107762058	PREDICTED: auxin response factor 6-like isoform X2 [Nicotiana tabacum]	GO:0003677(DNA binding);GO:0003700(transcription factor activity, sequence-specific DNA binding);GO:0005515(protein binding);GO:0005634(nucleus);GO:0006351(transcription, DNA-templated);GO:0006355(regulation of transcription, DNA-templated);GO:0009733(response to auxin);GO:0009734(auxin-activated signaling pathway);GO:0009908(flower development);GO:0009908(flower development)	04075(Plant hormone signal transduction);04075(Plant hormone signal transduction)	2593	2584	0.754854	7	.((((((.(((((((((((...&...))))))))))).)))))).	GAGAUCAGGCUGGCAGCUUGUA&UUGAAGCUGCCAGCAUGAUCUG	1	96.2835	4	0.251047	Output/DS_TL/cleaveLand_result/t_plot/nta-miR167a_L+1R-1_XM_016580371.1_2584_TPlot.pdf
XM_016591445.1:1223	nta-MIR169m-p3_1ss18AG	XM_016591445.1	MSTRG.13050	LOC107771978	PREDICTED: splicing factor U2af large subunit A-like isoform X4 [Nicotiana sylvestris]	GO:0000243(commitment complex);GO:0008187(poly-pyrimidine tract binding);GO:0016607(nuclear speck);GO:0030628(pre-mRNA 3'-splice site binding);GO:0071004(U2-type prespliceosome);GO:0089701(U2AF);GO:0089701(U2AF)	03040(Spliceosome);03040(Spliceosome)	1230	1223	0.719258	6	(((((((((((((--(((((.&.)))))..)))))))))))))	UCCCUGGCUGCAA--CACUUG&AGAGUGGAUUGCAGCCAGGGA	1	96.2835	4	0.251047	Output/DS_TL/cleaveLand_result/t_plot/nta-MIR169m-p3_1ss18AG_XM_016591445.1_1223_TPlot.pdf
XM_016624084.1:1919	nta-miR395a	XM_016624084.1	107800842	LOC107800842	PREDICTED: phosphoinositide phosphatase SAC2-like [Nicotiana tabacum]	GO:0004439(phosphatidylinositol-4,5-bisphosphate 5-phosphatase activity);GO:0005634(nucleus);GO:0005774(vacuolar membrane);GO:0007033(vacuole organization);GO:0036092(phosphatidylinositol-3-phosphate biosynthetic process);GO:0042578(phosphoric ester hydrolase activity)	03440(Homologous recombination)	1928	1919	0.772379	5	((((((((((((.((((((((&)))))))).))))))))))))	GAGUUCUUCCGAUCGCUUCAG&CUGAAGUGUUUGGGGGAACUC	1	96.2835	4	0.251047	Output/DS_TL/cleaveLand_result/t_plot/nta-miR395a_XM_016624084.1_1919_TPlot.pdf
XM_016630424.1:682	nta-MIR6149a-p3	XM_016630424.1	#N/A	#N/A	#N/A	#N/A	#N/A	691	682	0.736544	4.5	(((.((((.((((((((((((&)))))))))))).)))).)))	GUUGGAUGGGGAUCCAAACCG&CGGUUUGGGUUCGUAUCAAAC	1	96.2835	4	0.251047	Output/DS_TL/cleaveLand_result/t_plot/nta-MIR6149a-p3_XM_016630424.1_682_TPlot.pdf
XM_016641177.1:664	nta-MIR6149b-p3	XM_016641177.1	MSTRG.3399	LOC107815568	PREDICTED: pentatricopeptide repeat-containing protein At5g25630-like isoform X1 [Nicotiana tabacum]	GO:0004672(protein kinase activity);GO:0005524(ATP binding);GO:0005739(mitochondrion);GO:0006468(protein phosphorylation);GO:0006468(protein phosphorylation)	NA	673	664	0.722222	6	...(((((((((((((((((.&.)))))))))))))))))...	AAAUGGUAUGAAUCCAGAUCC&CGAUCUGGGUUCGUAUCAAAC	1	96.2835	4	0.251047	Output/DS_TL/cleaveLand_result/t_plot/nta-MIR6149b-p3_XM_016641177.1_664_TPlot.pdf
XM_016652969.1:788	nta-MIR6154a-p5	XM_016652969.1	#N/A	#N/A	#N/A	#N/A	#N/A	796	788	0.702765	7	((((((..((((.((((((-((((&)))).))))))-))))-.))))))	GGUGGAGCCUACGCUGGAG-GAGG&CCUUACUCCAG-GUAG-AUCCACC	1	96.2835	4	0.251047	Output/DS_TL/cleaveLand_result/t_plot/nta-MIR6154a-p5_XM_016652969.1_788_TPlot.pdf
XM_016595698.1:680	nta-miR398_L+2R-2	XM_016595698.1	MSTRG.14490	LOC107775897	PREDICTED: thylakoid lumenal protein TL20.3, chloroplastic-like [Nicotiana tabacum]	GO:0003674(molecular_function);GO:0005576(extracellular region);GO:0008150(biological_process);GO:0009507(chloroplast);GO:0009534(chloroplast thylakoid);GO:0009535(chloroplast thylakoid membrane);GO:0009543(chloroplast thylakoid lumen);GO:0009579(thylakoid)	NA	690	680	0.690476	6	(((((.((((((((.(((((((.&.)))))))-))))))))-)))))	GGGGCAGAUUUGAGUGACACAUU&UAUGUGUU-CUCAGGUC-GCCCC	2	192.567	3	0.253901	Output/DS_TL/cleaveLand_result/t_plot/nta-miR398_L+2R-2_XM_016595698.1_680_TPlot.pdf
XM_016604540.1:596	nta-MIR6147-p3	XM_016604540.1	MSTRG.1684	LOC107783554	PREDICTED: protein FAM32A [Nicotiana tomentosiformis]	GO:0005730(nucleolus)	00100(Steroid biosynthesis)	605	596	0.739394	6.5	..((((((((((((((.((((&)))).))))))))))))))..	UUUAGCAUCUUCGAUAGCUAC&GUGGGUAUUGAAGAUGUUAUG	2	192.567	3	0.253901	Output/DS_TL/cleaveLand_result/t_plot/nta-MIR6147-p3_XM_016604540.1_596_TPlot.pdf
MSTRG.23989.2:1472	nta-miR6024	MSTRG.23989.2	MSTRG.23989	LOC107806042	PREDICTED: L-type lectin-domain containing receptor kinase VII.1-like [Nicotiana tabacum]	GO:0004674(protein serine/threonine kinase activity);GO:0005524(ATP binding);GO:0005886(plasma membrane);GO:0006468(protein phosphorylation);GO:0016021(integral component of membrane);GO:0016301(kinase activity);GO:0030246(carbohydrate binding)	00500(Starch and sucrose metabolism)	1482	1472	0.775623	6.5	(((.((((((((((.(((((((((&)))))))))-))))))))))-)))	GGGCAAGACAAUUCUUGGCUGAGA&UUUUAGCCA-GAGUUGUUUU-CCC	2	192.567	2	0.254928	Output/DS_TL/cleaveLand_result/t_plot/nta-miR6024_MSTRG.23989.2_1472_TPlot.pdf
XM_016632768.1:1366	nta-miR160d	XM_016632768.1	107808261	LOC107808261	PREDICTED: heat stress transcription factor B-2b-like [Nicotiana tabacum]	GO:0005634(nucleus);GO:0005634(nucleus)	NA	1375	1366	0.763713	6	.(((.(((.((((((((((((.&.)))))))))))).)))-))).	GGGUGAUGGGGGGAGCCGGGCU&UGCCUGGCUCCCUGCAU-GCCA	6	577.701	2	0.254928	Output/DS_TL/cleaveLand_result/t_plot/nta-miR160d_XM_016632768.1_1366_TPlot.pdf
XM_016644580.1:148	nta-miR6020a-5p	XM_016644580.1	MSTRG.4361	LOC107818550	PREDICTED: TMV resistance protein N-like [Nicotiana sylvestris]	GO:0005515(protein binding);GO:0005515(protein binding)	03040(Spliceosome);04141(Protein processing in endoplasmic reticulum);04144(Endocytosis);04144(Endocytosis)	157	148	1	1	(((((((((((((((((((((&)))))))))))))))))))))	GAAGAUACUCGGAAAACAUUU&AAAUGUUUUUCGAGUAUCUUC	2	192.567	2	0.254928	Output/DS_TL/cleaveLand_result/t_plot/nta-miR6020a-5p_XM_016644580.1_148_TPlot.pdf
XM_016647788.1:611	nta-miR6145f_L+1	XM_016647788.1	MSTRG.5258	LOC107821351	PREDICTED: isoflavone 2'-hydroxylase-like [Nicotiana sylvestris]	GO:0016020(membrane);GO:0016709(oxidoreductase activity, acting on paired donors, with incorporation or reduction of molecular oxygen, NAD(P)H as one donor, and incorporation of one atom of oxygen);GO:0042343(indole glucosinolate metabolic process);GO:0044550(secondary metabolite biosynthetic process);GO:0098542(defense response to other organism)	00903(Limonene and pinene degradation);00945(Stilbenoid, diarylheptanoid and gingerol biosynthesis)	620	611	0.666667	5.5	((((.(((((.(((((((((((&))))))))))).))))).))))	GCUGAUGCUGAAUGUUAUGAUG&UAUCGUAACAUAUAGCACUAGC	6	577.701	2	0.254928	Output/DS_TL/cleaveLand_result/t_plot/nta-miR6145f_L+1_XM_016647788.1_611_TPlot.pdf
XM_016577041.1:70	nta-miR398_L+2R-2	XM_016577041.1	MSTRG.9027	LOC107759169	PREDICTED: umecyanin-like [Nicotiana tomentosiformis]	GO:0046658(anchored component of plasma membrane)	NA	78	70	0.690476	5	.(((.(((((((((((-(((((&))))).)))))))))))-))).	AGGGACGACCUGAGGA-ACAUA&UAUGUGUUCUCAGGUCG-CCCC	2	192.567	3	0.258092	Output/DS_TL/cleaveLand_result/t_plot/nta-miR398_L+2R-2_XM_016577041.1_70_TPlot.pdf
XM_016611687.1:1644	nta-miR156g_L+1	XM_016611687.1	107789814	LOC107789814	squamosa promoter-binding-like protein 6 [Nicotiana tabacum]	GO:0003677(DNA binding);GO:0003700(transcription factor activity, sequence-specific DNA binding);GO:0005634(nucleus);GO:0006351(transcription, DNA-templated);GO:0006355(regulation of transcription, DNA-templated);GO:0010468(regulation of gene expression);GO:0042742(defense response to bacterium);GO:0046872(metal ion binding)	NA	1653	1644	0.898072	3	(((((((((.((((((((((.&.)))))))))).)))))))))	GUGCUCUCUCUCUUCUGUCAU&UUGACAGAAGAUAGAGAGCAC	2	192.567	3	0.258092	Output/DS_TL/cleaveLand_result/t_plot/nta-miR156g_L+1_XM_016611687.1_1644_TPlot.pdf
XM_016579417.1:81	nta-miR6020a-5p	XM_016579417.1	107761218	LOC107761218	PREDICTED: LOW QUALITY PROTEIN: uncharacterized protein LOC107761218, partial [Nicotiana tabacum]	GO:0005515(protein binding)	03040(Spliceosome);04141(Protein processing in endoplasmic reticulum);04144(Endocytosis)	90	81	1	1	(((((((((((((((((((((&)))))))))))))))))))))	GAAGAUACUCGGAAAACAUUU&AAAUGUUUUUCGAGUAUCUUC	10	962.835	2	0.2644	Output/DS_TL/cleaveLand_result/t_plot/nta-miR6020a-5p_XM_016579417.1_81_TPlot.pdf
XM_016585004.1:2424	nta-miR6025a	XM_016585004.1	107766250	LOC107766250	PREDICTED: G-type lectin S-receptor-like serine/threonine-protein kinase CES101 isoform X3 [Nicotiana tomentosiformis]	GO:0004674(protein serine/threonine kinase activity);GO:0005886(plasma membrane);GO:0006468(protein phosphorylation);GO:0006952(defense response);GO:0009506(plasmodesma)	00520(Amino sugar and nucleotide sugar metabolism)	2433	2424	0.824615	4	((((((((((((((..((((((&))))))..))))))))))))))	GAUGUUAUCUCAAUGCUUGGUA&UACCAACAAUUGAGAUAACAUC	2	192.567	2	0.2644	Output/DS_TL/cleaveLand_result/t_plot/nta-miR6025a_XM_016585004.1_2424_TPlot.pdf
XM_016588080.1:1074	nta-miR156f	XM_016588080.1	MSTRG.12091	LOC107768912	teosinte glume architecture 1-like [Nicotiana tabacum]	GO:0003677(DNA binding);GO:0003700(transcription factor activity, sequence-specific DNA binding);GO:0005634(nucleus);GO:0006351(transcription, DNA-templated);GO:0006355(regulation of transcription, DNA-templated);GO:0046872(metal ion binding);GO:0048653(anther development);GO:0048653(anther development)	NA	1083	1074	0.902579	2	((((((..((((((((((((&))))))))))))..))))))	GUGCUCUCUCUCUUCUGUCA&UGACAGAAGAGAAUGAGCAC	2	192.567	2	0.2644	Output/DS_TL/cleaveLand_result/t_plot/nta-miR156f_XM_016588080.1_1074_TPlot.pdf
MSTRG.6757.1:831	nta-MIR6154a-p5	MSTRG.6757.1	MSTRG.6757	LOC107826033	PREDICTED: glycine-rich cell wall structural protein 1.8-like [Nicotiana tabacum]	NA	NA	839	831	0.702765	7	((((((..((((.((((((-((((&)))).))))))-))))-.))))))	GGUGGAGCCUACGCUGGAG-GAGG&CCUUACUCCAG-GUAG-AUCCACC	1	96.2835	4	0.267517	Output/DS_TL/cleaveLand_result/t_plot/nta-MIR6154a-p5_MSTRG.6757.1_831_TPlot.pdf
XM_016600203.1:262	nta-MIR6144-p3	XM_016600203.1	MSTRG.15699	LOC107779725	PREDICTED: phospholipase D alpha 1 [Nicotiana tomentosiformis]	GO:0034638(phosphatidylcholine catabolic process);GO:0034638(phosphatidylcholine catabolic process)	00564(Glycerophospholipid metabolism);00565(Ether lipid metabolism);04144(Endocytosis);04144(Endocytosis)	271	262	0.857585	3.5	(((((..((((((((((((((&))))))))))))))..)))))	GGUGGCCACUUCUUCAGCAAG&CUUGUUGAAGAAGUUUCCAUC	1	96.2835	4	0.267517	Output/DS_TL/cleaveLand_result/t_plot/nta-MIR6144-p3_XM_016600203.1_262_TPlot.pdf
XM_016605495.1:1674	nta-miR172c	XM_016605495.1	107784366	LOC107784366	PREDICTED: AP2-like ethylene-responsive transcription factor TOE3 isoform X1 [Nicotiana tabacum]	GO:0003677(DNA binding);GO:0003700(transcription factor activity, sequence-specific DNA binding);GO:0005634(nucleus);GO:0006351(transcription, DNA-templated);GO:0006355(regulation of transcription, DNA-templated);GO:0009908(flower development);GO:0010073(meristem maintenance);GO:0010093(specification of floral organ identity);GO:0019953(sexual reproduction);GO:0030154(cell differentiation);GO:004…	NA	1683	1674	0.997085	2	.((((((((((((((((((((&)))))))))))))))))))).	CUGCAGCAUCAUCAGGAUUCU&AGAAUCUUGAUGAUGCUGCAU	1	96.2835	4	0.267517	Output/DS_TL/cleaveLand_result/t_plot/nta-miR172c_XM_016605495.1_1674_TPlot.pdf
XM_016636646.1:372	nta-miR6019a	XM_016636646.1	107811675	LOC107811675	PREDICTED: TMV resistance protein N-like [Nicotiana tabacum]	GO:0005515(protein binding);GO:0005515(protein binding)	03040(Spliceosome);04141(Protein processing in endoplasmic reticulum);04144(Endocytosis);04144(Endocytosis)	381	372	0.858025	6	(((((((((((((((((((...&...)))))))))))))))))))	AAACAUUUACAGGUCACCUCUU&UACAGGUGACUUGUAAAUGUUU	1	96.2835	4	0.267517	Output/DS_TL/cleaveLand_result/t_plot/nta-miR6019a_XM_016636646.1_372_TPlot.pdf
XM_016651174.1:1586	nta-miR156g_L+1	XM_016651174.1	107824419	LOC107824419	PREDICTED: squamosa promoter-binding-like protein 3 [Nicotiana tomentosiformis]	GO:0003677(DNA binding);GO:0003700(transcription factor activity, sequence-specific DNA binding);GO:0005634(nucleus);GO:0006351(transcription, DNA-templated);GO:0006355(regulation of transcription, DNA-templated);GO:0044212(transcription regulatory region DNA binding);GO:0046872(metal ion binding);GO:0048510(regulation of timing of transition from vegetative to reproductive phase);GO:0048653(anth…	NA	1595	1586	0.92562	2	(((((((((.(((((((((((&))))))))))).)))))))))	GUGCUCUCUCUCUUCUGUCAA&UUGACAGAAGAUAGAGAGCAC	1	96.2835	4	0.267517	Output/DS_TL/cleaveLand_result/t_plot/nta-miR156g_L+1_XM_016651174.1_1586_TPlot.pdf
MSTRG.8315.2:571	nta-miR482a	MSTRG.8315.2	MSTRG.8315	LOC107830733	PREDICTED: photosystem II stability/assembly factor HCF136, chloroplastic [Nicotiana tomentosiformis]	GO:0006461(protein complex assembly);GO:0009507(chloroplast);GO:0009523(photosystem II);GO:0009533(chloroplast stromal thylakoid);GO:0009534(chloroplast thylakoid);GO:0009535(chloroplast thylakoid membrane);GO:0009543(chloroplast thylakoid lumen);GO:0009570(chloroplast stroma);GO:0009579(thylakoid);GO:0009657(plastid organization);GO:0009735(response to cytokinin);GO:0009941(chloroplast envelope)…	NA	582	571	0.753351	6	.(((((-(((((((..((((((((&))))))))--))))))).))))).	AAGGAA-GGGUGGAUUAUUGGAAA&UUUCCAAU--UCCACCCAUUCCUA	2	192.567	3	0.270523	Output/DS_TL/cleaveLand_result/t_plot/nta-miR482a_MSTRG.8315.2_571_TPlot.pdf
XM_016610162.1:1666	nta-miR396a	XM_016610162.1	MSTRG.18481	LOC107788482	PREDICTED: pentatricopeptide repeat-containing protein At3g02650, mitochondrial [Nicotiana tomentosiformis]	NA	NA	1675	1666	0.831909	3	((((.((((((((((((((((&)))))))))))))))).))))	CAGUAUGAGAAGGCUGUGGAA&UUCCACAGCUUUCUUGAACUG	6	577.701	2	0.273752	Output/DS_TL/cleaveLand_result/t_plot/nta-miR396a_XM_016610162.1_1666_TPlot.pdf
XM_016585429.1:2120	nta-MIR6145e-p3	XM_016585429.1	MSTRG.11432	LOC107766618	PREDICTED: cyclin-T1-3-like [Nicotiana sylvestris]	GO:0000307(cyclin-dependent protein kinase holoenzyme complex);GO:0005634(nucleus);GO:0016538(cyclin-dependent protein serine/threonine kinase regulator activity);GO:0045737(positive regulation of cyclin-dependent protein serine/threonine kinase activity);GO:0045944(positive regulation of transcription from RNA polymerase II promoter);GO:1901409(positive regulation of phosphorylation of RNA polym…	04122(Sulfur relay system)	2128	2120	0.703704	6	(((..(((((((((-(((((&))))).)))))))))..)))	GGAGGGUCGCAUGA-UACGG&CCGUGCUCAUGUGACAAUCC	2	192.567	3	0.274621	Output/DS_TL/cleaveLand_result/t_plot/nta-MIR6145e-p3_XM_016585429.1_2120_TPlot.pdf
XM_016646187.1:210	nta-MIR396c-p3	XM_016646187.1	MSTRG.4821	LOC107819989	PREDICTED: 30S ribosomal protein S17, chloroplastic [Nicotiana sylvestris]	GO:0003735(structural constituent of ribosome);GO:0006412(translation);GO:0022627(cytosolic small ribosomal subunit)	03010(Ribosome)	219	210	0.747692	6	..((((.(((((((((((..&..))))))))))).))))..	UCUCCCCCAGCUUUCUUGCC&UUCAAGAAAGCUGUGGGAAA	4	385.134	3	0.274621	Output/DS_TL/cleaveLand_result/t_plot/nta-MIR396c-p3_XM_016646187.1_210_TPlot.pdf
XR_001646338.1:122	nta-MIR477a-p3	XR_001646338.1	MSTRG.15196	LOC107778150	PREDICTED: arabinogalactan peptide 22-like [Nicotiana sylvestris]	NA	NA	131	122	0.691038	5.5	(.((((((.(((((((((((((&))))))))))))).)))))).)	CGGCUCUCUUUCGAGAGAUCUU&GAGGUCUUUCGAGUGAGAGUGG	2	192.567	3	0.278695	Output/DS_TL/cleaveLand_result/t_plot/nta-MIR477a-p3_XR_001646338.1_122_TPlot.pdf
XM_016584659.1:558	nta-MIR5303c-p3_2ss19TA23TC	XM_016584659.1	MSTRG.11252	LOC107765960	PREDICTED: probable solanesyl-diphosphate synthase 3, chloroplastic [Nicotiana tabacum]	GO:0006744(ubiquinone biosynthetic process);GO:0008299(isoprenoid biosynthetic process);GO:0009507(chloroplast);GO:0009536(plastid);GO:0009570(chloroplast stroma);GO:0010236(plastoquinone biosynthetic process);GO:0015979(photosynthesis);GO:0046872(metal ion binding);GO:0050347(trans-octaprenyltranstransferase activity);GO:0052924(all-trans-nonaprenyl-diphosphate synthase (geranylgeranyl-diphospha…	00900(Terpenoid backbone biosynthesis)	567	558	0.672619	7	((((..((.(((((.(((((((((&))))))))).))))).))..))))	AGUGGGGUGGCGCCAGUGUUGGAU&AUCCGACACGGGUGCGGCAACACU	2	192.567	3	0.282746	Output/DS_TL/cleaveLand_result/t_plot/nta-MIR5303c-p3_2ss19TA23TC_XM_016584659.1_558_TPlot.pdf
XM_016614401.1:551	nta-MIR156j-p3	XM_016614401.1	MSTRG.19649	LOC107792209	PREDICTED: neurogenic protein mastermind-like [Nicotiana tabacum]	GO:0005737(cytoplasm);GO:0030001(metal ion transport);GO:0046914(transition metal ion binding);GO:0046916(cellular transition metal ion homeostasis)	NA	560	551	0.753281	6	.(((-((((((((((((((((&)))))))))))))))).))).	CAUG-CAGAGGUAUGGGGAGC&GCUCUCUAUGCUUCUGUCAUC	3	288.85	3	0.282746	Output/DS_TL/cleaveLand_result/t_plot/nta-MIR156j-p3_XM_016614401.1_551_TPlot.pdf
XM_016578847.1:1016	nta-miR6145d	XM_016578847.1	MSTRG.9541	LOC107760748	PREDICTED: protein TWIN LOV 1 isoform X1 [Nicotiana tomentosiformis]	GO:0004674(protein serine/threonine kinase activity);GO:0005634(nucleus);GO:0005737(cytoplasm);GO:0035556(intracellular signal transduction);GO:0035556(intracellular signal transduction)	NA	1025	1016	0.753012	6	(((((((((((-((.((((((.&.))))))-)).)))))))))))	GCCAGUGUUGC-UGUUAACAAC&AUUGUUA-CAUGUAACACUGGC	7	673.984	2	0.282985	Output/DS_TL/cleaveLand_result/t_plot/nta-miR6145d_XM_016578847.1_1016_TPlot.pdf
XM_016588934.1:903	nta-miR171b	XM_016588934.1	MSTRG.1251	LOC107769694	PREDICTED: scarecrow-like protein 15 [Nicotiana tabacum]	GO:0003700(transcription factor activity, sequence-specific DNA binding);GO:0005634(nucleus);GO:0006355(regulation of transcription, DNA-templated);GO:0030154(cell differentiation);GO:0043565(sequence-specific DNA binding);GO:0048831(regulation of shoot system development)	04075(Plant hormone signal transduction)	912	903	0.766497	4	.((((((.((((.((((((((&)))))))).)))).)))))).	UGUGAUACUGGCACGGCUCAA&UUGAGCCGCGCCAAUAUCACU	3	288.85	2	0.282985	Output/DS_TL/cleaveLand_result/t_plot/nta-miR171b_XM_016588934.1_903_TPlot.pdf
XM_016597080.1:1019	nta-MIR319a-p5	XM_016597080.1	107777099	LOC107777099	PREDICTED: non-lysosomal glucosylceramidase [Nicotiana sylvestris]	GO:0004348(glucosylceramidase activity);GO:0005886(plasma membrane);GO:0006680(glucosylceramide catabolic process);GO:0016021(integral component of membrane)	00600(Sphingolipid metabolism);00511(Other glycan degradation)	1027	1019	0.719128	6	.(((((((-(((-((((((((.&.)))))))).))).))))))).	GGGAUGGG-GAG-CGGCAGCAU&UUGCUGCCGACUCAUUCAUCCA	2	192.567	2	0.282985	Output/DS_TL/cleaveLand_result/t_plot/nta-MIR319a-p5_XM_016597080.1_1019_TPlot.pdf
MSTRG.6434.1:1073	nta-MIR6158a-p3	MSTRG.6434.1	MSTRG.6434	LOC107825127	PREDICTED: eukaryotic peptide chain release factor subunit 1-3-like [Nicotiana tomentosiformis]	GO:0003747(translation release factor activity);GO:0005737(cytoplasm);GO:0006415(translational termination);GO:0016149(translation release factor activity, codon specific);GO:0040008(regulation of growth)	03015(mRNA surveillance pathway)	1082	1073	0.735751	6	(((.(((((((((((((.((((&)))).))))))))))))).)))	GCUGAGAUUCUGGCUAAUGUGA&UUACUUUGGCCAGAGUUUGAGC	1	96.2835	4	0.283626	Output/DS_TL/cleaveLand_result/t_plot/nta-MIR6158a-p3_MSTRG.6434.1_1073_TPlot.pdf
XM_016580047.1:3233	nta-miR167d	XM_016580047.1	MSTRG.9878	LOC107761773	PREDICTED: auxin response factor 6-like isoform X2 [Nicotiana tabacum]	GO:0003677(DNA binding);GO:0003700(transcription factor activity, sequence-specific DNA binding);GO:0005515(protein binding);GO:0005634(nucleus);GO:0006351(transcription, DNA-templated);GO:0006355(regulation of transcription, DNA-templated);GO:0009733(response to auxin);GO:0009734(auxin-activated signaling pathway);GO:0009908(flower development);GO:0009908(flower development)	04075(Plant hormone signal transduction);04075(Plant hormone signal transduction)	3242	3233	0.796915	5	.((((((.(((((((((((..&..))))))))))).)))))).	GAGAUCAGGCUGGCAGCUUGU&UGAAGCUGCCAGCAUGAUCUA	1	96.2835	4	0.283626	Output/DS_TL/cleaveLand_result/t_plot/nta-miR167d_XM_016580047.1_3233_TPlot.pdf
XM_016586559.1:623	nta-miR398_L+2R-2	XM_016586559.1	MSTRG.11683	LOC107767528	PREDICTED: superoxide dismutase [Cu-Zn], chloroplastic-like [Nicotiana tabacum]	GO:0004784(superoxide dismutase activity);GO:0005507(copper ion binding);GO:0005737(cytoplasm);GO:0008270(zinc ion binding);GO:0019430(removal of superoxide radicals)	04146(Peroxisome)	631	623	0.728571	4.5	.((((((((((((((-(((((&))))).)))))))))))))).	CGGGUGACCUGGGAA-ACAUA&UAUGUGUUCUCAGGUCGCCCC	1	96.2835	4	0.283626	Output/DS_TL/cleaveLand_result/t_plot/nta-miR398_L+2R-2_XM_016586559.1_623_TPlot.pdf
XM_016610502.1:961	nta-miR482b-3p	XM_016610502.1	107788791	LOC107788791	PREDICTED: putative late blight resistance protein homolog R1A-10 isoform X1 [Nicotiana tomentosiformis]	GO:0005524(ATP binding);GO:0006952(defense response);GO:0043531(ADP binding);GO:0043531(ADP binding)	04626(Plant-pathogen interaction);04626(Plant-pathogen interaction)	970	961	0.866505	3	((((((((.((((((((((((.&.)))))))))))).))))))))	GGGAUGGGCGGCAUUGGCAAGU&UCUUGCCAAUGCCAUCCAUUCC	1	96.2835	4	0.283626	Output/DS_TL/cleaveLand_result/t_plot/nta-miR482b-3p_XM_016610502.1_961_TPlot.pdf
XM_016636647.1:372	nta-miR6019a	XM_016636647.1	107811675	LOC107811675	PREDICTED: TMV resistance protein N-like [Nicotiana tabacum]	GO:0005515(protein binding);GO:0005515(protein binding)	03040(Spliceosome);04141(Protein processing in endoplasmic reticulum);04144(Endocytosis);04144(Endocytosis)	381	372	0.858025	6	(((((((((((((((((((...&...)))))))))))))))))))	AAACAUUUACAGGUCACCUCUU&UACAGGUGACUUGUAAAUGUUU	1	96.2835	4	0.283626	Output/DS_TL/cleaveLand_result/t_plot/nta-miR6019a_XM_016636647.1_372_TPlot.pdf
XM_016651177.1:1417	nta-miR156g_L+1	XM_016651177.1	107824419	LOC107824419	PREDICTED: squamosa promoter-binding-like protein 3 [Nicotiana tomentosiformis]	GO:0003677(DNA binding);GO:0003700(transcription factor activity, sequence-specific DNA binding);GO:0005634(nucleus);GO:0006351(transcription, DNA-templated);GO:0006355(regulation of transcription, DNA-templated);GO:0044212(transcription regulatory region DNA binding);GO:0046872(metal ion binding);GO:0048510(regulation of timing of transition from vegetative to reproductive phase);GO:0048653(anth…	NA	1426	1417	0.92562	2	(((((((((.(((((((((((&))))))))))).)))))))))	GUGCUCUCUCUCUUCUGUCAA&UUGACAGAAGAUAGAGAGCAC	1	96.2835	4	0.283626	Output/DS_TL/cleaveLand_result/t_plot/nta-miR156g_L+1_XM_016651177.1_1417_TPlot.pdf
XM_016660734.1:104	nta-miR394	XM_016660734.1	MSTRG.8935	LOC107832840	PREDICTED: glycine-rich protein 2 [Nicotiana tomentosiformis]	GO:0003676(nucleic acid binding);GO:0003690(double-stranded DNA binding);GO:0003697(single-stranded DNA binding);GO:0003729(mRNA binding);GO:0005634(nucleus);GO:0005730(nucleolus);GO:0005737(cytoplasm);GO:0005829(cytosol);GO:0005886(plasma membrane);GO:0006355(regulation of transcription, DNA-templated);GO:0008270(zinc ion binding);GO:0009269(response to desiccation);GO:0009409(response to cold);…	03013(RNA transport)	113	104	0.767857	5	((((.((((((((((.(((((&))))).))))))))))-))))	GGAGAGUGGACAGAGGGCUAA&UUGGCAUUCUGUCCAC-CUCC	1	96.2835	4	0.283626	Output/DS_TL/cleaveLand_result/t_plot/nta-miR394_XM_016660734.1_104_TPlot.pdf
MSTRG.9671.1:225	nta-miR6020a-5p	MSTRG.9671.1	MSTRG.9671	.	0	NA	NA	234	225	0.989247	1	(((((((((((((((((((((&)))))))))))))))))))))	GAAGAUACUCGAAAAAUAUUU&AAAUGUUUUUCGAGUAUCUUC	13	1251.68	2	0.2921	Output/DS_TL/cleaveLand_result/t_plot/nta-miR6020a-5p_MSTRG.9671.1_225_TPlot.pdf
XM_016577663.1:890	nta-miR171b	XM_016577663.1	MSTRG.9198	LOC107759671	PREDICTED: scarecrow-like protein 15 [Nicotiana tabacum]	GO:0003700(transcription factor activity, sequence-specific DNA binding);GO:0005634(nucleus);GO:0006355(regulation of transcription, DNA-templated);GO:0030154(cell differentiation);GO:0043565(sequence-specific DNA binding);GO:0048831(regulation of shoot system development)	04075(Plant hormone signal transduction)	899	890	0.766497	4	.((((((.((((.((((((((&)))))))).)))).)))))).	UGUGAUACUGGCACGGCUCAA&UUGAGCCGCGCCAAUAUCACU	34	3273.64	2	0.2921	Output/DS_TL/cleaveLand_result/t_plot/nta-miR171b_XM_016577663.1_890_TPlot.pdf
XM_016578848.1:996	nta-miR6145d	XM_016578848.1	MSTRG.9541	LOC107760748	PREDICTED: protein TWIN LOV 1 isoform X1 [Nicotiana tomentosiformis]	GO:0004674(protein serine/threonine kinase activity);GO:0005634(nucleus);GO:0005737(cytoplasm);GO:0035556(intracellular signal transduction);GO:0035556(intracellular signal transduction)	NA	1005	996	0.753012	6	(((((((((((-((.((((((.&.))))))-)).)))))))))))	GCCAGUGUUGC-UGUUAACAAC&AUUGUUA-CAUGUAACACUGGC	3	288.85	2	0.2921	Output/DS_TL/cleaveLand_result/t_plot/nta-miR6145d_XM_016578848.1_996_TPlot.pdf
XM_016618324.1:541	nta-miR396b	XM_016618324.1	MSTRG.20759	LOC107795650	PREDICTED: low-temperature-induced cysteine proteinase-like [Nicotiana tabacum]	GO:0004197(cysteine-type endopeptidase activity);GO:0005615(extracellular space);GO:0005764(lysosome);GO:0051603(proteolysis involved in cellular protein catabolic process)	04145(Phagosome)	550	541	0.874251	3.5	(((.(((((((((((((((((&))))))))))))))))).)))	AGGAUCAAGGAAGCUGUGGGA&UUCCACAGCUUUCUUGAACUU	9	866.551	2	0.2921	Output/DS_TL/cleaveLand_result/t_plot/nta-miR396b_XM_016618324.1_541_TPlot.pdf
XM_016633447.1:953	nta-MIR319a-p5	XM_016633447.1	107808883	LOC107808883	PREDICTED: non-lysosomal glucosylceramidase-like [Nicotiana tabacum]	GO:0004348(glucosylceramidase activity);GO:0005886(plasma membrane);GO:0006680(glucosylceramide catabolic process);GO:0016021(integral component of membrane)	00600(Sphingolipid metabolism);00511(Other glycan degradation)	961	953	0.719128	6	.(((((((-(((-((((((((.&.)))))))).))).))))))).	GGGAUGGG-GAG-CGGCAGCAU&UUGCUGCCGACUCAUUCAUCCA	3	288.85	2	0.2921	Output/DS_TL/cleaveLand_result/t_plot/nta-MIR319a-p5_XM_016633447.1_953_TPlot.pdf
XM_016649160.1:1193	nta-miR397_R+1	XM_016649160.1	107822620	LOC107822620	PREDICTED: pentatricopeptide repeat-containing protein At1g80150, mitochondrial-like isoform X1 [Nicotiana tabacum]	GO:0003674(molecular_function);GO:0005739(mitochondrion);GO:0008150(biological_process)	NA	1202	1193	0.808625	3	(.((.((((((((((((((((.&.))))))))))))))))-)).)	GUCAUUCAACGCUGCACUCAAG&AUUGAGUGCAGCGUUGA-UGUC	2	192.567	2	0.2921	Output/DS_TL/cleaveLand_result/t_plot/nta-miR397_R+1_XM_016649160.1_1193_TPlot.pdf
XM_016580372.1:2581	nta-miR167a_L+1R-1	XM_016580372.1	MSTRG.9972	LOC107762058	PREDICTED: auxin response factor 6-like isoform X2 [Nicotiana tabacum]	GO:0003677(DNA binding);GO:0003700(transcription factor activity, sequence-specific DNA binding);GO:0005515(protein binding);GO:0005634(nucleus);GO:0006351(transcription, DNA-templated);GO:0006355(regulation of transcription, DNA-templated);GO:0009733(response to auxin);GO:0009734(auxin-activated signaling pathway);GO:0009908(flower development);GO:0009908(flower development)	04075(Plant hormone signal transduction);04075(Plant hormone signal transduction)	2590	2581	0.754854	7	.((((((.(((((((((((...&...))))))))))).)))))).	GAGAUCAGGCUGGCAGCUUGUA&UUGAAGCUGCCAGCAUGAUCUG	1	96.2835	4	0.29938	Output/DS_TL/cleaveLand_result/t_plot/nta-miR167a_L+1R-1_XM_016580372.1_2581_TPlot.pdf
XM_016613047.1:3996	nta-MIR6162-p3	XM_016613047.1	107791053	LOC107791053	PREDICTED: uncharacterized protein LOC104234829 isoform X3 [Nicotiana sylvestris]	GO:0003674(molecular_function);GO:0005634(nucleus);GO:0005773(vacuole);GO:0005829(cytosol);GO:0005886(plasma membrane);GO:0008150(biological_process);GO:0016021(integral component of membrane);GO:0016021(integral component of membrane)	NA	4005	3996	0.834286	4.5	.(((((((((((((((((((.&.))))))))))))))))))).	ACAGAGAAAUGGAGGCUCUUA&CAAGGGCUUCCAUUUUUCUGA	1	96.2835	4	0.29938	Output/DS_TL/cleaveLand_result/t_plot/nta-MIR6162-p3_XM_016613047.1_3996_TPlot.pdf
XM_016623570.1:1706	nta-miR168d	XM_016623570.1	107800406	LOC107800406	PREDICTED: cyprosin-like isoform X1 [Nicotiana tabacum]	GO:0004190(aspartic-type endopeptidase activity);GO:0006508(proteolysis);GO:0030163(protein catabolic process);GO:0030163(protein catabolic process)	NA	1715	1706	0.73913	6.5	(((((..(((((((((..(((((&)))))..)))))))))--)))))	UUCCCCGGACCUGCACAUAGCGG&UCGCUUGGUGCAGGUC--GGGAA	1	96.2835	4	0.29938	Output/DS_TL/cleaveLand_result/t_plot/nta-miR168d_XM_016623570.1_1706_TPlot.pdf
XM_016657993.1:453	nta-MIR408-p5	XM_016657993.1	MSTRG.8226	LOC107830448	PREDICTED: glutathione S-transferase omega-like 2 [Nicotiana sylvestris]	GO:0004364(glutathione transferase activity);GO:0009507(chloroplast);GO:0016740(transferase activity)	NA	462	453	0.72381	6	((((..(((((((((((((((.&.)))))))))))))))-.))))	CGUGGGUCUGCCUUGUCCUUGG&ACAGGGACGAGGUAGA-GCAUG	1	96.2835	4	0.29938	Output/DS_TL/cleaveLand_result/t_plot/nta-MIR408-p5_XM_016657993.1_453_TPlot.pdf
XM_016614855.1:2999	nta-miR6156	XM_016614855.1	107792617	LOC107792617	PREDICTED: putative calcium-transporting ATPase 13, plasma membrane-type [Nicotiana tabacum]	GO:0005388(calcium-transporting ATPase activity);GO:0005887(integral component of plasma membrane);GO:0043231(intracellular membrane-bounded organelle)	00190(Oxidative phosphorylation)	3008	2999	0.652027	6	(.(((((.(((((((((((((&))))))))))))).))))).)	GGAGAAGAAGAACGUUUUCGA&UUGAAGAUGUUCUAUUUCUGU	3	288.85	1	0.299414	Output/DS_TL/cleaveLand_result/t_plot/nta-miR6156_XM_016614855.1_2999_TPlot.pdf
XM_016599809.1:521	nta-MIR166c-p5	XM_016599809.1	MSTRG.15572	LOC107779378	PREDICTED: protein IQ-DOMAIN 1-like [Nicotiana tabacum]	GO:0005516(calmodulin binding);GO:0005634(nucleus);GO:0005886(plasma membrane);GO:0008150(biological_process);GO:0008150(biological_process)	NA	530	521	0.743935	5.5	....((.((((((((((((((&)))))))))))))).))....	UUAAGAUUCAGACAGCAUUCC&GGAAUGCUGUCUGGUUCGAAA	2	192.567	2	0.3011	Output/DS_TL/cleaveLand_result/t_plot/nta-MIR166c-p5_XM_016599809.1_521_TPlot.pdf
XM_016626964.1:1174	nta-miR156f	XM_016626964.1	107803280	LOC107803280	PREDICTED: squamosa promoter-binding-like protein 16 [Nicotiana tabacum]	GO:0003677(DNA binding);GO:0003700(transcription factor activity, sequence-specific DNA binding);GO:0005634(nucleus);GO:0006351(transcription, DNA-templated);GO:0006355(regulation of transcription, DNA-templated);GO:0046872(metal ion binding);GO:0048653(anther development);GO:0048653(anther development)	NA	1183	1174	0.902579	2	((((((..((((((((((((&))))))))))))..))))))	GUGCUCUCUCUCUUCUGUCA&UGACAGAAGAGAAUGAGCAC	2	192.567	2	0.3011	Output/DS_TL/cleaveLand_result/t_plot/nta-miR156f_XM_016626964.1_1174_TPlot.pdf
XM_016627507.1:129	nta-miR6145d	XM_016627507.1	MSTRG.23270	LOC107803743	PREDICTED: protein TWIN LOV 1-like, partial [Nicotiana tabacum]	GO:0004674(protein serine/threonine kinase activity);GO:0005634(nucleus);GO:0005737(cytoplasm);GO:0035556(intracellular signal transduction)	NA	138	129	0.75	7	((((((((((((..((((((.&.))))))..))))))))))))	GCCAGUGUUGCGGUUAACAAC&AUUGUUACAUGUAACACUGGC	3	288.85	2	0.3011	Output/DS_TL/cleaveLand_result/t_plot/nta-miR6145d_XM_016627507.1_129_TPlot.pdf
XM_016653587.1:269	nta-miR6020a-5p	XM_016653587.1	MSTRG.6958	LOC107826598	PREDICTED: TMV resistance protein N-like [Nicotiana tabacum]	GO:0005515(protein binding)	03040(Spliceosome);04141(Protein processing in endoplasmic reticulum);04144(Endocytosis)	278	269	0.989247	1	(((((((((((((((((((((&)))))))))))))))))))))	GAAGAUACUCGAAAAAUAUUU&AAAUGUUUUUCGAGUAUCUUC	3	288.85	2	0.3011	Output/DS_TL/cleaveLand_result/t_plot/nta-miR6020a-5p_XM_016653587.1_269_TPlot.pdf
MSTRG.23579.1:1676	nta-MIR6025c-p5	MSTRG.23579.1	MSTRG.23579	LOC107804804	PREDICTED: exocyst complex component EXO70B1 [Nicotiana tabacum];PREDICTED: GDSL esterase/lipase At1g58430-like [Nicotiana tomentosiformis]	GO:0000145(exocyst);GO:0005737(cytoplasm);GO:0005829(cytosol);GO:0005886(plasma membrane);GO:0006887(exocytosis);GO:0006904(vesicle docking involved in exocytosis);GO:0045335(phagocytic vesicle);GO:0070062(extracellular exosome);GO:0005576(extracellular region);GO:0016042(lipid catabolic process);GO:0016788(hydrolase activity, acting on ester bonds);GO:0052689(carboxylic ester hydrolase activity)	NA	1685	1676	0.713433	6	..((((((((((((.((((((&)))))).))))))))))))..	UGAGUUGGGAUUACUUCUAGG&CCUGGAUGUAAUCUCAAUUGU	2	192.567	3	0.306582	Output/DS_TL/cleaveLand_result/t_plot/nta-MIR6025c-p5_MSTRG.23579.1_1676_TPlot.pdf
MSTRG.15511.1:1297	nta-miR162a	MSTRG.15511.1	MSTRG.15511	LOC107779189	PREDICTED: WPP domain-interacting tail-anchored protein 2 [Nicotiana sylvestris]	GO:0003674(molecular_function);GO:0005634(nucleus);GO:0008150(biological_process);GO:0016021(integral component of membrane)	NA	1307	1297	0.712	7	..(((((((((((((.(((.((&)).)))-)))))))))))))..	GAGGGUGCAGAGGUUAUAUGGG&UCGAUA-AACCUCUGCAUCCAG	2	192.567	2	0.309985	Output/DS_TL/cleaveLand_result/t_plot/nta-miR162a_MSTRG.15511.1_1297_TPlot.pdf
MSTRG.6757.1:429	nta-MIR167c-p3	MSTRG.6757.1	MSTRG.6757	LOC107826033	PREDICTED: glycine-rich cell wall structural protein 1.8-like [Nicotiana tabacum]	NA	NA	437	429	0.794521	6.5	..(((((((((-((((((((.&.)))))))).)))))))))..	UAUGGAGCUGC-AGGUGACCA&AGGUCAUCUAGCAGCUUCAAU	3	288.85	2	0.309985	Output/DS_TL/cleaveLand_result/t_plot/nta-MIR167c-p3_MSTRG.6757.1_429_TPlot.pdf
XM_016588079.1:1272	nta-miR156f	XM_016588079.1	MSTRG.12091	LOC107768912	teosinte glume architecture 1-like [Nicotiana tabacum]	GO:0003677(DNA binding);GO:0003700(transcription factor activity, sequence-specific DNA binding);GO:0005634(nucleus);GO:0006351(transcription, DNA-templated);GO:0006355(regulation of transcription, DNA-templated);GO:0046872(metal ion binding);GO:0048653(anther development);GO:0048653(anther development)	NA	1281	1272	0.902579	2	((((((..((((((((((((&))))))))))))..))))))	GUGCUCUCUCUCUUCUGUCA&UGACAGAAGAGAAUGAGCAC	3	288.85	2	0.309985	Output/DS_TL/cleaveLand_result/t_plot/nta-miR156f_XM_016588079.1_1272_TPlot.pdf
XM_016617892.1:266	nta-MIR319a-p5	XM_016617892.1	MSTRG.20652	LOC107795284	PREDICTED: ruvB-like protein 1 [Nicotiana sylvestris]	GO:0005515(protein binding);GO:0005524(ATP binding);GO:0005634(nucleus);GO:0005730(nucleolus);GO:0005829(cytosol);GO:0009507(chloroplast);GO:0009908(flower development);GO:0030154(cell differentiation);GO:0043141(ATP-dependent 5'-3' DNA helicase activity);GO:0048507(meristem development);GO:2000072(regulation of defense response to fungus, incompatible interaction)	04141(Protein processing in endoplasmic reticulum);04120(Ubiquitin mediated proteolysis)	276	266	0.716707	6	(((((..(((((((.((((((((&))))))))-)))))))..)))))	UGGAUUUGUGGGUCAGGCAGCAG&UUGCUGCC-GACUCAUUCAUCCA	2	192.567	2	0.309985	Output/DS_TL/cleaveLand_result/t_plot/nta-MIR319a-p5_XM_016617892.1_266_TPlot.pdf
MSTRG.14516.1:528	nta-miR168a_R+1	MSTRG.14516.1	MSTRG.14516	.	0	NA	NA	537	528	0.720739	4.5	((((((((-(((((((((((((&))))))))))))).))))))))	GGUCUUGG-CUGCGCCAAGUGA&UCGCUUGGUGCAGGUCGGGACC	1	96.2835	4	0.314787	Output/DS_TL/cleaveLand_result/t_plot/nta-miR168a_R+1_MSTRG.14516.1_528_TPlot.pdf
XM_016579308.1:426	nta-MIR408-p5	XM_016579308.1	MSTRG.9645	LOC107761137	PREDICTED: glutathionyl-hydroquinone reductase YqjG-like [Nicotiana tabacum]	GO:0004364(glutathione transferase activity);GO:0009507(chloroplast);GO:0016740(transferase activity)	NA	435	426	0.72381	6	((((..(((((((((((((((.&.)))))))))))))))-.))))	CGUGGGUCUGCCUUGUCCUUGG&ACAGGGACGAGGUAGA-GCAUG	1	96.2835	4	0.314787	Output/DS_TL/cleaveLand_result/t_plot/nta-MIR408-p5_XM_016579308.1_426_TPlot.pdf
XM_016600207.1:213	nta-MIR6144-p3	XM_016600207.1	MSTRG.15699	LOC107779725	PREDICTED: phospholipase D alpha 1 [Nicotiana tomentosiformis]	GO:0034638(phosphatidylcholine catabolic process);GO:0034638(phosphatidylcholine catabolic process)	00564(Glycerophospholipid metabolism);00565(Ether lipid metabolism);04144(Endocytosis);04144(Endocytosis)	222	213	0.857585	3.5	(((((..((((((((((((((&))))))))))))))..)))))	GGUGGCCACUUCUUCAGCAAG&CUUGUUGAAGAAGUUUCCAUC	1	96.2835	4	0.314787	Output/DS_TL/cleaveLand_result/t_plot/nta-MIR6144-p3_XM_016600207.1_213_TPlot.pdf
XM_016610503.1:961	nta-miR482b-3p	XM_016610503.1	107788791	LOC107788791	PREDICTED: putative late blight resistance protein homolog R1A-10 isoform X1 [Nicotiana tomentosiformis]	GO:0005524(ATP binding);GO:0006952(defense response);GO:0043531(ADP binding);GO:0043531(ADP binding)	04626(Plant-pathogen interaction);04626(Plant-pathogen interaction)	970	961	0.866505	3	((((((((.((((((((((((.&.)))))))))))).))))))))	GGGAUGGGCGGCAUUGGCAAGU&UCUUGCCAAUGCCAUCCAUUCC	1	96.2835	4	0.314787	Output/DS_TL/cleaveLand_result/t_plot/nta-miR482b-3p_XM_016610503.1_961_TPlot.pdf
XM_016623841.1:1051	nta-miR6155	XM_016623841.1	MSTRG.22280	LOC107800635	PREDICTED: mitochondrial adenine nucleotide transporter ADNT1-like [Nicotiana sylvestris]	GO:0003735(structural constituent of ribosome);GO:0006412(translation)	04144(Endocytosis)	1059	1051	0.823684	6.5	.(((((((((((((-((((..&..)))).))))))))))))).	GGCGAGAGCAAGGC-ACCUCU&UAAGGUUGCCUUGCUCUUGCA	1	96.2835	4	0.314787	Output/DS_TL/cleaveLand_result/t_plot/nta-miR6155_XM_016623841.1_1051_TPlot.pdf
XM_016640551.1:1288	nta-miR169q_R-1_1ss7AG	XM_016640551.1	107815042	LOC107815042	PREDICTED: nuclear transcription factor Y subunit A-10-like isoform X4 [Nicotiana tabacum]	GO:0003677(DNA binding);GO:0003700(transcription factor activity, sequence-specific DNA binding);GO:0005634(nucleus);GO:0006351(transcription, DNA-templated);GO:0006355(regulation of transcription, DNA-templated);GO:0009567(double fertilization forming a zygote and endosperm);GO:0016602(CCAAT-binding factor complex);GO:0016602(CCAAT-binding factor complex)	NA	1297	1288	0.757143	4	.(((-((((((((((((((.&.)))))))))))))).))).	AGGC-AGUCAUCCUUGGCUA&CAGCCAGGGAUGACUUGCCG	1	96.2835	4	0.314787	Output/DS_TL/cleaveLand_result/t_plot/nta-miR169q_R-1_1ss7AG_XM_016640551.1_1288_TPlot.pdf
XM_016651175.1:2110	nta-miR156g_L+1	XM_016651175.1	107824419	LOC107824419	PREDICTED: squamosa promoter-binding-like protein 3 [Nicotiana tomentosiformis]	GO:0003677(DNA binding);GO:0003700(transcription factor activity, sequence-specific DNA binding);GO:0005634(nucleus);GO:0006351(transcription, DNA-templated);GO:0006355(regulation of transcription, DNA-templated);GO:0044212(transcription regulatory region DNA binding);GO:0046872(metal ion binding);GO:0048510(regulation of timing of transition from vegetative to reproductive phase);GO:0048653(anth…	NA	2119	2110	0.92562	2	(((((((((.(((((((((((&))))))))))).)))))))))	GUGCUCUCUCUCUUCUGUCAA&UUGACAGAAGAUAGAGAGCAC	1	96.2835	4	0.314787	Output/DS_TL/cleaveLand_result/t_plot/nta-miR156g_L+1_XM_016651175.1_2110_TPlot.pdf
XM_016602887.1:998	nta-miR6146b	XM_016602887.1	MSTRG.16469	LOC107782055	PREDICTED: protein EXORDIUM-like 5 [Nicotiana tomentosiformis]	GO:0003674(molecular_function);GO:0005576(extracellular region);GO:0005615(extracellular space);GO:0008150(biological_process);GO:0048046(apoplast)	NA	1007	998	0.684385	7	((((((((---(((((((((((&)))))))))))...))))))))	GGUGGGUA---CAUUGGACAGG&UUUGUCCAAUGAAAUACUUAUC	3	288.85	3	0.3182	Output/DS_TL/cleaveLand_result/t_plot/nta-miR6146b_XM_016602887.1_998_TPlot.pdf
XM_016628734.1:1676	nta-MIR6025c-p5	XM_016628734.1	MSTRG.23579	LOC107804802	PREDICTED: exocyst complex component EXO70B1 [Nicotiana tabacum];PREDICTED: GDSL esterase/lipase At1g58430-like [Nicotiana tomentosiformis]	GO:0000145(exocyst);GO:0005737(cytoplasm);GO:0005829(cytosol);GO:0005886(plasma membrane);GO:0006887(exocytosis);GO:0006904(vesicle docking involved in exocytosis);GO:0045335(phagocytic vesicle);GO:0070062(extracellular exosome);GO:0005576(extracellular region);GO:0016042(lipid catabolic process);GO:0016788(hydrolase activity, acting on ester bonds);GO:0052689(carboxylic ester hydrolase activity)	NA	1685	1676	0.713433	6	..((((((((((((.((((((&)))))).))))))))))))..	UGAGUUGGGAUUACUUCUAGG&CCUGGAUGUAAUCUCAAUUGU	2	192.567	3	0.3182	Output/DS_TL/cleaveLand_result/t_plot/nta-MIR6025c-p5_XM_016628734.1_1676_TPlot.pdf
XM_016588081.1:1077	nta-miR156f	XM_016588081.1	MSTRG.12091	LOC107768912	teosinte glume architecture 1-like [Nicotiana tabacum]	GO:0003677(DNA binding);GO:0003700(transcription factor activity, sequence-specific DNA binding);GO:0005634(nucleus);GO:0006351(transcription, DNA-templated);GO:0006355(regulation of transcription, DNA-templated);GO:0046872(metal ion binding);GO:0048653(anther development);GO:0048653(anther development)	NA	1086	1077	0.902579	2	((((((..((((((((((((&))))))))))))..))))))	GUGCUCUCUCUCUUCUGUCA&UGACAGAAGAGAAUGAGCAC	3	288.85	2	0.318757	Output/DS_TL/cleaveLand_result/t_plot/nta-miR156f_XM_016588081.1_1077_TPlot.pdf
XM_016627784.1:927	nta-MIR6146b-p3	XM_016627784.1	MSTRG.23337	LOC107803983	PREDICTED: pentatricopeptide repeat-containing protein At1g30610, chloroplastic [Nicotiana tomentosiformis]	GO:0009507(chloroplast);GO:0009793(embryo development ending in seed dormancy);GO:0010098(suspensor development)	NA	936	927	0.730159	6.5	.(((((((((.((((((((((.&.))))))))))-))))))))).	GCUUUGUUCACGUGAACGCUUC&UAAGUGUUCAU-UGGACAAAGA	5	481.417	2	0.318757	Output/DS_TL/cleaveLand_result/t_plot/nta-MIR6146b-p3_XM_016627784.1_927_TPlot.pdf
XM_016650896.1:345	nta-miR6020a-3p	XM_016650896.1	107824159	LOC107824159	PREDICTED: protein SYS1 homolog isoform X2 [Nicotiana tomentosiformis]	GO:0000042(protein targeting to Golgi);GO:0005802(trans-Golgi network);GO:0006895(Golgi to endosome transport);GO:0030173(integral component of Golgi membrane);GO:0043001(Golgi to plasma membrane protein transport)	NA	354	345	0.716511	6	(((((((.((((.(((((((((&))))))))).)))).)))))))	GUGAGUGCUUUGGUGAGUGUUU&AGAUACUCAGCAAAACAUUUAC	3	288.85	2	0.318757	Output/DS_TL/cleaveLand_result/t_plot/nta-miR6020a-3p_XM_016650896.1_345_TPlot.pdf
MSTRG.2.1:548	nta-MIR396c-p3	MSTRG.2.1	MSTRG.2	trnK	0	NA	NA	557	548	0.738462	6.5	....(((((((((((((((.&.)))))))))))))))....	GCUACCGCAGUUUUCUUGAU&UUCAAGAAAGCUGUGGGAAA	3	288.85	3	0.325838	Output/DS_TL/cleaveLand_result/t_plot/nta-MIR396c-p3_MSTRG.2.1_548_TPlot.pdf
XM_016586368.1:1867	nta-MIR6145b-p3	XM_016586368.1	107767374	LOC107767374	PREDICTED: DNA-binding protein SMUBP-2-like isoform X1 [Nicotiana tabacum]	GO:0003677(DNA binding);GO:0004386(helicase activity);GO:0005524(ATP binding);GO:0005634(nucleus);GO:0005634(nucleus)	03013(RNA transport);03015(mRNA surveillance pathway);03015(mRNA surveillance pathway)	1876	1867	0.714286	6	((((.(((((((((((((..(&)..))))))))))))).))))	GUUGCUGUUACACGAGCAAGG&CAGUGCUCGUGUAAUAAUAAC	2	192.567	2	0.327418	Output/DS_TL/cleaveLand_result/t_plot/nta-MIR6145b-p3_XM_016586368.1_1867_TPlot.pdf
XM_016611026.1:474	nta-miR171c	XM_016611026.1	MSTRG.18718	LOC107789251	PREDICTED: pre-mRNA-splicing factor 18 [Nicotiana sylvestris]	GO:0000350(generation of catalytic spliceosome for second transesterification step);GO:0000386(second spliceosomal transesterification activity);GO:0005682(U5 snRNP);GO:0046540(U4/U6 x U5 tri-snRNP complex);GO:0071021(U2-type post-spliceosomal complex);GO:0071048(nuclear retention of unspliced pre-mRNA at the site of transcription)	03040(Spliceosome)	483	474	0.749333	6.5	((((-(((((.(((((((((.&.))))))))).))))).))))	GAUG-UGGCGAGGCUCGAUCG&UGAUUGAGCCGUGCCAAUAUC	2	192.567	2	0.327418	Output/DS_TL/cleaveLand_result/t_plot/nta-miR171c_XM_016611026.1_474_TPlot.pdf
XM_016614852.1:2305	nta-miR6145c_L+1	XM_016614852.1	MSTRG.19769	LOC107792615	PREDICTED: E3 ubiquitin-protein ligase MBR2-like [Nicotiana tabacum]	GO:0043161(proteasome-mediated ubiquitin-dependent protein catabolic process);GO:0061630(ubiquitin protein ligase activity);GO:0061630(ubiquitin protein ligase activity)	03013(RNA transport);03013(RNA transport)	2314	2305	0.72619	6.5	..((((...(((((((((((((&)))))))))))))-..))))..	GCAUUGGGAAUGUGUGCACUGG&CCAGUGCACAUAU-AACAGUAA	2	192.567	2	0.327418	Output/DS_TL/cleaveLand_result/t_plot/nta-miR6145c_L+1_XM_016614852.1_2305_TPlot.pdf
MSTRG.4379.1:89	nta-miR319a_R-1	MSTRG.4379.1	MSTRG.4379	LOC107818593	0	NA	NA	99	89	0.75	7	.((((((((((((((.(((..&..)))-)))))))))))))).	AGGAGCUCCCUUCAGCUUCUU&UUGGA-CUGAAGGGAGCUCCC	2	192.567	3	0.329625	Output/DS_TL/cleaveLand_result/t_plot/nta-miR319a_R-1_MSTRG.4379.1_89_TPlot.pdf
XM_016593128.1:806	nta-miR167a_L+1R-1	XM_016593128.1	MSTRG.1372	LOC107773708	PREDICTED: 1-aminocyclopropane-1-carboxylate oxidase-like [Nicotiana tabacum]	GO:0051213(dioxygenase activity);GO:0051213(dioxygenase activity)	00904(Diterpenoid biosynthesis);00904(Diterpenoid biosynthesis)	816	806	0.716019	6.5	(((((.((((((((((.((((((&))))))-)))))))))).)))))	CAGAUGGUGUUGGUGGACUUCAG&UUGAAG-CUGCCAGCAUGAUCUG	3	288.85	3	0.329625	Output/DS_TL/cleaveLand_result/t_plot/nta-miR167a_L+1R-1_XM_016593128.1_806_TPlot.pdf
XM_016591448.1:511	nta-MIR169m-p3_1ss18AG	XM_016591448.1	MSTRG.13050	LOC107771978	PREDICTED: splicing factor U2af large subunit A-like isoform X4 [Nicotiana sylvestris]	GO:0000243(commitment complex);GO:0008187(poly-pyrimidine tract binding);GO:0016607(nuclear speck);GO:0030628(pre-mRNA 3'-splice site binding);GO:0071004(U2-type prespliceosome);GO:0089701(U2AF);GO:0089701(U2AF)	03040(Spliceosome);03040(Spliceosome)	518	511	0.719258	6	(((((((((((((--(((((.&.)))))..)))))))))))))	UCCCUGGCUGCAA--CACUUG&AGAGUGGAUUGCAGCCAGGGA	1	96.2835	4	0.329856	Output/DS_TL/cleaveLand_result/t_plot/nta-MIR169m-p3_1ss18AG_XM_016591448.1_511_TPlot.pdf
XM_016593009.1:230	nta-miR6019a	XM_016593009.1	MSTRG.13731	LOC107773608	PREDICTED: protein NUCLEAR FUSION DEFECTIVE 6, chloroplastic/mitochondrial-like [Nicotiana tabacum]	GO:0003674(molecular_function);GO:0005739(mitochondrion);GO:0008150(biological_process)	NA	239	230	0.830247	5.5	..((((((.(((((((((((((&))))))))))))).))))))..	UCGCAUUUUCAGGUCGCCUGUA&UACAGGUGACUUGUAAAUGUUU	1	96.2835	4	0.329856	Output/DS_TL/cleaveLand_result/t_plot/nta-miR6019a_XM_016593009.1_230_TPlot.pdf
XM_016623569.1:1757	nta-miR168d	XM_016623569.1	107800406	LOC107800406	PREDICTED: cyprosin-like isoform X1 [Nicotiana tabacum]	GO:0004190(aspartic-type endopeptidase activity);GO:0006508(proteolysis);GO:0030163(protein catabolic process);GO:0030163(protein catabolic process)	NA	1766	1757	0.73913	6.5	(((((..(((((((((..(((((&)))))..)))))))))--)))))	UUCCCCGGACCUGCACAUAGCGG&UCGCUUGGUGCAGGUC--GGGAA	1	96.2835	4	0.329856	Output/DS_TL/cleaveLand_result/t_plot/nta-miR168d_XM_016623569.1_1757_TPlot.pdf
XM_016633712.1:536	nta-miR6021	XM_016633712.1	MSTRG.24968	LOC107809115	PREDICTED: kinesin-13A-like isoform X1 [Nicotiana tabacum]	GO:0003777(microtubule motor activity);GO:0005871(kinesin complex);GO:0007018(microtubule-based movement);GO:0016887(ATPase activity);GO:0016887(ATPase activity)	04144(Endocytosis);04144(Endocytosis)	545	536	0.808786	5	((((((((((((((((.((((&)))).))))))))))))))))	UCCAAUGGCAGCUUCUACCGG&UUGGAAGAGGCUGCUAUUGGA	1	96.2835	4	0.329856	Output/DS_TL/cleaveLand_result/t_plot/nta-miR6021_XM_016633712.1_536_TPlot.pdf
XR_001648705.1:969	nta-miR482b-3p	XR_001648705.1	107788791	LOC107788791	PREDICTED: putative late blight resistance protein homolog R1A-10 isoform X1 [Nicotiana tomentosiformis]	GO:0005524(ATP binding);GO:0006952(defense response);GO:0043531(ADP binding);GO:0043531(ADP binding)	04626(Plant-pathogen interaction);04626(Plant-pathogen interaction)	978	969	0.866505	3	((((((((.((((((((((((.&.)))))))))))).))))))))	GGGAUGGGCGGCAUUGGCAAGU&UCUUGCCAAUGCCAUCCAUUCC	1	96.2835	4	0.329856	Output/DS_TL/cleaveLand_result/t_plot/nta-miR482b-3p_XR_001648705.1_969_TPlot.pdf
MSTRG.16282.2:2493	nta-MIR6145a-p3	MSTRG.16282.2	MSTRG.16282	LOC107781513	PREDICTED: plasma membrane ATPase 2 [Nicotiana sylvestris]	GO:0005887(integral component of plasma membrane);GO:0008553(hydrogen-exporting ATPase activity, phosphorylative mechanism);GO:0043231(intracellular membrane-bounded organelle);GO:0051453(regulation of intracellular pH);GO:1902600(hydrogen ion transmembrane transport)	00190(Oxidative phosphorylation)	2502	2493	0.673171	6.5	.(((((((((.(((((((((.&.))))))))).))))))))).	UUUACCUUCAAGUGAGCACUA&CGGUGCUCAUGUGAAGGUGAC	2	192.567	3	0.33339	Output/DS_TL/cleaveLand_result/t_plot/nta-MIR6145a-p3_MSTRG.16282.2_2493_TPlot.pdf
XR_001645360.1:808	nta-miR167a_L+1R-1	XR_001645360.1	MSTRG.1372	LOC107773708	PREDICTED: 1-aminocyclopropane-1-carboxylate oxidase-like [Nicotiana tabacum]	GO:0051213(dioxygenase activity);GO:0051213(dioxygenase activity)	00904(Diterpenoid biosynthesis);00904(Diterpenoid biosynthesis)	818	808	0.716019	6.5	(((((.((((((((((.((((((&))))))-)))))))))).)))))	CAGAUGGUGUUGGUGGACUUCAG&UUGAAG-CUGCCAGCAUGAUCUG	2	192.567	3	0.33339	Output/DS_TL/cleaveLand_result/t_plot/nta-miR167a_L+1R-1_XR_001645360.1_808_TPlot.pdf
XM_016615793.1:1733	nta-MIR159-p5	XM_016615793.1	MSTRG.20064	LOC107793442	PREDICTED: SWI/SNF complex subunit SWI3D-like [Nicotiana tabacum]	GO:0003677(DNA binding);GO:0005515(protein binding);GO:0005634(nucleus);GO:0006338(chromatin remodeling);GO:0006351(transcription, DNA-templated);GO:0006355(regulation of transcription, DNA-templated);GO:0007275(multicellular organism development);GO:0016514(SWI/SNF complex)	NA	1742	1733	0.714286	7	((.(((((((..(((.(((((((&))))))).)))-.)))))))-))	GGCAAUCCAUCUGGUGAGCAGCU&AGCUGCUGACC-UAUGGAUU-CC	4	385.134	2	0.335968	Output/DS_TL/cleaveLand_result/t_plot/nta-MIR159-p5_XM_016615793.1_1733_TPlot.pdf
XM_016616359.1:1059	nta-MIR6161c-p3_1ss7AG	XM_016616359.1	MSTRG.20220	LOC107793912	PREDICTED: transcription factor Pur-alpha 1-like isoform X2 [Nicotiana tabacum]	GO:0003676(nucleic acid binding);GO:0003677(DNA binding);GO:0005634(nucleus);GO:0005737(cytoplasm);GO:0006351(transcription, DNA-templated);GO:0006355(regulation of transcription, DNA-templated);GO:0046686(response to cadmium ion);GO:0046686(response to cadmium ion)	NA	1067	1059	0.681319	7	.((((((((..-((-(((((((((&))))))))).))...)))))))).	GGCUGGAAGGA-AU-UACAGGUGC&GCACCUGUGUAUGAACUUCCAGCA	2	192.567	2	0.335968	Output/DS_TL/cleaveLand_result/t_plot/nta-MIR6161c-p3_1ss7AG_XM_016616359.1_1059_TPlot.pdf
XM_016626371.1:978	nta-miR396b	XM_016626371.1	107802800	LOC107802800	PREDICTED: growth-regulating factor 4-like isoform X2 [Nicotiana tomentosiformis]	GO:0005524(ATP binding);GO:0005634(nucleus);GO:0006351(transcription, DNA-templated);GO:0006355(regulation of transcription, DNA-templated);GO:0048366(leaf development);GO:0048366(leaf development)	NA	988	978	0.868263	4	..(((((((((((.((((((((&))))))))-)))))))))))..	CCGUUCAAGAAAGCCUGUGGAA&UUCCACAG-CUUUCUUGAACUU	7	673.984	2	0.335968	Output/DS_TL/cleaveLand_result/t_plot/nta-miR396b_XM_016626371.1_978_TPlot.pdf
MSTRG.11213.1:2486	nta-MIR6145a-p3	MSTRG.11213.1	MSTRG.11213	LOC107765797	PREDICTED: plasma membrane ATPase 2-like [Nicotiana tabacum]	GO:0005887(integral component of plasma membrane);GO:0008553(hydrogen-exporting ATPase activity, phosphorylative mechanism);GO:0043231(intracellular membrane-bounded organelle);GO:0051453(regulation of intracellular pH);GO:1902600(hydrogen ion transmembrane transport)	00190(Oxidative phosphorylation)	2495	2486	0.673171	6.5	.(((((((((.(((((((((.&.))))))))).))))))))).	UUUACCUUCAAGUGAGCACUA&CGGUGCUCAUGUGAAGGUGAC	2	192.567	3	0.340857	Output/DS_TL/cleaveLand_result/t_plot/nta-MIR6145a-p3_MSTRG.11213.1_2486_TPlot.pdf
XM_016623148.1:618	nta-miR6024	XM_016623148.1	MSTRG.22070	LOC107800007	PREDICTED: zinc finger protein 4-like [Nicotiana tabacum]	GO:0003676(nucleic acid binding);GO:0003700(transcription factor activity, sequence-specific DNA binding);GO:0005634(nucleus);GO:0006355(regulation of transcription, DNA-templated);GO:0008270(zinc ion binding);GO:0044212(transcription regulatory region DNA binding);GO:0046872(metal ion binding)	NA	627	618	0.731302	6.5	.((((((.(((((((((.((((&)))).))))))))).)))))).	AGGGAGAGGACUCUGGCAAAGA&UUUUAGCCAGAGUUGUUUUCCC	2	192.567	3	0.340857	Output/DS_TL/cleaveLand_result/t_plot/nta-miR6024_XM_016623148.1_618_TPlot.pdf
XM_016652011.1:2037	nta-miR319a_R-1	XM_016652011.1	MSTRG.6457	LOC107825184	PREDICTED: alkane hydroxylase MAH1-like [Nicotiana tabacum]	GO:0004497(monooxygenase activity);GO:0005506(iron ion binding);GO:0005576(extracellular region);GO:0016021(integral component of membrane);GO:0016705(oxidoreductase activity, acting on paired donors, with incorporation or reduction of molecular oxygen);GO:0020037(heme binding);GO:0055114(oxidation-reduction process)	00073(Cutin, suberine and wax biosynthesis)	2046	2037	0.747596	4.5	((((.(((((.(((((((((((&)))))))))))-)))))-))))	GGGACGUUCCUCUUUAGUCCAA&UUGGACUGAAG-GGAGC-UCCC	2	192.567	3	0.340857	Output/DS_TL/cleaveLand_result/t_plot/nta-miR319a_R-1_XM_016652011.1_2037_TPlot.pdf
XM_016589657.1:1130	nta-MIR6145b-p3	XM_016589657.1	MSTRG.12533	LOC107770355	PREDICTED: 26S proteasome non-ATPase regulatory subunit 4 homolog [Nicotiana tabacum]	GO:0005634(nucleus);GO:0005829(cytosol);GO:0008540(proteasome regulatory particle, base subcomplex);GO:0031593(polyubiquitin binding);GO:0043161(proteasome-mediated ubiquitin-dependent protein catabolic process);GO:0043248(proteasome assembly)	03050(Proteasome)	1140	1130	0.698758	6	..(((((.((((((((.(((((&)))))-)))))))).)))))..	AAUGUUGCUACACGAGACACUG&CAGUG-CUCGUGUAAUAAUAAC	22	2118.24	2	0.34441	Output/DS_TL/cleaveLand_result/t_plot/nta-MIR6145b-p3_XM_016589657.1_1130_TPlot.pdf
XM_016613190.1:1942	nta-miR482b-3p	XM_016613190.1	107791176	LOC107791176	PREDICTED: putative late blight resistance protein homolog R1B-16 [Nicotiana tabacum]	GO:0005524(ATP binding);GO:0006952(defense response);GO:0043531(ADP binding);GO:0043531(ADP binding)	04626(Plant-pathogen interaction);04626(Plant-pathogen interaction)	1951	1942	0.84466	3	((((((((.(((((((((((((&))))))))))))).))))))))	GGGAUGGGGGGCAUUGGUAAGA&UCUUGCCAAUGCCAUCCAUUCC	2	192.567	2	0.34441	Output/DS_TL/cleaveLand_result/t_plot/nta-miR482b-3p_XM_016613190.1_1942_TPlot.pdf
XR_001647386.1:2807	nta-miR160a	XR_001647386.1	MSTRG.16790	LOC107783088	PREDICTED: uncharacterized protein LOC104101283 [Nicotiana tomentosiformis]	NA	NA	2816	2807	0.839207	4	...(((((((((((((((((.&.)))))))))))))))))...	CCACAUACAGGGAGCCAGGCG&UGCCUGGCUCCCUGUAUGCCA	2	192.567	2	0.34441	Output/DS_TL/cleaveLand_result/t_plot/nta-miR160a_XR_001647386.1_2807_TPlot.pdf
XM_016648127.1:407	nta-MIR156c-p3_1ss22TC	XM_016648127.1	MSTRG.5366	LOC107821687	PREDICTED: CAX-interacting protein 4 [Nicotiana sylvestris]	GO:0003676(nucleic acid binding);GO:0005634(nucleus);GO:0005737(cytoplasm);GO:0008270(zinc ion binding);GO:0051928(positive regulation of calcium ion transport);GO:0051928(positive regulation of calcium ion transport)	NA	416	407	0.676404	7	((-((((.((((((((.(((((((&))))))).))))))))-)))).))	GG-GGCAUGCAAGAGGUGUGGGCG&UGCUCACUUCUCUUGC-UGUCACC	3	288.85	3	0.34456	Output/DS_TL/cleaveLand_result/t_plot/nta-MIR156c-p3_1ss22TC_XM_016648127.1_407_TPlot.pdf
MSTRG.24406.2:927	nta-miR479a	MSTRG.24406.2	MSTRG.24406	LOC107807272	PREDICTED: aquaporin NIP1-1-like isoform X1 [Nicotiana tabacum]	GO:0005887(integral component of plasma membrane);GO:0009992(cellular water homeostasis);GO:0015250(water channel activity);GO:0015254(glycerol channel activity);GO:0034220(ion transmembrane transport);GO:0034220(ion transmembrane transport)	NA	936	927	0.734748	7	((((...(((((((((((((((.(&).)))))))))))))))--.))))	GAUGUUUGCCGGACCGAUAUCAGG&CGUGAUAUUGGUUUGGC--UCAUC	1	96.2835	4	0.344594	Output/DS_TL/cleaveLand_result/t_plot/nta-miR479a_MSTRG.24406.2_927_TPlot.pdf
XM_016602812.1:574	nta-miR156g_L+1	XM_016602812.1	107781982	LOC107781982	PREDICTED: squamosa promoter-binding-like protein 2 [Nicotiana sylvestris]	GO:0003677(DNA binding);GO:0003700(transcription factor activity, sequence-specific DNA binding);GO:0005634(nucleus);GO:0006351(transcription, DNA-templated);GO:0006355(regulation of transcription, DNA-templated);GO:0044212(transcription regulatory region DNA binding);GO:0046872(metal ion binding);GO:0048510(regulation of timing of transition from vegetative to reproductive phase);GO:0048653(anth…	NA	583	574	0.922865	2	(((((((((.(((((((((((&))))))))))).)))))))))	GUGCUCUCUCUCUUCUGUCAA&UUGACAGAAGAUAGAGAGCAC	1	96.2835	4	0.344594	Output/DS_TL/cleaveLand_result/t_plot/nta-miR156g_L+1_XM_016602812.1_574_TPlot.pdf
XM_016610155.1:2397	nta-miR408	XM_016610155.1	MSTRG.18479	LOC107788472	PREDICTED: copper-transporting ATPase PAA2, chloroplastic-like [Nicotiana tabacum]	GO:0005887(integral component of plasma membrane);GO:0043231(intracellular membrane-bounded organelle);GO:0043682(copper-transporting ATPase activity)	00190(Oxidative phosphorylation)	2407	2397	0.789357	3	((.((((((((((((((.((((&))))-)))))))))))))).))	AGACAGGGAAGAGGCAGUUGCA&UGCA-CUGCCUCUUCCCUGGCU	1	96.2835	4	0.344594	Output/DS_TL/cleaveLand_result/t_plot/nta-miR408_XM_016610155.1_2397_TPlot.pdf
XM_016613042.1:4509	nta-MIR6162-p3	XM_016613042.1	107791053	LOC107791053	PREDICTED: uncharacterized protein LOC104234829 isoform X3 [Nicotiana sylvestris]	GO:0003674(molecular_function);GO:0005634(nucleus);GO:0005773(vacuole);GO:0005829(cytosol);GO:0005886(plasma membrane);GO:0008150(biological_process);GO:0016021(integral component of membrane);GO:0016021(integral component of membrane)	NA	4518	4509	0.834286	4.5	.(((((((((((((((((((.&.))))))))))))))))))).	ACAGAGAAAUGGAGGCUCUUA&CAAGGGCUUCCAUUUUUCUGA	1	96.2835	4	0.344594	Output/DS_TL/cleaveLand_result/t_plot/nta-MIR6162-p3_XM_016613042.1_4509_TPlot.pdf
XM_016634436.1:937	nta-miR156f	XM_016634436.1	107809759	LOC107809759	PREDICTED: squamosa promoter-binding-like protein 9 [Nicotiana tabacum]	GO:0003677(DNA binding);GO:0003700(transcription factor activity, sequence-specific DNA binding);GO:0005634(nucleus);GO:0005737(cytoplasm);GO:0006351(transcription, DNA-templated);GO:0006355(regulation of transcription, DNA-templated);GO:0010228(vegetative to reproductive phase transition of meristem);GO:0046872(metal ion binding);GO:0048366(leaf development);GO:0048653(anther development);GO:200…	04075(Plant hormone signal transduction)	946	937	0.905444	2	((((((..((((((((((((&))))))))))))..))))))	GUGCUCUCUCUCUUCUGUCA&UGACAGAAGAGAAUGAGCAC	1	96.2835	4	0.344594	Output/DS_TL/cleaveLand_result/t_plot/nta-miR156f_XM_016634436.1_937_TPlot.pdf
XM_016637923.1:3062	nta-miR167a_L+1R-1	XM_016637923.1	MSTRG.26046	LOC107812758	PREDICTED: auxin response factor 8-like isoform X2 [Nicotiana tabacum]	GO:0003677(DNA binding);GO:0003700(transcription factor activity, sequence-specific DNA binding);GO:0005634(nucleus);GO:0006351(transcription, DNA-templated);GO:0006355(regulation of transcription, DNA-templated);GO:0009733(response to auxin);GO:0009734(auxin-activated signaling pathway);GO:0009908(flower development);GO:0009908(flower development)	04075(Plant hormone signal transduction);04075(Plant hormone signal transduction)	3071	3062	0.752427	7	.((((((.(((((((((((...&...))))))))))).)))))).	AAGAUCAGGCUGGCAGCUUGUA&UUGAAGCUGCCAGCAUGAUCUG	1	96.2835	4	0.344594	Output/DS_TL/cleaveLand_result/t_plot/nta-miR167a_L+1R-1_XM_016637923.1_3062_TPlot.pdf
XM_016650574.1:1373	nta-MIR6158b-p5	XM_016650574.1	MSTRG.6061	LOC107823871	PREDICTED: uncharacterized protein At1g26090, chloroplastic-like isoform X1 [Nicotiana tabacum]	GO:0005524(ATP binding);GO:0009507(chloroplast);GO:0010287(plastoglobule);GO:0016887(ATPase activity);GO:0016887(ATPase activity)	NA	1382	1373	0.676471	6.5	(((((((...((((-((((((((((&)))))))))).))))---)))))))	CAUGCCCGGUUUUG-ACAAAUCGGA&UUCGAUUUGUACGAA---GGGCAUG	1	96.2835	4	0.344594	Output/DS_TL/cleaveLand_result/t_plot/nta-MIR6158b-p5_XM_016650574.1_1373_TPlot.pdf
XM_016629770.1:2008	nta-MIR6146b-p3	XM_016629770.1	MSTRG.2405	LOC107805694	PREDICTED: phosphoenolpyruvate carboxykinase [ATP]-like [Nicotiana tabacum]	GO:0004612(phosphoenolpyruvate carboxykinase (ATP) activity);GO:0005829(cytosol);GO:0006094(gluconeogenesis)	01200(Carbon metabolism);00010(Glycolysis / Gluconeogenesis);00020(Citrate cycle (TCA cycle));00620(Pyruvate metabolism);00710(Carbon fixation in photosynthetic organisms)	2017	2008	0.685714	4.5	((((..(((.(((((((((((&))))))))))).)))..))))	UCUUGAUCCUAUGAACACUUG&UAAGUGUUCAUUGGACAAAGA	2	192.567	3	0.348241	Output/DS_TL/cleaveLand_result/t_plot/nta-MIR6146b-p3_XM_016629770.1_2008_TPlot.pdf
XM_016644576.1:14	nta-miR408	XM_016644576.1	MSTRG.4358	LOC107818546	PREDICTED: photosystem I reaction center subunit IV A, chloroplastic, partial [Nicotiana tabacum]	GO:0009507(chloroplast);GO:0009534(chloroplast thylakoid);GO:0009535(chloroplast thylakoid membrane);GO:0009538(photosystem I reaction center);GO:0009579(thylakoid);GO:0009735(response to cytokinin);GO:0009941(chloroplast envelope);GO:0010287(plastoglobule);GO:0015979(photosynthesis)	00195(Photosynthesis)	23	14	0.733925	6	(((((.(((((((((((.((.&.)).))))))))))).)))))	GGCCGCGGAAGAGGCGGCGCC&UGCACUGCCUCUUCCCUGGCU	6	577.701	3	0.348241	Output/DS_TL/cleaveLand_result/t_plot/nta-miR408_XM_016644576.1_14_TPlot.pdf
MSTRG.10921.2:176	nta-miR6020b	MSTRG.10921.2	MSTRG.10921	.	0	NA	NA	185	176	0.826797	2.5	(((((((((((((.(((((((&))))))).)))))))))))))	GGAGAUACUCGAACAACAUUU&AAAUGUUCUUCGAGUAUCUUC	24	2310.8	2	0.352745	Output/DS_TL/cleaveLand_result/t_plot/nta-miR6020b_MSTRG.10921.2_176_TPlot.pdf
MSTRG.16790.1:3256	nta-miR160a	MSTRG.16790.1	MSTRG.16790	LOC107783088	PREDICTED: uncharacterized protein LOC104101283 [Nicotiana tomentosiformis]	NA	NA	3265	3256	0.839207	4	...(((((((((((((((((.&.)))))))))))))))))...	CCACAUACAGGGAGCCAGGCG&UGCCUGGCUCCCUGUAUGCCA	6	577.701	2	0.352745	Output/DS_TL/cleaveLand_result/t_plot/nta-miR160a_MSTRG.16790.1_3256_TPlot.pdf
XM_016597339.1:718	nta-miR6025a	XM_016597339.1	107777341	LOC107777341	PREDICTED: putative late blight resistance protein homolog R1A-10 [Nicotiana tabacum]	GO:0005524(ATP binding);GO:0005886(plasma membrane);GO:0006952(defense response);GO:0043531(ADP binding)	04626(Plant-pathogen interaction)	727	718	0.772308	3	(((((((((.(((((((.((((&)))).))))))).)))))))))	GAUGUUAUCCCAAUUGUGGGUA&UACCAACAAUUGAGAUAACAUC	2	192.567	2	0.352745	Output/DS_TL/cleaveLand_result/t_plot/nta-miR6025a_XM_016597339.1_718_TPlot.pdf
XM_016648121.1:245	nta-miR396b	XM_016648121.1	107821683	LOC107821683	PREDICTED: growth-regulating factor 5-like [Nicotiana tabacum]	GO:0005524(ATP binding);GO:0005634(nucleus);GO:0006351(transcription, DNA-templated);GO:0006355(regulation of transcription, DNA-templated);GO:0048366(leaf development)	NA	255	245	0.868263	4	..(((((((((((.((((((((&))))))))-)))))))))))..	CCGUUCAAGAAAGCCUGUGGAA&UUCCACAG-CUUUCUUGAACUU	5	481.417	2	0.352745	Output/DS_TL/cleaveLand_result/t_plot/nta-miR396b_XM_016648121.1_245_TPlot.pdf
XM_016603222.1:807	nta-MIR156c-p3_1ss22TC	XM_016603222.1	MSTRG.16564	LOC107782346	PREDICTED: DEAD-box ATP-dependent RNA helicase 38-like [Nicotiana tabacum]	GO:0004004(ATP-dependent RNA helicase activity);GO:0006413(translational initiation);GO:0010468(regulation of gene expression);GO:0010501(RNA secondary structure unwinding)	03013(RNA transport)	817	807	0.723596	7	((((((((((((-(((..((((((&))))))-.))).))))))))))))	GGUGACAGCAAG-GAAACUGGGCA&UGCUCA-CUUCUCUUGCUGUCACC	1	96.2835	4	0.359007	Output/DS_TL/cleaveLand_result/t_plot/nta-MIR156c-p3_1ss22TC_XM_016603222.1_807_TPlot.pdf
XM_016617964.1:737	nta-MIR6151a-p3	XM_016617964.1	107795342	LOC107795342	PREDICTED: two-pore potassium channel 3-like [Nicotiana tabacum]	GO:0009705(plant-type vacuole membrane)	NA	746	737	0.732095	6.5	.(((..(((((((((((((((&)))))))))))))))..))).	UGUGCUUGUGGGGUUCGGGUU&AAUCCGAGCCCUACAUUCAUC	1	96.2835	4	0.359007	Output/DS_TL/cleaveLand_result/t_plot/nta-MIR6151a-p3_XM_016617964.1_737_TPlot.pdf
XM_016628100.1:2025	nta-MIR172e-p5	XM_016628100.1	107804251	LOC107804251	PREDICTED: floral homeotic protein APETALA 2-like [Nicotiana tabacum]	GO:0003677(DNA binding);GO:0003700(transcription factor activity, sequence-specific DNA binding);GO:0005634(nucleus);GO:0006351(transcription, DNA-templated);GO:0006355(regulation of transcription, DNA-templated);GO:0009908(flower development);GO:0010073(meristem maintenance);GO:0010093(specification of floral organ identity);GO:0019953(sexual reproduction);GO:0030154(cell differentiation);GO:004…	04075(Plant hormone signal transduction)	2034	2025	1	2	.(((((((((((((((((((&))))))))))))))))))).	CUGCAGCAUCAUCAGGAUUC&GAAUCUUGAUGAUGCUGCAU	1	96.2835	4	0.359007	Output/DS_TL/cleaveLand_result/t_plot/nta-MIR172e-p5_XM_016628100.1_2025_TPlot.pdf
XM_016601877.1:233	nta-MIR319a-p5	XM_016601877.1	MSTRG.16178	LOC107781207	PREDICTED: tetraspanin-19-like [Nicotiana tabacum]	NA	NA	242	233	0.675545	7	(((((((.(.(((.(((((((((.&.)))))))))-)))-).)))))))	UGGAUGAUUAGAGUUUGGCAGCGU&UUGCUGCCGA-CUC-AUUCAUCCA	2	192.567	3	0.359162	Output/DS_TL/cleaveLand_result/t_plot/nta-MIR319a-p5_XM_016601877.1_233_TPlot.pdf
XM_016640472.1:267	nta-miR827	XM_016640472.1	MSTRG.3180	LOC107814972	PREDICTED: uncharacterized protein LOC107814972 [Nicotiana tabacum]	GO:0006457(protein folding);GO:0009507(chloroplast)	04141(Protein processing in endoplasmic reticulum)	276	267	0.676871	7	.....((((((.((((((((((&))))))))))-)))))).....	UUGGAGUUGAUAGUUCAUCUAA&UUAGAUGAAC-AUCAACAAACA	3	288.85	3	0.359162	Output/DS_TL/cleaveLand_result/t_plot/nta-miR827_XM_016640472.1_267_TPlot.pdf
XM_016612181.1:33	nta-MIR477a-p3	XM_016612181.1	MSTRG.19019	LOC107790274	PREDICTED: 60S ribosomal protein L10a-1-like [Nicotiana tomentosiformis]	GO:0000470(maturation of LSU-rRNA);GO:0003723(RNA binding);GO:0006412(translation);GO:0022625(cytosolic large ribosomal subunit)	03010(Ribosome)	43	33	0.712264	6.5	((((((.(((((((((.(((.(((&)))-))).)))))))))-))))))	CCAUUCGUCACUCGAACGGCGCUC&GAG-GUCUUUCGAGUGA-GAGUGG	4	385.134	2	0.360973	Output/DS_TL/cleaveLand_result/t_plot/nta-MIR477a-p3_XM_016612181.1_33_TPlot.pdf
XM_016625737.1:1933	nta-MIR6164a-p3_2ss6TC21TC	XM_016625737.1	107802272	LOC107802272	PREDICTED: splicing factor U2af small subunit B-like [Nicotiana tabacum]	GO:0000166(nucleotide binding);GO:0000398(mRNA splicing, via spliceosome);GO:0003677(DNA binding);GO:0003723(RNA binding);GO:0005634(nucleus);GO:0005681(spliceosomal complex);GO:0016607(nuclear speck);GO:0046872(metal ion binding);GO:0048573(photoperiodism, flowering);GO:0089701(U2AF);GO:0089701(U2AF)	03040(Spliceosome);03040(Spliceosome)	1942	1933	0.708423	4.5	..((((((((((.(((((((((((&))))))))))).))))))))))..	GGUGUUUGAUUGAGCACGGAGUUU&AAACUCCGUGCCCAGUCAAACAGG	2	192.567	2	0.360973	Output/DS_TL/cleaveLand_result/t_plot/nta-MIR6164a-p3_2ss6TC21TC_XM_016625737.1_1933_TPlot.pdf
MSTRG.10921.1:168	nta-miR6020a-5p	MSTRG.10921.1	MSTRG.10921	.	0	NA	NA	177	168	0.90681	2.5	(((((((((((((.(((((((&))))))).)))))))))))))	GGAGAUACUCGAACAACAUUU&AAAUGUUUUUCGAGUAUCUUC	24	2310.8	2	0.369097	Output/DS_TL/cleaveLand_result/t_plot/nta-miR6020a-5p_MSTRG.10921.1_168_TPlot.pdf
XM_016612783.1:1031	nta-miR162a	XM_016612783.1	MSTRG.19203	LOC107790816	PREDICTED: serine/arginine-rich-splicing factor SR34 isoform X1 [Nicotiana tomentosiformis]	GO:0000166(nucleotide binding);GO:0003723(RNA binding);GO:0005515(protein binding);GO:0005634(nucleus);GO:0005681(spliceosomal complex);GO:0006397(mRNA processing);GO:0008380(RNA splicing);GO:0016607(nuclear speck);GO:0035061(interchromatin granule);GO:0035061(interchromatin granule)	03040(Spliceosome);03040(Spliceosome)	1040	1031	0.712	6	..(((-(((((((((((((..&..))))))))))))).)))..	UCGGA-GCAGAGGUUUAUCCA&UCGAUAAACCUCUGCAUCCAG	2	192.567	2	0.369097	Output/DS_TL/cleaveLand_result/t_plot/nta-miR162a_XM_016612783.1_1031_TPlot.pdf
XM_016599402.1:330	nta-MIR6025b-p5	XM_016599402.1	MSTRG.15477	LOC107779058	PREDICTED: uncharacterized protein LOC107779058, partial [Nicotiana tabacum]	GO:0005506(iron ion binding);GO:0009507(chloroplast);GO:0009534(chloroplast thylakoid);GO:0009535(chloroplast thylakoid membrane);GO:0009941(chloroplast envelope);GO:0016021(integral component of membrane);GO:0046872(metal ion binding)	NA	339	330	0.702247	6	.(((((((((((((((.((((&)))).))))))))))))))).	GAUGUUAACACUGGGAGAGCA&UGUUAUCUCAGUGUUGGCAUG	2	192.567	3	0.3699	Output/DS_TL/cleaveLand_result/t_plot/nta-MIR6025b-p5_XM_016599402.1_330_TPlot.pdf
XM_016645229.1:284	nta-miR827	XM_016645229.1	MSTRG.4552	LOC107819141	PREDICTED: uncharacterized protein LOC107819141 [Nicotiana tabacum]	GO:0006457(protein folding);GO:0009507(chloroplast)	04141(Protein processing in endoplasmic reticulum)	293	284	0.676871	7	.....((((((.((((((((((&))))))))))-)))))).....	UUGGAGUUGAUAGUUCAUCUAA&UUAGAUGAAC-AUCAACAAACA	2	192.567	3	0.3699	Output/DS_TL/cleaveLand_result/t_plot/nta-miR827_XM_016645229.1_284_TPlot.pdf
MSTRG.20556.1:460	nta-miR6145b_L+2R-1	MSTRG.20556.1	MSTRG.20556	LOC107794965	0	NA	NA	469	460	0.689655	6.5	((.((((((-((((((((((((&)))))))))))).)))))).))	GCCAGUGCU-UGUGUGGUGAUG&UAUUAUCAUACGUAGCACUAGC	1	96.2835	4	0.373103	Output/DS_TL/cleaveLand_result/t_plot/nta-miR6145b_L+2R-1_MSTRG.20556.1_460_TPlot.pdf
XM_016578086.1:1558	nta-miR160a	XM_016578086.1	107760064	LOC107760064	PREDICTED: auxin response factor 18-like isoform X2 [Nicotiana tabacum]	GO:0003677(DNA binding);GO:0003700(transcription factor activity, sequence-specific DNA binding);GO:0005634(nucleus);GO:0006351(transcription, DNA-templated);GO:0006355(regulation of transcription, DNA-templated);GO:0007389(pattern specification process);GO:0009734(auxin-activated signaling pathway);GO:0009738(abscisic acid-activated signaling pathway);GO:0009743(response to carbohydrate);GO:0010…	04075(Plant hormone signal transduction);04075(Plant hormone signal transduction)	1567	1558	0.859031	3	.(((((((((.((((((((((&)))))))))).))))))))).	AGGCAUACAGAGAGCCAGGCA&UGCCUGGCUCCCUGUAUGCCA	1	96.2835	4	0.373103	Output/DS_TL/cleaveLand_result/t_plot/nta-miR160a_XM_016578086.1_1558_TPlot.pdf
XM_016638929.1:271	nta-miR169t_R-1_1ss8GT	XM_016638929.1	MSTRG.2779	LOC107813647	PREDICTED: zinc finger A20 and AN1 domain-containing stress-associated protein 8-like [Nicotiana tabacum]	GO:0003677(DNA binding);GO:0005634(nucleus);GO:0008150(biological_process);GO:0008270(zinc ion binding);GO:0008270(zinc ion binding)	NA	280	271	0.776204	5.5	((((.((((((((((((((.&.)))))))))))))).))))	GGGCCAGUCGUUGUUGGCUC&UAGCCAAUGAUGACUUGCCU	1	96.2835	4	0.373103	Output/DS_TL/cleaveLand_result/t_plot/nta-miR169t_R-1_1ss8GT_XM_016638929.1_271_TPlot.pdf
XM_016644582.1:147	nta-miR6020a-5p	XM_016644582.1	#N/A	#N/A	#N/A	#N/A	#N/A	156	147	1	1	(((((((((((((((((((((&)))))))))))))))))))))	GAAGAUACUCGGAAAACAUUU&AAAUGUUUUUCGAGUAUCUUC	1	96.2835	4	0.373103	Output/DS_TL/cleaveLand_result/t_plot/nta-miR6020a-5p_XM_016644582.1_147_TPlot.pdf
XM_016652710.1:797	nta-MIR156c-p3_1ss22TC	XM_016652710.1	MSTRG.6683	LOC107825795	PREDICTED: DEAD-box ATP-dependent RNA helicase 38-like [Nicotiana tabacum]	GO:0004004(ATP-dependent RNA helicase activity);GO:0006413(translational initiation);GO:0010468(regulation of gene expression);GO:0010501(RNA secondary structure unwinding)	03013(RNA transport)	807	797	0.723596	7	((((((((((((-(((..((((((&))))))-.))).))))))))))))	GGUGACAGCAAG-GAAACUGGGCA&UGCUCA-CUUCUCUUGCUGUCACC	1	96.2835	4	0.373103	Output/DS_TL/cleaveLand_result/t_plot/nta-MIR156c-p3_1ss22TC_XM_016652710.1_797_TPlot.pdf
XM_016589322.1:387	nta-MIR827-p5	XM_016589322.1	107770058	LOC107770058	PREDICTED: dof zinc finger protein DOF2.4-like [Nicotiana tabacum]	GO:0003677(DNA binding);GO:0003700(transcription factor activity, sequence-specific DNA binding);GO:0005634(nucleus);GO:0006351(transcription, DNA-templated);GO:0006355(regulation of transcription, DNA-templated);GO:0046872(metal ion binding)	04712(Circadian rhythm - plant)	396	387	0.730159	3.5	.(((((((.((((((((((((&)))))))))))).))))))).	AGGUAGAUCACCAUCAACAAG&UUUGUUGAUGGUCAUCUAUUC	2	192.567	3	0.373439	Output/DS_TL/cleaveLand_result/t_plot/nta-MIR827-p5_XM_016589322.1_387_TPlot.pdf
MSTRG.3823.1:96	nta-miR6025a	MSTRG.3823.1	MSTRG.3823	.	0	NA	NA	105	96	0.713846	7	(((((((((..(((((((((..&..)))))))))..)))))))))	GAUGUUGUUGGAAUUGUUGGGC&UACCAACAAUUGAGAUAACAUC	2	192.567	3	0.376958	Output/DS_TL/cleaveLand_result/t_plot/nta-miR6025a_MSTRG.3823.1_96_TPlot.pdf
XM_016578563.1:995	nta-MIR6025c-p5	XM_016578563.1	MSTRG.9463	LOC107760508	PREDICTED: probable galacturonosyltransferase-like 3 isoform X2 [Nicotiana tabacum]	GO:0000271(polysaccharide biosynthetic process);GO:0005794(Golgi apparatus);GO:0016757(transferase activity, transferring glycosyl groups);GO:0016757(transferase activity, transferring glycosyl groups)	00500(Starch and sucrose metabolism);00520(Amino sugar and nucleotide sugar metabolism);00520(Amino sugar and nucleotide sugar metabolism)	1004	995	0.704478	6	(((((...((((.(((((((((((&)))))))))))-))))--.)))))	GCAAUGUAGGGAUUUACAUCCAGG&CCUGGAUGUAA-UCUC--AAUUGU	2	192.567	3	0.376958	Output/DS_TL/cleaveLand_result/t_plot/nta-MIR6025c-p5_XM_016578563.1_995_TPlot.pdf
XM_016598217.1:1421	nta-miR156g_L+1	XM_016598217.1	107778036	LOC107778036	squamosa promoter-binding-like protein 6 [Nicotiana tabacum]	GO:0003677(DNA binding);GO:0003700(transcription factor activity, sequence-specific DNA binding);GO:0005634(nucleus);GO:0006351(transcription, DNA-templated);GO:0006355(regulation of transcription, DNA-templated);GO:0010468(regulation of gene expression);GO:0042742(defense response to bacterium);GO:0046872(metal ion binding)	NA	1430	1421	0.909091	2.5	(((((((((.(((((((((((&))))))))))).)))))))))	GUGCUCUCUCUCUUCUGUCAG&UUGACAGAAGAUAGAGAGCAC	3	288.85	2	0.377118	Output/DS_TL/cleaveLand_result/t_plot/nta-miR156g_L+1_XM_016598217.1_1421_TPlot.pdf
XM_016608086.1:1409	nta-miR169a_1ss7AG	XM_016608086.1	107786581	LOC107786581	PREDICTED: uncharacterized protein LOC107786581 isoform X2 [Nicotiana tabacum]	GO:0016787(hydrolase activity);GO:0016787(hydrolase activity)	NA	1418	1409	0.701595	5.5	.((((((.(((((((((((((.&.)))))))))))))-)))))).	CUGGCAAUGUUAUUCCUGGCUA&CAGCCAGGGAUGAC-UUGCCGA	2	192.567	2	0.385037	Output/DS_TL/cleaveLand_result/t_plot/nta-miR169a_1ss7AG_XM_016608086.1_1409_TPlot.pdf
XM_016626373.1:977	nta-miR396b	XM_016626373.1	107802800	LOC107802800	PREDICTED: growth-regulating factor 4-like isoform X2 [Nicotiana tomentosiformis]	GO:0005524(ATP binding);GO:0005634(nucleus);GO:0006351(transcription, DNA-templated);GO:0006355(regulation of transcription, DNA-templated);GO:0048366(leaf development);GO:0048366(leaf development)	NA	987	977	0.868263	4	..(((((((((((.((((((((&))))))))-)))))))))))..	CCGUUCAAGAAAGCCUGUGGAA&UUCCACAG-CUUUCUUGAACUU	6	577.701	2	0.385037	Output/DS_TL/cleaveLand_result/t_plot/nta-miR396b_XM_016626373.1_977_TPlot.pdf
XM_016626999.1:668	nta-MIR6156-p5	XM_016626999.1	MSTRG.23142	LOC107803311	PREDICTED: ERBB-3 BINDING PROTEIN 1-like [Nicotiana tomentosiformis]	GO:0001558(regulation of cell growth);GO:0005634(nucleus);GO:0009734(auxin-activated signaling pathway);GO:0044843(cell cycle G1/S phase transition);GO:0051302(regulation of cell division)	NA	677	668	0.703264	7	((.((((((((((((((((..&..)))))))))))))))).))	GAUUGUUGAGGGUGUCUUAAG&AAUAGGACAUCUUCAACACUC	6	577.701	2	0.385037	Output/DS_TL/cleaveLand_result/t_plot/nta-MIR6156-p5_XM_016626999.1_668_TPlot.pdf
XM_016644708.1:1567	nta-miR6024	XM_016644708.1	MSTRG.4402	LOC107818669	PREDICTED: L-type lectin-domain containing receptor kinase VII.1-like [Nicotiana tomentosiformis]	GO:0004674(protein serine/threonine kinase activity);GO:0005524(ATP binding);GO:0005886(plasma membrane);GO:0006468(protein phosphorylation);GO:0016021(integral component of membrane);GO:0016301(kinase activity);GO:0030246(carbohydrate binding)	00500(Starch and sucrose metabolism)	1577	1567	0.761773	7	(((.((((((((((.(((((((((&)))))))))-))))))))))-)))	GGGCAAGGCAAUUCUUGGCUGAGA&UUUUAGCCA-GAGUUGUUUU-CCC	2	192.567	2	0.385037	Output/DS_TL/cleaveLand_result/t_plot/nta-miR6024_XM_016644708.1_1567_TPlot.pdf
XR_001648240.1:439	nta-MIR164a-p3	XR_001648240.1	MSTRG.17975	LOC107786867	PREDICTED: uncharacterized protein LOC109208355 [Nicotiana attenuata]	NA	00040(Pentose and glucuronate interconversions);00052(Galactose metabolism);00053(Ascorbate and aldarate metabolism);00520(Amino sugar and nucleotide sugar metabolism)	448	439	0.732697	5	((((((((((((((.(.((((&)))).).))))))))))))))	GAUGGGGAAGAUAGACUCAUG&CAUGUGCCUGUCUUCCCCAUC	3	288.85	2	0.385037	Output/DS_TL/cleaveLand_result/t_plot/nta-MIR164a-p3_XR_001648240.1_439_TPlot.pdf
MSTRG.17665.1:615	nta-MIR319b-p5	MSTRG.17665.1	MSTRG.17665	LOC107785877	PREDICTED: delta(24)-sterol reductase isoform X1 [Nicotiana tabacum]	GO:0008202(steroid metabolic process);GO:0008202(steroid metabolic process)	00100(Steroid biosynthesis);00100(Steroid biosynthesis)	624	615	0.772277	4.5	....(((((((((((((((((&)))))))))))))))))....	UACGGGAUUGAAGGAAGCUCU&AGAGCUUCCUUCAGUCCACUC	1	96.2835	4	0.38689	Output/DS_TL/cleaveLand_result/t_plot/nta-MIR319b-p5_MSTRG.17665.1_615_TPlot.pdf
XM_016614401.1:559	nta-MIR156g-p3	XM_016614401.1	MSTRG.19649	LOC107792209	PREDICTED: neurogenic protein mastermind-like [Nicotiana tabacum]	GO:0005737(cytoplasm);GO:0030001(metal ion transport);GO:0046914(transition metal ion binding);GO:0046916(cellular transition metal ion homeostasis)	NA	568	559	0.802703	7	(((((((((((((((((((...&...)))))))))))))))))))	GAGGUAUGGGGAGCACAAAAAG&UCAUUUGUGCUCUCUAUGCUUC	1	96.2835	4	0.38689	Output/DS_TL/cleaveLand_result/t_plot/nta-MIR156g-p3_XM_016614401.1_559_TPlot.pdf
XM_016637924.1:3054	nta-miR167a_L+1R-1	XM_016637924.1	MSTRG.26046	LOC107812758	PREDICTED: auxin response factor 8-like isoform X2 [Nicotiana tabacum]	GO:0003677(DNA binding);GO:0003700(transcription factor activity, sequence-specific DNA binding);GO:0005634(nucleus);GO:0006351(transcription, DNA-templated);GO:0006355(regulation of transcription, DNA-templated);GO:0009733(response to auxin);GO:0009734(auxin-activated signaling pathway);GO:0009908(flower development);GO:0009908(flower development)	04075(Plant hormone signal transduction);04075(Plant hormone signal transduction)	3063	3054	0.752427	7	.((((((.(((((((((((...&...))))))))))).)))))).	AAGAUCAGGCUGGCAGCUUGUA&UUGAAGCUGCCAGCAUGAUCUG	1	96.2835	4	0.38689	Output/DS_TL/cleaveLand_result/t_plot/nta-miR167a_L+1R-1_XM_016637924.1_3054_TPlot.pdf
XM_016645575.1:593	nta-miR6145a	XM_016645575.1	MSTRG.457	LOC107819472	PREDICTED: transcription factor DIVARICATA-like [Nicotiana sylvestris]	GO:0003677(DNA binding);GO:0003700(transcription factor activity, sequence-specific DNA binding);GO:0005634(nucleus);GO:0006351(transcription, DNA-templated);GO:0006355(regulation of transcription, DNA-templated);GO:0009739(response to gibberellin);GO:0009751(response to salicylic acid);GO:0044212(transcription regulatory region DNA binding)	NA	602	593	0.754875	6	(((((((((..((((((.((((&)))).))))))..)))))))))	GUCAGUGCUUGAUGUGAUGAUG&CAUUUUCACAUGUAGCACUGAC	1	96.2835	4	0.38689	Output/DS_TL/cleaveLand_result/t_plot/nta-miR6145a_XM_016645575.1_593_TPlot.pdf
MSTRG.17855.1:3619	nta-MIR156j-p3	MSTRG.17855.1	MSTRG.17855	LOC107786530	0	NA	NA	3628	3619	0.790026	5.5	((((((((((((((((((((.&.))))))))))))))))))))	GAUGAUGGGAGUGUGGAGAGG&GCUCUCUAUGCUUCUGUCAUC	1	96.2835	4	0.400373	Output/DS_TL/cleaveLand_result/t_plot/nta-MIR156j-p3_MSTRG.17855.1_3619_TPlot.pdf
XM_016588316.1:1848	nta-miR6146b	XM_016588316.1	107769134	LOC107769134	PREDICTED: pentatricopeptide repeat-containing protein At4g30700-like [Nicotiana tabacum]	GO:0000963(mitochondrial RNA processing);GO:0003674(molecular_function);GO:0005739(mitochondrion);GO:0008270(zinc ion binding);GO:0009507(chloroplast);GO:0016554(cytidine to uridine editing);GO:0080156(mitochondrial mRNA modification)	00500(Starch and sucrose metabolism)	1857	1848	0.730897	7	((((((.(((((.(((((((((..&..)))))))))-)))))-))))))	GAUAAGUUAUUUGCGUUGGACAUG&UUUGUCCAAUG-AAAUA-CUUAUC	1	96.2835	4	0.400373	Output/DS_TL/cleaveLand_result/t_plot/nta-miR6146b_XM_016588316.1_1848_TPlot.pdf
XM_016601170.1:240	nta-miR6149a	XM_016601170.1	107780613	LOC107780613	PREDICTED: F-box/kelch-repeat protein At3g06240-like [Nicotiana tabacum]	GO:0004842(ubiquitin-protein transferase activity);GO:0019005(SCF ubiquitin ligase complex);GO:0031146(SCF-dependent proteasomal ubiquitin-dependent protein catabolic process);GO:0031146(SCF-dependent proteasomal ubiquitin-dependent protein catabolic process)	00970(Aminoacyl-tRNA biosynthesis);00970(Aminoacyl-tRNA biosynthesis)	249	240	0.723077	4.5	(((.((((((.((((((((((&)))))))))).)))))).)))	GCCAGUUCAGAUGCGUGUCAA&UUGAUACGCACCUGAAUCGGC	1	96.2835	4	0.400373	Output/DS_TL/cleaveLand_result/t_plot/nta-miR6149a_XM_016601170.1_240_TPlot.pdf
XM_016602801.1:2550	nta-miR156g_L+1	XM_016602801.1	#N/A	#N/A	#N/A	#N/A	#N/A	2559	2550	0.922865	2	(((((((((.(((((((((((&))))))))))).)))))))))	GUGCUCUCUCUCUUCUGUCAA&UUGACAGAAGAUAGAGAGCAC	1	96.2835	4	0.400373	Output/DS_TL/cleaveLand_result/t_plot/nta-miR156g_L+1_XM_016602801.1_2550_TPlot.pdf
XM_016627143.1:1872	nta-miR172a_R-1	XM_016627143.1	107803429	LOC107803429	PREDICTED: floral homeotic protein APETALA 2-like isoform X1 [Nicotiana tabacum]	GO:0003677(DNA binding);GO:0003700(transcription factor activity, sequence-specific DNA binding);GO:0005634(nucleus);GO:0006351(transcription, DNA-templated);GO:0006355(regulation of transcription, DNA-templated);GO:0009908(flower development);GO:0010073(meristem maintenance);GO:0010093(specification of floral organ identity);GO:0019953(sexual reproduction);GO:0030154(cell differentiation);GO:004…	04075(Plant hormone signal transduction);04075(Plant hormone signal transduction)	1881	1872	0.993976	2	(((((((((((((((((((.&.)))))))))))))))))))	UGCAGCAUCAUCAGGAUUCC&AGAAUCUUGAUGAUGCUGCA	1	96.2835	4	0.400373	Output/DS_TL/cleaveLand_result/t_plot/nta-miR172a_R-1_XM_016627143.1_1872_TPlot.pdf
XM_016577350.1:871	nta-MIR398-p5	XM_016577350.1	MSTRG.9108	LOC107759409	3-oxo-Delta(4,5)-steroid 5-beta-reductase-like [Nicotiana tabacum]	GO:0005829(cytosol);GO:0008202(steroid metabolic process);GO:0009611(response to wounding);GO:0010051(xylem and phloem pattern formation);GO:0035671(enone reductase activity);GO:0047787(delta4-3-oxosteroid 5beta-reductase activity);GO:0055114(oxidation-reduction process)	00040(Pentose and glucuronate interconversions);00500(Starch and sucrose metabolism)	880	871	0.691729	5	.(((-(((.(((((((((((((&)))))))))))))-))).))).	GAUG-GAUACUCGGAUUGCUCC&GGGGCAAUCUGAG-AUCACAUG	5	481.417	2	0.400574	Output/DS_TL/cleaveLand_result/t_plot/nta-MIR398-p5_XM_016577350.1_871_TPlot.pdf
XM_016588119.1:3625	nta-miR6149a	XM_016588119.1	MSTRG.12108	LOC107768943	PREDICTED: uncharacterized protein LOC104113886 isoform X1 [Nicotiana tomentosiformis]	NA	NA	3634	3625	0.689744	5.5	((((((((.(((((((((.((.&.)).)))))))))-))))))))	GCUGAUUCUAGGUGUGUACCAC&UUGAUACGCACCU-GAAUCGGC	2	192.567	2	0.400574	Output/DS_TL/cleaveLand_result/t_plot/nta-miR6149a_XM_016588119.1_3625_TPlot.pdf
XM_016589120.1:2363	nta-miR6148b_R+2	XM_016589120.1	107769867	LOC107769867	PREDICTED: transcription factor LHW-like isoform X1 [Nicotiana tabacum]	GO:0004674(protein serine/threonine kinase activity);GO:0005829(cytosol);GO:0006355(regulation of transcription, DNA-templated);GO:0006468(protein phosphorylation);GO:0035556(intracellular signal transduction);GO:0035556(intracellular signal transduction)	NA	2373	2363	0.655977	4.5	((((-(((((.((((((.((((((&))))))-)))))).))))).))))	GUUG-GAACGCACGAUUAAACACA&UGUGUU-AAUCGUUUGUUCUCAAC	2	192.567	2	0.400574	Output/DS_TL/cleaveLand_result/t_plot/nta-miR6148b_R+2_XM_016589120.1_2363_TPlot.pdf
XM_016615504.1:1066	nta-MIR164a-p3	XM_016615504.1	MSTRG.19988	LOC107793207	PREDICTED: uncharacterized protein LOC104114860 [Nicotiana tomentosiformis]	GO:0005737(cytoplasm);GO:0008483(transaminase activity);GO:0009058(biosynthetic process);GO:0009507(chloroplast);GO:0030170(pyridoxal phosphate binding)	00380(Tryptophan metabolism);00450(Selenocompound metabolism)	1075	1066	0.675418	7	.(((((((...((((((((.(((.&.))).))))))))---))))))).	CAUGGGGAGUAAGACAGGCUCAUU&CAUGUGCCUGUCU---UCCCCAUC	2	192.567	3	0.40441	Output/DS_TL/cleaveLand_result/t_plot/nta-MIR164a-p3_XM_016615504.1_1066_TPlot.pdf
XM_016588080.1:1075	nta-miR156g_L+1	XM_016588080.1	MSTRG.12091	LOC107768912	teosinte glume architecture 1-like [Nicotiana tabacum]	GO:0003677(DNA binding);GO:0003700(transcription factor activity, sequence-specific DNA binding);GO:0005634(nucleus);GO:0006351(transcription, DNA-templated);GO:0006355(regulation of transcription, DNA-templated);GO:0046872(metal ion binding);GO:0048653(anther development);GO:0048653(anther development)	NA	1084	1075	0.906336	3	(((((((((.((((((((((.&.)))))))))).)))))))))	GUGCUCUCUCUCUUCUGUCAU&UUGACAGAAGAUAGAGAGCAC	2	192.567	2	0.408194	Output/DS_TL/cleaveLand_result/t_plot/nta-miR156g_L+1_XM_016588080.1_1075_TPlot.pdf
XM_016589121.1:2363	nta-miR6148b_R+2	XM_016589121.1	107769867	LOC107769867	PREDICTED: transcription factor LHW-like isoform X1 [Nicotiana tabacum]	GO:0004674(protein serine/threonine kinase activity);GO:0005829(cytosol);GO:0006355(regulation of transcription, DNA-templated);GO:0006468(protein phosphorylation);GO:0035556(intracellular signal transduction);GO:0035556(intracellular signal transduction)	NA	2373	2363	0.655977	4.5	((((-(((((.((((((.((((((&))))))-)))))).))))).))))	GUUG-GAACGCACGAUUAAACACA&UGUGUU-AAUCGUUUGUUCUCAAC	2	192.567	2	0.408194	Output/DS_TL/cleaveLand_result/t_plot/nta-miR6148b_R+2_XM_016589121.1_2363_TPlot.pdf
XM_016629135.1:1727	nta-miR319a_R-1	XM_016629135.1	107805141	LOC107805141	PREDICTED: transcription factor GAMYB-like isoform X1 [Nicotiana tabacum]	GO:0003677(DNA binding);GO:0003700(transcription factor activity, sequence-specific DNA binding);GO:0005634(nucleus);GO:0006355(regulation of transcription, DNA-templated);GO:0009723(response to ethylene);GO:0009740(gibberellic acid mediated signaling pathway);GO:0009751(response to salicylic acid);GO:0043068(positive regulation of programmed cell death);GO:0045893(positive regulation of transcri…	04626(Plant-pathogen interaction);04626(Plant-pathogen interaction)	1736	1727	0.735577	4	..((((((((((((.(((((&))))).))))))))))))..	UCGAGCUCCCUUCACUCCAA&UUGGACUGAAGGGAGCUCCC	3	288.85	3	0.411082	Output/DS_TL/cleaveLand_result/t_plot/nta-miR319a_R-1_XM_016629135.1_1727_TPlot.pdf
XM_016607142.1:89	nta-miR399a	XM_016607142.1	MSTRG.17634	LOC107785769	PREDICTED: protein arginine N-methyltransferase PRMT10 [Nicotiana tomentosiformis]	GO:0005829(cytosol);GO:0006355(regulation of transcription, DNA-templated);GO:0008469(histone-arginine N-methyltransferase activity);GO:0035242(protein-arginine omega-N asymmetric methyltransferase activity)	NA	99	89	0.725055	6.5	((.(((((((((((((..(((((&)))))-.)))))))))))))-))	CAUGGGUAGCUCUUCUAAUGGCG&CGCCA-AAGGAGAGCUGCCC-UG	1	96.2835	4	0.413559	Output/DS_TL/cleaveLand_result/t_plot/nta-miR399a_XM_016607142.1_89_TPlot.pdf
XM_016615237.1:806	nta-MIR162b-p5	XM_016615237.1	107792972	LOC107792972	PREDICTED: clathrin light chain 1-like isoform X1 [Nicotiana tabacum]	GO:0005198(structural molecule activity);GO:0030125(clathrin vesicle coat);GO:0032050(clathrin heavy chain binding);GO:0072583(clathrin-mediated endocytosis);GO:0072583(clathrin-mediated endocytosis)	04144(Endocytosis);04144(Endocytosis)	815	806	0.713647	7	...((((((((((((((((((.&.))))))))))))))))))...	UACUGAUGGACCGUUGCUUCCC&UGGAGGCAGCGGUUCAUCGAUC	1	96.2835	4	0.413559	Output/DS_TL/cleaveLand_result/t_plot/nta-MIR162b-p5_XM_016615237.1_806_TPlot.pdf
XM_016628100.1:2026	nta-miR172a_R-1	XM_016628100.1	107804251	LOC107804251	PREDICTED: floral homeotic protein APETALA 2-like [Nicotiana tabacum]	GO:0003677(DNA binding);GO:0003700(transcription factor activity, sequence-specific DNA binding);GO:0005634(nucleus);GO:0006351(transcription, DNA-templated);GO:0006355(regulation of transcription, DNA-templated);GO:0009908(flower development);GO:0010073(meristem maintenance);GO:0010093(specification of floral organ identity);GO:0019953(sexual reproduction);GO:0030154(cell differentiation);GO:004…	04075(Plant hormone signal transduction)	2035	2026	0.993976	2	(((((((((((((((((((.&.)))))))))))))))))))	UGCAGCAUCAUCAGGAUUCC&AGAAUCUUGAUGAUGCUGCA	1	96.2835	4	0.413559	Output/DS_TL/cleaveLand_result/t_plot/nta-miR172a_R-1_XM_016628100.1_2026_TPlot.pdf
XM_016630155.1:1464	nta-miR6024	XM_016630155.1	MSTRG.23989	LOC107806042	PREDICTED: L-type lectin-domain containing receptor kinase VII.1-like [Nicotiana tabacum]	GO:0004674(protein serine/threonine kinase activity);GO:0005524(ATP binding);GO:0005886(plasma membrane);GO:0006468(protein phosphorylation);GO:0016021(integral component of membrane);GO:0016301(kinase activity);GO:0030246(carbohydrate binding)	00500(Starch and sucrose metabolism)	1474	1464	0.775623	6.5	(((.((((((((((.(((((((((&)))))))))-))))))))))-)))	GGGCAAGACAAUUCUUGGCUGAGA&UUUUAGCCA-GAGUUGUUUU-CCC	1	96.2835	4	0.413559	Output/DS_TL/cleaveLand_result/t_plot/nta-miR6024_XM_016630155.1_1464_TPlot.pdf
XM_016635553.1:1309	nta-MIR6158b-p5	XM_016635553.1	MSTRG.25446	LOC107810741	PREDICTED: transcription factor VOZ1-like [Nicotiana sylvestris]	GO:0005515(protein binding);GO:0005634(nucleus);GO:0005737(cytoplasm);GO:0006351(transcription, DNA-templated);GO:0009585(red, far-red light phototransduction);GO:0043565(sequence-specific DNA binding);GO:0045893(positive regulation of transcription, DNA-templated);GO:0046872(metal ion binding);GO:0048574(long-day photoperiodism, flowering);GO:0048578(positive regulation of long-day photoperiodis…	NA	1318	1309	0.671123	6.5	.(((((((--((((((((((((&))))))))))))..))))))).	UGUGCCCU--GUACAGAUUGGA&UUCGAUUUGUACGAAGGGCAUG	1	96.2835	4	0.413559	Output/DS_TL/cleaveLand_result/t_plot/nta-MIR6158b-p5_XM_016635553.1_1309_TPlot.pdf
XM_016637954.1:550	nta-MIR169m-p3_1ss18AG	XM_016637954.1	MSTRG.26058	LOC107812784	PREDICTED: probable nucleoredoxin 2 [Nicotiana tabacum]	GO:0005829(cytosol);GO:0009860(pollen tube growth);GO:0010183(pollen tube guidance);GO:0045454(cell redox homeostasis);GO:0046686(response to cadmium ion);GO:0047134(protein-disulfide reductase activity);GO:0055114(oxidation-reduction process);GO:0080092(regulation of pollen tube growth)	NA	560	550	0.705336	5.5	.(((((((.(((((.((((((((&))))))))-)))))-))))))).	GCCUUGGCUUGCAAUUCCAUUCU&AGAGUGGA-UUGCA-GCCAGGGA	1	96.2835	4	0.413559	Output/DS_TL/cleaveLand_result/t_plot/nta-MIR169m-p3_1ss18AG_XM_016637954.1_550_TPlot.pdf
XM_016654510.1:10524	nta-MIR6144-p3	XM_016654510.1	MSTRG.7221	LOC107827382	PREDICTED: titin-like isoform X8 [Nicotiana tabacum]	NA	NA	10533	10524	0.835913	5.5	((((((((((..(((((((((&)))))))))..))))))))))	GGUGGAAACUGAUUCAACAGG&CUUGUUGAAGAAGUUUCCAUC	1	96.2835	4	0.413559	Output/DS_TL/cleaveLand_result/t_plot/nta-MIR6144-p3_XM_016654510.1_10524_TPlot.pdf
XM_016582474.1:537	nta-miR159	XM_016582474.1	MSTRG.10590	LOC107763963	PREDICTED: uncharacterized protein LOC107763963 [Nicotiana tabacum]	GO:0005634(nucleus);GO:0005794(Golgi apparatus);GO:0005886(plasma membrane);GO:0009416(response to light stimulus);GO:0009718(anthocyanin-containing compound biosynthetic process);GO:0015995(chlorophyll biosynthetic process);GO:0045893(positive regulation of transcription, DNA-templated)	NA	546	537	0.742466	4.5	.((((((((.((((((((((.&.)))))))))).)))))))).	GAGAGUUCCAUUCAAUCCAAU&UUUGGAUUGAAGGGAGCUCUA	2	192.567	3	0.41439	Output/DS_TL/cleaveLand_result/t_plot/nta-miR159_XM_016582474.1_537_TPlot.pdf
XM_016650807.1:513	nta-MIR6145e-p3	XM_016650807.1	MSTRG.6131	LOC107824084	PREDICTED: glycine-rich protein A3-like isoform X1 [Nicotiana tomentosiformis]	NA	NA	523	513	0.679894	5	((((.-(((((((((.(((((&)))))-)))))))))..))))	GGAUC-UCACAUGGGACACGG&CCGUG-CUCAUGUGACAAUCC	5	481.417	3	0.41439	Output/DS_TL/cleaveLand_result/t_plot/nta-MIR6145e-p3_XM_016650807.1_513_TPlot.pdf
XM_016588082.1:1925	nta-miR156g_L+1	XM_016588082.1	MSTRG.12091	LOC107768912	teosinte glume architecture 1-like [Nicotiana tabacum]	GO:0003677(DNA binding);GO:0003700(transcription factor activity, sequence-specific DNA binding);GO:0005634(nucleus);GO:0006351(transcription, DNA-templated);GO:0006355(regulation of transcription, DNA-templated);GO:0046872(metal ion binding);GO:0048653(anther development);GO:0048653(anther development)	NA	1934	1925	0.906336	3	(((((((((.((((((((((.&.)))))))))).)))))))))	GUGCUCUCUCUCUUCUGUCAU&UUGACAGAAGAUAGAGAGCAC	2	192.567	2	0.415718	Output/DS_TL/cleaveLand_result/t_plot/nta-miR156g_L+1_XM_016588082.1_1925_TPlot.pdf
XM_016627269.1:417	nta-miR167d	XM_016627269.1	107803527	LOC107803527	PREDICTED: probable magnesium transporter NIPA9 isoform X1 [Nicotiana sylvestris]	GO:0008150(biological_process);GO:0009507(chloroplast);GO:0015095(magnesium ion transmembrane transporter activity);GO:0016021(integral component of membrane)	NA	426	417	0.766067	4.5	..((((.((((((((((((((&)))))))))))))).))))..	GUGAUUCUGCUGGUAGCUUCA&UGAAGCUGCCAGCAUGAUCUA	2	192.567	2	0.415718	Output/DS_TL/cleaveLand_result/t_plot/nta-miR167d_XM_016627269.1_417_TPlot.pdf
XM_016635332.1:82	nta-miR159	XM_016635332.1	MSTRG.2543	LOC107810525	PREDICTED: U-box domain-containing protein 62-like isoform X1 [Nicotiana tabacum]	GO:0004842(ubiquitin-protein transferase activity);GO:0005634(nucleus);GO:0016567(protein ubiquitination);GO:0016874(ligase activity);GO:0016874(ligase activity)	NA	91	82	0.772603	3.5	(((((((((.((((((((((((&))))))))))))-)))))))))	UGGAGUUUCUCUUCAAUCCAAA&UUUGGAUUGAAG-GGAGCUCUA	2	192.567	2	0.415718	Output/DS_TL/cleaveLand_result/t_plot/nta-miR159_XM_016635332.1_82_TPlot.pdf
XM_016660508.1:914	nta-MIR6145e-p3	XM_016660508.1	MSTRG.8870	LOC107832648	PREDICTED: G-box-binding factor-like [Nicotiana tomentosiformis]	GO:0003674(molecular_function);GO:0009507(chloroplast);GO:0009737(response to abscisic acid);GO:0016021(integral component of membrane)	00510(N-Glycan biosynthesis)	923	914	0.71164	6	(((..((((((((((((.(.&.).))))))))))))..)))	GGAACGUCACGUGAGCAGGA&CCGUGCUCAUGUGACAAUCC	3	288.85	2	0.415718	Output/DS_TL/cleaveLand_result/t_plot/nta-MIR6145e-p3_XM_016660508.1_914_TPlot.pdf
XM_016626154.1:537	nta-miR159	XM_016626154.1	MSTRG.22913	LOC107802626	PREDICTED: uncharacterized protein LOC107802626 [Nicotiana tabacum]	GO:0005634(nucleus);GO:0005794(Golgi apparatus);GO:0005886(plasma membrane);GO:0009416(response to light stimulus);GO:0009718(anthocyanin-containing compound biosynthetic process);GO:0015995(chlorophyll biosynthetic process);GO:0045893(positive regulation of transcription, DNA-templated)	NA	546	537	0.742466	4.5	.((((((((.((((((((((.&.)))))))))).)))))))).	GAGAGUUCCAUUCAAUCCAAU&UUUGGAUUGAAGGGAGCUCUA	2	192.567	3	0.417679	Output/DS_TL/cleaveLand_result/t_plot/nta-miR159_XM_016626154.1_537_TPlot.pdf
XM_016584537.1:624	nta-miR482a	XM_016584537.1	MSTRG.11222	LOC107765837	PREDICTED: photosystem I reaction center subunit III, chloroplastic-like [Nicotiana sylvestris]	GO:0003674(molecular_function);GO:0009507(chloroplast);GO:0009534(chloroplast thylakoid);GO:0009535(chloroplast thylakoid membrane);GO:0009538(photosystem I reaction center);GO:0009579(thylakoid);GO:0009941(chloroplast envelope);GO:0010287(plastoglobule);GO:0015979(photosynthesis);GO:0016020(membrane);GO:0016021(integral component of membrane)	00195(Photosynthesis)	632	624	0.731903	6.5	..(((.(((((((-((((((((&)))))))).))))))).)))..	UUGGAUUGGGUGG-GUUGGAAG&UUUCCAAUUCCACCCAUUCCUA	7	673.984	3	0.42095	Output/DS_TL/cleaveLand_result/t_plot/nta-miR482a_XM_016584537.1_624_TPlot.pdf
MSTRG.15708.1:3561	nta-MIR172a-p5	MSTRG.15708.1	MSTRG.15708	LOC107779756	PREDICTED: probable transmembrane GTPase FZO-like, chloroplastic [Nicotiana tabacum]	GO:0004789(thiamine-phosphate diphosphorylase activity);GO:0005525(GTP binding);GO:0009228(thiamine biosynthetic process);GO:0009507(chloroplast);GO:0009535(chloroplast thylakoid membrane);GO:0009706(chloroplast inner membrane);GO:0010027(thylakoid membrane organization);GO:0010228(vegetative to reproductive phase transition of meristem);GO:0016021(integral component of membrane);GO:0016787(hydro…	NA	3572	3561	0.759104	5	(((((-(((((((((((..((((&))))--))))))))))).)))))	GUGAA-CUUGAAGAUGCUAUGCA&UGCA--GCAUCUUCAAGAUUCAC	2	192.567	2	0.423146	Output/DS_TL/cleaveLand_result/t_plot/nta-MIR172a-p5_MSTRG.15708.1_3561_TPlot.pdf
XM_016628168.1:1342	nta-MIR169t-p3	XM_016628168.1	MSTRG.23424	LOC107804300	PREDICTED: protein transport protein Sec61 subunit alpha [Nicotiana tomentosiformis]	GO:0005794(Golgi apparatus);GO:0009306(protein secretion);GO:0015031(protein transport);GO:0015450(P-P-bond-hydrolysis-driven protein transmembrane transporter activity);GO:0016020(membrane);GO:0016021(integral component of membrane)	03060(Protein export);04141(Protein processing in endoplasmic reticulum);04145(Phagosome)	1350	1342	0.724747	5.5	...(((((((((((-((((((&)))))).)))))))))))...	AUCCGCCAGAGAUG-UUGCCA&UGGCAAGCAUCUUUGGCGACU	5	481.417	2	0.423146	Output/DS_TL/cleaveLand_result/t_plot/nta-MIR169t-p3_XM_016628168.1_1342_TPlot.pdf
XM_016630948.1:1632	nta-miR394	XM_016630948.1	MSTRG.24205	LOC107806724	PREDICTED: apoptosis inhibitor 5-like [Nicotiana tabacum]	GO:0005634(nucleus);GO:0005829(cytosol);GO:0009506(plasmodesma)	NA	1641	1632	0.742347	6	((((((((-(((.(((((((&))))))).))).))))))))	GGAGGUGG-UAGCAUGCCGA&UUGGCAUUCUGUCCACCUCC	3	288.85	2	0.423146	Output/DS_TL/cleaveLand_result/t_plot/nta-miR394_XM_016630948.1_1632_TPlot.pdf
XM_016637178.1:2094	nta-miR6154a	XM_016637178.1	MSTRG.25863	LOC107812145	PREDICTED: subtilisin-like protease SBT1.4 [Nicotiana tomentosiformis]	GO:0004252(serine-type endopeptidase activity);GO:0005618(cell wall)	04144(Endocytosis)	2103	2094	0.679157	6	((((.--(((((((((((((.&.)))))))))))))...))))	GGCUA--CUCCAGGAGACCUG&UGGGUCUCCUGGAGAAAGGUC	3	288.85	3	0.424202	Output/DS_TL/cleaveLand_result/t_plot/nta-miR6154a_XM_016637178.1_2094_TPlot.pdf
XM_016602800.1:2553	nta-miR156g_L+1	XM_016602800.1	#N/A	#N/A	#N/A	#N/A	#N/A	2562	2553	0.922865	2	(((((((((.(((((((((((&))))))))))).)))))))))	GUGCUCUCUCUCUUCUGUCAA&UUGACAGAAGAUAGAGAGCAC	1	96.2835	4	0.426456	Output/DS_TL/cleaveLand_result/t_plot/nta-miR156g_L+1_XM_016602800.1_2553_TPlot.pdf
XM_016630214.1:2041	nta-miR390a	XM_016630214.1	MSTRG.24007	LOC107806103	PREDICTED: uncharacterized protein LOC107806103 [Nicotiana tabacum]	GO:0004674(protein serine/threonine kinase activity);GO:0005634(nucleus);GO:0046777(protein autophosphorylation);GO:0046777(protein autophosphorylation)	NA	2050	2041	0.740654	6	((((((.((((((..((((((&))))))..)))))).))))))	GGUGCUCUCCCUCGAGGGCUU&AAGCUCAGGAGGGAUAGCACC	1	96.2835	4	0.426456	Output/DS_TL/cleaveLand_result/t_plot/nta-miR390a_XM_016630214.1_2041_TPlot.pdf
XM_016638871.1:1813	nta-MIR396a-p3	XM_016638871.1	MSTRG.2762	LOC107813592	PREDICTED: uncharacterized protein LOC107813592 [Nicotiana tabacum]	GO:0004806(triglyceride lipase activity);GO:0006629(lipid metabolic process);GO:0009507(chloroplast);GO:0016787(hydrolase activity)	NA	1822	1813	0.732782	7	(((.(((((((((..(((((.&.)))))..))))))))).)))	UCUGCCCACAGCCCAGUUGAU&UUCAAUAAGGCUGUGGGAAGA	1	96.2835	4	0.426456	Output/DS_TL/cleaveLand_result/t_plot/nta-MIR396a-p3_XM_016638871.1_1813_TPlot.pdf
XM_016636442.1:698	nta-MIR6145f-p3	XM_016636442.1	MSTRG.25685	LOC107811498	PREDICTED: protein phosphatase 2C 29 [Nicotiana tabacum]	GO:0004722(protein serine/threonine phosphatase activity);GO:0005543(phospholipid binding);GO:0005634(nucleus);GO:0005886(plasma membrane);GO:0006355(regulation of transcription, DNA-templated);GO:0006470(protein dephosphorylation);GO:0007275(multicellular organism development);GO:0009826(unidimensional cell growth);GO:0009933(meristem structural organization);GO:0010074(maintenance of meristem i…	NA	708	698	0.662198	7	...((((-(((((.((((((((&))))))))-))))).))))...	CCGAUCG-AGCGUGGAGCACUG&CAGUGCUC-AUGCUACGAUAUC	2	192.567	3	0.427436	Output/DS_TL/cleaveLand_result/t_plot/nta-MIR6145f-p3_XM_016636442.1_698_TPlot.pdf
XM_016596969.1:1667	nta-miR319a_R-1	XM_016596969.1	107777006	LOC107777006	PREDICTED: transcription factor TCP2-like [Nicotiana sylvestris]	GO:0003677(DNA binding);GO:0003700(transcription factor activity, sequence-specific DNA binding);GO:0005515(protein binding);GO:0005634(nucleus);GO:0006351(transcription, DNA-templated);GO:0006355(regulation of transcription, DNA-templated);GO:0008285(negative regulation of cell proliferation);GO:0009965(leaf morphogenesis);GO:0030154(cell differentiation);GO:0045962(positive regulation of develo…	NA	1676	1667	0.769231	2.5	(((((.-(((((((((((((&)))))))))))))..)))))	GGGGGA-CCCUUCAGUCCAA&UUGGACUGAAGGGAGCUCCC	3	288.85	2	0.430479	Output/DS_TL/cleaveLand_result/t_plot/nta-miR319a_R-1_XM_016596969.1_1667_TPlot.pdf
XM_016634086.1:839	nta-miR399a	XM_016634086.1	MSTRG.2517	LOC107809449	PREDICTED: uncharacterized protein LOC107809449 [Nicotiana tabacum]	GO:0009570(chloroplast stroma);GO:0044183(protein binding involved in protein folding);GO:0061077(chaperone-mediated protein folding)	NA	847	839	0.662971	6	.(((.((((((((-((((((((&)))))))).))))))))-))).	UGGGAGUAGCUCU-CUUUGGUG&CGCCAAAGGAGAGCUGC-CCUG	2	192.567	3	0.430652	Output/DS_TL/cleaveLand_result/t_plot/nta-miR399a_XM_016634086.1_839_TPlot.pdf
XM_016611438.1:1694	nta-miR6149a	XM_016611438.1	MSTRG.18837	LOC107789600	PREDICTED: pre-mRNA-processing factor 39 [Nicotiana tabacum]	GO:0000243(commitment complex);GO:0000395(mRNA 5'-splice site recognition);GO:0005685(U1 snRNP);GO:0030627(pre-mRNA 5'-splice site binding);GO:0071004(U2-type prespliceosome)	NA	1703	1694	0.653846	6	.(((((..(((((.((((((((((&))))))))))-)))))--))))).	CCUGGUGCUCAGGCUGCGUAUCAA&UUGAUACGCA-CCUGA--AUCGGC	2	192.567	3	0.43385	Output/DS_TL/cleaveLand_result/t_plot/nta-miR6149a_XM_016611438.1_1694_TPlot.pdf
XM_016590003.1:610	nta-miR482a	XM_016590003.1	MSTRG.12630	LOC107770672	PREDICTED: photosystem I reaction center subunit III, chloroplastic-like [Nicotiana tabacum]	GO:0003674(molecular_function);GO:0009507(chloroplast);GO:0009534(chloroplast thylakoid);GO:0009535(chloroplast thylakoid membrane);GO:0009538(photosystem I reaction center);GO:0009579(thylakoid);GO:0009941(chloroplast envelope);GO:0010287(plastoglobule);GO:0015979(photosynthesis);GO:0016020(membrane);GO:0016021(integral component of membrane)	00195(Photosynthesis)	618	610	0.731903	6.5	..(((.(((((((-((((((((&)))))))).))))))).)))..	UUGGAUUGGGUGG-GUUGGAAG&UUUCCAAUUCCACCCAUUCCUA	4	385.134	3	0.43703	Output/DS_TL/cleaveLand_result/t_plot/nta-miR482a_XM_016590003.1_610_TPlot.pdf
XM_016635327.1:82	nta-miR159	XM_016635327.1	MSTRG.2543	LOC107810525	PREDICTED: U-box domain-containing protein 62-like isoform X1 [Nicotiana tabacum]	GO:0004842(ubiquitin-protein transferase activity);GO:0005634(nucleus);GO:0016567(protein ubiquitination);GO:0016874(ligase activity);GO:0016874(ligase activity)	NA	91	82	0.772603	3.5	(((((((((.((((((((((((&))))))))))))-)))))))))	UGGAGUUUCUCUUCAAUCCAAA&UUUGGAUUGAAG-GGAGCUCUA	2	192.567	2	0.43772	Output/DS_TL/cleaveLand_result/t_plot/nta-miR159_XM_016635327.1_82_TPlot.pdf
XM_016602803.1:1826	nta-miR156g_L+1	XM_016602803.1	107781982	LOC107781982	PREDICTED: squamosa promoter-binding-like protein 2 [Nicotiana sylvestris]	GO:0003677(DNA binding);GO:0003700(transcription factor activity, sequence-specific DNA binding);GO:0005634(nucleus);GO:0006351(transcription, DNA-templated);GO:0006355(regulation of transcription, DNA-templated);GO:0044212(transcription regulatory region DNA binding);GO:0046872(metal ion binding);GO:0048510(regulation of timing of transition from vegetative to reproductive phase);GO:0048653(anth…	NA	1835	1826	0.922865	2	(((((((((.(((((((((((&))))))))))).)))))))))	GUGCUCUCUCUCUUCUGUCAA&UUGACAGAAGAUAGAGAGCAC	1	96.2835	4	0.439069	Output/DS_TL/cleaveLand_result/t_plot/nta-miR156g_L+1_XM_016602803.1_1826_TPlot.pdf
XM_016642552.1:739	nta-MIR167c-p3	XM_016642552.1	MSTRG.3803	LOC107816805	PREDICTED: glycine-rich cell wall structural protein 1.8-like [Nicotiana tabacum]	NA	NA	747	739	0.794521	6.5	..(((((((((-((((((((.&.)))))))).)))))))))..	UAUGGAGCUGC-AGGUGACCA&AGGUCAUCUAGCAGCUUCAAU	1	96.2835	4	0.439069	Output/DS_TL/cleaveLand_result/t_plot/nta-MIR167c-p3_XM_016642552.1_739_TPlot.pdf
XM_016646731.1:1389	nta-MIR169s-p5	XM_016646731.1	MSTRG.4965	LOC107820445	PREDICTED: dnaJ homolog 1, mitochondrial-like [Nicotiana sylvestris]	GO:0005524(ATP binding);GO:0005739(mitochondrion);GO:0006457(protein folding);GO:0009408(response to heat);GO:0009507(chloroplast);GO:0009535(chloroplast thylakoid membrane);GO:0009941(chloroplast envelope);GO:0031072(heat shock protein binding);GO:0046872(metal ion binding);GO:0051082(unfolded protein binding);GO:0051082(unfolded protein binding)	04141(Protein processing in endoplasmic reticulum);04141(Protein processing in endoplasmic reticulum)	1399	1389	0.728736	7	((((((((((((.(((.(((((&))))).)))-))))))))))))	GCCAGGGACGACAUUGGUGAUG&UAUCGGCAG-GUCGUCCUUGGC	1	96.2835	4	0.439069	Output/DS_TL/cleaveLand_result/t_plot/nta-MIR169s-p5_XM_016646731.1_1389_TPlot.pdf
XM_016649162.1:1193	nta-miR397_R+1	XM_016649162.1	#N/A	#N/A	#N/A	#N/A	#N/A	1202	1193	0.808625	3	(.((.((((((((((((((((.&.))))))))))))))))-)).)	GUCAUUCAACGCUGCACUCAAG&AUUGAGUGCAGCGUUGA-UGUC	1	96.2835	4	0.439069	Output/DS_TL/cleaveLand_result/t_plot/nta-miR397_R+1_XM_016649162.1_1193_TPlot.pdf
XM_016646745.1:1374	nta-MIR172i-p5	XM_016646745.1	MSTRG.4972	LOC107820459	PREDICTED: serine carboxypeptidase-like 42 [Nicotiana tabacum]	GO:0004185(serine-type carboxypeptidase activity);GO:0051603(proteolysis involved in cellular protein catabolic process)	00460(Cyanoamino acid metabolism)	1384	1374	0.749263	5.5	.((((.((((((((.(((((((&)))))))-)))))))).)))).	CGUGAUUCUUGAUGUGUGCUAU&GUAGCAU-CAUCAAGAUUCACA	2	192.567	3	0.440192	Output/DS_TL/cleaveLand_result/t_plot/nta-MIR172i-p5_XM_016646745.1_1374_TPlot.pdf
XM_016622896.1:1649	nta-miR319a_R-1	XM_016622896.1	MSTRG.21993	LOC107799751	PREDICTED: transcription factor TCP2-like [Nicotiana tabacum]	GO:0003677(DNA binding);GO:0003700(transcription factor activity, sequence-specific DNA binding);GO:0005515(protein binding);GO:0005634(nucleus);GO:0006351(transcription, DNA-templated);GO:0006355(regulation of transcription, DNA-templated);GO:0008285(negative regulation of cell proliferation);GO:0009965(leaf morphogenesis);GO:0030154(cell differentiation);GO:0045962(positive regulation of develo…	NA	1658	1649	0.769231	2.5	(((((.-(((((((((((((&)))))))))))))..)))))	GGGGGA-CCCUUCAGUCCAA&UUGGACUGAAGGGAGCUCCC	3	288.85	2	0.444868	Output/DS_TL/cleaveLand_result/t_plot/nta-miR319a_R-1_XM_016622896.1_1649_TPlot.pdf
XM_016600283.1:2083	nta-MIR166g-p5_1ss19TA	XM_016600283.1	MSTRG.15719	LOC107779798	PREDICTED: 187-kDa microtubule-associated protein AIR9-like [Nicotiana tabacum]	GO:0005576(extracellular region);GO:0005773(vacuole);GO:0008150(biological_process)	NA	2092	2083	0.682584	7	(((((((((((((((.((((.&.)))).)))))))))))))))	UCUCGAAUUGGACAAGGUUUG&AGAAUGUUGUCUGGUUCGAGA	2	192.567	3	0.449572	Output/DS_TL/cleaveLand_result/t_plot/nta-MIR166g-p5_1ss19TA_XM_016600283.1_2083_TPlot.pdf
MSTRG.14179.4:727	nta-miR394	MSTRG.14179.4	MSTRG.14179	LOC107774917	PREDICTED: glutamate--tRNA ligase, chloroplastic/mitochondrial-like isoform X2 [Nicotiana tabacum]	GO:0003723(RNA binding);GO:0004818(glutamate-tRNA ligase activity);GO:0005739(mitochondrion);GO:0006424(glutamyl-tRNA aminoacylation);GO:0009570(chloroplast stroma);GO:0070127(tRNA aminoacylation for mitochondrial protein translation);GO:0070127(tRNA aminoacylation for mitochondrial protein translation)	00860(Porphyrin and chlorophyll metabolism);00970(Aminoacyl-tRNA biosynthesis);00970(Aminoacyl-tRNA biosynthesis)	735	727	0.755102	6	(((((((((((-(((((((.&.))))))).)))))))))))	GGAGGUGGGCA-AGUGCUAC&UUGGCAUUCUGUCCACCUCC	1	96.2835	4	0.451405	Output/DS_TL/cleaveLand_result/t_plot/nta-miR394_MSTRG.14179.4_727_TPlot.pdf
MSTRG.2682.5:2723	nta-miR6146a	MSTRG.2682.5	MSTRG.2682	LOC107813371	protein ROS1-like [Nicotiana tabacum]	GO:0003677(DNA binding);GO:0003906(DNA-(apurinic or apyrimidinic site) lyase activity);GO:0005515(protein binding);GO:0005634(nucleus);GO:0005730(nucleolus);GO:0006281(DNA repair);GO:0006284(base-excision repair);GO:0006306(DNA methylation);GO:0006342(chromatin silencing);GO:0006351(transcription, DNA-templated);GO:0019104(DNA N-glycosylase activity);GO:0031936(negative regulation of chromatin si…	NA	2731	2723	0.73125	7	...((((((((((-((((((((&)))))))).))))))))))...	GCGGAGUGUUUCA-UGGACGAG&UUUGUCCAAUGAAACACUUAUC	1	96.2835	4	0.451405	Output/DS_TL/cleaveLand_result/t_plot/nta-miR6146a_MSTRG.2682.5_2723_TPlot.pdf
XM_016583790.1:1216	nta-miR477a	XM_016583790.1	MSTRG.11024	LOC107765173	PREDICTED: elongation factor 1-gamma 2-like isoform X2 [Nicotiana tabacum]	GO:0003746(translation elongation factor activity);GO:0004364(glutathione transferase activity);GO:0005634(nucleus);GO:0005737(cytoplasm);GO:0006749(glutathione metabolic process);GO:0006749(glutathione metabolic process)	00970(Aminoacyl-tRNA biosynthesis);00970(Aminoacyl-tRNA biosynthesis)	1225	1216	0.764151	6.5	...((((((.(((((((((((.&.)))))))))))-))))))...	UACGAGCCCUUUGAGGGAGAGG&ACUCUCCCUCAA-GGGCUUCUG	1	96.2835	4	0.451405	Output/DS_TL/cleaveLand_result/t_plot/nta-miR477a_XM_016583790.1_1216_TPlot.pdf
XM_016602807.1:1694	nta-miR156g_L+1	XM_016602807.1	107781982	LOC107781982	PREDICTED: squamosa promoter-binding-like protein 2 [Nicotiana sylvestris]	GO:0003677(DNA binding);GO:0003700(transcription factor activity, sequence-specific DNA binding);GO:0005634(nucleus);GO:0006351(transcription, DNA-templated);GO:0006355(regulation of transcription, DNA-templated);GO:0044212(transcription regulatory region DNA binding);GO:0046872(metal ion binding);GO:0048510(regulation of timing of transition from vegetative to reproductive phase);GO:0048653(anth…	NA	1703	1694	0.922865	2	(((((((((.(((((((((((&))))))))))).)))))))))	GUGCUCUCUCUCUUCUGUCAA&UUGACAGAAGAUAGAGAGCAC	1	96.2835	4	0.451405	Output/DS_TL/cleaveLand_result/t_plot/nta-miR156g_L+1_XM_016602807.1_1694_TPlot.pdf
XM_016604355.1:1709	nta-miR172a_R-1	XM_016604355.1	107783385	LOC107783385	PREDICTED: AP2-like ethylene-responsive transcription factor TOE3 isoform X2 [Nicotiana sylvestris]	GO:0003677(DNA binding);GO:0003700(transcription factor activity, sequence-specific DNA binding);GO:0005634(nucleus);GO:0006351(transcription, DNA-templated);GO:0006355(regulation of transcription, DNA-templated);GO:0009908(flower development);GO:0010073(meristem maintenance);GO:0010093(specification of floral organ identity);GO:0019953(sexual reproduction);GO:0030154(cell differentiation);GO:004…	04075(Plant hormone signal transduction);04075(Plant hormone signal transduction)	1718	1709	0.993976	2	(((((((((((((((((((.&.)))))))))))))))))))	UGCAGCAUCAUCAGGAUUCC&AGAAUCUUGAUGAUGCUGCA	1	96.2835	4	0.451405	Output/DS_TL/cleaveLand_result/t_plot/nta-miR172a_R-1_XM_016604355.1_1709_TPlot.pdf
XM_016626965.1:1381	nta-miR156f	XM_016626965.1	107803280	LOC107803280	PREDICTED: squamosa promoter-binding-like protein 16 [Nicotiana tabacum]	GO:0003677(DNA binding);GO:0003700(transcription factor activity, sequence-specific DNA binding);GO:0005634(nucleus);GO:0006351(transcription, DNA-templated);GO:0006355(regulation of transcription, DNA-templated);GO:0046872(metal ion binding);GO:0048653(anther development);GO:0048653(anther development)	NA	1390	1381	0.902579	2	((((((..((((((((((((&))))))))))))..))))))	GUGCUCUCUCUCUUCUGUCA&UGACAGAAGAGAAUGAGCAC	1	96.2835	4	0.451405	Output/DS_TL/cleaveLand_result/t_plot/nta-miR156f_XM_016626965.1_1381_TPlot.pdf
XM_016599358.1:146	nta-MIR6145a-p3	XM_016599358.1	MSTRG.15463	LOC107779018	PREDICTED: 60S ribosomal protein L27a-3-like [Nicotiana tomentosiformis]	GO:0003735(structural constituent of ribosome);GO:0022625(cytosolic large ribosomal subunit)	03010(Ribosome)	155	146	0.682927	6.5	((.(((---((((((((((((&))))))))))))...))).))	GUGGCC---ACGUGAGCGCCG&CGGUGCUCAUGUGAAGGUGAC	5	481.417	2	0.451925	Output/DS_TL/cleaveLand_result/t_plot/nta-MIR6145a-p3_XM_016599358.1_146_TPlot.pdf
XM_016607522.1:822	nta-miR482a	XM_016607522.1	107786088	LOC107786088	PREDICTED: TMV resistance protein N-like [Nicotiana sylvestris]	GO:0005515(protein binding)	03040(Spliceosome);04141(Protein processing in endoplasmic reticulum);04144(Endocytosis)	832	822	0.764075	7	..((((((((((((((.((.(((&)))-)).))))))))))))))..	GCGGAAUGGGUGGAGUCGGUAAA&UUU-CCAAUUCCACCCAUUCCUA	4	385.134	2	0.451925	Output/DS_TL/cleaveLand_result/t_plot/nta-miR482a_XM_016607522.1_822_TPlot.pdf
XM_016585397.1:727	nta-miR164c	XM_016585397.1	MSTRG.11426	LOC107766588	oxygen-evolving enhancer protein 1, chloroplastic-like [Nicotiana tabacum]	GO:0005509(calcium ion binding);GO:0005515(protein binding);GO:0008266(poly(U) RNA binding);GO:0009507(chloroplast);GO:0009534(chloroplast thylakoid);GO:0009535(chloroplast thylakoid membrane);GO:0009543(chloroplast thylakoid lumen);GO:0009570(chloroplast stroma);GO:0009579(thylakoid);GO:0009654(photosystem II oxygen evolving complex);GO:0010205(photoinhibition);GO:0010207(photosystem II assembly…	00195(Photosynthesis)	736	727	0.699301	5.5	((((((((((((.(.((((((&)))))).).))))))))))))	AGCGUGUGCCCUUCCUCUUCA&UGGAGAAGCAGGGCACAUGCU	2	192.567	3	0.452664	Output/DS_TL/cleaveLand_result/t_plot/nta-miR164c_XM_016585397.1_727_TPlot.pdf
MSTRG.6351.1:491	nta-MIR167a-p3	MSTRG.6351.1	MSTRG.6351	LOC107824830	PREDICTED: uncharacterized protein LOC104093709 [Nicotiana tomentosiformis]	GO:0000062(fatty-acyl-CoA binding);GO:0003995(acyl-CoA dehydrogenase activity);GO:0005777(peroxisome);GO:0009055(electron carrier activity);GO:0033539(fatty acid beta-oxidation using acyl-CoA dehydrogenase);GO:0050660(flavin adenine dinucleotide binding);GO:0052890(oxidoreductase activity, acting on the CH-CH group of donors, with a flavin as acceptor);GO:0055088(lipid homeostasis)	NA	499	491	0.742466	7	..(((((((((((((-((((.&.)))).)))))))))))))..	AAUGAAGCUGUUGGA-GACCC&AGGUCAUCUAGCAGCUUCAAU	2	192.567	3	0.458795	Output/DS_TL/cleaveLand_result/t_plot/nta-MIR167a-p3_MSTRG.6351.1_491_TPlot.pdf
XM_016614569.1:1015	nta-MIR6145d-p3	XM_016614569.1	107792359	LOC107792359	PREDICTED: CDK5RAP3-like protein [Nicotiana sylvestris]	GO:0000079(regulation of cyclin-dependent protein serine/threonine kinase activity);GO:0007346(regulation of mitotic cell cycle);GO:0012505(endomembrane system)	NA	1024	1015	0.743671	6	.(((((..((((((((((((&))))))))))))..))))).	UGAUUGGGACAUUGGCACUG&CAGUGUUAGUGUAACAAUCC	2	192.567	2	0.458893	Output/DS_TL/cleaveLand_result/t_plot/nta-MIR6145d-p3_XM_016614569.1_1015_TPlot.pdf
XM_016581248.1:130	nta-miR396b	XM_016581248.1	MSTRG.10206	LOC107762850	PREDICTED: endo-1,3;1,4-beta-D-glucanase-like, partial [Nicotiana tomentosiformis]	GO:0005634(nucleus);GO:0005737(cytoplasm);GO:0005829(cytosol);GO:0005886(plasma membrane);GO:0009651(response to salt stress);GO:0016787(hydrolase activity);GO:0048046(apoplast)	NA	139	130	0.784431	7	.....(((((((((((((((.&.))))))))))))))).....	GAAGACAAGAAGGCUGUGGAG&UUCCACAGCUUUCUUGAACUU	2	192.567	3	0.461835	Output/DS_TL/cleaveLand_result/t_plot/nta-miR396b_XM_016581248.1_130_TPlot.pdf
XM_016590374.1:1177	nta-miR390a_R+1	XM_016590374.1	MSTRG.12760	LOC107771044	PREDICTED: splicing factor 3B subunit 2 [Nicotiana sylvestris]	GO:0000398(mRNA splicing, via spliceosome);GO:0005684(U2-type spliceosomal complex);GO:0005686(U2 snRNP);GO:0005689(U12-type spliceosomal complex);GO:0071011(precatalytic spliceosome);GO:0071013(catalytic step 2 spliceosome)	03040(Spliceosome)	1186	1177	0.655405	6.5	(((((((..(((((((.((((.&.)))).)))))))..)))))))	AGGUGCUCCUCCUCCUUGGCUC&AAGCUCAGGAGGGAUAGCACCU	2	192.567	3	0.461835	Output/DS_TL/cleaveLand_result/t_plot/nta-miR390a_R+1_XM_016590374.1_1177_TPlot.pdf
XM_016638140.1:491	nta-MIR172i-p5	XM_016638140.1	MSTRG.26118	LOC107812954	PREDICTED: zinc finger CCCH domain-containing protein 29-like [Nicotiana tomentosiformis]	GO:0003677(DNA binding);GO:0003700(transcription factor activity, sequence-specific DNA binding);GO:0005634(nucleus);GO:0006355(regulation of transcription, DNA-templated);GO:0009409(response to cold);GO:0010200(response to chitin);GO:0046872(metal ion binding);GO:0050832(defense response to fungus)	NA	500	491	0.743363	4.5	((((((((-(((((((((.((&)).))))))))).))))))))	UGUGGAUC-UGAUGGUGCAAC&GUAGCAUCAUCAAGAUUCACA	6	577.701	3	0.461835	Output/DS_TL/cleaveLand_result/t_plot/nta-MIR172i-p5_XM_016638140.1_491_TPlot.pdf
MSTRG.1957.2:1394	nta-MIR6145f-p3	MSTRG.1957.2	MSTRG.1957	LOC107791195	PREDICTED: glycerophosphodiester phosphodiesterase GDPD6-like [Nicotiana tomentosiformis]	GO:0005576(extracellular region);GO:0005618(cell wall);GO:0005773(vacuole);GO:0005886(plasma membrane);GO:0006071(glycerol metabolic process);GO:0006629(lipid metabolic process);GO:0008889(glycerophosphodiester phosphodiesterase activity)	00564(Glycerophospholipid metabolism)	1403	1394	0.715818	6	(((.((((((((.((((((..&..)))))).)))))))).)))	GAUCUCGUAGCAAGAGCACAU&CAGUGCUCAUGCUACGAUAUC	1	96.2835	4	0.463469	Output/DS_TL/cleaveLand_result/t_plot/nta-MIR6145f-p3_MSTRG.1957.2_1394_TPlot.pdf
[truncated: 1,255 more rows]
