# Supplementary material for: Small RNA and Degradome Sequencing Reveal Important MicroRNA Function in Nicotiana tabacum Response to Bemisia tabaci
Source: MDPI journal article supplement (doi:10.3390/genes13020361), 2022-02-17
Supplement: s1 [file Supplementary Figures_20220216.pdf › Supplementary Figures_20220216.pdf]

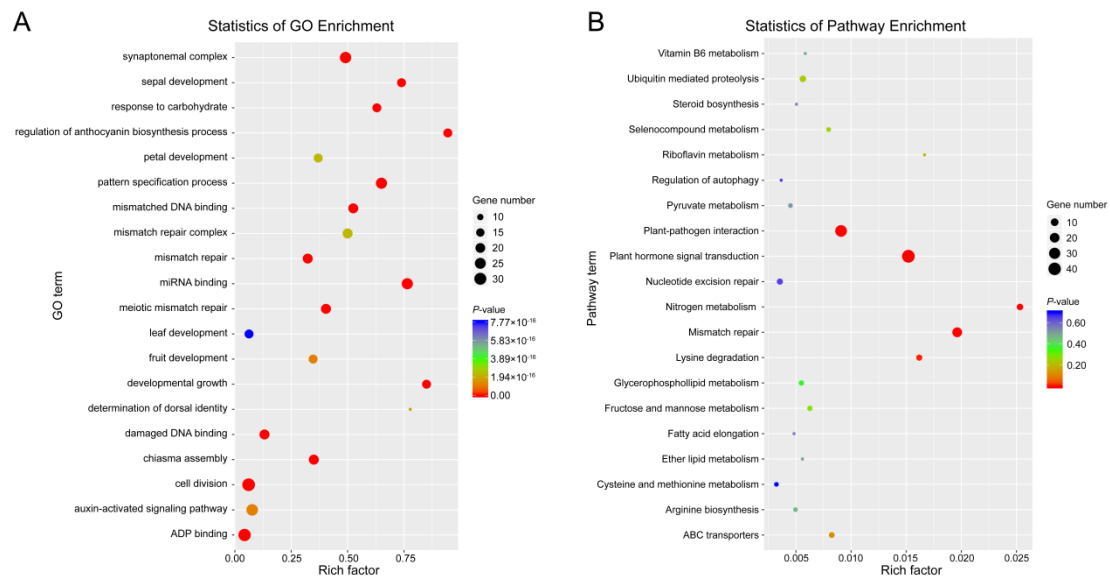

**Figure S1.** GO and KEGG analysis of the genes targeted by upregulated miRNAs. (A) shows the result of GO analysis and (B) shows the result of KEGG analysis.

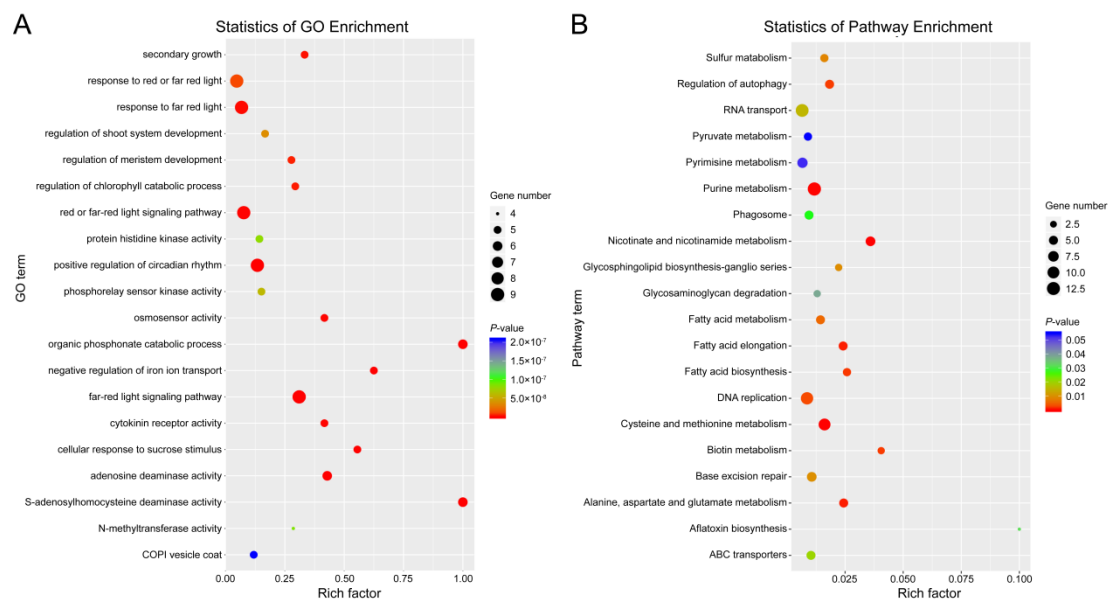

**Figure S2.** GO and KEGG analysis of the genes targeted by downregulated miRNAs. (A) shows the result of GO analysis and (B) shows the result of KEGG analysis.
