# Supplementary material for: Small RNA and Degradome Sequencing Reveal Important MicroRNA Function in Nicotiana tabacum Response to Bemisia tabaci
Source: MDPI journal article supplement (doi:10.3390/genes13020361), 2022-02-17
Supplement: s1 [file Supplementary Table S1_20220216.xlsx]

## Sheet: Table S1
Table S1. Length distribution of counts of sequences and unique sRNAs in this study.
	Control_1		Control_2		Control_3			Infected_1		Infected_2		Infected_3
Length (nt)	Unique reads	% of unique	Unique reads	% of unique	Unique reads	% of unique		Unique reads	% of unique	Unique reads	% of unique	Unique reads	% of unique
18	37847	0.96	37307	0.8	26495	0.54		24598	0.51	35451	0.69	23712	0.48
19	53392	1.35	54523	1.17	39993	0.81		36394	0.75	52430	1.02	36745	0.75
20	82303	2.08	85875	1.84	70086	1.43		62749	1.3	86476	1.68	65894	1.34
21	260610	6.59	263925	5.66	271543	5.53		233331	4.83	287803	5.58	247784	5.03
22	276475	6.99	299461	6.42	307865	6.27		276300	5.72	326149	6.33	289764	5.89
23	276687	7	330797	7.09	320032	6.51		314241	6.5	362276	7.03	328961	6.68
24	2827889	71.53	3423948	73.43	3717732	75.67		3690030	76.37	3849401	74.69	3755904	76.29
25	138387	3.5	166859	3.58	159125	3.24		194318	4.02	153923	2.99	174593	3.55
