# Supplementary material for: Small RNA and Degradome Sequencing Reveal Important MicroRNA Function in Nicotiana tabacum Response to Bemisia tabaci
Source: MDPI journal article supplement (doi:10.3390/genes13020361), 2022-02-17
Supplement: s1 [file Supplementary Table S2_20220216.xlsx]

## Sheet: Table S2
Table S2. Conservation profile of the identified miRNAs.
	MIR156	MIR157	MIR159	MIR160	MIR162	MIR164	MIR165	MIR166	MIR167	MIR168	MIR169	MIR170	MIR171	MIR172	MIR319	MIR384	MIR390	MIR391	MIR393	MIR394	MIR395	MIR396	MIR397	MIR398	MIR399	MIR403	MIR408	MIR444	MIR472	MIR477	MIR479	MIR482	MIR528	MIR529	MIR530	MIR535	MIR536	MIR827	MIR829	MIR858	MIR1446	MIR1511	MIR1515	MIR1919	MIR2111	MIR2118	MIR2275	MIR2592	MIR2603
aau	-	-	-	-	-	-	-	-	-	-	-	-	-	-	-	-	-	-	-	-	-	1+	-	-	-	-	-	-	-	-	-	-	-	-	-	-	-	-	-	-	-	-	-	-	-	-	-	-	-
ahy	2+	-	1+	-	-	-	-	-	1+	-	-	-	-	-	-	-	-	-	-	-	-	-	-	1+	-	-	-	-	-	-	-	-	-	-	-	-	-	-	-	-	-	-	-	-	-	-	-	-	-
aly	2+	1+	3+	-	2+	2+	2+	6+	4+	1+	2+	1+	1+	-	3+	-	2+	-	2+	2+	-	2+	-	1+	2+	2+	-	-	-	-	-	-	-	-	-	-	-	-	-	-	-	-	-	-	3+	-	-	-	-
ama	-	-	-	-	-	-	-	-	-	-	-	-	-	-	-	-	-	-	-	-	-	1+	-	-	-	-	-	-	-	-	-	-	-	-	-	-	-	-	-	-	-	-	-	-	-	-	-	-	-
amg	-	-	-	-	-	-	-	-	-	-	-	-	-	-	-	-	-	-	-	-	-	1+	-	-	-	-	-	-	-	-	-	-	-	-	-	-	-	-	-	-	-	-	-	-	-	-	-	-	-
aof	1+	-	1+	1+	-	-	-	3+	3+	1+	-	-	2+	-	-	-	-	-	2+	-	-	2+	-	-	1+	-	1+	-	-	-	-	1+	-	-	-	1+	-	-	-	-	-	-	-	-	-	-	-	-	-
aqc	-	-	1+	-	-	-	-	3+	1+	-	-	-	2+	-	-	-	-	-	-	-	-	2+	-	1+	-	-	-	-	-	-	-	3+	-	1+	-	1+	-	-	-	-	-	-	-	-	-	-	-	-	-
ata	2+	-	-	3+	-	2+	-	3+	6+	-	4+	-	2+	-	-	-	1+	-	1+	1+	-	1+	-	-	-	-	1+	-	-	-	-	-	1+	-	-	-	-	-	-	-	-	-	-	-	-	1+	-	-	-
ath	3+	2+	3+	-	2+	2+	2+	5+	4+	1+	2+	1+	1+	-	1+	-	2+	-	2+	2+	-	2+	-	1+	2+	1+	-	-	-	-	-	-	-	-	-	-	-	-	1+	-	-	-	-	-	2+	-	-	-	-
bcy	1+	-	-	-	-	-	-	-	-	-	-	-	-	-	-	-	-	-	-	-	-	2+	-	-	-	-	-	-	-	-	-	-	-	-	-	-	-	-	-	-	-	-	-	-	-	-	-	-	-
bdi	4+	-	2+	3+	1+	2+	-	5+	7+	-	3+	-	3+	1+	-	-	1+	-	2+	1+	-	2+	2+	2+	-	-	1+	2+	-	-	-	-	1+	-	2+	-	-	-	-	-	-	-	-	-	-	1+	-	-	-
bgy	1+	-	-	-	-	-	-	-	-	-	-	-	-	-	-	-	-	-	-	-	-	2+	-	-	-	-	-	-	-	-	-	-	-	-	-	-	-	-	-	-	-	-	-	-	-	-	-	-	-
bna	2+	-	1+	2+	-	4+	-	4+	4+	1+	-	-	3+	-	-	-	2+	-	1+	2+	-	1+	-	-	-	1+	-	-	-	-	-	-	-	-	-	-	-	-	-	-	-	-	-	-	3+	-	-	-	-
bol	-	-	-	-	-	-	-	-	-	-	-	-	-	-	-	-	-	-	-	-	-	-	-	1+	-	-	-	-	-	-	-	-	-	-	-	-	-	-	-	-	-	-	-	-	-	-	-	-	-
bra	2+	-	1+	-	1+	5+	-	-	4+	3+	-	-	2+	-	-	-	-	-	-	-	-	1+	-	-	-	1+	-	-	-	-	-	-	-	-	-	-	-	-	-	-	-	-	-	-	2+	-	-	-	-
cas	4+	1+	3+	-	1+	1+	1+	5+	3+	1+	1+	1+	2+	-	2+	-	2+	-	1+	1+	-	2+	-	1+	1+	1+	1+	-	1+	-	-	-	-	-	-	-	-	-	-	-	-	-	-	-	2+	-	-	-	-
cca	2+	-	-	-	-	1+	-	-	1+	-	-	-	-	-	-	-	-	-	-	1+	-	2+	-	-	-	-	1+	-	-	-	-	-	-	-	-	-	-	-	-	-	-	-	-	-	-	-	-	-	-
ccl	-	-	-	-	-	-	-	-	2+	1+	-	-	1+	-	-	-	-	-	-	-	-	-	-	-	-	-	-	-	-	-	-	-	-	-	-	-	-	-	-	-	-	-	-	-	-	-	-	-	-
cme	6+	-	1+	1+	-	3+	-	7+	6+	1+	3+	-	5+	1+	3+	-	1+	-	3+	2+	2+	4+	-	1+	-	-	1+	-	-	-	-	-	-	-	1+	-	-	-	-	1+	-	-	-	-	2+	-	-	-	-
cpa	2+	-	2+	-	1+	2+	-	4+	4+	-	1+	-	-	-	1+	-	-	-	1+	-	-	1+	-	-	-	-	-	-	-	-	-	-	-	-	-	1+	-	-	-	-	-	-	-	-	-	-	-	-	-
crt	-	-	-	-	-	-	-	2+	-	1+	-	-	-	-	-	-	-	-	-	-	-	-	-	-	-	-	-	-	-	-	-	-	-	-	-	-	-	-	-	-	-	-	-	-	-	-	-	-	-
csi	5+	-	2+	2+	1+	3+	-	8+	4+	1+	2+	-	3+	1+	-	-	1+	-	3+	1+	-	5+	1+	1+	1+	2+	-	-	-	-	-	-	-	-	-	-	1+	-	-	1+	-	-	2+	-	1+	-	-	-	-
cst	-	-	-	-	-	-	-	-	-	-	-	-	-	-	-	-	-	-	-	-	-	-	-	-	-	-	-	-	-	-	-	-	-	-	-	-	-	-	-	-	-	-	-	-	-	-	-	-	-
ctr	-	-	-	-	-	-	-	1+	1+	-	-	-	-	-	1+	-	-	-	-	-	-	-	-	-	-	-	-	-	-	-	-	-	-	-	-	-	-	-	-	-	-	-	-	-	-	-	-	-	-
dpr	-	-	-	1+	-	-	-	2+	2+	-	-	-	-	-	-	-	-	-	-	-	-	-	-	-	-	-	1+	-	-	-	-	-	-	-	-	-	-	-	-	-	-	-	-	-	-	-	-	-	-
eun	-	-	-	-	-	-	-	1+	2+	-	-	-	-	-	-	-	-	-	-	-	-	2+	1+	-	-	-	-	-	-	-	-	-	-	-	1+	2+	-	-	-	-	-	-	-	-	-	-	-	-	-
far	2+	-	1+	1+	-	-	-	-	-	-	-	-	1+	-	-	-	-	-	-	-	-	-	-	-	-	-	-	-	-	-	-	-	-	1+	-	-	-	-	-	-	-	-	-	-	-	-	-	-	-
fve	6+	-	2+	1+	-	2+	-	4+	3+	-	1+	-	3+	-	-	-	-	-	2+	1+	-	4+	1+	-	1+	-	1+	-	-	-	-	-	-	-	1+	-	-	-	-	-	-	-	-	-	3+	-	-	-	-
ghr	1+	-	-	-	1+	1+	-	-	1+	-	-	-	-	-	-	-	3+	-	1+	2+	-	2+	-	1+	-	-	-	-	-	-	-	-	-	-	-	-	-	-	-	-	-	-	-	-	-	-	-	-	-
gma	12+	-	2+	-	1+	11+	-	16+	8+	2+	-	-	6+	4+	4+	-	2+	1+	11+	4+	-	5+	2+	2+	4+	2+	1+	-	-	-	-	-	-	-	-	-	-	-	-	-	-	-	-	-	6+	-	-	-	-
gra	-	1+	-	-	-	-	-	2+	1+	-	-	-	-	-	-	-	-	-	-	-	-	-	-	1+	1+	-	-	-	-	-	-	1+	-	-	1+	-	-	-	-	-	-	-	-	-	-	-	-	-	-
gso	-	-	-	-	-	-	-	-	1+	-	-	-	-	-	-	-	-	-	-	-	-	-	-	-	-	-	-	-	-	-	-	-	-	-	-	-	-	-	-	-	-	-	-	-	-	-	-	-	-
han	3+	-	-	-	-	-	-	-	-	-	-	-	-	-	-	-	-	-	-	-	-	-	-	-	-	-	-	-	-	-	-	-	-	-	-	-	-	-	-	-	-	-	-	-	-	-	-	-	-
har	1+	-	-	-	-	-	-	-	-	-	-	-	-	-	-	-	-	-	-	-	-	-	-	-	-	1+	-	-	-	-	-	-	-	-	-	-	-	-	-	-	-	-	-	-	-	-	-	-	-
hbr	-	-	1+	-	-	-	-	1+	-	-	-	-	-	-	-	-	-	-	-	-	-	1+	-	-	-	-	2+	-	-	-	-	1+	-	-	-	-	-	-	-	-	-	-	-	-	-	-	-	-	-
hex	-	-	-	-	-	-	-	-	-	-	-	-	-	-	-	-	2+	-	-	-	-	-	-	-	-	-	-	-	-	-	-	-	-	-	-	-	-	-	-	-	-	-	-	-	-	-	-	-	-
hpa	-	-	-	-	-	-	-	1+	-	-	-	-	-	-	-	-	-	-	-	-	-	-	-	-	-	-	-	-	-	-	-	-	-	-	-	-	-	-	-	-	-	-	-	-	-	-	-	-	-
hpe	-	-	-	-	1+	-	-	1+	-	-	-	-	-	-	-	-	-	-	-	-	-	-	-	-	-	1+	-	-	-	-	-	-	-	-	-	-	-	-	-	-	-	-	-	-	-	-	-	-	-
htu	1+	-	1+	1+	1+	-	-	-	-	-	-	-	-	-	-	-	-	-	3+	-	-	-	-	-	-	5+	-	-	-	-	-	-	-	-	-	-	-	-	-	-	-	-	-	-	-	-	-	-	-
hvu	-	-	2+	-	-	-	-	3+	-	-	-	-	1+	-	-	-	-	-	-	-	-	-	-	-	-	-	-	-	-	-	-	-	-	-	-	-	-	-	-	-	-	-	-	-	-	-	-	-	-
lja	-	-	-	-	-	-	-	-	4+	1+	-	-	1+	-	-	-	1+	-	-	-	-	1+	1+	1+	-	-	-	-	-	-	-	-	-	-	-	-	-	-	-	-	-	-	-	-	1+	-	-	-	-
lus	1+	-	2+	-	2+	5+	-	11+	7+	1+	3+	-	5+	2+	1+	-	4+	-	4+	2+	-	4+	2+	-	-	-	1+	-	-	-	-	-	-	-	-	-	-	-	-	-	-	-	-	-	-	-	-	-	-
mdm	25+	-	6+	-	-	5+	-	9+	8+	-	5+	-	10+	1+	2+	-	1+	-	8+	2+	-	7+	2+	1+	2+	2+	4+	-	-	-	-	3+	-	-	-	2+	-	-	-	-	-	1+	-	-	2+	3+	-	-	-
mes	6+	-	2+	1+	1+	3+	-	7+	7+	1+	7+	-	3+	2+	4+	-	1+	-	4+	2+	-	6+	1+	-	1+	2+	1+	-	-	-	-	-	-	-	-	1+	-	-	-	-	-	-	-	-	2+	-	-	-	-
mtr	5+	-	1+	-	-	3+	-	6+	2+	1+	1+	-	4+	1+	1+	-	-	-	2+	-	1+	2+	1+	1+	2+	-	1+	-	-	-	-	-	-	-	-	-	-	-	-	-	-	-	-	-	14+	-	-	3+	1+
nta	10+	-	1+	4+	2+	3+	-	8+	5+	5+	19+	-	3+	9+	2+	-	3+	-	-	1+	3+	3+	1+	1+	7+	-	1+	-	-	1+	2+	4+	-	-	-	-	-	1+	-	-	1+	-	-	1+	-	-	-	-	-
osa	7+	-	4+	4+	2+	2+	-	9+	10+	-	2+	-	3+	-	-	-	1+	-	2+	1+	-	2+	2+	1+	1+	-	1+	-	-	-	-	-	1+	-	1+	1+	-	-	-	-	-	-	-	-	-	2+	1+	-	-
peu	-	-	-	-	-	-	-	-	-	-	-	-	-	-	-	-	-	-	-	-	-	-	-	-	-	-	-	-	-	-	-	-	-	-	-	-	-	-	-	-	-	-	-	-	-	-	-	-	-
pgi	-	-	-	-	-	-	-	-	-	-	-	-	-	-	-	-	-	-	-	-	-	-	-	-	-	-	-	-	-	-	-	-	-	-	-	-	-	-	-	-	-	-	-	-	-	1+	-	-	-
ppe	2+	-	1+	-	-	3+	-	4+	3+	-	1+	-	2+	1+	1+	-	-	-	2+	2+	-	2+	1+	-	-	1+	-	-	-	-	-	1+	-	-	1+	2+	-	-	-	1+	-	1+	-	-	4+	-	-	-	-
ptc	3+	-	3+	-	2+	4+	-	13+	7+	2+	6+	-	2+	2+	5+	-	2+	-	3+	1+	-	4+	2+	1+	-	4+	1+	-	-	-	-	1+	-	-	-	-	-	-	-	-	-	-	-	-	2+	-	-	-	-
pvu	-	-	1+	-	-	-	-	-	-	-	-	-	-	-	1+	-	-	-	-	-	-	-	-	-	1+	-	-	-	-	-	-	-	-	-	-	-	-	-	-	-	-	-	-	-	-	-	-	-	-
rco	3+	-	1+	-	1+	2+	-	3+	3+	1+	-	-	2+	1+	3+	-	2+	-	1+	-	-	1+	1+	1+	1+	2+	1+	-	-	-	-	-	-	-	-	1+	-	-	-	-	-	-	-	-	-	-	-	-	-
rgl	-	-	-	-	-	-	-	-	-	-	-	-	-	-	-	-	-	-	-	-	-	-	-	-	-	-	-	-	-	-	-	-	-	-	-	-	-	-	-	-	-	-	-	-	-	-	-	-	-
sbi	2+	-	2+	3+	1+	2+	-	7+	7+	-	1+	-	3+	-	-	-	1+	-	2+	2+	-	2+	-	1+	2+	-	1+	-	-	-	-	-	1+	-	-	-	-	-	-	-	-	-	-	-	-	-	-	-	-
seu	-	-	-	-	-	-	-	-	-	-	-	-	-	-	1+	-	-	-	-	-	-	-	-	-	-	-	-	-	-	-	-	-	-	-	-	-	-	-	-	-	-	-	-	-	-	-	-	-	-
sly	1+	-	-	-	-	1+	-	2+	-	1+	2+	-	5+	1+	1+	-	1+	1+	1+	1+	2+	2+	-	1+	1+	1+	1+	-	-	-	-	3+	-	-	-	-	-	1+	-	-	-	-	-	2+	-	-	-	-	-
sof	-	-	5+	-	-	-	-	-	2+	-	-	-	-	-	-	-	-	-	-	-	-	1+	-	-	-	-	4+	-	-	-	-	-	-	-	-	-	-	-	-	-	-	-	-	-	-	-	-	-	-
ssl	-	-	-	-	-	1+	-	1+	-	-	-	-	1+	-	-	-	-	-	-	1+	-	1+	-	1+	-	-	-	-	-	-	-	-	-	-	-	-	-	-	-	-	-	-	-	-	-	-	-	-	-
stu	5+	-	-	-	2+	-	-	3+	3+	-	1+	-	2+	2+	2+	1+	1+	1+	1+	-	6+	-	-	2+	5+	-	-	-	-	1+	-	3+	-	-	-	-	-	-	-	-	-	-	-	1+	-	-	-	-	-
tae	-	-	2+	1+	-	-	-	-	2+	-	-	-	-	-	-	-	-	-	-	-	-	-	1+	-	-	-	1+	-	-	-	-	-	-	-	-	-	-	-	-	-	-	-	-	-	-	-	-	-	-
tcc	2+	-	-	-	1+	2+	-	2+	2+	1+	2+	-	2+	2+	-	-	-	-	2+	2+	-	5+	1+	1+	1+	2+	-	-	-	-	-	-	-	-	2+	-	-	-	-	-	-	-	-	-	1+	-	-	-	-
ttu	-	-	-	1+	-	-	-	-	-	-	-	-	-	-	-	-	-	-	-	-	-	-	-	-	-	-	-	-	-	-	-	-	-	-	-	-	-	-	-	-	-	-	-	-	-	-	-	-	-
vca	1+	-	1+	-	-	-	-	1+	2+	-	-	-	-	-	-	-	-	-	1+	-	-	1+	-	-	-	-	1+	-	-	-	-	-	1+	-	-	-	-	-	-	-	-	-	-	-	-	-	-	-	-
vun	1+	-	-	-	-	-	-	-	-	1+	1+	-	-	-	1+	-	-	-	-	-	-	-	-	-	1+	-	-	-	-	-	-	-	-	-	-	-	-	-	-	-	-	-	-	-	-	-	-	-	-
vvi	1+	-	1+	1+	-	1+	-	7+	4+	1+	5+	-	3+	1+	2+	-	-	-	2+	1+	-	3+	1+	1+	2+	6+	-	-	-	-	-	-	-	-	-	3+	-	-	-	-	-	-	-	-	-	-	-	-	-
zma	4+	-	7+	4+	-	4+	-	8+	8+	-	1+	-	3+	-	-	-	2+	-	3+	2+	-	2+	-	1+	3+	-	2+	2+	-	-	-	-	2+	-	-	-	-	-	-	-	-	-	-	-	-	-	2+	-	-
[truncated: 89 more columns]
