# Supplementary material for: Small RNA and Degradome Sequencing Reveal Important MicroRNA Function in Nicotiana tabacum Response to Bemisia tabaci
Source: MDPI journal article supplement (doi:10.3390/genes13020361), 2022-02-17
Supplement: s1 [file Supplementary Table S3_20220216.xlsx]

## Sheet: Table S3
Table S3. Gene Ontology (GO) analysis of target genes in miRNA sequencing. Statistical significance was evaluated using Fisher's exact test, the P value colored with red was evaluated at P<0.01, the blue was at P<0.05.
GO Id	Function	GO_term	Gene number	P value
GO:0051301	biological_process	cell division	32	0
GO:0048366	biological_process	leaf development	21	0
GO:0009734	biological_process	auxin-activated signaling pathway	29	0
GO:0010154	biological_process	fruit development	17	0
GO:0035198	molecular_function	miRNA binding	26	2.41351e-51
GO:0007389	biological_process	pattern specification process	26	2.98351e-48
GO:0031540	biological_process	regulation of anthocyanin biosynthetic process	17	3.16391e-37
GO:0048589	biological_process	developmental growth	17	1.98157e-35
GO:0048442	biological_process	sepal development	17	1.72555e-33
GO:0009743	biological_process	response to carbohydrate	17	1.41024e-31
GO:0048441	biological_process	petal development	17	1.11022e-16
GO:0048829	biological_process	root cap development	26	2.22045e-16
GO:0071897	biological_process	DNA biosynthetic process	7	3.08672e-16
GO:0009738	biological_process	abscisic acid-activated signaling pathway	27	9.99201e-16
GO:0010018	biological_process	far-red light signaling pathway	9	1.00475e-13
GO:0004565	molecular_function	beta-galactosidase activity	10	8.4599e-13
GO:0042753	biological_process	positive regulation of circadian rhythm	9	3.4979e-10
GO:0043531	molecular_function	ADP binding	23	4.08195e-10
GO:0004047	molecular_function	aminomethyltransferase activity	4	1.38913e-09
GO:0048255	biological_process	mRNA stabilization	6	2.5641e-09
GO:0004174	molecular_function	electron-transferring-flavoprotein dehydrogenase activity	4	6.91193e-09
GO:0017091	molecular_function	AU-rich element binding	6	8.19661e-09
GO:0050521	molecular_function	alpha-glucan, water dikinase activity	4	2.06351e-08
GO:0009693	biological_process	ethylene biosynthetic process	8	2.19378e-08
GO:0006355	biological_process	regulation of transcription, DNA-templated	69	3.45e-08
GO:0046854	biological_process	phosphatidylinositol phosphorylation	5	3.48421e-08
GO:0006952	biological_process	defense response	32	5.05252e-08
GO:0010017	biological_process	red or far-red light signaling pathway	9	5.15859e-08
GO:0004709	molecular_function	MAP kinase kinase kinase activity	5	6.76571e-08
GO:0010218	biological_process	response to far red light	9	1.5593e-07
GO:0005524	molecular_function	ATP binding	59	1.5822e-07
GO:0005515	molecular_function	protein binding	69	1.74744e-07
GO:0070537	biological_process	histone H2A K63-linked deubiquitination	3	2.2831e-07
GO:0006552	biological_process	leucine catabolic process	4	2.83324e-07
GO:0006351	biological_process	transcription, DNA-templated	56	3.9086e-07
GO:0006730	biological_process	one-carbon metabolic process	7	4.27948e-07
GO:0008219	biological_process	cell death	7	8.58295e-07
GO:0006997	biological_process	nucleus organization	5	1.05916e-06
GO:0004089	molecular_function	carbonate dehydratase activity	6	1.14873e-06
GO:0003700	molecular_function	sequence-specific DNA binding transcription factor activity	56	1.20884e-06
GO:0008170	molecular_function	N-methyltransferase activity	4	1.3245e-06
GO:0006974	biological_process	cellular response to DNA damage stimulus	7	1.7273e-06
GO:0003887	molecular_function	DNA-directed DNA polymerase activity	8	2.09161e-06
GO:0008120	molecular_function	ceramide glucosyltransferase activity	3	2.26232e-06
GO:0006679	biological_process	glucosylceramide biosynthetic process	3	2.26232e-06
GO:0009639	biological_process	response to red or far red light	9	3.0939e-06
GO:0016773	molecular_function	phosphotransferase activity, alcohol group as acceptor	5	4.08946e-06
GO:2001022	biological_process	positive regulation of response to DNA damage stimulus	3	4.504e-06
GO:0030261	biological_process	chromosome condensation	3	4.504e-06
GO:0003886	molecular_function	DNA (cytosine-5-)-methyltransferase activity	4	6.2267e-06
GO:0003684	molecular_function	damaged DNA binding	8	7.37246e-06
GO:0009610	biological_process	response to symbiotic fungus	4	9.31029e-06
GO:0004430	molecular_function	1-phosphatidylinositol 4-kinase activity	5	9.39898e-06
GO:0000453	biological_process	enzyme-directed rRNA 2'-O-methylation	3	1.24965e-05
GO:0005575	cellular_component	cellular_component	22	1.60022e-05
GO:0000796	cellular_component	condensin complex	3	1.86593e-05
GO:0034968	biological_process	histone lysine methylation	5	2.08295e-05
GO:0010224	biological_process	response to UV-B	7	3.44671e-05
GO:0004644	molecular_function	phosphoribosylglycinamide formyltransferase activity	2	3.74393e-05
GO:0009646	biological_process	response to absence of light	6	3.74544e-05
GO:0051567	biological_process	histone H3-K9 methylation	4	4.36032e-05
GO:0004617	molecular_function	phosphoglycerate dehydrogenase activity	3	4.8205e-05
GO:0009070	biological_process	serine family amino acid biosynthetic process	3	4.8205e-05
GO:0045739	biological_process	positive regulation of DNA repair	3	4.8205e-05
GO:0000428	cellular_component	DNA-directed RNA polymerase complex	3	4.8205e-05
GO:0005740	cellular_component	mitochondrial envelope	4	5.56912e-05
GO:0008650	molecular_function	rRNA (uridine-2'-O-)-methyltransferase activity	3	6.23813e-05
GO:0051539	molecular_function	4 iron, 4 sulfur cluster binding	7	6.43682e-05
GO:0009733	biological_process	response to auxin	13	8.82221e-05
GO:0030176	cellular_component	integral component of endoplasmic reticulum membrane	5	8.99304e-05
GO:0031081	biological_process	nuclear pore distribution	2	0.000111861
GO:0016458	biological_process	gene silencing	4	0.000117563
GO:0051980	molecular_function	iron-nicotianamine transmembrane transporter activity	3	0.000120486
GO:0045893	biological_process	positive regulation of transcription, DNA-templated	13	0.000130623
GO:0003677	molecular_function	DNA binding	56	0.00013403
GO:0018826	molecular_function	methionine gamma-lyase activity	2	0.000222813
GO:0035252	molecular_function	UDP-xylosyltransferase activity	2	0.000222813
GO:0004385	molecular_function	guanylate kinase activity	2	0.000222813
GO:0008756	molecular_function	o-succinylbenzoate-CoA ligase activity	2	0.000222813
GO:0019458	biological_process	methionine catabolic process via 2-oxobutanoate	2	0.000222813
GO:0090406	cellular_component	pollen tube	6	0.000230957
GO:0000793	cellular_component	condensed chromosome	3	0.000240848
GO:0010150	biological_process	leaf senescence	7	0.000255916
GO:0003006	biological_process	developmental process involved in reproduction	3	0.000279713
GO:0010039	biological_process	response to iron ion	3	0.000279713
GO:0050275	molecular_function	scopoletin glucosyltransferase activity	2	0.000369847
GO:0048830	biological_process	adventitious root development	2	0.000369847
GO:0048658	biological_process	anther wall tapetum development	3	0.000474996
GO:0030154	biological_process	cell differentiation	11	0.000483009
GO:0009631	biological_process	cold acclimation	5	0.000514451
GO:0000170	molecular_function	sphingosine hydroxylase activity	2	0.000552519
GO:0046520	biological_process	sphingoid biosynthetic process	2	0.000552519
GO:0080092	biological_process	regulation of pollen tube growth	4	0.000585214
GO:0007076	biological_process	mitotic chromosome condensation	3	0.000598607
GO:0009554	biological_process	megasporogenesis	3	0.000598607
GO:0031047	biological_process	gene silencing by RNA	5	0.000716101
GO:0033843	molecular_function	xyloglucan 6-xylosyltransferase activity	2	0.000770388
GO:0009970	biological_process	cellular response to sulfate starvation	2	0.000770388
GO:0051607	biological_process	defense response to virus	5	0.000774618
GO:0005983	biological_process	starch catabolic process	4	0.000876892
GO:0018024	molecular_function	histone-lysine N-methyltransferase activity	5	0.00120369
GO:0010492	biological_process	maintenance of shoot apical meristem identity	3	0.00129171
GO:0042626	molecular_function	ATPase activity, coupled to transmembrane movement of substances	9	0.00133439
GO:0048768	biological_process	root hair cell tip growth	3	0.00140277
GO:0016310	biological_process	phosphorylation	12	0.00143494
GO:0007021	biological_process	tubulin complex assembly	3	0.00151965
GO:0009152	biological_process	purine ribonucleotide biosynthetic process	2	0.00163084
GO:0000972	biological_process	transcription-dependent tethering of RNA polymerase II gene DNA at nuclear periphery	2	0.00163084
GO:0016742	molecular_function	hydroxymethyl-, formyl- and related transferase activity	2	0.00163084
GO:0008864	molecular_function	formyltetrahydrofolate deformylase activity	2	0.00163084
GO:0005635	cellular_component	nuclear envelope	5	0.00173203
GO:0005773	cellular_component	vacuole	17	0.00173421
GO:0006289	biological_process	nucleotide-excision repair	4	0.00190205
GO:0000481	biological_process	maturation of 5S rRNA	2	0.00198518
GO:0000987	molecular_function	core promoter proximal region sequence-specific DNA binding	2	0.00198518
GO:0008810	molecular_function	cellulase activity	3	0.00204748
GO:0030245	biological_process	cellulose catabolic process	3	0.00204748
GO:0090332	biological_process	stomatal closure	3	0.00234901
GO:0009653	biological_process	anatomical structure morphogenesis	2	0.00237257
GO:0048638	biological_process	regulation of developmental growth	2	0.00279261
GO:0031080	cellular_component	nuclear pore outer ring	2	0.00324487
GO:0010344	biological_process	seed oilbody biogenesis	2	0.00324487
GO:0046964	molecular_function	3'-phosphoadenosine 5'-phosphosulfate transmembrane transporter activity	2	0.00324487
GO:0015198	molecular_function	oligopeptide transporter activity	3	0.00341314
GO:0005694	cellular_component	chromosome	5	0.00353823
GO:0012511	cellular_component	monolayer-surrounded lipid storage body	2	0.00372895
GO:0016226	biological_process	iron-sulfur cluster assembly	4	0.00381086
GO:0001055	molecular_function	RNA polymerase II activity	3	0.0038233
GO:0043565	molecular_function	sequence-specific DNA binding	16	0.00387563
GO:0005634	cellular_component	nucleus	164	0.00411796
GO:0052543	biological_process	callose deposition in cell wall	2	0.00424444
GO:0051321	biological_process	meiotic cell cycle	3	0.00426223
GO:0030173	cellular_component	integral component of Golgi membrane	3	0.00449267
GO:0008327	molecular_function	methyl-CpG binding	3	0.00473051
GO:0010208	biological_process	pollen wall assembly	2	0.00479095
GO:0080168	biological_process	abscisic acid transport	2	0.00479095
GO:0090440	molecular_function	abscisic acid transporter activity	2	0.00479095
GO:0006306	biological_process	DNA methylation	4	0.00512856
GO:0003899	molecular_function	DNA-directed RNA polymerase activity	3	0.00575724
GO:0005743	cellular_component	mitochondrial inner membrane	5	0.00586789
GO:0009969	biological_process	xyloglucan biosynthetic process	2	0.00597541
GO:0000777	cellular_component	condensed chromosome kinetochore	2	0.00597541
GO:0004003	molecular_function	ATP-dependent DNA helicase activity	3	0.00631667
GO:2000031	biological_process	regulation of salicylic acid mediated signaling pathway	2	0.00661259
GO:0006189	biological_process	'de novo' IMP biosynthetic process	2	0.00797489
GO:0045292	biological_process	mRNA cis splicing, via spliceosome	2	0.00945192
GO:0051289	biological_process	protein homotetramerization	2	0.0102325
GO:0050826	biological_process	response to freezing	2	0.0102325
GO:0000911	biological_process	cytokinesis by cell plate formation	3	0.0103442
GO:0055072	biological_process	iron ion homeostasis	3	0.0103442
GO:0005847	cellular_component	mRNA cleavage and polyadenylation specificity factor complex	2	0.0110407
GO:0004712	molecular_function	protein serine/threonine/tyrosine kinase activity	5	0.0116418
GO:0006325	biological_process	chromatin organization	2	0.0118761
GO:0071465	biological_process	cellular response to desiccation	1	0.0122138
GO:0019918	biological_process	peptidyl-arginine methylation, to symmetrical-dimethyl arginine	1	0.0122138
GO:0004810	molecular_function	tRNA adenylyltransferase activity	1	0.0122138
GO:0012510	cellular_component	trans-Golgi network transport vesicle membrane	1	0.0122138
GO:0005736	cellular_component	DNA-directed RNA polymerase I complex	3	0.0123728
GO:0009411	biological_process	response to UV	3	0.0123728
GO:0001054	molecular_function	RNA polymerase I activity	3	0.0123728
GO:0008180	cellular_component	COP9 signalosome	2	0.0127383
GO:0010388	biological_process	cullin deneddylation	2	0.0127383
GO:0000166	molecular_function	nucleotide binding	15	0.013124
GO:0042372	biological_process	phylloquinone biosynthetic process	2	0.0136269
GO:0002239	biological_process	response to oomycetes	2	0.0136269
GO:0042631	biological_process	cellular response to water deprivation	2	0.0136269
GO:0010182	biological_process	sugar mediated signaling pathway	4	0.0136635
GO:0005096	molecular_function	GTPase activator activity	5	0.0141263
GO:0031624	molecular_function	ubiquitin conjugating enzyme binding	3	0.0141481
GO:0048831	biological_process	regulation of shoot system development	2	0.0145417
GO:0005665	cellular_component	DNA-directed RNA polymerase II, core complex	3	0.0146133
GO:0042128	biological_process	nitrate assimilation	4	0.0176552
GO:1901872	biological_process	ecgonone methyl ester biosynthetic process	1	0.0182648
GO:1901868	biological_process	ecgonine methyl ester catabolic process	1	0.0182648
GO:1901871	biological_process	ecgonone methyl ester catabolic process	1	0.0182648
GO:1901869	biological_process	ecgonine methyl ester biosynthetic process	1	0.0182648
GO:0009508	cellular_component	plastid chromosome	2	0.0184552
GO:0009846	biological_process	pollen germination	3	0.0191881
GO:0009570	cellular_component	chloroplast stroma	15	0.0209752
GO:0032436	biological_process	positive regulation of proteasomal ubiquitin-dependent protein catabolic process	3	0.0226281
GO:0010207	biological_process	photosystem II assembly	2	0.0227591
GO:0071446	biological_process	cellular response to salicylic acid stimulus	2	0.0227591
GO:0006405	biological_process	RNA export from nucleus	2	0.0238936
GO:0072711	biological_process	cellular response to hydroxyurea	1	0.0242788
GO:0070603	cellular_component	SWI/SNF superfamily-type complex	1	0.0242788
GO:0070087	molecular_function	chromo shadow domain binding	1	0.0242788
GO:0005721	cellular_component	pericentric heterochromatin	1	0.0242788
GO:0030330	biological_process	DNA damage response, signal transduction by p53 class mediator	1	0.0242788
GO:0015616	molecular_function	DNA translocase activity	1	0.0242788
GO:0070198	biological_process	protein localization to chromosome, telomeric region	1	0.0242788
GO:0035128	biological_process	post-embryonic forelimb morphogenesis	1	0.0242788
GO:0060009	biological_process	Sertoli cell development	1	0.0242788
GO:0031933	cellular_component	telomeric heterochromatin	1	0.0242788
GO:0032206	biological_process	positive regulation of telomere maintenance	1	0.0242788
GO:1900424	biological_process	regulation of defense response to bacterium	1	0.0242788
GO:0072520	biological_process	seminiferous tubule development	1	0.0242788
GO:0035264	biological_process	multicellular organism growth	1	0.0242788
GO:0016730	molecular_function	oxidoreductase activity, acting on iron-sulfur proteins as donors	1	0.0242788
GO:1901581	biological_process	negative regulation of telomeric RNA transcription from RNA pol II promoter	1	0.0242788
GO:0009556	biological_process	microsporogenesis	3	0.0244655
GO:0042651	cellular_component	thylakoid membrane	2	0.0250508
GO:0005487	molecular_function	nucleocytoplasmic transporter activity	2	0.0262305
GO:0008266	molecular_function	poly(U) RNA binding	2	0.0274322
GO:0008270	molecular_function	zinc ion binding	28	0.0286333
GO:0016985	molecular_function	mannan endo-1,4-beta-mannosidase activity	2	0.0286558
GO:0046355	biological_process	mannan catabolic process	2	0.0286558
GO:0046777	biological_process	protein autophosphorylation	6	0.0290037
GO:0005778	cellular_component	peroxisomal membrane	3	0.0290566
GO:0002230	biological_process	positive regulation of defense response to virus by host	2	0.0299009
GO:0000906	molecular_function	6,7-dimethyl-8-ribityllumazine synthase activity	1	0.0302561
GO:2000306	biological_process	positive regulation of photomorphogenesis	1	0.0302561
GO:1903508	biological_process	positive regulation of nucleic acid-templated transcription	1	0.0302561
GO:0010571	biological_process	positive regulation of nuclear cell cycle DNA replication	1	0.0361968
GO:0030029	biological_process	actin filament-based process	1	0.0361968
GO:0016032	biological_process	viral process	3	0.0363475
GO:0000151	cellular_component	ubiquitin ligase complex	3	0.0387008
GO:0016208	molecular_function	AMP binding	2	0.0391925
GO:0007165	biological_process	signal transduction	9	0.0404591
GO:0000387	biological_process	spliceosomal snRNP assembly	2	0.0405986
GO:0009535	cellular_component	chloroplast thylakoid membrane	10	0.0419376
GO:0001056	molecular_function	RNA polymerase III activity	3	0.0419563
GO:0005666	cellular_component	DNA-directed RNA polymerase III complex	3	0.0419563
GO:0015450	molecular_function	P-P-bond-hydrolysis-driven protein transmembrane transporter activity	2	0.0420236
GO:0080163	biological_process	regulation of protein serine/threonine phosphatase activity	2	0.0420236
GO:0004420	molecular_function	hydroxymethylglutaryl-CoA reductase (NADPH) activity	1	0.0421012
GO:0031124	biological_process	mRNA 3'-end processing	1	0.0421012
GO:0043065	biological_process	positive regulation of apoptotic process	1	0.0421012
GO:0046901	biological_process	tetrahydrofolylpolyglutamate biosynthetic process	1	0.0421012
GO:0000165	biological_process	MAPK cascade	1	0.0421012
GO:0010155	biological_process	regulation of proton transport	1	0.0421012
GO:0019915	biological_process	lipid storage	2	0.0449289
GO:0000271	biological_process	polysaccharide biosynthetic process	2	0.0479061
GO:0007283	biological_process	spermatogenesis	1	0.0479695
GO:0034052	biological_process	positive regulation of plant-type hypersensitive response	1	0.0479695
GO:0010427	molecular_function	abscisic acid binding	2	0.0494209
