# Supplementary material for: Small RNA and Degradome Sequencing Reveal Important MicroRNA Function in Nicotiana tabacum Response to Bemisia tabaci
Source: MDPI journal article supplement (doi:10.3390/genes13020361), 2022-02-17
Supplement: s1 [file Supplementary Table S4_20220216.xlsx]

## Sheet: upregulated miRNAs
Table S4. The annotation of genes targeted by upregulated miRNAs.
miRNA ID	Transcript ID	Gene ID	Symbol	Gene Annotation	Range	Score	GO	KEGG
PC-5p-244240_18	XM_016648411.1	XM_016648411.1	UPL4	E3 ubiquitin-protein ligase UPL4	729-752	1.5	GO:0004842(ubiquitin-protein transferase activity);GO:0005634(nucleus);GO:0005737(cytoplasm);GO:0042787(protein ubiquitination involved in ubiquitin-dependent protein catabolic process)	ko04120(Ubiquitin mediated proteolysis)
PC-5p-244240_18	XM_016650192.1	XM_016650192.1	-	-	176-198	2.5	GO:0005634(nucleus);GO:0008150(biological_process);GO:0008483(transaminase activity)
PC-5p-244240_18	XM_016650196.1	XM_016650196.1	-	-	172-194	2.5	GO:0005634(nucleus);GO:0008150(biological_process);GO:0008483(transaminase activity)
PC-5p-244240_18	XM_016590134.1	XM_016590134.1	-	transcription factor HBP-1b(c1)-like	1180-1203	2.2	GO:0005634(nucleus);GO:0006351(transcription, DNA-templated);GO:0043565(sequence-specific DNA binding)	ko04075(Plant hormone signal transduction)
fve-MIR3627b-p5_2ss7AT22AT	XM_016594938.1	XM_016594938.1	-	-	1083-1103	2.5	GO:0003682(chromatin binding);GO:0003700(transcription factor activity, sequence-specific DNA binding);GO:0003713(transcription coactivator activity);GO:0004402(histone acetyltransferase activity);GO:0005634(nucleus);GO:0006338(chromatin remodeling);GO:0006357(regulation of transcription from RNA polymerase II promoter);GO:0035066(positive regulation of histone acetylation)
gma-MIR171g-p3	XM_016618767.1	XM_016618767.1	-	-	431-450	2.5	GO:0008150(biological_process);GO:0009507(chloroplast)
gma-MIR171g-p3	XM_016577663.1	XM_016577663.1	SCL15	DELLA protein GAI1-like	879-899	1.2	GO:0003700(transcription factor activity, sequence-specific DNA binding);GO:0005634(nucleus);GO:0006355(regulation of transcription, DNA-templated);GO:0030154(cell differentiation);GO:0043565(sequence-specific DNA binding);GO:0048831(regulation of shoot system development)	ko04075(Plant hormone signal transduction)
gma-MIR171g-p3	XM_016625781.1	XM_016625781.1	SCL6	DELLA protein GAI-like	1707-1727	1.8	GO:0003700(transcription factor activity, sequence-specific DNA binding);GO:0005634(nucleus);GO:0006355(regulation of transcription, DNA-templated);GO:0010492(maintenance of shoot apical meristem identity);GO:0043565(sequence-specific DNA binding);GO:0048768(root hair cell tip growth);GO:0051301(cell division)	ko04075(Plant hormone signal transduction)
gma-MIR171g-p3	XM_016625782.1	XM_016625782.1	SCL6	DELLA protein GAI-like	1697-1717	1.8	GO:0003700(transcription factor activity, sequence-specific DNA binding);GO:0005634(nucleus);GO:0006355(regulation of transcription, DNA-templated);GO:0010492(maintenance of shoot apical meristem identity);GO:0043565(sequence-specific DNA binding);GO:0048768(root hair cell tip growth);GO:0051301(cell division)	ko04075(Plant hormone signal transduction)
gma-MIR171g-p3	XM_016588934.1	XM_016588934.1	SCL15	hypothetical protein	892-912	1.2	GO:0003700(transcription factor activity, sequence-specific DNA binding);GO:0005634(nucleus);GO:0006355(regulation of transcription, DNA-templated);GO:0030154(cell differentiation);GO:0043565(sequence-specific DNA binding);GO:0048831(regulation of shoot system development)	ko04075(Plant hormone signal transduction)
gma-MIR171g-p3	XM_016582020.1	XM_016582020.1	SCL6	DELLA protein RGL2	1384-1404	1	GO:0003700(transcription factor activity, sequence-specific DNA binding);GO:0005634(nucleus);GO:0006355(regulation of transcription, DNA-templated);GO:0030154(cell differentiation);GO:0043565(sequence-specific DNA binding)	ko04075(Plant hormone signal transduction)
gma-MIR171g-p3	XM_016582022.1	XM_016582022.1	SCL6	DELLA protein RGL2	1300-1320	1	GO:0003700(transcription factor activity, sequence-specific DNA binding);GO:0005634(nucleus);GO:0006355(regulation of transcription, DNA-templated);GO:0030154(cell differentiation);GO:0043565(sequence-specific DNA binding)	ko04075(Plant hormone signal transduction)
gma-MIR171g-p3	XM_016582024.1	XM_016582024.1	SCL6	DELLA protein RGL2	1055-1075	1	GO:0003700(transcription factor activity, sequence-specific DNA binding);GO:0005634(nucleus);GO:0006355(regulation of transcription, DNA-templated);GO:0030154(cell differentiation);GO:0043565(sequence-specific DNA binding)	ko04075(Plant hormone signal transduction)
gma-MIR171g-p3	XM_016582023.1	XM_016582023.1	SCL6	DELLA protein RGL2	1223-1243	1	GO:0003700(transcription factor activity, sequence-specific DNA binding);GO:0005634(nucleus);GO:0006355(regulation of transcription, DNA-templated);GO:0030154(cell differentiation);GO:0043565(sequence-specific DNA binding)	ko04075(Plant hormone signal transduction)
gma-MIR171g-p3	XM_016582267.1	XM_016582267.1	ABCC10	ABC transporter C family member 10-like	4034-4053	2.5	GO:0005524(ATP binding);GO:0005774(vacuolar membrane);GO:0005886(plasma membrane);GO:0008559(xenobiotic-transporting ATPase activity);GO:0016021(integral component of membrane);GO:0042626(ATPase activity, coupled to transmembrane movement of substances)	ko02010(ABC transporters)
gma-MIR171g-p3	XM_016582268.1	XM_016582268.1	ABCC10	ABC transporter C family member 10-like	4026-4045	2.5	GO:0005524(ATP binding);GO:0005774(vacuolar membrane);GO:0005886(plasma membrane);GO:0008559(xenobiotic-transporting ATPase activity);GO:0016021(integral component of membrane);GO:0042626(ATPase activity, coupled to transmembrane movement of substances)	ko02010(ABC transporters)
gma-MIR171g-p3	XM_016584434.1	XM_016584434.1	NSP2	hypothetical protein	729-749	2.2	GO:0003700(transcription factor activity, sequence-specific DNA binding);GO:0005634(nucleus);GO:0006355(regulation of transcription, DNA-templated);GO:0043565(sequence-specific DNA binding)	ko04075(Plant hormone signal transduction)
gma-MIR171g-p3	XM_016631827.1	XM_016631827.1	SCL6	DELLA protein RGL2	1373-1393	1	GO:0003700(transcription factor activity, sequence-specific DNA binding);GO:0005634(nucleus);GO:0006355(regulation of transcription, DNA-templated);GO:0030154(cell differentiation);GO:0043565(sequence-specific DNA binding)	ko04075(Plant hormone signal transduction)
gma-MIR171g-p3	XM_016631828.1	XM_016631828.1	SCL6	DELLA protein RGL2	1223-1243	1	GO:0003700(transcription factor activity, sequence-specific DNA binding);GO:0005634(nucleus);GO:0006355(regulation of transcription, DNA-templated);GO:0030154(cell differentiation);GO:0043565(sequence-specific DNA binding)	ko04075(Plant hormone signal transduction)
gma-MIR171g-p3	XM_016642100.1	XM_016642100.1	-	-	1038-1058	2	-
gma-MIR171g-p3	XM_016635528.1	XM_016635528.1	SCL6	hypothetical protein	1683-1703	1.8	GO:0003700(transcription factor activity, sequence-specific DNA binding);GO:0005634(nucleus);GO:0006355(regulation of transcription, DNA-templated);GO:0010492(maintenance of shoot apical meristem identity);GO:0043565(sequence-specific DNA binding);GO:0048768(root hair cell tip growth);GO:0051301(cell division)	ko04075(Plant hormone signal transduction)
gma-MIR171g-p3	XM_016635712.1	XM_016635712.1	ABCC10	ABC transporter C family member 10-like	4070-4089	2.5	GO:0005524(ATP binding);GO:0005774(vacuolar membrane);GO:0005886(plasma membrane);GO:0008559(xenobiotic-transporting ATPase activity);GO:0016021(integral component of membrane);GO:0042626(ATPase activity, coupled to transmembrane movement of substances)	ko02010(ABC transporters)
gma-MIR171g-p3	XM_016635713.1	XM_016635713.1	ABCC10	ABC transporter C family member 10-like	4079-4098	2.5	GO:0005524(ATP binding);GO:0005774(vacuolar membrane);GO:0005886(plasma membrane);GO:0008559(xenobiotic-transporting ATPase activity);GO:0016021(integral component of membrane);GO:0042626(ATPase activity, coupled to transmembrane movement of substances)	ko02010(ABC transporters)
PC-3p-61258_95	XM_016650960.1	XM_016650960.1	sdr42e1	3beta-hydroxysteroid-dehydrogenase/decarboxylase isoform 1	123-143	2.5	GO:0003854(3-beta-hydroxy-delta5-steroid dehydrogenase activity);GO:0005783(endoplasmic reticulum);GO:0006694(steroid biosynthetic process);GO:0016021(integral component of membrane);GO:0055114(oxidation-reduction process)	ko00100(Steroid biosynthesis)
PC-3p-61258_95	XM_016615793.1	XM_016615793.1	SWI3D	-	1173-1192	2.5	GO:0003677(DNA binding);GO:0005515(protein binding);GO:0005634(nucleus);GO:0006338(chromatin remodeling);GO:0006351(transcription, DNA-templated);GO:0006355(regulation of transcription, DNA-templated);GO:0007275(multicellular organism development);GO:0016514(SWI/SNF complex)
PC-3p-61258_95	XM_016656248.1	XM_016656248.1	SWI3D	-	1229-1248	2.5	GO:0003677(DNA binding);GO:0005515(protein binding);GO:0005634(nucleus);GO:0006338(chromatin remodeling);GO:0006351(transcription, DNA-templated);GO:0006355(regulation of transcription, DNA-templated);GO:0007275(multicellular organism development);GO:0016514(SWI/SNF complex)
PC-3p-130469_42	XM_016600088.1	XM_016600088.1	TFCE	-	1755-1777	2	GO:0000911(cytokinesis by cell plate formation);GO:0007021(tubulin complex assembly);GO:0009507(chloroplast);GO:0009793(embryo development ending in seed dormancy)
PC-3p-130469_42	XM_016600091.1	XM_016600091.1	TFCE	-	1654-1676	2	GO:0000911(cytokinesis by cell plate formation);GO:0007021(tubulin complex assembly);GO:0009507(chloroplast);GO:0009793(embryo development ending in seed dormancy)
PC-3p-130469_42	XM_016600090.1	XM_016600090.1	TFCE	-	1663-1685	2	GO:0000911(cytokinesis by cell plate formation);GO:0007021(tubulin complex assembly);GO:0009507(chloroplast);GO:0009793(embryo development ending in seed dormancy)
PC-3p-130469_42	XM_016631922.1	XM_016631922.1	-	uncharacterized LOC104808371	3-26	2.2	-	ko00040(Pentose and glucuronate interconversions);ko00052(Galactose metabolism);ko00053(Ascorbate and aldarate metabolism);ko00520(Amino sugar and nucleotide sugar metabolism)
nta-MIR6151g-p3	XM_016642979.1	XM_016642979.1	CAPH2	-	1768-1788	2	GO:0000793(condensed chromosome);GO:0005634(nucleus);GO:0005730(nucleolus);GO:0030261(chromosome condensation);GO:0045739(positive regulation of DNA repair);GO:2001022(positive regulation of response to DNA damage stimulus)
nta-MIR6151g-p3	XM_016615332.1	XM_016615332.1	CAPH2	-	1728-1748	2.5	GO:0000793(condensed chromosome);GO:0005634(nucleus);GO:0005730(nucleolus);GO:0030261(chromosome condensation);GO:0045739(positive regulation of DNA repair);GO:2001022(positive regulation of response to DNA damage stimulus)
nta-MIR6151g-p3	XM_016586021.1	XM_016586021.1	LECRKS6	BRASSINOSTEROID INSENSITIVE 1-associated receptor kinase 1-like	1799-1819	2	GO:0004674(protein serine/threonine kinase activity);GO:0005524(ATP binding);GO:0005886(plasma membrane);GO:0006468(protein phosphorylation);GO:0016021(integral component of membrane);GO:0016301(kinase activity);GO:0030246(carbohydrate binding)	ko04075(Plant hormone signal transduction);ko04626(Plant-pathogen interaction)
nta-MIR6151g-p3	XM_016603192.1	XM_016603192.1	CAPH2	-	1786-1806	2	GO:0000793(condensed chromosome);GO:0005634(nucleus);GO:0005730(nucleolus);GO:0030261(chromosome condensation);GO:0045739(positive regulation of DNA repair);GO:2001022(positive regulation of response to DNA damage stimulus)
nta-MIR6151g-p3	XM_016644610.1	XM_016644610.1	AGD6	uncharacterized LOC102577536	929-949	2.5	GO:0003677(DNA binding);GO:0005096(GTPase activator activity);GO:0005634(nucleus);GO:0005829(cytosol);GO:0046872(metal ion binding)	ko04144(Endocytosis)
nta-MIR6151h-p3	XM_016642979.1	XM_016642979.1	CAPH2	-	1768-1788	2	GO:0000793(condensed chromosome);GO:0005634(nucleus);GO:0005730(nucleolus);GO:0030261(chromosome condensation);GO:0045739(positive regulation of DNA repair);GO:2001022(positive regulation of response to DNA damage stimulus)
nta-MIR6151h-p3	XM_016615332.1	XM_016615332.1	CAPH2	-	1728-1748	2.5	GO:0000793(condensed chromosome);GO:0005634(nucleus);GO:0005730(nucleolus);GO:0030261(chromosome condensation);GO:0045739(positive regulation of DNA repair);GO:2001022(positive regulation of response to DNA damage stimulus)
nta-MIR6151h-p3	XM_016586021.1	XM_016586021.1	LECRKS6	BRASSINOSTEROID INSENSITIVE 1-associated receptor kinase 1-like	1799-1819	2	GO:0004674(protein serine/threonine kinase activity);GO:0005524(ATP binding);GO:0005886(plasma membrane);GO:0006468(protein phosphorylation);GO:0016021(integral component of membrane);GO:0016301(kinase activity);GO:0030246(carbohydrate binding)	ko04075(Plant hormone signal transduction);ko04626(Plant-pathogen interaction)
nta-MIR6151h-p3	XM_016603192.1	XM_016603192.1	CAPH2	-	1786-1806	2	GO:0000793(condensed chromosome);GO:0005634(nucleus);GO:0005730(nucleolus);GO:0030261(chromosome condensation);GO:0045739(positive regulation of DNA repair);GO:2001022(positive regulation of response to DNA damage stimulus)
nta-MIR6151h-p3	XM_016644610.1	XM_016644610.1	AGD6	uncharacterized LOC102577536	929-949	2.5	GO:0003677(DNA binding);GO:0005096(GTPase activator activity);GO:0005634(nucleus);GO:0005829(cytosol);GO:0046872(metal ion binding)	ko04144(Endocytosis)
nta-MIR6151e-p3	XM_016642979.1	XM_016642979.1	CAPH2	-	1768-1788	2	GO:0000793(condensed chromosome);GO:0005634(nucleus);GO:0005730(nucleolus);GO:0030261(chromosome condensation);GO:0045739(positive regulation of DNA repair);GO:2001022(positive regulation of response to DNA damage stimulus)
nta-MIR6151e-p3	XM_016615332.1	XM_016615332.1	CAPH2	-	1728-1748	2.5	GO:0000793(condensed chromosome);GO:0005634(nucleus);GO:0005730(nucleolus);GO:0030261(chromosome condensation);GO:0045739(positive regulation of DNA repair);GO:2001022(positive regulation of response to DNA damage stimulus)
nta-MIR6151e-p3	XM_016586021.1	XM_016586021.1	LECRKS6	BRASSINOSTEROID INSENSITIVE 1-associated receptor kinase 1-like	1799-1819	2	GO:0004674(protein serine/threonine kinase activity);GO:0005524(ATP binding);GO:0005886(plasma membrane);GO:0006468(protein phosphorylation);GO:0016021(integral component of membrane);GO:0016301(kinase activity);GO:0030246(carbohydrate binding)	ko04075(Plant hormone signal transduction);ko04626(Plant-pathogen interaction)
nta-MIR6151e-p3	XM_016603192.1	XM_016603192.1	CAPH2	-	1786-1806	2	GO:0000793(condensed chromosome);GO:0005634(nucleus);GO:0005730(nucleolus);GO:0030261(chromosome condensation);GO:0045739(positive regulation of DNA repair);GO:2001022(positive regulation of response to DNA damage stimulus)
nta-MIR6151e-p3	XM_016644610.1	XM_016644610.1	AGD6	uncharacterized LOC102577536	929-949	2.5	GO:0003677(DNA binding);GO:0005096(GTPase activator activity);GO:0005634(nucleus);GO:0005829(cytosol);GO:0046872(metal ion binding)	ko04144(Endocytosis)
nta-MIR6151f-p3	XM_016642979.1	XM_016642979.1	CAPH2	-	1768-1788	2	GO:0000793(condensed chromosome);GO:0005634(nucleus);GO:0005730(nucleolus);GO:0030261(chromosome condensation);GO:0045739(positive regulation of DNA repair);GO:2001022(positive regulation of response to DNA damage stimulus)
nta-MIR6151f-p3	XM_016615332.1	XM_016615332.1	CAPH2	-	1728-1748	2.5	GO:0000793(condensed chromosome);GO:0005634(nucleus);GO:0005730(nucleolus);GO:0030261(chromosome condensation);GO:0045739(positive regulation of DNA repair);GO:2001022(positive regulation of response to DNA damage stimulus)
nta-MIR6151f-p3	XM_016586021.1	XM_016586021.1	LECRKS6	BRASSINOSTEROID INSENSITIVE 1-associated receptor kinase 1-like	1799-1819	2	GO:0004674(protein serine/threonine kinase activity);GO:0005524(ATP binding);GO:0005886(plasma membrane);GO:0006468(protein phosphorylation);GO:0016021(integral component of membrane);GO:0016301(kinase activity);GO:0030246(carbohydrate binding)	ko04075(Plant hormone signal transduction);ko04626(Plant-pathogen interaction)
nta-MIR6151f-p3	XM_016603192.1	XM_016603192.1	CAPH2	-	1786-1806	2	GO:0000793(condensed chromosome);GO:0005634(nucleus);GO:0005730(nucleolus);GO:0030261(chromosome condensation);GO:0045739(positive regulation of DNA repair);GO:2001022(positive regulation of response to DNA damage stimulus)
nta-MIR6151f-p3	XM_016644610.1	XM_016644610.1	AGD6	uncharacterized LOC102577536	929-949	2.5	GO:0003677(DNA binding);GO:0005096(GTPase activator activity);GO:0005634(nucleus);GO:0005829(cytosol);GO:0046872(metal ion binding)	ko04144(Endocytosis)
nta-MIR6151i-p3	XM_016642979.1	XM_016642979.1	CAPH2	-	1768-1788	2	GO:0000793(condensed chromosome);GO:0005634(nucleus);GO:0005730(nucleolus);GO:0030261(chromosome condensation);GO:0045739(positive regulation of DNA repair);GO:2001022(positive regulation of response to DNA damage stimulus)
nta-MIR6151i-p3	XM_016615332.1	XM_016615332.1	CAPH2	-	1728-1748	2.5	GO:0000793(condensed chromosome);GO:0005634(nucleus);GO:0005730(nucleolus);GO:0030261(chromosome condensation);GO:0045739(positive regulation of DNA repair);GO:2001022(positive regulation of response to DNA damage stimulus)
nta-MIR6151i-p3	XM_016586021.1	XM_016586021.1	LECRKS6	BRASSINOSTEROID INSENSITIVE 1-associated receptor kinase 1-like	1799-1819	2	GO:0004674(protein serine/threonine kinase activity);GO:0005524(ATP binding);GO:0005886(plasma membrane);GO:0006468(protein phosphorylation);GO:0016021(integral component of membrane);GO:0016301(kinase activity);GO:0030246(carbohydrate binding)	ko04075(Plant hormone signal transduction);ko04626(Plant-pathogen interaction)
nta-MIR6151i-p3	XM_016603192.1	XM_016603192.1	CAPH2	-	1786-1806	2	GO:0000793(condensed chromosome);GO:0005634(nucleus);GO:0005730(nucleolus);GO:0030261(chromosome condensation);GO:0045739(positive regulation of DNA repair);GO:2001022(positive regulation of response to DNA damage stimulus)
nta-MIR6151i-p3	XM_016644610.1	XM_016644610.1	AGD6	uncharacterized LOC102577536	929-949	2.5	GO:0003677(DNA binding);GO:0005096(GTPase activator activity);GO:0005634(nucleus);GO:0005829(cytosol);GO:0046872(metal ion binding)	ko04144(Endocytosis)
nta-MIR6151d-p3	XM_016642979.1	XM_016642979.1	CAPH2	-	1768-1788	2	GO:0000793(condensed chromosome);GO:0005634(nucleus);GO:0005730(nucleolus);GO:0030261(chromosome condensation);GO:0045739(positive regulation of DNA repair);GO:2001022(positive regulation of response to DNA damage stimulus)
nta-MIR6151d-p3	XM_016615332.1	XM_016615332.1	CAPH2	-	1728-1748	2.5	GO:0000793(condensed chromosome);GO:0005634(nucleus);GO:0005730(nucleolus);GO:0030261(chromosome condensation);GO:0045739(positive regulation of DNA repair);GO:2001022(positive regulation of response to DNA damage stimulus)
nta-MIR6151d-p3	XM_016586021.1	XM_016586021.1	LECRKS6	BRASSINOSTEROID INSENSITIVE 1-associated receptor kinase 1-like	1799-1819	2	GO:0004674(protein serine/threonine kinase activity);GO:0005524(ATP binding);GO:0005886(plasma membrane);GO:0006468(protein phosphorylation);GO:0016021(integral component of membrane);GO:0016301(kinase activity);GO:0030246(carbohydrate binding)	ko04075(Plant hormone signal transduction);ko04626(Plant-pathogen interaction)
nta-MIR6151d-p3	XM_016603192.1	XM_016603192.1	CAPH2	-	1786-1806	2	GO:0000793(condensed chromosome);GO:0005634(nucleus);GO:0005730(nucleolus);GO:0030261(chromosome condensation);GO:0045739(positive regulation of DNA repair);GO:2001022(positive regulation of response to DNA damage stimulus)
nta-MIR6151d-p3	XM_016644610.1	XM_016644610.1	AGD6	uncharacterized LOC102577536	929-949	2.5	GO:0003677(DNA binding);GO:0005096(GTPase activator activity);GO:0005634(nucleus);GO:0005829(cytosol);GO:0046872(metal ion binding)	ko04144(Endocytosis)
nta-miR6159	XM_016625753.1	XM_016625753.1	-	-	836-858	2.5	GO:0003674(molecular_function);GO:0005634(nucleus);GO:0048467(gynoecium development);GO:0071365(cellular response to auxin stimulus)
nta-miR6159	XM_016596282.1	XM_016596282.1	pol	uncharacterized LOC103427975	2927-2947	2.5	GO:0071011(precatalytic spliceosome)	ko03040(Spliceosome)
nta-miR6159	XM_016603330.1				918-938	2.5	-
nta-miR6159	XM_016635778.1	XM_016635778.1	-	armadillo repeat-containing protein 3	190-210	2.5	GO:0005634(nucleus);GO:0005737(cytoplasm)	ko04140(Regulation of autophagy)
PC-3p-202629_23	XM_016609915.1	XM_016609915.1	CSN1	26S proteasome subunit RPN7	1401-1423	2.5	GO:0008180(COP9 signalosome);GO:0010388(cullin deneddylation)	ko04141(Protein processing in endoplasmic reticulum)
PC-5p-194313_25	XM_016625967.1	XM_016625967.1	-	-	2253-2276	2	GO:0003674(molecular_function);GO:0005773(vacuole);GO:0008150(biological_process);GO:0009507(chloroplast);GO:0016021(integral component of membrane)
PC-5p-194313_25	XM_016625950.1	XM_016625950.1	-	-	2531-2554	2	GO:0003674(molecular_function);GO:0005773(vacuole);GO:0008150(biological_process);GO:0009507(chloroplast);GO:0016021(integral component of membrane)
PC-5p-194313_25	XM_016625959.1	XM_016625959.1	-	-	2859-2882	2	GO:0003674(molecular_function);GO:0005773(vacuole);GO:0008150(biological_process);GO:0009507(chloroplast);GO:0016021(integral component of membrane)
PC-5p-194313_25	XM_016625954.1	XM_016625954.1	-	-	2866-2889	2	GO:0003674(molecular_function);GO:0005773(vacuole);GO:0008150(biological_process);GO:0009507(chloroplast);GO:0016021(integral component of membrane)
PC-5p-194313_25	XM_016615711.1	XM_016615711.1	SAUR50	auxin-induced protein 15A-like	731-754	2	GO:0003674(molecular_function);GO:0005575(cellular_component);GO:0009733(response to auxin)	ko04075(Plant hormone signal transduction)
PC-5p-194313_25	XM_016632476.1	XM_016632476.1	TAF15B	-	3194-3217	2.2	GO:0000166(nucleotide binding);GO:0003723(RNA binding);GO:0005634(nucleus);GO:0006351(transcription, DNA-templated);GO:0006355(regulation of transcription, DNA-templated);GO:0008270(zinc ion binding);GO:0009507(chloroplast)
PC-5p-194313_25	XM_016642027.1	XM_016642027.1	-	-	3432-3454	1.5	GO:0005886(plasma membrane);GO:0006952(defense response);GO:0007165(signal transduction);GO:0016301(kinase activity)
PC-5p-194313_25	XM_016636977.1	XM_016636977.1	CALS12	hypothetical protein	5599-5621	2.5	GO:0000148(1,3-beta-D-glucan synthase complex);GO:0003843(1,3-beta-D-glucan synthase activity);GO:0005886(plasma membrane)	ko00500(Starch and sucrose metabolism)
nta-miR6025b	XM_016626382.1	XM_016626382.1	R1B-12	putative late blight resistance protein homolog R1A-10	2924-2945	2.5	GO:0005524(ATP binding);GO:0005886(plasma membrane);GO:0006952(defense response);GO:0043531(ADP binding)	ko04626(Plant-pathogen interaction)
nta-miR6025b	XM_016596911.1	XM_016596911.1	R1B-16	putative late blight resistance protein homolog R1B-16	3333-3354	2.5	GO:0005524(ATP binding);GO:0005575(cellular_component);GO:0006952(defense response);GO:0043531(ADP binding)	ko04626(Plant-pathogen interaction)
nta-miR6025b	XM_016596911.1	XM_016596911.1	R1B-16	putative late blight resistance protein homolog R1B-16	2517-2538	2.5	GO:0005524(ATP binding);GO:0005575(cellular_component);GO:0006952(defense response);GO:0043531(ADP binding)	ko04626(Plant-pathogen interaction)
nta-miR6025b	XM_016596911.1	XM_016596911.1	R1B-16	putative late blight resistance protein homolog R1B-16	1740-1761	2.5	GO:0005524(ATP binding);GO:0005575(cellular_component);GO:0006952(defense response);GO:0043531(ADP binding)	ko04626(Plant-pathogen interaction)
nta-miR6025b	XM_016597838.1	XM_016597838.1	R1B-16	putative late blight resistance protein homolog R1A-10	1844-1865	2	GO:0005524(ATP binding);GO:0006952(defense response);GO:0043531(ADP binding)	ko04626(Plant-pathogen interaction)
nta-miR6025b	XM_016597837.1	XM_016597837.1	R1B-16	putative late blight resistance protein homolog R1A-10	1887-1908	2	GO:0005524(ATP binding);GO:0006952(defense response);GO:0043531(ADP binding)	ko04626(Plant-pathogen interaction)
nta-miR6025b	XM_016597839.1	XM_016597839.1	R1B-16	putative late blight resistance protein homolog R1A-10	1783-1804	2	GO:0005524(ATP binding);GO:0006952(defense response);GO:0043531(ADP binding)	ko04626(Plant-pathogen interaction)
nta-miR6025b	XM_016597835.1	XM_016597835.1	R1B-16	putative late blight resistance protein homolog R1A-10	3298-3319	2	GO:0005524(ATP binding);GO:0006952(defense response);GO:0043531(ADP binding)	ko04626(Plant-pathogen interaction)
nta-miR6025b	XM_016597834.1	XM_016597834.1	R1B-16	putative late blight resistance protein homolog R1A-10	3298-3319	2	GO:0005524(ATP binding);GO:0006952(defense response);GO:0043531(ADP binding)	ko04626(Plant-pathogen interaction)
nta-miR6025b	XM_016629060.1	XM_016629060.1	At4g03230	G-type lectin S-receptor-like serine/threonine-protein kinase CES101	1583-1604	2.5	GO:0004674(protein serine/threonine kinase activity);GO:0005886(plasma membrane);GO:0006468(protein phosphorylation);GO:0006952(defense response);GO:0009506(plasmodesma)	ko00520(Amino sugar and nucleotide sugar metabolism)
nta-miR6025b	XM_016630016.1	XM_016630016.1	SNOG_03055	hypothetical protein	1373-1394	2.5	GO:0000166(nucleotide binding);GO:0005737(cytoplasm);GO:0006974(cellular response to DNA damage stimulus);GO:0009414(response to water deprivation);GO:0009737(response to abscisic acid);GO:0080008(Cul4-RING E3 ubiquitin ligase complex)	ko04120(Ubiquitin mediated proteolysis);ko03420(Nucleotide excision repair)
nta-miR6025b	XM_016583934.1	XM_016583934.1	R1B-12	putative late blight resistance protein homolog R1B-14	3337-3358	2.5	GO:0005524(ATP binding);GO:0005886(plasma membrane);GO:0006952(defense response);GO:0043531(ADP binding)	ko04626(Plant-pathogen interaction)
nta-miR6025b	XM_016583933.1	XM_016583933.1	R1B-12	putative late blight resistance protein homolog R1B-14	3343-3364	2.5	GO:0005524(ATP binding);GO:0005886(plasma membrane);GO:0006952(defense response);GO:0043531(ADP binding)	ko04626(Plant-pathogen interaction)
nta-miR6025b	XM_016623651.1	XM_016623651.1	R1B-16	putative late blight resistance protein homolog R1A-10	3066-3087	2.5	GO:0005524(ATP binding);GO:0006952(defense response);GO:0043531(ADP binding)	ko04626(Plant-pathogen interaction)
nta-miR6025b	XM_016615417.1	XM_016615417.1	R1B-16	putative late blight resistance protein homolog R1B-14	2605-2626	2	GO:0005524(ATP binding);GO:0005575(cellular_component);GO:0006952(defense response);GO:0043531(ADP binding)	ko04626(Plant-pathogen interaction)
nta-miR6025b	XM_016615417.1	XM_016615417.1	R1B-16	putative late blight resistance protein homolog R1B-14	1828-1849	2.5	GO:0005524(ATP binding);GO:0005575(cellular_component);GO:0006952(defense response);GO:0043531(ADP binding)	ko04626(Plant-pathogen interaction)
nta-miR6025b	XM_016585004.1	XM_016585004.1	CES101	G-type lectin S-receptor-like serine/threonine-protein kinase CES101	2412-2433	2.5	GO:0004674(protein serine/threonine kinase activity);GO:0005886(plasma membrane);GO:0006468(protein phosphorylation);GO:0006952(defense response);GO:0009506(plasmodesma)	ko00520(Amino sugar and nucleotide sugar metabolism)
nta-miR6025b	XM_016638474.1	XM_016638474.1	R1A	putative late blight resistance protein homolog R1A-10	1285-1306	2.5	GO:0005524(ATP binding);GO:0005634(nucleus);GO:0005737(cytoplasm);GO:0005886(plasma membrane);GO:0006952(defense response);GO:0009626(plant-type hypersensitive response);GO:0009814(defense response, incompatible interaction);GO:0043531(ADP binding)	ko04626(Plant-pathogen interaction)
nta-miR6025b	XM_016585813.1	XM_016585813.1	R1B-16	putative late blight resistance protein homolog R1B-16	2040-2061	2.5	GO:0005524(ATP binding);GO:0005575(cellular_component);GO:0006952(defense response);GO:0043531(ADP binding)	ko04626(Plant-pathogen interaction)
nta-miR6025b	XM_016585814.1	XM_016585814.1	R1B-16	putative late blight resistance protein homolog R1B-16	2114-2135	2.5	GO:0005524(ATP binding);GO:0005575(cellular_component);GO:0006952(defense response);GO:0043531(ADP binding)	ko04626(Plant-pathogen interaction)
nta-miR6025b	XM_016586664.1	XM_016586664.1	R1A	putative late blight resistance protein homolog R1A-10	1869-1890	2.5	GO:0005524(ATP binding);GO:0005634(nucleus);GO:0005737(cytoplasm);GO:0005886(plasma membrane);GO:0006952(defense response);GO:0009626(plant-type hypersensitive response);GO:0009814(defense response, incompatible interaction);GO:0043531(ADP binding)	ko04626(Plant-pathogen interaction)
nta-miR6025b	XM_016633204.1	XM_016633204.1	R1B-12	putative late blight resistance protein homolog R1A-10	1228-1249	2	GO:0005524(ATP binding);GO:0005886(plasma membrane);GO:0006952(defense response);GO:0043531(ADP binding)	ko04626(Plant-pathogen interaction)
nta-miR6025b	XM_016655560.1	XM_016655560.1	PLDDELTA	phospholipase D delta	1458-1479	2.5	GO:0004630(phospholipase D activity);GO:0005509(calcium ion binding);GO:0005773(vacuole);GO:0005886(plasma membrane);GO:0009409(response to cold);GO:0009506(plasmodesma);GO:0009789(positive regulation of abscisic acid-activated signaling pathway);GO:0012501(programmed cell death);GO:0016020(membrane);GO:0016042(lipid catabolic process);GO:0046470(phosphatidylcholine metabolic process);GO:0046473(…	ko00564(Glycerophospholipid metabolism);ko00565(Ether lipid metabolism);ko04144(Endocytosis)
nta-miR6025b	XM_016587345.1	XM_016587345.1	R1A-4	putative late blight resistance protein homolog R1B-14	1813-1834	2.5	GO:0005524(ATP binding);GO:0006952(defense response);GO:0043531(ADP binding)	ko04626(Plant-pathogen interaction)
nta-miR6025b	XM_016587344.1	XM_016587344.1	R1B-17	putative late blight resistance protein homolog R1B-14	1811-1832	2.5	GO:0005524(ATP binding);GO:0006952(defense response);GO:0043531(ADP binding)	ko04626(Plant-pathogen interaction)
nta-miR6025b	XM_016587343.1	XM_016587343.1	R1B-17	putative late blight resistance protein homolog R1B-14	1811-1832	2.5	GO:0005524(ATP binding);GO:0006952(defense response);GO:0043531(ADP binding)	ko04626(Plant-pathogen interaction)
nta-miR6025b	XM_016603412.1	XM_016603412.1	R1B-12	putative late blight resistance protein homolog R1B-14	3589-3610	1	GO:0005524(ATP binding);GO:0006952(defense response);GO:0043531(ADP binding)	ko04626(Plant-pathogen interaction)
nta-miR6025b	XM_016618650.1	XM_016618650.1	wdr76	protein DAMAGED DNA-BINDING 2-like	1396-1417	2.5	GO:0000166(nucleotide binding);GO:0005737(cytoplasm);GO:0006974(cellular response to DNA damage stimulus);GO:0009414(response to water deprivation);GO:0009737(response to abscisic acid);GO:0080008(Cul4-RING E3 ubiquitin ligase complex)	ko04120(Ubiquitin mediated proteolysis);ko03420(Nucleotide excision repair)
nta-miR6025b	XM_016618694.1	XM_016618694.1	R1B-16	putative late blight resistance protein homolog R1B-14	3918-3939	1	GO:0005524(ATP binding);GO:0005575(cellular_component);GO:0006952(defense response);GO:0043531(ADP binding)	ko04626(Plant-pathogen interaction)
nta-miR6025b	XM_016657634.1	XM_016657634.1	R1B-23	putative late blight resistance protein homolog R1B-14	2136-2157	1.5	GO:0005524(ATP binding);GO:0005575(cellular_component);GO:0006952(defense response);GO:0043531(ADP binding)	ko04626(Plant-pathogen interaction)
nta-miR6025b	XM_016642579.1	XM_016642579.1	R1A-10	putative late blight resistance protein homolog R1B-14	1313-1334	2	GO:0005524(ATP binding);GO:0006952(defense response);GO:0043531(ADP binding)	ko04626(Plant-pathogen interaction)
nta-miR6025b	XM_016642575.1	XM_016642575.1	R1A-10	putative late blight resistance protein homolog R1B-14	1340-1361	2	GO:0005524(ATP binding);GO:0006952(defense response);GO:0043531(ADP binding)	ko04626(Plant-pathogen interaction)
nta-miR6025b	XM_016642577.1	XM_016642577.1	R1A-10	putative late blight resistance protein homolog R1B-14	1205-1226	2	GO:0005524(ATP binding);GO:0006952(defense response);GO:0043531(ADP binding)	ko04626(Plant-pathogen interaction)
nta-miR6025b	XM_016642580.1	XM_016642580.1	R1A-10	putative late blight resistance protein homolog R1B-14	1272-1293	2	GO:0005524(ATP binding);GO:0006952(defense response);GO:0043531(ADP binding)	ko04626(Plant-pathogen interaction)
nta-miR6025b	XM_016642574.1	XM_016642574.1	R1A-10	putative late blight resistance protein homolog R1B-14	1305-1326	2	GO:0005524(ATP binding);GO:0006952(defense response);GO:0043531(ADP binding)	ko04626(Plant-pathogen interaction)
nta-miR6025b	XM_016642576.1	XM_016642576.1	R1A-10	putative late blight resistance protein homolog R1B-14	1371-1392	2	GO:0005524(ATP binding);GO:0006952(defense response);GO:0043531(ADP binding)	ko04626(Plant-pathogen interaction)
nta-miR6025b	XM_016590368.1	XM_016590368.1	R1C-3	putative late blight resistance protein homolog R1B-14	1878-1899	2	GO:0005524(ATP binding);GO:0006952(defense response);GO:0043531(ADP binding)	ko04626(Plant-pathogen interaction)
nta-miR6025b	XM_016659427.1	XM_016659427.1	R1A	putative late blight resistance protein homolog R1A-10	1972-1993	2.5	GO:0005524(ATP binding);GO:0006952(defense response);GO:0043531(ADP binding)	ko04626(Plant-pathogen interaction)
nta-miR6025b	XM_016637225.1	XM_016637225.1	R1B-16	putative late blight resistance protein homolog R1B-14	3403-3424	2.2	GO:0000166(nucleotide binding);GO:0002230(positive regulation of defense response to virus by host);GO:0002239(response to oomycetes);GO:0005515(protein binding);GO:0005524(ATP binding);GO:0005886(plasma membrane);GO:0006952(defense response);GO:0009416(response to light stimulus);GO:0009611(response to wounding);GO:0009626(plant-type hypersensitive response);GO:0009637(response to blue light);GO…	ko04626(Plant-pathogen interaction)
nta-miR6025b	XM_016637224.1	XM_016637224.1	R1B-16	putative late blight resistance protein homolog R1B-14	3363-3384	2.2	GO:0000166(nucleotide binding);GO:0002230(positive regulation of defense response to virus by host);GO:0002239(response to oomycetes);GO:0005515(protein binding);GO:0005524(ATP binding);GO:0005886(plasma membrane);GO:0006952(defense response);GO:0009416(response to light stimulus);GO:0009611(response to wounding);GO:0009626(plant-type hypersensitive response);GO:0009637(response to blue light);GO…	ko04626(Plant-pathogen interaction)
nta-MIR6161c-p3_1ss7AG	XM_016600088.1	XM_016600088.1	TFCE	-	1754-1776	1	GO:0000911(cytokinesis by cell plate formation);GO:0007021(tubulin complex assembly);GO:0009507(chloroplast);GO:0009793(embryo development ending in seed dormancy)
nta-MIR6161c-p3_1ss7AG	XM_016600091.1	XM_016600091.1	TFCE	-	1653-1675	1	GO:0000911(cytokinesis by cell plate formation);GO:0007021(tubulin complex assembly);GO:0009507(chloroplast);GO:0009793(embryo development ending in seed dormancy)
nta-MIR6161c-p3_1ss7AG	XM_016600090.1	XM_016600090.1	TFCE	-	1662-1684	1	GO:0000911(cytokinesis by cell plate formation);GO:0007021(tubulin complex assembly);GO:0009507(chloroplast);GO:0009793(embryo development ending in seed dormancy)
nta-MIR6161c-p3_1ss7AG	XM_016631922.1	XM_016631922.1	-	uncharacterized LOC104808371	2-25	2	-	ko00040(Pentose and glucuronate interconversions);ko00052(Galactose metabolism);ko00053(Ascorbate and aldarate metabolism);ko00520(Amino sugar and nucleotide sugar metabolism)
bra-miR168a-5p_L+1	XM_016626246.1	XM_016626246.1	MSH5	DNA mismatch repair protein MSH3	2082-2103	2.5	GO:0000710(meiotic mismatch repair);GO:0000795(synaptonemal complex);GO:0003684(damaged DNA binding);GO:0006298(mismatch repair);GO:0030983(mismatched DNA binding);GO:0032300(mismatch repair complex);GO:0051026(chiasma assembly)	ko03430(Mismatch repair)
bra-miR168a-5p_L+1	XM_016626248.1	XM_016626248.1	MSH5	DNA mismatch repair protein MSH3	1666-1687	2.5	GO:0000710(meiotic mismatch repair);GO:0000795(synaptonemal complex);GO:0003684(damaged DNA binding);GO:0006298(mismatch repair);GO:0030983(mismatched DNA binding);GO:0032300(mismatch repair complex);GO:0051026(chiasma assembly)	ko03430(Mismatch repair)
bra-miR168a-5p_L+1	XM_016626243.1	XM_016626243.1	MSH5	DNA mismatch repair protein MSH3	1926-1947	2.5	GO:0000710(meiotic mismatch repair);GO:0000795(synaptonemal complex);GO:0003684(damaged DNA binding);GO:0006298(mismatch repair);GO:0030983(mismatched DNA binding);GO:0032300(mismatch repair complex);GO:0051026(chiasma assembly)	ko03430(Mismatch repair)
bra-miR168a-5p_L+1	XM_016626242.1	XM_016626242.1	MSH5	DNA mismatch repair protein MSH3	1972-1993	2.5	GO:0000710(meiotic mismatch repair);GO:0000795(synaptonemal complex);GO:0003684(damaged DNA binding);GO:0006298(mismatch repair);GO:0030983(mismatched DNA binding);GO:0032300(mismatch repair complex);GO:0051026(chiasma assembly)	ko03430(Mismatch repair)
bra-miR168a-5p_L+1	XM_016626239.1	XM_016626239.1	MSH5	DNA mismatch repair protein MSH3	2279-2300	2.5	GO:0000710(meiotic mismatch repair);GO:0000795(synaptonemal complex);GO:0003684(damaged DNA binding);GO:0006298(mismatch repair);GO:0030983(mismatched DNA binding);GO:0032300(mismatch repair complex);GO:0051026(chiasma assembly)	ko03430(Mismatch repair)
bra-miR168a-5p_L+1	XM_016626244.1	XM_016626244.1	MSH5	DNA mismatch repair protein MSH3	2197-2218	2.5	GO:0000710(meiotic mismatch repair);GO:0000795(synaptonemal complex);GO:0003684(damaged DNA binding);GO:0006298(mismatch repair);GO:0030983(mismatched DNA binding);GO:0032300(mismatch repair complex);GO:0051026(chiasma assembly)	ko03430(Mismatch repair)
bra-miR168a-5p_L+1	XM_016626241.1	XM_016626241.1	MSH5	mismatch repair protein	2254-2275	2.5	GO:0000710(meiotic mismatch repair);GO:0000795(synaptonemal complex);GO:0003684(damaged DNA binding);GO:0006298(mismatch repair);GO:0030983(mismatched DNA binding);GO:0032300(mismatch repair complex);GO:0051026(chiasma assembly)	ko03430(Mismatch repair)
bra-miR168a-5p_L+1	XM_016626237.1	XM_016626237.1	MSH5	DNA mismatch repair protein MSH3	2284-2305	2.5	GO:0000710(meiotic mismatch repair);GO:0000795(synaptonemal complex);GO:0003684(damaged DNA binding);GO:0006298(mismatch repair);GO:0030983(mismatched DNA binding);GO:0032300(mismatch repair complex);GO:0051026(chiasma assembly)	ko03430(Mismatch repair)
bra-miR168a-5p_L+1	XM_016626247.1	XM_016626247.1	MSH5	DNA mismatch repair protein MSH3	2051-2072	2.5	GO:0000710(meiotic mismatch repair);GO:0000795(synaptonemal complex);GO:0003684(damaged DNA binding);GO:0006298(mismatch repair);GO:0030983(mismatched DNA binding);GO:0032300(mismatch repair complex);GO:0051026(chiasma assembly)	ko03430(Mismatch repair)
bra-miR168a-5p_L+1	XM_016626245.1	XM_016626245.1	MSH5	DNA mismatch repair protein msh-2	2138-2159	2.5	GO:0000710(meiotic mismatch repair);GO:0000795(synaptonemal complex);GO:0003684(damaged DNA binding);GO:0006298(mismatch repair);GO:0030983(mismatched DNA binding);GO:0032300(mismatch repair complex);GO:0051026(chiasma assembly)	ko03430(Mismatch repair)
bra-miR168a-5p_L+1	XM_016626240.1	XM_016626240.1	MSH5	DNA mismatch repair protein msh-2	2285-2306	2.5	GO:0000710(meiotic mismatch repair);GO:0000795(synaptonemal complex);GO:0003684(damaged DNA binding);GO:0006298(mismatch repair);GO:0030983(mismatched DNA binding);GO:0032300(mismatch repair complex);GO:0051026(chiasma assembly)	ko03430(Mismatch repair)
bra-miR168a-5p_L+1	XM_016626252.1	XM_016626252.1	MSH5	DNA mismatch repair protein MSH2	2287-2308	2.5	GO:0000710(meiotic mismatch repair);GO:0000795(synaptonemal complex);GO:0003684(damaged DNA binding);GO:0006298(mismatch repair);GO:0030983(mismatched DNA binding);GO:0032300(mismatch repair complex);GO:0051026(chiasma assembly)	ko03430(Mismatch repair)
bra-miR168a-5p_L+1	XM_016626250.1	XM_016626250.1	MSH5	mismatch repair protein	2287-2308	2.5	GO:0000710(meiotic mismatch repair);GO:0000795(synaptonemal complex);GO:0003684(damaged DNA binding);GO:0006298(mismatch repair);GO:0030983(mismatched DNA binding);GO:0032300(mismatch repair complex);GO:0051026(chiasma assembly)	ko03430(Mismatch repair)
bra-miR168a-5p_L+1	XM_016626251.1	XM_016626251.1	MSH5	DNA mismatch repair protein MSH2	2287-2308	2.5	GO:0000710(meiotic mismatch repair);GO:0000795(synaptonemal complex);GO:0003684(damaged DNA binding);GO:0006298(mismatch repair);GO:0030983(mismatched DNA binding);GO:0032300(mismatch repair complex);GO:0051026(chiasma assembly)	ko03430(Mismatch repair)
bra-miR168a-5p_L+1	XM_016582313.1	XM_016582313.1	MSH5	mismatch repair protein	2401-2422	2.5	GO:0000710(meiotic mismatch repair);GO:0000795(synaptonemal complex);GO:0003684(damaged DNA binding);GO:0006298(mismatch repair);GO:0030983(mismatched DNA binding);GO:0032300(mismatch repair complex);GO:0051026(chiasma assembly)	ko03430(Mismatch repair)
bra-miR168a-5p_L+1	XM_016582312.1	XM_016582312.1	MSH5	mismatch repair protein	1645-1666	2.5	GO:0000710(meiotic mismatch repair);GO:0000795(synaptonemal complex);GO:0003684(damaged DNA binding);GO:0006298(mismatch repair);GO:0030983(mismatched DNA binding);GO:0032300(mismatch repair complex);GO:0051026(chiasma assembly)	ko03430(Mismatch repair)
bra-miR168a-5p_L+1	XM_016582316.1	XM_016582316.1	MSH5	mismatch repair protein	1728-1749	2.5	GO:0000710(meiotic mismatch repair);GO:0000795(synaptonemal complex);GO:0003684(damaged DNA binding);GO:0006298(mismatch repair);GO:0030983(mismatched DNA binding);GO:0032300(mismatch repair complex);GO:0051026(chiasma assembly)	ko03430(Mismatch repair)
bra-miR168a-5p_L+1	XM_016582311.1	XM_016582311.1	MSH5	mismatch repair protein	2021-2042	2.5	GO:0000710(meiotic mismatch repair);GO:0000795(synaptonemal complex);GO:0003684(damaged DNA binding);GO:0006298(mismatch repair);GO:0030983(mismatched DNA binding);GO:0032300(mismatch repair complex);GO:0051026(chiasma assembly)	ko03430(Mismatch repair)
bra-miR168a-5p_L+1	XM_016582310.1	XM_016582310.1	MSH5	mismatch repair protein	2072-2093	2.5	GO:0000710(meiotic mismatch repair);GO:0000795(synaptonemal complex);GO:0003684(damaged DNA binding);GO:0006298(mismatch repair);GO:0030983(mismatched DNA binding);GO:0032300(mismatch repair complex);GO:0051026(chiasma assembly)	ko03430(Mismatch repair)
bra-miR168a-5p_L+1	XM_016582314.1	XM_016582314.1	MSH5	mismatch repair protein	2073-2094	2.5	GO:0000710(meiotic mismatch repair);GO:0000795(synaptonemal complex);GO:0003684(damaged DNA binding);GO:0006298(mismatch repair);GO:0030983(mismatched DNA binding);GO:0032300(mismatch repair complex);GO:0051026(chiasma assembly)	ko03430(Mismatch repair)
bra-miR168a-5p_L+1	XM_016582315.1	XM_016582315.1	MSH5	mismatch repair protein	2073-2094	2.5	GO:0000710(meiotic mismatch repair);GO:0000795(synaptonemal complex);GO:0003684(damaged DNA binding);GO:0006298(mismatch repair);GO:0030983(mismatched DNA binding);GO:0032300(mismatch repair complex);GO:0051026(chiasma assembly)	ko03430(Mismatch repair)
ath-miR8175_L+4	XM_016583449.1	XM_016583449.1	AOP1.2	GMP synthase [glutamine-hydrolyzing]	754-777	1.5	GO:0051213(dioxygenase activity)	ko00230(Purine metabolism)
ath-miR8175_L+4	XM_016586647.1	XM_016586647.1	PCMP-H42	pentatricopeptide repeat-containing protein At2g04860	320-342	1	GO:0005739(mitochondrion);GO:0008150(biological_process);GO:0008270(zinc ion binding)	ko00500(Starch and sucrose metabolism)
ath-miR8175_L+4	XM_016586649.1	XM_016586649.1	PCMP-H42	pentatricopeptide repeat-containing protein At2g04860	320-342	1	GO:0005739(mitochondrion);GO:0008150(biological_process);GO:0008270(zinc ion binding)	ko00500(Starch and sucrose metabolism)
ath-miR8175_L+4	XM_016586645.1	XM_016586645.1	PCMP-H42	pentatricopeptide repeat-containing protein At2g04860	320-342	1	GO:0005739(mitochondrion);GO:0008150(biological_process);GO:0008270(zinc ion binding)	ko00500(Starch and sucrose metabolism)
ath-miR8175_L+4	XM_016586648.1	XM_016586648.1	PCMP-H42	pentatricopeptide repeat-containing protein At2g04860	320-342	1	GO:0005739(mitochondrion);GO:0008150(biological_process);GO:0008270(zinc ion binding)	ko00500(Starch and sucrose metabolism)
ath-miR8175_L+4	XM_016587887.1	XM_016587887.1	PEAMT	phosphoethanolamine N-methyltransferase-like	1627-1650	2.5	GO:0005737(cytoplasm);GO:0008757(S-adenosylmethionine-dependent methyltransferase activity);GO:0032259(methylation)	ko00564(Glycerophospholipid metabolism)
ath-miR8175_L+4	XM_016637931.1	XM_016637931.1	NMT1	phosphoethanolamine N-methyltransferase-like	1501-1524	2.5	GO:0005737(cytoplasm);GO:0008757(S-adenosylmethionine-dependent methyltransferase activity);GO:0032259(methylation)	ko00564(Glycerophospholipid metabolism)
PC-5p-67924_86	XM_016577739.1	XM_016577739.1	MGL	methionine gamma-lyase	1595-1618	2.5	GO:0003824(catalytic activity);GO:0005737(cytoplasm);GO:0005829(cytosol);GO:0006520(cellular amino acid metabolic process);GO:0009970(cellular response to sulfate starvation);GO:0018826(methionine gamma-lyase activity);GO:0019458(methionine catabolic process via 2-oxobutanoate);GO:0030170(pyridoxal phosphate binding);GO:0042631(cellular response to water deprivation);GO:0051289(protein homotetram…	ko00270(Cysteine and methionine metabolism);ko00450(Selenocompound metabolism)
PC-5p-67924_86	XM_016652808.1	XM_016652808.1	PCMP-H37	Pentatricopeptide repeat superfamily protein isoform 1	148-171	2.5	GO:0003674(molecular_function);GO:0005739(mitochondrion);GO:0008150(biological_process);GO:0008270(zinc ion binding)	ko01212(Fatty acid metabolism);ko00062(Fatty acid elongation)
PC-5p-67924_86	XM_016622676.1	XM_016622676.1	MGL	methionine gamma-lyase	1571-1594	1.5	GO:0003824(catalytic activity);GO:0005737(cytoplasm);GO:0005829(cytosol);GO:0006520(cellular amino acid metabolic process);GO:0009970(cellular response to sulfate starvation);GO:0018826(methionine gamma-lyase activity);GO:0019458(methionine catabolic process via 2-oxobutanoate);GO:0030170(pyridoxal phosphate binding);GO:0042631(cellular response to water deprivation);GO:0051289(protein homotetram…	ko00270(Cysteine and methionine metabolism);ko00450(Selenocompound metabolism)
PC-3p-127236_43	XM_016615428.1	XM_016615428.1	-	6	829-852	1.2	GO:0000906(6,7-dimethyl-8-ribityllumazine synthase activity);GO:0009231(riboflavin biosynthetic process);GO:0009570(chloroplast stroma)	ko00740(Riboflavin metabolism)
PC-3p-127236_43	XM_016615594.1	XM_016615594.1	OLE9	glucan endo-1	77-100	2.5	GO:0004553(hydrolase activity, hydrolyzing O-glycosyl compounds);GO:0030247(polysaccharide binding);GO:0046658(anchored component of plasma membrane)	ko00500(Starch and sucrose metabolism)
PC-3p-127236_43	XM_016615593.1	XM_016615593.1	OLE9	glucan endo-1	71-94	2.5	GO:0004553(hydrolase activity, hydrolyzing O-glycosyl compounds);GO:0030247(polysaccharide binding);GO:0046658(anchored component of plasma membrane)	ko00500(Starch and sucrose metabolism)
PC-3p-127236_43	XM_016586508.1	XM_016586508.1	At1g12700	-	3842-3865	2.5	GO:0005739(mitochondrion)
PC-3p-127236_43	XM_016586509.1	XM_016586509.1	At1g12700	-	3814-3837	2.5	GO:0005739(mitochondrion)
PC-3p-127236_43	XM_016617220.1	XM_016617220.1	-	-	1073-1096	2	GO:0003677(DNA binding);GO:0005634(nucleus);GO:0006355(regulation of transcription, DNA-templated);GO:0008270(zinc ion binding)
PC-3p-127236_43	XM_016586511.1	XM_016586511.1	At1g12700	-	2490-2513	2.5	GO:0005739(mitochondrion)
PC-3p-127236_43	XM_016586512.1	XM_016586512.1	At1g12700	-	2487-2510	2.5	GO:0005739(mitochondrion)
PC-3p-127236_43	XM_016657464.1	XM_016657464.1	At1g04910	-	968-991	0.8	GO:0005737(cytoplasm)
csi-miR160c-5p_R+1	XM_016592446.1	XM_016592446.1	ARF18	ADP-ribosylation factor 1	128-149	0.8	GO:0003677(DNA binding);GO:0003700(transcription factor activity, sequence-specific DNA binding);GO:0005634(nucleus);GO:0006351(transcription, DNA-templated);GO:0006355(regulation of transcription, DNA-templated);GO:0007389(pattern specification process);GO:0009733(response to auxin);GO:0009734(auxin-activated signaling pathway);GO:0035198(miRNA binding);GO:0048829(root cap development);GO:005130…	ko04075(Plant hormone signal transduction)
csi-miR160c-5p_R+1	XM_016578085.1	XM_016578085.1	ARF22	auxin response factor 7-like	1608-1629	1.8	GO:0003677(DNA binding);GO:0003700(transcription factor activity, sequence-specific DNA binding);GO:0005634(nucleus);GO:0006351(transcription, DNA-templated);GO:0006355(regulation of transcription, DNA-templated);GO:0007389(pattern specification process);GO:0009734(auxin-activated signaling pathway);GO:0009738(abscisic acid-activated signaling pathway);GO:0009743(response to carbohydrate);GO:0010…	ko04075(Plant hormone signal transduction)
csi-miR160c-5p_R+1	XM_016578082.1	XM_016578082.1	ARF22	auxin response factor 7-like	1496-1517	1.8	GO:0003677(DNA binding);GO:0003700(transcription factor activity, sequence-specific DNA binding);GO:0005634(nucleus);GO:0006351(transcription, DNA-templated);GO:0006355(regulation of transcription, DNA-templated);GO:0007389(pattern specification process);GO:0009734(auxin-activated signaling pathway);GO:0009738(abscisic acid-activated signaling pathway);GO:0009743(response to carbohydrate);GO:0010…	ko04075(Plant hormone signal transduction)
csi-miR160c-5p_R+1	XM_016578084.1	XM_016578084.1	ARF22	auxin response factor 7-like	1456-1477	1.8	GO:0003677(DNA binding);GO:0003700(transcription factor activity, sequence-specific DNA binding);GO:0005634(nucleus);GO:0006351(transcription, DNA-templated);GO:0006355(regulation of transcription, DNA-templated);GO:0007389(pattern specification process);GO:0009734(auxin-activated signaling pathway);GO:0009738(abscisic acid-activated signaling pathway);GO:0009743(response to carbohydrate);GO:0010…	ko04075(Plant hormone signal transduction)
csi-miR160c-5p_R+1	XM_016578083.1	XM_016578083.1	ARF22	auxin response factor 7-like	1538-1559	1.8	GO:0003677(DNA binding);GO:0003700(transcription factor activity, sequence-specific DNA binding);GO:0005634(nucleus);GO:0006351(transcription, DNA-templated);GO:0006355(regulation of transcription, DNA-templated);GO:0007389(pattern specification process);GO:0009734(auxin-activated signaling pathway);GO:0009738(abscisic acid-activated signaling pathway);GO:0009743(response to carbohydrate);GO:0010…	ko04075(Plant hormone signal transduction)
csi-miR160c-5p_R+1	XM_016578081.1	XM_016578081.1	ARF22	auxin response factor 7-like	1543-1564	1.8	GO:0003677(DNA binding);GO:0003700(transcription factor activity, sequence-specific DNA binding);GO:0005634(nucleus);GO:0006351(transcription, DNA-templated);GO:0006355(regulation of transcription, DNA-templated);GO:0007389(pattern specification process);GO:0009734(auxin-activated signaling pathway);GO:0009738(abscisic acid-activated signaling pathway);GO:0009743(response to carbohydrate);GO:0010…	ko04075(Plant hormone signal transduction)
csi-miR160c-5p_R+1	XM_016578086.1	XM_016578086.1	ARF22	auxin response factor 7-like	1546-1567	1.8	GO:0003677(DNA binding);GO:0003700(transcription factor activity, sequence-specific DNA binding);GO:0005634(nucleus);GO:0006351(transcription, DNA-templated);GO:0006355(regulation of transcription, DNA-templated);GO:0007389(pattern specification process);GO:0009734(auxin-activated signaling pathway);GO:0009738(abscisic acid-activated signaling pathway);GO:0009743(response to carbohydrate);GO:0010…	ko04075(Plant hormone signal transduction)
csi-miR160c-5p_R+1	XM_016649082.1	XM_016649082.1	At1g65750	uncharacterized LOC106392594	2911-2931	1.5	GO:0003676(nucleic acid binding);GO:0003723(RNA binding);GO:0003964(RNA-directed DNA polymerase activity);GO:0005739(mitochondrion);GO:0006278(RNA-dependent DNA biosynthetic process)	ko01210(2-Oxocarboxylic acid metabolism);ko01230(Biosynthesis of amino acids);ko00220(Arginine biosynthesis)
csi-miR160c-5p_R+1	XM_016628558.1	XM_016628558.1	-	-	1389-1409	2.5	-
csi-miR160c-5p_R+1	XM_016584484.1	XM_016584484.1	ARF17	auxin response factor 3	1443-1464	1.5	GO:0000987(core promoter proximal region sequence-specific DNA binding);GO:0003700(transcription factor activity, sequence-specific DNA binding);GO:0005634(nucleus);GO:0006351(transcription, DNA-templated);GO:0006355(regulation of transcription, DNA-templated);GO:0009555(pollen development);GO:0009653(anatomical structure morphogenesis);GO:0009734(auxin-activated signaling pathway);GO:0010208(pol…	ko04075(Plant hormone signal transduction)
csi-miR160c-5p_R+1	XM_016585764.1	XM_016585764.1	ARF17	auxin response factor 3	1449-1470	1.5	GO:0000987(core promoter proximal region sequence-specific DNA binding);GO:0003700(transcription factor activity, sequence-specific DNA binding);GO:0005634(nucleus);GO:0006351(transcription, DNA-templated);GO:0006355(regulation of transcription, DNA-templated);GO:0009555(pollen development);GO:0009653(anatomical structure morphogenesis);GO:0009734(auxin-activated signaling pathway);GO:0010208(pol…	ko04075(Plant hormone signal transduction)
csi-miR160c-5p_R+1	XM_016616661.1	XM_016616661.1	ARF22	auxin response factor 7-like	1483-1504	1.8	GO:0003677(DNA binding);GO:0003700(transcription factor activity, sequence-specific DNA binding);GO:0005634(nucleus);GO:0006351(transcription, DNA-templated);GO:0006355(regulation of transcription, DNA-templated);GO:0007389(pattern specification process);GO:0009734(auxin-activated signaling pathway);GO:0009738(abscisic acid-activated signaling pathway);GO:0009743(response to carbohydrate);GO:0010…	ko04075(Plant hormone signal transduction)
csi-miR160c-5p_R+1	XM_016616660.1	XM_016616660.1	ARF22	auxin response factor 7-like	1597-1618	1.8	GO:0003677(DNA binding);GO:0003700(transcription factor activity, sequence-specific DNA binding);GO:0005634(nucleus);GO:0006351(transcription, DNA-templated);GO:0006355(regulation of transcription, DNA-templated);GO:0007389(pattern specification process);GO:0009734(auxin-activated signaling pathway);GO:0009738(abscisic acid-activated signaling pathway);GO:0009743(response to carbohydrate);GO:0010…	ko04075(Plant hormone signal transduction)
csi-miR160c-5p_R+1	XM_016616659.1	XM_016616659.1	ARF22	auxin response factor 7-like	1706-1727	1.8	GO:0003677(DNA binding);GO:0003700(transcription factor activity, sequence-specific DNA binding);GO:0005634(nucleus);GO:0006351(transcription, DNA-templated);GO:0006355(regulation of transcription, DNA-templated);GO:0007389(pattern specification process);GO:0009734(auxin-activated signaling pathway);GO:0009738(abscisic acid-activated signaling pathway);GO:0009743(response to carbohydrate);GO:0010…	ko04075(Plant hormone signal transduction)
csi-miR160c-5p_R+1	XM_016616658.1	XM_016616658.1	ARF22	auxin response factor 7-like	1750-1771	1.8	GO:0003677(DNA binding);GO:0003700(transcription factor activity, sequence-specific DNA binding);GO:0005634(nucleus);GO:0006351(transcription, DNA-templated);GO:0006355(regulation of transcription, DNA-templated);GO:0007389(pattern specification process);GO:0009734(auxin-activated signaling pathway);GO:0009738(abscisic acid-activated signaling pathway);GO:0009743(response to carbohydrate);GO:0010…	ko04075(Plant hormone signal transduction)
csi-miR160c-5p_R+1	XM_016616657.1	XM_016616657.1	ARF22	auxin response factor 7-like	1836-1857	1.8	GO:0003677(DNA binding);GO:0003700(transcription factor activity, sequence-specific DNA binding);GO:0005634(nucleus);GO:0006351(transcription, DNA-templated);GO:0006355(regulation of transcription, DNA-templated);GO:0007389(pattern specification process);GO:0009734(auxin-activated signaling pathway);GO:0009738(abscisic acid-activated signaling pathway);GO:0009743(response to carbohydrate);GO:0010…	ko04075(Plant hormone signal transduction)
csi-miR160c-5p_R+1	XM_016586695.1	XM_016586695.1	ARF18	auxin response factor 18-like	2-23	1.8	GO:0003677(DNA binding);GO:0003700(transcription factor activity, sequence-specific DNA binding);GO:0005634(nucleus);GO:0006351(transcription, DNA-templated);GO:0006355(regulation of transcription, DNA-templated);GO:0007389(pattern specification process);GO:0009733(response to auxin);GO:0009734(auxin-activated signaling pathway);GO:0035198(miRNA binding);GO:0048829(root cap development);GO:005130…	ko04075(Plant hormone signal transduction)
csi-miR160c-5p_R+1	XM_016655248.1	XM_016655248.1	ARF18	auxin response factor 7-like	1917-1938	0.8	GO:0003677(DNA binding);GO:0003700(transcription factor activity, sequence-specific DNA binding);GO:0005634(nucleus);GO:0006351(transcription, DNA-templated);GO:0006355(regulation of transcription, DNA-templated);GO:0007389(pattern specification process);GO:0009734(auxin-activated signaling pathway);GO:0009738(abscisic acid-activated signaling pathway);GO:0009743(response to carbohydrate);GO:0010…	ko04075(Plant hormone signal transduction)
csi-miR160c-5p_R+1	XM_016655249.1	XM_016655249.1	ARF18	auxin response factor 7-like	1496-1517	0.8	GO:0003677(DNA binding);GO:0003700(transcription factor activity, sequence-specific DNA binding);GO:0005634(nucleus);GO:0006351(transcription, DNA-templated);GO:0006355(regulation of transcription, DNA-templated);GO:0007389(pattern specification process);GO:0009734(auxin-activated signaling pathway);GO:0009738(abscisic acid-activated signaling pathway);GO:0009743(response to carbohydrate);GO:0010…	ko04075(Plant hormone signal transduction)
csi-miR160c-5p_R+1	XM_016655250.1	XM_016655250.1	ARF18	auxin response factor 7-like	1475-1496	0.8	GO:0003677(DNA binding);GO:0003700(transcription factor activity, sequence-specific DNA binding);GO:0005634(nucleus);GO:0006351(transcription, DNA-templated);GO:0006355(regulation of transcription, DNA-templated);GO:0007389(pattern specification process);GO:0009734(auxin-activated signaling pathway);GO:0009738(abscisic acid-activated signaling pathway);GO:0009743(response to carbohydrate);GO:0010…	ko04075(Plant hormone signal transduction)
csi-miR160c-5p_R+1	XM_016602462.1	XM_016602462.1	ARF22	ADP-ribosylation factor 1	1574-1595	0.8	GO:0003677(DNA binding);GO:0003700(transcription factor activity, sequence-specific DNA binding);GO:0005634(nucleus);GO:0006351(transcription, DNA-templated);GO:0006355(regulation of transcription, DNA-templated);GO:0007389(pattern specification process);GO:0009733(response to auxin);GO:0009734(auxin-activated signaling pathway);GO:0035198(miRNA binding);GO:0048829(root cap development);GO:005130…	ko04075(Plant hormone signal transduction)
csi-miR160c-5p_R+1	XM_016640136.1	XM_016640136.1	ARF18	hypothetical protein	1841-1862	1.8	GO:0003677(DNA binding);GO:0003700(transcription factor activity, sequence-specific DNA binding);GO:0005634(nucleus);GO:0006351(transcription, DNA-templated);GO:0006355(regulation of transcription, DNA-templated);GO:0007389(pattern specification process);GO:0009734(auxin-activated signaling pathway);GO:0009738(abscisic acid-activated signaling pathway);GO:0009743(response to carbohydrate);GO:0010…	ko04075(Plant hormone signal transduction)
csi-miR160c-5p_R+1	XM_016640135.1	XM_016640135.1	ARF18	hypothetical protein	1632-1653	1.8	GO:0003677(DNA binding);GO:0003700(transcription factor activity, sequence-specific DNA binding);GO:0005634(nucleus);GO:0006351(transcription, DNA-templated);GO:0006355(regulation of transcription, DNA-templated);GO:0007389(pattern specification process);GO:0009734(auxin-activated signaling pathway);GO:0009738(abscisic acid-activated signaling pathway);GO:0009743(response to carbohydrate);GO:0010…	ko04075(Plant hormone signal transduction)
csi-miR160c-5p_R+1	XM_016640134.1	XM_016640134.1	ARF18	hypothetical protein	1896-1917	1.8	GO:0003677(DNA binding);GO:0003700(transcription factor activity, sequence-specific DNA binding);GO:0005634(nucleus);GO:0006351(transcription, DNA-templated);GO:0006355(regulation of transcription, DNA-templated);GO:0007389(pattern specification process);GO:0009734(auxin-activated signaling pathway);GO:0009738(abscisic acid-activated signaling pathway);GO:0009743(response to carbohydrate);GO:0010…	ko04075(Plant hormone signal transduction)
csi-miR160c-5p_R+1	XM_016657185.1	XM_016657185.1	At1g65750	uncharacterized LOC106392594	4669-4690	0.5	GO:0003676(nucleic acid binding);GO:0003723(RNA binding);GO:0003964(RNA-directed DNA polymerase activity);GO:0005739(mitochondrion);GO:0006278(RNA-dependent DNA biosynthetic process)	ko01210(2-Oxocarboxylic acid metabolism);ko01230(Biosynthesis of amino acids);ko00220(Arginine biosynthesis)
csi-miR160c-5p_R+1	XM_016657185.1	XM_016657185.1	At1g65750	uncharacterized LOC106392594	4574-4596	2.2	GO:0003676(nucleic acid binding);GO:0003723(RNA binding);GO:0003964(RNA-directed DNA polymerase activity);GO:0005739(mitochondrion);GO:0006278(RNA-dependent DNA biosynthetic process)	ko01210(2-Oxocarboxylic acid metabolism);ko01230(Biosynthesis of amino acids);ko00220(Arginine biosynthesis)
csi-miR160c-5p_R+1	XM_016641934.1	XM_016641934.1	ARF22	auxin response factor 7-like	2152-2173	1.8	GO:0003677(DNA binding);GO:0003700(transcription factor activity, sequence-specific DNA binding);GO:0005634(nucleus);GO:0006351(transcription, DNA-templated);GO:0006355(regulation of transcription, DNA-templated);GO:0007389(pattern specification process);GO:0009733(response to auxin);GO:0009734(auxin-activated signaling pathway);GO:0035198(miRNA binding);GO:0048829(root cap development);GO:005130…	ko04075(Plant hormone signal transduction)
csi-miR160c-5p_R+1	XM_016641933.1	XM_016641933.1	ARF18	auxin response factor 7-like	2149-2170	1.8	GO:0003677(DNA binding);GO:0003700(transcription factor activity, sequence-specific DNA binding);GO:0005634(nucleus);GO:0006351(transcription, DNA-templated);GO:0006355(regulation of transcription, DNA-templated);GO:0007389(pattern specification process);GO:0009733(response to auxin);GO:0009734(auxin-activated signaling pathway);GO:0035198(miRNA binding);GO:0048829(root cap development);GO:005130…	ko04075(Plant hormone signal transduction)
csi-miR160c-5p_R+1	XM_016589514.1	XM_016589514.1	ARF16	auxin response factor 7-like	1681-1702	0.8	GO:0003677(DNA binding);GO:0003700(transcription factor activity, sequence-specific DNA binding);GO:0005634(nucleus);GO:0006351(transcription, DNA-templated);GO:0006355(regulation of transcription, DNA-templated);GO:0007389(pattern specification process);GO:0009733(response to auxin);GO:0009734(auxin-activated signaling pathway);GO:0035198(miRNA binding);GO:0048829(root cap development);GO:005130…	ko04075(Plant hormone signal transduction)
csi-miR160c-5p_R+1	XM_016589515.1	XM_016589515.1	ARF16	auxin response factor 7-like	1525-1546	0.8	GO:0003677(DNA binding);GO:0003700(transcription factor activity, sequence-specific DNA binding);GO:0005634(nucleus);GO:0006351(transcription, DNA-templated);GO:0006355(regulation of transcription, DNA-templated);GO:0007389(pattern specification process);GO:0009733(response to auxin);GO:0009734(auxin-activated signaling pathway);GO:0035198(miRNA binding);GO:0048829(root cap development);GO:005130…	ko04075(Plant hormone signal transduction)
csi-miR160c-5p_R+1	XM_016620081.1	XM_016620081.1	ARF18	auxin response factor 7-like	2176-2197	1.8	GO:0003677(DNA binding);GO:0003700(transcription factor activity, sequence-specific DNA binding);GO:0005634(nucleus);GO:0006351(transcription, DNA-templated);GO:0006355(regulation of transcription, DNA-templated);GO:0007389(pattern specification process);GO:0009733(response to auxin);GO:0009734(auxin-activated signaling pathway);GO:0035198(miRNA binding);GO:0048829(root cap development);GO:005130…	ko04075(Plant hormone signal transduction)
csi-miR160c-5p_R+1	XM_016620080.1	XM_016620080.1	ARF18	auxin response factor 7-like	2173-2194	1.8	GO:0003677(DNA binding);GO:0003700(transcription factor activity, sequence-specific DNA binding);GO:0005634(nucleus);GO:0006351(transcription, DNA-templated);GO:0006355(regulation of transcription, DNA-templated);GO:0007389(pattern specification process);GO:0009733(response to auxin);GO:0009734(auxin-activated signaling pathway);GO:0035198(miRNA binding);GO:0048829(root cap development);GO:005130…	ko04075(Plant hormone signal transduction)
gma-MIR9724-p5	XM_016647150.1	XM_016647150.1	SKIP11	-	1041-1064	2	GO:0003674(molecular_function);GO:0005634(nucleus);GO:0009507(chloroplast);GO:0016567(protein ubiquitination)
gma-MIR9724-p5	XM_016647150.1	XM_016647150.1	SKIP11	-	832-855	1.5	GO:0003674(molecular_function);GO:0005634(nucleus);GO:0009507(chloroplast);GO:0016567(protein ubiquitination)
gma-MIR9724-p5	XM_016611014.1	XM_016611014.1	CNGC20	probable cyclic nucleotide-gated ion channel 20	905-928	2.5	GO:0005249(voltage-gated potassium channel activity);GO:0005887(integral component of plasma membrane);GO:0042391(regulation of membrane potential)	ko04626(Plant-pathogen interaction)
gma-MIR9724-p5	XM_016581117.1	XM_016581117.1	strap	serine-threonine kinase receptor-associated protein-like	4356-4379	2	GO:0003677(DNA binding);GO:0005634(nucleus);GO:0008150(biological_process);GO:0046983(protein dimerization activity)	ko03013(RNA transport)
PC-3p-258597_16	XM_016622891.1	XM_016622891.1	At4g27595	uncharacterized LOC103874839	1722-1741	2	GO:0000795(synaptonemal complex);GO:0007131(reciprocal meiotic recombination)	ko03040(Spliceosome)
PC-3p-258597_16	XM_016622892.1	XM_016622892.1	At4g27595	uncharacterized LOC103874839	1715-1734	2	GO:0000795(synaptonemal complex);GO:0007131(reciprocal meiotic recombination)	ko03040(Spliceosome)
PC-3p-258597_16	XM_016622893.1	XM_016622893.1	At4g27595	uncharacterized LOC103874839	1507-1526	2	GO:0000795(synaptonemal complex);GO:0007131(reciprocal meiotic recombination)	ko03040(Spliceosome)
PC-3p-258597_16	XM_016660464.1	XM_016660464.1	At4g27595	uncharacterized LOC106427234	1669-1689	2.2	GO:0000795(synaptonemal complex);GO:0007131(reciprocal meiotic recombination)	ko03040(Spliceosome)
PC-3p-258597_16	XM_016660465.1	XM_016660465.1	At4g27595	uncharacterized LOC106427234	1662-1682	2.2	GO:0000795(synaptonemal complex);GO:0007131(reciprocal meiotic recombination)	ko03040(Spliceosome)
PC-3p-258597_16	XM_016660466.1	XM_016660466.1	At4g27595	uncharacterized LOC106427234	1104-1124	2.2	GO:0000795(synaptonemal complex);GO:0007131(reciprocal meiotic recombination)	ko03040(Spliceosome)
PC-3p-258597_16	XM_016645866.1	XM_016645866.1	SMC2-2	-	834-854	1.8	GO:0000796(condensin complex);GO:0005215(transporter activity);GO:0005524(ATP binding);GO:0005634(nucleus);GO:0006810(transport);GO:0007076(mitotic chromosome condensation);GO:0051301(cell division);GO:0051321(meiotic cell cycle)
PC-3p-258597_16	XM_016645864.1	XM_016645864.1	SMC2-2	-	834-854	1.8	GO:0000796(condensin complex);GO:0005215(transporter activity);GO:0005524(ATP binding);GO:0005634(nucleus);GO:0006810(transport);GO:0007076(mitotic chromosome condensation);GO:0051301(cell division);GO:0051321(meiotic cell cycle)
PC-3p-258597_16	XM_016645865.1	XM_016645865.1	SMC2-2	-	834-854	1.8	GO:0000796(condensin complex);GO:0005215(transporter activity);GO:0005524(ATP binding);GO:0005634(nucleus);GO:0006810(transport);GO:0007076(mitotic chromosome condensation);GO:0051301(cell division);GO:0051321(meiotic cell cycle)
PC-3p-258597_16	XM_016624112.1	XM_016624112.1	ROPGAP2	-	768-788	2.5	GO:0005096(GTPase activator activity);GO:0005737(cytoplasm);GO:0007165(signal transduction)
PC-3p-258597_16	XM_016624111.1	XM_016624111.1	ROPGAP2	-	870-890	2.5	GO:0005096(GTPase activator activity);GO:0005737(cytoplasm);GO:0007165(signal transduction)
PC-3p-258597_16	XM_016624110.1	XM_016624110.1	ROPGAP2	-	1348-1368	2.5	GO:0005096(GTPase activator activity);GO:0005737(cytoplasm);GO:0007165(signal transduction)
PC-3p-258597_16	XM_016577836.1	XM_016577836.1	-	-	364-384	2.5	GO:0003674(molecular_function);GO:0005634(nucleus);GO:0008150(biological_process)
PC-3p-258597_16	XM_016577982.1	XM_016577982.1	-	-	597-617	2.5	GO:0003674(molecular_function);GO:0005737(cytoplasm);GO:0005829(cytosol);GO:0005886(plasma membrane);GO:0009737(response to abscisic acid);GO:0016021(integral component of membrane);GO:0046686(response to cadmium ion)
PC-3p-258597_16	XM_016578479.1	XM_016578479.1	MAN2	mannan endo-1	1293-1313	1.5	GO:0016985(mannan endo-1,4-beta-mannosidase activity);GO:0046355(mannan catabolic process)	ko00051(Fructose and mannose metabolism)
PC-3p-258597_16	XM_016578478.1	XM_016578478.1	MAN2	mannan endo-1	1564-1584	1.5	GO:0016985(mannan endo-1,4-beta-mannosidase activity);GO:0046355(mannan catabolic process)	ko00051(Fructose and mannose metabolism)
PC-3p-258597_16	XM_016647259.1	XM_016647259.1	ATL7	ring-box protein	974-994	2.5	GO:0005634(nucleus);GO:0008270(zinc ion binding);GO:0016021(integral component of membrane);GO:0016567(protein ubiquitination)	ko04141(Protein processing in endoplasmic reticulum);ko04120(Ubiquitin mediated proteolysis);ko03420(Nucleotide excision repair)
PC-3p-258597_16	XM_016647257.1	XM_016647257.1	ATL7	ring-box protein	1120-1140	2.5	GO:0005634(nucleus);GO:0008270(zinc ion binding);GO:0016021(integral component of membrane);GO:0016567(protein ubiquitination)	ko04141(Protein processing in endoplasmic reticulum);ko04120(Ubiquitin mediated proteolysis);ko03420(Nucleotide excision repair)
PC-3p-258597_16	XM_016578867.1	XM_016578867.1	SUVR2	histone-lysine N-methyltransferase	1029-1049	2.5	GO:0005634(nucleus);GO:0005694(chromosome);GO:0005730(nucleolus);GO:0008270(zinc ion binding);GO:0009507(chloroplast);GO:0018024(histone-lysine N-methyltransferase activity);GO:0031047(gene silencing by RNA);GO:0034968(histone lysine methylation)	ko00310(Lysine degradation)
PC-3p-258597_16	XM_016660473.1	XM_016660473.1	R1	-	3885-3905	1.5	GO:0005515(protein binding);GO:0005524(ATP binding);GO:0005739(mitochondrion);GO:0005983(starch catabolic process);GO:0009507(chloroplast);GO:0009570(chloroplast stroma);GO:0009610(response to symbiotic fungus);GO:0009631(cold acclimation);GO:0009941(chloroplast envelope);GO:0016310(phosphorylation);GO:0046872(metal ion binding);GO:0050521(alpha-glucan, water dikinase activity)
PC-3p-258597_16	XM_016660478.1	XM_016660478.1	R1	-	3747-3767	1.5	GO:0005515(protein binding);GO:0005524(ATP binding);GO:0005739(mitochondrion);GO:0005983(starch catabolic process);GO:0009507(chloroplast);GO:0009570(chloroplast stroma);GO:0009610(response to symbiotic fungus);GO:0009631(cold acclimation);GO:0009941(chloroplast envelope);GO:0016310(phosphorylation);GO:0046872(metal ion binding);GO:0050521(alpha-glucan, water dikinase activity)
PC-3p-258597_16	XM_016610663.1	XM_016610663.1	ACA4	alpha carbonic anhydrase 4-like	461-480	2.2	GO:0004089(carbonate dehydratase activity);GO:0005737(cytoplasm);GO:0006730(one-carbon metabolic process);GO:0008270(zinc ion binding);GO:0009535(chloroplast thylakoid membrane);GO:0009570(chloroplast stroma)	ko00910(Nitrogen metabolism)
PC-3p-258597_16	XM_016610662.1	XM_016610662.1	ACA4	alpha carbonic anhydrase 4-like	461-480	2.2	GO:0004089(carbonate dehydratase activity);GO:0005737(cytoplasm);GO:0006730(one-carbon metabolic process);GO:0008270(zinc ion binding);GO:0009535(chloroplast thylakoid membrane);GO:0009570(chloroplast stroma)	ko00910(Nitrogen metabolism)
PC-3p-258597_16	XM_016610665.1	XM_016610665.1	ACA4	alpha carbonic anhydrase 4-like	461-480	2.2	GO:0004089(carbonate dehydratase activity);GO:0005737(cytoplasm);GO:0006730(one-carbon metabolic process);GO:0008270(zinc ion binding);GO:0009535(chloroplast thylakoid membrane);GO:0009570(chloroplast stroma)	ko00910(Nitrogen metabolism)
PC-3p-258597_16	XM_016610664.1	XM_016610664.1	ACA4	alpha carbonic anhydrase 4-like	461-480	2.2	GO:0004089(carbonate dehydratase activity);GO:0005737(cytoplasm);GO:0006730(one-carbon metabolic process);GO:0008270(zinc ion binding);GO:0009535(chloroplast thylakoid membrane);GO:0009570(chloroplast stroma)	ko00910(Nitrogen metabolism)
PC-3p-258597_16	XM_016610666.1	XM_016610666.1	ACA4	alpha carbonic anhydrase 4-like	461-480	2.2	GO:0004089(carbonate dehydratase activity);GO:0005737(cytoplasm);GO:0006730(one-carbon metabolic process);GO:0008270(zinc ion binding);GO:0009535(chloroplast thylakoid membrane);GO:0009570(chloroplast stroma)	ko00910(Nitrogen metabolism)
PC-3p-258597_16	XM_016610661.1	XM_016610661.1	ACA4	alpha carbonic anhydrase 4-like	461-480	2.2	GO:0004089(carbonate dehydratase activity);GO:0005737(cytoplasm);GO:0006730(one-carbon metabolic process);GO:0008270(zinc ion binding);GO:0009535(chloroplast thylakoid membrane);GO:0009570(chloroplast stroma)	ko00910(Nitrogen metabolism)
PC-3p-258597_16	XM_016579705.1	XM_016579705.1	NUA	nuclear-pore anchor	2999-3019	2.5	GO:0005487(nucleocytoplasmic transporter activity);GO:0005643(nuclear pore);GO:0006913(nucleocytoplasmic transport);GO:0007094(mitotic spindle assembly checkpoint)	ko03013(RNA transport)
PC-3p-258597_16	XM_016595549.1	XM_016595549.1	R1	-	3081-3101	2	GO:0005515(protein binding);GO:0005524(ATP binding);GO:0005739(mitochondrion);GO:0005983(starch catabolic process);GO:0009507(chloroplast);GO:0009570(chloroplast stroma);GO:0009610(response to symbiotic fungus);GO:0009631(cold acclimation);GO:0009941(chloroplast envelope);GO:0016310(phosphorylation);GO:0046872(metal ion binding);GO:0050521(alpha-glucan, water dikinase activity)
PC-3p-258597_16	XM_016595550.1	XM_016595550.1	R1	-	2985-3005	2	GO:0005515(protein binding);GO:0005524(ATP binding);GO:0005739(mitochondrion);GO:0005983(starch catabolic process);GO:0009507(chloroplast);GO:0009570(chloroplast stroma);GO:0009610(response to symbiotic fungus);GO:0009631(cold acclimation);GO:0009941(chloroplast envelope);GO:0016310(phosphorylation);GO:0046872(metal ion binding);GO:0050521(alpha-glucan, water dikinase activity)
PC-3p-258597_16	XM_016626509.1	XM_016626509.1	-	-	590-610	1.5	GO:0003674(molecular_function);GO:0005737(cytoplasm);GO:0005829(cytosol);GO:0005886(plasma membrane);GO:0009737(response to abscisic acid);GO:0016021(integral component of membrane);GO:0046686(response to cadmium ion)
PC-3p-258597_16	XM_016590328.1	XM_016590328.1	At5g62370	-	2571-2591	1.2	GO:0005739(mitochondrion);GO:0008150(biological_process)
PC-3p-258597_16	XM_016611655.1	XM_016611655.1	-	-	813-832	2.5	GO:0007165(signal transduction);GO:0016020(membrane)
PC-3p-258597_16	XM_016612734.1	XM_016612734.1	At2g20020	-	2311-2332	2.5	GO:0000373(Group II intron splicing);GO:0003723(RNA binding);GO:0006397(mRNA processing);GO:0009507(chloroplast);GO:0009570(chloroplast stroma);GO:0030529(intracellular ribonucleoprotein complex)
PC-3p-258597_16	XM_016612733.1	XM_016612733.1	At2g20020	-	2315-2336	2.5	GO:0000373(Group II intron splicing);GO:0003723(RNA binding);GO:0006397(mRNA processing);GO:0009507(chloroplast);GO:0009570(chloroplast stroma);GO:0030529(intracellular ribonucleoprotein complex)
PC-3p-258597_16	XM_016582191.1	XM_016582191.1	SPL8	-	801-821	2.2	GO:0003677(DNA binding);GO:0005634(nucleus);GO:0005737(cytoplasm);GO:0006351(transcription, DNA-templated);GO:0006355(regulation of transcription, DNA-templated);GO:0009554(megasporogenesis);GO:0009556(microsporogenesis);GO:0030154(cell differentiation);GO:0046872(metal ion binding);GO:0048653(anther development)
PC-3p-258597_16	XM_016582193.1	XM_016582193.1	SPL8	-	795-815	2.2	GO:0003677(DNA binding);GO:0005634(nucleus);GO:0005737(cytoplasm);GO:0006351(transcription, DNA-templated);GO:0006355(regulation of transcription, DNA-templated);GO:0009554(megasporogenesis);GO:0009556(microsporogenesis);GO:0030154(cell differentiation);GO:0046872(metal ion binding);GO:0048653(anther development)
PC-3p-258597_16	XM_016613054.1	XM_016613054.1	ATL58	ring-box protein	1146-1166	2.5	GO:0005634(nucleus);GO:0008270(zinc ion binding);GO:0016021(integral component of membrane);GO:0016567(protein ubiquitination)	ko04141(Protein processing in endoplasmic reticulum);ko04120(Ubiquitin mediated proteolysis);ko03420(Nucleotide excision repair)
PC-3p-258597_16	XM_016611124.1	XM_016611124.1	-	uncharacterized LOC107026079	1233-1253	2.5	GO:0003674(molecular_function);GO:0008150(biological_process);GO:0009507(chloroplast);GO:0016021(integral component of membrane)	ko04146(Peroxisome)
PC-3p-258597_16	XM_016629042.1	XM_016629042.1	-	uncharacterized LOC102590255	664-684	2	GO:0003674(molecular_function);GO:0008150(biological_process);GO:0009507(chloroplast);GO:0016021(integral component of membrane)	ko04146(Peroxisome)
PC-3p-258597_16	XM_016653257.1	XM_016653257.1	GME-1	GDP-mannose 3',5'-epimerase	1174-1194	2.5	GO:0003824(catalytic activity);GO:0005737(cytoplasm);GO:0005829(cytosol);GO:0009225(nucleotide-sugar metabolic process);GO:0019853(L-ascorbic acid biosynthetic process);GO:0047918(GDP-mannose 3,5-epimerase activity);GO:0051287(NAD binding)	ko00053(Ascorbate and aldarate metabolism);ko00520(Amino sugar and nucleotide sugar metabolism)
PC-3p-258597_16	XM_016615557.1	XM_016615557.1	NUA	nuclear-pore anchor	3139-3159	2.5	GO:0005487(nucleocytoplasmic transporter activity);GO:0005643(nuclear pore);GO:0006913(nucleocytoplasmic transport);GO:0007094(mitotic spindle assembly checkpoint)	ko03013(RNA transport)
PC-3p-258597_16	XM_016639601.1	XM_016639601.1	-	-	1084-1104	2	GO:0003674(molecular_function);GO:0005739(mitochondrion);GO:0005768(endosome);GO:0005794(Golgi apparatus);GO:0005802(trans-Golgi network);GO:0008150(biological_process);GO:0016021(integral component of membrane)
PC-3p-258597_16	XM_016634182.1	XM_016634182.1	TPX2	-	272-292	2.5	GO:0003674(molecular_function);GO:0005634(nucleus);GO:0005739(mitochondrion);GO:0005819(spindle);GO:0005874(microtubule);GO:0032147(activation of protein kinase activity);GO:0060236(regulation of mitotic spindle organization)
PC-3p-258597_16	XM_016634181.1	XM_016634181.1	TPX2	-	272-292	2.5	GO:0003674(molecular_function);GO:0005634(nucleus);GO:0005739(mitochondrion);GO:0005819(spindle);GO:0005874(microtubule);GO:0032147(activation of protein kinase activity);GO:0060236(regulation of mitotic spindle organization)
PC-3p-258597_16	XM_016634180.1	XM_016634180.1	TPX2	-	272-292	2.5	GO:0003674(molecular_function);GO:0005634(nucleus);GO:0005739(mitochondrion);GO:0005819(spindle);GO:0005874(microtubule);GO:0032147(activation of protein kinase activity);GO:0060236(regulation of mitotic spindle organization)
PC-3p-258597_16	XM_016657997.1	XM_016657997.1	SUVR2	histone-lysine N-methyltransferase	1108-1128	2.5	GO:0005634(nucleus);GO:0005694(chromosome);GO:0005730(nucleolus);GO:0008270(zinc ion binding);GO:0009507(chloroplast);GO:0018024(histone-lysine N-methyltransferase activity);GO:0031047(gene silencing by RNA);GO:0034968(histone lysine methylation)	ko00310(Lysine degradation)
PC-3p-258597_16	XM_016657998.1	XM_016657998.1	SUVR2	histone-lysine N-methyltransferase	950-970	2.5	GO:0005634(nucleus);GO:0005694(chromosome);GO:0005730(nucleolus);GO:0008270(zinc ion binding);GO:0009507(chloroplast);GO:0018024(histone-lysine N-methyltransferase activity);GO:0031047(gene silencing by RNA);GO:0034968(histone lysine methylation)	ko00310(Lysine degradation)
PC-3p-258597_16	XM_016657996.1	XM_016657996.1	SUVR2	histone-lysine N-methyltransferase	1055-1075	2.5	GO:0005634(nucleus);GO:0005694(chromosome);GO:0005730(nucleolus);GO:0008270(zinc ion binding);GO:0009507(chloroplast);GO:0018024(histone-lysine N-methyltransferase activity);GO:0031047(gene silencing by RNA);GO:0034968(histone lysine methylation)	ko00310(Lysine degradation)
PC-3p-258597_16	XM_016657995.1	XM_016657995.1	SUVR2	histone-lysine N-methyltransferase	1121-1141	2.5	GO:0005634(nucleus);GO:0005694(chromosome);GO:0005730(nucleolus);GO:0008270(zinc ion binding);GO:0009507(chloroplast);GO:0018024(histone-lysine N-methyltransferase activity);GO:0031047(gene silencing by RNA);GO:0034968(histone lysine methylation)	ko00310(Lysine degradation)
PC-3p-258597_16	XM_016604572.1	XM_016604572.1	-	-	1578-1598	2.5	GO:0016787(hydrolase activity)
PC-3p-258597_16	XM_016604839.1	XM_016604839.1	At1g79710	-	641-661	1.8	GO:0005215(transporter activity);GO:0005634(nucleus);GO:0006810(transport);GO:0016020(membrane);GO:0016021(integral component of membrane)
PC-3p-258597_16	XM_016590725.1	XM_016590725.1	At2g20020	-	2299-2320	2.5	GO:0000373(Group II intron splicing);GO:0003723(RNA binding);GO:0006397(mRNA processing);GO:0009507(chloroplast);GO:0009570(chloroplast stroma);GO:0030529(intracellular ribonucleoprotein complex)
PC-3p-258597_16	XM_016644091.1	XM_016644091.1	-	-	391-411	2.5	GO:0003674(molecular_function);GO:0005634(nucleus);GO:0008150(biological_process)
PC-3p-258597_16	XM_016659896.1	XM_016659896.1	TPX2	-	265-285	2.5	GO:0003674(molecular_function);GO:0005634(nucleus);GO:0005739(mitochondrion);GO:0005819(spindle);GO:0005874(microtubule);GO:0032147(activation of protein kinase activity);GO:0060236(regulation of mitotic spindle organization)
PC-3p-258597_16	XM_016659895.1	XM_016659895.1	TPX2	-	265-285	2.5	GO:0003674(molecular_function);GO:0005634(nucleus);GO:0005739(mitochondrion);GO:0005819(spindle);GO:0005874(microtubule);GO:0032147(activation of protein kinase activity);GO:0060236(regulation of mitotic spindle organization)
PC-3p-258597_16	XM_016607016.1	XM_016607016.1	SMC2-2	-	821-842	2.2	GO:0000796(condensin complex);GO:0005215(transporter activity);GO:0005524(ATP binding);GO:0005634(nucleus);GO:0006810(transport);GO:0007076(mitotic chromosome condensation);GO:0051301(cell division);GO:0051321(meiotic cell cycle)
PC-3p-258597_16	XM_016607015.1	XM_016607015.1	SMC2-2	-	821-842	2.2	GO:0000796(condensin complex);GO:0005215(transporter activity);GO:0005524(ATP binding);GO:0005634(nucleus);GO:0006810(transport);GO:0007076(mitotic chromosome condensation);GO:0051301(cell division);GO:0051321(meiotic cell cycle)
PC-3p-258597_16	XM_016637700.1	XM_016637700.1	ROPGAP2	-	1187-1207	2.5	GO:0005096(GTPase activator activity);GO:0005737(cytoplasm);GO:0007165(signal transduction)
PC-3p-114443_49	XM_016647464.1	XM_016647464.1	-	-	1981-2004	2.5	GO:0004674(protein serine/threonine kinase activity);GO:0005886(plasma membrane);GO:0007166(cell surface receptor signaling pathway)
PC-3p-114443_49	XM_016648481.1	XM_016648481.1	-	-	3946-3969	2.2	-
PC-3p-114443_49	XM_016595878.1	XM_016595878.1	-	-	1609-1632	2.2	GO:0003674(molecular_function);GO:0005737(cytoplasm);GO:0008150(biological_process)
PC-3p-114443_49	XM_016595877.1	XM_016595877.1	-	-	1609-1632	2.2	GO:0003674(molecular_function);GO:0005737(cytoplasm);GO:0008150(biological_process)
PC-3p-114443_49	XM_016595879.1	XM_016595879.1	-	-	1609-1632	2.2	GO:0003674(molecular_function);GO:0005737(cytoplasm);GO:0008150(biological_process)
PC-3p-114443_49	XM_016595881.1	XM_016595881.1	-	-	1609-1632	2.2	GO:0003674(molecular_function);GO:0005737(cytoplasm);GO:0008150(biological_process)
PC-3p-114443_49	XM_016651422.1	XM_016651422.1	GA2OX2	gibberellin 2-beta-dioxygenase 2-like	1307-1330	2.5	GO:0009416(response to light stimulus);GO:0045487(gibberellin catabolic process);GO:0052634(C-19 gibberellin 2-beta-dioxygenase activity)	ko00904(Diterpenoid biosynthesis)
PC-3p-114443_49	XM_016582954.1	XM_016582954.1	SPAP32A8.03c	-	630-653	2	GO:0000209(protein polyubiquitination);GO:0042787(protein ubiquitination involved in ubiquitin-dependent protein catabolic process);GO:0043161(proteasome-mediated ubiquitin-dependent protein catabolic process);GO:0061630(ubiquitin protein ligase activity)
PC-3p-114443_49	XM_016583414.1	XM_016583414.1	OBE2	-	584-607	2.5	GO:0005515(protein binding);GO:0005634(nucleus);GO:0008270(zinc ion binding);GO:0009793(embryo development ending in seed dormancy);GO:0010071(root meristem specification);GO:0010078(maintenance of root meristem identity);GO:0010468(regulation of gene expression);GO:0010492(maintenance of shoot apical meristem identity);GO:0042803(protein homodimerization activity);GO:0046740(transport of virus i…
PC-3p-114443_49	XM_016652690.1	XM_016652690.1	-	-	1405-1428	1.8	GO:0003674(molecular_function);GO:0005634(nucleus);GO:0008150(biological_process)
PC-3p-114443_49	XM_016656367.1	XM_016656367.1	polr1d	DNA-directed RNA polymerases I and III subunit RPAC2	171-194	2.5	GO:0001054(RNA polymerase I activity);GO:0001056(RNA polymerase III activity);GO:0005666(DNA-directed RNA polymerase III complex);GO:0005736(DNA-directed RNA polymerase I complex)	ko00230(Purine metabolism);ko00240(Pyrimidine metabolism);ko03020(RNA polymerase)
PC-3p-114443_49	XM_016657351.1	XM_016657351.1	At4g17486	-	73-96	2.5	GO:0003674(molecular_function);GO:0005737(cytoplasm);GO:0008150(biological_process)
PC-3p-114443_49	XM_016642612.1	XM_016642612.1	-	uncharacterized LOC102700269	2367-2390	2.2	GO:0003674(molecular_function);GO:0008150(biological_process)	ko00620(Pyruvate metabolism)
PC-3p-114443_49	XM_016642611.1	XM_016642611.1	-	uncharacterized LOC102700269	2508-2531	2.2	GO:0003674(molecular_function);GO:0008150(biological_process)	ko00620(Pyruvate metabolism)
PC-3p-114443_49	XM_016638160.1	XM_016638160.1	NLP7	-	2349-2372	1.8	GO:0003677(DNA binding);GO:0003700(transcription factor activity, sequence-specific DNA binding);GO:0005634(nucleus);GO:0006351(transcription, DNA-templated);GO:0006355(regulation of transcription, DNA-templated);GO:0009414(response to water deprivation);GO:0010118(stomatal movement);GO:0010167(response to nitrate);GO:0042128(nitrate assimilation)
PC-3p-114443_49	XM_016638161.1	XM_016638161.1	NLP7	-	2343-2366	1.8	GO:0003677(DNA binding);GO:0003700(transcription factor activity, sequence-specific DNA binding);GO:0005634(nucleus);GO:0006351(transcription, DNA-templated);GO:0006355(regulation of transcription, DNA-templated);GO:0009414(response to water deprivation);GO:0010118(stomatal movement);GO:0010167(response to nitrate);GO:0042128(nitrate assimilation)
PC-3p-146848_36	XM_016598298.1	XM_016598298.1	PLP3	-	1694-1717	2.5	GO:0004620(phospholipase activity);GO:0005737(cytoplasm);GO:0016020(membrane);GO:0047372(acylglycerol lipase activity)
stu-miR166b_1ss4GA	XM_016607622.1	XM_016607622.1	SD17	G-type lectin S-receptor-like serine/threonine-protein kinase CES101	408-428	2.2	GO:0004674(protein serine/threonine kinase activity);GO:0005886(plasma membrane);GO:0006468(protein phosphorylation);GO:0006952(defense response);GO:0009506(plasmodesma)	ko00520(Amino sugar and nucleotide sugar metabolism)
stu-miR166b_1ss4GA	XM_016578618.1	XM_016578618.1	ATHB-15	-	1437-1457	2.2	GO:0003677(DNA binding);GO:0003700(transcription factor activity, sequence-specific DNA binding);GO:0005634(nucleus);GO:0006351(transcription, DNA-templated);GO:0006355(regulation of transcription, DNA-templated);GO:0008289(lipid binding);GO:0009855(determination of bilateral symmetry);GO:0009887(organ morphogenesis);GO:0009965(leaf morphogenesis);GO:0010014(meristem initiation);GO:0010073(merist…
stu-miR166b_1ss4GA	XM_016578619.1	XM_016578619.1	ATHB-15	-	1538-1558	2.2	GO:0003677(DNA binding);GO:0003700(transcription factor activity, sequence-specific DNA binding);GO:0005634(nucleus);GO:0006351(transcription, DNA-templated);GO:0006355(regulation of transcription, DNA-templated);GO:0008289(lipid binding);GO:0009855(determination of bilateral symmetry);GO:0009887(organ morphogenesis);GO:0009965(leaf morphogenesis);GO:0010014(meristem initiation);GO:0010073(merist…
stu-miR166b_1ss4GA	XM_016578617.1	XM_016578617.1	ATHB-15	-	1538-1558	2.2	GO:0003677(DNA binding);GO:0003700(transcription factor activity, sequence-specific DNA binding);GO:0005634(nucleus);GO:0006351(transcription, DNA-templated);GO:0006355(regulation of transcription, DNA-templated);GO:0008289(lipid binding);GO:0009855(determination of bilateral symmetry);GO:0009887(organ morphogenesis);GO:0009965(leaf morphogenesis);GO:0010014(meristem initiation);GO:0010073(merist…
stu-miR166b_1ss4GA	XM_016597357.1	XM_016597357.1	HTH	protein HOTHEAD	227-246	2.5	GO:0005576(extracellular region);GO:0016614(oxidoreductase activity, acting on CH-OH group of donors);GO:0016832(aldehyde-lyase activity);GO:0050660(flavin adenine dinucleotide binding);GO:0055114(oxidation-reduction process)	ko00260(Glycine, serine and threonine metabolism)
stu-miR166b_1ss4GA	XM_016603593.1	XM_016603593.1	ATHB-15	uncharacterized LOC104455787	1451-1471	2.2	GO:0003677(DNA binding);GO:0003700(transcription factor activity, sequence-specific DNA binding);GO:0005634(nucleus);GO:0006351(transcription, DNA-templated);GO:0006355(regulation of transcription, DNA-templated);GO:0008289(lipid binding);GO:0009855(determination of bilateral symmetry);GO:0009887(organ morphogenesis);GO:0009965(leaf morphogenesis);GO:0010014(meristem initiation);GO:0010073(merist…	ko00750(Vitamin B6 metabolism)
stu-miR166b_1ss4GA	XM_016603592.1	XM_016603592.1	ATHB-15	-	1489-1509	2.2	GO:0003677(DNA binding);GO:0003700(transcription factor activity, sequence-specific DNA binding);GO:0005634(nucleus);GO:0006351(transcription, DNA-templated);GO:0006355(regulation of transcription, DNA-templated);GO:0008289(lipid binding);GO:0009855(determination of bilateral symmetry);GO:0009887(organ morphogenesis);GO:0009965(leaf morphogenesis);GO:0010014(meristem initiation);GO:0010073(merist…
stu-miR166b_1ss4GA	XM_016657470.1	XM_016657470.1	ATHB-15	-	1515-1535	2.2	GO:0003677(DNA binding);GO:0003700(transcription factor activity, sequence-specific DNA binding);GO:0005634(nucleus);GO:0006351(transcription, DNA-templated);GO:0006355(regulation of transcription, DNA-templated);GO:0008289(lipid binding);GO:0009855(determination of bilateral symmetry);GO:0009887(organ morphogenesis);GO:0009965(leaf morphogenesis);GO:0010014(meristem initiation);GO:0010073(merist…
stu-miR166b_1ss4GA	XM_016643130.1	XM_016643130.1	ATHB-15	-	1535-1555	2.2	GO:0003677(DNA binding);GO:0003700(transcription factor activity, sequence-specific DNA binding);GO:0005634(nucleus);GO:0006351(transcription, DNA-templated);GO:0006355(regulation of transcription, DNA-templated);GO:0008289(lipid binding);GO:0009855(determination of bilateral symmetry);GO:0009887(organ morphogenesis);GO:0009965(leaf morphogenesis);GO:0010014(meristem initiation);GO:0010073(merist…
stu-miR166b_1ss4GA	XM_016605851.1	XM_016605851.1	AKR4C10	aldo-keto reductase family 4 member C9-like	590-609	2	GO:0005634(nucleus);GO:0005737(cytoplasm);GO:0005829(cytosol);GO:0016491(oxidoreductase activity);GO:0055114(oxidation-reduction process)	ko00040(Pentose and glucuronate interconversions);ko00051(Fructose and mannose metabolism);ko00052(Galactose metabolism);ko00561(Glycerolipid metabolism)
PC-5p-216933_21	XM_016631369.1	XM_016631369.1	-	-	1959-1978	2.5	-
csi-miR160c-5p_R+1_1ss19CT	XM_016592446.1	XM_016592446.1	ARF18	ADP-ribosylation factor 1	128-149	1	GO:0003677(DNA binding);GO:0003700(transcription factor activity, sequence-specific DNA binding);GO:0005634(nucleus);GO:0006351(transcription, DNA-templated);GO:0006355(regulation of transcription, DNA-templated);GO:0007389(pattern specification process);GO:0009733(response to auxin);GO:0009734(auxin-activated signaling pathway);GO:0035198(miRNA binding);GO:0048829(root cap development);GO:005130…	ko04075(Plant hormone signal transduction)
csi-miR160c-5p_R+1_1ss19CT	XM_016578085.1	XM_016578085.1	ARF22	auxin response factor 7-like	1608-1629	2	GO:0003677(DNA binding);GO:0003700(transcription factor activity, sequence-specific DNA binding);GO:0005634(nucleus);GO:0006351(transcription, DNA-templated);GO:0006355(regulation of transcription, DNA-templated);GO:0007389(pattern specification process);GO:0009734(auxin-activated signaling pathway);GO:0009738(abscisic acid-activated signaling pathway);GO:0009743(response to carbohydrate);GO:0010…	ko04075(Plant hormone signal transduction)
csi-miR160c-5p_R+1_1ss19CT	XM_016578082.1	XM_016578082.1	ARF22	auxin response factor 7-like	1496-1517	2	GO:0003677(DNA binding);GO:0003700(transcription factor activity, sequence-specific DNA binding);GO:0005634(nucleus);GO:0006351(transcription, DNA-templated);GO:0006355(regulation of transcription, DNA-templated);GO:0007389(pattern specification process);GO:0009734(auxin-activated signaling pathway);GO:0009738(abscisic acid-activated signaling pathway);GO:0009743(response to carbohydrate);GO:0010…	ko04075(Plant hormone signal transduction)
csi-miR160c-5p_R+1_1ss19CT	XM_016578084.1	XM_016578084.1	ARF22	auxin response factor 7-like	1456-1477	2	GO:0003677(DNA binding);GO:0003700(transcription factor activity, sequence-specific DNA binding);GO:0005634(nucleus);GO:0006351(transcription, DNA-templated);GO:0006355(regulation of transcription, DNA-templated);GO:0007389(pattern specification process);GO:0009734(auxin-activated signaling pathway);GO:0009738(abscisic acid-activated signaling pathway);GO:0009743(response to carbohydrate);GO:0010…	ko04075(Plant hormone signal transduction)
csi-miR160c-5p_R+1_1ss19CT	XM_016578083.1	XM_016578083.1	ARF22	auxin response factor 7-like	1538-1559	2	GO:0003677(DNA binding);GO:0003700(transcription factor activity, sequence-specific DNA binding);GO:0005634(nucleus);GO:0006351(transcription, DNA-templated);GO:0006355(regulation of transcription, DNA-templated);GO:0007389(pattern specification process);GO:0009734(auxin-activated signaling pathway);GO:0009738(abscisic acid-activated signaling pathway);GO:0009743(response to carbohydrate);GO:0010…	ko04075(Plant hormone signal transduction)
csi-miR160c-5p_R+1_1ss19CT	XM_016578081.1	XM_016578081.1	ARF22	auxin response factor 7-like	1543-1564	2	GO:0003677(DNA binding);GO:0003700(transcription factor activity, sequence-specific DNA binding);GO:0005634(nucleus);GO:0006351(transcription, DNA-templated);GO:0006355(regulation of transcription, DNA-templated);GO:0007389(pattern specification process);GO:0009734(auxin-activated signaling pathway);GO:0009738(abscisic acid-activated signaling pathway);GO:0009743(response to carbohydrate);GO:0010…	ko04075(Plant hormone signal transduction)
csi-miR160c-5p_R+1_1ss19CT	XM_016578086.1	XM_016578086.1	ARF22	auxin response factor 7-like	1546-1567	2	GO:0003677(DNA binding);GO:0003700(transcription factor activity, sequence-specific DNA binding);GO:0005634(nucleus);GO:0006351(transcription, DNA-templated);GO:0006355(regulation of transcription, DNA-templated);GO:0007389(pattern specification process);GO:0009734(auxin-activated signaling pathway);GO:0009738(abscisic acid-activated signaling pathway);GO:0009743(response to carbohydrate);GO:0010…	ko04075(Plant hormone signal transduction)
csi-miR160c-5p_R+1_1ss19CT	XM_016649082.1	XM_016649082.1	At1g65750	uncharacterized LOC106392594	2910-2931	1.5	GO:0003676(nucleic acid binding);GO:0003723(RNA binding);GO:0003964(RNA-directed DNA polymerase activity);GO:0005739(mitochondrion);GO:0006278(RNA-dependent DNA biosynthetic process)	ko01210(2-Oxocarboxylic acid metabolism);ko01230(Biosynthesis of amino acids);ko00220(Arginine biosynthesis)
csi-miR160c-5p_R+1_1ss19CT	XM_016628558.1	XM_016628558.1	-	-	1388-1409	2.2	-
csi-miR160c-5p_R+1_1ss19CT	XM_016584484.1	XM_016584484.1	ARF17	auxin response factor 3	1443-1464	1.8	GO:0000987(core promoter proximal region sequence-specific DNA binding);GO:0003700(transcription factor activity, sequence-specific DNA binding);GO:0005634(nucleus);GO:0006351(transcription, DNA-templated);GO:0006355(regulation of transcription, DNA-templated);GO:0009555(pollen development);GO:0009653(anatomical structure morphogenesis);GO:0009734(auxin-activated signaling pathway);GO:0010208(pol…	ko04075(Plant hormone signal transduction)
csi-miR160c-5p_R+1_1ss19CT	XM_016585764.1	XM_016585764.1	ARF17	auxin response factor 3	1449-1470	1.8	GO:0000987(core promoter proximal region sequence-specific DNA binding);GO:0003700(transcription factor activity, sequence-specific DNA binding);GO:0005634(nucleus);GO:0006351(transcription, DNA-templated);GO:0006355(regulation of transcription, DNA-templated);GO:0009555(pollen development);GO:0009653(anatomical structure morphogenesis);GO:0009734(auxin-activated signaling pathway);GO:0010208(pol…	ko04075(Plant hormone signal transduction)
csi-miR160c-5p_R+1_1ss19CT	XM_016616661.1	XM_016616661.1	ARF22	auxin response factor 7-like	1483-1504	2	GO:0003677(DNA binding);GO:0003700(transcription factor activity, sequence-specific DNA binding);GO:0005634(nucleus);GO:0006351(transcription, DNA-templated);GO:0006355(regulation of transcription, DNA-templated);GO:0007389(pattern specification process);GO:0009734(auxin-activated signaling pathway);GO:0009738(abscisic acid-activated signaling pathway);GO:0009743(response to carbohydrate);GO:0010…	ko04075(Plant hormone signal transduction)
csi-miR160c-5p_R+1_1ss19CT	XM_016616660.1	XM_016616660.1	ARF22	auxin response factor 7-like	1597-1618	2	GO:0003677(DNA binding);GO:0003700(transcription factor activity, sequence-specific DNA binding);GO:0005634(nucleus);GO:0006351(transcription, DNA-templated);GO:0006355(regulation of transcription, DNA-templated);GO:0007389(pattern specification process);GO:0009734(auxin-activated signaling pathway);GO:0009738(abscisic acid-activated signaling pathway);GO:0009743(response to carbohydrate);GO:0010…	ko04075(Plant hormone signal transduction)
csi-miR160c-5p_R+1_1ss19CT	XM_016616659.1	XM_016616659.1	ARF22	auxin response factor 7-like	1706-1727	2	GO:0003677(DNA binding);GO:0003700(transcription factor activity, sequence-specific DNA binding);GO:0005634(nucleus);GO:0006351(transcription, DNA-templated);GO:0006355(regulation of transcription, DNA-templated);GO:0007389(pattern specification process);GO:0009734(auxin-activated signaling pathway);GO:0009738(abscisic acid-activated signaling pathway);GO:0009743(response to carbohydrate);GO:0010…	ko04075(Plant hormone signal transduction)
csi-miR160c-5p_R+1_1ss19CT	XM_016616658.1	XM_016616658.1	ARF22	auxin response factor 7-like	1750-1771	2	GO:0003677(DNA binding);GO:0003700(transcription factor activity, sequence-specific DNA binding);GO:0005634(nucleus);GO:0006351(transcription, DNA-templated);GO:0006355(regulation of transcription, DNA-templated);GO:0007389(pattern specification process);GO:0009734(auxin-activated signaling pathway);GO:0009738(abscisic acid-activated signaling pathway);GO:0009743(response to carbohydrate);GO:0010…	ko04075(Plant hormone signal transduction)
csi-miR160c-5p_R+1_1ss19CT	XM_016616657.1	XM_016616657.1	ARF22	auxin response factor 7-like	1836-1857	2	GO:0003677(DNA binding);GO:0003700(transcription factor activity, sequence-specific DNA binding);GO:0005634(nucleus);GO:0006351(transcription, DNA-templated);GO:0006355(regulation of transcription, DNA-templated);GO:0007389(pattern specification process);GO:0009734(auxin-activated signaling pathway);GO:0009738(abscisic acid-activated signaling pathway);GO:0009743(response to carbohydrate);GO:0010…	ko04075(Plant hormone signal transduction)
csi-miR160c-5p_R+1_1ss19CT	XM_016586695.1	XM_016586695.1	ARF18	auxin response factor 18-like	2-23	2	GO:0003677(DNA binding);GO:0003700(transcription factor activity, sequence-specific DNA binding);GO:0005634(nucleus);GO:0006351(transcription, DNA-templated);GO:0006355(regulation of transcription, DNA-templated);GO:0007389(pattern specification process);GO:0009733(response to auxin);GO:0009734(auxin-activated signaling pathway);GO:0035198(miRNA binding);GO:0048829(root cap development);GO:005130…	ko04075(Plant hormone signal transduction)
csi-miR160c-5p_R+1_1ss19CT	XM_016640136.1	XM_016640136.1	ARF18	hypothetical protein	1841-1862	2	GO:0003677(DNA binding);GO:0003700(transcription factor activity, sequence-specific DNA binding);GO:0005634(nucleus);GO:0006351(transcription, DNA-templated);GO:0006355(regulation of transcription, DNA-templated);GO:0007389(pattern specification process);GO:0009734(auxin-activated signaling pathway);GO:0009738(abscisic acid-activated signaling pathway);GO:0009743(response to carbohydrate);GO:0010…	ko04075(Plant hormone signal transduction)
csi-miR160c-5p_R+1_1ss19CT	XM_016640135.1	XM_016640135.1	ARF18	hypothetical protein	1632-1653	2	GO:0003677(DNA binding);GO:0003700(transcription factor activity, sequence-specific DNA binding);GO:0005634(nucleus);GO:0006351(transcription, DNA-templated);GO:0006355(regulation of transcription, DNA-templated);GO:0007389(pattern specification process);GO:0009734(auxin-activated signaling pathway);GO:0009738(abscisic acid-activated signaling pathway);GO:0009743(response to carbohydrate);GO:0010…	ko04075(Plant hormone signal transduction)
csi-miR160c-5p_R+1_1ss19CT	XM_016640134.1	XM_016640134.1	ARF18	hypothetical protein	1896-1917	2	GO:0003677(DNA binding);GO:0003700(transcription factor activity, sequence-specific DNA binding);GO:0005634(nucleus);GO:0006351(transcription, DNA-templated);GO:0006355(regulation of transcription, DNA-templated);GO:0007389(pattern specification process);GO:0009734(auxin-activated signaling pathway);GO:0009738(abscisic acid-activated signaling pathway);GO:0009743(response to carbohydrate);GO:0010…	ko04075(Plant hormone signal transduction)
csi-miR160c-5p_R+1_1ss19CT	XM_016602462.1	XM_016602462.1	ARF22	ADP-ribosylation factor 1	1574-1595	1	GO:0003677(DNA binding);GO:0003700(transcription factor activity, sequence-specific DNA binding);GO:0005634(nucleus);GO:0006351(transcription, DNA-templated);GO:0006355(regulation of transcription, DNA-templated);GO:0007389(pattern specification process);GO:0009733(response to auxin);GO:0009734(auxin-activated signaling pathway);GO:0035198(miRNA binding);GO:0048829(root cap development);GO:005130…	ko04075(Plant hormone signal transduction)
csi-miR160c-5p_R+1_1ss19CT	XM_016655248.1	XM_016655248.1	ARF18	auxin response factor 7-like	1917-1938	1	GO:0003677(DNA binding);GO:0003700(transcription factor activity, sequence-specific DNA binding);GO:0005634(nucleus);GO:0006351(transcription, DNA-templated);GO:0006355(regulation of transcription, DNA-templated);GO:0007389(pattern specification process);GO:0009734(auxin-activated signaling pathway);GO:0009738(abscisic acid-activated signaling pathway);GO:0009743(response to carbohydrate);GO:0010…	ko04075(Plant hormone signal transduction)
csi-miR160c-5p_R+1_1ss19CT	XM_016655249.1	XM_016655249.1	ARF18	auxin response factor 7-like	1496-1517	1	GO:0003677(DNA binding);GO:0003700(transcription factor activity, sequence-specific DNA binding);GO:0005634(nucleus);GO:0006351(transcription, DNA-templated);GO:0006355(regulation of transcription, DNA-templated);GO:0007389(pattern specification process);GO:0009734(auxin-activated signaling pathway);GO:0009738(abscisic acid-activated signaling pathway);GO:0009743(response to carbohydrate);GO:0010…	ko04075(Plant hormone signal transduction)
csi-miR160c-5p_R+1_1ss19CT	XM_016655250.1	XM_016655250.1	ARF18	auxin response factor 7-like	1475-1496	1	GO:0003677(DNA binding);GO:0003700(transcription factor activity, sequence-specific DNA binding);GO:0005634(nucleus);GO:0006351(transcription, DNA-templated);GO:0006355(regulation of transcription, DNA-templated);GO:0007389(pattern specification process);GO:0009734(auxin-activated signaling pathway);GO:0009738(abscisic acid-activated signaling pathway);GO:0009743(response to carbohydrate);GO:0010…	ko04075(Plant hormone signal transduction)
csi-miR160c-5p_R+1_1ss19CT	XM_016641934.1	XM_016641934.1	ARF22	auxin response factor 7-like	2152-2173	2	GO:0003677(DNA binding);GO:0003700(transcription factor activity, sequence-specific DNA binding);GO:0005634(nucleus);GO:0006351(transcription, DNA-templated);GO:0006355(regulation of transcription, DNA-templated);GO:0007389(pattern specification process);GO:0009733(response to auxin);GO:0009734(auxin-activated signaling pathway);GO:0035198(miRNA binding);GO:0048829(root cap development);GO:005130…	ko04075(Plant hormone signal transduction)
csi-miR160c-5p_R+1_1ss19CT	XM_016641933.1	XM_016641933.1	ARF18	auxin response factor 7-like	2149-2170	2	GO:0003677(DNA binding);GO:0003700(transcription factor activity, sequence-specific DNA binding);GO:0005634(nucleus);GO:0006351(transcription, DNA-templated);GO:0006355(regulation of transcription, DNA-templated);GO:0007389(pattern specification process);GO:0009733(response to auxin);GO:0009734(auxin-activated signaling pathway);GO:0035198(miRNA binding);GO:0048829(root cap development);GO:005130…	ko04075(Plant hormone signal transduction)
csi-miR160c-5p_R+1_1ss19CT	XM_016657185.1	XM_016657185.1	At1g65750	uncharacterized LOC106392594	4669-4690	0.8	GO:0003676(nucleic acid binding);GO:0003723(RNA binding);GO:0003964(RNA-directed DNA polymerase activity);GO:0005739(mitochondrion);GO:0006278(RNA-dependent DNA biosynthetic process)	ko01210(2-Oxocarboxylic acid metabolism);ko01230(Biosynthesis of amino acids);ko00220(Arginine biosynthesis)
csi-miR160c-5p_R+1_1ss19CT	XM_016657185.1	XM_016657185.1	At1g65750	uncharacterized LOC106392594	4574-4596	2.5	GO:0003676(nucleic acid binding);GO:0003723(RNA binding);GO:0003964(RNA-directed DNA polymerase activity);GO:0005739(mitochondrion);GO:0006278(RNA-dependent DNA biosynthetic process)	ko01210(2-Oxocarboxylic acid metabolism);ko01230(Biosynthesis of amino acids);ko00220(Arginine biosynthesis)
csi-miR160c-5p_R+1_1ss19CT	XM_016589514.1	XM_016589514.1	ARF16	auxin response factor 7-like	1681-1702	1	GO:0003677(DNA binding);GO:0003700(transcription factor activity, sequence-specific DNA binding);GO:0005634(nucleus);GO:0006351(transcription, DNA-templated);GO:0006355(regulation of transcription, DNA-templated);GO:0007389(pattern specification process);GO:0009733(response to auxin);GO:0009734(auxin-activated signaling pathway);GO:0035198(miRNA binding);GO:0048829(root cap development);GO:005130…	ko04075(Plant hormone signal transduction)
csi-miR160c-5p_R+1_1ss19CT	XM_016589515.1	XM_016589515.1	ARF16	auxin response factor 7-like	1525-1546	1	GO:0003677(DNA binding);GO:0003700(transcription factor activity, sequence-specific DNA binding);GO:0005634(nucleus);GO:0006351(transcription, DNA-templated);GO:0006355(regulation of transcription, DNA-templated);GO:0007389(pattern specification process);GO:0009733(response to auxin);GO:0009734(auxin-activated signaling pathway);GO:0035198(miRNA binding);GO:0048829(root cap development);GO:005130…	ko04075(Plant hormone signal transduction)
csi-miR160c-5p_R+1_1ss19CT	XM_016620081.1	XM_016620081.1	ARF18	auxin response factor 7-like	2176-2197	2	GO:0003677(DNA binding);GO:0003700(transcription factor activity, sequence-specific DNA binding);GO:0005634(nucleus);GO:0006351(transcription, DNA-templated);GO:0006355(regulation of transcription, DNA-templated);GO:0007389(pattern specification process);GO:0009733(response to auxin);GO:0009734(auxin-activated signaling pathway);GO:0035198(miRNA binding);GO:0048829(root cap development);GO:005130…	ko04075(Plant hormone signal transduction)
csi-miR160c-5p_R+1_1ss19CT	XM_016620080.1	XM_016620080.1	ARF18	auxin response factor 7-like	2173-2194	2	GO:0003677(DNA binding);GO:0003700(transcription factor activity, sequence-specific DNA binding);GO:0005634(nucleus);GO:0006351(transcription, DNA-templated);GO:0006355(regulation of transcription, DNA-templated);GO:0007389(pattern specification process);GO:0009733(response to auxin);GO:0009734(auxin-activated signaling pathway);GO:0035198(miRNA binding);GO:0048829(root cap development);GO:005130…	ko04075(Plant hormone signal transduction)
PC-5p-298501_13	XM_016600571.1	XM_016600571.1	-	-	813-832	2.2	GO:0005634(nucleus);GO:0008150(biological_process)
PC-5p-298501_13	XM_016600572.1	XM_016600572.1	-	-	495-514	2.2	GO:0005634(nucleus);GO:0008150(biological_process)
PC-5p-298501_13	XM_016600573.1	XM_016600573.1	-	-	453-472	2.2	GO:0005634(nucleus);GO:0008150(biological_process)
PC-5p-298501_13	XM_016638522.1	XM_016638522.1	-	-	262-281	2.5	GO:0005739(mitochondrion);GO:0006810(transport);GO:0016021(integral component of membrane)
PC-5p-298501_13	XM_016640817.1	XM_016640817.1	-	-	417-436	2.5	GO:0003674(molecular_function);GO:0005634(nucleus);GO:0008150(biological_process)
PC-5p-298501_13	XM_016659402.1	XM_016659402.1	-	-	939-958	2.5	GO:0005739(mitochondrion);GO:0006810(transport);GO:0016021(integral component of membrane)

## Sheet: downregulated miRNAs
Table S4. The annotation of genes targeted by downregulated miRNAs.
miRNA ID	Transcript ID	Gene ID	Symbol	Gene Annotation	Range	Score	GO	KEGG
PC-5p-50806_114	XM_016655655.1	XM_016655655.1	ABCG36	ATP-binding cassette transporter, subfamily G, member 12, group WBC protein PpABCG12	2737-2757	2.5	GO:0005886(plasma membrane);GO:0016021(integral component of membrane);GO:0042626(ATPase activity, coupled to transmembrane movement of substances)	ko02010(ABC transporters)
PC-5p-50806_114	XM_016612175.1	XM_016612175.1	Gspt1	eukaryotic peptide chain release factor GTP-binding subunit ERF3A	56-76	2.5	GO:0002184(cytoplasmic translational termination);GO:0003747(translation release factor activity);GO:0003924(GTPase activity);GO:0018444(translation release factor complex)	ko03015(mRNA surveillance pathway)
PC-5p-50806_114	XM_016612171.1	XM_016612171.1	Gspt1	eukaryotic peptide chain release factor GTP-binding subunit ERF3A	56-76	2.5	GO:0002184(cytoplasmic translational termination);GO:0003747(translation release factor activity);GO:0003924(GTPase activity);GO:0018444(translation release factor complex)	ko03015(mRNA surveillance pathway)
PC-5p-50806_114	XM_016604116.1	XM_016604116.1	SDM1_58t00016	-	53-72	2.5	GO:0005515(protein binding);GO:0005739(mitochondrion);GO:0005886(plasma membrane);GO:0007043(cell-cell junction assembly);GO:0016021(integral component of membrane);GO:0042545(cell wall modification);GO:0042803(protein homodimerization activity);GO:0048226(Casparian strip)
PC-5p-50806_114	XM_016659296.1	XM_016659296.1	ABCG36	ATP-binding cassette transporter, subfamily G, member 12, group WBC protein PpABCG12	2737-2757	2.5	GO:0005886(plasma membrane);GO:0016021(integral component of membrane);GO:0042626(ATPase activity, coupled to transmembrane movement of substances)	ko02010(ABC transporters)
PC-5p-135574_40	XM_016595960.1	XM_016595960.1	ASP1	-	209-229	2.5	GO:0004190(aspartic-type endopeptidase activity);GO:0006508(proteolysis);GO:0030163(protein catabolic process)
PC-5p-135574_40	XM_016580547.1	XM_016580547.1	ASP1	-	387-407	2.5	GO:0004190(aspartic-type endopeptidase activity);GO:0006508(proteolysis);GO:0030163(protein catabolic process)
PC-5p-135574_40	XM_016580548.1	XM_016580548.1	ASP1	-	388-408	2.5	GO:0004190(aspartic-type endopeptidase activity);GO:0006508(proteolysis);GO:0030163(protein catabolic process)
PC-5p-135574_40	XM_016580546.1	XM_016580546.1	ASP1	-	388-408	2.5	GO:0004190(aspartic-type endopeptidase activity);GO:0006508(proteolysis);GO:0030163(protein catabolic process)
PC-5p-135574_40	XM_016580549.1	XM_016580549.1	ASP1	-	388-408	2.5	GO:0004190(aspartic-type endopeptidase activity);GO:0006508(proteolysis);GO:0030163(protein catabolic process)
PC-5p-135574_40	XM_016580545.1	XM_016580545.1	ASP1	-	388-408	2.5	GO:0004190(aspartic-type endopeptidase activity);GO:0006508(proteolysis);GO:0030163(protein catabolic process)
PC-5p-135574_40	XM_016600481.1	XM_016600481.1	-	-	572-592	2.5	GO:0006979(response to oxidative stress);GO:0016020(membrane)
PC-5p-135574_40	XM_016632193.1	XM_016632193.1	ASP1	-	308-328	2.5	GO:0004190(aspartic-type endopeptidase activity);GO:0006508(proteolysis);GO:0030163(protein catabolic process)
PC-5p-135574_40	XM_016640448.1	XM_016640448.1	ATJ13	DnaJ-like protein subfamily B member 11	805-825	2.2	GO:0005515(protein binding);GO:0006457(protein folding);GO:0009507(chloroplast);GO:0009536(plastid);GO:0009644(response to high light intensity);GO:0010228(vegetative to reproductive phase transition of meristem);GO:0016021(integral component of membrane);GO:0055122(response to very low light intensity stimulus)	ko04141(Protein processing in endoplasmic reticulum)
PC-5p-135574_40	XM_016640449.1	XM_016640449.1	ATJ13	DnaJ-like protein subfamily B member 11	804-824	2.2	GO:0005515(protein binding);GO:0006457(protein folding);GO:0009507(chloroplast);GO:0009536(plastid);GO:0009644(response to high light intensity);GO:0010228(vegetative to reproductive phase transition of meristem);GO:0016021(integral component of membrane);GO:0055122(response to very low light intensity stimulus)	ko04141(Protein processing in endoplasmic reticulum)
hbr-MIR6173-p5_2ss17AG18GC	XM_016577153.1				385-402	2.5	-
hbr-MIR6173-p5_2ss17AG18GC	XM_016608675.1	XM_016608675.1	PTAC10	-	1763-1780	2.2	GO:0003676(nucleic acid binding);GO:0005515(protein binding);GO:0005634(nucleus);GO:0005829(cytosol);GO:0009295(nucleoid);GO:0009507(chloroplast);GO:0009508(plastid chromosome);GO:0009570(chloroplast stroma)
hbr-MIR6173-p5_2ss17AG18GC	XM_016647028.1	XM_016647028.1	-	-	1238-1255	2.5	-
hbr-MIR6173-p5_2ss17AG18GC	XM_016647041.1	XM_016647041.1	ADH1	alcohol dehydrogenase 1	800-817	2.5	GO:0001666(response to hypoxia);GO:0004022(alcohol dehydrogenase );GO:0005737(cytoplasm);GO:0005794(Golgi apparatus);GO:0005829(cytosol);GO:0005886(plasma membrane);GO:0006970(response to osmotic stress);GO:0008270(zinc ion binding);GO:0009409(response to cold);GO:0009413(response to flooding);GO:0009414(response to water deprivation);GO:0009651(response to salt stress);GO:0009737(response to abs…	ko00010(Glycolysis / Gluconeogenesis);ko00071(Fatty acid degradation);ko00592(alpha-Linolenic acid metabolism);ko00350(Tyrosine metabolism)
hbr-MIR6173-p5_2ss17AG18GC	XM_016610595.1	XM_016610595.1	KCS4	3-ketoacyl-CoA synthase 4	145-162	2.5	GO:0000038(very long-chain fatty acid metabolic process);GO:0005634(nucleus);GO:0006633(fatty acid biosynthetic process);GO:0016021(integral component of membrane);GO:0016747(transferase activity, transferring acyl groups other than amino-acyl groups);GO:0042335(cuticle development)	ko00062(Fatty acid elongation)
hbr-MIR6173-p5_2ss17AG18GC	XM_016579781.1	XM_016579781.1	PTAC10	-	206-223	2.2	GO:0003676(nucleic acid binding);GO:0005515(protein binding);GO:0005634(nucleus);GO:0005829(cytosol);GO:0009295(nucleoid);GO:0009507(chloroplast);GO:0009508(plastid chromosome);GO:0009570(chloroplast stroma)
hbr-MIR6173-p5_2ss17AG18GC	XM_016611049.1	XM_016611049.1	Tf2-12	U-box domain-containing protein 72-like	603-620	1.5	GO:0003677(DNA binding);GO:0003887(DNA-directed DNA polymerase activity);GO:0003964(RNA-directed DNA polymerase activity);GO:0004190(aspartic-type endopeptidase activity);GO:0004519(endonuclease activity);GO:0005634(nucleus);GO:0006310(DNA recombination);GO:0006508(proteolysis);GO:0015074(DNA integration);GO:0046872(metal ion binding)	ko03040(Spliceosome);ko04120(Ubiquitin mediated proteolysis)
hbr-MIR6173-p5_2ss17AG18GC	XM_016580121.1	XM_016580121.1	ATPK2	serine/threonine-protein kinase ATG1a	165-182	2.5	GO:0004674(protein serine/threonine kinase activity);GO:0005634(nucleus);GO:0005737(cytoplasm);GO:0035556(intracellular signal transduction)	ko04140(Regulation of autophagy)
hbr-MIR6173-p5_2ss17AG18GC	XM_016589024.1	XM_016589024.1	dadD	guanine deaminase	600-617	2.2	GO:0004000(adenosine deaminase activity);GO:0019700(organic phosphonate catabolic process);GO:0050270(S-adenosylhomocysteine deaminase activity)	ko00230(Purine metabolism)
hbr-MIR6173-p5_2ss17AG18GC	XM_016589027.1	XM_016589027.1	dadD	guanine deaminase	600-617	2.2	GO:0004000(adenosine deaminase activity);GO:0019700(organic phosphonate catabolic process);GO:0050270(S-adenosylhomocysteine deaminase activity)	ko00230(Purine metabolism)
hbr-MIR6173-p5_2ss17AG18GC	XM_016581785.1	XM_016581785.1	DDB1	DNA damage-binding protein 1	2560-2577	1.2	GO:0003684(damaged DNA binding);GO:0005634(nucleus);GO:0006289(nucleotide-excision repair);GO:0031461(cullin-RING ubiquitin ligase complex);GO:0043161(proteasome-mediated ubiquitin-dependent protein catabolic process)	ko04120(Ubiquitin mediated proteolysis);ko03420(Nucleotide excision repair)
hbr-MIR6173-p5_2ss17AG18GC	XM_016629291.1	XM_016629291.1	dadD	hypothetical protein	753-770	2.2	GO:0004000(adenosine deaminase activity);GO:0019700(organic phosphonate catabolic process);GO:0050270(S-adenosylhomocysteine deaminase activity)	ko00230(Purine metabolism)
hbr-MIR6173-p5_2ss17AG18GC	XM_016629292.1	XM_016629292.1	dadD	hypothetical protein	810-827	2.2	GO:0004000(adenosine deaminase activity);GO:0019700(organic phosphonate catabolic process);GO:0050270(S-adenosylhomocysteine deaminase activity)	ko00230(Purine metabolism)
hbr-MIR6173-p5_2ss17AG18GC	XM_016629290.1	XM_016629290.1	dadD	hypothetical protein	816-833	2.2	GO:0004000(adenosine deaminase activity);GO:0019700(organic phosphonate catabolic process);GO:0050270(S-adenosylhomocysteine deaminase activity)	ko00230(Purine metabolism)
hbr-MIR6173-p5_2ss17AG18GC	XM_016629293.1	XM_016629293.1	mtaD	-	816-833	2.2	GO:0004000(adenosine deaminase activity);GO:0019700(organic phosphonate catabolic process);GO:0050270(S-adenosylhomocysteine deaminase activity)
hbr-MIR6173-p5_2ss17AG18GC	XM_016583748.1	XM_016583748.1	smndc1	survival of motor neuron-related-splicing factor 30	589-606	2.5	GO:0003723(RNA binding);GO:0005634(nucleus);GO:0005737(cytoplasm);GO:0006397(mRNA processing)	ko03040(Spliceosome)
hbr-MIR6173-p5_2ss17AG18GC	XM_016622747.1	XM_016622747.1	IREH1	serine/threonine-protein kinase ATG1-like	2030-2047	2.2	GO:0004674(protein serine/threonine kinase activity);GO:0005622(intracellular);GO:0018105(peptidyl-serine phosphorylation);GO:0035556(intracellular signal transduction)	ko04140(Regulation of autophagy)
hbr-MIR6173-p5_2ss17AG18GC	XM_016622755.1	XM_016622755.1	IREH1	serine/threonine-protein kinase ATG1-like	2033-2050	2.2	GO:0004674(protein serine/threonine kinase activity);GO:0005622(intracellular);GO:0018105(peptidyl-serine phosphorylation);GO:0035556(intracellular signal transduction)	ko04140(Regulation of autophagy)
hbr-MIR6173-p5_2ss17AG18GC	XM_016600009.1	XM_016600009.1	ATPK2	serine/threonine-protein kinase ATG1a	148-165	2.5	GO:0004674(protein serine/threonine kinase activity);GO:0005634(nucleus);GO:0005737(cytoplasm);GO:0035556(intracellular signal transduction)	ko04140(Regulation of autophagy)
hbr-MIR6173-p5_2ss17AG18GC	XM_016631545.1	XM_016631545.1	At3g02490	-	599-616	2.5	GO:0003674(molecular_function);GO:0005739(mitochondrion);GO:0008150(biological_process)
hbr-MIR6173-p5_2ss17AG18GC	XM_016616954.1	XM_016616954.1	STR15	-	635-652	2.2	GO:0005515(protein binding)
hbr-MIR6173-p5_2ss17AG18GC	XM_016587749.1	XM_016587749.1	IREH1	serine/threonine-protein kinase ATG1-like	1960-1977	2.2	GO:0004674(protein serine/threonine kinase activity);GO:0005622(intracellular);GO:0018105(peptidyl-serine phosphorylation);GO:0035556(intracellular signal transduction)	ko04140(Regulation of autophagy)
hbr-MIR6173-p5_2ss17AG18GC	XM_016604226.1	XM_016604226.1	At1g74460	geranylgeranyl diphosphate reductase	1072-1089	2.2	GO:0005576(extracellular region);GO:0016042(lipid catabolic process);GO:0016788(hydrolase activity, acting on ester bonds);GO:0052689(carboxylic ester hydrolase activity)	ko00860(Porphyrin and chlorophyll metabolism);ko00900(Terpenoid backbone biosynthesis)
hbr-MIR6173-p5_2ss17AG18GC	XM_016634713.1	XM_016634713.1	-	-	762-779	2.5	-
hbr-MIR6173-p5_2ss17AG18GC	XM_016605244.1	XM_016605244.1	KCS4	3-ketoacyl-CoA synthase 4	1230-1247	2.5	GO:0000038(very long-chain fatty acid metabolic process);GO:0005634(nucleus);GO:0006633(fatty acid biosynthetic process);GO:0016021(integral component of membrane);GO:0016747(transferase activity, transferring acyl groups other than amino-acyl groups);GO:0042335(cuticle development)	ko00062(Fatty acid elongation)
hbr-MIR6173-p5_2ss17AG18GC	XM_016605246.1	XM_016605246.1	KCS4	3-ketoacyl-CoA synthase 4	1239-1256	2.5	GO:0000038(very long-chain fatty acid metabolic process);GO:0005634(nucleus);GO:0006633(fatty acid biosynthetic process);GO:0016021(integral component of membrane);GO:0016747(transferase activity, transferring acyl groups other than amino-acyl groups);GO:0042335(cuticle development)	ko00062(Fatty acid elongation)
hbr-MIR6173-p5_2ss17AG18GC	XM_016605245.1	XM_016605245.1	KCS4	3-ketoacyl-CoA synthase 4	1230-1247	2.5	GO:0000038(very long-chain fatty acid metabolic process);GO:0005634(nucleus);GO:0006633(fatty acid biosynthetic process);GO:0016021(integral component of membrane);GO:0016747(transferase activity, transferring acyl groups other than amino-acyl groups);GO:0042335(cuticle development)	ko00062(Fatty acid elongation)
hbr-MIR6173-p5_2ss17AG18GC	XM_016620346.1	XM_016620346.1	ACC1	acetyl-CoA carboxylase 1-like	1279-1296	0.5	GO:0003989(acetyl-CoA carboxylase activity);GO:0004075(biotin carboxylase activity);GO:0005524(ATP binding);GO:0005737(cytoplasm);GO:0005829(cytosol);GO:0005886(plasma membrane);GO:0009631(cold acclimation);GO:0009735(response to cytokinin);GO:0009793(embryo development ending in seed dormancy);GO:0009933(meristem structural organization);GO:0010072(primary shoot apical meristem specification);GO…	ko01212(Fatty acid metabolism);ko00620(Pyruvate metabolism);ko00640(Propanoate metabolism);ko00061(Fatty acid biosynthesis);ko00254(Aflatoxin biosynthesis)
hbr-MIR6173-p5_2ss17AG18GC	XM_016658271.1	XM_016658271.1	BPA1	-	798-815	2.5	GO:0000166(nucleotide binding);GO:0003676(nucleic acid binding);GO:0005634(nucleus);GO:0005829(cytosol);GO:0009735(response to cytokinin)
hbr-MIR6173-p5_2ss17AG18GC	XM_016658269.1	XM_016658269.1	BPA1	-	860-877	2.5	GO:0000166(nucleotide binding);GO:0003676(nucleic acid binding);GO:0005634(nucleus);GO:0005829(cytosol);GO:0009735(response to cytokinin)
hbr-MIR6173-p5_2ss17AG18GC	XM_016658270.1	XM_016658270.1	BPA1	-	913-930	2.5	GO:0000166(nucleotide binding);GO:0003676(nucleic acid binding);GO:0005634(nucleus);GO:0005829(cytosol);GO:0009735(response to cytokinin)
hbr-MIR6173-p5_2ss17AG18GC	XM_016621059.1	XM_016621059.1	-	-	1477-1494	2.5	GO:0003674(molecular_function);GO:0005886(plasma membrane);GO:0016021(integral component of membrane)
hbr-MIR6173-p5_2ss17AG18GC	XM_016659152.1	XM_016659152.1	-	-	643-660	2.5	-
hbr-MIR6173-p5_2ss17AG18GC	XM_016637202.1	XM_016637202.1	ADH1	alcohol dehydrogenase 1	1199-1216	2.5	GO:0001666(response to hypoxia);GO:0004022(alcohol dehydrogenase );GO:0005737(cytoplasm);GO:0005794(Golgi apparatus);GO:0005829(cytosol);GO:0005886(plasma membrane);GO:0006970(response to osmotic stress);GO:0008270(zinc ion binding);GO:0009409(response to cold);GO:0009413(response to flooding);GO:0009414(response to water deprivation);GO:0009651(response to salt stress);GO:0009737(response to abs…	ko00010(Glycolysis / Gluconeogenesis);ko00071(Fatty acid degradation);ko00592(alpha-Linolenic acid metabolism);ko00350(Tyrosine metabolism)
PC-3p-171618_30	XM_016623335.1	XM_016623335.1	DHBK	putative 3	619-639	2.5	GO:0004371(glycerone kinase activity);GO:0005524(ATP binding);GO:0005737(cytoplasm);GO:0006071(glycerol metabolic process);GO:0016310(phosphorylation)	ko01200(Carbon metabolism);ko00051(Fructose and mannose metabolism);ko00561(Glycerolipid metabolism)
PC-3p-171618_30	XM_016578709.1	XM_016578709.1	NUDT3	-	1930-1950	1.2	GO:0005515(protein binding);GO:0005737(cytoplasm);GO:0005773(vacuole);GO:0005829(cytosol);GO:0016787(hydrolase activity);GO:0046872(metal ion binding)
PC-3p-171618_30	XM_016610040.1	XM_016610040.1	DL	-	896-915	2	GO:0010022(meristem determinacy);GO:0048366(leaf development);GO:0048440(carpel development)
PC-3p-171618_30	XM_016579314.1	XM_016579314.1	-	DNA replication ATP-dependent helicase/nuclease DNA2	699-719	1.8	-	ko03030(DNA replication)
PC-3p-171618_30	XM_016648048.1	XM_016648048.1	dna2	DNA replication ATP-dependent helicase/nuclease DNA2	2897-2917	1.8	GO:0005575(cellular_component);GO:0008150(biological_process)	ko03030(DNA replication)
PC-3p-171618_30	XM_016648046.1	XM_016648046.1	dna2	DNA replication ATP-dependent helicase/nuclease DNA2	3536-3556	1.8	GO:0005575(cellular_component);GO:0008150(biological_process)	ko03030(DNA replication)
PC-3p-171618_30	XM_016648047.1	XM_016648047.1	dna2	DNA replication ATP-dependent helicase/nuclease DNA2	3437-3457	1.8	GO:0005575(cellular_component);GO:0008150(biological_process)	ko03030(DNA replication)
PC-3p-171618_30	XM_016648045.1	XM_016648045.1	dna2	DNA replication ATP-dependent helicase/nuclease DNA2	3692-3712	1.8	GO:0005575(cellular_component);GO:0008150(biological_process)	ko03030(DNA replication)
PC-3p-171618_30	XM_016648996.1	XM_016648996.1	BGAL3	beta-galactosidase	1234-1254	2.5	GO:0004565(beta-galactosidase activity);GO:0005618(cell wall);GO:0005773(vacuole)	ko00052(Galactose metabolism);ko00600(Sphingolipid metabolism);ko00531(Glycosaminoglycan degradation);ko00604(Glycosphingolipid biosynthesis - ganglio series);ko00511(Other glycan degradation)
PC-3p-171618_30	XM_016649027.1	XM_016649027.1	WLIM1	-	522-541	2.5	GO:0003700(transcription factor activity, sequence-specific DNA binding);GO:0005737(cytoplasm);GO:0005856(cytoskeleton);GO:0005886(plasma membrane);GO:0008270(zinc ion binding);GO:0051015(actin filament binding);GO:0051017(actin filament bundle assembly)
PC-3p-171618_30	XM_016582089.1	XM_016582089.1	DL	-	806-825	2	GO:0010022(meristem determinacy);GO:0048366(leaf development);GO:0048440(carpel development)
PC-3p-171618_30	XM_016582446.1	XM_016582446.1	At1g76280	-	609-628	2.2	-
PC-3p-171618_30	XM_016582447.1	XM_016582447.1	At1g76280	-	501-520	2.2	-
PC-3p-171618_30	XM_016655567.1	XM_016655567.1	BGAL3	beta-galactosidase	1150-1170	2.5	GO:0004565(beta-galactosidase activity);GO:0005618(cell wall);GO:0005773(vacuole)	ko00052(Galactose metabolism);ko00600(Sphingolipid metabolism);ko00531(Glycosaminoglycan degradation);ko00604(Glycosphingolipid biosynthesis - ganglio series);ko00511(Other glycan degradation)
PC-3p-171618_30	XM_016640343.1	XM_016640343.1	FAR1	-	2790-2810	2.5	GO:0003700(transcription factor activity, sequence-specific DNA binding);GO:0005515(protein binding);GO:0005634(nucleus);GO:0008270(zinc ion binding);GO:0009639(response to red or far red light);GO:0010017(red or far-red light signaling pathway);GO:0010018(far-red light signaling pathway);GO:0010218(response to far red light);GO:0042753(positive regulation of circadian rhythm);GO:0045893(positive…
PC-3p-171618_30	XM_016640340.1	XM_016640340.1	FAR1	-	2885-2905	2.5	GO:0003700(transcription factor activity, sequence-specific DNA binding);GO:0005515(protein binding);GO:0005634(nucleus);GO:0008270(zinc ion binding);GO:0009639(response to red or far red light);GO:0010017(red or far-red light signaling pathway);GO:0010018(far-red light signaling pathway);GO:0010218(response to far red light);GO:0042753(positive regulation of circadian rhythm);GO:0045893(positive…
PC-3p-171618_30	XM_016640335.1	XM_016640335.1	FAR1	-	2858-2878	2.5	GO:0003700(transcription factor activity, sequence-specific DNA binding);GO:0005515(protein binding);GO:0005634(nucleus);GO:0008270(zinc ion binding);GO:0009639(response to red or far red light);GO:0010017(red or far-red light signaling pathway);GO:0010018(far-red light signaling pathway);GO:0010218(response to far red light);GO:0042753(positive regulation of circadian rhythm);GO:0045893(positive…
PC-3p-171618_30	XM_016640342.1	XM_016640342.1	FAR1	-	2852-2872	2.5	GO:0003700(transcription factor activity, sequence-specific DNA binding);GO:0005515(protein binding);GO:0005634(nucleus);GO:0008270(zinc ion binding);GO:0009639(response to red or far red light);GO:0010017(red or far-red light signaling pathway);GO:0010018(far-red light signaling pathway);GO:0010218(response to far red light);GO:0042753(positive regulation of circadian rhythm);GO:0045893(positive…
PC-3p-171618_30	XM_016640339.1	XM_016640339.1	FAR1	-	2798-2818	2.5	GO:0003700(transcription factor activity, sequence-specific DNA binding);GO:0005515(protein binding);GO:0005634(nucleus);GO:0008270(zinc ion binding);GO:0009639(response to red or far red light);GO:0010017(red or far-red light signaling pathway);GO:0010018(far-red light signaling pathway);GO:0010218(response to far red light);GO:0042753(positive regulation of circadian rhythm);GO:0045893(positive…
PC-3p-171618_30	XM_016640336.1	XM_016640336.1	FAR1	-	2787-2807	2.5	GO:0003700(transcription factor activity, sequence-specific DNA binding);GO:0005515(protein binding);GO:0005634(nucleus);GO:0008270(zinc ion binding);GO:0009639(response to red or far red light);GO:0010017(red or far-red light signaling pathway);GO:0010018(far-red light signaling pathway);GO:0010218(response to far red light);GO:0042753(positive regulation of circadian rhythm);GO:0045893(positive…
PC-3p-171618_30	XM_016640341.1	XM_016640341.1	FAR1	-	2711-2731	2.5	GO:0003700(transcription factor activity, sequence-specific DNA binding);GO:0005515(protein binding);GO:0005634(nucleus);GO:0008270(zinc ion binding);GO:0009639(response to red or far red light);GO:0010017(red or far-red light signaling pathway);GO:0010018(far-red light signaling pathway);GO:0010218(response to far red light);GO:0042753(positive regulation of circadian rhythm);GO:0045893(positive…
PC-3p-171618_30	XM_016640338.1	XM_016640338.1	FAR1	-	3940-3960	2.5	GO:0003700(transcription factor activity, sequence-specific DNA binding);GO:0005515(protein binding);GO:0005634(nucleus);GO:0008270(zinc ion binding);GO:0009639(response to red or far red light);GO:0010017(red or far-red light signaling pathway);GO:0010018(far-red light signaling pathway);GO:0010218(response to far red light);GO:0042753(positive regulation of circadian rhythm);GO:0045893(positive…
PC-3p-171618_30	XM_016640337.1	XM_016640337.1	FAR1	-	2762-2782	2.5	GO:0003700(transcription factor activity, sequence-specific DNA binding);GO:0005515(protein binding);GO:0005634(nucleus);GO:0008270(zinc ion binding);GO:0009639(response to red or far red light);GO:0010017(red or far-red light signaling pathway);GO:0010018(far-red light signaling pathway);GO:0010218(response to far red light);GO:0042753(positive regulation of circadian rhythm);GO:0045893(positive…
PC-3p-171618_30	XM_016633531.1	XM_016633531.1	-	uncharacterized LOC102700269	1318-1339	2	GO:0009507(chloroplast)	ko00620(Pyruvate metabolism)
PC-3p-171618_30	XM_016633532.1	XM_016633532.1	-	uncharacterized LOC102700269	1300-1321	2	GO:0009507(chloroplast)	ko00620(Pyruvate metabolism)
PC-3p-171618_30	XM_016641901.1	XM_016641901.1	At1g76280	-	652-671	2.2	-
PC-3p-171618_30	XM_016641899.1	XM_016641899.1	At1g76280	-	647-666	2.2	-
PC-3p-171618_30	XM_016641900.1	XM_016641900.1	At1g76280	-	632-651	2.2	-
PC-3p-171618_30	XM_016590262.1	XM_016590262.1	NUDT3	-	2148-2168	1.2	GO:0005515(protein binding);GO:0005737(cytoplasm);GO:0005773(vacuole);GO:0005829(cytosol);GO:0016787(hydrolase activity);GO:0046872(metal ion binding)
PC-3p-171618_30	XM_016590261.1	XM_016590261.1	NUDT3	-	1872-1892	1.2	GO:0005515(protein binding);GO:0005737(cytoplasm);GO:0005773(vacuole);GO:0005829(cytosol);GO:0016787(hydrolase activity);GO:0046872(metal ion binding)
PC-3p-171618_30	XM_016607174.1	XM_016607174.1	AFP2	extensin-like	1404-1425	2.2	GO:0005515(protein binding);GO:0005634(nucleus);GO:0007165(signal transduction);GO:0009414(response to water deprivation);GO:0009737(response to abscisic acid)	ko04144(Endocytosis)
PC-3p-171618_30	XM_016607173.1	XM_016607173.1	AFP2	extensin-like	1449-1470	2.2	GO:0005515(protein binding);GO:0005634(nucleus);GO:0007165(signal transduction);GO:0009414(response to water deprivation);GO:0009737(response to abscisic acid)	ko04144(Endocytosis)
PC-3p-171618_30	XM_016622259.1	XM_016622259.1	WLIM1	-	513-532	2.5	GO:0003700(transcription factor activity, sequence-specific DNA binding);GO:0005737(cytoplasm);GO:0005856(cytoskeleton);GO:0005886(plasma membrane);GO:0008270(zinc ion binding);GO:0051015(actin filament binding);GO:0051017(actin filament bundle assembly)
PC-3p-171618_30	XM_016637755.1	XM_016637755.1	-	beta-galactosidase	1104-1124	2	GO:0004565(beta-galactosidase activity);GO:0005618(cell wall);GO:0005773(vacuole)	ko00052(Galactose metabolism);ko00600(Sphingolipid metabolism);ko00531(Glycosaminoglycan degradation);ko00604(Glycosphingolipid biosynthesis - ganglio series);ko00511(Other glycan degradation)
mtr-MIR2603-p5_2ss9AC17AC	XM_016645282.1	XM_016645282.1	EULS3	-	319-336	2.5	GO:0005515(protein binding);GO:0005634(nucleus);GO:0005737(cytoplasm);GO:0030246(carbohydrate binding);GO:0042742(defense response to bacterium);GO:0090332(stomatal closure)
mtr-MIR2603-p5_2ss9AC17AC	XM_016608278.1	XM_016608278.1	PERK9	BRASSINOSTEROID INSENSITIVE 1-associated receptor kinase 1-like	1682-1699	2.2	GO:0004674(protein serine/threonine kinase activity);GO:0005886(plasma membrane)	ko04075(Plant hormone signal transduction);ko04626(Plant-pathogen interaction)
mtr-MIR2603-p5_2ss9AC17AC	XM_016608313.1	XM_016608313.1	-	-	727-744	2.2	GO:0003676(nucleic acid binding);GO:0005634(nucleus);GO:0008270(zinc ion binding)
mtr-MIR2603-p5_2ss9AC17AC	XM_016577373.1	XM_016577373.1	EULS3	-	852-869	2.5	GO:0005515(protein binding);GO:0005634(nucleus);GO:0005737(cytoplasm);GO:0030246(carbohydrate binding);GO:0042742(defense response to bacterium);GO:0090332(stomatal closure)
mtr-MIR2603-p5_2ss9AC17AC	XM_016577374.1	XM_016577374.1	EULS3	-	852-869	2.5	GO:0005515(protein binding);GO:0005634(nucleus);GO:0005737(cytoplasm);GO:0030246(carbohydrate binding);GO:0042742(defense response to bacterium);GO:0090332(stomatal closure)
mtr-MIR2603-p5_2ss9AC17AC	XM_016578592.1	XM_016578592.1	MED23	-	2475-2491	2.5	GO:0003674(molecular_function);GO:0005634(nucleus);GO:0006351(transcription, DNA-templated);GO:0006355(regulation of transcription, DNA-templated);GO:0016592(mediator complex)
mtr-MIR2603-p5_2ss9AC17AC	XM_016609705.1	XM_016609705.1	DI19-5	-	597-614	2.5	-
mtr-MIR2603-p5_2ss9AC17AC	XM_016609704.1	XM_016609704.1	DI19-5	-	592-609	2.5	-
mtr-MIR2603-p5_2ss9AC17AC	XM_016609706.1	XM_016609706.1	DI19-5	-	472-489	2.5	-
mtr-MIR2603-p5_2ss9AC17AC	XM_016582212.1	XM_016582212.1	PPI1	-	287-304	2	GO:0005515(protein binding);GO:0005737(cytoplasm);GO:0005783(endoplasmic reticulum);GO:0005789(endoplasmic reticulum membrane);GO:0005829(cytosol);GO:0005886(plasma membrane);GO:0009506(plasmodesma);GO:0010155(regulation of proton transport);GO:0016021(integral component of membrane)
mtr-MIR2603-p5_2ss9AC17AC	XM_016628687.1	XM_016628687.1	At3g08650	-	628-645	2.5	GO:0000139(Golgi membrane);GO:0005385(zinc ion transmembrane transporter activity);GO:0005802(trans-Golgi network);GO:0071577(zinc II ion transmembrane transport)
mtr-MIR2603-p5_2ss9AC17AC	XM_016628685.1	XM_016628685.1	At3g08650	-	623-640	2.5	GO:0000139(Golgi membrane);GO:0005385(zinc ion transmembrane transporter activity);GO:0005802(trans-Golgi network);GO:0071577(zinc II ion transmembrane transport)
mtr-MIR2603-p5_2ss9AC17AC	XM_016651390.1	XM_016651390.1	PLMT	phosphatidyl-N-methylethanolamine N-methyltransferase	81-98	2.5	GO:0000773(phosphatidyl-N-methylethanolamine N-methyltransferase activity);GO:0005789(endoplasmic reticulum membrane);GO:0008654(phospholipid biosynthetic process);GO:0080101(phosphatidyl-N-dimethylethanolamine N-methyltransferase activity)	ko00564(Glycerophospholipid metabolism)
mtr-MIR2603-p5_2ss9AC17AC	XM_016599240.1	XM_016599240.1	AHL5	-	1275-1292	2	GO:0003677(DNA binding);GO:0005515(protein binding);GO:0005634(nucleus);GO:0006351(transcription, DNA-templated);GO:0006355(regulation of transcription, DNA-templated)
mtr-MIR2603-p5_2ss9AC17AC	XM_016599241.1	XM_016599241.1	AHL5	-	1397-1414	2	GO:0003677(DNA binding);GO:0005515(protein binding);GO:0005634(nucleus);GO:0006351(transcription, DNA-templated);GO:0006355(regulation of transcription, DNA-templated)
mtr-MIR2603-p5_2ss9AC17AC	XM_016599239.1	XM_016599239.1	AHL5	-	1392-1409	2	GO:0003677(DNA binding);GO:0005515(protein binding);GO:0005634(nucleus);GO:0006351(transcription, DNA-templated);GO:0006355(regulation of transcription, DNA-templated)
mtr-MIR2603-p5_2ss9AC17AC	XM_016614446.1	XM_016614446.1	V2	guanylate kinase 2	868-885	2.5	GO:0004385(guanylate kinase activity);GO:0005524(ATP binding);GO:0009507(chloroplast);GO:0016310(phosphorylation);GO:0048638(regulation of developmental growth)	ko00230(Purine metabolism)
mtr-MIR2603-p5_2ss9AC17AC	XM_016599907.1				328-345	2.5	-
mtr-MIR2603-p5_2ss9AC17AC	XM_016654345.1	XM_016654345.1	At5g64816	Calmodulin	224-241	2	GO:0003674(molecular_function);GO:0005575(cellular_component);GO:0008150(biological_process)	ko04070(Phosphatidylinositol signaling system)
mtr-MIR2603-p5_2ss9AC17AC	XM_016654344.1	XM_016654344.1	At5g64816	Calmodulin	246-263	2	GO:0003674(molecular_function);GO:0005575(cellular_component);GO:0008150(biological_process)	ko04070(Phosphatidylinositol signaling system)
mtr-MIR2603-p5_2ss9AC17AC	XM_016655673.1	XM_016655673.1	DI19-5	-	450-467	2.5	-
mtr-MIR2603-p5_2ss9AC17AC	XM_016655674.1	XM_016655674.1	DI19-6	-	417-434	2.5	-
mtr-MIR2603-p5_2ss9AC17AC	XM_016655671.1	XM_016655671.1	DI19-5	-	728-745	2.5	-
mtr-MIR2603-p5_2ss9AC17AC	XM_016655672.1	XM_016655672.1	DI19-5	-	736-753	2.5	-
mtr-MIR2603-p5_2ss9AC17AC	XM_016640936.1	XM_016640936.1	-	-	285-302	2.5	GO:0003674(molecular_function);GO:0008150(biological_process)
mtr-MIR2603-p5_2ss9AC17AC	XM_016634930.1	XM_016634930.1	AHL5	-	1378-1395	2	GO:0003677(DNA binding);GO:0005515(protein binding);GO:0005634(nucleus);GO:0006351(transcription, DNA-templated);GO:0006355(regulation of transcription, DNA-templated)
mtr-MIR2603-p5_2ss9AC17AC	XM_016634931.1	XM_016634931.1	AHL5	-	1383-1400	2	GO:0003677(DNA binding);GO:0005515(protein binding);GO:0005634(nucleus);GO:0006351(transcription, DNA-templated);GO:0006355(regulation of transcription, DNA-templated)
mtr-MIR2603-p5_2ss9AC17AC	XM_016634929.1	XM_016634929.1	AHL5	-	1286-1303	2	GO:0003677(DNA binding);GO:0005515(protein binding);GO:0005634(nucleus);GO:0006351(transcription, DNA-templated);GO:0006355(regulation of transcription, DNA-templated)
mtr-MIR2603-p5_2ss9AC17AC	XM_016642179.1	XM_016642179.1	KIN14J	hypothetical protein	3145-3162	2.2	GO:0003777(microtubule motor activity);GO:0005871(kinesin complex);GO:0007018(microtubule-based movement);GO:0016887(ATPase activity)	ko03008(Ribosome biogenesis in eukaryotes)
mtr-MIR2603-p5_2ss9AC17AC	XM_016642476.1	XM_016642476.1	UGT709C2	UDP-glycosyltransferase 85A1	775-792	2.5	GO:0009813(flavonoid biosynthetic process);GO:0043231(intracellular membrane-bounded organelle);GO:0052696(flavonoid glucuronidation);GO:0080043(quercetin 3-O-glucosyltransferase activity);GO:0080044(quercetin 7-O-glucosyltransferase activity)	ko00908(Zeatin biosynthesis)
mtr-MIR2603-p5_2ss9AC17AC	XM_016620988.1	XM_016620988.1	V2	guanylate kinase 2	817-834	2.5	GO:0004385(guanylate kinase activity);GO:0005524(ATP binding);GO:0009507(chloroplast);GO:0016310(phosphorylation);GO:0048638(regulation of developmental growth)	ko00230(Purine metabolism)
mtr-MIR2603-p5_2ss9AC17AC	XM_016659073.1	XM_016659073.1	DRM2	DNA (cytosine-5-)-methyltransferase	2305-2322	2.5	GO:0003677(DNA binding);GO:0003886(DNA );GO:0005515(protein binding);GO:0005634(nucleus);GO:0005654(nucleoplasm);GO:0006306(DNA methylation);GO:0008170(N-methyltransferase activity);GO:0016458(gene silencing);GO:0050832(defense response to fungus);GO:0051567(histone H3-K9 methylation)	ko00270(Cysteine and methionine metabolism)
mtr-MIR2603-p5_2ss9AC17AC	XM_016659077.1	XM_016659077.1	DRM2	DNA (cytosine-5-)-methyltransferase	2188-2205	2.5	GO:0003677(DNA binding);GO:0003886(DNA );GO:0005515(protein binding);GO:0005634(nucleus);GO:0005654(nucleoplasm);GO:0006306(DNA methylation);GO:0008170(N-methyltransferase activity);GO:0016458(gene silencing);GO:0050832(defense response to fungus);GO:0051567(histone H3-K9 methylation)	ko00270(Cysteine and methionine metabolism)
mtr-MIR2603-p5_2ss9AC17AC	XM_016659076.1	XM_016659076.1	DRM2	DNA (cytosine-5-)-methyltransferase	2300-2317	2.5	GO:0003677(DNA binding);GO:0003886(DNA );GO:0005515(protein binding);GO:0005634(nucleus);GO:0005654(nucleoplasm);GO:0006306(DNA methylation);GO:0008170(N-methyltransferase activity);GO:0016458(gene silencing);GO:0050832(defense response to fungus);GO:0051567(histone H3-K9 methylation)	ko00270(Cysteine and methionine metabolism)
mtr-MIR2603-p5_2ss9AC17AC	XM_016659075.1	XM_016659075.1	DRM2	DNA (cytosine-5-)-methyltransferase	2305-2322	2.5	GO:0003677(DNA binding);GO:0003886(DNA );GO:0005515(protein binding);GO:0005634(nucleus);GO:0005654(nucleoplasm);GO:0006306(DNA methylation);GO:0008170(N-methyltransferase activity);GO:0016458(gene silencing);GO:0050832(defense response to fungus);GO:0051567(histone H3-K9 methylation)	ko00270(Cysteine and methionine metabolism)
mtr-MIR2603-p5_2ss9AC17AC	XM_016636797.1	XM_016636797.1	truA	-	1209-1226	1.8	-
mtr-MIR2603-p5_2ss9AC17AC	XM_016636795.1	XM_016636795.1	truA	-	1119-1136	1.8	-
mtr-MIR2603-p5_2ss9AC17AC	XM_016637042.1	XM_016637042.1	-	-	733-750	2.2	GO:0003676(nucleic acid binding);GO:0005634(nucleus);GO:0008270(zinc ion binding)
mtr-MIR2603-p5_2ss9AC17AC	XM_016637043.1	XM_016637043.1	-	-	733-750	2.2	GO:0003676(nucleic acid binding);GO:0005634(nucleus);GO:0008270(zinc ion binding)
mtr-MIR2603-p3_2ss9AC17AC	XM_016645282.1	XM_016645282.1	EULS3	-	319-336	2.5	GO:0005515(protein binding);GO:0005634(nucleus);GO:0005737(cytoplasm);GO:0030246(carbohydrate binding);GO:0042742(defense response to bacterium);GO:0090332(stomatal closure)
mtr-MIR2603-p3_2ss9AC17AC	XM_016608278.1	XM_016608278.1	PERK9	BRASSINOSTEROID INSENSITIVE 1-associated receptor kinase 1-like	1682-1699	2.2	GO:0004674(protein serine/threonine kinase activity);GO:0005886(plasma membrane)	ko04075(Plant hormone signal transduction);ko04626(Plant-pathogen interaction)
mtr-MIR2603-p3_2ss9AC17AC	XM_016608313.1	XM_016608313.1	-	-	727-744	2.2	GO:0003676(nucleic acid binding);GO:0005634(nucleus);GO:0008270(zinc ion binding)
mtr-MIR2603-p3_2ss9AC17AC	XM_016577373.1	XM_016577373.1	EULS3	-	852-869	2.5	GO:0005515(protein binding);GO:0005634(nucleus);GO:0005737(cytoplasm);GO:0030246(carbohydrate binding);GO:0042742(defense response to bacterium);GO:0090332(stomatal closure)
mtr-MIR2603-p3_2ss9AC17AC	XM_016577374.1	XM_016577374.1	EULS3	-	852-869	2.5	GO:0005515(protein binding);GO:0005634(nucleus);GO:0005737(cytoplasm);GO:0030246(carbohydrate binding);GO:0042742(defense response to bacterium);GO:0090332(stomatal closure)
mtr-MIR2603-p3_2ss9AC17AC	XM_016578592.1	XM_016578592.1	MED23	-	2475-2491	2.5	GO:0003674(molecular_function);GO:0005634(nucleus);GO:0006351(transcription, DNA-templated);GO:0006355(regulation of transcription, DNA-templated);GO:0016592(mediator complex)
mtr-MIR2603-p3_2ss9AC17AC	XM_016609705.1	XM_016609705.1	DI19-5	-	597-614	2.5	-
mtr-MIR2603-p3_2ss9AC17AC	XM_016609704.1	XM_016609704.1	DI19-5	-	592-609	2.5	-
mtr-MIR2603-p3_2ss9AC17AC	XM_016609706.1	XM_016609706.1	DI19-5	-	472-489	2.5	-
mtr-MIR2603-p3_2ss9AC17AC	XM_016582212.1	XM_016582212.1	PPI1	-	287-304	2	GO:0005515(protein binding);GO:0005737(cytoplasm);GO:0005783(endoplasmic reticulum);GO:0005789(endoplasmic reticulum membrane);GO:0005829(cytosol);GO:0005886(plasma membrane);GO:0009506(plasmodesma);GO:0010155(regulation of proton transport);GO:0016021(integral component of membrane)
mtr-MIR2603-p3_2ss9AC17AC	XM_016628687.1	XM_016628687.1	At3g08650	-	628-645	2.5	GO:0000139(Golgi membrane);GO:0005385(zinc ion transmembrane transporter activity);GO:0005802(trans-Golgi network);GO:0071577(zinc II ion transmembrane transport)
mtr-MIR2603-p3_2ss9AC17AC	XM_016628685.1	XM_016628685.1	At3g08650	-	623-640	2.5	GO:0000139(Golgi membrane);GO:0005385(zinc ion transmembrane transporter activity);GO:0005802(trans-Golgi network);GO:0071577(zinc II ion transmembrane transport)
mtr-MIR2603-p3_2ss9AC17AC	XM_016651390.1	XM_016651390.1	PLMT	phosphatidyl-N-methylethanolamine N-methyltransferase	81-98	2.5	GO:0000773(phosphatidyl-N-methylethanolamine N-methyltransferase activity);GO:0005789(endoplasmic reticulum membrane);GO:0008654(phospholipid biosynthetic process);GO:0080101(phosphatidyl-N-dimethylethanolamine N-methyltransferase activity)	ko00564(Glycerophospholipid metabolism)
mtr-MIR2603-p3_2ss9AC17AC	XM_016599240.1	XM_016599240.1	AHL5	-	1275-1292	2	GO:0003677(DNA binding);GO:0005515(protein binding);GO:0005634(nucleus);GO:0006351(transcription, DNA-templated);GO:0006355(regulation of transcription, DNA-templated)
mtr-MIR2603-p3_2ss9AC17AC	XM_016599241.1	XM_016599241.1	AHL5	-	1397-1414	2	GO:0003677(DNA binding);GO:0005515(protein binding);GO:0005634(nucleus);GO:0006351(transcription, DNA-templated);GO:0006355(regulation of transcription, DNA-templated)
mtr-MIR2603-p3_2ss9AC17AC	XM_016599239.1	XM_016599239.1	AHL5	-	1392-1409	2	GO:0003677(DNA binding);GO:0005515(protein binding);GO:0005634(nucleus);GO:0006351(transcription, DNA-templated);GO:0006355(regulation of transcription, DNA-templated)
mtr-MIR2603-p3_2ss9AC17AC	XM_016614446.1	XM_016614446.1	V2	guanylate kinase 2	868-885	2.5	GO:0004385(guanylate kinase activity);GO:0005524(ATP binding);GO:0009507(chloroplast);GO:0016310(phosphorylation);GO:0048638(regulation of developmental growth)	ko00230(Purine metabolism)
mtr-MIR2603-p3_2ss9AC17AC	XM_016599907.1				328-345	2.5	-
mtr-MIR2603-p3_2ss9AC17AC	XM_016654345.1	XM_016654345.1	At5g64816	Calmodulin	224-241	2	GO:0003674(molecular_function);GO:0005575(cellular_component);GO:0008150(biological_process)	ko04070(Phosphatidylinositol signaling system)
mtr-MIR2603-p3_2ss9AC17AC	XM_016654344.1	XM_016654344.1	At5g64816	Calmodulin	246-263	2	GO:0003674(molecular_function);GO:0005575(cellular_component);GO:0008150(biological_process)	ko04070(Phosphatidylinositol signaling system)
mtr-MIR2603-p3_2ss9AC17AC	XM_016655673.1	XM_016655673.1	DI19-5	-	450-467	2.5	-
mtr-MIR2603-p3_2ss9AC17AC	XM_016655674.1	XM_016655674.1	DI19-6	-	417-434	2.5	-
mtr-MIR2603-p3_2ss9AC17AC	XM_016655671.1	XM_016655671.1	DI19-5	-	728-745	2.5	-
mtr-MIR2603-p3_2ss9AC17AC	XM_016655672.1	XM_016655672.1	DI19-5	-	736-753	2.5	-
mtr-MIR2603-p3_2ss9AC17AC	XM_016640936.1	XM_016640936.1	-	-	285-302	2.5	GO:0003674(molecular_function);GO:0008150(biological_process)
mtr-MIR2603-p3_2ss9AC17AC	XM_016634930.1	XM_016634930.1	AHL5	-	1378-1395	2	GO:0003677(DNA binding);GO:0005515(protein binding);GO:0005634(nucleus);GO:0006351(transcription, DNA-templated);GO:0006355(regulation of transcription, DNA-templated)
mtr-MIR2603-p3_2ss9AC17AC	XM_016634931.1	XM_016634931.1	AHL5	-	1383-1400	2	GO:0003677(DNA binding);GO:0005515(protein binding);GO:0005634(nucleus);GO:0006351(transcription, DNA-templated);GO:0006355(regulation of transcription, DNA-templated)
mtr-MIR2603-p3_2ss9AC17AC	XM_016634929.1	XM_016634929.1	AHL5	-	1286-1303	2	GO:0003677(DNA binding);GO:0005515(protein binding);GO:0005634(nucleus);GO:0006351(transcription, DNA-templated);GO:0006355(regulation of transcription, DNA-templated)
mtr-MIR2603-p3_2ss9AC17AC	XM_016642179.1	XM_016642179.1	KIN14J	hypothetical protein	3145-3162	2.2	GO:0003777(microtubule motor activity);GO:0005871(kinesin complex);GO:0007018(microtubule-based movement);GO:0016887(ATPase activity)	ko03008(Ribosome biogenesis in eukaryotes)
mtr-MIR2603-p3_2ss9AC17AC	XM_016642476.1	XM_016642476.1	UGT709C2	UDP-glycosyltransferase 85A1	775-792	2.5	GO:0009813(flavonoid biosynthetic process);GO:0043231(intracellular membrane-bounded organelle);GO:0052696(flavonoid glucuronidation);GO:0080043(quercetin 3-O-glucosyltransferase activity);GO:0080044(quercetin 7-O-glucosyltransferase activity)	ko00908(Zeatin biosynthesis)
mtr-MIR2603-p3_2ss9AC17AC	XM_016620988.1	XM_016620988.1	V2	guanylate kinase 2	817-834	2.5	GO:0004385(guanylate kinase activity);GO:0005524(ATP binding);GO:0009507(chloroplast);GO:0016310(phosphorylation);GO:0048638(regulation of developmental growth)	ko00230(Purine metabolism)
mtr-MIR2603-p3_2ss9AC17AC	XM_016659073.1	XM_016659073.1	DRM2	DNA (cytosine-5-)-methyltransferase	2305-2322	2.5	GO:0003677(DNA binding);GO:0003886(DNA );GO:0005515(protein binding);GO:0005634(nucleus);GO:0005654(nucleoplasm);GO:0006306(DNA methylation);GO:0008170(N-methyltransferase activity);GO:0016458(gene silencing);GO:0050832(defense response to fungus);GO:0051567(histone H3-K9 methylation)	ko00270(Cysteine and methionine metabolism)
mtr-MIR2603-p3_2ss9AC17AC	XM_016659077.1	XM_016659077.1	DRM2	DNA (cytosine-5-)-methyltransferase	2188-2205	2.5	GO:0003677(DNA binding);GO:0003886(DNA );GO:0005515(protein binding);GO:0005634(nucleus);GO:0005654(nucleoplasm);GO:0006306(DNA methylation);GO:0008170(N-methyltransferase activity);GO:0016458(gene silencing);GO:0050832(defense response to fungus);GO:0051567(histone H3-K9 methylation)	ko00270(Cysteine and methionine metabolism)
mtr-MIR2603-p3_2ss9AC17AC	XM_016659076.1	XM_016659076.1	DRM2	DNA (cytosine-5-)-methyltransferase	2300-2317	2.5	GO:0003677(DNA binding);GO:0003886(DNA );GO:0005515(protein binding);GO:0005634(nucleus);GO:0005654(nucleoplasm);GO:0006306(DNA methylation);GO:0008170(N-methyltransferase activity);GO:0016458(gene silencing);GO:0050832(defense response to fungus);GO:0051567(histone H3-K9 methylation)	ko00270(Cysteine and methionine metabolism)
mtr-MIR2603-p3_2ss9AC17AC	XM_016659075.1	XM_016659075.1	DRM2	DNA (cytosine-5-)-methyltransferase	2305-2322	2.5	GO:0003677(DNA binding);GO:0003886(DNA );GO:0005515(protein binding);GO:0005634(nucleus);GO:0005654(nucleoplasm);GO:0006306(DNA methylation);GO:0008170(N-methyltransferase activity);GO:0016458(gene silencing);GO:0050832(defense response to fungus);GO:0051567(histone H3-K9 methylation)	ko00270(Cysteine and methionine metabolism)
mtr-MIR2603-p3_2ss9AC17AC	XM_016636797.1	XM_016636797.1	truA	-	1209-1226	1.8	-
mtr-MIR2603-p3_2ss9AC17AC	XM_016636795.1	XM_016636795.1	truA	-	1119-1136	1.8	-
mtr-MIR2603-p3_2ss9AC17AC	XM_016637042.1	XM_016637042.1	-	-	733-750	2.2	GO:0003676(nucleic acid binding);GO:0005634(nucleus);GO:0008270(zinc ion binding)
mtr-MIR2603-p3_2ss9AC17AC	XM_016637043.1	XM_016637043.1	-	-	733-750	2.2	GO:0003676(nucleic acid binding);GO:0005634(nucleus);GO:0008270(zinc ion binding)
hbr-MIR6173-p3_2ss18GA19CG	XM_016577018.1	XM_016577018.1	-	uncharacterized LOC106377927	353-371	2.5	-	ko00190(Oxidative phosphorylation)
hbr-MIR6173-p3_2ss18GA19CG	XM_016580584.1	XM_016580584.1	PPC1	phosphoenolpyruvate carboxylase-like	3275-3293	2.5	GO:0005829(cytosol);GO:0008964(phosphoenolpyruvate carboxylase activity);GO:0009507(chloroplast);GO:0048046(apoplast);GO:0048366(leaf development)	ko01200(Carbon metabolism);ko00620(Pyruvate metabolism);ko00710(Carbon fixation in photosynthetic organisms)
hbr-MIR6173-p3_2ss18GA19CG	XM_016597628.1	XM_016597628.1	-	uncharacterized LOC103646289	549-567	2.2	GO:0005576(extracellular region);GO:0005783(endoplasmic reticulum);GO:0006869(lipid transport);GO:0008289(lipid binding);GO:0009506(plasmodesma)	ko03010(Ribosome)
hbr-MIR6173-p3_2ss18GA19CG	XM_016614717.1	XM_016614717.1	sec61a	protein transport protein Sec61 subunit alpha-like	1018-1036	2.5	GO:0005794(Golgi apparatus);GO:0009306(protein secretion);GO:0015031(protein transport);GO:0015450(P-P-bond-hydrolysis-driven protein transmembrane transporter activity);GO:0016020(membrane);GO:0016021(integral component of membrane)	ko03060(Protein export);ko04141(Protein processing in endoplasmic reticulum);ko04145(Phagosome)
hbr-MIR6173-p3_2ss18GA19CG	XM_016614716.1	XM_016614716.1	sec61a	protein transport protein Sec61 subunit alpha-like	1033-1051	2.5	GO:0005794(Golgi apparatus);GO:0009306(protein secretion);GO:0015031(protein transport);GO:0015450(P-P-bond-hydrolysis-driven protein transmembrane transporter activity);GO:0016020(membrane);GO:0016021(integral component of membrane)	ko03060(Protein export);ko04141(Protein processing in endoplasmic reticulum);ko04145(Phagosome)
hbr-MIR6173-p3_2ss18GA19CG	XM_016636994.1	XM_016636994.1	LPA2	-	506-523	2.5	GO:0009507(chloroplast);GO:0009534(chloroplast thylakoid);GO:0009535(chloroplast thylakoid membrane);GO:0010207(photosystem II assembly);GO:0016021(integral component of membrane);GO:0042651(thylakoid membrane)
hbr-MIR6173-p3_2ss18GA19CG	XM_016633059.1	XM_016633059.1	RAP2-11	enolase 1	100-118	1	GO:0000302(response to reactive oxygen species);GO:0003677(DNA binding);GO:0003700(transcription factor activity, sequence-specific DNA binding);GO:0005634(nucleus);GO:0006351(transcription, DNA-templated);GO:0006355(regulation of transcription, DNA-templated);GO:0009723(response to ethylene);GO:0009873(ethylene-activated signaling pathway);GO:0035865(cellular response to potassium ion);GO:004356…	ko01200(Carbon metabolism);ko01230(Biosynthesis of amino acids);ko00010(Glycolysis / Gluconeogenesis);ko03018(RNA degradation)
hbr-MIR6173-p3_2ss18GA19CG	XM_016641135.1	XM_016641135.1	LPA2	-	504-521	2.5	GO:0009507(chloroplast);GO:0009534(chloroplast thylakoid);GO:0009535(chloroplast thylakoid membrane);GO:0010207(photosystem II assembly);GO:0016021(integral component of membrane);GO:0042651(thylakoid membrane)
hbr-MIR6173-p3_2ss18GA19CG	XM_016656925.1	XM_016656925.1	URH1	uridine nucleosidase 1-like	997-1015	2.5	GO:0005829(cytosol);GO:0006152(purine nucleoside catabolic process);GO:0008477(purine nucleosidase activity)	ko00240(Pyrimidine metabolism);ko00760(Nicotinate and nicotinamide metabolism)
hbr-MIR6173-p3_2ss18GA19CG	XM_016619164.1	XM_016619164.1	PGRL1A	-	857-874	2.2	GO:0005515(protein binding);GO:0009507(chloroplast);GO:0009534(chloroplast thylakoid);GO:0009535(chloroplast thylakoid membrane);GO:0009579(thylakoid);GO:0009773(photosynthetic electron transport in photosystem I);GO:0015979(photosynthesis);GO:0016021(integral component of membrane);GO:0016730(oxidoreductase activity, acting on iron-sulfur proteins as donors);GO:0042802(identical protein binding)
hbr-MIR6173-p3_2ss18GA19CG	XM_016637246.1	XM_016637246.1	-	-	98-115	2	GO:0003674(molecular_function);GO:0005680(anaphase-promoting complex);GO:0008150(biological_process);GO:0009507(chloroplast);GO:0090266(regulation of mitotic cell cycle spindle assembly checkpoint)
PC-3p-113881_50	XM_016624947.1	XM_016624947.1	TTL3	Carboxyl terminus of HSC70-interacting protein	93-117	2.2	GO:0005515(protein binding);GO:0005634(nucleus);GO:0006970(response to osmotic stress);GO:0009734(auxin-activated signaling pathway);GO:0009742(brassinosteroid mediated signaling pathway);GO:0010305(leaf vascular tissue pattern formation);GO:0045454(cell redox homeostasis)	ko04141(Protein processing in endoplasmic reticulum);ko04120(Ubiquitin mediated proteolysis)
PC-3p-113881_50	XM_016594532.1	XM_016594532.1	At4g31480	-	2051-2074	2.5	GO:0005198(structural molecule activity);GO:0005829(cytosol);GO:0006886(intracellular protein transport);GO:0016020(membrane);GO:0016192(vesicle-mediated transport);GO:0030126(COPI vesicle coat);GO:0030276(clathrin binding)
PC-3p-113881_50	XM_016628350.1	XM_016628350.1	dnaJ	dnaJ protein homolog	31-54	2	GO:0005737(cytoplasm);GO:0006457(protein folding)	ko04141(Protein processing in endoplasmic reticulum)
PC-3p-113881_50	XM_016614707.1	XM_016614707.1	At4g31480	-	2067-2090	2.5	GO:0005198(structural molecule activity);GO:0005829(cytosol);GO:0006886(intracellular protein transport);GO:0016020(membrane);GO:0016192(vesicle-mediated transport);GO:0030126(COPI vesicle coat);GO:0030276(clathrin binding)
PC-3p-113881_50	XM_016614705.1	XM_016614705.1	At4g31480	-	2035-2058	2.5	GO:0005198(structural molecule activity);GO:0005829(cytosol);GO:0006886(intracellular protein transport);GO:0016020(membrane);GO:0016192(vesicle-mediated transport);GO:0030126(COPI vesicle coat);GO:0030276(clathrin binding)
PC-3p-113881_50	XM_016614704.1	XM_016614704.1	At4g31480	-	2068-2091	2.5	GO:0005198(structural molecule activity);GO:0005829(cytosol);GO:0006886(intracellular protein transport);GO:0016020(membrane);GO:0016192(vesicle-mediated transport);GO:0030126(COPI vesicle coat);GO:0030276(clathrin binding)
PC-3p-113881_50	XM_016614706.1	XM_016614706.1	At4g31480	-	2078-2101	2.5	GO:0005198(structural molecule activity);GO:0005829(cytosol);GO:0006886(intracellular protein transport);GO:0016020(membrane);GO:0016192(vesicle-mediated transport);GO:0030126(COPI vesicle coat);GO:0030276(clathrin binding)
osa-MIR5825-p5_2ss15TC20AC	XM_016618234.1	XM_016618234.1	At1g04910	uncharacterized LOC103446271	146-166	2.5	GO:0005794(Golgi apparatus);GO:0016021(integral component of membrane);GO:0016757(transferase activity, transferring glycosyl groups)	ko00561(Glycerolipid metabolism);ko00564(Glycerophospholipid metabolism)
osa-MIR5825-p5_2ss15TC20AC	XM_016618283.1	XM_016618283.1	At1g04910	uncharacterized LOC103446271	149-169	2.5	GO:0005794(Golgi apparatus);GO:0016021(integral component of membrane);GO:0016757(transferase activity, transferring glycosyl groups)	ko00561(Glycerolipid metabolism);ko00564(Glycerophospholipid metabolism)
osa-MIR5825-p5_2ss15TC20AC	XM_016577014.1	XM_016577014.1	-	uncharacterized LOC103414975	656-676	2.5	GO:0001077(transcriptional activator activity, RNA polymerase II core promoter proximal region sequence-specific binding);GO:0005634(nucleus);GO:0043565(sequence-specific DNA binding);GO:0045944(positive regulation of transcription from RNA polymerase II promoter)	ko00230(Purine metabolism);ko00240(Pyrimidine metabolism);ko03030(DNA replication);ko03410(Base excision repair);ko03420(Nucleotide excision repair);ko03430(Mismatch repair);ko03440(Homologous recombination)
osa-MIR5825-p5_2ss15TC20AC	XM_016593616.1	XM_016593616.1	v1g238856	probable cinnamyl alcohol dehydrogenase 1	1317-1337	2	GO:0005737(cytoplasm);GO:0005777(peroxisome);GO:0005829(cytosol);GO:0008270(zinc ion binding);GO:0016491(oxidoreductase activity);GO:0055114(oxidation-reduction process)	ko00940(Phenylpropanoid biosynthesis)
osa-MIR5825-p5_2ss15TC20AC	XM_016647327.1	XM_016647327.1	GTE4	transcription initiation factor TFIID subunit 1	1139-1159	1.2	GO:0003677(DNA binding);GO:0005634(nucleus);GO:0006351(transcription, DNA-templated);GO:0006355(regulation of transcription, DNA-templated);GO:0009294(DNA mediated transformation);GO:0045931(positive regulation of mitotic cell cycle);GO:0048364(root development)	ko03022(Basal transcription factors)
osa-MIR5825-p5_2ss15TC20AC	XM_016652627.1	XM_016652627.1	PLL5	-	822-842	2.5	GO:0004722(protein serine/threonine phosphatase activity);GO:0005634(nucleus);GO:0005886(plasma membrane);GO:0006470(protein dephosphorylation);GO:0046872(metal ion binding);GO:0048366(leaf development)
osa-MIR5825-p5_2ss15TC20AC	XM_016625271.1	XM_016625271.1	ATG2	-	3103-3123	2.5	GO:0000045(autophagosome assembly);GO:0000407(pre-autophagosomal structure);GO:0000422(mitophagy);GO:0019898(extrinsic component of membrane);GO:0044804(nucleophagy)
osa-MIR5825-p5_2ss15TC20AC	XM_016625631.1	XM_016625631.1	At1g14600	uncharacterized protein LOC103984394	665-684	2.5	GO:0003677(DNA binding);GO:0003700(transcription factor activity, sequence-specific DNA binding);GO:0005634(nucleus);GO:0006351(transcription, DNA-templated);GO:0006355(regulation of transcription, DNA-templated)	ko03013(RNA transport)
osa-MIR5825-p5_2ss15TC20AC	XM_016647817.1	XM_016647817.1	AHK3	histidine kinase 3	2567-2587	2.5	GO:0000155(phosphorelay sensor kinase activity);GO:0000160(phosphorelay signal transduction system);GO:0004673(protein histidine kinase activity);GO:0004721(phosphoprotein phosphatase activity);GO:0005034(osmosensor activity);GO:0005515(protein binding);GO:0005789(endoplasmic reticulum membrane);GO:0005886(plasma membrane);GO:0006970(response to osmotic stress);GO:0009409(response to cold);GO:000…	ko04075(Plant hormone signal transduction)
osa-MIR5825-p5_2ss15TC20AC	XM_016647816.1	XM_016647816.1	AHK3	histidine kinase 3	2872-2892	2.5	GO:0000155(phosphorelay sensor kinase activity);GO:0000160(phosphorelay signal transduction system);GO:0004673(protein histidine kinase activity);GO:0004721(phosphoprotein phosphatase activity);GO:0005034(osmosensor activity);GO:0005515(protein binding);GO:0005789(endoplasmic reticulum membrane);GO:0005886(plasma membrane);GO:0006970(response to osmotic stress);GO:0009409(response to cold);GO:000…	ko04075(Plant hormone signal transduction)
osa-MIR5825-p5_2ss15TC20AC	XM_016647815.1	XM_016647815.1	AHK3	histidine kinase 3	3354-3374	2.5	GO:0000155(phosphorelay sensor kinase activity);GO:0000160(phosphorelay signal transduction system);GO:0004673(protein histidine kinase activity);GO:0004721(phosphoprotein phosphatase activity);GO:0005034(osmosensor activity);GO:0005515(protein binding);GO:0005789(endoplasmic reticulum membrane);GO:0005886(plasma membrane);GO:0006970(response to osmotic stress);GO:0009409(response to cold);GO:000…	ko04075(Plant hormone signal transduction)
osa-MIR5825-p5_2ss15TC20AC	XM_016626505.1	XM_016626505.1	At1g77330	1-aminocyclopropane-1-carboxylate oxidase 5	907-927	2	GO:0009693(ethylene biosynthetic process);GO:0051213(dioxygenase activity)	ko00270(Cysteine and methionine metabolism)
osa-MIR5825-p5_2ss15TC20AC	XM_016610988.1	XM_016610988.1	IPK2b	inositol polyphosphate multikinase	1537-1557	2.5	GO:0000823(inositol-1,4,5-trisphosphate 6-kinase activity);GO:0000824(inositol tetrakisphosphate 3-kinase activity);GO:0005524(ATP binding);GO:0005634(nucleus);GO:0005886(plasma membrane);GO:0006355(regulation of transcription, DNA-templated);GO:0008440(inositol-1,4,5-trisphosphate 3-kinase activity);GO:0009555(pollen development);GO:0009793(embryo development ending in seed dormancy);GO:0010183(…	ko00562(Inositol phosphate metabolism);ko04070(Phosphatidylinositol signaling system)
osa-MIR5825-p5_2ss15TC20AC	XM_016585883.1	XM_016585883.1	-	uncharacterized LOC103414975	1662-1682	2.5	-	ko00230(Purine metabolism);ko00240(Pyrimidine metabolism);ko03030(DNA replication);ko03410(Base excision repair);ko03420(Nucleotide excision repair);ko03430(Mismatch repair);ko03440(Homologous recombination)
osa-MIR5825-p5_2ss15TC20AC	XM_016585871.1	XM_016585871.1	-	uncharacterized LOC103414975	1662-1682	2.5	-	ko00230(Purine metabolism);ko00240(Pyrimidine metabolism);ko03030(DNA replication);ko03410(Base excision repair);ko03420(Nucleotide excision repair);ko03430(Mismatch repair);ko03440(Homologous recombination)
osa-MIR5825-p5_2ss15TC20AC	XM_016585877.1	XM_016585877.1	-	uncharacterized LOC103414975	1662-1682	2.5	-	ko00230(Purine metabolism);ko00240(Pyrimidine metabolism);ko03030(DNA replication);ko03410(Base excision repair);ko03420(Nucleotide excision repair);ko03430(Mismatch repair);ko03440(Homologous recombination)
osa-MIR5825-p5_2ss15TC20AC	XM_016585859.1	XM_016585859.1	-	-	339-359	2.5	-
osa-MIR5825-p5_2ss15TC20AC	XM_016612001.1	XM_016612001.1	At1g14600	uncharacterized protein LOC103984394	903-922	2	GO:0003677(DNA binding);GO:0003700(transcription factor activity, sequence-specific DNA binding);GO:0005634(nucleus);GO:0006351(transcription, DNA-templated);GO:0006355(regulation of transcription, DNA-templated)	ko03013(RNA transport)
osa-MIR5825-p5_2ss15TC20AC	XM_016612005.1	XM_016612005.1	At1g14600	uncharacterized protein LOC103984394	746-765	2	GO:0003677(DNA binding);GO:0003700(transcription factor activity, sequence-specific DNA binding);GO:0005634(nucleus);GO:0006351(transcription, DNA-templated);GO:0006355(regulation of transcription, DNA-templated)	ko03013(RNA transport)
osa-MIR5825-p5_2ss15TC20AC	XM_016612002.1	XM_016612002.1	At1g14600	uncharacterized protein LOC103984394	749-768	2	GO:0003677(DNA binding);GO:0003700(transcription factor activity, sequence-specific DNA binding);GO:0005634(nucleus);GO:0006351(transcription, DNA-templated);GO:0006355(regulation of transcription, DNA-templated)	ko03013(RNA transport)
osa-MIR5825-p5_2ss15TC20AC	XM_016612003.1	XM_016612003.1	At1g14600	uncharacterized protein LOC103984394	746-765	2	GO:0003677(DNA binding);GO:0003700(transcription factor activity, sequence-specific DNA binding);GO:0005634(nucleus);GO:0006351(transcription, DNA-templated);GO:0006355(regulation of transcription, DNA-templated)	ko03013(RNA transport)
osa-MIR5825-p5_2ss15TC20AC	XM_016612006.1	XM_016612006.1	At1g14600	uncharacterized protein LOC103984394	592-611	2	GO:0003677(DNA binding);GO:0003700(transcription factor activity, sequence-specific DNA binding);GO:0005634(nucleus);GO:0006351(transcription, DNA-templated);GO:0006355(regulation of transcription, DNA-templated)	ko03013(RNA transport)
osa-MIR5825-p5_2ss15TC20AC	XM_016612007.1	XM_016612007.1	At1g14600	uncharacterized protein LOC103984394	825-844	2	GO:0003677(DNA binding);GO:0003700(transcription factor activity, sequence-specific DNA binding);GO:0005634(nucleus);GO:0006351(transcription, DNA-templated);GO:0006355(regulation of transcription, DNA-templated)	ko03013(RNA transport)
osa-MIR5825-p5_2ss15TC20AC	XM_016612662.1	XM_016612662.1	PDR2	ATP-binding cassette sub-family G member 2	707-727	1.5	GO:0005886(plasma membrane);GO:0016021(integral component of membrane);GO:0042626(ATPase activity, coupled to transmembrane movement of substances)	ko02010(ABC transporters)
osa-MIR5825-p5_2ss15TC20AC	XM_016628419.1	XM_016628419.1	AHK3	histidine kinase 3	3341-3361	2.5	GO:0000155(phosphorelay sensor kinase activity);GO:0000160(phosphorelay signal transduction system);GO:0004673(protein histidine kinase activity);GO:0004721(phosphoprotein phosphatase activity);GO:0005034(osmosensor activity);GO:0005515(protein binding);GO:0005789(endoplasmic reticulum membrane);GO:0005886(plasma membrane);GO:0006970(response to osmotic stress);GO:0009409(response to cold);GO:000…	ko04075(Plant hormone signal transduction)
osa-MIR5825-p5_2ss15TC20AC	XM_016628421.1	XM_016628421.1	AHK3	histidine kinase 3	2474-2494	2.5	GO:0000155(phosphorelay sensor kinase activity);GO:0000160(phosphorelay signal transduction system);GO:0004673(protein histidine kinase activity);GO:0004721(phosphoprotein phosphatase activity);GO:0005034(osmosensor activity);GO:0005515(protein binding);GO:0005789(endoplasmic reticulum membrane);GO:0005886(plasma membrane);GO:0006970(response to osmotic stress);GO:0009409(response to cold);GO:000…	ko04075(Plant hormone signal transduction)
osa-MIR5825-p5_2ss15TC20AC	XM_016608192.1	XM_016608192.1	At1g77330	1-aminocyclopropane-1-carboxylate oxidase 5	937-957	2	GO:0009693(ethylene biosynthetic process);GO:0051213(dioxygenase activity)	ko00270(Cysteine and methionine metabolism)
osa-MIR5825-p5_2ss15TC20AC	XM_016652299.1	XM_016652299.1	-	uncharacterized LOC103414975	342-362	2.5	-	ko00230(Purine metabolism);ko00240(Pyrimidine metabolism);ko03030(DNA replication);ko03410(Base excision repair);ko03420(Nucleotide excision repair);ko03430(Mismatch repair);ko03440(Homologous recombination)
osa-MIR5825-p5_2ss15TC20AC	XM_016599424.1	XM_016599424.1	OFP3	uncharacterized LOC104595426	754-774	1.5	GO:0003677(DNA binding);GO:0005634(nucleus);GO:0006351(transcription, DNA-templated);GO:0045892(negative regulation of transcription, DNA-templated)	ko00500(Starch and sucrose metabolism);ko00460(Cyanoamino acid metabolism);ko00940(Phenylpropanoid biosynthesis)
osa-MIR5825-p5_2ss15TC20AC	XM_016599785.1	XM_016599785.1	LECRKS4	-	1387-1407	2.2	GO:0005886(plasma membrane);GO:0008150(biological_process);GO:0016021(integral component of membrane);GO:0030246(carbohydrate binding)
osa-MIR5825-p5_2ss15TC20AC	XM_016630630.1	XM_016630630.1	At2g25240	nuclear pore complex protein NUP98A-like	804-824	2.5	GO:0004867(serine-type endopeptidase inhibitor activity);GO:0005615(extracellular space)	ko03013(RNA transport)
osa-MIR5825-p5_2ss15TC20AC	XM_016630631.1	XM_016630631.1	-	nuclear pore complex protein NUP98A-like	57-77	2	GO:0004867(serine-type endopeptidase inhibitor activity);GO:0005615(extracellular space)	ko03013(RNA transport)
osa-MIR5825-p5_2ss15TC20AC	XM_016630510.1	XM_016630510.1	CALS3	glycosyl transferase	2680-2700	2.5	GO:0000148(1,3-beta-D-glucan synthase complex);GO:0003843(1,3-beta-D-glucan synthase activity);GO:0005886(plasma membrane)	ko00500(Starch and sucrose metabolism)
osa-MIR5825-p5_2ss15TC20AC	XM_016584465.1	XM_016584465.1	-	uncharacterized LOC103414975	335-355	2.5	GO:0003700(transcription factor activity, sequence-specific DNA binding);GO:0005634(nucleus);GO:0006355(regulation of transcription, DNA-templated);GO:0043565(sequence-specific DNA binding)	ko00230(Purine metabolism);ko00240(Pyrimidine metabolism);ko03030(DNA replication);ko03410(Base excision repair);ko03420(Nucleotide excision repair);ko03430(Mismatch repair);ko03440(Homologous recombination)
osa-MIR5825-p5_2ss15TC20AC	XM_016615543.1	XM_016615543.1	At3g20280	L-aspartate oxidase	2519-2540	2.5	GO:0003677(DNA binding);GO:0005634(nucleus);GO:0006355(regulation of transcription, DNA-templated);GO:0008270(zinc ion binding)	ko00250(Alanine, aspartate and glutamate metabolism);ko00760(Nicotinate and nicotinamide metabolism)
osa-MIR5825-p5_2ss15TC20AC	XM_016615538.1	XM_016615538.1	At3g20280	L-aspartate oxidase	2519-2540	2.5	GO:0003677(DNA binding);GO:0005634(nucleus);GO:0006355(regulation of transcription, DNA-templated);GO:0008270(zinc ion binding)	ko00250(Alanine, aspartate and glutamate metabolism);ko00760(Nicotinate and nicotinamide metabolism)
osa-MIR5825-p5_2ss15TC20AC	XM_016615539.1	XM_016615539.1	At3g20280	L-aspartate oxidase	2519-2540	2.5	GO:0003677(DNA binding);GO:0005634(nucleus);GO:0006355(regulation of transcription, DNA-templated);GO:0008270(zinc ion binding)	ko00250(Alanine, aspartate and glutamate metabolism);ko00760(Nicotinate and nicotinamide metabolism)
osa-MIR5825-p5_2ss15TC20AC	XM_016615540.1	XM_016615540.1	At3g20280	L-aspartate oxidase	2519-2540	2.5	GO:0003677(DNA binding);GO:0005634(nucleus);GO:0006355(regulation of transcription, DNA-templated);GO:0008270(zinc ion binding)	ko00250(Alanine, aspartate and glutamate metabolism);ko00760(Nicotinate and nicotinamide metabolism)
osa-MIR5825-p5_2ss15TC20AC	XM_016615542.1	XM_016615542.1	At3g20280	L-aspartate oxidase	2297-2318	2.5	GO:0003677(DNA binding);GO:0005634(nucleus);GO:0006355(regulation of transcription, DNA-templated);GO:0008270(zinc ion binding)	ko00250(Alanine, aspartate and glutamate metabolism);ko00760(Nicotinate and nicotinamide metabolism)
osa-MIR5825-p5_2ss15TC20AC	XM_016631747.1	XM_016631747.1	ATHB-13	NAD(P)-linked oxidoreductase superfamily protein	1319-1339	2.5	GO:0003677(DNA binding);GO:0003700(transcription factor activity, sequence-specific DNA binding);GO:0005634(nucleus);GO:0006351(transcription, DNA-templated);GO:0006355(regulation of transcription, DNA-templated);GO:0009744(response to sucrose);GO:0009965(leaf morphogenesis);GO:0043565(sequence-specific DNA binding);GO:0048826(cotyledon morphogenesis);GO:0080022(primary root development)	ko00750(Vitamin B6 metabolism)
osa-MIR5825-p5_2ss15TC20AC	XM_016616357.1	XM_016616357.1	PCMP-E13	Pentatricopeptide repeat superfamily protein isoform 1	818-838	2.5	GO:0003674(molecular_function);GO:0005739(mitochondrion);GO:0008150(biological_process)	ko01212(Fatty acid metabolism);ko00062(Fatty acid elongation)
osa-MIR5825-p5_2ss15TC20AC	XM_016601634.1	XM_016601634.1	GDCSP	glycine dehydrogenase (decarboxylating)	1669-1689	2.5	GO:0004375(glycine dehydrogenase );GO:0005739(mitochondrion);GO:0005829(cytosol);GO:0005960(glycine cleavage complex);GO:0016594(glycine binding);GO:0019464(glycine decarboxylation via glycine cleavage system)	ko01200(Carbon metabolism);ko00630(Glyoxylate and dicarboxylate metabolism);ko00260(Glycine, serine and threonine metabolism)
osa-MIR5825-p5_2ss15TC20AC	XM_016656882.1	XM_016656882.1	v1g238856	probable cinnamyl alcohol dehydrogenase 1	1336-1356	2.2	GO:0005737(cytoplasm);GO:0005777(peroxisome);GO:0005829(cytosol);GO:0008270(zinc ion binding);GO:0016491(oxidoreductase activity);GO:0055114(oxidation-reduction process)	ko00940(Phenylpropanoid biosynthesis)
osa-MIR5825-p5_2ss15TC20AC	XM_016657523.1	XM_016657523.1	ATG2	-	3119-3139	2.5	GO:0000045(autophagosome assembly);GO:0000407(pre-autophagosomal structure);GO:0000422(mitophagy);GO:0019898(extrinsic component of membrane);GO:0044804(nucleophagy)
osa-MIR5825-p5_2ss15TC20AC	XM_016635706.1	XM_016635706.1	CALS3	hypothetical protein	2662-2682	2.5	GO:0000148(1,3-beta-D-glucan synthase complex);GO:0003843(1,3-beta-D-glucan synthase activity);GO:0005886(plasma membrane)	ko00500(Starch and sucrose metabolism)
PC-5p-10208_389	XM_016647323.1	XM_016647323.1	BCE2	lipoamide acyltransferase component of branched-chain alpha-keto acid dehydrogenase complex, mitochondrial	1729-1750	2.5	GO:0003826(alpha-ketoacid dehydrogenase activity);GO:0004147(dihydrolipoamide branched chain acyltransferase activity);GO:0005739(mitochondrion);GO:0005759(mitochondrial matrix);GO:0006633(fatty acid biosynthetic process);GO:0008270(zinc ion binding);GO:0009646(response to absence of light);GO:0009744(response to sucrose);GO:0016407(acetyltransferase activity);GO:0043617(cellular response to sucr…	ko00640(Propanoate metabolism);ko00280(Valine, leucine and isoleucine degradation)
PC-5p-10208_389	XM_016604051.1	XM_016604051.1	BCE2	lipoamide acyltransferase component of branched-chain alpha-keto acid dehydrogenase complex, mitochondrial	1662-1683	2.5	GO:0003826(alpha-ketoacid dehydrogenase activity);GO:0004147(dihydrolipoamide branched chain acyltransferase activity);GO:0005739(mitochondrion);GO:0005759(mitochondrial matrix);GO:0006633(fatty acid biosynthetic process);GO:0008270(zinc ion binding);GO:0009646(response to absence of light);GO:0009744(response to sucrose);GO:0016407(acetyltransferase activity);GO:0043617(cellular response to sucr…	ko00640(Propanoate metabolism);ko00280(Valine, leucine and isoleucine degradation)
gma-MIR4995-p3	XM_016593617.1	XM_016593617.1	-	-	520-538	2.2	-
gma-MIR4995-p3	XM_016608988.1	XM_016608988.1	-	transcription initiation factor IIF subunit beta-like	732-750	2.2	GO:0005886(plasma membrane)	ko03022(Basal transcription factors)
gma-MIR4995-p3	XM_016652577.1	XM_016652577.1	ARP6	actin	145-163	2	GO:0005200(structural constituent of cytoskeleton);GO:0005515(protein binding);GO:0005634(nucleus);GO:0005737(cytoplasm);GO:0006338(chromatin remodeling);GO:0006355(regulation of transcription, DNA-templated);GO:0006952(defense response);GO:0007275(multicellular organism development);GO:0008283(cell proliferation);GO:0009266(response to temperature stimulus);GO:0009910(negative regulation of flow…	ko04145(Phagosome)
gma-MIR4995-p3	XM_016578758.1	XM_016578758.1	NPF4.6	-	1907-1925	1.8	GO:0005215(transporter activity);GO:0005509(calcium ion binding);GO:0005886(plasma membrane);GO:0009624(response to nematode);GO:0010119(regulation of stomatal movement);GO:0015293(symporter activity);GO:0016020(membrane);GO:0016021(integral component of membrane);GO:0042128(nitrate assimilation);GO:0080168(abscisic acid transport);GO:0090440(abscisic acid transporter activity)
gma-MIR4995-p3	XM_016657107.1	XM_016657107.1	Dd	-	459-477	2.2	GO:0004721(phosphoprotein phosphatase activity)
gma-MIR4995-p3	XM_016657101.1	XM_016657101.1	Dd	-	442-460	2.2	GO:0004721(phosphoprotein phosphatase activity)
gma-MIR4995-p3	XM_016578852.1	XM_016578852.1	NPF4.6	-	1586-1604	2.5	GO:0005215(transporter activity);GO:0005509(calcium ion binding);GO:0005886(plasma membrane);GO:0009624(response to nematode);GO:0010119(regulation of stomatal movement);GO:0015293(symporter activity);GO:0016020(membrane);GO:0016021(integral component of membrane);GO:0042128(nitrate assimilation);GO:0080168(abscisic acid transport);GO:0090440(abscisic acid transporter activity)
gma-MIR4995-p3	XM_016610592.1	XM_016610592.1	PCMP-E96	pentatricopeptide repeat-containing protein At2g04860	3465-3483	2.5	GO:0005739(mitochondrion);GO:0008150(biological_process)	ko00500(Starch and sucrose metabolism)
gma-MIR4995-p3	XM_016610799.1	XM_016610799.1	-	-	1889-1907	2.5	GO:0000151(ubiquitin ligase complex);GO:0000209(protein polyubiquitination);GO:0005737(cytoplasm);GO:0031624(ubiquitin conjugating enzyme binding);GO:0032436(positive regulation of proteasomal ubiquitin-dependent protein catabolic process);GO:0042787(protein ubiquitination involved in ubiquitin-dependent protein catabolic process);GO:0061630(ubiquitin protein ligase activity)
gma-MIR4995-p3	XM_016610800.1	XM_016610800.1	-	-	1770-1788	2.5	GO:0000151(ubiquitin ligase complex);GO:0000209(protein polyubiquitination);GO:0005737(cytoplasm);GO:0031624(ubiquitin conjugating enzyme binding);GO:0032436(positive regulation of proteasomal ubiquitin-dependent protein catabolic process);GO:0042787(protein ubiquitination involved in ubiquitin-dependent protein catabolic process);GO:0061630(ubiquitin protein ligase activity)
gma-MIR4995-p3	XM_016592333.1	XM_016592333.1	-	-	52-70	2.5	GO:0005737(cytoplasm);GO:0030001(metal ion transport);GO:0046914(transition metal ion binding);GO:0046916(cellular transition metal ion homeostasis)
gma-MIR4995-p3	XM_016613117.1	XM_016613117.1	-	-	1878-1896	2	GO:0000151(ubiquitin ligase complex);GO:0000209(protein polyubiquitination);GO:0005737(cytoplasm);GO:0031624(ubiquitin conjugating enzyme binding);GO:0032436(positive regulation of proteasomal ubiquitin-dependent protein catabolic process);GO:0042787(protein ubiquitination involved in ubiquitin-dependent protein catabolic process);GO:0061630(ubiquitin protein ligase activity)
gma-MIR4995-p3	XM_016613300.1	XM_016613300.1	DYNLL1	-	218-236	2.5	GO:0003777(microtubule motor activity);GO:0005737(cytoplasm);GO:0005875(microtubule associated complex);GO:0007017(microtubule-based process)
gma-MIR4995-p3	XM_016613789.1	XM_016613789.1	-	uncharacterized LOC106392594	5529-5547	2.5	GO:0003964(RNA-directed DNA polymerase activity);GO:0006310(DNA recombination);GO:0009036(Type II site-specific deoxyribonuclease activity);GO:0032197(transposition, RNA-mediated);GO:0032199(reverse transcription involved in RNA-mediated transposition);GO:0046872(metal ion binding);GO:0090305(nucleic acid phosphodiester bond hydrolysis)	ko01210(2-Oxocarboxylic acid metabolism);ko01230(Biosynthesis of amino acids);ko00220(Arginine biosynthesis)
gma-MIR4995-p3	XM_016618642.1	XM_016618642.1	At4g02290	endoglucanase 23-like	462-480	2.5	GO:0004553(hydrolase activity, hydrolyzing O-glycosyl compounds);GO:0005576(extracellular region);GO:0008810(cellulase activity);GO:0030245(cellulose catabolic process);GO:0071555(cell wall organization)	ko00500(Starch and sucrose metabolism)
gma-MIR4995-p3	XM_016618648.1	XM_016618648.1	At4g02290	endoglucanase 23-like	462-480	2.5	GO:0004553(hydrolase activity, hydrolyzing O-glycosyl compounds);GO:0005576(extracellular region);GO:0008810(cellulase activity);GO:0030245(cellulose catabolic process);GO:0071555(cell wall organization)	ko00500(Starch and sucrose metabolism)
gma-MIR4995-p3	XM_016618652.1	XM_016618652.1	At4g02290	endoglucanase 23-like	396-414	2.5	GO:0004553(hydrolase activity, hydrolyzing O-glycosyl compounds);GO:0005576(extracellular region);GO:0008810(cellulase activity);GO:0030245(cellulose catabolic process);GO:0071555(cell wall organization)	ko00500(Starch and sucrose metabolism)
gma-MIR4995-p3	XM_016631299.1	XM_016631299.1	At4g17486	-	888-907	2.5	GO:0003674(molecular_function);GO:0005737(cytoplasm);GO:0008150(biological_process)
gma-MIR4995-p3	XM_016631298.1	XM_016631298.1	At4g17486	-	863-882	2.5	GO:0003674(molecular_function);GO:0005737(cytoplasm);GO:0008150(biological_process)
gma-MIR4995-p3	XM_016654452.1	XM_016654452.1	MENG	2-phytyl-1	1311-1329	2.5	GO:0005737(cytoplasm);GO:0008757(S-adenosylmethionine-dependent methyltransferase activity);GO:0032259(methylation)	ko00130(Ubiquinone and other terpenoid-quinone biosynthesis)
gma-MIR4995-p3	XM_016586444.1	XM_016586444.1	-	-	822-840	2.2	GO:0005886(plasma membrane)
gma-MIR4995-p3	XM_016586445.1	XM_016586445.1	-	-	788-806	2.2	GO:0005886(plasma membrane)
gma-MIR4995-p3	XM_016639765.1	XM_016639765.1	-	-	771-789	1.2	GO:0005886(plasma membrane)
gma-MIR4995-p3	XM_016639766.1	XM_016639766.1	-	-	659-677	1.2	-
gma-MIR4995-p3	XM_016639763.1	XM_016639763.1	-	-	772-790	1.2	GO:0005886(plasma membrane)
gma-MIR4995-p3	XM_016639764.1	XM_016639764.1	-	-	772-790	1.2	GO:0005886(plasma membrane)
gma-MIR4995-p3	XM_016639937.1	XM_016639937.1	LTI65	-	787-805	2.2	GO:0003674(molecular_function);GO:0005737(cytoplasm);GO:0009409(response to cold);GO:0009414(response to water deprivation);GO:0009651(response to salt stress);GO:0009737(response to abscisic acid);GO:0009738(abscisic acid-activated signaling pathway);GO:0010150(leaf senescence)
gma-MIR4995-p3	XM_016633777.1	XM_016633777.1	NPF4.6	-	1805-1823	2.2	GO:0005215(transporter activity);GO:0005509(calcium ion binding);GO:0005886(plasma membrane);GO:0009624(response to nematode);GO:0010119(regulation of stomatal movement);GO:0015293(symporter activity);GO:0016020(membrane);GO:0016021(integral component of membrane);GO:0042128(nitrate assimilation);GO:0080168(abscisic acid transport);GO:0090440(abscisic acid transporter activity)
gma-MIR4995-p3	XM_016656677.1	XM_016656677.1	PDR1	ATP-binding cassette sub-family G member 2	3942-3959	2.5	GO:0005886(plasma membrane);GO:0016021(integral component of membrane);GO:0042626(ATPase activity, coupled to transmembrane movement of substances)	ko02010(ABC transporters)
gma-MIR4995-p3	XM_016640863.1	XM_016640863.1	DYNLL1	-	245-263	2.5	GO:0003777(microtubule motor activity);GO:0005737(cytoplasm);GO:0005875(microtubule associated complex);GO:0007017(microtubule-based process)
gma-MIR4995-p3	XM_016657349.1	XM_016657349.1	At4g17486	-	805-824	2.5	GO:0003674(molecular_function);GO:0005737(cytoplasm);GO:0008150(biological_process)
gma-MIR4995-p3	XM_016657353.1	XM_016657353.1	At4g17486	-	805-824	2.5	GO:0003674(molecular_function);GO:0005737(cytoplasm);GO:0008150(biological_process)
gma-MIR4995-p3	XM_016657351.1	XM_016657351.1	At4g17486	-	631-650	2.5	GO:0003674(molecular_function);GO:0005737(cytoplasm);GO:0008150(biological_process)
gma-MIR4995-p3	XM_016606046.1	XM_016606046.1	EMB8	-	379-397	2.5	GO:0005634(nucleus);GO:0005737(cytoplasm);GO:0008150(biological_process)
gma-MIR4995-p3	XM_016643230.1	XM_016643230.1	PAP4	-	579-597	2.5	GO:0005198(structural molecule activity);GO:0008150(biological_process);GO:0009507(chloroplast);GO:0009534(chloroplast thylakoid);GO:0009535(chloroplast thylakoid membrane);GO:0010287(plastoglobule)
gma-MIR4995-p3	XM_016607242.1	XM_016607242.1	PSRP2	28 kDa ribonucleoprotein	640-658	2.2	GO:0000166(nucleotide binding);GO:0003676(nucleic acid binding);GO:0003723(RNA binding);GO:0005634(nucleus);GO:0008150(biological_process);GO:0009507(chloroplast);GO:0009570(chloroplast stroma)	ko03013(RNA transport);ko03015(mRNA surveillance pathway);ko03018(RNA degradation)
gma-MIR4995-p3	XM_016621594.1	XM_016621594.1	PSRP2	28 kDa ribonucleoprotein	660-678	2.2	GO:0000166(nucleotide binding);GO:0003676(nucleic acid binding);GO:0003723(RNA binding);GO:0005634(nucleus);GO:0008150(biological_process);GO:0009507(chloroplast);GO:0009570(chloroplast stroma)	ko03013(RNA transport);ko03015(mRNA surveillance pathway);ko03018(RNA degradation)
gma-MIR4995-p3	XM_016622655.1	XM_016622655.1	PDR1	ATP-binding cassette sub-family G member 2	3954-3971	2.5	GO:0005886(plasma membrane);GO:0016021(integral component of membrane);GO:0042626(ATPase activity, coupled to transmembrane movement of substances)	ko02010(ABC transporters)
ath-miR396b-5p_R+1	XM_016607945.1	XM_016607945.1	pakG	mitogen-activated protein kinase kinase kinase 1-like	862-882	2	GO:0004702(receptor signaling protein serine/threonine kinase activity);GO:0005737(cytoplasm)	ko04626(Plant-pathogen interaction)
ath-miR396b-5p_R+1	XM_016608206.1	XM_016608206.1	CASP	-	749-769	2.5	GO:0005768(endosome);GO:0005794(Golgi apparatus);GO:0005802(trans-Golgi network);GO:0006891(intra-Golgi vesicle-mediated transport);GO:0016021(integral component of membrane);GO:0030173(integral component of Golgi membrane)
ath-miR396b-5p_R+1	XM_016646143.1	XM_016646143.1	-	uncharacterized LOC103401222	149-170	2	-	ko01200(Carbon metabolism);ko01230(Biosynthesis of amino acids);ko00920(Sulfur metabolism);ko00270(Cysteine and methionine metabolism)
ath-miR396b-5p_R+1	XM_016578417.1	XM_016578417.1	-	-	330-351	1.2	-
ath-miR396b-5p_R+1	XM_016579768.1	XM_016579768.1	At1g09580	emp24/gp25L/p24 family of membrane trafficking proteins (ISS)	811-832	2.2	GO:0005789(endoplasmic reticulum membrane);GO:0006886(intracellular protein transport);GO:0008320(protein transmembrane transporter activity);GO:0015031(protein transport);GO:0016020(membrane);GO:0016021(integral component of membrane);GO:0016192(vesicle-mediated transport)	ko00563(Glycosylphosphatidylinositol)
ath-miR396b-5p_R+1	XM_016579768.1	XM_016579768.1	At1g09580	emp24/gp25L/p24 family of membrane trafficking proteins (ISS)	495-516	2.2	GO:0005789(endoplasmic reticulum membrane);GO:0006886(intracellular protein transport);GO:0008320(protein transmembrane transporter activity);GO:0015031(protein transport);GO:0016020(membrane);GO:0016021(integral component of membrane);GO:0016192(vesicle-mediated transport)	ko00563(Glycosylphosphatidylinositol)
ath-miR396b-5p_R+1	XM_016611139.1	XM_016611139.1	EIF2D	-	129-151	2.5	GO:0003743(translation initiation factor activity);GO:0006413(translational initiation)
ath-miR396b-5p_R+1	XM_016611138.1	XM_016611138.1	EIF2D	-	128-150	2.5	GO:0003743(translation initiation factor activity);GO:0006413(translational initiation)
ath-miR396b-5p_R+1	XM_016580163.1	XM_016580163.1	XYLA	xylose isomerase	778-798	2.5	GO:0005737(cytoplasm);GO:0016020(membrane)	ko00040(Pentose and glucuronate interconversions);ko00051(Fructose and mannose metabolism)
ath-miR396b-5p_R+1	XM_016627487.1	XM_016627487.1	XYLA	xylose isomerase	754-774	2.5	GO:0005737(cytoplasm);GO:0016020(membrane)	ko00040(Pentose and glucuronate interconversions);ko00051(Fructose and mannose metabolism)
ath-miR396b-5p_R+1	XM_016627667.1	XM_016627667.1	RPL6	50S ribosomal protein L6	392-413	2.5	GO:0002181(cytoplasmic translation);GO:0003723(RNA binding);GO:0003735(structural constituent of ribosome)	ko03010(Ribosome)
ath-miR396b-5p_R+1	XM_016581248.1	XM_016581248.1	-	-	119-139	2.5	GO:0005634(nucleus);GO:0005737(cytoplasm);GO:0005829(cytosol);GO:0005886(plasma membrane);GO:0009651(response to salt stress);GO:0016787(hydrolase activity);GO:0048046(apoplast)
ath-miR396b-5p_R+1	XM_016612471.1	XM_016612471.1	-	uncharacterized LOC103401222	368-389	2	GO:0005886(plasma membrane);GO:0016021(integral component of membrane);GO:0042626(ATPase activity, coupled to transmembrane movement of substances)	ko01200(Carbon metabolism);ko01230(Biosynthesis of amino acids);ko00920(Sulfur metabolism);ko00270(Cysteine and methionine metabolism)
ath-miR396b-5p_R+1	XM_016651470.1	XM_016651470.1	CASP	-	750-770	1.5	GO:0005768(endosome);GO:0005794(Golgi apparatus);GO:0005802(trans-Golgi network);GO:0006891(intra-Golgi vesicle-mediated transport);GO:0016021(integral component of membrane);GO:0030173(integral component of Golgi membrane)
ath-miR396b-5p_R+1	XM_016614855.1	XM_016614855.1	ACA13	plasma membrane H+-ATPase	2134-2154	2.5	GO:0005388(calcium-transporting ATPase activity);GO:0005887(integral component of plasma membrane);GO:0043231(intracellular membrane-bounded organelle)	ko00190(Oxidative phosphorylation)
ath-miR396b-5p_R+1	XM_016653290.1	XM_016653290.1	EIF2D	-	127-149	2.5	GO:0003743(translation initiation factor activity);GO:0006413(translational initiation)
ath-miR396b-5p_R+1	XM_016653289.1	XM_016653289.1	EIF2D	-	127-149	2.5	GO:0003743(translation initiation factor activity);GO:0006413(translational initiation)
ath-miR396b-5p_R+1	XM_016602071.1	XM_016602071.1	-	enoyl-[acyl-carrier-protein] reductase [NADH] 2	684-704	2.5	GO:0004318(enoyl-[acyl-carrier-protein] reductase );GO:0005507(copper ion binding);GO:0005835(fatty acid synthase complex);GO:0006633(fatty acid biosynthetic process);GO:0009507(chloroplast);GO:0009570(chloroplast stroma);GO:0009579(thylakoid);GO:0009941(chloroplast envelope);GO:0016491(oxidoreductase activity);GO:0016631(enoyl-[acyl-carrier-protein] reductase activity);GO:0055114(oxidation-reduc…	ko01212(Fatty acid metabolism);ko00061(Fatty acid biosynthesis);ko00780(Biotin metabolism)
ath-miR396b-5p_R+1	XM_016602340.1	XM_016602340.1	RD21B	cysteine protease	513-534	1.8	GO:0004197(cysteine-type endopeptidase activity);GO:0005615(extracellular space);GO:0005764(lysosome);GO:0051603(proteolysis involved in cellular protein catabolic process)	ko04145(Phagosome)
ath-miR396b-5p_R+1	XM_016602465.1	XM_016602465.1	-	-	600-621	2.2	-
ath-miR396b-5p_R+1	XM_016602559.1	XM_016602559.1	-	uncharacterized LOC103401222	5-26	2	GO:0005886(plasma membrane);GO:0016021(integral component of membrane);GO:0042626(ATPase activity, coupled to transmembrane movement of substances)	ko01200(Carbon metabolism);ko01230(Biosynthesis of amino acids);ko00920(Sulfur metabolism);ko00270(Cysteine and methionine metabolism)
ath-miR396b-5p_R+1	XM_016655586.1	XM_016655586.1	PRMT5	protein arginine N-methyltransferase 1.5	1987-2008	2.5	GO:0005634(nucleus);GO:0005829(cytosol);GO:0006355(regulation of transcription, DNA-templated);GO:0008469(histone-arginine N-methyltransferase activity);GO:0019918(peptidyl-arginine methylation, to symmetrical-dimethyl arginine)	ko03013(RNA transport)
ath-miR396b-5p_R+1	XM_016618324.1	XM_016618324.1	RD21A	cysteine protease	529-550	1.8	GO:0004197(cysteine-type endopeptidase activity);GO:0005615(extracellular space);GO:0005764(lysosome);GO:0051603(proteolysis involved in cellular protein catabolic process)	ko04145(Phagosome)
ath-miR396b-5p_R+1	XM_016635929.1	XM_016635929.1	-	uncharacterized LOC102702646	115-135	2.5	GO:0004596(peptide alpha-N-acetyltransferase activity);GO:0005737(cytoplasm);GO:0017196(N-terminal peptidyl-methionine acetylation)	ko03008(Ribosome biogenesis in eukaryotes)
ath-miR396b-5p_R+1	XM_016642478.1	XM_016642478.1	-	-	115-135	2.5	-
ath-miR396b-5p_R+1	XM_016658753.1	XM_016658753.1	RT	UDP-Glycosyltransferase superfamily protein	1555-1576	2.5	GO:0009813(flavonoid biosynthetic process);GO:0043231(intracellular membrane-bounded organelle);GO:0052696(flavonoid glucuronidation);GO:0080043(quercetin 3-O-glucosyltransferase activity);GO:0080044(quercetin 7-O-glucosyltransferase activity)	ko00942(Anthocyanin biosynthesis)
ath-miR396b-5p_R+1	XM_016659073.1	XM_016659073.1	DRM2	DNA (cytosine-5-)-methyltransferase	1443-1465	2.5	GO:0003677(DNA binding);GO:0003886(DNA );GO:0005515(protein binding);GO:0005634(nucleus);GO:0005654(nucleoplasm);GO:0006306(DNA methylation);GO:0008170(N-methyltransferase activity);GO:0016458(gene silencing);GO:0050832(defense response to fungus);GO:0051567(histone H3-K9 methylation)	ko00270(Cysteine and methionine metabolism)
ath-miR396b-5p_R+1	XM_016659077.1	XM_016659077.1	DRM2	DNA (cytosine-5-)-methyltransferase	1443-1465	2.5	GO:0003677(DNA binding);GO:0003886(DNA );GO:0005515(protein binding);GO:0005634(nucleus);GO:0005654(nucleoplasm);GO:0006306(DNA methylation);GO:0008170(N-methyltransferase activity);GO:0016458(gene silencing);GO:0050832(defense response to fungus);GO:0051567(histone H3-K9 methylation)	ko00270(Cysteine and methionine metabolism)
ath-miR396b-5p_R+1	XM_016659076.1	XM_016659076.1	DRM2	DNA (cytosine-5-)-methyltransferase	1443-1465	2.5	GO:0003677(DNA binding);GO:0003886(DNA );GO:0005515(protein binding);GO:0005634(nucleus);GO:0005654(nucleoplasm);GO:0006306(DNA methylation);GO:0008170(N-methyltransferase activity);GO:0016458(gene silencing);GO:0050832(defense response to fungus);GO:0051567(histone H3-K9 methylation)	ko00270(Cysteine and methionine metabolism)
ath-miR396b-5p_R+1	XM_016659075.1	XM_016659075.1	DRM2	DNA (cytosine-5-)-methyltransferase	1443-1465	2.5	GO:0003677(DNA binding);GO:0003886(DNA );GO:0005515(protein binding);GO:0005634(nucleus);GO:0005654(nucleoplasm);GO:0006306(DNA methylation);GO:0008170(N-methyltransferase activity);GO:0016458(gene silencing);GO:0050832(defense response to fungus);GO:0051567(histone H3-K9 methylation)	ko00270(Cysteine and methionine metabolism)
ath-miR396b-5p_R+1	XM_016620945.1	XM_016620945.1	-	uncharacterized LOC103401222	333-354	2	GO:0005886(plasma membrane);GO:0016021(integral component of membrane);GO:0042626(ATPase activity, coupled to transmembrane movement of substances)	ko01200(Carbon metabolism);ko01230(Biosynthesis of amino acids);ko00920(Sulfur metabolism);ko00270(Cysteine and methionine metabolism)
ath-miR396b-5p_R+1	XM_016590407.1	XM_016590407.1	-	-	912-933	2.2	-
ath-miR396b-5p_R+1	XM_016621525.1	XM_016621525.1	-	enoyl-[acyl-carrier-protein] reductase [NADH] 2	756-776	2.5	GO:0004318(enoyl-[acyl-carrier-protein] reductase );GO:0005507(copper ion binding);GO:0005835(fatty acid synthase complex);GO:0006633(fatty acid biosynthetic process);GO:0009507(chloroplast);GO:0009570(chloroplast stroma);GO:0009579(thylakoid);GO:0009941(chloroplast envelope);GO:0016491(oxidoreductase activity);GO:0016631(enoyl-[acyl-carrier-protein] reductase activity);GO:0055114(oxidation-reduc…	ko01212(Fatty acid metabolism);ko00061(Fatty acid biosynthesis);ko00780(Biotin metabolism)
ath-miR396b-5p_R+1	XM_016621526.1	XM_016621526.1	-	enoyl-[acyl-carrier-protein] reductase [NADH] 2	792-812	2.5	GO:0004318(enoyl-[acyl-carrier-protein] reductase );GO:0005507(copper ion binding);GO:0005835(fatty acid synthase complex);GO:0006633(fatty acid biosynthetic process);GO:0009507(chloroplast);GO:0009570(chloroplast stroma);GO:0009579(thylakoid);GO:0009941(chloroplast envelope);GO:0016491(oxidoreductase activity);GO:0016631(enoyl-[acyl-carrier-protein] reductase activity);GO:0055114(oxidation-reduc…	ko01212(Fatty acid metabolism);ko00061(Fatty acid biosynthesis);ko00780(Biotin metabolism)
ath-miR396b-5p_R+1	XM_016621731.1	XM_016621731.1	AGL28	D-3-phosphoglycerate dehydrogenase	87-108	2.5	GO:0003677(DNA binding);GO:0003700(transcription factor activity, sequence-specific DNA binding);GO:0005634(nucleus);GO:0006351(transcription, DNA-templated);GO:0006355(regulation of transcription, DNA-templated);GO:0009911(positive regulation of flower development);GO:0046983(protein dimerization activity)	ko01200(Carbon metabolism);ko01230(Biosynthesis of amino acids);ko00260(Glycine, serine and threonine metabolism)
ath-miR396b-5p_R+1	XM_016622490.1	XM_016622490.1	OEP64	casein kinase II beta chain 2	310-331	2.5	GO:0009507(chloroplast);GO:0009536(plastid);GO:0009941(chloroplast envelope);GO:0015031(protein transport);GO:0016884(carbon-nitrogen ligase activity, with glutamine as amido-N-donor);GO:0031359(integral component of chloroplast outer membrane)	ko03008(Ribosome biogenesis in eukaryotes);ko04712(Circadian rhythm - plant)
sly-miR396b_R+1	XM_016607945.1	XM_016607945.1	pakG	mitogen-activated protein kinase kinase kinase 1-like	862-882	2	GO:0004702(receptor signaling protein serine/threonine kinase activity);GO:0005737(cytoplasm)	ko04626(Plant-pathogen interaction)
sly-miR396b_R+1	XM_016608206.1	XM_016608206.1	CASP	-	749-769	2.5	GO:0005768(endosome);GO:0005794(Golgi apparatus);GO:0005802(trans-Golgi network);GO:0006891(intra-Golgi vesicle-mediated transport);GO:0016021(integral component of membrane);GO:0030173(integral component of Golgi membrane)
sly-miR396b_R+1	XM_016646143.1	XM_016646143.1	-	uncharacterized LOC103401222	149-170	2	-	ko01200(Carbon metabolism);ko01230(Biosynthesis of amino acids);ko00920(Sulfur metabolism);ko00270(Cysteine and methionine metabolism)
sly-miR396b_R+1	XM_016578417.1	XM_016578417.1	-	-	330-351	1.2	-
sly-miR396b_R+1	XM_016579768.1	XM_016579768.1	At1g09580	emp24/gp25L/p24 family of membrane trafficking proteins (ISS)	811-832	2.2	GO:0005789(endoplasmic reticulum membrane);GO:0006886(intracellular protein transport);GO:0008320(protein transmembrane transporter activity);GO:0015031(protein transport);GO:0016020(membrane);GO:0016021(integral component of membrane);GO:0016192(vesicle-mediated transport)	ko00563(Glycosylphosphatidylinositol)
sly-miR396b_R+1	XM_016579768.1	XM_016579768.1	At1g09580	emp24/gp25L/p24 family of membrane trafficking proteins (ISS)	495-516	2.2	GO:0005789(endoplasmic reticulum membrane);GO:0006886(intracellular protein transport);GO:0008320(protein transmembrane transporter activity);GO:0015031(protein transport);GO:0016020(membrane);GO:0016021(integral component of membrane);GO:0016192(vesicle-mediated transport)	ko00563(Glycosylphosphatidylinositol)
sly-miR396b_R+1	XM_016611139.1	XM_016611139.1	EIF2D	-	129-151	2.5	GO:0003743(translation initiation factor activity);GO:0006413(translational initiation)
sly-miR396b_R+1	XM_016611138.1	XM_016611138.1	EIF2D	-	128-150	2.5	GO:0003743(translation initiation factor activity);GO:0006413(translational initiation)
sly-miR396b_R+1	XM_016580163.1	XM_016580163.1	XYLA	xylose isomerase	778-798	2.5	GO:0005737(cytoplasm);GO:0016020(membrane)	ko00040(Pentose and glucuronate interconversions);ko00051(Fructose and mannose metabolism)
sly-miR396b_R+1	XM_016627487.1	XM_016627487.1	XYLA	xylose isomerase	754-774	2.5	GO:0005737(cytoplasm);GO:0016020(membrane)	ko00040(Pentose and glucuronate interconversions);ko00051(Fructose and mannose metabolism)
sly-miR396b_R+1	XM_016627667.1	XM_016627667.1	RPL6	50S ribosomal protein L6	392-413	2.5	GO:0002181(cytoplasmic translation);GO:0003723(RNA binding);GO:0003735(structural constituent of ribosome)	ko03010(Ribosome)
sly-miR396b_R+1	XM_016581248.1	XM_016581248.1	-	-	119-139	2.5	GO:0005634(nucleus);GO:0005737(cytoplasm);GO:0005829(cytosol);GO:0005886(plasma membrane);GO:0009651(response to salt stress);GO:0016787(hydrolase activity);GO:0048046(apoplast)
sly-miR396b_R+1	XM_016612471.1	XM_016612471.1	-	uncharacterized LOC103401222	368-389	2	GO:0005886(plasma membrane);GO:0016021(integral component of membrane);GO:0042626(ATPase activity, coupled to transmembrane movement of substances)	ko01200(Carbon metabolism);ko01230(Biosynthesis of amino acids);ko00920(Sulfur metabolism);ko00270(Cysteine and methionine metabolism)
sly-miR396b_R+1	XM_016651470.1	XM_016651470.1	CASP	-	750-770	1.5	GO:0005768(endosome);GO:0005794(Golgi apparatus);GO:0005802(trans-Golgi network);GO:0006891(intra-Golgi vesicle-mediated transport);GO:0016021(integral component of membrane);GO:0030173(integral component of Golgi membrane)
sly-miR396b_R+1	XM_016614855.1	XM_016614855.1	ACA13	plasma membrane H+-ATPase	2134-2154	2.5	GO:0005388(calcium-transporting ATPase activity);GO:0005887(integral component of plasma membrane);GO:0043231(intracellular membrane-bounded organelle)	ko00190(Oxidative phosphorylation)
sly-miR396b_R+1	XM_016653290.1	XM_016653290.1	EIF2D	-	127-149	2.5	GO:0003743(translation initiation factor activity);GO:0006413(translational initiation)
sly-miR396b_R+1	XM_016653289.1	XM_016653289.1	EIF2D	-	127-149	2.5	GO:0003743(translation initiation factor activity);GO:0006413(translational initiation)
sly-miR396b_R+1	XM_016602071.1	XM_016602071.1	-	enoyl-[acyl-carrier-protein] reductase [NADH] 2	684-704	2.5	GO:0004318(enoyl-[acyl-carrier-protein] reductase );GO:0005507(copper ion binding);GO:0005835(fatty acid synthase complex);GO:0006633(fatty acid biosynthetic process);GO:0009507(chloroplast);GO:0009570(chloroplast stroma);GO:0009579(thylakoid);GO:0009941(chloroplast envelope);GO:0016491(oxidoreductase activity);GO:0016631(enoyl-[acyl-carrier-protein] reductase activity);GO:0055114(oxidation-reduc…	ko01212(Fatty acid metabolism);ko00061(Fatty acid biosynthesis);ko00780(Biotin metabolism)
sly-miR396b_R+1	XM_016602340.1	XM_016602340.1	RD21B	cysteine protease	513-534	1.8	GO:0004197(cysteine-type endopeptidase activity);GO:0005615(extracellular space);GO:0005764(lysosome);GO:0051603(proteolysis involved in cellular protein catabolic process)	ko04145(Phagosome)
sly-miR396b_R+1	XM_016602465.1	XM_016602465.1	-	-	600-621	2.2	-
sly-miR396b_R+1	XM_016602559.1	XM_016602559.1	-	uncharacterized LOC103401222	5-26	2	GO:0005886(plasma membrane);GO:0016021(integral component of membrane);GO:0042626(ATPase activity, coupled to transmembrane movement of substances)	ko01200(Carbon metabolism);ko01230(Biosynthesis of amino acids);ko00920(Sulfur metabolism);ko00270(Cysteine and methionine metabolism)
sly-miR396b_R+1	XM_016655586.1	XM_016655586.1	PRMT5	protein arginine N-methyltransferase 1.5	1987-2008	2.5	GO:0005634(nucleus);GO:0005829(cytosol);GO:0006355(regulation of transcription, DNA-templated);GO:0008469(histone-arginine N-methyltransferase activity);GO:0019918(peptidyl-arginine methylation, to symmetrical-dimethyl arginine)	ko03013(RNA transport)
sly-miR396b_R+1	XM_016618324.1	XM_016618324.1	RD21A	cysteine protease	529-550	1.8	GO:0004197(cysteine-type endopeptidase activity);GO:0005615(extracellular space);GO:0005764(lysosome);GO:0051603(proteolysis involved in cellular protein catabolic process)	ko04145(Phagosome)
sly-miR396b_R+1	XM_016635929.1	XM_016635929.1	-	uncharacterized LOC102702646	115-135	2.5	GO:0004596(peptide alpha-N-acetyltransferase activity);GO:0005737(cytoplasm);GO:0017196(N-terminal peptidyl-methionine acetylation)	ko03008(Ribosome biogenesis in eukaryotes)
sly-miR396b_R+1	XM_016642478.1	XM_016642478.1	-	-	115-135	2.5	-
sly-miR396b_R+1	XM_016658753.1	XM_016658753.1	RT	UDP-Glycosyltransferase superfamily protein	1555-1576	2.5	GO:0009813(flavonoid biosynthetic process);GO:0043231(intracellular membrane-bounded organelle);GO:0052696(flavonoid glucuronidation);GO:0080043(quercetin 3-O-glucosyltransferase activity);GO:0080044(quercetin 7-O-glucosyltransferase activity)	ko00942(Anthocyanin biosynthesis)
sly-miR396b_R+1	XM_016659073.1	XM_016659073.1	DRM2	DNA (cytosine-5-)-methyltransferase	1443-1465	2.5	GO:0003677(DNA binding);GO:0003886(DNA );GO:0005515(protein binding);GO:0005634(nucleus);GO:0005654(nucleoplasm);GO:0006306(DNA methylation);GO:0008170(N-methyltransferase activity);GO:0016458(gene silencing);GO:0050832(defense response to fungus);GO:0051567(histone H3-K9 methylation)	ko00270(Cysteine and methionine metabolism)
sly-miR396b_R+1	XM_016659077.1	XM_016659077.1	DRM2	DNA (cytosine-5-)-methyltransferase	1443-1465	2.5	GO:0003677(DNA binding);GO:0003886(DNA );GO:0005515(protein binding);GO:0005634(nucleus);GO:0005654(nucleoplasm);GO:0006306(DNA methylation);GO:0008170(N-methyltransferase activity);GO:0016458(gene silencing);GO:0050832(defense response to fungus);GO:0051567(histone H3-K9 methylation)	ko00270(Cysteine and methionine metabolism)
sly-miR396b_R+1	XM_016659076.1	XM_016659076.1	DRM2	DNA (cytosine-5-)-methyltransferase	1443-1465	2.5	GO:0003677(DNA binding);GO:0003886(DNA );GO:0005515(protein binding);GO:0005634(nucleus);GO:0005654(nucleoplasm);GO:0006306(DNA methylation);GO:0008170(N-methyltransferase activity);GO:0016458(gene silencing);GO:0050832(defense response to fungus);GO:0051567(histone H3-K9 methylation)	ko00270(Cysteine and methionine metabolism)
sly-miR396b_R+1	XM_016659075.1	XM_016659075.1	DRM2	DNA (cytosine-5-)-methyltransferase	1443-1465	2.5	GO:0003677(DNA binding);GO:0003886(DNA );GO:0005515(protein binding);GO:0005634(nucleus);GO:0005654(nucleoplasm);GO:0006306(DNA methylation);GO:0008170(N-methyltransferase activity);GO:0016458(gene silencing);GO:0050832(defense response to fungus);GO:0051567(histone H3-K9 methylation)	ko00270(Cysteine and methionine metabolism)
sly-miR396b_R+1	XM_016620945.1	XM_016620945.1	-	uncharacterized LOC103401222	333-354	2	GO:0005886(plasma membrane);GO:0016021(integral component of membrane);GO:0042626(ATPase activity, coupled to transmembrane movement of substances)	ko01200(Carbon metabolism);ko01230(Biosynthesis of amino acids);ko00920(Sulfur metabolism);ko00270(Cysteine and methionine metabolism)
sly-miR396b_R+1	XM_016590407.1	XM_016590407.1	-	-	912-933	2.2	-
sly-miR396b_R+1	XM_016621525.1	XM_016621525.1	-	enoyl-[acyl-carrier-protein] reductase [NADH] 2	756-776	2.5	GO:0004318(enoyl-[acyl-carrier-protein] reductase );GO:0005507(copper ion binding);GO:0005835(fatty acid synthase complex);GO:0006633(fatty acid biosynthetic process);GO:0009507(chloroplast);GO:0009570(chloroplast stroma);GO:0009579(thylakoid);GO:0009941(chloroplast envelope);GO:0016491(oxidoreductase activity);GO:0016631(enoyl-[acyl-carrier-protein] reductase activity);GO:0055114(oxidation-reduc…	ko01212(Fatty acid metabolism);ko00061(Fatty acid biosynthesis);ko00780(Biotin metabolism)
sly-miR396b_R+1	XM_016621526.1	XM_016621526.1	-	enoyl-[acyl-carrier-protein] reductase [NADH] 2	792-812	2.5	GO:0004318(enoyl-[acyl-carrier-protein] reductase );GO:0005507(copper ion binding);GO:0005835(fatty acid synthase complex);GO:0006633(fatty acid biosynthetic process);GO:0009507(chloroplast);GO:0009570(chloroplast stroma);GO:0009579(thylakoid);GO:0009941(chloroplast envelope);GO:0016491(oxidoreductase activity);GO:0016631(enoyl-[acyl-carrier-protein] reductase activity);GO:0055114(oxidation-reduc…	ko01212(Fatty acid metabolism);ko00061(Fatty acid biosynthesis);ko00780(Biotin metabolism)
sly-miR396b_R+1	XM_016621731.1	XM_016621731.1	AGL28	D-3-phosphoglycerate dehydrogenase	87-108	2.5	GO:0003677(DNA binding);GO:0003700(transcription factor activity, sequence-specific DNA binding);GO:0005634(nucleus);GO:0006351(transcription, DNA-templated);GO:0006355(regulation of transcription, DNA-templated);GO:0009911(positive regulation of flower development);GO:0046983(protein dimerization activity)	ko01200(Carbon metabolism);ko01230(Biosynthesis of amino acids);ko00260(Glycine, serine and threonine metabolism)
sly-miR396b_R+1	XM_016622490.1	XM_016622490.1	OEP64	casein kinase II beta chain 2	310-331	2.5	GO:0009507(chloroplast);GO:0009536(plastid);GO:0009941(chloroplast envelope);GO:0015031(protein transport);GO:0016884(carbon-nitrogen ligase activity, with glutamine as amido-N-donor);GO:0031359(integral component of chloroplast outer membrane)	ko03008(Ribosome biogenesis in eukaryotes);ko04712(Circadian rhythm - plant)
