# Supplementary material for: Small RNA and Degradome Sequencing Reveal Important MicroRNA Function in Nicotiana tabacum Response to Bemisia tabaci
Source: MDPI journal article supplement (doi:10.3390/genes13020361), 2022-02-17
Supplement: s1 [file Supplementary Table S5_20220216.xlsx]

## Sheet: Table S5
Table S5. Summary table of significant differentially expressed miRNAs and their target genes annotation. Fold change was obtained by dividing the mean of the expression of Infected group by the mean of Control. Statistical significance was evaluated using Student's t test, the P value colored with red was evaluated at P<0.01, and the blue was at P<0.05.
miRNA name	miRNA sequence	Lenth	Up/down	Fold change	P value	Expression level	Number of target genes	Gene annotation
PC-5p-244240_18	AAACCCGCTCCCGTCACTTTAGTT	24	up	inf	0.000102	low	2	E3 ubiquitin-protein ligase UPL4; transcription factor HBP-1b(c1)-like.
fve-MIR3627b-p5_2ss7AT22AT	TGTCGCTGGAGAGATGGCACTT	22	up	2.81246	0.00359	middle	0
PC-5p-50806_114	TTTTCGATATCGCTGGCCTCC	21	down	0.482544	0.00617	middle	4	eukaryotic peptide chain release factor GTP-binding subunit ERF3A.
PC-5p-181486_27	ACCCATTGTGGAGTTGTTGGGCTA	24	down	-inf	0.00726	low	0
PC-3p-258573_16	AATGTCGTGTCCTAAAGTTTGAGC	24	down	-inf	0.00817	low	0
gma-MIR171g-p3	TTGAGCCGTGCCAATATCATA	21	up	1.59279	0.00897	middle	15	hypothetical protein; DELLA protein GAI1-like; DELLA protein RGL2.
PC-3p-61258_95	TTTACTTCCCACCGCTTAGCA	21	up	1.666	0.0109	middle	0
PC-5p-135574_40	TCGCCTGATAATGCTCTTAAA	21	down	-inf	0.0156	middle	1
hbr-MIR6173-p5_2ss17AG18GC	TACCCCAGTAGTCCTAGC	18	down	0.425289	0.0171	middle	45	acetyl-CoA carboxylase 1-like; DNA damage-binding protein 1; U-box domain-containing protein 72-like; systemin receptor SR160; protein BRASSINOSTEROID INSENSITIVE 1-like; serine/threonine-protein kinase ATG1-like; D-3-phosphoglycerate dehydrogenase 1; survival of motor neuron-related-splicing factor 30; geranylgeranyl diphosphate reductase; DNA-directed RNA polymerase II 8.2 kDa; ATP-binding cass…
PC-3p-130469_42	AGCACCTGTGTATGAACTTCTAGT	24	up	6.15138	0.0176	middle	5	3-hydroxy-3-methylglutaryl-coenzyme A reductase 2.
nta-MIR6151g-p3	AATCCGAGCCCCACATTCATC	21	up	1.27378	0.0193	middle	5	BRASSINOSTEROID INSENSITIVE 1-associated receptor kinase 1-like.
nta-MIR6151h-p3	AATCCGAGCCCCACATTCATC	21	up	1.27378	0.0193	middle	5	BRASSINOSTEROID INSENSITIVE 1-associated receptor kinase 1-like.
nta-MIR6151e-p3	AATCCGAGCCCCACATTCATC	21	up	1.27378	0.0193	middle	5	BRASSINOSTEROID INSENSITIVE 1-associated receptor kinase 1-like.
nta-MIR6151f-p3	AATCCGAGCCCCACATTCATC	21	up	1.27378	0.0193	middle	5	BRASSINOSTEROID INSENSITIVE 1-associated receptor kinase 1-like.
nta-MIR6151i-p3	AATCCGAGCCCCACATTCATC	21	up	1.27378	0.0193	middle	5	BRASSINOSTEROID INSENSITIVE 1-associated receptor kinase 1-like.
nta-MIR6151d-p3	AATCCGAGCCCCACATTCATC	21	up	1.27378	0.0193	middle	5	BRASSINOSTEROID INSENSITIVE 1-associated receptor kinase 1-like.
PC-3p-171618_30	TCTTCCATGATACACATATTA	21	down	0.42297	0.0195	middle	49	DNA replication ATP-dependent helicase/nuclease DNA2; extensin-like; beta-galactosidase; nuclear pore complex protein NUP133; UBP1-associated protein 2A-like.
nta-miR6159	TAGCATAGAATTCTCGCACCTA	22	up	1.36871	0.0203	high	1
PC-3p-202629_23	TTTTCTTGAGGCTGTTAGGGATGT	24	up	inf	0.0206	low	3	26S proteasome subunit RPN7.
PC-5p-194313_25	AAAAGATTTTGAACCTCCTTGACC	24	up	4.21304	0.0211	middle	7	auxin-induced protein 15A-like.
stu-miR8021_1ss9CA	ATTCAAGGATCAAACTCGAGACCT	24	down	0.573621	0.0211	low	0
nta-miR6025b	TGCCAACTATTGAGATGACATC	22	up	1.42108	0.0211	high	27	putative late blight resistance protein homolog R1-A-like and R1B-17; DNA repair helicase UVH6; peroxisoma nicotinam deadenine dinucleotide carrier-like; NB-ARC domain-containing disease resistance protein.
nta-MIR6161c-p3_1ss7AG	GCACCTGTGTATGAACTTCCAGCA	24	up	1.53771	0.022	middle	4
bra-miR168a-5p_L+1	CTCGCTTGGTGCAGGTCGGGAA	22	up	3.78982	0.0232	low	0
mtr-MIR2603-p5_2ss9AC17AC	GTCCCTGCCCTTTGTACA	18	down	0.419541	0.024	middle	86	putative cyclic nucleotide-gated ion channel 15; BRASSINOSTEROID INSENSITIVE 1-associated receptor kinase 1-like; Calmodulin; hypothetical protein; auxin-responsive protein IAA32; guanylate kinase 2; ATP-binding cassette sub-family G member 2; DNA (cytosine-5-)-methyltransferase; SART-1 family protein DOT2; putative late blight resistance protein homolog R1B-14; glycine-rich RNA-binding protein 3.
mtr-MIR2603-p3_2ss9AC17AC	GTCCCTGCCCTTTGTACA	18	down	0.419541	0.024	middle	86
hbr-MIR6173-p3_2ss18GA19CG	CGTAAACGATGGATACTAG	19	down	-inf	0.0241	low	19	enolase 1; UDP-glycosyltransferase 73C5; dolichol-phosphate mannosyltransferase subunit 3-like; protein transport protein Sec61 subunit alpha-like; phosphoenolpyruvate carboxylase-like; F-box/WD repeat-containing protein pof1-like; heterogeneous nuclear ribonucleoprotein 1-like.
ath-miR8175_L+4	GTTCGATCCCCGGCAACGGCGCCA	24	up	1.91682	0.0311	middle	5	pentatricopeptide repeat-containing protein At2g04860.
PC-3p-113881_50	AATTAATGTCAGTTGGGTGAGGCA	24	down	0.300599	0.0323	middle	1	dna J protein homolog.
PC-5p-67924_86	AGGGCTGCTATTTAGAGATTAGTC	24	up	1.43109	0.0334	low	4	methionine gammalyase; Pentatricopeptide repeat superfamily protein isoform 1.
osa-MIR5825-p5_2ss15TC20AC	TTATTATTGTTTTCCACAACC	21	down	0.672016	0.0353	low	25	nuclear pore complex protein NUP98A-like; 1-aminocyclopropane-1-carboxylate oxidase 5; probable cinnaly alcohol dehydrogenase 1; NAD(P)-linked oxidoreductase superfamily protein; dnaJ protein ERDJ2A; sphinganine C(4)-monooxygenase 1-like; NB-ARC domain disease resistance protein; hypothetical protein.
PC-3p-127236_43	ATGCCTCATACAACTAGTGTAAGT	24	up	6.03038	0.0361	middle	3
csi-miR160c-5p_R+1	TGCCTGGCTCCCTGTATGCTTT	22	up	1.74507	0.0375	middle	33	ADP-ribosylation factor 1; auxin response factor 7-like; hypothetical protein; 14.7 kDa ribonuclease H-like protein; phosphoribosylglycinamide formyltransferase.
PC-5p-10208_389	TGTATTCTTTCCGCTCAATTC	21	down	0.825672	0.038	middle	3	pyruvate dehydrogenase E1 component subunit alpha;serine/threonine-protein kinase CTR1-like.
gma-MIR4995-p3	CATAGGCAGTGGCTTGGTT	19	down	0.486639	0.0383	middle	48	probable ribose-5-phosphate isomerase 2; methylecgonone reductase-like; hypothetical protein; pentatricopeptide repeat-containing protein At2g04860; BRASSINOSTEROIDINSENSITIVE 1-associated receptor kinase 1-like; endoglucanase 23-like; HSPA4 nucleotide -binding domain protein; dnaJ protein homolog; flowering time control protein FY.
gma-MIR9724-p5	ACAATCCTCACCTCAAAAGCTAGC	24	up	4.92741	0.0386	low	5	serine-threonine kinase receptor-associated protein-like; probable cyclic nucleotide-gated ion channel 20.
PC-3p-258597_16	GTATCCTGCATCTTCTCTTTC	21	up	inf	0.0404	low	43	alpha carbonic anhydrase 4-like; mannan endo-1; hypothetical protein; histone-lysine N-methyltransferase; 30-kDa cleavage and polyadenylation specificity factor 30-like.
PC-3p-114443_49	ATTTCTGGAGAATCCGACACGAGT	24	up	3.36915	0.0421	middle	5
PC-3p-146848_36	AGCGTATTATGTTAGAACTCCAGC	24	up	4.88991	0.0428	middle	0
stu-miR166b_1ss4GA	TCGAACCAGGCTTCATTCCTC	21	up	1.51628	0.045	middle	1	aldo-keto reductase family 4 member C9-like.
stu-miR391-5p_L-1R+2	ACGCAGGAGAGATGATGCTGGA	22	down	0.671565	0.0456	middle	0
PC-5p-216933_21	TAGTTTCGCCCCTAGAGCATA	21	up	inf	0.0464	low	3
csi-miR160c-5p_R+1_1ss19CT	TGCCTGGCTCCCTGTATGTTTT	22	up	2.17375	0.0466	middle	31	ADP-ribosylation factor 1; auxin response factor 7-like; hypothetical protein.
ath-miR396b-5p_R+1	TTCCACAGCTTTCTTGAACTTT	22	down	0.863808	0.0477	middle	40	31 kDa ribonucleoprotein; cysteine protease; protein arginine N-methyltransferase 1.5; zeatin O-glucosyltransferase-like; DNA(cytosine-5-)-methyltransferase; mitogen-activated protein kinase kinase kinase 1-like; emp24/gp25L/p24 family of membrane trafficking proteins (ISS).
sly-miR396b_R+1	TTCCACAGCTTTCTTGAACTTT	22	down	0.863808	0.0477	middle	40	DNA-directed RNA polymerase V subunit 5A; hypothetical protein; mitogen-activated protein kinase kinase kinase 1-like; zeatin O-glucosyltransferase-like; protein arginine N-methyltransferase 1.5; cysteine protease; 31 kDa ribonucleoprotein.
PC-5p-298501_13	TGGCCCGTCAACATCATGTTC	21	up	4.61214	0.049	middle	2
nta-MIR6155-p3_2ss10CT21CT	ATTCGAGAGTAAGGCTACCTTATG	24	up	1.40229	0.0495	middle	0
