# Supplementary material for: Small RNA and Degradome Sequencing Reveal Important MicroRNA Function in Nicotiana tabacum Response to Bemisia tabaci
Source: MDPI journal article supplement (doi:10.3390/genes13020361), 2022-02-17
Supplement: s1 [file Supplementary Table S6_20220216.xlsx]

## Sheet: Table S6
Table S6. miRNAs classification from unique reads of degradome sequencing. Mappable reads means the number of mRNA clipping site tags that could be compared with the sequencing results.
Sample	Number	Ratio
Raw Reads	44213505	/
Unique Raw Reads	8855513	/
reads < 15nt after removing 3 adaptor	96375	0.22%
Mappable Reads	44117130	99.78%
Unique reads < 15nt after removing 3 adaptor	21564	0.24%
Unique Mappable Reads	8833949	99.76%
Mapped Reads	37972958	85.89%
Unique Mapped Reads	6008581	67.85%
Number of input Transcript	108194	/
Number of Coverd Transcript	86282	79.75%
