# Supplementary material for: Small RNA and Degradome Sequencing Reveal Important MicroRNA Function in Nicotiana tabacum Response to Bemisia tabaci
Source: MDPI journal article supplement (doi:10.3390/genes13020361), 2022-02-17
Supplement: s1 [file Supplementary Table S7_20220216.xlsx]

## Sheet: Table S7
Table S7. Degradome category distribution in degradome sequencing. The target genes are divided into five levels, category 0-4, which decrease layer by layer according to the abundance of degradation sites and transcripts. The significance of category classification lies in that the number of degraded fragments generated by miRNA cutting mRNA can be intuitively known, and their reliability is cat…
Degradome category	Number of the genes
0	183
1	32
2	23
3	5
4	10
