# Supplementary material for: Small RNA and Degradome Sequencing Reveal Important MicroRNA Function in Nicotiana tabacum Response to Bemisia tabaci
Source: MDPI journal article supplement (doi:10.3390/genes13020361), 2022-02-17
Supplement: s1 [file Supplementary Table S8_20220216.xlsx]

## Sheet: Table S8
Table S8. Gene Ontology (GO) analysis of target genes in degradome sequencing. Statistical significance was evaluated using Fisher's exact test, the P value colored with red was evaluated at P<0.01, the blue was at P<0.05.
GO_ID	GO_Term	GO_function	GO_class	Genes	Gene number	P value
GO:0048366	leaf development	biological_process	7	MSTRG.12636;MSTRG.21993;107760271;107825286;MSTRG.14754;107821683;107795016;107799231;107812877;107802800;MSTRG.18776;MSTRG.12840;107769640;107760064;107777006;MSTRG.26163;107828000;107814687;107794188;107772772;MSTRG.7846;107809759;MSTRG.10899;107772002;107782296;MSTRG.24755;MSTRG.20398;MSTRG.15043;MSTRG.10163;MSTRG.24532;MSTRG.17943;MSTRG.13819;107774428;107823287;107763641;107816694	36	0
GO:0009855	determination of bilateral symmetry	biological_process	6	MSTRG.24677;MSTRG.5736;MSTRG.4815;107782674;MSTRG.20326;107829997;MSTRG.5270;107760551;107768119;107817328	10	4.0605e-16
GO:0030154	cell differentiation	biological_process	5	MSTRG.20398;107777006;MSTRG.2137;107817328;MSTRG.20326;107807450;MSTRG.7522;MSTRG.24532;107804251;MSTRG.21143;MSTRG.20652;MSTRG.4757;MSTRG.18776;MSTRG.9198;107783385;107759353;107810888;107785538;107768119;107763536;107784366;107763537;MSTRG.23959;MSTRG.24677;MSTRG.15043;107760551;107829997;MSTRG.24455;MSTRG.3125;107782674;MSTRG.18147;MSTRG.17943;107803429;MSTRG.7846;MSTRG.25639;107762327;MSTRG.2…	46	5.55112e-16
GO:0006355	regulation of transcription, DNA-templated	biological_process	8	MSTRG.25267;107789814;107812352;MSTRG.457;107760551;107768750;107770932;MSTRG.18776;107804149;MSTRG.3125;107828000;MSTRG.8935;107782296;MSTRG.23562;107810888;MSTRG.12091;MSTRG.11483;107829997;107817328;107769867;107805141;107762327;107783385;MSTRG.21993;MSTRG.15043;MSTRG.4815;107790595;MSTRG.25556;MSTRG.4757;MSTRG.19971;MSTRG.19622;107781982;107825286;MSTRG.18147;107774428;107759353;MSTRG.8049;10…	183	8.88178e-16
GO:0006351	transcription, DNA-templated	biological_process	8	107825286;107828000;MSTRG.25293;MSTRG.807;MSTRG.15919;107760551;107817328;MSTRG.9469;MSTRG.9878;MSTRG.20109;MSTRG.52;107789550;107760064;MSTRG.2682;MSTRG.20398;107803338;MSTRG.1024;107767633;MSTRG.20220;107821683;MSTRG.10899;107787619;MSTRG.3125;MSTRG.14055;MSTRG.4159;107770932;107786226;MSTRG.21143;107820735;107789352;MSTRG.5526;107763641;MSTRG.5270;107814687;MSTRG.457;107765789;107770058;MSTRG.…	154	8.88178e-16
GO:0010073	meristem maintenance	biological_process	4	107759353;MSTRG.4757;107804251;107810888;MSTRG.24677;107760551;107782674;MSTRG.3125;107817328;MSTRG.21143;107783385;107803429;107803338;107784366;107829997;107768119	16	4.44089e-14
GO:0010014	meristem initiation	biological_process	4	MSTRG.5270;107768119;MSTRG.24677;MSTRG.4815;107817328;107760551;107829997;MSTRG.5736;MSTRG.20326;107782674	10	1.07254e-13
GO:0003700	DNA-binding transcription factor activity	molecular_function	4	MSTRG.23562;107810717;107784366;107766885;107809759;MSTRG.25029;107790595;MSTRG.18251;MSTRG.12091;MSTRG.26154;107812352;107759353;MSTRG.13053;107822302;MSTRG.1090;MSTRG.26046;107777006;MSTRG.20398;MSTRG.8795;MSTRG.1251;MSTRG.23738;MSTRG.9972;107772993;MSTRG.11281;107786226;MSTRG.26118;MSTRG.1024;MSTRG.25267;MSTRG.5736;107786257;MSTRG.11367;107770063;MSTRG.24176;107828000;107816234;107765662;MSTRG…	147	1.93945e-12
GO:0009734	auxin-activated signaling pathway	biological_process	6	MSTRG.25420;MSTRG.23142;107787619;107782796;MSTRG.21598;107814545;107794188;107822302;107760064;107767633;107765789;MSTRG.14136;MSTRG.18779;MSTRG.974;107814687;MSTRG.8049;107816234;MSTRG.1024;107772993;107781721;MSTRG.9972;MSTRG.13053;MSTRG.18251;MSTRG.9878;MSTRG.22502;107797209;107766885;MSTRG.26046;107828000;107784013	30	6.09768e-12
GO:0035198	miRNA binding	molecular_function	8	107772993;107760064;107781721;107797209;107814687;107767633;107816234;107794188;107828000	9	9.0764e-12
GO:0048316	seed development	biological_process	5	MSTRG.3683;MSTRG.19622;107810888;MSTRG.3125;107821372;MSTRG.8935;MSTRG.8795;MSTRG.21143;MSTRG.4012;107803429;MSTRG.15422;107804251;MSTRG.25919;107803338;107759353;107784366;MSTRG.17556;107818199;107783385;MSTRG.4757	20	1.60508e-11
GO:0003677	DNA binding	molecular_function	6	MSTRG.9972;107782674;MSTRG.4159;107803429;MSTRG.457;107823216;MSTRG.8587;107809759;MSTRG.20398;107803280;MSTRG.20208;MSTRG.4012;MSTRG.1024;107804251;107814567;107790595;MSTRG.19622;MSTRG.21893;MSTRG.20064;MSTRG.14405;MSTRG.15841;107817328;MSTRG.25738;MSTRG.7313;107812352;107785538;MSTRG.24176;107767374;107784013;107829352;107786226;107822648;107797209;MSTRG.1513;MSTRG.1090;107829997;107774760;MST…	154	3.75893e-11
GO:0009534	chloroplast thylakoid	cellular_component	7	MSTRG.5678;MSTRG.600;MSTRG.22828;MSTRG.12630;MSTRG.10303;MSTRG.4622;MSTRG.15317;MSTRG.17965;MSTRG.1422;MSTRG.15477;MSTRG.22481;MSTRG.4358;MSTRG.20832;MSTRG.13748;MSTRG.18633;MSTRG.6586;MSTRG.15728;107786895;MSTRG.5981;MSTRG.18533;MSTRG.8315;MSTRG.25632;MSTRG.14490;MSTRG.15182;MSTRG.16662;MSTRG.11426;MSTRG.4904;MSTRG.23679;MSTRG.23128;MSTRG.3694;MSTRG.11222;MSTRG.1488;MSTRG.3824	33	1.76739e-10
GO:0048263	determination of dorsal identity	biological_process	7	107829997;107782674;107768119;107817328;MSTRG.24677;107760551	6	5.87643e-10
GO:0048481	plant ovule development	biological_process	5	MSTRG.2137;MSTRG.25639;107783385;107784366;107803338;MSTRG.21143;107810888;MSTRG.4757;MSTRG.18779;MSTRG.3125;107759353;MSTRG.18147;107803429;107804251	14	6.6563e-10
GO:0007389	pattern specification process	biological_process	4	107814687;107781721;107767633;107772993;107797209;107816234;107828000;107794188;107760064	9	1.77469e-09
GO:0010093	specification of floral organ identity	biological_process	5	107783385;107803429;MSTRG.21143;MSTRG.3125;MSTRG.4757;107759353;107810888;107803338;107804251;107784366	10	2.18447e-09
GO:0009570	chloroplast stroma	cellular_component	8	MSTRG.24827;MSTRG.8315;MSTRG.18044;MSTRG.16789;MSTRG.12931;MSTRG.22076;MSTRG.875;MSTRG.3892;MSTRG.24317;MSTRG.23627;MSTRG.8120;MSTRG.21165;MSTRG.14084;MSTRG.6778;MSTRG.11058;MSTRG.17965;MSTRG.3694;MSTRG.22828;MSTRG.2517;MSTRG.18589;MSTRG.5818;MSTRG.464;MSTRG.1807;MSTRG.870;MSTRG.5308;MSTRG.4904;MSTRG.14373;MSTRG.12327;MSTRG.534;MSTRG.17126;MSTRG.16538;MSTRG.23704;MSTRG.5018;MSTRG.24405;MSTRG.7307…	65	2.2528e-09
GO:0080060	integument development	biological_process	5	107768119;107829997;MSTRG.5270;MSTRG.24677;107817328;107760551;MSTRG.4815;107782674	8	2.62564e-09
GO:0045962	positive regulation of development, heterochronic	biological_process	7	107777006;MSTRG.13819;MSTRG.24532;MSTRG.21993;MSTRG.7846;MSTRG.15043;MSTRG.17943;MSTRG.18776;MSTRG.20398	9	7.98236e-09
GO:0009579	thylakoid	cellular_component	5	MSTRG.22076;MSTRG.10303;MSTRG.14490;MSTRG.12630;MSTRG.5308;MSTRG.3694;MSTRG.5981;MSTRG.21295;MSTRG.11426;MSTRG.11609;MSTRG.1422;MSTRG.12181;MSTRG.25632;MSTRG.813;MSTRG.4622;MSTRG.464;MSTRG.15728;MSTRG.4904;MSTRG.24317;MSTRG.23679;MSTRG.11222;MSTRG.24827;MSTRG.15317;MSTRG.14373;MSTRG.4358;MSTRG.17965;MSTRG.875;MSTRG.15344;MSTRG.3892;MSTRG.8315;MSTRG.15182	31	8.18496e-09
GO:0009941	chloroplast envelope	cellular_component	7	MSTRG.4965;MSTRG.19499;MSTRG.25654;MSTRG.8530;MSTRG.20933;MSTRG.13261;MSTRG.5385;MSTRG.1124;MSTRG.10420;MSTRG.14373;MSTRG.6590;MSTRG.21295;MSTRG.12327;107769640;MSTRG.18533;107821372;MSTRG.23861;MSTRG.25292;MSTRG.8315;MSTRG.20832;MSTRG.9318;MSTRG.14182;MSTRG.3824;MSTRG.15344;MSTRG.5748;MSTRG.18176;MSTRG.12630;MSTRG.4358;MSTRG.21382;MSTRG.19227;MSTRG.3220;MSTRG.11222;107823287;MSTRG.464;MSTRG.1408…	60	1.28818e-08
GO:0005524	ATP binding	molecular_function	5	MSTRG.6061;107774428;MSTRG.15823;107765023;107802800;MSTRG.2720;MSTRG.22526;107813711;107804274;MSTRG.17583;MSTRG.12460;MSTRG.3028;MSTRG.21295;107821683;107794982;MSTRG.4823;MSTRG.13621;MSTRG.3400;MSTRG.24819;107808654;MSTRG.25490;MSTRG.21382;MSTRG.12636;MSTRG.3716;107801393;107831631;107760271;MSTRG.8304;107814998;MSTRG.12716;MSTRG.4521;107772002;MSTRG.25475;107796273;107812541;107813818;1077825…	138	2.12947e-08
GO:0016602	CCAAT-binding factor complex	cellular_component	7	107766835;MSTRG.24915;MSTRG.19622;MSTRG.25029;107815042;MSTRG.8795;MSTRG.20705;MSTRG.15841;107786257	9	4.12337e-08
GO:0061062	regulation of nematode larval development	biological_process	8	MSTRG.26163;MSTRG.24755;107760271;107763641;MSTRG.10899;MSTRG.12636	6	4.57899e-08
GO:0005515	protein binding	molecular_function	4	MSTRG.4248;MSTRG.19371;MSTRG.5086;MSTRG.15760;MSTRG.1513;107790059;MSTRG.24532;MSTRG.21993;MSTRG.18779;MSTRG.17693;MSTRG.19192;MSTRG.12625;MSTRG.26187;MSTRG.9672;MSTRG.20064;MSTRG.7313;MSTRG.25802;MSTRG.8162;MSTRG.17965;MSTRG.9905;MSTRG.5218;MSTRG.15182;MSTRG.9078;107763641;MSTRG.21598;MSTRG.9024;MSTRG.23400;MSTRG.24284;MSTRG.10195;107800887;MSTRG.15443;107798790;MSTRG.25293;107772123;107831631;M…	161	3.17593e-07
GO:0048829	root cap development	biological_process	5	107760064;107797209;107794188;107767633;107814687;107772993;107781721;107828000;107816234	9	5.04083e-07
GO:0019953	sexual reproduction	biological_process	4	MSTRG.21143;MSTRG.3125;MSTRG.4757;107759353;107803429;107784366;107810888;107803338;107783385;107804251	10	5.13964e-07
GO:0005829	cytosol	cellular_component	6	107830166;MSTRG.4409;MSTRG.8086;MSTRG.24205;MSTRG.13080;MSTRG.11058;MSTRG.2764;107798953;107795765;MSTRG.18589;MSTRG.2070;MSTRG.14494;MSTRG.5688;MSTRG.23136;MSTRG.10486;MSTRG.8350;MSTRG.10206;MSTRG.23031;MSTRG.24284;MSTRG.25568;107804149;MSTRG.3795;107785347;MSTRG.13032;MSTRG.24314;MSTRG.22083;MSTRG.10195;MSTRG.14864;MSTRG.969;MSTRG.15342;MSTRG.6645;MSTRG.18528;MSTRG.17277;MSTRG.602;107768490;MST…	158	6.60581e-07
GO:0015979	photosynthesis	biological_process	5	MSTRG.15728;MSTRG.15823;MSTRG.15317;MSTRG.23679;MSTRG.14331;MSTRG.20832;MSTRG.1422;MSTRG.10303;MSTRG.11252;MSTRG.4622;MSTRG.8315;MSTRG.15182;MSTRG.12630;MSTRG.11222;MSTRG.4358;MSTRG.6586;MSTRG.2457;MSTRG.3694	18	1.15292e-06
GO:0009535	chloroplast thylakoid membrane	cellular_component	8	MSTRG.19971;MSTRG.11426;MSTRG.18584;MSTRG.4882;MSTRG.1989;MSTRG.15477;MSTRG.5385;MSTRG.10303;MSTRG.17537;MSTRG.15317;MSTRG.11222;MSTRG.13748;MSTRG.3506;MSTRG.813;MSTRG.5678;MSTRG.8530;MSTRG.14490;MSTRG.1422;MSTRG.10360;MSTRG.6586;MSTRG.4965;MSTRG.16157;MSTRG.23679;MSTRG.4622;MSTRG.14182;MSTRG.22481;MSTRG.25654;MSTRG.25632;MSTRG.4461;MSTRG.600;MSTRG.15182;MSTRG.17965;MSTRG.1177;MSTRG.4358;MSTRG.12…	43	1.4059e-06
GO:0009965	leaf morphogenesis	biological_process	6	MSTRG.20398;MSTRG.21993;107782674;107768119;MSTRG.15043;107777006;107817328;MSTRG.24532;MSTRG.24677;MSTRG.18776;107760551;MSTRG.7846;107829997;MSTRG.13819;MSTRG.17943	15	2.18558e-06
GO:0031540	regulation of anthocyanin biosynthetic process	biological_process	8	107794188;107760064;107828000;107814687	4	3.43719e-06
GO:0051131	chaperone-mediated protein complex assembly	biological_process	8	MSTRG.19142;MSTRG.12625;MSTRG.12460;MSTRG.1082;MSTRG.18528;MSTRG.2764	6	5.52492e-06
GO:0005730	nucleolus	cellular_component	6	MSTRG.398;MSTRG.18843;MSTRG.24017;107832006;MSTRG.1082;MSTRG.8350;MSTRG.9810;MSTRG.2764;107830449;MSTRG.25292;MSTRG.7556;MSTRG.3890;MSTRG.19142;MSTRG.11364;MSTRG.13796;MSTRG.672;MSTRG.3683;MSTRG.11609;MSTRG.5077;MSTRG.12625;MSTRG.10163;MSTRG.16980;MSTRG.10195;MSTRG.7094;MSTRG.19843;MSTRG.8935;MSTRG.6037;MSTRG.23942;MSTRG.20652;MSTRG.1684;MSTRG.12179;MSTRG.2682;MSTRG.18457;MSTRG.14754;107800695;MS…	37	6.01573e-06
GO:0009908	flower development	biological_process	6	MSTRG.11367;MSTRG.8596;MSTRG.9972;MSTRG.14455;MSTRG.18251;MSTRG.26046;107803338;MSTRG.21143;MSTRG.24748;107783385;MSTRG.4757;107803429;107814545;MSTRG.14136;107759353;MSTRG.19680;107810888;MSTRG.9878;MSTRG.20652;MSTRG.3125;MSTRG.8049;MSTRG.23959;MSTRG.11483;107804251;107784366;107765707	26	6.56678e-06
GO:0071277	cellular response to calcium ion	biological_process	8	MSTRG.19142;MSTRG.18528;MSTRG.12625;MSTRG.2764;MSTRG.1082	5	8.1223e-06
GO:0010205	photoinhibition	biological_process	9	MSTRG.25632;MSTRG.4904;MSTRG.23861;MSTRG.5385;MSTRG.17965;MSTRG.11426;MSTRG.8530	7	9.05196e-06
GO:0048589	developmental growth	biological_process	4	107794188;107760064;107814687;107828000	4	1.00733e-05
GO:0010242	oxygen evolving activity	molecular_function	5	MSTRG.11426;MSTRG.4904;MSTRG.17965;MSTRG.25632	4	1.00733e-05
GO:0009538	photosystem I reaction center	cellular_component	6	MSTRG.1422;MSTRG.12630;MSTRG.11222;MSTRG.4358;MSTRG.10303;MSTRG.15728	6	1.15239e-05
GO:0051082	unfolded protein binding	molecular_function	5	MSTRG.19142;MSTRG.602;MSTRG.1082;MSTRG.13135;MSTRG.4965;MSTRG.18528;MSTRG.21295;MSTRG.10390;MSTRG.21382;MSTRG.3892;MSTRG.6645;MSTRG.2764;MSTRG.12625;MSTRG.17583;MSTRG.14494	15	1.47516e-05
GO:0045037	protein import into chloroplast stroma	biological_process	11	MSTRG.18176;MSTRG.17583;MSTRG.21382;MSTRG.4461;MSTRG.8746;MSTRG.1124;MSTRG.3220	7	1.51232e-05
GO:0009408	response to heat	biological_process	5	MSTRG.18528;MSTRG.11058;MSTRG.9210;MSTRG.21295;MSTRG.252;MSTRG.17583;MSTRG.3892;MSTRG.20604;MSTRG.974;MSTRG.4012;MSTRG.14494;MSTRG.2764;MSTRG.11281;MSTRG.25802;MSTRG.22502;107769992;MSTRG.19142;MSTRG.12625;MSTRG.21382;MSTRG.12460;MSTRG.19170;MSTRG.4965;MSTRG.1082;MSTRG.10270	24	1.60781e-05
GO:0042802	identical protein binding	molecular_function	5	MSTRG.4622;MSTRG.11872;MSTRG.22410;MSTRG.21223;107822302;MSTRG.1177;MSTRG.15182;MSTRG.510;MSTRG.12840;MSTRG.18375;MSTRG.15443;MSTRG.19971;MSTRG.23400;MSTRG.25420;107788901;MSTRG.16662;MSTRG.1488;107787619;MSTRG.17279;MSTRG.15359	20	1.75752e-05
GO:1990481	mRNA pseudouridine synthesis	biological_process	11	107814582;MSTRG.11149;MSTRG.888	3	2.43243e-05
GO:0000495	box H/ACA snoRNA 3'-end processing	biological_process	13	MSTRG.888;MSTRG.11149;107814582	3	2.43243e-05
GO:0030095	chloroplast photosystem II	cellular_component	8	MSTRG.8315;MSTRG.13748;MSTRG.17965;MSTRG.4904;MSTRG.25632;MSTRG.11426;MSTRG.3694	7	3.02283e-05
GO:0035304	regulation of protein dephosphorylation	biological_process	9	MSTRG.25632;MSTRG.4904;MSTRG.17965;MSTRG.11426	4	4.48648e-05
GO:0005782	peroxisomal matrix	cellular_component	8	MSTRG.14415;MSTRG.12716;MSTRG.15754;MSTRG.22526	4	4.48648e-05
GO:0009507	chloroplast	cellular_component	7	MSTRG.8870;MSTRG.3562;MSTRG.8596;MSTRG.19045;MSTRG.14112;MSTRG.5981;MSTRG.11252;MSTRG.5308;MSTRG.7307;MSTRG.4521;MSTRG.368;107803441;MSTRG.4461;MSTRG.17799;MSTRG.4965;107830449;MSTRG.21372;MSTRG.4356;107821641;MSTRG.25236;MSTRG.4882;MSTRG.1807;MSTRG.6590;MSTRG.18267;MSTRG.23627;MSTRG.22828;MSTRG.17126;MSTRG.16762;MSTRG.15728;MSTRG.19227;MSTRG.20652;MSTRG.21382;MSTRG.9210;MSTRG.19811;MSTRG.15477;M…	192	5.33015e-05
GO:0048653	anther development	biological_process	5	107823216;107803280;107762327;107809759;MSTRG.12091;107785538;107781982;107822648;107824419	9	7.18175e-05
GO:0045087	innate immune response	biological_process	5	MSTRG.1082;MSTRG.2070;MSTRG.13261;MSTRG.18528;107805363;MSTRG.12547;MSTRG.19142;MSTRG.12327;MSTRG.2764;MSTRG.12625	10	7.64177e-05
GO:0048442	sepal development	biological_process	6	107760064;107828000;107814687;107794188	4	7.88964e-05
GO:0004069	L-aspartate:2-oxoglutarate aminotransferase activity	molecular_function	7	MSTRG.510;MSTRG.18375;MSTRG.11872;MSTRG.15359;MSTRG.22410	5	9.40754e-05
GO:0045926	negative regulation of growth	biological_process	6	107805141;107779158;107770063	3	9.51862e-05
GO:0009887	animal organ morphogenesis	biological_process	5	107768119;107829997;107817328;MSTRG.24677;107760551;107782674	6	0.000103075
GO:0044183	protein folding chaperone	molecular_function	3	MSTRG.2517;MSTRG.1010;MSTRG.602;MSTRG.5277	4	0.000128468
GO:0042549	photosystem II stabilization	biological_process	9	MSTRG.4904;MSTRG.25632;MSTRG.17965;MSTRG.11426	4	0.000128468
GO:0010287	plastoglobule	cellular_component	8	MSTRG.12630;MSTRG.4358;MSTRG.11426;MSTRG.1422;MSTRG.5678;MSTRG.17965;MSTRG.6061;MSTRG.11222;MSTRG.14182;MSTRG.4904;MSTRG.25632;MSTRG.18533;MSTRG.24317;MSTRG.25654;MSTRG.15728	15	0.000139898
GO:0006457	protein folding	biological_process	4	MSTRG.1308;MSTRG.602;MSTRG.18528;MSTRG.2764;MSTRG.21382;MSTRG.3180;MSTRG.24706;MSTRG.21295;MSTRG.6645;MSTRG.875;MSTRG.6972;MSTRG.4552;MSTRG.1082;MSTRG.19142;MSTRG.4965;MSTRG.12625;MSTRG.3892;MSTRG.11091;MSTRG.14494;MSTRG.17583;MSTRG.13135;MSTRG.19170;MSTRG.9985;MSTRG.20604;MSTRG.7598;MSTRG.4294;MSTRG.10390;107769992	28	0.000142871
GO:0032040	small-subunit processome	cellular_component	6	MSTRG.18843;MSTRG.9810;MSTRG.5077;107830417;107780697;MSTRG.16980;MSTRG.24017;MSTRG.5930;MSTRG.672;MSTRG.6037;107832006	11	0.000171297
GO:0008266	poly(U) RNA binding	molecular_function	9	MSTRG.4904;MSTRG.13261;MSTRG.17965;MSTRG.25632;MSTRG.11426;MSTRG.12327	6	0.000232222
GO:0031118	rRNA pseudouridine synthesis	biological_process	13	107814582;MSTRG.888;MSTRG.11149	3	0.00023281
GO:0031120	snRNA pseudouridine synthesis	biological_process	11	MSTRG.11149;107814582;MSTRG.888	3	0.00023281
GO:0004176	ATP-dependent peptidase activity	molecular_function	11	MSTRG.23861;MSTRG.4038;MSTRG.8530;MSTRG.5385;MSTRG.121;MSTRG.7856;MSTRG.20933;MSTRG.5748;MSTRG.13621	9	0.000351393
GO:0010027	thylakoid membrane organization	biological_process	7	MSTRG.23861;MSTRG.15317;MSTRG.15708;MSTRG.8530;MSTRG.5385;MSTRG.600;MSTRG.23679	7	0.000386964
GO:0016120	carotene biosynthetic process	biological_process	10	MSTRG.18633;MSTRG.3824;MSTRG.16538;MSTRG.22472	4	0.000407951
GO:0010087	phloem or xylem histogenesis	biological_process	6	107817328;MSTRG.23492;107760551;107829997;107768119;MSTRG.15443;MSTRG.24677;107782674	8	0.000412479
GO:0048461	flower structural organization	biological_process	5	MSTRG.25919;MSTRG.15422;107818199	3	0.000455546
GO:0015995	chlorophyll biosynthetic process	biological_process	9	MSTRG.22913;MSTRG.20832;MSTRG.22472;MSTRG.10590;MSTRG.16538;MSTRG.10399;MSTRG.6586;MSTRG.1037	8	0.0004606
GO:0009743	response to carbohydrate	biological_process	6	107760064;107794188;107828000;107814687	4	0.00055804
GO:0010075	regulation of meristem growth	biological_process	7	MSTRG.24677;107829997;107782674;107768119;107760551;107817328	6	0.00063234
GO:0051775	response to redox state	biological_process	4	MSTRG.12181;MSTRG.4012;MSTRG.15344	3	0.000779984
GO:0050278	sedoheptulose-bisphosphatase activity	molecular_function	8	MSTRG.14373;MSTRG.4347;MSTRG.464;MSTRG.4889;MSTRG.19230	5	0.000805155
GO:1903508	positive regulation of nucleic acid-templated transcription	biological_process	10	MSTRG.18776;MSTRG.7846	2	0.00084015
GO:2000306	positive regulation of photomorphogenesis	biological_process	9	MSTRG.7846;MSTRG.18776	2	0.00084015
GO:0006982	response to lipid hydroperoxide	biological_process	6	MSTRG.24417;MSTRG.23711	2	0.00084015
GO:0048032	galacturonate binding	molecular_function	8	MSTRG.22099;MSTRG.621	2	0.00084015
GO:0010335	response to non-ionic osmotic stress	biological_process	6	MSTRG.24417;MSTRG.23711	2	0.00084015
GO:0005212	structural constituent of eye lens	molecular_function	4	MSTRG.14112;MSTRG.4334	2	0.00084015
GO:0036381	pyridoxal 5'-phosphate synthase (glutamine hydrolysing) activity	molecular_function	7	MSTRG.24417;MSTRG.23711	2	0.00084015
GO:0042760	very long-chain fatty acid catabolic process	biological_process	11	MSTRG.22526;MSTRG.12716	2	0.00084015
GO:0004612	phosphoenolpyruvate carboxykinase (ATP) activity	molecular_function	8	MSTRG.2405;MSTRG.969	2	0.00084015
GO:0080056	petal vascular tissue pattern formation	biological_process	7	MSTRG.10163;MSTRG.14754	2	0.00084015
GO:0001736	establishment of planar polarity	biological_process	6	MSTRG.22502;MSTRG.974	2	0.00084015
GO:0005324	long-chain fatty acid transporter activity	molecular_function	5	MSTRG.12716;MSTRG.22526	2	0.00084015
GO:0015910	long-chain fatty acid import into peroxisome	biological_process	10	MSTRG.22526;MSTRG.12716	2	0.00084015
GO:0051738	xanthophyll binding	molecular_function	6	MSTRG.15317;MSTRG.23679	2	0.00084015
GO:0016166	phytoene dehydrogenase activity	molecular_function	6	MSTRG.3824;MSTRG.18633	2	0.00084015
GO:0080057	sepal vascular tissue pattern formation	biological_process	7	MSTRG.14754;MSTRG.10163	2	0.00084015
GO:0008285	negative regulation of cell population proliferation	biological_process	7	MSTRG.26163;MSTRG.18779;107777006;MSTRG.21993;MSTRG.12636	5	0.000964718
GO:0046686	response to cadmium ion	biological_process	7	MSTRG.24656;MSTRG.20604;MSTRG.3795;MSTRG.5240;MSTRG.24317;MSTRG.4012;MSTRG.8315;MSTRG.18310;MSTRG.5018;MSTRG.14494;MSTRG.20220;MSTRG.9905;107798209;MSTRG.17277;MSTRG.14415;MSTRG.8304;MSTRG.26058;MSTRG.9210;MSTRG.19371;MSTRG.19170;MSTRG.19501;MSTRG.2070;MSTRG.11058;MSTRG.23627;MSTRG.21295;MSTRG.12460;MSTRG.15823;MSTRG.3892;MSTRG.15754	29	0.00106903
GO:0019905	syntaxin binding	molecular_function	6	MSTRG.14556;MSTRG.4280;107781411;MSTRG.20723;MSTRG.10449	5	0.00114662
GO:0031429	box H/ACA snoRNP complex	cellular_component	7	MSTRG.888;107814582;MSTRG.11149	3	0.00122106
GO:0019684	photosynthesis, light reaction	biological_process	6	MSTRG.4904;MSTRG.17965;MSTRG.11426;MSTRG.25632	4	0.00123783
GO:0042578	phosphoric ester hydrolase activity	molecular_function	6	107779193;MSTRG.14373;107800842;MSTRG.464	4	0.00155516
GO:0006364	rRNA processing	biological_process	11	MSTRG.5930;MSTRG.22472;MSTRG.7094;MSTRG.10163;107832006;107780697;107830417;MSTRG.14754;MSTRG.16538;107800695	10	0.00158925
GO:0048046	apoplast	cellular_component	4	MSTRG.20799;MSTRG.12181;MSTRG.464;107822384;MSTRG.15754;MSTRG.10206;MSTRG.166;MSTRG.14373;MSTRG.4918;MSTRG.3694;MSTRG.24317;MSTRG.875;MSTRG.14415;MSTRG.4882;MSTRG.8304;MSTRG.4012;MSTRG.22383;MSTRG.18584;MSTRG.5688;MSTRG.5308;MSTRG.20604;MSTRG.5018;MSTRG.15344;MSTRG.2070;MSTRG.7723;MSTRG.16469	26	0.00159313
GO:0003723	RNA binding	molecular_function	6	107793475;MSTRG.7980;107815931;MSTRG.22076;107759364;MSTRG.1513;MSTRG.5862;107802272;MSTRG.24827;MSTRG.22407;MSTRG.6037;MSTRG.10163;MSTRG.5796;107807625;MSTRG.11364;MSTRG.21038;MSTRG.16762;MSTRG.2070;MSTRG.7219;MSTRG.19019;MSTRG.3909;MSTRG.20156;MSTRG.24017;MSTRG.7094;MSTRG.7764;MSTRG.3890;MSTRG.17550;MSTRG.9810;MSTRG.23303;MSTRG.20103;MSTRG.13796;MSTRG.758;107807879;MSTRG.22472;MSTRG.16538;MSTRG…	54	0.00173277
GO:0009624	response to nematode	biological_process	7	MSTRG.26163;107760271;MSTRG.12636;MSTRG.24755;MSTRG.10899;107763641;MSTRG.3028;MSTRG.18147	8	0.00175419
GO:0080115	myosin XI tail binding	molecular_function	9	MSTRG.12815;MSTRG.25347;MSTRG.5218	3	0.00179214
GO:0030742	GTP-dependent protein binding	molecular_function	5	MSTRG.12815;MSTRG.25347;MSTRG.5218	3	0.00179214
GO:0003959	NADPH dehydrogenase activity	molecular_function	6	MSTRG.19187;MSTRG.16701;MSTRG.17979	3	0.00179214
GO:0005777	peroxisome	cellular_component	7	MSTRG.6351;MSTRG.14415;MSTRG.12716;MSTRG.16701;MSTRG.7927;MSTRG.8974;MSTRG.16431;MSTRG.15754;MSTRG.14864;107781288;MSTRG.12179;MSTRG.17275;MSTRG.8596;MSTRG.22526;MSTRG.2070;MSTRG.14719;MSTRG.20799;MSTRG.24661;MSTRG.20945;107799911;MSTRG.25347	21	0.00180504
GO:0051287	NAD binding	molecular_function	6	MSTRG.17126;MSTRG.4012;MSTRG.21299;MSTRG.24405;MSTRG.3045;MSTRG.20761;MSTRG.7307;MSTRG.5818;MSTRG.25536;MSTRG.24095	10	0.00181504
GO:0009654	photosystem II oxygen evolving complex	cellular_component	6	MSTRG.3694;MSTRG.25632;MSTRG.4904;MSTRG.11426;MSTRG.17965;MSTRG.13748	6	0.00182014
GO:0006379	mRNA cleavage	biological_process	10	107817412;MSTRG.11475;MSTRG.20103;107798403	4	0.00192496
GO:0015450	P-P-bond-hydrolysis-driven protein transmembrane transporter activity	molecular_function	7	MSTRG.23424;MSTRG.3220;MSTRG.600;MSTRG.7214;MSTRG.24518	5	0.002135
GO:0010154	fruit development	biological_process	6	107794188;107828000;MSTRG.4012;107814687;107760064	5	0.00245687
GO:0071021	U2-type post-spliceosomal complex	cellular_component	8	MSTRG.9476;MSTRG.18718	2	0.0024718
GO:0004567	beta-mannosidase activity	molecular_function	8	MSTRG.10234;MSTRG.7562	2	0.0024718
GO:0004831	tyrosine-tRNA ligase activity	molecular_function	7	MSTRG.23704;MSTRG.870	2	0.0024718
GO:0045951	positive regulation of mitotic recombination	biological_process	11	107798209;MSTRG.18310	2	0.0024718
GO:0043039	tRNA aminoacylation	biological_process	11	MSTRG.23704;MSTRG.870	2	0.0024718
GO:0008615	pyridoxine biosynthetic process	biological_process	7	MSTRG.24417;MSTRG.23711	2	0.0024718
GO:0004802	transketolase activity	molecular_function	6	MSTRG.17537;MSTRG.3506;MSTRG.10420	3	0.00250514
GO:0080187	floral organ senescence	biological_process	5	MSTRG.15422;MSTRG.25919;107818199	3	0.00250514
GO:0031897	Tic complex	cellular_component	8	MSTRG.1124;MSTRG.18176;MSTRG.4461	3	0.00250514
GO:0009653	anatomical structure morphogenesis	biological_process	4	107766885;MSTRG.11652;107765789	3	0.00250514
GO:0048831	regulation of shoot system development	biological_process	7	MSTRG.9198;MSTRG.15443;MSTRG.1251;MSTRG.23492	4	0.00283856
GO:0008705	methionine synthase activity	molecular_function	8	MSTRG.7239;MSTRG.25568;MSTRG.11929;MSTRG.21371	4	0.00283856
GO:0050667	homocysteine metabolic process	biological_process	10	MSTRG.25568;MSTRG.21371;MSTRG.11929;MSTRG.7239	4	0.00283856
GO:0003871	5-methyltetrahydropteroyltriglutamate-homocysteine S-methyltransferase activity	molecular_function	8	MSTRG.7239;MSTRG.21371;MSTRG.11929;MSTRG.25568	4	0.00283856
GO:0010468	regulation of gene expression	biological_process	7	MSTRG.6683;MSTRG.16564;107789814;107770932;107814567;107781288;107774760;107778036;107820735	9	0.00330698
GO:0016688	L-ascorbate peroxidase activity	molecular_function	5	MSTRG.9210;MSTRG.1989;MSTRG.11058;MSTRG.10360	4	0.00339049
GO:0009543	chloroplast thylakoid lumen	cellular_component	8	MSTRG.813;MSTRG.14490;MSTRG.17965;MSTRG.8315;MSTRG.13748;MSTRG.3694;MSTRG.25632;MSTRG.4904;MSTRG.11426	9	0.003526
GO:0008559	ATPase-coupled xenobiotic transmembrane transporter activity	molecular_function	9	MSTRG.25490;107822384;MSTRG.18214;MSTRG.3400;107764566	5	0.0041021
GO:0004003	ATP-dependent DNA helicase activity	molecular_function	11	107772418;107795952;MSTRG.6912;MSTRG.4521;107767657	5	0.0041021
GO:0000741	karyogamy	biological_process	7	MSTRG.20208;MSTRG.4356;MSTRG.21240	3	0.00439778
GO:0003906	DNA-(apurinic or apyrimidinic site) endonuclease activity	molecular_function	5	107798302;107831378;MSTRG.2682;107811701	4	0.00470413
GO:0005623	cell	cellular_component	3	MSTRG.18044;MSTRG.3892;MSTRG.9024;MSTRG.21295;MSTRG.17278;MSTRG.9318;107811072;MSTRG.18589;MSTRG.19045;MSTRG.2783;MSTRG.4187	11	0.00470529
GO:0010157	response to chlorate	biological_process	6	MSTRG.17583;MSTRG.21382	2	0.00484842
GO:0090071	negative regulation of ribosome biogenesis	biological_process	7	MSTRG.2098;MSTRG.22066	2	0.00484842
GO:0016730	oxidoreductase activity, acting on iron-sulfur proteins as donors	molecular_function	5	MSTRG.15182;MSTRG.4622	2	0.00484842
GO:0071211	protein targeting to vacuole involved in autophagy	biological_process	13	MSTRG.18044;MSTRG.18589	2	0.00484842
GO:0036455	iron-sulfur transferase activity	molecular_function	6	MSTRG.19563;MSTRG.4776	2	0.00484842
GO:0080048	GDP-D-glucose phosphorylase activity	molecular_function	8	MSTRG.6433;MSTRG.26071	2	0.00484842
GO:0043139	5'-3' DNA helicase activity	molecular_function	11	MSTRG.6912;MSTRG.4521	2	0.00484842
GO:0048830	adventitious root development	biological_process	7	107765789;107766885	2	0.00484842
GO:0043457	regulation of cellular respiration	biological_process	8	MSTRG.8935;MSTRG.3683	2	0.00484842
GO:0046554	malate dehydrogenase (NADP+) activity	molecular_function	7	MSTRG.12181;MSTRG.15344	2	0.00484842
GO:0010318	pyrophosphate-dependent phosphofructokinase complex, beta-subunit complex	cellular_component	4	MSTRG.14331;MSTRG.15823	2	0.00484842
GO:0047484	regulation of response to osmotic stress	biological_process	7	MSTRG.25639;MSTRG.2137	2	0.00484842
GO:0004794	L-threonine ammonia-lyase activity	molecular_function	7	MSTRG.23517;MSTRG.433	2	0.00484842
GO:0048359	mucilage metabolic process involved in seed coat development	biological_process	6	MSTRG.19700;MSTRG.20361	2	0.00484842
GO:0009871	jasmonic acid and ethylene-dependent systemic resistance, ethylene mediated signaling pathway	biological_process	8	MSTRG.22502;MSTRG.974	2	0.00484842
GO:0046835	carbohydrate phosphorylation	biological_process	8	MSTRG.275;MSTRG.24283	2	0.00484842
GO:0000789	cytoplasmic chromatin	cellular_component	7	MSTRG.15361;MSTRG.13080	2	0.00484842
GO:0032588	trans-Golgi network membrane	cellular_component	8	MSTRG.5218;MSTRG.12815	2	0.00484842
GO:0009789	positive regulation of abscisic acid-activated signaling pathway	biological_process	9	MSTRG.22502;107805141;MSTRG.12547;MSTRG.974;MSTRG.12179	5	0.00516671
GO:0008237	metallopeptidase activity	molecular_function	7	MSTRG.5385;MSTRG.7856;MSTRG.5748;MSTRG.121;MSTRG.20933;MSTRG.23861;MSTRG.4038;MSTRG.8530	8	0.00531584
GO:0052543	callose deposition in cell wall	biological_process	9	MSTRG.5240;107766885;107765789	3	0.00559473
GO:0005794	Golgi apparatus	cellular_component	6	MSTRG.12625;MSTRG.22083;MSTRG.20110;MSTRG.24880;MSTRG.3400;MSTRG.22860;MSTRG.9463;107776149;MSTRG.24518;MSTRG.1859;MSTRG.9210;MSTRG.20604;MSTRG.2482;107778912;MSTRG.5218;MSTRG.22913;MSTRG.2764;MSTRG.25347;MSTRG.2783;MSTRG.17796;MSTRG.5688;MSTRG.19501;MSTRG.12460;MSTRG.5001;MSTRG.1082;107824392;MSTRG.16418;MSTRG.25093;MSTRG.22704;MSTRG.9024;MSTRG.8162;MSTRG.12815;MSTRG.9318;MSTRG.21651;MSTRG.10590…	71	0.00571785
GO:0004849	uridine kinase activity	molecular_function	9	107798953;MSTRG.10486;MSTRG.3210;MSTRG.15342	4	0.00632203
GO:0043097	pyrimidine nucleoside salvage	biological_process	9	MSTRG.15342;MSTRG.10486;MSTRG.3210;107798953	4	0.00632203
GO:0006206	pyrimidine nucleobase metabolic process	biological_process	9	MSTRG.15342;MSTRG.3210;MSTRG.10486;107798953	4	0.00632203
GO:0051301	cell division	biological_process	4	107781721;107828000;MSTRG.398;MSTRG.22083;107760064;107816234;MSTRG.23724;MSTRG.22502;MSTRG.637;107767633;107810717;107794188;MSTRG.974;107814687;MSTRG.3876;MSTRG.10195;MSTRG.11570;MSTRG.23738;MSTRG.11137;107797209;107772993	21	0.00633891
GO:0010227	floral organ abscission	biological_process	5	MSTRG.18779;107818199;MSTRG.15422;MSTRG.11652;MSTRG.25919	5	0.0064132
GO:0005198	structural molecule activity	molecular_function	3	MSTRG.9493;MSTRG.18533;MSTRG.24118;MSTRG.3456;MSTRG.1488;107792972;MSTRG.16662;MSTRG.5678;MSTRG.20008	9	0.006763
GO:0009533	chloroplast stromal thylakoid	cellular_component	8	MSTRG.8315;MSTRG.10360;MSTRG.1989	3	0.00696837
GO:0031977	thylakoid lumen	cellular_component	6	MSTRG.813;MSTRG.17965;MSTRG.25632;MSTRG.3694;MSTRG.8315;MSTRG.11426;MSTRG.4904	7	0.00700383
GO:0009793	embryo development ending in seed dormancy	biological_process	5	MSTRG.2137;MSTRG.11475;MSTRG.17693;MSTRG.16846;MSTRG.18267;MSTRG.22956;MSTRG.875;MSTRG.11652;107767475;107797717;MSTRG.20398;MSTRG.6806;MSTRG.9210;MSTRG.8795;MSTRG.17943;MSTRG.19622;MSTRG.13819;MSTRG.25639;MSTRG.15043;MSTRG.24532;MSTRG.14331;MSTRG.21382;MSTRG.12672;MSTRG.17583;107800201;MSTRG.11058;MSTRG.3876;MSTRG.11570;MSTRG.18147;MSTRG.23337;MSTRG.20103	31	0.00718366
GO:0048441	petal development	biological_process	6	107828000;107794188;107814687;107760064	4	0.00725374
GO:0022627	cytosolic small ribosomal subunit	cellular_component	8	MSTRG.10694;MSTRG.14086;MSTRG.3302;MSTRG.2938;MSTRG.12144;MSTRG.18892;MSTRG.8890;MSTRG.4821;MSTRG.5930;MSTRG.20619;MSTRG.20530;MSTRG.24434;MSTRG.24366	13	0.00774392
GO:0043531	ADP binding	molecular_function	9	107831631;107780321;107794982;107794624;107812541;107782528;107814885;107809438;107831644;107788791;107814998;107813711;107791176;107775907;107777341;107772123;107811273;107784671;MSTRG.13820;107813818	20	0.00777315
GO:0000703	oxidized pyrimidine nucleobase lesion DNA N-glycosylase activity	molecular_function	9	107798302;107811701	2	0.00792549
GO:0016710	trans-cinnamate 4-monooxygenase activity	molecular_function	7	MSTRG.19352;MSTRG.6937	2	0.00792549
GO:0071048	nuclear retention of unspliced pre-mRNA at the site of transcription	biological_process	8	MSTRG.18718;MSTRG.9476	2	0.00792549
GO:0006285	base-excision repair, AP site formation	biological_process	8	107811701;107798302	2	0.00792549
GO:1902326	positive regulation of chlorophyll biosynthetic process	biological_process	10	MSTRG.19971;MSTRG.1177	2	0.00792549
GO:0004399	histidinol dehydrogenase activity	molecular_function	7	MSTRG.5818;MSTRG.24405	2	0.00792549
GO:0000478	endonucleolytic cleavage involved in rRNA processing	biological_process	11	MSTRG.10163;MSTRG.14754	2	0.00792549
GO:0006094	gluconeogenesis	biological_process	9	MSTRG.969;MSTRG.2405;107814760;MSTRG.4012	4	0.00827159
GO:0051539	4 iron, 4 sulfur cluster binding	molecular_function	6	MSTRG.20761;107811701;MSTRG.4823;MSTRG.2682;MSTRG.19563;MSTRG.13040;MSTRG.3045;MSTRG.4776;107798302	9	0.00838187
GO:0000785	chromatin	cellular_component	6	107808124;MSTRG.24176;107795765;MSTRG.13423;MSTRG.11137;MSTRG.8086	6	0.0084004
GO:0010197	polar nucleus fusion	biological_process	8	MSTRG.20208;MSTRG.21893;MSTRG.4356;MSTRG.21240	4	0.00937861
GO:0010207	photosystem II assembly	biological_process	8	MSTRG.11426;MSTRG.4904;MSTRG.25632;MSTRG.17965	4	0.00937861
GO:0003729	mRNA binding	molecular_function	7	MSTRG.534;MSTRG.3683;MSTRG.2070;MSTRG.22407;MSTRG.604;107798403;MSTRG.11175;MSTRG.8935;107817412;MSTRG.5862	10	0.00947592
GO:0005759	mitochondrial matrix	cellular_component	7	MSTRG.12460;MSTRG.14494;MSTRG.17979;MSTRG.19501;MSTRG.4776;MSTRG.19187;MSTRG.13621;MSTRG.19563;107772210;MSTRG.3396;MSTRG.23220	11	0.00978092
GO:0042132	fructose 1,6-bisphosphate 1-phosphatase activity	molecular_function	10	MSTRG.464;MSTRG.14373;MSTRG.2457	3	0.0102682
GO:0019430	removal of superoxide radicals	biological_process	7	107821372;MSTRG.24282;MSTRG.11683	3	0.0102682
GO:0048471	perinuclear region of cytoplasm	cellular_component	6	MSTRG.22407;MSTRG.5862;MSTRG.11364	3	0.0102682
GO:0006635	fatty acid beta-oxidation	biological_process	11	MSTRG.12716;MSTRG.12179;MSTRG.8596;MSTRG.9078;MSTRG.22526	5	0.0104218
GO:0009733	response to auxin	biological_process	6	MSTRG.18147;107814545;MSTRG.13819;MSTRG.14136;107781721;107816234;107797209;MSTRG.807;MSTRG.18251;MSTRG.15043;MSTRG.9878;107767633;MSTRG.26046;MSTRG.398;MSTRG.8049;107787619;MSTRG.9972;107772993;107822302;MSTRG.10195;MSTRG.25420	21	0.0109912
GO:0016630	protochlorophyllide reductase activity	molecular_function	7	MSTRG.6586;MSTRG.20832	2	0.0116605
GO:0000024	maltose biosynthetic process	biological_process	9	MSTRG.2754;MSTRG.6778	2	0.0116605
GO:0044571	[2Fe-2S] cluster assembly	biological_process	7	MSTRG.19563;MSTRG.4776	2	0.0116605
GO:0009955	adaxial/abaxial pattern specification	biological_process	6	MSTRG.5270;MSTRG.4815	2	0.0116605
GO:0046520	sphingoid biosynthetic process	biological_process	10	MSTRG.20110;107767458	2	0.0116605
GO:0000170	sphingosine hydroxylase activity	molecular_function	5	MSTRG.20110;107767458	2	0.0116605
GO:0000350	generation of catalytic spliceosome for second transesterification step	biological_process	9	MSTRG.9476;MSTRG.18718	2	0.0116605
GO:0016656	monodehydroascorbate reductase (NADH) activity	molecular_function	7	MSTRG.15754;MSTRG.14415	2	0.0116605
GO:0009509	chromoplast	cellular_component	7	MSTRG.3824;MSTRG.18633	2	0.0116605
GO:0019216	regulation of lipid metabolic process	biological_process	7	MSTRG.12299;MSTRG.25447	2	0.0116605
GO:0010323	negative regulation of isopentenyl diphosphate biosynthetic process, methylerythritol 4-phosphate pathway	biological_process	9	MSTRG.22472;MSTRG.16538	2	0.0116605
GO:0000148	1,3-beta-D-glucan synthase complex	cellular_component	6	MSTRG.9343;MSTRG.8773;MSTRG.3754;MSTRG.18532	4	0.0118714
GO:0003843	1,3-beta-D-glucan synthase activity	molecular_function	8	MSTRG.3754;MSTRG.18532;MSTRG.8773;MSTRG.9343	4	0.0118714
GO:0005983	starch catabolic process	biological_process	10	MSTRG.16789;MSTRG.6778;MSTRG.2457;MSTRG.2754;MSTRG.1807	5	0.0124187
GO:0048510	regulation of timing of transition from vegetative to reproductive phase	biological_process	8	107808654;107781982;107822648;107806562;MSTRG.8795;MSTRG.19622;107824419	7	0.0125335
GO:0010304	PSII associated light-harvesting complex II catabolic process	biological_process	9	MSTRG.23861;MSTRG.5385;MSTRG.8530	3	0.014333
GO:0042026	protein refolding	biological_process	5	MSTRG.25292;MSTRG.12460;MSTRG.875	3	0.014333
GO:0005200	structural constituent of cytoskeleton	molecular_function	4	107802509;MSTRG.18457;MSTRG.10195;107759531;MSTRG.11652;MSTRG.8933;MSTRG.3456	7	0.0157963
GO:0030170	pyridoxal phosphate binding	molecular_function	6	MSTRG.22410;MSTRG.18375;MSTRG.10399;MSTRG.433;MSTRG.15359;MSTRG.11872;MSTRG.21493;MSTRG.510;MSTRG.12931;MSTRG.23517;MSTRG.19988;MSTRG.3861;MSTRG.25082	13	0.0158043
GO:0008540	proteasome regulatory particle, base subcomplex	cellular_component	4	MSTRG.17707;MSTRG.24658;MSTRG.12533;MSTRG.25864;MSTRG.25984	5	0.0158755
GO:0015930	glutamate synthase activity	molecular_function	6	MSTRG.24963;MSTRG.5731	2	0.0160126
GO:0019676	ammonia assimilation cycle	biological_process	12	MSTRG.5731;MSTRG.24963	2	0.0160126
GO:0043495	protein membrane anchor	molecular_function	6	MSTRG.1177;MSTRG.19971	2	0.0160126
GO:0007267	cell-cell signaling	biological_process	5	MSTRG.22099;MSTRG.621	2	0.0160126
GO:0004348	glucosylceramidase activity	molecular_function	7	107808883;107777099	2	0.0160126
GO:0042819	vitamin B6 biosynthetic process	biological_process	8	MSTRG.23711;MSTRG.24417	2	0.0160126
GO:0097298	regulation of nucleus size	biological_process	6	MSTRG.15361;MSTRG.13080	2	0.0160126
GO:0035671	enone reductase activity	molecular_function	7	MSTRG.5308;MSTRG.9108	2	0.0160126
GO:0042823	pyridoxal phosphate biosynthetic process	biological_process	8	MSTRG.24417;MSTRG.23711	2	0.0160126
GO:0006680	glucosylceramide catabolic process	biological_process	12	107777099;107808883	2	0.0160126
GO:0009982	pseudouridine synthase activity	molecular_function	6	107814582;107785285;MSTRG.11149;MSTRG.888	4	0.0163447
GO:0010072	primary shoot apical meristem specification	biological_process	5	MSTRG.4815;MSTRG.1024;MSTRG.5270;107784013	4	0.0163447
GO:0006306	DNA methylation	biological_process	10	MSTRG.1513;107814185;MSTRG.2682;MSTRG.8350;107829352	5	0.0171565
GO:0042651	thylakoid membrane	cellular_component	5	MSTRG.19971;MSTRG.16662;MSTRG.1488;MSTRG.1177	4	0.0180403
GO:0071010	prespliceosome	cellular_component	7	MSTRG.10294;MSTRG.485;MSTRG.16671	3	0.0191844
GO:0019899	enzyme binding	molecular_function	5	MSTRG.19971;MSTRG.10399;MSTRG.1177	3	0.0191844
GO:0045036	protein targeting to chloroplast	biological_process	12	MSTRG.3892;MSTRG.3220;MSTRG.21295	3	0.0191844
GO:0005615	extracellular space	cellular_component	4	107809795;MSTRG.16316;MSTRG.22383;MSTRG.7723;MSTRG.5614;MSTRG.16469;MSTRG.4918;MSTRG.5688;MSTRG.20759	9	0.0195081
GO:0005743	mitochondrial inner membrane	cellular_component	6	MSTRG.12672;MSTRG.23385;MSTRG.12716;MSTRG.16431;MSTRG.24046;MSTRG.4371;MSTRG.22526;107800201;MSTRG.16157	9	0.0195081
GO:0009944	polarity specification of adaxial/abaxial axis	biological_process	6	MSTRG.20326;MSTRG.5736;MSTRG.5270;MSTRG.4815	4	0.0198412
GO:0007005	mitochondrion organization	biological_process	6	MSTRG.24393;MSTRG.12460;MSTRG.398;MSTRG.20945	4	0.0198412
GO:0047334	diphosphate-fructose-6-phosphate 1-phosphotransferase activity	molecular_function	8	MSTRG.15823;MSTRG.14331	2	0.0209432
GO:0005652	nuclear lamina	cellular_component	6	MSTRG.13080;MSTRG.15361	2	0.0209432
GO:0052544	defense response by callose deposition in cell wall	biological_process	7	MSTRG.974;MSTRG.22502	2	0.0209432
GO:0009328	phenylalanine-tRNA ligase complex	cellular_component	6	MSTRG.18159;MSTRG.21847	2	0.0209432
GO:0034757	negative regulation of iron ion transport	biological_process	10	MSTRG.23492;MSTRG.15443	2	0.0209432
GO:0035494	SNARE complex disassembly	biological_process	8	MSTRG.4280;MSTRG.20723	2	0.0209432
GO:0051020	GTPase binding	molecular_function	6	107765023;107804274	2	0.0209432
GO:0004654	polyribonucleotide nucleotidyltransferase activity	molecular_function	7	MSTRG.16538;MSTRG.22472	2	0.0209432
GO:1990077	primosome complex	cellular_component	5	MSTRG.4521;MSTRG.6912	2	0.0209432
GO:0015994	chlorophyll metabolic process	biological_process	8	MSTRG.24417;MSTRG.23711	2	0.0209432
GO:0009517	PSII associated light-harvesting complex II	cellular_component	6	MSTRG.23679;MSTRG.15317	2	0.0209432
GO:0045335	phagocytic vesicle	cellular_component	8	MSTRG.23579;MSTRG.21858	2	0.0209432
GO:0008746	NAD(P)+ transhydrogenase activity	molecular_function	7	MSTRG.12181;MSTRG.15344	2	0.0209432
GO:0035061	interchromatin granule	cellular_component	8	MSTRG.5796;MSTRG.19203	2	0.0209432
GO:0010150	leaf senescence	biological_process	6	MSTRG.15443;MSTRG.23492;MSTRG.974;MSTRG.24314;107822302;107787619;107798790;MSTRG.18779;MSTRG.22502	9	0.0211997
GO:0000243	commitment complex	cellular_component	8	MSTRG.16671;MSTRG.13050;MSTRG.485;MSTRG.18837	4	0.0217489
GO:0031595	nuclear proteasome complex	cellular_component	6	MSTRG.17707;MSTRG.25864;MSTRG.25984;MSTRG.7824	4	0.0217489
GO:0043068	positive regulation of programmed cell death	biological_process	8	107770063;107779158;107805141	3	0.0219087
GO:0009735	response to cytokinin	biological_process	6	MSTRG.2070;MSTRG.10399;MSTRG.3220;MSTRG.24827;MSTRG.11058;MSTRG.22076;MSTRG.15823;MSTRG.5001;MSTRG.14494;MSTRG.9210;MSTRG.8304;MSTRG.1422;MSTRG.4358;MSTRG.13357;MSTRG.8315	15	0.0224671
GO:0004579	dolichyl-diphosphooligosaccharide-protein glycotransferase activity	molecular_function	8	MSTRG.7147;MSTRG.22743;MSTRG.23942	3	0.0248326
GO:0003954	NADH dehydrogenase activity	molecular_function	6	MSTRG.16431;MSTRG.3045;MSTRG.20761	3	0.0248326
GO:0006401	RNA catabolic process	biological_process	9	MSTRG.22472;MSTRG.16538;107800695	3	0.0248326
GO:0043231	intracellular membrane-bounded organelle	cellular_component	5	MSTRG.6791;MSTRG.7562;MSTRG.11213;MSTRG.10445;MSTRG.11743;MSTRG.25796;MSTRG.18479;MSTRG.22526;MSTRG.18044;107784090;107793820;107792617;107813106;MSTRG.16282;MSTRG.10234;MSTRG.18589;MSTRG.13135;MSTRG.12716;MSTRG.10463;107795159	20	0.025626
GO:0004351	glutamate decarboxylase activity	molecular_function	7	MSTRG.21493;MSTRG.25082	2	0.0264149
GO:0006536	glutamate metabolic process	biological_process	11	MSTRG.21493;MSTRG.25082	2	0.0264149
GO:0010019	chloroplast-nucleus signaling pathway	biological_process	5	MSTRG.10863;MSTRG.10399	2	0.0264149
GO:0006269	DNA replication, synthesis of RNA primer	biological_process	8	MSTRG.6912;MSTRG.4521	2	0.0264149
GO:0048188	Set1C/COMPASS complex	cellular_component	7	MSTRG.7735;MSTRG.8790	2	0.0264149
GO:0051753	mannan synthase activity	molecular_function	9	MSTRG.20361;MSTRG.23832;MSTRG.19700	3	0.0279559
GO:0005852	eukaryotic translation initiation factor 3 complex	cellular_component	4	MSTRG.12797;MSTRG.17866;MSTRG.16645;MSTRG.8425	4	0.0281265
GO:0014070	response to organic cyclic compound	biological_process	6	MSTRG.12716	1	0.0289963
GO:0090378	seed trichome elongation	biological_process	8	MSTRG.4880	1	0.0289963
GO:0090377	seed trichome initiation	biological_process	5	MSTRG.4880	1	0.0289963
GO:0050017	L-3-cyanoalanine synthase activity	molecular_function	6	MSTRG.20812	1	0.0289963
GO:0030912	response to deep water	biological_process	7	107799160	1	0.0289963
GO:0019499	cyanide metabolic process	biological_process	6	MSTRG.20812	1	0.0289963
GO:0005634	nucleus	cellular_component	6	MSTRG.21993;MSTRG.12718;MSTRG.8795;MSTRG.18591;MSTRG.7313;MSTRG.10899;MSTRG.5144;MSTRG.14138;MSTRG.20652;107829190;MSTRG.21837;MSTRG.20727;107822302;MSTRG.22083;MSTRG.2608;107766835;MSTRG.17943;MSTRG.4815;MSTRG.488;MSTRG.18725;107772123;MSTRG.20398;MSTRG.25066;107787619;107806523;107761409;107808261;MSTRG.11137;107822648;MSTRG.14557;MSTRG.1090;MSTRG.3219;MSTRG.20103;107803429;MSTRG.10839;10777442…	423	0.0301684
GO:0005682	U5 snRNP	cellular_component	8	MSTRG.18718;MSTRG.9476;MSTRG.16671;MSTRG.485	4	0.0304739
GO:0043682	copper-transporting ATPase activity	molecular_function	11	MSTRG.10463;MSTRG.18479;MSTRG.25796	3	0.0312776
GO:0008202	steroid metabolic process	biological_process	6	MSTRG.9108;MSTRG.19008;MSTRG.17665	3	0.0312776
GO:0016485	protein processing	biological_process	8	MSTRG.19778;107809795;MSTRG.4390;MSTRG.8188;MSTRG.10876	5	0.0318181
GO:0000987	proximal promoter sequence-specific DNA binding	molecular_function	9	107766885;107765789	2	0.0323923
GO:0003852	2-isopropylmalate synthase activity	molecular_function	7	MSTRG.19499;MSTRG.9507	2	0.0323923
GO:0009884	cytokinin receptor activity	molecular_function	6	MSTRG.15443;MSTRG.23492	2	0.0323923
GO:0005483	soluble NSF attachment protein activity	molecular_function	6	MSTRG.20723;MSTRG.4280	2	0.0323923
GO:0010208	pollen wall assembly	biological_process	7	107765789;107766885	2	0.0323923
GO:0008878	glucose-1-phosphate adenylyltransferase activity	molecular_function	8	MSTRG.166;MSTRG.3716	2	0.0323923
GO:1901001	negative regulation of response to salt stress	biological_process	7	MSTRG.25639;MSTRG.2137	2	0.0323923
GO:0036092	phosphatidylinositol-3-phosphate biosynthetic process	biological_process	11	107779193;107800842	2	0.0323923
GO:0005034	osmosensor activity	molecular_function	6	MSTRG.15443;MSTRG.23492	2	0.0323923
GO:0016514	SWI/SNF complex	cellular_component	8	MSTRG.20064;MSTRG.7716	2	0.0323923
GO:0010020	chloroplast fission	biological_process	8	MSTRG.7856;MSTRG.1488;MSTRG.16662;MSTRG.4038	4	0.0329333
GO:0005774	vacuolar membrane	cellular_component	7	107828848;MSTRG.25093;107815049;MSTRG.23755;MSTRG.8162;107816557;MSTRG.13135;MSTRG.12460;MSTRG.20723;MSTRG.17014;MSTRG.262;107777277;MSTRG.4280;MSTRG.25490;MSTRG.3220;MSTRG.398;107824392;MSTRG.3400;107779193;MSTRG.4012;MSTRG.12179;107764566;MSTRG.20604;MSTRG.14494;107800842;107822384;MSTRG.23942;MSTRG.18214;MSTRG.21382;MSTRG.16168;MSTRG.22704;MSTRG.17583	32	0.0343598
GO:0046872	metal ion binding	molecular_function	6	107798302;107823216;107822648;MSTRG.26118;MSTRG.12546;MSTRG.451;107762327;107800201;MSTRG.11058;MSTRG.2578;107820023;107770058;MSTRG.25685;107802272;107820735;MSTRG.13425;MSTRG.24283;MSTRG.16157;MSTRG.464;107814567;MSTRG.11609;107809759;107800225;MSTRG.7193;107803280;107803228;MSTRG.2457;MSTRG.211;107785538;MSTRG.15823;MSTRG.5267;107774760;MSTRG.21337;MSTRG.2682;107789814;MSTRG.13773;MSTRG.13692;…	74	0.0348413
GO:0045454	cell redox homeostasis	biological_process	5	MSTRG.17278;MSTRG.26058;MSTRG.24706;MSTRG.25436;MSTRG.603;107821372;MSTRG.22394;MSTRG.6972;MSTRG.9985;MSTRG.14864;MSTRG.19045	11	0.0365417
GO:0017004	cytochrome complex assembly	biological_process	8	MSTRG.12672;107800201;MSTRG.23385	3	0.0385104
GO:0043248	proteasome assembly	biological_process	8	MSTRG.12533;MSTRG.24118;MSTRG.24658	3	0.0385104
GO:0048443	stamen development	biological_process	6	MSTRG.3683;MSTRG.8935	2	0.0388416
GO:0003896	DNA primase activity	molecular_function	10	MSTRG.6912;MSTRG.4521	2	0.0388416
GO:0080117	secondary growth	biological_process	5	MSTRG.15443;MSTRG.23492	2	0.0388416
GO:0008274	gamma-tubulin ring complex	cellular_component	6	107759531;107802509	2	0.0388416
GO:0071470	cellular response to osmotic stress	biological_process	6	MSTRG.22407;MSTRG.5862	2	0.0388416
GO:0042800	histone methyltransferase activity (H3-K4 specific)	molecular_function	10	MSTRG.8790;MSTRG.7735	2	0.0388416
GO:0006537	glutamate biosynthetic process	biological_process	12	MSTRG.24963;MSTRG.5731	2	0.0388416
GO:0009956	radial pattern formation	biological_process	6	MSTRG.20326;MSTRG.5736	2	0.0388416
GO:0005509	calcium ion binding	molecular_function	7	MSTRG.17965;MSTRG.967;MSTRG.25632;MSTRG.15788;MSTRG.13748;MSTRG.26187;MSTRG.22956;MSTRG.3694;MSTRG.4904;MSTRG.11426;107791289;107766667;MSTRG.4248;MSTRG.9024;MSTRG.17960;107787966;MSTRG.13135;MSTRG.15414;MSTRG.16431	19	0.0390707
GO:0009451	RNA modification	biological_process	9	MSTRG.13261;MSTRG.12327;107807435;MSTRG.20613	4	0.0409882
GO:0008250	oligosaccharyltransferase complex	cellular_component	7	MSTRG.22743;MSTRG.23942;MSTRG.7147	3	0.0424174
GO:0019104	DNA N-glycosylase activity	molecular_function	7	107811701;MSTRG.2682;107798302	3	0.0424174
GO:0008289	lipid binding	molecular_function	4	107817328;107782674;MSTRG.4815;107760551;MSTRG.5270;MSTRG.20326;MSTRG.18584;MSTRG.4882;107768119;MSTRG.24677;107829997;MSTRG.5736	12	0.0424846
GO:0030276	clathrin binding	molecular_function	5	MSTRG.23755;MSTRG.22860;MSTRG.17205;MSTRG.20008;MSTRG.9493	5	0.0425559
GO:0006096	glycolytic process	biological_process	10	MSTRG.10420;MSTRG.24317;MSTRG.4012;MSTRG.15823;MSTRG.7307;107814760;MSTRG.15342;MSTRG.14331;MSTRG.22828	9	0.0428005
GO:0004222	metalloendopeptidase activity	molecular_function	8	MSTRG.19778;MSTRG.10876;MSTRG.4390;MSTRG.8188;MSTRG.10837	5	0.0449348
GO:0006407	rRNA export from nucleus	biological_process	11	MSTRG.2938;MSTRG.10694	2	0.0457304
GO:0000386	second spliceosomal transesterification activity	molecular_function	5	MSTRG.9476;MSTRG.18718	2	0.0457304
GO:0034715	pICln-Sm protein complex	cellular_component	6	MSTRG.485;MSTRG.16671	2	0.0457304
GO:0070370	cellular heat acclimation	biological_process	7	MSTRG.25802;MSTRG.11281	2	0.0457304
GO:0000395	mRNA 5'-splice site recognition	biological_process	10	107786983;MSTRG.18837	2	0.0457304
GO:0009523	photosystem II	cellular_component	7	MSTRG.8315;MSTRG.15317;MSTRG.23679	3	0.0465149
GO:0009514	glyoxysome	cellular_component	8	107799911;MSTRG.12179;107763835	3	0.0465149
GO:0009532	plastid stroma	cellular_component	7	MSTRG.21295;MSTRG.1488;MSTRG.16662;MSTRG.3892	4	0.0469233
