# Supplementary material for: Small RNA and Degradome Sequencing Reveal Important MicroRNA Function in Nicotiana tabacum Response to Bemisia tabaci
Source: MDPI journal article supplement (doi:10.3390/genes13020361), 2022-02-17
Supplement: s1 [file Supplementary Table S9_20220216.xlsx]

## Sheet: Table S9
Table S9. miRNA-target modules in plant-pathogen interactions. Statistical significance was evaluated using Fisher's exact test, the P value colored with red was evaluated at P<0.01, the blue was at P<0.05.
Site ID	Query	Transcript	Gene ID	Gene name	Description	GO	KEGG	Degradome P value
XM_016649820.1:907	nta-miR156g_L+1	XM_016649820.1	107823216	LOC107823216	PREDICTED: squamosa promoter-binding-like protein 9 [Nicotiana tabacum]	GO:0003677(DNA binding);GO:0003700(transcription factor activity, sequence-specific DNA binding);GO:0005634(nucleus);GO:0006351(transcription, DNA-templated);GO:0006355(regulation of transcription, DNA-templated);GO:0008361(regulation of cell size);GO:0010228(vegetative to reproductive phase transition of meristem);GO:0042127(regulation of cell proliferation);GO:0046872(metal ion binding);GO:0048…	NA	0.00231404
XM_016649220.1:1498	nta-miR156g_L+1	XM_016649220.1	107822648	LOC107822648	PREDICTED: squamosa promoter-binding-like protein 12 isoform X3 [Nicotiana tabacum]	GO:0003677(DNA binding);GO:0003700(transcription factor activity, sequence-specific DNA binding);GO:0005634(nucleus);GO:0006351(transcription, DNA-templated);GO:0006355(regulation of transcription, DNA-templated);GO:0044212(transcription regulatory region DNA binding);GO:0046872(metal ion binding);GO:0048510(regulation of timing of transition from vegetative to reproductive phase);GO:0048653(anth…	01210(2-Oxocarboxylic acid metabolism);01230(Biosynthesis of amino acids);00220(Arginine biosynthesis);00220(Arginine biosynthesis)	0.00246519
XM_016643476.1:653	nta-miR156g_L+1	XM_016643476.1	107817617	LOC107817617	PREDICTED: squamosa promoter-binding-like protein 9 [Nicotiana tabacum]	NA	NA	0.00260291
XM_016642884.1:1185	nta-miR156g_L+1	XM_016642884.1	107817110	LOC107817110	PREDICTED: squamosa promoter-binding-like protein 9 [Nicotiana tabacum]	NA	NA	0.00289171
XM_016602806.1:1828	nta-miR156g_L+1	XM_016602806.1	107781982	LOC107781982	PREDICTED: squamosa promoter-binding-like protein 2 [Nicotiana sylvestris]	GO:0003677(DNA binding);GO:0003700(transcription factor activity, sequence-specific DNA binding);GO:0005634(nucleus);GO:0006351(transcription, DNA-templated);GO:0006355(regulation of transcription, DNA-templated);GO:0044212(transcription regulatory region DNA binding);GO:0046872(metal ion binding);GO:0048510(regulation of timing of transition from vegetative to reproductive phase);GO:0048653(anth…	NA	0.00606293
XM_016626963.1:1503	nta-miR156f	XM_016626963.1	107803280	LOC107803280	PREDICTED: squamosa promoter-binding-like protein 16 [Nicotiana tabacum]	GO:0003677(DNA binding);GO:0003700(transcription factor activity, sequence-specific DNA binding);GO:0005634(nucleus);GO:0006351(transcription, DNA-templated);GO:0006355(regulation of transcription, DNA-templated);GO:0046872(metal ion binding);GO:0048653(anther development);GO:0048653(anther development)	NA	0.00635072
XM_016588078.1:1269	nta-miR156f	XM_016588078.1	MSTRG.12091	LOC107768912	teosinte glume architecture 1-like [Nicotiana tabacum]	GO:0003677(DNA binding);GO:0003700(transcription factor activity, sequence-specific DNA binding);GO:0005634(nucleus);GO:0006351(transcription, DNA-templated);GO:0006355(regulation of transcription, DNA-templated);GO:0046872(metal ion binding);GO:0048653(anther development);GO:0048653(anther development)	NA	0.00663843
XM_016602798.1:2549	nta-miR156g_L+1	XM_016602798.1	107781982	LOC107781982	PREDICTED: squamosa promoter-binding-like protein 2 [Nicotiana sylvestris]	GO:0003677(DNA binding);GO:0003700(transcription factor activity, sequence-specific DNA binding);GO:0005634(nucleus);GO:0006351(transcription, DNA-templated);GO:0006355(regulation of transcription, DNA-templated);GO:0044212(transcription regulatory region DNA binding);GO:0046872(metal ion binding);GO:0048510(regulation of timing of transition from vegetative to reproductive phase);GO:0048653(anth…	NA	0.00807573
XM_016626966.1:1506	nta-miR156f	XM_016626966.1	107803280	LOC107803280	PREDICTED: squamosa promoter-binding-like protein 16 [Nicotiana tabacum]	GO:0003677(DNA binding);GO:0003700(transcription factor activity, sequence-specific DNA binding);GO:0005634(nucleus);GO:0006351(transcription, DNA-templated);GO:0006355(regulation of transcription, DNA-templated);GO:0046872(metal ion binding);GO:0048653(anther development);GO:0048653(anther development)	NA	0.00893711
XM_016588077.1:1972	nta-miR156a	XM_016588077.1	MSTRG.12091	LOC107768912	teosinte glume architecture 1-like [Nicotiana tabacum]	GO:0003677(DNA binding);GO:0003700(transcription factor activity, sequence-specific DNA binding);GO:0005634(nucleus);GO:0006351(transcription, DNA-templated);GO:0006355(regulation of transcription, DNA-templated);GO:0046872(metal ion binding);GO:0048653(anther development);GO:0048653(anther development)	NA	0.00982438
XM_016630732.1:894	nta-miR156a	XM_016630732.1	107806562	LOC107806562	PREDICTED: squamosa promoter-binding-like protein 7 isoform X2 [Nicotiana sylvestris]	GO:0003677(DNA binding);GO:0003700(transcription factor activity, sequence-specific DNA binding);GO:0005634(nucleus);GO:0006351(transcription, DNA-templated);GO:0006355(regulation of transcription, DNA-templated);GO:0046872(metal ion binding);GO:0048510(regulation of timing of transition from vegetative to reproductive phase)	04075(Plant hormone signal transduction)	0.0112021
XM_016588081.1:1078	nta-miR156g_L+1	XM_016588081.1	MSTRG.12091	LOC107768912	teosinte glume architecture 1-like [Nicotiana tabacum]	GO:0003677(DNA binding);GO:0003700(transcription factor activity, sequence-specific DNA binding);GO:0005634(nucleus);GO:0006351(transcription, DNA-templated);GO:0006355(regulation of transcription, DNA-templated);GO:0046872(metal ion binding);GO:0048653(anther development);GO:0048653(anther development)	NA	0.0123752
XM_016598217.1:1420	nta-miR156a	XM_016598217.1	107778036	LOC107778036	squamosa promoter-binding-like protein 6 [Nicotiana tabacum]	GO:0003677(DNA binding);GO:0003700(transcription factor activity, sequence-specific DNA binding);GO:0005634(nucleus);GO:0006351(transcription, DNA-templated);GO:0006355(regulation of transcription, DNA-templated);GO:0010468(regulation of gene expression);GO:0042742(defense response to bacterium);GO:0046872(metal ion binding)	NA	0.0123752
XM_016588079.1:1273	nta-miR156g_L+1	XM_016588079.1	MSTRG.12091	LOC107768912	teosinte glume architecture 1-like [Nicotiana tabacum]	GO:0003677(DNA binding);GO:0003700(transcription factor activity, sequence-specific DNA binding);GO:0005634(nucleus);GO:0006351(transcription, DNA-templated);GO:0006355(regulation of transcription, DNA-templated);GO:0046872(metal ion binding);GO:0048653(anther development);GO:0048653(anther development)	NA	0.0132328
XM_016647076.1:1431	nta-miR156a	XM_016647076.1	107820735	LOC107820735	PREDICTED: squamosa promoter-binding-like protein 6 [Nicotiana sylvestris]	GO:0003677(DNA binding);GO:0003700(transcription factor activity, sequence-specific DNA binding);GO:0005634(nucleus);GO:0006351(transcription, DNA-templated);GO:0006355(regulation of transcription, DNA-templated);GO:0010468(regulation of gene expression);GO:0042742(defense response to bacterium);GO:0046872(metal ion binding)	NA	0.0132328
XM_016626964.1:1175	nta-miR156g_L+1	XM_016626964.1	107803280	LOC107803280	PREDICTED: squamosa promoter-binding-like protein 16 [Nicotiana tabacum]	GO:0003677(DNA binding);GO:0003700(transcription factor activity, sequence-specific DNA binding);GO:0005634(nucleus);GO:0006351(transcription, DNA-templated);GO:0006355(regulation of transcription, DNA-templated);GO:0046872(metal ion binding);GO:0048653(anther development);GO:0048653(anther development)	NA	0.0140897
XM_016611687.1:1643	nta-miR156f	XM_016611687.1	107789814	LOC107789814	squamosa promoter-binding-like protein 6 [Nicotiana tabacum]	GO:0003677(DNA binding);GO:0003700(transcription factor activity, sequence-specific DNA binding);GO:0005634(nucleus);GO:0006351(transcription, DNA-templated);GO:0006355(regulation of transcription, DNA-templated);GO:0010468(regulation of gene expression);GO:0042742(defense response to bacterium);GO:0046872(metal ion binding)	NA	0.0143752
XM_016594406.1:1616	nta-miR156f	XM_016594406.1	107774760	LOC107774760	squamosa promoter-binding-like protein 6 [Nicotiana tabacum]	GO:0003677(DNA binding);GO:0003700(transcription factor activity, sequence-specific DNA binding);GO:0005634(nucleus);GO:0006351(transcription, DNA-templated);GO:0006355(regulation of transcription, DNA-templated);GO:0010468(regulation of gene expression);GO:0042742(defense response to bacterium);GO:0046872(metal ion binding);GO:0046872(metal ion binding)	NA	0.0146606
XM_016594405.1:1616	nta-miR156f	XM_016594405.1	107774760	LOC107774760	squamosa promoter-binding-like protein 6 [Nicotiana tabacum]	GO:0003677(DNA binding);GO:0003700(transcription factor activity, sequence-specific DNA binding);GO:0005634(nucleus);GO:0006351(transcription, DNA-templated);GO:0006355(regulation of transcription, DNA-templated);GO:0010468(regulation of gene expression);GO:0042742(defense response to bacterium);GO:0046872(metal ion binding);GO:0046872(metal ion binding)	NA	0.0149459
XM_016590259.1:1792	nta-miR156a	XM_016590259.1	107770932	LOC107770932	squamosa promoter-binding-like protein 6 [Nicotiana tabacum]	GO:0003677(DNA binding);GO:0003700(transcription factor activity, sequence-specific DNA binding);GO:0005634(nucleus);GO:0006351(transcription, DNA-templated);GO:0006355(regulation of transcription, DNA-templated);GO:0010468(regulation of gene expression);GO:0042742(defense response to bacterium);GO:0046872(metal ion binding)	NA	0.0177943
XM_016588077.1:1973	nta-miR156g_L+1	XM_016588077.1	MSTRG.12091	LOC107768912	teosinte glume architecture 1-like [Nicotiana tabacum]	GO:0003677(DNA binding);GO:0003700(transcription factor activity, sequence-specific DNA binding);GO:0005634(nucleus);GO:0006351(transcription, DNA-templated);GO:0006355(regulation of transcription, DNA-templated);GO:0046872(metal ion binding);GO:0048653(anther development);GO:0048653(anther development)	NA	0.0179376
XM_016640008.1:1758	nta-miR156a	XM_016640008.1	107814567	LOC107814567	squamosa promoter-binding-like protein 6 [Nicotiana tabacum]	GO:0003677(DNA binding);GO:0003700(transcription factor activity, sequence-specific DNA binding);GO:0005634(nucleus);GO:0006351(transcription, DNA-templated);GO:0006355(regulation of transcription, DNA-templated);GO:0010468(regulation of gene expression);GO:0042742(defense response to bacterium);GO:0046872(metal ion binding)	NA	0.0180787
XM_016610544.1:825	nta-MIR156c-p3_1ss22TC	XM_016610544.1	MSTRG.18589	LOC107788815	PREDICTED: ATG8-interacting protein 1 isoform X2 [Nicotiana tabacum]	GO:0005515(protein binding);GO:0005622(intracellular);GO:0005623(cell);GO:0005634(nucleus);GO:0005783(endoplasmic reticulum);GO:0005789(endoplasmic reticulum membrane);GO:0005829(cytosol);GO:0009570(chloroplast stroma);GO:0016021(integral component of membrane);GO:0031969(chloroplast membrane);GO:0043231(intracellular membrane-bounded organelle);GO:0071211(protein targeting to vacuole involved in…	NA	0.0219692
XM_016624337.1:942	nta-miR6156	XM_016624337.1	107801070	LOC107801070	PREDICTED: cytochrome P450 724B1-like [Nicotiana tabacum]	GO:0004497(monooxygenase activity);GO:0007275(multicellular organism development);GO:0010268(brassinosteroid homeostasis);GO:0016125(sterol metabolic process);GO:0016132(brassinosteroid biosynthetic process)	00905(Brassinosteroid biosynthesis)	0.0498907
XM_016599515.1:1358	nta-miR159	XM_016599515.1	107779158	LOC107779158	PREDICTED: transcription factor GAMYB-like isoform X1 [Nicotiana tabacum]	GO:0003677(DNA binding);GO:0003700(transcription factor activity, sequence-specific DNA binding);GO:0005634(nucleus);GO:0006355(regulation of transcription, DNA-templated);GO:0009723(response to ethylene);GO:0009740(gibberellic acid mediated signaling pathway);GO:0009751(response to salicylic acid);GO:0043068(positive regulation of programmed cell death);GO:0045893(positive regulation of transcri…	04626(Plant-pathogen interaction);04626(Plant-pathogen interaction)	0.000579012
XM_016589328.1:1020	nta-miR159	XM_016589328.1	107770063	LOC107770063	PREDICTED: transcription factor GAMYB-like, partial [Nicotiana tabacum]	GO:0003677(DNA binding);GO:0003700(transcription factor activity, sequence-specific DNA binding);GO:0005634(nucleus);GO:0006355(regulation of transcription, DNA-templated);GO:0009723(response to ethylene);GO:0009740(gibberellic acid mediated signaling pathway);GO:0009751(response to salicylic acid);GO:0043068(positive regulation of programmed cell death);GO:0045893(positive regulation of transcri…	04626(Plant-pathogen interaction)	0.000868392
XM_016612555.1:1351	nta-miR159	XM_016612555.1	#N/A	#N/A	#N/A	#N/A	#N/A	0.00115769
XM_016612548.1:1507	nta-miR159	XM_016612548.1	107790595	LOC107790595	PREDICTED: transcription factor GAMYB-like [Nicotiana sylvestris]	GO:0003677(DNA binding);GO:0003700(transcription factor activity, sequence-specific DNA binding);GO:0005634(nucleus);GO:0006355(regulation of transcription, DNA-templated);GO:0006355(regulation of transcription, DNA-templated)	04626(Plant-pathogen interaction);04626(Plant-pathogen interaction)	0.0014469
XM_016649111.1:1686	nta-miR159	XM_016649111.1	107822559	LOC107822559	PREDICTED: transcription factor GAMYB-like [Nicotiana tabacum]	GO:0003677(DNA binding);GO:0003700(transcription factor activity, sequence-specific DNA binding);GO:0005634(nucleus);GO:0006355(regulation of transcription, DNA-templated)	04626(Plant-pathogen interaction)	0.00173603
XM_016612561.1:1475	nta-miR159	XM_016612561.1	107790595	LOC107790595	PREDICTED: transcription factor GAMYB-like [Nicotiana sylvestris]	GO:0003677(DNA binding);GO:0003700(transcription factor activity, sequence-specific DNA binding);GO:0005634(nucleus);GO:0006355(regulation of transcription, DNA-templated);GO:0006355(regulation of transcription, DNA-templated)	04626(Plant-pathogen interaction);04626(Plant-pathogen interaction)	0.00202508
XM_016612569.1:1318	nta-miR159	XM_016612569.1	#N/A	#N/A	#N/A	#N/A	#N/A	0.00231404
XM_016629135.1:1728	nta-miR159	XM_016629135.1	107805141	LOC107805141	PREDICTED: transcription factor GAMYB-like isoform X1 [Nicotiana tabacum]	GO:0003677(DNA binding);GO:0003700(transcription factor activity, sequence-specific DNA binding);GO:0005634(nucleus);GO:0006355(regulation of transcription, DNA-templated);GO:0009723(response to ethylene);GO:0009740(gibberellic acid mediated signaling pathway);GO:0009751(response to salicylic acid);GO:0043068(positive regulation of programmed cell death);GO:0045893(positive regulation of transcri…	04626(Plant-pathogen interaction);04626(Plant-pathogen interaction)	0.00289171
XM_016629136.1:1696	nta-miR159	XM_016629136.1	107805141	LOC107805141	PREDICTED: transcription factor GAMYB-like isoform X1 [Nicotiana tabacum]	GO:0003677(DNA binding);GO:0003700(transcription factor activity, sequence-specific DNA binding);GO:0005634(nucleus);GO:0006355(regulation of transcription, DNA-templated);GO:0009723(response to ethylene);GO:0009740(gibberellic acid mediated signaling pathway);GO:0009751(response to salicylic acid);GO:0043068(positive regulation of programmed cell death);GO:0045893(positive regulation of transcri…	04626(Plant-pathogen interaction);04626(Plant-pathogen interaction)	0.00318042
XM_016629134.1:1728	nta-miR159	XM_016629134.1	#N/A	#N/A	#N/A	#N/A	#N/A	0.00346905
XM_016642363.1:121	nta-miR159	XM_016642363.1	107816633	LOC107816633	PREDICTED: transcription factor GAMYB-like [Nicotiana tomentosiformis]	GO:0003677(DNA binding);GO:0003700(transcription factor activity, sequence-specific DNA binding);GO:0005634(nucleus);GO:0006355(regulation of transcription, DNA-templated);GO:0048235(pollen sperm cell differentiation)	04626(Plant-pathogen interaction)	0.00375759
XM_016599514.1:970	nta-miR159	XM_016599514.1	107779158	LOC107779158	PREDICTED: transcription factor GAMYB-like isoform X1 [Nicotiana tabacum]	GO:0003677(DNA binding);GO:0003700(transcription factor activity, sequence-specific DNA binding);GO:0005634(nucleus);GO:0006355(regulation of transcription, DNA-templated);GO:0009723(response to ethylene);GO:0009740(gibberellic acid mediated signaling pathway);GO:0009751(response to salicylic acid);GO:0043068(positive regulation of programmed cell death);GO:0045893(positive regulation of transcri…	04626(Plant-pathogen interaction);04626(Plant-pathogen interaction)	0.012713
XM_016596543.1:1484	nta-miR159	XM_016596543.1	107776631	LOC107776631	PREDICTED: uncharacterized protein LOC107776631 [Nicotiana tabacum]	NA	04144(Endocytosis)	0.0155162
XR_001643794.1:1460	nta-miR160a	XR_001643794.1	107766885	LOC107766885	PREDICTED: auxin response factor 17 [Nicotiana tomentosiformis]	GO:0000987(core promoter proximal region sequence-specific DNA binding);GO:0003700(transcription factor activity, sequence-specific DNA binding);GO:0005634(nucleus);GO:0006351(transcription, DNA-templated);GO:0006355(regulation of transcription, DNA-templated);GO:0009555(pollen development);GO:0009653(anatomical structure morphogenesis);GO:0009734(auxin-activated signaling pathway);GO:0010208(pol…	04075(Plant hormone signal transduction);04075(Plant hormone signal transduction)	0.000289548
XM_016585764.1:1461	nta-miR160d	XM_016585764.1	107766885	LOC107766885	PREDICTED: auxin response factor 17 [Nicotiana tomentosiformis]	GO:0000987(core promoter proximal region sequence-specific DNA binding);GO:0003700(transcription factor activity, sequence-specific DNA binding);GO:0005634(nucleus);GO:0006351(transcription, DNA-templated);GO:0006355(regulation of transcription, DNA-templated);GO:0009555(pollen development);GO:0009653(anatomical structure morphogenesis);GO:0009734(auxin-activated signaling pathway);GO:0010208(pol…	04075(Plant hormone signal transduction);04075(Plant hormone signal transduction)	0.000579012
XM_016655250.1:1487	nta-miR160a	XM_016655250.1	107828000	LOC107828000	PREDICTED: auxin response factor 18-like [Nicotiana tabacum]	GO:0003677(DNA binding);GO:0003700(transcription factor activity, sequence-specific DNA binding);GO:0005634(nucleus);GO:0006351(transcription, DNA-templated);GO:0006355(regulation of transcription, DNA-templated);GO:0007389(pattern specification process);GO:0009734(auxin-activated signaling pathway);GO:0009738(abscisic acid-activated signaling pathway);GO:0009743(response to carbohydrate);GO:0010…	04075(Plant hormone signal transduction);04075(Plant hormone signal transduction)	0.000579012
XM_016641934.1:2164	nta-miR160d	XM_016641934.1	107816234	LOC107816234	PREDICTED: auxin response factor 18-like isoform X1 [Nicotiana tabacum]	GO:0003677(DNA binding);GO:0003700(transcription factor activity, sequence-specific DNA binding);GO:0005634(nucleus);GO:0006351(transcription, DNA-templated);GO:0006355(regulation of transcription, DNA-templated);GO:0007389(pattern specification process);GO:0009733(response to auxin);GO:0009734(auxin-activated signaling pathway);GO:0035198(miRNA binding);GO:0048829(root cap development);GO:005130…	04075(Plant hormone signal transduction);04075(Plant hormone signal transduction)	0.000868392
XR_001643507.1:1455	nta-miR160d	XR_001643507.1	107765789	LOC107765789	PREDICTED: auxin response factor 17 [Nicotiana sylvestris]	GO:0000987(core promoter proximal region sequence-specific DNA binding);GO:0003700(transcription factor activity, sequence-specific DNA binding);GO:0005634(nucleus);GO:0006351(transcription, DNA-templated);GO:0006355(regulation of transcription, DNA-templated);GO:0009555(pollen development);GO:0009653(anatomical structure morphogenesis);GO:0009734(auxin-activated signaling pathway);GO:0010208(pol…	04075(Plant hormone signal transduction);04075(Plant hormone signal transduction)	0.00115769
XM_016640134.1:1908	nta-miR160d	XM_016640134.1	107814687	LOC107814687	PREDICTED: auxin response factor 18-like isoform X1 [Nicotiana tabacum]	GO:0003677(DNA binding);GO:0003700(transcription factor activity, sequence-specific DNA binding);GO:0005634(nucleus);GO:0006351(transcription, DNA-templated);GO:0006355(regulation of transcription, DNA-templated);GO:0007389(pattern specification process);GO:0009734(auxin-activated signaling pathway);GO:0009738(abscisic acid-activated signaling pathway);GO:0009743(response to carbohydrate);GO:0010…	04075(Plant hormone signal transduction);04075(Plant hormone signal transduction)	0.0014469
XM_016584484.1:1455	nta-miR160d	XM_016584484.1	107765789	LOC107765789	PREDICTED: auxin response factor 17 [Nicotiana sylvestris]	GO:0000987(core promoter proximal region sequence-specific DNA binding);GO:0003700(transcription factor activity, sequence-specific DNA binding);GO:0005634(nucleus);GO:0006351(transcription, DNA-templated);GO:0006355(regulation of transcription, DNA-templated);GO:0009555(pollen development);GO:0009653(anatomical structure morphogenesis);GO:0009734(auxin-activated signaling pathway);GO:0010208(pol…	04075(Plant hormone signal transduction);04075(Plant hormone signal transduction)	0.00173603
XM_016602462.1:1586	nta-miR160a	XM_016602462.1	107781721	LOC107781721	PREDICTED: auxin response factor 16-like [Nicotiana tomentosiformis]	GO:0003677(DNA binding);GO:0003700(transcription factor activity, sequence-specific DNA binding);GO:0005634(nucleus);GO:0006351(transcription, DNA-templated);GO:0006355(regulation of transcription, DNA-templated);GO:0007389(pattern specification process);GO:0009733(response to auxin);GO:0009734(auxin-activated signaling pathway);GO:0035198(miRNA binding);GO:0048829(root cap development);GO:005130…	04075(Plant hormone signal transduction)	0.00202508
XM_016640136.1:1853	nta-miR160d	XM_016640136.1	107814687	LOC107814687	PREDICTED: auxin response factor 18-like isoform X1 [Nicotiana tabacum]	GO:0003677(DNA binding);GO:0003700(transcription factor activity, sequence-specific DNA binding);GO:0005634(nucleus);GO:0006351(transcription, DNA-templated);GO:0006355(regulation of transcription, DNA-templated);GO:0007389(pattern specification process);GO:0009734(auxin-activated signaling pathway);GO:0009738(abscisic acid-activated signaling pathway);GO:0009743(response to carbohydrate);GO:0010…	04075(Plant hormone signal transduction);04075(Plant hormone signal transduction)	0.00202508
XM_016640135.1:1644	nta-miR160d	XM_016640135.1	#N/A	#N/A	#N/A	#N/A	#N/A	0.00231404
XM_016620081.1:2188	nta-miR160d	XM_016620081.1	107797209	LOC107797209	PREDICTED: auxin response factor 18-like isoform X1 [Nicotiana tabacum]	GO:0003677(DNA binding);GO:0003700(transcription factor activity, sequence-specific DNA binding);GO:0005634(nucleus);GO:0006351(transcription, DNA-templated);GO:0006355(regulation of transcription, DNA-templated);GO:0007389(pattern specification process);GO:0009733(response to auxin);GO:0009734(auxin-activated signaling pathway);GO:0035198(miRNA binding);GO:0048829(root cap development);GO:005130…	04075(Plant hormone signal transduction);04075(Plant hormone signal transduction)	0.00260291
XM_016655249.1:1508	nta-miR160a	XM_016655249.1	107828000	LOC107828000	PREDICTED: auxin response factor 18-like [Nicotiana tabacum]	GO:0003677(DNA binding);GO:0003700(transcription factor activity, sequence-specific DNA binding);GO:0005634(nucleus);GO:0006351(transcription, DNA-templated);GO:0006355(regulation of transcription, DNA-templated);GO:0007389(pattern specification process);GO:0009734(auxin-activated signaling pathway);GO:0009738(abscisic acid-activated signaling pathway);GO:0009743(response to carbohydrate);GO:0010…	04075(Plant hormone signal transduction);04075(Plant hormone signal transduction)	0.00260291
XM_016641933.1:2161	nta-miR160d	XM_016641933.1	107816234	LOC107816234	PREDICTED: auxin response factor 18-like isoform X1 [Nicotiana tabacum]	GO:0003677(DNA binding);GO:0003700(transcription factor activity, sequence-specific DNA binding);GO:0005634(nucleus);GO:0006351(transcription, DNA-templated);GO:0006355(regulation of transcription, DNA-templated);GO:0007389(pattern specification process);GO:0009733(response to auxin);GO:0009734(auxin-activated signaling pathway);GO:0035198(miRNA binding);GO:0048829(root cap development);GO:005130…	04075(Plant hormone signal transduction);04075(Plant hormone signal transduction)	0.00289171
XM_016586695.1:14	nta-miR160d	XM_016586695.1	107767633	LOC107767633	PREDICTED: auxin response factor 18-like isoform X1 [Nicotiana tomentosiformis]	GO:0003677(DNA binding);GO:0003700(transcription factor activity, sequence-specific DNA binding);GO:0005634(nucleus);GO:0006351(transcription, DNA-templated);GO:0006355(regulation of transcription, DNA-templated);GO:0007389(pattern specification process);GO:0009733(response to auxin);GO:0009734(auxin-activated signaling pathway);GO:0035198(miRNA binding);GO:0048829(root cap development);GO:005130…	04075(Plant hormone signal transduction)	0.00318042
XM_016620080.1:2185	nta-miR160d	XM_016620080.1	107797209	LOC107797209	PREDICTED: auxin response factor 18-like isoform X1 [Nicotiana tabacum]	GO:0003677(DNA binding);GO:0003700(transcription factor activity, sequence-specific DNA binding);GO:0005634(nucleus);GO:0006351(transcription, DNA-templated);GO:0006355(regulation of transcription, DNA-templated);GO:0007389(pattern specification process);GO:0009733(response to auxin);GO:0009734(auxin-activated signaling pathway);GO:0035198(miRNA binding);GO:0048829(root cap development);GO:005130…	04075(Plant hormone signal transduction);04075(Plant hormone signal transduction)	0.00346905
XM_016655248.1:1929	nta-miR160a	XM_016655248.1	107828000	LOC107828000	PREDICTED: auxin response factor 18-like [Nicotiana tabacum]	GO:0003677(DNA binding);GO:0003700(transcription factor activity, sequence-specific DNA binding);GO:0005634(nucleus);GO:0006351(transcription, DNA-templated);GO:0006355(regulation of transcription, DNA-templated);GO:0007389(pattern specification process);GO:0009734(auxin-activated signaling pathway);GO:0009738(abscisic acid-activated signaling pathway);GO:0009743(response to carbohydrate);GO:0010…	04075(Plant hormone signal transduction);04075(Plant hormone signal transduction)	0.00375759
XM_016592446.1:140	nta-miR160a	XM_016592446.1	107772993	LOC107772993	PREDICTED: auxin response factor 16-like [Nicotiana sylvestris]	GO:0003677(DNA binding);GO:0003700(transcription factor activity, sequence-specific DNA binding);GO:0005634(nucleus);GO:0006351(transcription, DNA-templated);GO:0006355(regulation of transcription, DNA-templated);GO:0007389(pattern specification process);GO:0009733(response to auxin);GO:0009734(auxin-activated signaling pathway);GO:0035198(miRNA binding);GO:0048829(root cap development);GO:005130…	04075(Plant hormone signal transduction)	0.00462272
XM_016578083.1:1550	nta-miR160a	XM_016578083.1	107760064	LOC107760064	PREDICTED: auxin response factor 18-like isoform X2 [Nicotiana tabacum]	GO:0003677(DNA binding);GO:0003700(transcription factor activity, sequence-specific DNA binding);GO:0005634(nucleus);GO:0006351(transcription, DNA-templated);GO:0006355(regulation of transcription, DNA-templated);GO:0007389(pattern specification process);GO:0009734(auxin-activated signaling pathway);GO:0009738(abscisic acid-activated signaling pathway);GO:0009743(response to carbohydrate);GO:0010…	04075(Plant hormone signal transduction);04075(Plant hormone signal transduction)	0.00635072
XM_016616659.1:1718	nta-miR160a	XM_016616659.1	107794188	LOC107794188	PREDICTED: auxin response factor 18-like [Nicotiana tabacum]	GO:0003677(DNA binding);GO:0003700(transcription factor activity, sequence-specific DNA binding);GO:0005634(nucleus);GO:0006351(transcription, DNA-templated);GO:0006355(regulation of transcription, DNA-templated);GO:0007389(pattern specification process);GO:0009734(auxin-activated signaling pathway);GO:0009738(abscisic acid-activated signaling pathway);GO:0009743(response to carbohydrate);GO:0010…	04075(Plant hormone signal transduction);04075(Plant hormone signal transduction)	0.00663843
XM_016578084.1:1468	nta-miR160a	XM_016578084.1	107760064	LOC107760064	PREDICTED: auxin response factor 18-like isoform X2 [Nicotiana tabacum]	GO:0003677(DNA binding);GO:0003700(transcription factor activity, sequence-specific DNA binding);GO:0005634(nucleus);GO:0006351(transcription, DNA-templated);GO:0006355(regulation of transcription, DNA-templated);GO:0007389(pattern specification process);GO:0009734(auxin-activated signaling pathway);GO:0009738(abscisic acid-activated signaling pathway);GO:0009743(response to carbohydrate);GO:0010…	04075(Plant hormone signal transduction);04075(Plant hormone signal transduction)	0.00692606
XM_016578081.1:1555	nta-miR160a	XM_016578081.1	107760064	LOC107760064	PREDICTED: auxin response factor 18-like isoform X2 [Nicotiana tabacum]	GO:0003677(DNA binding);GO:0003700(transcription factor activity, sequence-specific DNA binding);GO:0005634(nucleus);GO:0006351(transcription, DNA-templated);GO:0006355(regulation of transcription, DNA-templated);GO:0007389(pattern specification process);GO:0009734(auxin-activated signaling pathway);GO:0009738(abscisic acid-activated signaling pathway);GO:0009743(response to carbohydrate);GO:0010…	04075(Plant hormone signal transduction);04075(Plant hormone signal transduction)	0.0072136
XM_016616657.1:1848	nta-miR160a	XM_016616657.1	107794188	LOC107794188	PREDICTED: auxin response factor 18-like [Nicotiana tabacum]	GO:0003677(DNA binding);GO:0003700(transcription factor activity, sequence-specific DNA binding);GO:0005634(nucleus);GO:0006351(transcription, DNA-templated);GO:0006355(regulation of transcription, DNA-templated);GO:0007389(pattern specification process);GO:0009734(auxin-activated signaling pathway);GO:0009738(abscisic acid-activated signaling pathway);GO:0009743(response to carbohydrate);GO:0010…	04075(Plant hormone signal transduction);04075(Plant hormone signal transduction)	0.00750106
XM_016616660.1:1609	nta-miR160a	XM_016616660.1	107794188	LOC107794188	PREDICTED: auxin response factor 18-like [Nicotiana tabacum]	GO:0003677(DNA binding);GO:0003700(transcription factor activity, sequence-specific DNA binding);GO:0005634(nucleus);GO:0006351(transcription, DNA-templated);GO:0006355(regulation of transcription, DNA-templated);GO:0007389(pattern specification process);GO:0009734(auxin-activated signaling pathway);GO:0009738(abscisic acid-activated signaling pathway);GO:0009743(response to carbohydrate);GO:0010…	04075(Plant hormone signal transduction);04075(Plant hormone signal transduction)	0.00836294
XM_016616661.1:1495	nta-miR160a	XM_016616661.1	107794188	LOC107794188	PREDICTED: auxin response factor 18-like [Nicotiana tabacum]	GO:0003677(DNA binding);GO:0003700(transcription factor activity, sequence-specific DNA binding);GO:0005634(nucleus);GO:0006351(transcription, DNA-templated);GO:0006355(regulation of transcription, DNA-templated);GO:0007389(pattern specification process);GO:0009734(auxin-activated signaling pathway);GO:0009738(abscisic acid-activated signaling pathway);GO:0009743(response to carbohydrate);GO:0010…	04075(Plant hormone signal transduction);04075(Plant hormone signal transduction)	0.00865007
XM_016616658.1:1762	nta-miR160a	XM_016616658.1	107794188	LOC107794188	PREDICTED: auxin response factor 18-like [Nicotiana tabacum]	GO:0003677(DNA binding);GO:0003700(transcription factor activity, sequence-specific DNA binding);GO:0005634(nucleus);GO:0006351(transcription, DNA-templated);GO:0006355(regulation of transcription, DNA-templated);GO:0007389(pattern specification process);GO:0009734(auxin-activated signaling pathway);GO:0009738(abscisic acid-activated signaling pathway);GO:0009743(response to carbohydrate);GO:0010…	04075(Plant hormone signal transduction);04075(Plant hormone signal transduction)	0.00893711
XM_016578085.1:1620	nta-miR160a	XM_016578085.1	107760064	LOC107760064	PREDICTED: auxin response factor 18-like isoform X2 [Nicotiana tabacum]	GO:0003677(DNA binding);GO:0003700(transcription factor activity, sequence-specific DNA binding);GO:0005634(nucleus);GO:0006351(transcription, DNA-templated);GO:0006355(regulation of transcription, DNA-templated);GO:0007389(pattern specification process);GO:0009734(auxin-activated signaling pathway);GO:0009738(abscisic acid-activated signaling pathway);GO:0009743(response to carbohydrate);GO:0010…	04075(Plant hormone signal transduction);04075(Plant hormone signal transduction)	0.00922407
XM_016578082.1:1508	nta-miR160a	XM_016578082.1	107760064	LOC107760064	PREDICTED: auxin response factor 18-like isoform X2 [Nicotiana tabacum]	GO:0003677(DNA binding);GO:0003700(transcription factor activity, sequence-specific DNA binding);GO:0005634(nucleus);GO:0006351(transcription, DNA-templated);GO:0006355(regulation of transcription, DNA-templated);GO:0007389(pattern specification process);GO:0009734(auxin-activated signaling pathway);GO:0009738(abscisic acid-activated signaling pathway);GO:0009743(response to carbohydrate);GO:0010…	04075(Plant hormone signal transduction);04075(Plant hormone signal transduction)	0.0114524
XM_016589684.1:355	nta-MIR160b-p3	XM_016589684.1	MSTRG.12546	LOC107770380	PREDICTED: clavaminate synthase-like protein At3g21360 [Nicotiana sylvestris]	GO:0005634(nucleus);GO:0016491(oxidoreductase activity);GO:0046872(metal ion binding);GO:0055114(oxidation-reduction process)	NA	0.0285437
MSTRG.14136.2:3311	nta-miR167d	MSTRG.14136.2	MSTRG.14136	LOC107774783	PREDICTED: auxin response factor 6-like isoform X3 [Nicotiana tomentosiformis]	GO:0003677(DNA binding);GO:0003700(transcription factor activity, sequence-specific DNA binding);GO:0005515(protein binding);GO:0005634(nucleus);GO:0006351(transcription, DNA-templated);GO:0006355(regulation of transcription, DNA-templated);GO:0009733(response to auxin);GO:0009734(auxin-activated signaling pathway);GO:0009908(flower development)	04075(Plant hormone signal transduction)	0.00318042
XM_016580372.1:2580	nta-miR167d	XM_016580372.1	MSTRG.9972	LOC107762058	PREDICTED: auxin response factor 6-like isoform X2 [Nicotiana tabacum]	GO:0003677(DNA binding);GO:0003700(transcription factor activity, sequence-specific DNA binding);GO:0005515(protein binding);GO:0005634(nucleus);GO:0006351(transcription, DNA-templated);GO:0006355(regulation of transcription, DNA-templated);GO:0009733(response to auxin);GO:0009734(auxin-activated signaling pathway);GO:0009908(flower development);GO:0009908(flower development)	04075(Plant hormone signal transduction);04075(Plant hormone signal transduction)	0.00346905
XM_016594427.1:3113	nta-miR167d	XM_016594427.1	MSTRG.14136	LOC107774783	PREDICTED: auxin response factor 6-like isoform X3 [Nicotiana tomentosiformis]	GO:0003677(DNA binding);GO:0003700(transcription factor activity, sequence-specific DNA binding);GO:0005515(protein binding);GO:0005634(nucleus);GO:0006351(transcription, DNA-templated);GO:0006355(regulation of transcription, DNA-templated);GO:0009733(response to auxin);GO:0009734(auxin-activated signaling pathway);GO:0009908(flower development)	04075(Plant hormone signal transduction)	0.00404605
XM_016580371.1:2583	nta-miR167d	XM_016580371.1	MSTRG.9972	LOC107762058	PREDICTED: auxin response factor 6-like isoform X2 [Nicotiana tabacum]	GO:0003677(DNA binding);GO:0003700(transcription factor activity, sequence-specific DNA binding);GO:0005515(protein binding);GO:0005634(nucleus);GO:0006351(transcription, DNA-templated);GO:0006355(regulation of transcription, DNA-templated);GO:0009733(response to auxin);GO:0009734(auxin-activated signaling pathway);GO:0009908(flower development);GO:0009908(flower development)	04075(Plant hormone signal transduction);04075(Plant hormone signal transduction)	0.00462272
XM_016609388.1:2300	nta-miR167d	XM_016609388.1	MSTRG.18251	LOC107787782	PREDICTED: auxin response factor 8-like [Nicotiana sylvestris]	GO:0003677(DNA binding);GO:0003700(transcription factor activity, sequence-specific DNA binding);GO:0005634(nucleus);GO:0006351(transcription, DNA-templated);GO:0006355(regulation of transcription, DNA-templated);GO:0009733(response to auxin);GO:0009734(auxin-activated signaling pathway);GO:0009908(flower development)	04075(Plant hormone signal transduction)	0.00519905
XM_016639982.1:2897	nta-miR167d	XM_016639982.1	107814545	LOC107814545	PREDICTED: auxin response factor 8-like [Nicotiana tabacum]	GO:0003677(DNA binding);GO:0003700(transcription factor activity, sequence-specific DNA binding);GO:0005634(nucleus);GO:0006351(transcription, DNA-templated);GO:0006355(regulation of transcription, DNA-templated);GO:0009733(response to auxin);GO:0009734(auxin-activated signaling pathway);GO:0009908(flower development)	04075(Plant hormone signal transduction)	0.0054871
XM_016637923.1:3061	nta-miR167d	XM_016637923.1	MSTRG.26046	LOC107812758	PREDICTED: auxin response factor 8-like isoform X2 [Nicotiana tabacum]	GO:0003677(DNA binding);GO:0003700(transcription factor activity, sequence-specific DNA binding);GO:0005634(nucleus);GO:0006351(transcription, DNA-templated);GO:0006355(regulation of transcription, DNA-templated);GO:0009733(response to auxin);GO:0009734(auxin-activated signaling pathway);GO:0009908(flower development);GO:0009908(flower development)	04075(Plant hormone signal transduction);04075(Plant hormone signal transduction)	0.00577506
XM_016637925.1:2956	nta-miR167d	XM_016637925.1	MSTRG.26046	LOC107812758	PREDICTED: auxin response factor 8-like isoform X2 [Nicotiana tabacum]	GO:0003677(DNA binding);GO:0003700(transcription factor activity, sequence-specific DNA binding);GO:0005634(nucleus);GO:0006351(transcription, DNA-templated);GO:0006355(regulation of transcription, DNA-templated);GO:0009733(response to auxin);GO:0009734(auxin-activated signaling pathway);GO:0009908(flower development);GO:0009908(flower development)	04075(Plant hormone signal transduction);04075(Plant hormone signal transduction)	0.00606293
XM_016637924.1:3053	nta-miR167d	XM_016637924.1	MSTRG.26046	LOC107812758	PREDICTED: auxin response factor 8-like isoform X2 [Nicotiana tabacum]	GO:0003677(DNA binding);GO:0003700(transcription factor activity, sequence-specific DNA binding);GO:0005634(nucleus);GO:0006351(transcription, DNA-templated);GO:0006355(regulation of transcription, DNA-templated);GO:0009733(response to auxin);GO:0009734(auxin-activated signaling pathway);GO:0009908(flower development);GO:0009908(flower development)	04075(Plant hormone signal transduction);04075(Plant hormone signal transduction)	0.00663843
XM_016657318.1:1741	nta-miR167d	XM_016657318.1	MSTRG.8049	LOC107829853	PREDICTED: auxin response factor 8-like [Nicotiana tabacum]	GO:0003677(DNA binding);GO:0003700(transcription factor activity, sequence-specific DNA binding);GO:0005634(nucleus);GO:0006351(transcription, DNA-templated);GO:0006355(regulation of transcription, DNA-templated);GO:0009733(response to auxin);GO:0009734(auxin-activated signaling pathway);GO:0009908(flower development)	04075(Plant hormone signal transduction)	0.0072136
XM_016616527.1:1308	nta-miR167d	XM_016616527.1	107794072	LOC107794072	PREDICTED: MATE efflux family protein 5-like [Nicotiana sylvestris]	GO:0006855(drug transmembrane transport);GO:0015238(drug transmembrane transporter activity)	NA	0.0130777
XM_016604664.1:320	nta-MIR6163-p3	XM_016604664.1	MSTRG.16980	LOC107783659	PREDICTED: rRNA biogenesis protein RRP5-like [Nicotiana tomentosiformis]	GO:0003723(RNA binding);GO:0005730(nucleolus);GO:0032040(small-subunit processome)	NA	0.0219914
XM_016581150.1:813	nta-miR164c	XM_016581150.1	MSTRG.1024	LOC107762763	PREDICTED: NAC domain-containing protein 21/22-like [Nicotiana tabacum]	GO:0003677(DNA binding);GO:0003700(transcription factor activity, sequence-specific DNA binding);GO:0005634(nucleus);GO:0006351(transcription, DNA-templated);GO:0006355(regulation of transcription, DNA-templated);GO:0007275(multicellular organism development);GO:0009734(auxin-activated signaling pathway);GO:0010072(primary shoot apical meristem specification);GO:0048527(lateral root development)	03018(RNA degradation)	0.000579012
XM_016584328.1:925	nta-miR164a	XM_016584328.1	107765662	LOC107765662	PREDICTED: NAC domain-containing protein 100 isoform X1 [Nicotiana sylvestris]	GO:0003677(DNA binding);GO:0003700(transcription factor activity, sequence-specific DNA binding);GO:0005634(nucleus);GO:0006351(transcription, DNA-templated);GO:0006355(regulation of transcription, DNA-templated);GO:0007275(multicellular organism development);GO:0007275(multicellular organism development)	03018(RNA degradation);03018(RNA degradation)	0.00404605
XM_016611152.1:990	nta-miR164a	XM_016611152.1	107789352	LOC107789352	PREDICTED: NAC domain-containing protein 100-like [Nicotiana tabacum]	GO:0003677(DNA binding);GO:0003700(transcription factor activity, sequence-specific DNA binding);GO:0005634(nucleus);GO:0006351(transcription, DNA-templated);GO:0006355(regulation of transcription, DNA-templated);GO:0007275(multicellular organism development)	03018(RNA degradation)	0.00462272
XM_016605063.1:792	nta-miR164c	XM_016605063.1	107784013	LOC107784013	PREDICTED: NAC domain-containing protein 21/22-like isoform X2 [Nicotiana tomentosiformis]	GO:0003677(DNA binding);GO:0003700(transcription factor activity, sequence-specific DNA binding);GO:0005634(nucleus);GO:0006351(transcription, DNA-templated);GO:0006355(regulation of transcription, DNA-templated);GO:0007275(multicellular organism development);GO:0009734(auxin-activated signaling pathway);GO:0010072(primary shoot apical meristem specification);GO:0048527(lateral root development);…	03018(RNA degradation);03018(RNA degradation)	0.012713
XM_016578619.1:1549	nta-miR166a	XM_016578619.1	107760551	LOC107760551	PREDICTED: homeobox-leucine zipper protein ATHB-15-like isoform X1 [Nicotiana tabacum]	GO:0003677(DNA binding);GO:0003700(transcription factor activity, sequence-specific DNA binding);GO:0005634(nucleus);GO:0006351(transcription, DNA-templated);GO:0006355(regulation of transcription, DNA-templated);GO:0008289(lipid binding);GO:0009855(determination of bilateral symmetry);GO:0009887(organ morphogenesis);GO:0009965(leaf morphogenesis);GO:0010014(meristem initiation);GO:0010073(merist…	NA	0.000289548
XM_016603592.1:1500	nta-miR166a	XM_016603592.1	107782674	LOC107782674	PREDICTED: homeobox-leucine zipper protein ATHB-15-like isoform X1 [Nicotiana tomentosiformis]	GO:0003677(DNA binding);GO:0003700(transcription factor activity, sequence-specific DNA binding);GO:0005634(nucleus);GO:0006351(transcription, DNA-templated);GO:0006355(regulation of transcription, DNA-templated);GO:0008289(lipid binding);GO:0009855(determination of bilateral symmetry);GO:0009887(organ morphogenesis);GO:0009965(leaf morphogenesis);GO:0010014(meristem initiation);GO:0010073(merist…	NA	0.000579012
XM_016643130.1:1546	nta-miR166a	XM_016643130.1	107817328	LOC107817328	PREDICTED: homeobox-leucine zipper protein ATHB-15-like [Nicotiana tabacum]	GO:0003677(DNA binding);GO:0003700(transcription factor activity, sequence-specific DNA binding);GO:0005634(nucleus);GO:0006351(transcription, DNA-templated);GO:0006355(regulation of transcription, DNA-templated);GO:0008289(lipid binding);GO:0009855(determination of bilateral symmetry);GO:0009887(organ morphogenesis);GO:0009965(leaf morphogenesis);GO:0010014(meristem initiation);GO:0010073(merist…	NA	0.000868392
XM_016578617.1:1549	nta-miR166a	XM_016578617.1	107760551	LOC107760551	PREDICTED: homeobox-leucine zipper protein ATHB-15-like isoform X1 [Nicotiana tabacum]	GO:0003677(DNA binding);GO:0003700(transcription factor activity, sequence-specific DNA binding);GO:0005634(nucleus);GO:0006351(transcription, DNA-templated);GO:0006355(regulation of transcription, DNA-templated);GO:0008289(lipid binding);GO:0009855(determination of bilateral symmetry);GO:0009887(organ morphogenesis);GO:0009965(leaf morphogenesis);GO:0010014(meristem initiation);GO:0010073(merist…	NA	0.00115769
XM_016657470.1:1526	nta-miR166a	XM_016657470.1	107829997	LOC107829997	PREDICTED: homeobox-leucine zipper protein ATHB-15-like [Nicotiana sylvestris]	GO:0003677(DNA binding);GO:0003700(transcription factor activity, sequence-specific DNA binding);GO:0005634(nucleus);GO:0006351(transcription, DNA-templated);GO:0006355(regulation of transcription, DNA-templated);GO:0008289(lipid binding);GO:0009855(determination of bilateral symmetry);GO:0009887(organ morphogenesis);GO:0009965(leaf morphogenesis);GO:0010014(meristem initiation);GO:0010073(merist…	NA	0.0014469
XM_016578618.1:1448	nta-miR166a	XM_016578618.1	107760551	LOC107760551	PREDICTED: homeobox-leucine zipper protein ATHB-15-like isoform X1 [Nicotiana tabacum]	GO:0003677(DNA binding);GO:0003700(transcription factor activity, sequence-specific DNA binding);GO:0005634(nucleus);GO:0006351(transcription, DNA-templated);GO:0006355(regulation of transcription, DNA-templated);GO:0008289(lipid binding);GO:0009855(determination of bilateral symmetry);GO:0009887(organ morphogenesis);GO:0009965(leaf morphogenesis);GO:0010014(meristem initiation);GO:0010073(merist…	NA	0.00173603
XM_016603593.1:1462	nta-miR166a	XM_016603593.1	107782674	LOC107782674	PREDICTED: homeobox-leucine zipper protein ATHB-15-like isoform X1 [Nicotiana tomentosiformis]	GO:0003677(DNA binding);GO:0003700(transcription factor activity, sequence-specific DNA binding);GO:0005634(nucleus);GO:0006351(transcription, DNA-templated);GO:0006355(regulation of transcription, DNA-templated);GO:0008289(lipid binding);GO:0009855(determination of bilateral symmetry);GO:0009887(organ morphogenesis);GO:0009965(leaf morphogenesis);GO:0010014(meristem initiation);GO:0010073(merist…	NA	0.00202508
XM_016649481.1:1067	nta-miR166a	XM_016649481.1	MSTRG.5736	LOC107822894	PREDICTED: homeobox-leucine zipper protein REVOLUTA-like [Nicotiana tabacum]	GO:0003677(DNA binding);GO:0003700(transcription factor activity, sequence-specific DNA binding);GO:0005634(nucleus);GO:0006351(transcription, DNA-templated);GO:0006355(regulation of transcription, DNA-templated);GO:0008289(lipid binding);GO:0009855(determination of bilateral symmetry);GO:0009944(polarity specification of adaxial/abaxial axis);GO:0009956(radial pattern formation);GO:0010014(meris…	NA	0.00231404
XM_016649482.1:738	nta-miR166a	XM_016649482.1	MSTRG.5736	LOC107822894	PREDICTED: homeobox-leucine zipper protein REVOLUTA-like [Nicotiana tabacum]	GO:0003677(DNA binding);GO:0003700(transcription factor activity, sequence-specific DNA binding);GO:0005634(nucleus);GO:0006351(transcription, DNA-templated);GO:0006355(regulation of transcription, DNA-templated);GO:0008289(lipid binding);GO:0009855(determination of bilateral symmetry);GO:0009944(polarity specification of adaxial/abaxial axis);GO:0009956(radial pattern formation);GO:0010014(meris…	NA	0.00260291
XM_016616723.1:1692	nta-miR166a	XM_016616723.1	MSTRG.20326	LOC107794244	PREDICTED: homeobox-leucine zipper protein REVOLUTA-like [Nicotiana tabacum]	GO:0003677(DNA binding);GO:0003700(transcription factor activity, sequence-specific DNA binding);GO:0005634(nucleus);GO:0006351(transcription, DNA-templated);GO:0006355(regulation of transcription, DNA-templated);GO:0008289(lipid binding);GO:0009855(determination of bilateral symmetry);GO:0009944(polarity specification of adaxial/abaxial axis);GO:0009956(radial pattern formation);GO:0010014(meris…	NA	0.00346905
XM_016587224.1:993	nta-miR166a	XM_016587224.1	107768119	LOC107768119	PREDICTED: homeobox-leucine zipper protein ATHB-15-like [Nicotiana tomentosiformis]	GO:0003677(DNA binding);GO:0003700(transcription factor activity, sequence-specific DNA binding);GO:0005634(nucleus);GO:0006351(transcription, DNA-templated);GO:0006355(regulation of transcription, DNA-templated);GO:0008289(lipid binding);GO:0009855(determination of bilateral symmetry);GO:0009887(organ morphogenesis);GO:0009965(leaf morphogenesis);GO:0010014(meristem initiation);GO:0010073(merist…	NA	0.00410528
XM_016646177.1:1402	nta-miR166a	XM_016646177.1	MSTRG.4815	LOC107819982	PREDICTED: homeobox-leucine zipper protein ATHB-14-like isoform X2 [Nicotiana tomentosiformis]	GO:0003677(DNA binding);GO:0003700(transcription factor activity, sequence-specific DNA binding);GO:0005634(nucleus);GO:0006351(transcription, DNA-templated);GO:0006355(regulation of transcription, DNA-templated);GO:0008289(lipid binding);GO:0009855(determination of bilateral symmetry);GO:0009944(polarity specification of adaxial/abaxial axis);GO:0009955(adaxial/abaxial pattern specification);GO:…	NA	0.0061516
XM_016647822.1:1367	nta-miR166a	XM_016647822.1	MSTRG.5270	LOC107821381	homeobox-leucine zipper protein ATHB-14-like [Nicotiana sylvestris]	GO:0003677(DNA binding);GO:0003700(transcription factor activity, sequence-specific DNA binding);GO:0005634(nucleus);GO:0006351(transcription, DNA-templated);GO:0006355(regulation of transcription, DNA-templated);GO:0008289(lipid binding);GO:0009855(determination of bilateral symmetry);GO:0009944(polarity specification of adaxial/abaxial axis);GO:0009955(adaxial/abaxial pattern specification);GO:…	NA	0.00656035
XM_016589183.1:372	nta-MIR166g-p5_1ss19TA	XM_016589183.1	107769925	LOC107769925	PREDICTED: uncharacterized protein LOC107769925 [Nicotiana tabacum]	GO:0000209(protein polyubiquitination);GO:0042787(protein ubiquitination involved in ubiquitin-dependent protein catabolic process);GO:0043161(proteasome-mediated ubiquitin-dependent protein catabolic process);GO:0061630(ubiquitin protein ligase activity)	03013(RNA transport)	0.0149459
XM_016612746.1:527	nta-miR168d	XM_016612746.1	MSTRG.19192	LOC107790785	PREDICTED: protein argonaute 1-like isoform X2 [Nicotiana tabacum]	GO:0005515(protein binding);GO:0005515(protein binding)	NA	0.000289548
XM_016612747.1:527	nta-miR168a	XM_016612747.1	#N/A	#N/A	#N/A	#N/A	#N/A	0.000579012
XM_016630482.1:527	nta-miR168a	XM_016630482.1	MSTRG.24089	LOC107806342	PREDICTED: protein argonaute 1-like isoform X1 [Nicotiana tabacum]	GO:0005515(protein binding);GO:0005515(protein binding)	NA	0.000868392
XM_016630483.1:527	nta-miR168d	XM_016630483.1	MSTRG.24089	LOC107806342	PREDICTED: protein argonaute 1-like isoform X1 [Nicotiana tabacum]	GO:0005515(protein binding);GO:0005515(protein binding)	NA	0.00115769
XM_016612745.1:527	nta-miR168d	XM_016612745.1	MSTRG.19192	LOC107790785	PREDICTED: protein argonaute 1-like isoform X2 [Nicotiana tabacum]	GO:0005515(protein binding);GO:0005515(protein binding)	NA	0.0014469
XM_016630480.1:527	nta-miR168a	XM_016630480.1	MSTRG.24089	LOC107806342	PREDICTED: protein argonaute 1-like isoform X1 [Nicotiana tabacum]	GO:0005515(protein binding);GO:0005515(protein binding)	NA	0.00173603
XM_016590746.1:576	nta-miR168d	XM_016590746.1	MSTRG.12855	LOC107771391	PREDICTED: protein argonaute 1-like [Nicotiana tabacum]	GO:0005515(protein binding)	NA	0.00231404
XM_016611294.1:649	nta-miR168a	XM_016611294.1	#N/A	#N/A	#N/A	#N/A	#N/A	0.00287547
XM_016644129.1:541	nta-miR168d	XM_016644129.1	MSTRG.4248	LOC107818184	PREDICTED: probable calcium-binding protein CML36 [Nicotiana tomentosiformis]	GO:0005509(calcium ion binding);GO:0005515(protein binding);GO:0005886(plasma membrane);GO:0050832(defense response to fungus)	04626(Plant-pathogen interaction)	0.00491093
XM_016618037.1:1379	nta-miR169a_1ss7AG	XM_016618037.1	MSTRG.20705	LOC107795403	PREDICTED: nuclear transcription factor Y subunit A-3-like [Nicotiana tabacum]	GO:0003677(DNA binding);GO:0003700(transcription factor activity, sequence-specific DNA binding);GO:0005634(nucleus);GO:0006351(transcription, DNA-templated);GO:0006355(regulation of transcription, DNA-templated);GO:0016602(CCAAT-binding factor complex);GO:0016602(CCAAT-binding factor complex)	00970(Aminoacyl-tRNA biosynthesis);00970(Aminoacyl-tRNA biosynthesis)	0.000868392
XM_016618038.1:2283	nta-miR169a_1ss7AG	XM_016618038.1	MSTRG.20705	LOC107795403	PREDICTED: nuclear transcription factor Y subunit A-3-like [Nicotiana tabacum]	GO:0003677(DNA binding);GO:0003700(transcription factor activity, sequence-specific DNA binding);GO:0005634(nucleus);GO:0006351(transcription, DNA-templated);GO:0006355(regulation of transcription, DNA-templated);GO:0016602(CCAAT-binding factor complex);GO:0016602(CCAAT-binding factor complex)	00970(Aminoacyl-tRNA biosynthesis);00970(Aminoacyl-tRNA biosynthesis)	0.0014469
XM_016633965.1:1019	nta-miR169q_R-1_1ss7AG	XM_016633965.1	MSTRG.25029	LOC107809359	PREDICTED: nuclear transcription factor Y subunit A-7-like [Nicotiana tabacum]	GO:0003677(DNA binding);GO:0003700(transcription factor activity, sequence-specific DNA binding);GO:0005634(nucleus);GO:0006351(transcription, DNA-templated);GO:0006355(regulation of transcription, DNA-templated);GO:0016602(CCAAT-binding factor complex);GO:0016602(CCAAT-binding factor complex)	00970(Aminoacyl-tRNA biosynthesis);00970(Aminoacyl-tRNA biosynthesis)	0.00836294
XM_016633962.1:1075	nta-miR169q_R-1_1ss7AG	XM_016633962.1	MSTRG.25029	LOC107809359	PREDICTED: nuclear transcription factor Y subunit A-7-like [Nicotiana tabacum]	GO:0003677(DNA binding);GO:0003700(transcription factor activity, sequence-specific DNA binding);GO:0005634(nucleus);GO:0006351(transcription, DNA-templated);GO:0006355(regulation of transcription, DNA-templated);GO:0016602(CCAAT-binding factor complex);GO:0016602(CCAAT-binding factor complex)	00970(Aminoacyl-tRNA biosynthesis);00970(Aminoacyl-tRNA biosynthesis)	0.0110456
XM_016608085.1:1919	nta-miR169a_1ss7AG	XM_016608085.1	107786581	LOC107786581	PREDICTED: uncharacterized protein LOC107786581 isoform X2 [Nicotiana tabacum]	GO:0016787(hydrolase activity);GO:0016787(hydrolase activity)	NA	0.0126611
XM_016609233.1:3154	nta-miR169t_R-1_1ss8GT	XM_016609233.1	MSTRG.18214	LOC107787638	PREDICTED: ABC transporter C family member 14-like [Nicotiana tabacum]	GO:0000325(plant-type vacuole);GO:0005524(ATP binding);GO:0005773(vacuole);GO:0005774(vacuolar membrane);GO:0005794(Golgi apparatus);GO:0005886(plasma membrane);GO:0008559(xenobiotic-transporting ATPase activity);GO:0016021(integral component of membrane);GO:0042626(ATPase activity, coupled to transmembrane movement of substances);GO:0042626(ATPase activity, coupled to transmembrane movement of s…	02010(ABC transporters);02010(ABC transporters)	0.0219914
XM_016660176.1:1120	nta-miR169a_1ss7AG	XM_016660176.1	MSTRG.8795	LOC107832352	PREDICTED: nuclear transcription factor Y subunit A-1-like [Nicotiana tabacum]	GO:0003677(DNA binding);GO:0003700(transcription factor activity, sequence-specific DNA binding);GO:0005634(nucleus);GO:0006351(transcription, DNA-templated);GO:0006355(regulation of transcription, DNA-templated);GO:0009793(embryo development ending in seed dormancy);GO:0010262(somatic embryogenesis);GO:0016602(CCAAT-binding factor complex);GO:0048316(seed development);GO:0048510(regulation of ti…	00970(Aminoacyl-tRNA biosynthesis);00970(Aminoacyl-tRNA biosynthesis)	0.0268543
XM_016660175.1:1235	nta-miR169a_1ss7AG	XM_016660175.1	MSTRG.8795	LOC107832352	PREDICTED: nuclear transcription factor Y subunit A-1-like [Nicotiana tabacum]	GO:0003677(DNA binding);GO:0003700(transcription factor activity, sequence-specific DNA binding);GO:0005634(nucleus);GO:0006351(transcription, DNA-templated);GO:0006355(regulation of transcription, DNA-templated);GO:0009793(embryo development ending in seed dormancy);GO:0010262(somatic embryogenesis);GO:0016602(CCAAT-binding factor complex);GO:0048316(seed development);GO:0048510(regulation of ti…	00970(Aminoacyl-tRNA biosynthesis);00970(Aminoacyl-tRNA biosynthesis)	0.0274177
XM_016614321.1:1226	nta-miR169a_1ss7AG	XM_016614321.1	MSTRG.19622	LOC107792129	PREDICTED: nuclear transcription factor Y subunit A-1-like [Nicotiana sylvestris]	GO:0003677(DNA binding);GO:0003700(transcription factor activity, sequence-specific DNA binding);GO:0005634(nucleus);GO:0006351(transcription, DNA-templated);GO:0006355(regulation of transcription, DNA-templated);GO:0009793(embryo development ending in seed dormancy);GO:0010262(somatic embryogenesis);GO:0016602(CCAAT-binding factor complex);GO:0048316(seed development);GO:0048510(regulation of ti…	00970(Aminoacyl-tRNA biosynthesis)	0.0276994
XM_016600705.1:1446	nta-miR169a_1ss7AG	XM_016600705.1	MSTRG.15841	LOC107780177	PREDICTED: nuclear transcription factor Y subunit A-3-like isoform X1 [Nicotiana tabacum]	GO:0003677(DNA binding);GO:0003700(transcription factor activity, sequence-specific DNA binding);GO:0005634(nucleus);GO:0006351(transcription, DNA-templated);GO:0006355(regulation of transcription, DNA-templated);GO:0016602(CCAAT-binding factor complex);GO:0016602(CCAAT-binding factor complex)	00970(Aminoacyl-tRNA biosynthesis);00970(Aminoacyl-tRNA biosynthesis)	0.0498907
XM_016582024.1:1066	nta-miR171b	XM_016582024.1	107763537	LOC107763537	PREDICTED: scarecrow-like protein 6 isoform X1 [Nicotiana tabacum]	GO:0003700(transcription factor activity, sequence-specific DNA binding);GO:0005634(nucleus);GO:0006355(regulation of transcription, DNA-templated);GO:0030154(cell differentiation);GO:0043565(sequence-specific DNA binding);GO:0043565(sequence-specific DNA binding)	04075(Plant hormone signal transduction);04075(Plant hormone signal transduction)	0.000289548
XM_016631827.1:1384	nta-miR171b	XM_016631827.1	MSTRG.24455	LOC107807449	PREDICTED: scarecrow-like protein 22 [Nicotiana tabacum]	GO:0003700(transcription factor activity, sequence-specific DNA binding);GO:0005634(nucleus);GO:0006355(regulation of transcription, DNA-templated);GO:0030154(cell differentiation);GO:0043565(sequence-specific DNA binding)	04075(Plant hormone signal transduction)	0.000579012
XM_016631828.1:1234	nta-miR171b	XM_016631828.1	107807450	LOC107807450	PREDICTED: scarecrow-like protein 6 [Nicotiana tabacum]	GO:0003700(transcription factor activity, sequence-specific DNA binding);GO:0005634(nucleus);GO:0006355(regulation of transcription, DNA-templated);GO:0030154(cell differentiation);GO:0043565(sequence-specific DNA binding)	04075(Plant hormone signal transduction)	0.00115769
XR_001643055.1:1237	nta-miR171c	XR_001643055.1	#N/A	#N/A	#N/A	#N/A	#N/A	0.00115769
XM_016582022.1:1311	nta-miR171b	XM_016582022.1	107763536	LOC107763536	PREDICTED: scarecrow-like protein 6 isoform X2 [Nicotiana tabacum]	GO:0003700(transcription factor activity, sequence-specific DNA binding);GO:0005634(nucleus);GO:0006355(regulation of transcription, DNA-templated);GO:0030154(cell differentiation);GO:0043565(sequence-specific DNA binding);GO:0043565(sequence-specific DNA binding)	04075(Plant hormone signal transduction);04075(Plant hormone signal transduction)	0.00123336
XR_001643051.1:1234	nta-miR171b	XR_001643051.1	107763537	LOC107763537	PREDICTED: scarecrow-like protein 6 isoform X1 [Nicotiana tabacum]	GO:0003700(transcription factor activity, sequence-specific DNA binding);GO:0005634(nucleus);GO:0006355(regulation of transcription, DNA-templated);GO:0030154(cell differentiation);GO:0043565(sequence-specific DNA binding);GO:0043565(sequence-specific DNA binding)	04075(Plant hormone signal transduction);04075(Plant hormone signal transduction)	0.0014469
MSTRG.24455.2:1436	nta-miR171c	MSTRG.24455.2	MSTRG.24455	LOC107807449	PREDICTED: scarecrow-like protein 22 [Nicotiana tabacum]	GO:0003700(transcription factor activity, sequence-specific DNA binding);GO:0005634(nucleus);GO:0006355(regulation of transcription, DNA-templated);GO:0030154(cell differentiation);GO:0043565(sequence-specific DNA binding)	04075(Plant hormone signal transduction)	0.00173603
XM_016582020.1:1395	nta-miR171b	XM_016582020.1	107763536	LOC107763536	PREDICTED: scarecrow-like protein 6 isoform X2 [Nicotiana tabacum]	GO:0003700(transcription factor activity, sequence-specific DNA binding);GO:0005634(nucleus);GO:0006355(regulation of transcription, DNA-templated);GO:0030154(cell differentiation);GO:0043565(sequence-specific DNA binding);GO:0043565(sequence-specific DNA binding)	04075(Plant hormone signal transduction);04075(Plant hormone signal transduction)	0.00202508
XR_001643053.1:1234	nta-miR171b	XR_001643053.1	107763537	LOC107763537	PREDICTED: scarecrow-like protein 6 isoform X1 [Nicotiana tabacum]	GO:0003700(transcription factor activity, sequence-specific DNA binding);GO:0005634(nucleus);GO:0006355(regulation of transcription, DNA-templated);GO:0030154(cell differentiation);GO:0043565(sequence-specific DNA binding);GO:0043565(sequence-specific DNA binding)	04075(Plant hormone signal transduction);04075(Plant hormone signal transduction)	0.00289171
XM_016582023.1:1234	nta-miR171b	XM_016582023.1	107763537	LOC107763537	PREDICTED: scarecrow-like protein 6 isoform X1 [Nicotiana tabacum]	GO:0003700(transcription factor activity, sequence-specific DNA binding);GO:0005634(nucleus);GO:0006355(regulation of transcription, DNA-templated);GO:0030154(cell differentiation);GO:0043565(sequence-specific DNA binding);GO:0043565(sequence-specific DNA binding)	04075(Plant hormone signal transduction);04075(Plant hormone signal transduction)	0.00318042
XM_016582022.1:1314	nta-miR171c	XM_016582022.1	107763536	LOC107763536	PREDICTED: scarecrow-like protein 6 isoform X2 [Nicotiana tabacum]	GO:0003700(transcription factor activity, sequence-specific DNA binding);GO:0005634(nucleus);GO:0006355(regulation of transcription, DNA-templated);GO:0030154(cell differentiation);GO:0043565(sequence-specific DNA binding);GO:0043565(sequence-specific DNA binding)	04075(Plant hormone signal transduction);04075(Plant hormone signal transduction)	0.00328557
XR_001643054.1:1234	nta-miR171b	XR_001643054.1	#N/A	#N/A	#N/A	#N/A	#N/A	0.00328557
XR_001643052.1:1234	nta-miR171b	XR_001643052.1	107763537	LOC107763537	PREDICTED: scarecrow-like protein 6 isoform X1 [Nicotiana tabacum]	GO:0003700(transcription factor activity, sequence-specific DNA binding);GO:0005634(nucleus);GO:0006355(regulation of transcription, DNA-templated);GO:0030154(cell differentiation);GO:0043565(sequence-specific DNA binding);GO:0043565(sequence-specific DNA binding)	04075(Plant hormone signal transduction);04075(Plant hormone signal transduction)	0.00369551
MSTRG.22803.1:1744	nta-miR171b	MSTRG.22803.1	MSTRG.22803	LOC107802311	0	NA	NA	0.00375759
XM_016625781.1:1718	nta-miR171b	XM_016625781.1	#N/A	#N/A	#N/A	#N/A	#N/A	0.00404605
XM_016635528.1:1694	nta-miR171b	XM_016635528.1	107810717	LOC107810717	PREDICTED: scarecrow-like protein 22 [Nicotiana tabacum]	GO:0003700(transcription factor activity, sequence-specific DNA binding);GO:0005634(nucleus);GO:0006355(regulation of transcription, DNA-templated);GO:0010492(maintenance of shoot apical meristem identity);GO:0043565(sequence-specific DNA binding);GO:0048768(root hair cell tip growth);GO:0051301(cell division)	04075(Plant hormone signal transduction)	0.00433443
XM_016625782.1:1708	nta-miR171b	XM_016625782.1	#N/A	#N/A	#N/A	#N/A	#N/A	0.00462272
XM_016577663.1:893	nta-miR171c	XM_016577663.1	MSTRG.9198	LOC107759671	PREDICTED: scarecrow-like protein 15 [Nicotiana tabacum]	GO:0003700(transcription factor activity, sequence-specific DNA binding);GO:0005634(nucleus);GO:0006355(regulation of transcription, DNA-templated);GO:0030154(cell differentiation);GO:0043565(sequence-specific DNA binding);GO:0048831(regulation of shoot system development)	04075(Plant hormone signal transduction)	0.00491093
XM_016584434.1:740	nta-miR171b	XM_016584434.1	107765749	LOC107765749	PREDICTED: nodulation-signaling pathway 2 protein-like [Nicotiana tabacum]	GO:0003700(transcription factor activity, sequence-specific DNA binding);GO:0005634(nucleus);GO:0006355(regulation of transcription, DNA-templated);GO:0043565(sequence-specific DNA binding)	04075(Plant hormone signal transduction)	0.00491093
XR_001643054.1:1237	nta-miR171c	XR_001643054.1	#N/A	#N/A	#N/A	#N/A	#N/A	0.00492431
XR_001643052.1:1237	nta-miR171c	XR_001643052.1	107763537	LOC107763537	PREDICTED: scarecrow-like protein 6 isoform X1 [Nicotiana tabacum]	GO:0003700(transcription factor activity, sequence-specific DNA binding);GO:0005634(nucleus);GO:0006355(regulation of transcription, DNA-templated);GO:0030154(cell differentiation);GO:0043565(sequence-specific DNA binding);GO:0043565(sequence-specific DNA binding)	04075(Plant hormone signal transduction);04075(Plant hormone signal transduction)	0.00533358
XM_016625782.1:1711	nta-miR171c	XM_016625782.1	#N/A	#N/A	#N/A	#N/A	#N/A	0.012713
XM_016582023.1:1237	nta-miR171c	XM_016582023.1	107763537	LOC107763537	PREDICTED: scarecrow-like protein 6 isoform X1 [Nicotiana tabacum]	GO:0003700(transcription factor activity, sequence-specific DNA binding);GO:0005634(nucleus);GO:0006355(regulation of transcription, DNA-templated);GO:0030154(cell differentiation);GO:0043565(sequence-specific DNA binding);GO:0043565(sequence-specific DNA binding)	04075(Plant hormone signal transduction);04075(Plant hormone signal transduction)	0.0252645
XM_016635528.1:1697	nta-miR171c	XM_016635528.1	107810717	LOC107810717	PREDICTED: scarecrow-like protein 22 [Nicotiana tabacum]	GO:0003700(transcription factor activity, sequence-specific DNA binding);GO:0005634(nucleus);GO:0006355(regulation of transcription, DNA-templated);GO:0010492(maintenance of shoot apical meristem identity);GO:0043565(sequence-specific DNA binding);GO:0048768(root hair cell tip growth);GO:0051301(cell division)	04075(Plant hormone signal transduction)	0.0376563
MSTRG.3125.3:2731	nta-miR172a_R-1	MSTRG.3125.3	MSTRG.3125	LOC107814784	PREDICTED: ethylene-responsive transcription factor RAP2-7-like isoform X2 [Nicotiana tabacum]	GO:0003677(DNA binding);GO:0003700(transcription factor activity, sequence-specific DNA binding);GO:0005634(nucleus);GO:0006351(transcription, DNA-templated);GO:0006355(regulation of transcription, DNA-templated);GO:0009908(flower development);GO:0010073(meristem maintenance);GO:0010093(specification of floral organ identity);GO:0019953(sexual reproduction);GO:0030154(cell differentiation);GO:004…	04075(Plant hormone signal transduction);04075(Plant hormone signal transduction)	0.000579012
XM_016627031.1:1429	nta-miR172a_R-1	XM_016627031.1	107803338	LOC107803338	PREDICTED: ethylene-responsive transcription factor RAP2-7-like isoform X2 [Nicotiana tabacum]	GO:0003677(DNA binding);GO:0003700(transcription factor activity, sequence-specific DNA binding);GO:0005634(nucleus);GO:0006351(transcription, DNA-templated);GO:0006355(regulation of transcription, DNA-templated);GO:0009908(flower development);GO:0010073(meristem maintenance);GO:0010093(specification of floral organ identity);GO:0019953(sexual reproduction);GO:0030154(cell differentiation);GO:004…	04075(Plant hormone signal transduction);04075(Plant hormone signal transduction)	0.000868392
XM_016619769.1:1782	nta-miR172c	XM_016619769.1	MSTRG.21143	LOC107796949	PREDICTED: ethylene-responsive transcription factor RAP2-7-like isoform X1 [Nicotiana tabacum]	GO:0003677(DNA binding);GO:0003700(transcription factor activity, sequence-specific DNA binding);GO:0005634(nucleus);GO:0006351(transcription, DNA-templated);GO:0006355(regulation of transcription, DNA-templated);GO:0009908(flower development);GO:0010073(meristem maintenance);GO:0010093(specification of floral organ identity);GO:0019953(sexual reproduction);GO:0030154(cell differentiation);GO:004…	NA	0.00123336
XM_016619768.1:1780	nta-miR172c	XM_016619768.1	MSTRG.21143	LOC107796949	PREDICTED: ethylene-responsive transcription factor RAP2-7-like isoform X1 [Nicotiana tabacum]	GO:0003677(DNA binding);GO:0003700(transcription factor activity, sequence-specific DNA binding);GO:0005634(nucleus);GO:0006351(transcription, DNA-templated);GO:0006355(regulation of transcription, DNA-templated);GO:0009908(flower development);GO:0010073(meristem maintenance);GO:0010093(specification of floral organ identity);GO:0019953(sexual reproduction);GO:0030154(cell differentiation);GO:004…	NA	0.00202508
XM_016599233.1:1758	nta-miR172c	XM_016599233.1	MSTRG.15422	LOC107778909	PREDICTED: ethylene-responsive transcription factor RAP2-7-like isoform X1 [Nicotiana tabacum]	GO:0010227(floral organ abscission);GO:0048316(seed development);GO:0048461(flower structural organization);GO:0080187(floral organ senescence);GO:0080187(floral organ senescence)	NA	0.00289171
XM_016644157.1:1444	nta-miR172a_R-1	XM_016644157.1	107818199	LOC107818199	PREDICTED: floral homeotic protein APETALA 2-like isoform X1 [Nicotiana tabacum]	GO:0010227(floral organ abscission);GO:0048316(seed development);GO:0048461(flower structural organization);GO:0080187(floral organ senescence);GO:0080187(floral organ senescence)	04075(Plant hormone signal transduction);04075(Plant hormone signal transduction)	0.00346905
XM_016605496.1:1629	nta-miR172c	XM_016605496.1	107784366	LOC107784366	PREDICTED: AP2-like ethylene-responsive transcription factor TOE3 isoform X1 [Nicotiana tabacum]	GO:0003677(DNA binding);GO:0003700(transcription factor activity, sequence-specific DNA binding);GO:0005634(nucleus);GO:0006351(transcription, DNA-templated);GO:0006355(regulation of transcription, DNA-templated);GO:0009908(flower development);GO:0010073(meristem maintenance);GO:0010093(specification of floral organ identity);GO:0019953(sexual reproduction);GO:0030154(cell differentiation);GO:004…	NA	0.00462272
XM_016644149.1:1489	nta-miR172a_R-1	XM_016644149.1	107818199	LOC107818199	PREDICTED: floral homeotic protein APETALA 2-like isoform X1 [Nicotiana tabacum]	GO:0010227(floral organ abscission);GO:0048316(seed development);GO:0048461(flower structural organization);GO:0080187(floral organ senescence);GO:0080187(floral organ senescence)	04075(Plant hormone signal transduction);04075(Plant hormone signal transduction)	0.00491093
XM_016605494.1:1674	nta-miR172c	XM_016605494.1	107784366	LOC107784366	PREDICTED: AP2-like ethylene-responsive transcription factor TOE3 isoform X1 [Nicotiana tabacum]	GO:0003677(DNA binding);GO:0003700(transcription factor activity, sequence-specific DNA binding);GO:0005634(nucleus);GO:0006351(transcription, DNA-templated);GO:0006355(regulation of transcription, DNA-templated);GO:0009908(flower development);GO:0010073(meristem maintenance);GO:0010093(specification of floral organ identity);GO:0019953(sexual reproduction);GO:0030154(cell differentiation);GO:004…	NA	0.00492431
XM_016640246.1:1891	nta-miR172c	XM_016640246.1	MSTRG.3125	LOC107814784	PREDICTED: ethylene-responsive transcription factor RAP2-7-like isoform X2 [Nicotiana tabacum]	GO:0003677(DNA binding);GO:0003700(transcription factor activity, sequence-specific DNA binding);GO:0005634(nucleus);GO:0006351(transcription, DNA-templated);GO:0006355(regulation of transcription, DNA-templated);GO:0009908(flower development);GO:0010073(meristem maintenance);GO:0010093(specification of floral organ identity);GO:0019953(sexual reproduction);GO:0030154(cell differentiation);GO:004…	04075(Plant hormone signal transduction);04075(Plant hormone signal transduction)	0.00533358
XM_016627032.1:1384	nta-miR172a_R-1	XM_016627032.1	107803338	LOC107803338	PREDICTED: ethylene-responsive transcription factor RAP2-7-like isoform X2 [Nicotiana tabacum]	GO:0003677(DNA binding);GO:0003700(transcription factor activity, sequence-specific DNA binding);GO:0005634(nucleus);GO:0006351(transcription, DNA-templated);GO:0006355(regulation of transcription, DNA-templated);GO:0009908(flower development);GO:0010073(meristem maintenance);GO:0010093(specification of floral organ identity);GO:0019953(sexual reproduction);GO:0030154(cell differentiation);GO:004…	04075(Plant hormone signal transduction);04075(Plant hormone signal transduction)	0.00656035
MSTRG.9031.1:94	nta-miR172a_R-1	MSTRG.9031.1	MSTRG.9031	.	0	NA	NA	0.00836294
XR_001654099.1:1492	nta-miR172a_R-1	XR_001654099.1	MSTRG.25919	LOC107812324	PREDICTED: AP2-like ethylene-responsive transcription factor TOE3 [Nicotiana sylvestris]	GO:0010227(floral organ abscission);GO:0048316(seed development);GO:0048461(flower structural organization);GO:0080187(floral organ senescence)	04075(Plant hormone signal transduction)	0.00979774
XM_016645923.1:1827	nta-miR172a_R-1	XM_016645923.1	MSTRG.4757	LOC107819773	PREDICTED: AP2-like ethylene-responsive transcription factor TOE3 isoform X3 [Nicotiana sylvestris]	GO:0003677(DNA binding);GO:0003700(transcription factor activity, sequence-specific DNA binding);GO:0005634(nucleus);GO:0006351(transcription, DNA-templated);GO:0006355(regulation of transcription, DNA-templated);GO:0009908(flower development);GO:0010073(meristem maintenance);GO:0010093(specification of floral organ identity);GO:0019953(sexual reproduction);GO:0030154(cell differentiation);GO:004…	04075(Plant hormone signal transduction);04075(Plant hormone signal transduction)	0.012713
XM_016609595.1:189	nta-MIR172a-p5	XM_016609595.1	107787966	LOC107787966	PREDICTED: calmodulin-like protein 1 [Nicotiana tabacum]	GO:0005509(calcium ion binding)	04626(Plant-pathogen interaction)	0.0307917
XM_016656719.1:2000	nta-miR319a_R-1	XM_016656719.1	MSTRG.7846	LOC107829243	PREDICTED: transcription factor TCP2-like [Nicotiana tabacum]	GO:0003677(DNA binding);GO:0003700(transcription factor activity, sequence-specific DNA binding);GO:0005515(protein binding);GO:0005634(nucleus);GO:0006351(transcription, DNA-templated);GO:0006355(regulation of transcription, DNA-templated);GO:0009637(response to blue light);GO:0009965(leaf morphogenesis);GO:0030154(cell differentiation);GO:0045962(positive regulation of development, heterochroni…	NA	0.0135185
XM_016608290.1:1738	nta-miR319a_R-1	XM_016608290.1	MSTRG.17943	LOC107786783	PREDICTED: transcription factor TCP4-like [Nicotiana tomentosiformis]	GO:0003677(DNA binding);GO:0003700(transcription factor activity, sequence-specific DNA binding);GO:0005515(protein binding);GO:0005634(nucleus);GO:0006351(transcription, DNA-templated);GO:0006355(regulation of transcription, DNA-templated);GO:0009793(embryo development ending in seed dormancy);GO:0009965(leaf morphogenesis);GO:0030154(cell differentiation);GO:0045962(positive regulation of devel…	NA	0.0243147
XM_016608291.1:1741	nta-miR319a_R-1	XM_016608291.1	MSTRG.17943	LOC107786783	PREDICTED: transcription factor TCP4-like [Nicotiana tomentosiformis]	GO:0003677(DNA binding);GO:0003700(transcription factor activity, sequence-specific DNA binding);GO:0005515(protein binding);GO:0005634(nucleus);GO:0006351(transcription, DNA-templated);GO:0006355(regulation of transcription, DNA-templated);GO:0009793(embryo development ending in seed dormancy);GO:0009965(leaf morphogenesis);GO:0030154(cell differentiation);GO:0045962(positive regulation of devel…	NA	0.0248796
XM_016597768.1:185	nta-miR319a_R-1	XM_016597768.1	MSTRG.15043	LOC107777682	PREDICTED: transcription factor PCF7-like [Nicotiana attenuata];PREDICTED: transcription factor TCP4-like [Nicotiana tabacum]	GO:0003677(DNA binding);GO:0003700(transcription factor activity, sequence-specific DNA binding);GO:0005515(protein binding);GO:0005634(nucleus);GO:0006351(transcription, DNA-templated);GO:0006355(regulation of transcription, DNA-templated);GO:0009793(embryo development ending in seed dormancy);GO:0009965(leaf morphogenesis);GO:0030154(cell differentiation);GO:0045962(positive regulation of devel…	NA	0.0251619
XR_001653016.1:634	nta-miR390a	XR_001653016.1	MSTRG.24574	LOC107807831	0	NA	NA	0.00346905
XR_001645035.1:571	nta-miR390a	XR_001645035.1	107772280	LOC107772280	0	NA	NA	0.00375759
MSTRG.62.1:232	nta-miR390b	MSTRG.62.1	MSTRG.62	.	0	NA	NA	0.0252645
XM_016588874.1:887	nta-miR396b	XM_016588874.1	107769640	LOC107769640	PREDICTED: growth-regulating factor 8-like [Nicotiana tabacum]	GO:0005524(ATP binding);GO:0005634(nucleus);GO:0006351(transcription, DNA-templated);GO:0006355(regulation of transcription, DNA-templated);GO:0009941(chloroplast envelope);GO:0048366(leaf development)	NA	0.00202508
XM_016642435.1:401	nta-miR396b	XM_016642435.1	107816694	LOC107816694	PREDICTED: growth-regulating factor 1-like [Nicotiana tomentosiformis]	GO:0005524(ATP binding);GO:0005634(nucleus);GO:0006351(transcription, DNA-templated);GO:0006355(regulation of transcription, DNA-templated);GO:0048366(leaf development)	NA	0.00231404
XM_016649915.1:821	nta-miR396b	XM_016649915.1	107823287	LOC107823287	PREDICTED: growth-regulating factor 8-like [Nicotiana tabacum]	GO:0005524(ATP binding);GO:0005634(nucleus);GO:0006351(transcription, DNA-templated);GO:0006355(regulation of transcription, DNA-templated);GO:0009941(chloroplast envelope);GO:0048366(leaf development)	NA	0.00260291
XM_016578298.1:74	nta-miR396b	XM_016578298.1	107760271	LOC107760271	PREDICTED: growth-regulating factor 1-like [Nicotiana sylvestris]	GO:0005515(protein binding);GO:0005524(ATP binding);GO:0005634(nucleus);GO:0006351(transcription, DNA-templated);GO:0006355(regulation of transcription, DNA-templated);GO:0009624(response to nematode);GO:0048364(root development);GO:0048366(leaf development);GO:0061062(regulation of nematode larval development)	NA	0.00346905
XM_016638344.1:855	nta-miR396b	XM_016638344.1	MSTRG.26163	LOC107813130	PREDICTED: growth-regulating factor 3-like [Nicotiana tabacum]	GO:0005524(ATP binding);GO:0005634(nucleus);GO:0006351(transcription, DNA-templated);GO:0006355(regulation of transcription, DNA-templated);GO:0008285(negative regulation of cell proliferation);GO:0009624(response to nematode);GO:0044212(transcription regulatory region DNA binding);GO:0048364(root development);GO:0048366(leaf development);GO:0061062(regulation of nematode larval development)	NA	0.00375759
XM_016622319.1:609	nta-miR396b	XM_016622319.1	107799231	LOC107799231	PREDICTED: growth-regulating factor 9 [Nicotiana tomentosiformis]	GO:0005634(nucleus);GO:0048366(leaf development)	NA	0.00404605
XM_016592247.1:421	nta-miR396b	XM_016592247.1	107772772	LOC107772772	PREDICTED: growth-regulating factor 1-like [Nicotiana tomentosiformis]	GO:0005524(ATP binding);GO:0005634(nucleus);GO:0006351(transcription, DNA-templated);GO:0006355(regulation of transcription, DNA-templated);GO:0048366(leaf development)	NA	0.00410528
XM_016617605.1:608	nta-miR396b	XM_016617605.1	107795016	LOC107795016	PREDICTED: growth-regulating factor 9 isoform X2 [Nicotiana sylvestris]	GO:0005634(nucleus);GO:0048366(leaf development);GO:0048366(leaf development)	NA	0.00519905
XM_016632892.1:1133	nta-miR396b	XM_016632892.1	MSTRG.24755	LOC107808379	PREDICTED: growth-regulating factor 1-like [Nicotiana sylvestris]	GO:0005515(protein binding);GO:0005524(ATP binding);GO:0005634(nucleus);GO:0006351(transcription, DNA-templated);GO:0006355(regulation of transcription, DNA-templated);GO:0009624(response to nematode);GO:0048364(root development);GO:0048366(leaf development);GO:0061062(regulation of nematode larval development)	NA	0.0054871
XM_016583362.1:1176	nta-miR396b	XM_016583362.1	MSTRG.10899	LOC107764760	PREDICTED: growth-regulating factor 1-like [Nicotiana tabacum]	GO:0005515(protein binding);GO:0005524(ATP binding);GO:0005634(nucleus);GO:0006351(transcription, DNA-templated);GO:0006355(regulation of transcription, DNA-templated);GO:0009624(response to nematode);GO:0048364(root development);GO:0048366(leaf development);GO:0061062(regulation of nematode larval development)	NA	0.00606293
XM_016590029.1:835	nta-miR396b	XM_016590029.1	MSTRG.12636	LOC107770693	PREDICTED: growth-regulating factor 3-like [Nicotiana sylvestris]	GO:0005524(ATP binding);GO:0005634(nucleus);GO:0006351(transcription, DNA-templated);GO:0006355(regulation of transcription, DNA-templated);GO:0008285(negative regulation of cell proliferation);GO:0009624(response to nematode);GO:0044212(transcription regulatory region DNA binding);GO:0048364(root development);GO:0048366(leaf development);GO:0061062(regulation of nematode larval development)	NA	0.00663843
XM_016617679.1:608	nta-miR396b	XM_016617679.1	107795016	LOC107795016	PREDICTED: growth-regulating factor 9 isoform X2 [Nicotiana sylvestris]	GO:0005634(nucleus);GO:0048366(leaf development);GO:0048366(leaf development)	NA	0.00692606
XM_016582129.1:1148	nta-miR396b	XM_016582129.1	107763641	LOC107763641	PREDICTED: growth-regulating factor 1-like [Nicotiana tabacum]	GO:0005515(protein binding);GO:0005524(ATP binding);GO:0005634(nucleus);GO:0006351(transcription, DNA-templated);GO:0006355(regulation of transcription, DNA-templated);GO:0009624(response to nematode);GO:0048364(root development);GO:0048366(leaf development);GO:0061062(regulation of nematode larval development)	NA	0.00750106
XM_016603172.1:570	nta-miR396b	XM_016603172.1	107782296	LOC107782296	PREDICTED: growth-regulating factor 4-like isoform X1 [Nicotiana tabacum]	GO:0005524(ATP binding);GO:0005634(nucleus);GO:0006351(transcription, DNA-templated);GO:0006355(regulation of transcription, DNA-templated);GO:0048366(leaf development);GO:0048366(leaf development)	NA	0.00951095
XM_016626372.1:861	nta-miR396b	XM_016626372.1	107802800	LOC107802800	PREDICTED: growth-regulating factor 4-like isoform X2 [Nicotiana tomentosiformis]	GO:0005524(ATP binding);GO:0005634(nucleus);GO:0006351(transcription, DNA-templated);GO:0006355(regulation of transcription, DNA-templated);GO:0048366(leaf development);GO:0048366(leaf development)	NA	0.0100845
XM_016652122.1:561	nta-miR396b	XM_016652122.1	#N/A	#N/A	#N/A	#N/A	#N/A	0.0103711
XM_016652120.1:624	nta-miR396b	XM_016652120.1	107825286	LOC107825286	PREDICTED: growth-regulating factor 4-like [Nicotiana tabacum]	GO:0005524(ATP binding);GO:0005634(nucleus);GO:0006351(transcription, DNA-templated);GO:0006355(regulation of transcription, DNA-templated);GO:0048366(leaf development);GO:0048366(leaf development)	NA	0.0106576
XM_016638052.1:1447	nta-miR396b	XM_016638052.1	107812877	LOC107812877	PREDICTED: growth-regulating factor 5-like isoform X2 [Nicotiana sylvestris]	GO:0005524(ATP binding);GO:0005634(nucleus);GO:0006351(transcription, DNA-templated);GO:0006355(regulation of transcription, DNA-templated);GO:0048366(leaf development);GO:0048366(leaf development)	NA	0.0112305
XM_016652124.1:620	nta-miR396b	XM_016652124.1	107825286	LOC107825286	PREDICTED: growth-regulating factor 4-like [Nicotiana tabacum]	GO:0005524(ATP binding);GO:0005634(nucleus);GO:0006351(transcription, DNA-templated);GO:0006355(regulation of transcription, DNA-templated);GO:0048366(leaf development);GO:0048366(leaf development)	NA	0.0115168
XM_016652121.1:620	nta-miR396b	XM_016652121.1	107825286	LOC107825286	PREDICTED: growth-regulating factor 4-like [Nicotiana tabacum]	GO:0005524(ATP binding);GO:0005634(nucleus);GO:0006351(transcription, DNA-templated);GO:0006355(regulation of transcription, DNA-templated);GO:0048366(leaf development);GO:0048366(leaf development)	NA	0.011803
XM_016622245.1:177	nta-miR396b	XM_016622245.1	107799160	LOC107799160	PREDICTED: growth-regulating factor 5-like [Nicotiana tabacum]	GO:0005634(nucleus);GO:0009739(response to gibberellin);GO:0030912(response to deep water)	NA	0.0120891
XM_016652123.1:618	nta-miR396b	XM_016652123.1	#N/A	#N/A	#N/A	#N/A	#N/A	0.0126611
XR_001642347.1:285	nta-MIR396c-p3	XR_001642347.1	107760167	LOC107760167	0	NA	NA	0.012713
XM_016638050.1:847	nta-miR396b	XM_016638050.1	107812877	LOC107812877	PREDICTED: growth-regulating factor 5-like isoform X2 [Nicotiana sylvestris]	GO:0005524(ATP binding);GO:0005634(nucleus);GO:0006351(transcription, DNA-templated);GO:0006355(regulation of transcription, DNA-templated);GO:0048366(leaf development);GO:0048366(leaf development)	NA	0.012947
XM_016638051.1:675	nta-miR396b	XM_016638051.1	#N/A	#N/A	#N/A	#N/A	#N/A	0.0132328
XM_016603166.1:654	nta-miR396b	XM_016603166.1	107782296	LOC107782296	PREDICTED: growth-regulating factor 4-like isoform X1 [Nicotiana tabacum]	GO:0005524(ATP binding);GO:0005634(nucleus);GO:0006351(transcription, DNA-templated);GO:0006355(regulation of transcription, DNA-templated);GO:0048366(leaf development);GO:0048366(leaf development)	NA	0.0175335
XM_016630899.1:625	nta-miR396b	XM_016630899.1	107806689	LOC107806689	PREDICTED: uncharacterized protein LOC104087137 isoform X2 [Nicotiana tomentosiformis]	GO:0003674(molecular_function);GO:0005739(mitochondrion);GO:0008150(biological_process);GO:0008150(biological_process)	NA	0.0260085
XM_016630900.1:625	nta-miR396b	XM_016630900.1	107806689	LOC107806689	PREDICTED: uncharacterized protein LOC104087137 isoform X2 [Nicotiana tomentosiformis]	GO:0003674(molecular_function);GO:0005739(mitochondrion);GO:0008150(biological_process);GO:0008150(biological_process)	NA	0.0265724
XM_016651467.1:634	nta-miR396b	XM_016651467.1	107824668	LOC107824668	PREDICTED: uncharacterized protein LOC107824668 isoform X1 [Nicotiana tabacum]	GO:0003674(molecular_function);GO:0005739(mitochondrion);GO:0008150(biological_process);GO:0008150(biological_process)	NA	0.0268543
XM_016651468.1:634	nta-miR396b	XM_016651468.1	107824668	LOC107824668	PREDICTED: uncharacterized protein LOC107824668 isoform X1 [Nicotiana tabacum]	GO:0003674(molecular_function);GO:0005739(mitochondrion);GO:0008150(biological_process);GO:0008150(biological_process)	NA	0.0271361
XM_016654301.1:471	nta-miR396b	XM_016654301.1	MSTRG.7157	LOC107827209	PREDICTED: cyclic phosphodiesterase-like isoform X1 [Nicotiana sylvestris]	GO:0004112(cyclic-nucleotide phosphodiesterase activity);GO:0005737(cytoplasm);GO:0006388(tRNA splicing, via endonucleolytic cleavage and ligation)	NA	0.0369469
XM_016583599.1:1783	nta-MIR398-p5	XM_016583599.1	107765023	LOC107765023	PREDICTED: receptor-like serine/threonine-protein kinase NCRK isoform X1 [Nicotiana tabacum]	GO:0004674(protein serine/threonine kinase activity);GO:0005524(ATP binding);GO:0005768(endosome);GO:0005886(plasma membrane);GO:0006468(protein phosphorylation);GO:0010008(endosome membrane);GO:0010089(xylem development);GO:0012505(endomembrane system);GO:0016021(integral component of membrane);GO:0016301(kinase activity);GO:0031902(late endosome membrane);GO:0051020(GTPase binding);GO:0051020(G…	04626(Plant-pathogen interaction);04626(Plant-pathogen interaction)	0.00737737
XM_016586032.1:508	nta-miR398_L+2R-2	XM_016586032.1	MSTRG.11570	LOC107767110	PREDICTED: tubulin-folding cofactor B-like [Nicotiana tomentosiformis]	GO:0005515(protein binding);GO:0005634(nucleus);GO:0005737(cytoplasm);GO:0005829(cytosol);GO:0007021(tubulin complex assembly);GO:0009524(phragmoplast);GO:0009793(embryo development ending in seed dormancy);GO:0051301(cell division);GO:0051301(cell division)	NA	0.0172253
XM_016628138.1:1829	nta-MIR398-p5	XM_016628138.1	107804274	LOC107804274	PREDICTED: receptor-like serine/threonine-protein kinase NCRK isoform X1 [Nicotiana tabacum]	GO:0004674(protein serine/threonine kinase activity);GO:0005524(ATP binding);GO:0005768(endosome);GO:0005886(plasma membrane);GO:0006468(protein phosphorylation);GO:0010008(endosome membrane);GO:0010089(xylem development);GO:0012505(endomembrane system);GO:0016021(integral component of membrane);GO:0016301(kinase activity);GO:0031902(late endosome membrane);GO:0051020(GTPase binding);GO:0051020(G…	04626(Plant-pathogen interaction);04626(Plant-pathogen interaction)	0.0434992
XM_016640548.1:1371	nta-miR399a	XM_016640548.1	107815042	LOC107815042	PREDICTED: nuclear transcription factor Y subunit A-10-like isoform X4 [Nicotiana tabacum]	GO:0003677(DNA binding);GO:0003700(transcription factor activity, sequence-specific DNA binding);GO:0005634(nucleus);GO:0006351(transcription, DNA-templated);GO:0006355(regulation of transcription, DNA-templated);GO:0009567(double fertilization forming a zygote and endosperm);GO:0016602(CCAAT-binding factor complex);GO:0016602(CCAAT-binding factor complex)	NA	0.0146606
XM_016640549.1:1377	nta-miR399a	XM_016640549.1	107815042	LOC107815042	PREDICTED: nuclear transcription factor Y subunit A-10-like isoform X4 [Nicotiana tabacum]	GO:0003677(DNA binding);GO:0003700(transcription factor activity, sequence-specific DNA binding);GO:0005634(nucleus);GO:0006351(transcription, DNA-templated);GO:0006355(regulation of transcription, DNA-templated);GO:0009567(double fertilization forming a zygote and endosperm);GO:0016602(CCAAT-binding factor complex);GO:0016602(CCAAT-binding factor complex)	NA	0.0152311
MSTRG.24915.1:1328	nta-miR399a	MSTRG.24915.1	MSTRG.24915	LOC107808910	PREDICTED: nuclear transcription factor Y subunit A-10-like [Nicotiana tabacum]	GO:0003677(DNA binding);GO:0003700(transcription factor activity, sequence-specific DNA binding);GO:0005634(nucleus);GO:0006351(transcription, DNA-templated);GO:0006355(regulation of transcription, DNA-templated);GO:0009567(double fertilization forming a zygote and endosperm);GO:0016602(CCAAT-binding factor complex)	NA	0.0160862
XM_016640550.1:1357	nta-miR399a	XM_016640550.1	107815042	LOC107815042	PREDICTED: nuclear transcription factor Y subunit A-10-like isoform X4 [Nicotiana tabacum]	GO:0003677(DNA binding);GO:0003700(transcription factor activity, sequence-specific DNA binding);GO:0005634(nucleus);GO:0006351(transcription, DNA-templated);GO:0006355(regulation of transcription, DNA-templated);GO:0009567(double fertilization forming a zygote and endosperm);GO:0016602(CCAAT-binding factor complex);GO:0016602(CCAAT-binding factor complex)	NA	0.0163711
XM_016640551.1:1314	nta-miR399a	XM_016640551.1	107815042	LOC107815042	PREDICTED: nuclear transcription factor Y subunit A-10-like isoform X4 [Nicotiana tabacum]	GO:0003677(DNA binding);GO:0003700(transcription factor activity, sequence-specific DNA binding);GO:0005634(nucleus);GO:0006351(transcription, DNA-templated);GO:0006355(regulation of transcription, DNA-templated);GO:0009567(double fertilization forming a zygote and endosperm);GO:0016602(CCAAT-binding factor complex);GO:0016602(CCAAT-binding factor complex)	NA	0.0166559
XM_016640552.1:1301	nta-miR399a	XM_016640552.1	107815042	LOC107815042	PREDICTED: nuclear transcription factor Y subunit A-10-like isoform X4 [Nicotiana tabacum]	GO:0003677(DNA binding);GO:0003700(transcription factor activity, sequence-specific DNA binding);GO:0005634(nucleus);GO:0006351(transcription, DNA-templated);GO:0006355(regulation of transcription, DNA-templated);GO:0009567(double fertilization forming a zygote and endosperm);GO:0016602(CCAAT-binding factor complex);GO:0016602(CCAAT-binding factor complex)	NA	0.0172253
XM_016598140.1:100	nta-miR408	XM_016598140.1	MSTRG.15134	LOC107777966	PREDICTED: basic blue protein-like [Nicotiana tabacum]	GO:0046658(anchored component of plasma membrane)	NA	0.00260291
XM_016589545.1:100	nta-miR408	XM_016589545.1	MSTRG.12500	LOC107770257	PREDICTED: basic blue protein-like [Nicotiana sylvestris]	GO:0046658(anchored component of plasma membrane)	NA	0.00289171
XM_016640504.1:1752	nta-miR482b-3p	XM_016640504.1	107814998	LOC107814998	PREDICTED: disease susceptibility protein LOV1-like [Nicotiana sylvestris]	GO:0005524(ATP binding);GO:0005575(cellular_component);GO:0006952(defense response);GO:0043531(ADP binding)	04626(Plant-pathogen interaction)	0.00173603
XM_016601791.1:388	nta-MIR482c-p5	XM_016601791.1	MSTRG.16157	LOC107781147	PREDICTED: putative cytochrome c oxidase subunit 5b-like [Nicotiana tabacum]	GO:0004129(cytochrome-c oxidase activity);GO:0005739(mitochondrion);GO:0005740(mitochondrial envelope);GO:0005743(mitochondrial inner membrane);GO:0008270(zinc ion binding);GO:0009535(chloroplast thylakoid membrane);GO:0046872(metal ion binding);GO:0050897(cobalt ion binding)	00190(Oxidative phosphorylation)	0.0112021
XM_016659425.1:695	nta-miR482d	XM_016659425.1	107831644	LOC107831644	PREDICTED: disease resistance protein TAO1-like [Nicotiana tabacum]	GO:0005737(cytoplasm);GO:0006952(defense response);GO:0007165(signal transduction);GO:0009506(plasmodesma);GO:0009507(chloroplast);GO:0016021(integral component of membrane);GO:0043531(ADP binding)	03040(Spliceosome);04141(Protein processing in endoplasmic reticulum);04144(Endocytosis)	0.0219914
MSTRG.1980.1:317	nta-miR827	MSTRG.1980.1	MSTRG.1980	.	0	NA	NA	0.012713
XM_016643897.1:322	nta-miR827	XM_016643897.1	MSTRG.4187	LOC107817998	PREDICTED: SPX domain-containing membrane protein At4g22990-like isoform X1 [Nicotiana sylvestris]	GO:0005622(intracellular);GO:0005623(cell);GO:0006817(phosphate ion transport);GO:0009705(plant-type vacuole membrane);GO:0016021(integral component of membrane);GO:0055085(transmembrane transport)	NA	0.0376563
XM_016624148.1:161	nta-miR6019a	XM_016624148.1	107800887	LOC107800887	PREDICTED: TMV resistance protein N-like isoform X1 [Nicotiana sylvestris]	GO:0005515(protein binding)	03040(Spliceosome);04141(Protein processing in endoplasmic reticulum);04144(Endocytosis)	0.000289548
XM_016579417.1:4780	nta-miR6019a	XM_016579417.1	107761218	LOC107761218	PREDICTED: LOW QUALITY PROTEIN: uncharacterized protein LOC107761218, partial [Nicotiana tabacum]	GO:0005515(protein binding)	03040(Spliceosome);04141(Protein processing in endoplasmic reticulum);04144(Endocytosis)	0.000579012
XM_016644582.1:161	nta-miR6019a	XM_016644582.1	#N/A	#N/A	#N/A	#N/A	#N/A	0.000868392
XM_016644581.1:162	nta-miR6019a	XM_016644581.1	MSTRG.4361	LOC107818550	PREDICTED: TMV resistance protein N-like [Nicotiana sylvestris]	GO:0005515(protein binding);GO:0005515(protein binding)	03040(Spliceosome);04141(Protein processing in endoplasmic reticulum);04144(Endocytosis);04144(Endocytosis)	0.0014469
XM_016624149.1:161	nta-miR6019a	XM_016624149.1	#N/A	#N/A	#N/A	#N/A	#N/A	0.00173603
XM_016644580.1:162	nta-miR6019a	XM_016644580.1	MSTRG.4361	LOC107818550	PREDICTED: TMV resistance protein N-like [Nicotiana sylvestris]	GO:0005515(protein binding);GO:0005515(protein binding)	03040(Spliceosome);04141(Protein processing in endoplasmic reticulum);04144(Endocytosis);04144(Endocytosis)	0.00202508
XM_016579417.1:95	nta-miR6019a	XM_016579417.1	107761218	LOC107761218	PREDICTED: LOW QUALITY PROTEIN: uncharacterized protein LOC107761218, partial [Nicotiana tabacum]	GO:0005515(protein binding)	03040(Spliceosome);04141(Protein processing in endoplasmic reticulum);04144(Endocytosis)	0.0498907
XM_016579418.1:257	nta-miR6020b	XM_016579418.1	MSTRG.9672	LOC107761220	PREDICTED: TMV resistance protein N-like [Nicotiana tabacum]	GO:0005515(protein binding)	03040(Spliceosome);04141(Protein processing in endoplasmic reticulum);04144(Endocytosis)	0.00404605
MSTRG.9672.2:255	nta-miR6020b	MSTRG.9672.2	MSTRG.9672	LOC107761220	PREDICTED: TMV resistance protein N-like [Nicotiana tabacum]	GO:0005515(protein binding)	03040(Spliceosome);04141(Protein processing in endoplasmic reticulum);04144(Endocytosis)	0.00433443
XR_001651410.1:575	nta-miR6020a-5p	XR_001651410.1	107800403	LOC107800403	PREDICTED: TMV resistance protein N-like [Nicotiana sylvestris]	GO:0005515(protein binding);GO:0005515(protein binding)	03040(Spliceosome);04141(Protein processing in endoplasmic reticulum);04144(Endocytosis);04144(Endocytosis)	0.012713
XM_016611621.1:270	nta-miR6020a-5p	XM_016611621.1	#N/A	#N/A	#N/A	#N/A	#N/A	0.0376563
XM_016624148.1:147	nta-miR6020a-5p	XM_016624148.1	107800887	LOC107800887	PREDICTED: TMV resistance protein N-like isoform X1 [Nicotiana sylvestris]	GO:0005515(protein binding)	03040(Spliceosome);04141(Protein processing in endoplasmic reticulum);04144(Endocytosis)	0.0498907
