# Supplementary material for: Small RNA and Degradome Sequencing Reveal Important MicroRNA Function in Nicotiana tabacum Response to Bemisia tabaci
Source: Genes (Basel). 2022 Feb 17;13(2):361. doi: 10.3390/genes13020361 (PMC8871844; doi:10.3390/genes13020361)
Supplement: Supplementary file 1 [file genes-13-00361-s001.zip]

Archive with 14 entries (14 files):
- Supplementary Data S1. Summary of known and novel miRNA in this study_20220216.xlsx
- Supplementary Data S2. Unique miRNAs and their target genes annotation in Control or Infested_20220216.xlsx
- Supplementary Data S3. All differential miRNAs_20220216.xlsx
- Supplementary Data S4. Degradome sequencing results_20220216.xlsx
- Supplementary Figures_20220216.pdf
- Supplementary Table S1_20220216.xlsx
- Supplementary Table S2_20220216.xlsx
- Supplementary Table S3_20220216.xlsx
- Supplementary Table S4_20220216.xlsx
- Supplementary Table S5_20220216.xlsx
- Supplementary Table S6_20220216.xlsx
- Supplementary Table S7_20220216.xlsx
- Supplementary Table S8_20220216.xlsx
- Supplementary Table S9_20220216.xlsx
